# Supplementary material for: How bulky ligands control the chemoselectivity of Pd-catalyzed N-arylation of ammonia
Source: PubMed Central journal article supplement — Chem Sci. 2019 Dec 12;11(4):1017–25. doi: 10.1039/c9sc03095f (PMC8145866; doi:10.1039/c9sc03095f), 2019-12-12
Supplement: SC-011-C9SC03095F-s001.pdf [file SC-011-C9SC03095F-s001.pdf]

## *Supporting Information*

# How Bulky Ligands Control the Chemoselectivity of Pd-Catalyzed N-Arylation of Ammonia

*Seoung-Tae Kim,<sup>a,b</sup> Suyeon Kim,<sup>a,b</sup> and Mu-Hyun Baik<sup>b,a\*</sup>*

<sup>a</sup>Department of Chemistry, Korea Advanced Institute of Science and Technology (KAIST), Daejeon  
34141, Republic of Korea

<sup>b</sup>Center for Catalytic Hydrocarbon Functionalizations, Institute for Basic Science (IBS), Daejeon 34141,  
Republic of Korea

Email: mbaik2805@kaist.ac.kr

----- *Table of Contents* -----

|                                                                                          |             |
|------------------------------------------------------------------------------------------|-------------|
| <b>1. Deprotonation of Amine</b> .....                                                   | <b>S3</b>   |
| 1.1. Tetrameric structure of the base .....                                              | <b>S3</b>   |
| 1.2. Ligand exchange pathway .....                                                       | <b>S3</b>   |
| <b>2. Distal Pathway with L3</b> .....                                                   | <b>S4</b>   |
| <b>3. Oxidative Addition</b> .....                                                       | <b>S5</b>   |
| <b>4. Consideration of Dioxane Coordination</b> .....                                    | <b>S5</b>   |
| <b>5. Reason of Higher Rotamer Energy for the Distal Form in L3 Compared to L2</b> ..... | <b>S6</b>   |
| <b>6. Computed Data</b> .....                                                            | <b>S7</b>   |
| 6.1. Cartesian coordinates of the optimized geometries .....                             | <b>S7</b>   |
| 6.2. Vibrational frequencies (in $\text{cm}^{-1}$ ) of the optimized geometries .....    | <b>S164</b> |
| 6.3. Computed energies of DFT-optimized structures .....                                 | <b>S243</b> |
| <b>7. References</b> .....                                                               | <b>S248</b> |

# 1. Deprotonation of the Amine

## 1.1. Tetrameric structure of the base

The base NaO<sup>t</sup>Bu is modeled as a tetrameric cubane-type cluster, which is the most plausible form of the base in non-polar solvent environment provided by 1,4-dioxane ( $\epsilon = 2.209$ ). The monomer-form is thought to be not the appropriate structure in a low dielectric constant media, since it cannot effectively screen the highly polarized charge of the metal alkoxide. The tetrameric geometry of alkali metal alkoxide is supported by previous experimental observations<sup>1-3</sup> and calculation results. In our own calculations we found repeatedly that the base tetramer gave the most consistent results that allows for comparing our calculations to experiments.

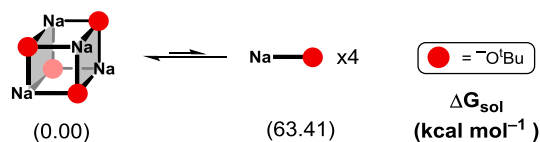

**Scheme S1.** DFT calculated equilibria between the tetramer- and monomer-form in dioxane.

## 1.2. Ligand exchange pathway

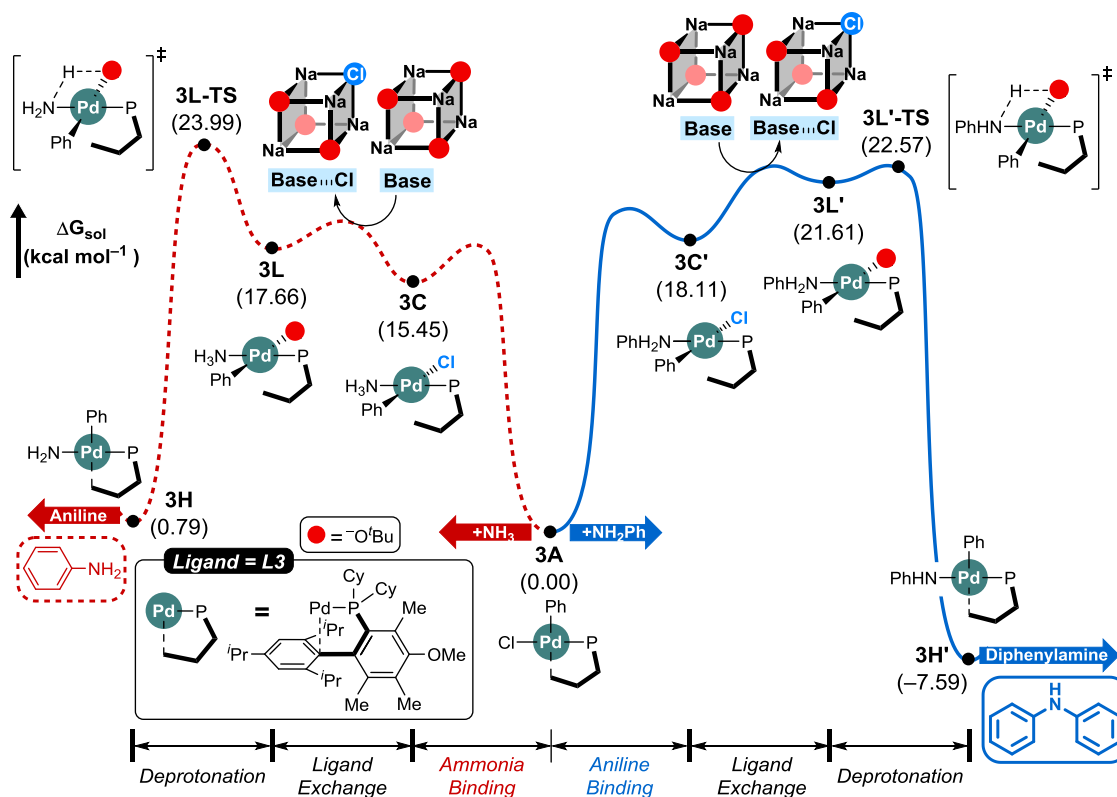

**Figure S1.** DFT calculated energy profile of the Pd-catalyzed *N*-arylation reaction with **L3** which follows ligand exchange pathway for deprotonation.

The ligand exchange pathway where the tetramer simply replaces the chloride with *tert*-butoxide during the deprotonation process is explored with **L3** ligand and the calculated energy profile of this pathway is summarized

in Figure S1. The calculations show that the ligand exchange step is endergonic. Both the ligand exchange product **3L** and **3L'** located 2.2 and 3.5 kcal mol<sup>-1</sup>, respectively, are higher in energy compared to the reactant **3C** and **3C'** whereas binding of the tetramer to the same reactants results in a more stable intermediates, as described in the main text. Without the steric effect due to the tetramer binding, however, the step barrier for the deprotonation is reduced and therefore, the overall deprotonation barriers become reasonable for the given experimental conditions. The deprotonation transition state, **3L-TS** and **3L'-TS** are computed to be 24.0 and 22.6 kcal mol<sup>-1</sup> in energy, respectively. Although the ligand exchange pathway indicates reasonable barriers, this pathway is abandoned since it predicts di-phenylation. Note that the ligand exchange step may not be possible due to high barriers while we assume it to be possible in the aforementioned mechanism.

## 2. Distal Pathway with L3

The possibility of the mechanism adopting distal form intermediates for the deprotonation process is also explored since the barrier is accessible in the given condition (80 °C).

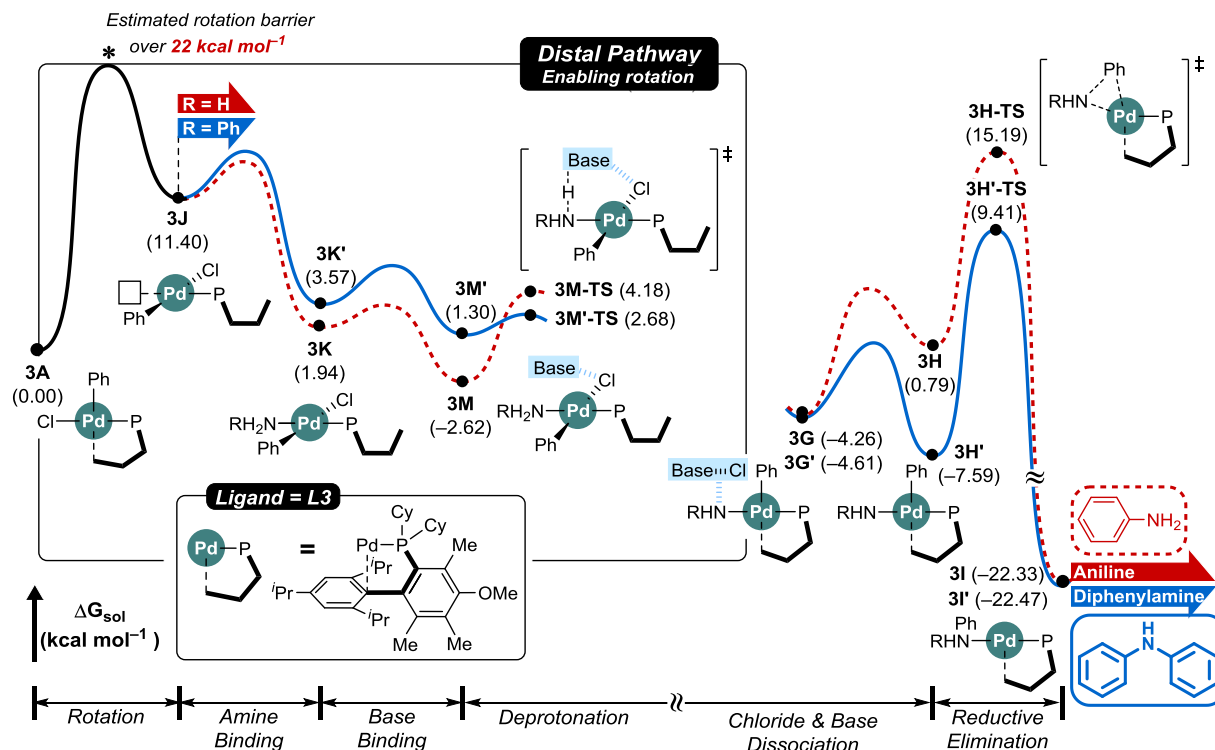

**Figure S2.** DFT calculated energy profile of the Pd-catalyzed *N*-arylation reaction with **L3** that involves  $\sigma$ -rotation of P–C<sub>1</sub> bond reaching for distal form during amine binding. \* represents the estimated rotation barrier which is estimated over 22 kcal mol<sup>-1</sup>.

Figure S2 displays the results for the distal pathway and the deprotonation process is highlighted in the square box. As expected, the access to the distal form effectively releases the steric congestion and the deprotonation process requires lower energies compared to the proximal pathway. Accordingly, the highest barrier step of this mechanism

becomes the reductive elimination step and leads to dominant generation of diphenylamine. In conclusion, this alternative path is judged to be mechanistically irrelevant because it is not only calculated to be energetically high, but it cannot properly account for the experimental observations.

### 3. Oxidative Addition

The oxidative addition step is examined and the result is illustrated in Scheme S2. The barrier for the oxidative addition is computed to be 10.1 kcal mol<sup>-1</sup> and 9.5 kcal mol<sup>-1</sup> with L1 and L3, respectively. The calculated energies are in a good agreement with the reported trend that electron-rich phosphine ligated Pd-catalyst readily performs the oxidative addition.

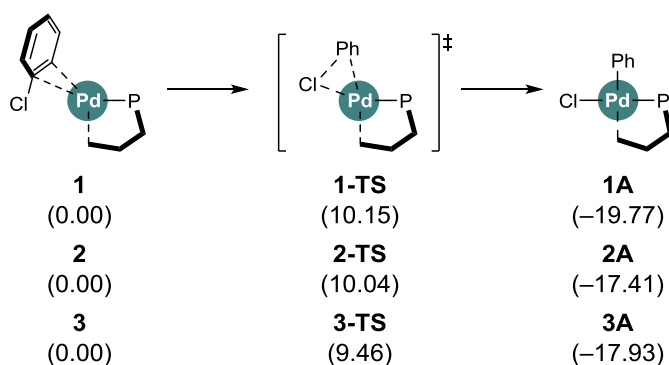

**Scheme S2.** Computed oxidative addition barrier with **L1** and **L3**.

### 4. Consideration of Dioxane Coordination

The effect of solvent coordination is examined and summarized in Scheme S3. The calculations show that the coordination of dioxane is less preferable than the amine binding in both ligands and therefore it would not impact to the reaction outcome.

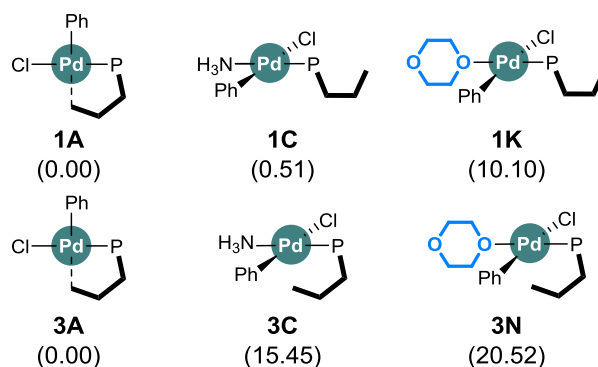

**Scheme S3.** Relative free energies of dioxane binding Pd-complexes.

## 5. Reason of Higher Rotamer Energy for the Distal Form in L3 Compared to L2

The effect of alkyl groups on phosphine, <sup>i</sup>Pr in **L2** and Cy in **L3**, needs to be addressed as it has a profound influence on the rotation barrier. While it is obvious that the methylation at C<sub>6</sub> position impedes the rotation leading to a distal intermediate, the difference between <sup>i</sup>Pr and Cy is more difficult to understand. We postulated that the inherent rigidity of Cy is responsible for the higher rotamer energy in **L3** system and performed an energy decomposition analysis. We estimated the rotation barrier from the highest energy rotamer as we scan through different angles. As depicted in Figure S3, the steric clash between R<sup>1</sup> on phosphorus and methyl on C<sub>6</sub> position is expected to be a key factor that could illustrate the effect of the alkyl group on the phosphorus. Therefore, we partitioned each intermediate into “R<sup>1</sup>-” and “catalyst-” fragments and decomposed the electronic energy of the highest energy rotamer as a sum of distortion energies of the fragments and the repulsive interaction between the fragments when the ground state intermediate is transformed to the highest energy rotamer. We found that the 4.3 kcal mol<sup>-1</sup> higher rotamer energy of the **L3** system is derived from the distortion energy of the catalyst and repulsive interactions of 2.0 and 3.1 kcal mol<sup>-1</sup>, respectively, while the distortion of the R<sup>1</sup>-fragment gives -0.8 kcal mol<sup>-1</sup>. This result suggests that the flexible nature of <sup>i</sup>Pr in **L2** indeed reduces the rotation barrier by more easily undergoing a distortion which reduces both the repulsive interaction and the catalyst-fragment distortion.

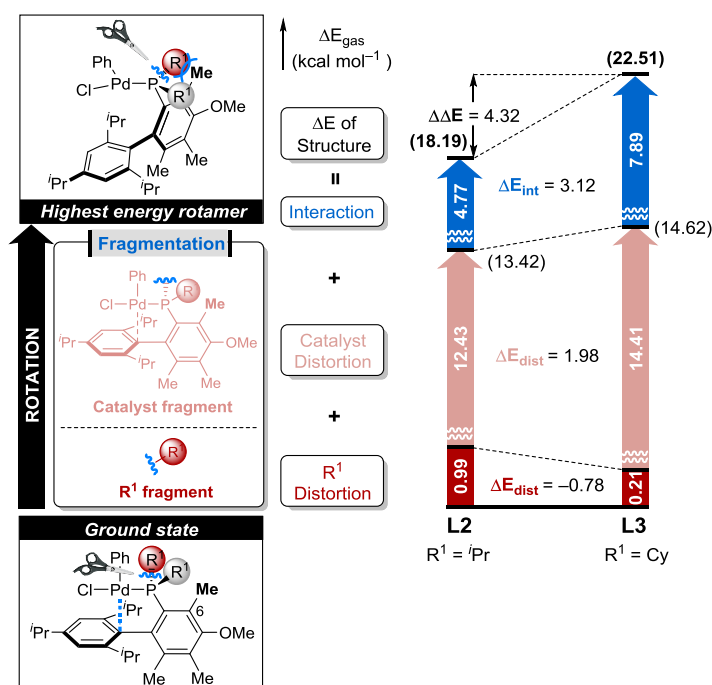

**Figure S3.** Schematic diagram for energy decomposition analysis that explain the highest rotamer energy difference between **L2** and **L3**. The highest rotamer electronic energy is represented as the sum of  $\Delta E_{\text{dist}}$  and  $\Delta E_{\text{int}}$  where  $\Delta E_{\text{dist}}$  describes a fragment distortion energy and  $\Delta E_{\text{int}}$  reveals the repulsive interaction between the two fragments.

## 6. Computed Data

### 6.1. Cartesian coordinates of the optimized geometries

=====  
PhCl  
=====

C -8.278672218 -1.132103443 -15.270842552  
C -9.494266510 -1.132104516 -14.586632729  
C -7.063052177 -1.132104754 -14.586631775  
C -9.485902786 -1.132099867 -13.190737724  
C -7.071382999 -1.132101536 -13.190735817  
C -8.278640747 -1.132097960 -12.489609718  
H -10.427747726 -1.132109165 -15.139132500  
H -6.129575253 -1.132103920 -15.139132500  
H -10.429926872 -1.132098436 -12.653925896  
H -6.127349854 -1.132102609 -12.653932571  
H -8.278670311 -1.132094741 -11.403867722  
Cl -8.278592110 -1.132086992 -17.029272079

=====  
NH<sub>3</sub>  
=====

N -2.699347973 0.000000000 -1.354788780  
H -2.699347973 0.937179983 -0.957365751  
H -1.887726903 -0.468589991 -0.957365751  
H -3.510968924 -0.468589991 -0.957365751

=====  
NH<sub>2</sub>Ph  
=====

C -8.278207779 -1.113700867 -15.298005104  
C -9.486708641 -1.119070888 -14.581107140  
C -7.070237637 -1.120200872 -14.580402374  
C -9.481367111 -1.132796645 -13.188205719  
C -7.076249599 -1.134922624 -13.187431335  
C -8.278981209 -1.140930176 -12.478212357  
H -10.429587364 -1.117057323 -15.123012543  
H -6.126886845 -1.118171453 -15.121580124  
H -10.427750587 -1.135254264 -12.653909683  
H -6.130127907 -1.138735294 -12.652656555  
H -8.279317856 -1.150434017 -11.392677307  
N -8.278257370 -1.155471087 -16.697374344  
H -7.439898491 -0.785945475 -17.126489639  
H -9.107039452 -0.766203761 -17.127586365

=====  
NHPh<sub>2</sub>  
=====

C -1.406577945 -0.106935531 -3.867493629  
C -2.165858030 -0.604516804 -2.812316418  
C -2.579502344 0.239996031 -1.767013907  
C -2.216227055 1.597265482 -1.811138988  
C -1.437634826 2.078644753 -2.861702442  
C -1.027129531 1.236659646 -3.897118568  
N -3.380785465 -0.291233867 -0.750251651

H -1.099949956 -0.778645337 -4.664547443  
H -2.555169582 2.270272970 -1.031777143  
H -1.165868521 3.130631447 -2.877785444  
H -0.425703943 1.622014999 -4.714528561  
H -2.437062502 -1.657251835 -2.782980919  
C -3.529286623 0.140047297 0.571446896  
C -4.707011223 -0.198329523 1.261167049  
C -2.528190851 0.853709042 1.254257441  
C -4.878651142 0.169220537 2.592725754  
C -2.720459461 1.231179833 2.581295252  
C -3.892098188 0.895746529 3.262495756  
H -5.488679886 -0.748005509 0.741921842  
H -1.597746611 1.090057373 0.751010478  
H -5.796108723 -0.106281132 3.105693340  
H -1.935686350 1.783589602 3.090846062  
H -4.032938480 1.192163229 4.297160625  
H -3.934170961 -1.094530702 -1.006973743

=====  
NaO'Bu  
=====

C -21.563739777 -1.710090518 -19.240768433  
H -22.606143951 -1.661334038 -18.905662537  
H -21.116104126 -2.632519960 -18.848573685  
H -21.029621124 -0.854877234 -18.811069489  
C -21.510524750 -1.622011065 -20.784166336  
C -20.034313202 -1.682085991 -21.246446609  
H -19.483110428 -0.833507955 -20.825843811  
H -19.528831482 -2.608346939 -20.943563461  
H -19.991689682 -1.603914618 -22.338647842  
C -22.277824402 -2.824393988 -21.386510849  
H -22.246343613 -2.767193556 -22.480535507  
H -21.867099762 -3.793678045 -21.075902939  
H -23.328506470 -2.778903008 -21.077255249  
O -22.085363388 -0.442111313 -21.207120895  
Na -22.937793732 1.199886560 -21.772783279

=====  
(NaO'Bu)<sub>4</sub>  
=====

O 1.105023503 -1.162684798 -1.262741446  
O -1.730069757 -0.983165979 0.480384856  
O -0.456429929 1.764931679 -0.911157072  
O 1.068406105 0.360091865 1.702099204  
C 1.859494209 -1.952733755 -2.130182028  
C -2.907334328 -1.646344185 0.828789175  
C -0.776405931 2.967465401 -1.542294025  
C 1.825492740 0.634404540 2.841741085  
C 2.084769249 -3.353033066 -1.514219761  
H 1.115553379 -3.826457977 -1.308707356  
H 2.656531334 -4.021501064 -2.169043303  
H 2.635161400 -3.258794546 -0.567894101  
C 3.234359026 -1.294007182 -2.387773275  
H 3.873243809 -1.884083390 -3.055690050  
H 3.092674732 -0.305011690 -2.845259190  
H 3.766011238 -1.165194392 -1.435690403  
C 1.121567249 -2.113644123 -3.479611158  
H 0.150293067 -2.600929976 -3.316537857

H 0.945929766 -1.125087500 -3.924415350  
H 1.681393743 -2.716809034 -4.204462051  
C -2.577702284 -2.983742952 1.533938527  
H -1.982803345 -2.790010214 2.437613010  
H -3.472925663 -3.541768551 1.833781719  
H -1.992003679 -3.623893738 0.859418392  
C -3.743846178 -1.943848491 -0.438377827  
H -4.685371399 -2.461398363 -0.218227938  
H -3.987539768 -1.002916813 -0.951079190  
H -3.163622856 -2.575905085 -1.125141621  
C -3.748382092 -0.769616723 1.787445903  
H -3.997731447 0.182032079 1.297253370  
H -4.687622070 -1.247271657 2.091487408  
H -3.169939280 -0.554362714 2.696895361  
C 3.034838915 1.533801436 2.474166870  
H 2.677239418 2.470239401 2.019190073  
H 3.652993202 1.795159817 3.341622829  
H 3.680652380 1.013346434 1.748920441  
C 0.956160486 1.369929433 3.894119501  
H 0.086326905 0.748761535 4.156523705  
H 1.502380490 1.594960809 4.818119049  
H 0.594320714 2.323674440 3.478563786  
C 2.353660345 -0.685672164 3.460120440  
H 1.506585836 -1.328590035 3.746639490  
H 2.967019558 -1.222655177 2.720530033  
H 2.967523575 -0.523400545 4.354422092  
C 0.500876129 3.811744213 -1.757365584  
H 0.299664915 4.777682781 -2.235892296  
H 0.982467592 4.005378723 -0.789878547  
H 1.207102418 3.262190342 -2.394996405  
C -1.429093122 2.691769361 -2.917228699  
H -2.351133347 2.109584570 -2.781748772  
H -1.689850450 3.609208584 -3.458447218  
H -0.739024460 2.112485886 -3.544958115  
C -1.767562032 3.775218964 -0.672601044  
H -2.674723387 3.181641817 -0.498515546  
H -1.308290601 4.003609180 0.299211532  
H -2.066266060 4.724533558 -1.133285642  
Na 0.408461392 -1.606684685 0.829969108  
Na -1.004237771 1.041412473 1.151660681  
Na 1.557675004 0.883447886 -0.437092423  
Na -0.973895073 -0.337853879 -1.536162019

Na<sub>4</sub>(O<sup>t</sup>Bu)<sub>3</sub>Cl

O 0.969684064 -1.173437715 -1.390743852  
O -1.759112716 -0.940292954 0.510925591  
O -0.639356256 1.725764632 -1.138184190  
C 1.643148541 -2.040107012 -2.261236668  
C -2.915855885 -1.668358922 0.816769183  
C -1.052660346 2.759841204 -1.986531377  
C 1.174525023 -3.494141340 -2.029352665  
H 0.085036576 -3.555149555 -2.138421059  
H 1.631556392 -4.204178810 -2.728424311  
H 1.431963563 -3.819002390 -1.012291908  
C 3.165338278 -1.959056497 -2.017521381  
H 3.732379436 -2.658326149 -2.643121481

H 3.529296160 -0.945934653 -2.233600378  
H 3.384995699 -2.176835060 -0.966171324  
C 1.346472979 -1.651399612 -3.727601528  
H 0.273022145 -1.751728892 -3.937880039  
H 1.626086831 -0.605267584 -3.898766279  
H 1.886441231 -2.274644613 -4.450251579  
C -2.643260002 -3.182567596 0.671281576  
H -1.876094103 -3.498413086 1.390818000  
H -3.535264492 -3.794420004 0.849612772  
H -2.273654222 -3.400542498 -0.338042617  
C -4.059999466 -1.274647474 -0.144943506  
H -5.003473759 -1.781851292 0.088169068  
H -4.229777336 -0.192646220 -0.096384898  
H -3.795389175 -1.533099294 -1.180056572  
C -3.359680653 -1.375113726 2.266093016  
H -3.620563507 -0.314095348 2.372928619  
H -4.231602669 -1.966030955 2.570547819  
H -2.535327673 -1.591322780 2.954515934  
C -0.044931516 3.927963257 -1.923490882  
H -0.350721151 4.786956310 -2.532187939  
H 0.067405030 4.258140087 -0.885244668  
H 0.938802361 3.598413229 -2.284347057  
C -1.137984753 2.253081560 -3.445616722  
H -1.910135508 1.475409508 -3.535912752  
H -1.394464850 3.047953606 -4.155652523  
H -0.177881390 1.819015980 -3.749955654  
C -2.444633961 3.273046970 -1.556064248  
H -3.162166119 2.443353176 -1.556893826  
H -2.394800663 3.681847572 -0.538666844  
H -2.830032349 4.060492516 -2.214368105  
Na 0.380806029 -1.596329570 0.753051281  
Na -1.190356374 1.181570768 0.961914718  
Na 1.456290960 0.953578293 -0.843378305  
Na -1.139522076 -0.429204643 -1.604492307  
Cl 1.307478905 0.673611879 1.818783402

HO<sup>t</sup>Bu

C -21.555721283 -1.699572444 -19.230556488  
H -22.597122192 -1.637131691 -18.901752472  
H -21.118343353 -2.624299049 -18.839317322  
H -21.007150650 -0.858157396 -18.789731979  
C -21.481542587 -1.649790287 -20.764024734  
C -20.021774292 -1.677162051 -21.240596771  
H -19.459196091 -0.837935865 -20.813085556  
H -19.520381927 -2.602298498 -20.937166214  
H -19.979530334 -1.596503496 -22.330692291  
C -22.276527405 -2.800421000 -21.383842468  
H -22.244201660 -2.734640598 -22.475185394  
H -21.866252899 -3.767574072 -21.076719284  
H -23.322649002 -2.746142864 -21.069040298  
O -22.125486374 -0.458086848 -21.240865707  
H -21.639410019 0.298592925 -20.886251450

NaCl



|                                                |              |              |               |   |              |              |              |
|------------------------------------------------|--------------|--------------|---------------|---|--------------|--------------|--------------|
| Na                                             | 1.192735195  | 0.000000000  | -2.017268181  | H | -2.724562645 | 1.171462893  | -0.668248653 |
| Cl                                             | 1.192735195  | 0.000000000  | -4.395284176  | C | 3.705262423  | 2.505665064  | 0.817378759  |
| =====                                          |              |              |               |   |              |              |              |
| 1,4-dioxane                                    |              |              |               |   |              |              |              |
| =====                                          |              |              |               |   |              |              |              |
| O                                              | 3.157814503  | -2.255627155 | -12.408392906 | C | 6.254014492  | 2.582592726  | 0.734436572  |
| C                                              | 3.841135502  | -1.961079478 | -11.193913460 | C | 6.188695431  | 2.889739513  | -0.768492401 |
| C                                              | 2.050898790  | -3.118193150 | -12.167328835 | C | 4.939086914  | 2.253767729  | -1.392798185 |
| C                                              | 2.885940075  | -1.334055066 | -10.182856560 | C | 3.654820442  | 2.750958920  | -0.706618309 |
| H                                              | 4.657255173  | -1.277476192 | -11.448001862 | H | 3.693322897  | 1.417611480  | 0.978672683  |
| H                                              | 4.271753311  | -2.881524324 | -10.763943672 | H | 5.028914928  | 2.779063702  | 2.514659166  |
| O                                              | 1.780295134  | -2.199944735 | -9.939759254  | H | 4.952444553  | 4.162443161  | 1.429513097  |
| H                                              | 3.381622314  | -1.171785831 | -9.219740868  | H | 7.136499405  | 3.049241543  | 1.188794255  |
| H                                              | 2.532974482  | -0.362932533 | -10.568560600 | H | 6.362942696  | 1.497451067  | 0.878214478  |
| C                                              | 1.096184969  | -2.492690802 | -11.154674530 | H | 6.147291660  | 3.977982044  | -0.916243374 |
| H                                              | 0.280835807  | -3.180349827 | -10.906031609 | H | 4.886057854  | 2.478906155  | -2.464616060 |
| H                                              | 0.664576054  | -1.572197199 | -11.580998421 | H | 5.006040573  | 1.159200311  | -1.302157998 |
| H                                              | 1.556414008  | -3.277246237 | -13.131069183 | H | 2.790805101  | 2.238054514  | -1.142085195 |
| H                                              | 2.400562286  | -4.091546059 | -11.783033371 | H | 3.532263041  | 3.818164349  | -0.909473777 |
| =====                                          |              |              |               |   |              |              |              |
| <b>Ligand(L1, L2, L3, L4)_(dihedral angle)</b> |              |              |               |   |              |              |              |
| =====                                          |              |              |               |   |              |              |              |
| L1_0                                           |              |              |               |   |              |              |              |
| =====                                          |              |              |               |   |              |              |              |
| C                                              | 2.075366497  | 4.571818829  | 4.662283897   | H | -0.125674680 | 3.236408234  | 4.193175316  |
| C                                              | 3.182144403  | 5.420305252  | 4.942599773   | C | -1.456373334 | 4.821344852  | 3.643587589  |
| C                                              | 2.942752838  | 6.711552143  | 5.402395248   | C | -1.150694013 | 3.830049515  | 5.966577530  |
| C                                              | 1.649950147  | 7.208320141  | 5.596538067   | H | -0.454796225 | 3.320198298  | 6.641125202  |
| C                                              | 0.575037658  | 6.365109921  | 5.322066307   | H | -1.509953976 | 4.732776642  | 6.472569942  |
| C                                              | 0.754869819  | 5.059161186  | 4.859428883   | H | -2.010489225 | 3.170741081  | 5.801244736  |
| C                                              | 2.309252977  | 3.085919619  | 4.562296391   | H | -1.875757217 | 5.751630783  | 4.039638996  |
| C                                              | 2.342385530  | 2.331937551  | 3.372956991   | H | -2.291507721 | 4.141339302  | 3.438653708  |
| C                                              | 2.535864353  | 0.940554976  | 3.443900108   | H | -0.962136984 | 5.066474438  | 2.697376728  |
| C                                              | 2.690139532  | 0.290411890  | 4.664216042   | C | 4.612171650  | 4.929129124  | 4.753994465  |
| C                                              | 2.653223038  | 1.032796502  | 5.846465111   | H | 4.564419270  | 3.975002766  | 4.222068310  |
| C                                              | 2.461118221  | 2.409689188  | 5.787684917   | C | 5.296611309  | 4.669800758  | 6.108783722  |
| H                                              | 3.786549568  | 7.367753506  | 5.597760201   | C | 5.442126274  | 5.891835690  | 3.886551380  |
| H                                              | -0.436195701 | 6.733905315  | 5.455955029   | H | 4.906988621  | 6.143089771  | 2.967396021  |
| P                                              | 2.196841002  | 3.156354666  | 1.730471015   | H | 5.652846813  | 6.830672264  | 4.409642220  |
| C                                              | 0.779342055  | 2.232754469  | 0.880951166   | H | 6.403851032  | 5.436480045  | 3.623639822  |
| C                                              | 0.177636936  | 3.071284294  | -0.264941126  | H | 5.337537289  | 5.588159561  | 6.704914570  |
| C                                              | -0.884171188 | 2.275990963  | -1.041111112  | H | 6.323311329  | 4.314764977  | 5.962834358  |
| C                                              | -1.999213815 | 1.776490092  | -0.111094050  | H | 4.755312920  | 3.914981365  | 6.688264370  |
| C                                              | -1.415199161 | 0.972358167  | 1.059808016   | C | 1.451229930  | 8.619091988  | 6.126215458  |
| C                                              | -0.351903170 | 1.779076576  | 1.826081395   | H | 2.368759394  | 9.176459312  | 5.896916866  |
| H                                              | 1.245308638  | 1.330746293  | 0.455238730   | C | 1.285727859  | 8.587986946  | 7.659165382  |
| H                                              | 0.950921834  | 3.434422970  | -0.945081651  | C | 0.285678685  | 9.359951019  | 5.453456402  |
| H                                              | -0.284529626 | 3.963411331  | 0.177610576   | H | 0.382079154  | 9.321876526  | 4.365309715  |
| H                                              | -1.300086975 | 2.901316404  | -1.840286493  | H | -0.681893945 | 8.924115181  | 5.728571892  |
| H                                              | -0.404825658 | 1.416561842  | -1.532742500  | H | 0.270897806  | 10.407535553 | 5.773728848  |
| H                                              | -2.548308372 | 2.641849279  | 0.287069321   | H | 0.385196745  | 8.027085304  | 7.936211109  |
| H                                              | -2.210245132 | 0.665997088  | 1.750546455   | H | 1.189638138  | 9.602682114  | 8.061804771  |
| H                                              | -0.959382176 | 0.047638711  | 0.676237643   | H | 2.141863346  | 8.105750084  | 8.143273354  |
| H                                              | 0.038984407  | 1.183007598  | 2.655170918   | H | 2.422767162  | 2.992083549  | 6.703682899  |
| H                                              | -0.825020730 | 2.664927006  | 2.262522221   | H | 2.769248486  | 0.541034520  | 6.808202267  |
|                                                |              |              |               | H | 2.835088491  | -0.785767794 | 4.692822456  |
|                                                |              |              |               | H | 2.557316303  | 0.353458792  | 5.529695749  |
|                                                |              |              |               | C | 2.535828114  | 5.931178093  | 0.225318909  |
|                                                |              |              |               | C | 3.886300087  | 6.226261616  | 0.013380138  |
|                                                |              |              |               | C | 1.627118826  | 6.037289619  | -0.828377545 |
|                                                |              |              |               | C | 4.335676670  | 6.557811737  | -1.268885374 |
|                                                |              |              |               | C | 2.084833384  | 6.363506317  | -2.109785557 |

C 3.439426661 6.609337807 -2.338106871  
H 4.593368530 6.210810661 0.835142314  
H 0.568164647 5.881156445 -0.661470890  
H 5.388707161 6.779561043 -1.425810695  
H 1.372722387 6.433160782 -2.928763866  
H 3.790338516 6.860648155 -3.335395336  
Cl 1.637131453 7.778410435 2.380534410

=====  
L1\_10  
=====

C 1.702461600 4.479770660 4.672443390  
C 2.730265379 5.398438454 5.032013416  
C 2.372973442 6.660875320 5.498396397  
C 1.040407419 7.065623283 5.615316391  
C 0.044781897 6.157674789 5.256434441  
C 0.343125790 4.875598431 4.790853024  
C 2.054960251 3.016587496 4.569783688  
C 2.342330217 2.305922508 3.386857033  
C 2.706763029 0.950305402 3.464946508  
C 2.793281078 0.292795390 4.687551498  
C 2.499335051 0.989083886 5.861030579  
C 2.135471821 2.330332518 5.795019627  
H 3.155736446 7.368159771 5.758325577  
H -0.996105254 6.455432892 5.328184128  
P 2.162702322 3.117395401 1.740644574  
C 0.857480526 2.082365274 0.839426696  
C 0.197488248 2.899547100 -0.289557904  
C -0.766857028 2.034055710 -1.116496682  
C -1.837716460 1.382539868 -0.229900658  
C -1.190399289 0.589129269 0.914717197  
C -0.234158903 1.469220281 1.738847256  
H 1.425368667 1.253631353 0.389730096  
H 0.947802603 3.354195356 -0.940237641  
H -0.355241179 3.729789734 0.170144692  
H -1.233164072 2.647099972 -1.897157073  
H -0.194543451 1.249912739 -1.633817554  
H -2.477917910 2.168447018 0.196169108  
H -1.959080815 0.167243436 1.573653340  
H -0.631695211 -0.262250185 0.498856515  
H 0.205630094 0.884131253 2.551322699  
H -0.810903251 2.277078390 2.199381351  
H -2.489543676 0.733353138 -0.826759100  
C 3.742808580 2.599792719 0.864348769  
C 4.957524776 3.264396429 1.542480588  
C 6.277343273 2.882063866 0.853911817  
C 6.229882240 3.185339689 -0.650762975  
C 5.052077770 2.454099894 -1.310235858  
C 3.714181662 2.847273827 -0.660001636  
H 3.822213888 1.513492823 1.016582012  
H 4.991585732 2.979094744 2.599971771  
H 4.833284378 4.350722313 1.510909796  
H 7.107116222 3.416514635 1.332250834  
H 6.468254089 1.808703065 1.001103997  
H 6.107357502 4.267008305 -0.800393999  
H 5.011431217 2.677760124 -2.382900238  
H 5.202477455 1.367851615 -1.218350887  
H 2.904966831 2.270279408 -1.120762467

H 3.514637470 3.901595831 -0.864607632  
H 7.174733639 2.899579048 -1.128574729  
Pd 1.816158056 5.400666237 2.100089550  
C -0.794893622 3.915003777 4.473613739  
H -0.352238208 2.994161367 4.086050987  
C -1.729032874 4.481083870 3.388345718  
C -1.573711753 3.536239147 5.746879101  
H -0.910179198 3.083261490 6.491353512  
H -2.038290977 4.417063713 6.203780174  
H -2.368439674 2.817894697 5.515219688  
H -2.239503622 5.387594700 3.729736805  
H -2.499977827 3.747931719 3.121790409  
H -1.166536450 4.742872238 2.485790968  
C 4.202774525 5.012791634 4.943974018  
H 4.263996601 4.059253216 4.413159847  
C 4.805017948 4.799560070 6.345538139  
C 5.020476341 6.035158157 4.135087967  
H 4.547641277 6.232854843 3.169484854  
H 5.107439041 6.992870808 4.659143448  
H 6.034953594 5.658079624 3.961776733  
H 4.742118359 5.717868805 6.940102577  
H 5.860689640 4.513592243 6.274601460  
H 4.274553299 4.010111332 6.887853146  
C 0.707759380 8.447333336 6.154428482  
H 1.614679098 9.057023048 6.050679684  
C 0.363942236 8.360232353 7.655027390  
C -0.408861995 9.149805069 5.366057873  
H -0.179453045 9.157705307 4.297544956  
H -1.375604272 8.652298927 5.505821228  
H -0.522858918 10.182434082 5.714159966  
H -0.531406641 7.746134281 7.808588028  
H 0.166090995 9.355766296 8.068186760  
H 1.181709290 7.907274723 8.225970268  
H 1.912887096 2.877842188 6.706387043  
H 2.555595160 0.489579886 6.824285030  
H 3.079737902 -0.754466355 4.723359585  
H 2.913753986 0.394279689 2.554919720  
C 2.376289606 5.937465668 0.258067578  
C 3.698493242 6.353087902 0.071281284  
C 1.480541468 5.965326309 -0.811824083  
C 4.140161037 6.723630428 -1.202093959  
C 1.930926204 6.332169056 -2.085103512  
C 3.262863636 6.695746899 -2.287755966  
H 4.387217045 6.404708385 0.907324314  
H 0.436726063 5.715242386 -0.663545430  
H 5.171695709 7.039495945 -1.339190125  
H 1.230681419 6.339479446 -2.917186260  
H 3.608732462 6.977653980 -3.278527737  
Cl 1.385648966 7.710513592 2.419522047

=====  
L1\_20  
=====

C 1.371932745 4.355453491 4.643371105  
C 2.335379601 5.317538738 5.067473412  
C 1.890654325 6.543814659 5.559509754  
C 0.536404192 6.875027180 5.627392292  
C -0.394804806 5.928909779 5.195203781

C -0.009960245 4.677959919 4.713901043  
C 1.820067048 2.918130875 4.530454636  
C 2.350934505 2.302478552 3.379427671  
C 2.874309778 1.000855923 3.473933458  
C 2.886814356 0.310258090 4.681297779  
C 2.340069532 0.907311738 5.817854881  
C 1.819320798 2.195066214 5.736535549  
H 2.622797728 7.282129765 5.873605728  
H -1.452343225 6.172137737 5.228253365  
P 2.135669708 3.100058556 1.733475924  
C 0.936585486 1.960073948 0.809066474  
C 0.203113616 2.729240894 -0.307713091  
C -0.663829327 1.786977410 -1.158529997  
C -1.661861420 1.005287886 -0.292416662  
C -0.936780334 0.254740268 0.834452033  
C -0.083623663 1.210367322 1.687263489  
H 1.589589953 1.206883311 0.343028247  
H 0.909769595 3.266903400 -0.943821251  
H -0.432947874 3.491798401 0.160826430  
H -1.190377951 2.365876913 -1.926804543  
H -0.011263086 1.079692602 -1.691251993  
H -2.381506443 1.708865285 0.150476500  
H -1.657847881 -0.264974773 1.477058053  
H -0.288726479 -0.520098388 0.399214029  
H 0.416833878 0.655979514 2.486373901  
H -0.746288657 1.937409639 2.165811539  
H -2.241314888 0.307035446 -0.908182919  
C 3.762334585 2.710260630 0.875834405  
C 4.917156696 3.450858355 1.579146743  
C 6.270974636 3.161756516 0.911271751  
C 6.228713036 3.472193003 -0.592219472  
C 5.111575127 2.672090530 -1.277483463  
C 3.740289688 2.970121145 -0.646739781  
H 3.918147326 1.630079746 1.012814760  
H 4.952040672 3.163357019 2.636163473  
H 4.720213413 4.526500702 1.551009774  
H 7.055757046 3.746289492 1.406477928  
H 6.529769897 2.102231979 1.055279613  
H 6.039611816 4.544783592 -0.736913562  
H 5.074096203 2.903476238 -2.348627329  
H 5.331645489 1.597156882 -1.193000078  
H 2.978079319 2.345975161 -1.126043320  
H 3.474650145 4.009917736 -0.846521318  
H 7.197801113 3.251434565 -1.055669308  
Pd 1.658213854 5.357738495 2.115408659  
C -1.077280283 3.674658775 4.302928448  
H -0.563919067 2.771529198 3.963354349  
C -1.922001600 4.208578110 3.131310463  
C -1.961881638 3.266060352 5.494647980  
H -1.358154774 2.847600460 6.307033539  
H -2.511746407 4.124815941 5.895271301  
H -2.695416451 2.511023045 5.189911842  
H -2.493759394 5.095519066 3.423819304  
H -2.636018038 3.449458122 2.789902925  
H -1.283749461 4.494246006 2.288884163  
C 3.831051826 5.018485069 5.036138058  
H 3.976905584 4.096666336 4.467776299  
C 4.365947247 4.770272732 6.458231449

C 4.632843018 6.122138023 4.323206902  
H 4.215159893 6.330416679 3.334587336  
H 4.624632835 7.061610222 4.885692120  
H 5.678024769 5.813120365 4.207409859  
H 4.222452164 5.655406952 7.087911129  
H 5.437013626 4.540093899 6.434548378  
H 3.846883059 3.930811167 6.932662964  
C 0.100120455 8.217222214 6.190698624  
H 0.994392455 8.852025032 6.237420082  
C -0.434572875 8.043326378 7.626474857  
C -0.924378932 8.933364868 5.295451164  
H -0.549860001 9.015830994 4.272056103  
H -1.879410267 8.396071434 5.267521858  
H -1.126913905 9.937715530 5.684008598  
H -1.327063560 7.406093121 7.630385399  
H -0.710207462 9.011499405 8.059789658  
H 0.313155144 7.575896263 8.276467323  
H 1.416822314 2.675449371 6.623847485  
H 2.328915596 0.376608670 6.765752316  
H 3.306182146 -0.690480590 4.730861187  
H 3.267142296 0.510680974 2.588261127  
C 2.196793556 5.948755264 0.281208247  
C 3.487732410 6.454689026 0.096316345  
C 1.306709766 5.910696030 -0.793826163  
C 3.908431292 6.847717285 -1.178212643  
C 1.735751033 6.302600384 -2.067570210  
C 3.040696144 6.755330563 -2.268693209  
H 4.166690826 6.559514523 0.935682595  
H 0.282365113 5.588113308 -0.649459481  
H 4.916368961 7.233345032 -1.312453032  
H 1.039671779 6.257365227 -2.901989698  
H 3.371003389 7.055023670 -3.259428978  
Cl 1.143263698 7.646677971 2.466481686

=====  
L1\_30  
=====

C 0.925336123 4.121969700 4.556853771  
C 1.694840550 5.207214832 5.070331573  
C 1.025536418 6.343102932 5.530769825  
C -0.362032086 6.464674473 5.477845669  
C -1.098318219 5.403488159 4.942425251  
C -0.488620371 4.233615398 4.493546963  
C 1.589329600 2.770950079 4.470870495  
C 2.339373112 2.300330162 3.369805813  
C 3.083178759 1.115172982 3.518348694  
C 3.079336882 0.394244969 4.709571838  
C 2.297165394 0.832564592 5.776669502  
C 1.571102619 2.013776302 5.653194904  
H 1.605805993 7.175038338 5.917478085  
H -2.179273605 5.489385605 4.879233360  
P 2.104745150 3.076776743 1.715230227  
C 0.759988427 2.000324965 0.960161209  
C 1.204192162 0.567708611 0.604837477  
C 0.007470809 -0.265274048 0.111388884  
C -0.689526796 0.409216881 -1.079764843  
C -1.131860495 1.835688114 -0.720827341  
C 0.047382765 2.687332153 -0.222597405

H 0.031052062 1.928609014 1.776965976  
H 1.662468672 0.083657540 1.474000692  
H 1.964342117 0.599201739 -0.186216891  
H 0.344717085 -1.273447037 -0.158335164  
H -0.711755157 -0.383141965 0.934695780  
H 0.007105193 0.448804796 -1.929922819  
H -1.600247860 2.323555946 -1.583957314  
H -1.896532059 1.790090561 0.067559741  
H -0.306218922 3.674084425 0.089456134  
H 0.752587259 2.854775906 -1.045240402  
H -1.549911380 -0.187247664 -1.405835152  
C 3.699244499 2.680041313 0.822131336  
C 4.872686386 3.394119740 1.528529644  
C 6.213626385 3.069230318 0.851322770  
C 6.172783852 3.394668102 -0.648994982  
C 5.023503304 2.646111250 -1.338886976  
C 3.671051264 2.986892462 -0.691073179  
H 3.846609354 1.596185565 0.922573209  
H 4.906615257 3.111074924 2.586834908  
H 4.699645519 4.474133968 1.493656993  
H 7.019074917 3.625461817 1.345956445  
H 6.440624237 2.001020670 0.985720754  
H 6.022147179 4.475043297 -0.780933142  
H 4.987754822 2.896899462 -2.405684233  
H 5.202973843 1.562260032 -1.273716807  
H 2.875097752 2.415776014 -1.180011153  
H 3.451945066 4.042340279 -0.857205212  
H 7.130957603 3.144038439 -1.120081782  
Pd 1.503430247 5.307648659 2.114865303  
C -1.347152472 3.091008425 3.966459990  
H -0.673300862 2.288673401 3.647137165  
C -2.170364618 3.532375336 2.743080854  
C -2.249248505 2.504233599 5.066982269  
H -1.654260397 2.141510963 5.911678791  
H -2.948244810 3.256757975 5.447786331  
H -2.837656021 1.665058017 4.678647041  
H -2.920390368 4.281693459 3.017384529  
H -2.697804213 2.678543568 2.302117109  
H -1.526078224 3.980445385 1.981077433  
C 3.215533733 5.127281189 5.196101189  
H 3.559790850 4.297797203 4.572311401  
C 3.623228788 4.816198349 6.649131775  
C 3.922206640 6.396426201 4.686374664  
H 3.576040268 6.666353226 3.684940338  
H 3.738921881 7.257131100 5.338485241  
H 5.005511761 6.232526302 4.657198429  
H 3.278769493 5.608518600 7.323329926  
H 4.713362217 4.745288372 6.737923145  
H 3.191567183 3.869898558 6.989369869  
C -1.053264141 7.714774609 5.996889114  
H -0.266730756 8.426291466 6.279752731  
C -1.880824327 7.399065495 7.258030415  
C -1.919480681 8.386069298 4.916265011  
H -1.329824686 8.585457802 4.018355846  
H -2.762929916 7.746508598 4.630932808  
H -2.333065748 9.328794479 5.292309761  
H -2.686089277 6.691175938 7.029031277  
H -2.340991735 8.309880257 7.657452106

H -1.259346843 6.955688000 8.043395042  
H 0.993493199 2.387819767 6.493889809  
H 2.268316269 0.271234363 6.706372261  
H 3.673033714 -0.511454701 4.795849323  
H 3.679920435 0.741424382 2.693500996  
C 2.223891020 5.932022572 0.359156758  
C 3.506232262 6.490686417 0.336340785  
C 1.484711051 5.842350483 -0.822506130  
C 4.069495201 6.896435738 -0.878170788  
C 2.054212809 6.252947807 -2.033390045  
C 3.352828264 6.764168739 -2.070024252  
H 4.067034721 6.622637272 1.256113052  
H 0.470953912 5.460523605 -0.813107014  
H 5.069791317 7.323228359 -0.886597991  
H 1.474491477 6.169858932 -2.949767113  
H 3.794060946 7.075527668 -3.012731314  
Cl 0.786864936 7.547534943 2.435978413

=====  
LI\_40  
=====

C 0.627942383 3.860697269 4.513294697  
C 1.328046322 4.972713947 5.069835186  
C 0.586830378 6.070322990 5.516616344  
C -0.800606370 6.128508091 5.412334442  
C -1.464852214 5.041118622 4.836332798  
C -0.784496665 3.907820940 4.395153046  
C 1.381366014 2.561134815 4.392282486  
C 2.310274839 2.280373096 3.361878633  
C 3.177391291 1.184002280 3.521305323  
C 3.127511978 0.369516790 4.650503159  
C 2.167051315 0.610156953 5.630760193  
C 1.317797303 1.706436872 5.502313137  
H 1.110994577 6.922640324 5.935852051  
H -2.545431852 5.078528881 4.730780602  
P 2.060756445 3.055631876 1.705738664  
C 0.818891108 1.888692379 0.921326816  
C 1.372123361 0.487687647 0.597981870  
C 0.246390775 -0.430631846 0.090279527  
C -0.465306163 0.180745319 -1.126201868  
C -1.006863594 1.581753016 -0.805038333  
C 0.103845023 2.512809515 -0.293435007  
H 0.070000574 1.777161598 1.715121150  
H 1.844797492 0.050246369 1.484021664  
H 2.145701647 0.564349353 -0.177209094  
H 0.655941129 -1.417355895 -0.157642260  
H -0.482371509 -0.585801780 0.898881853  
H 0.247025579 0.251162469 -1.961234093  
H -1.481778979 2.023965597 -1.688906312  
H -1.787404537 1.501413226 -0.035451252  
H -0.314058691 3.482934952 -0.011712468  
H 0.821285605 2.705327272 -1.099631548  
H -1.277863264 -0.474651456 -1.461784244  
C 3.701644659 2.789743423 0.845207155  
C 4.799196720 3.590423822 1.580891132  
C 6.176428795 3.383312941 0.930106461  
C 6.142386913 3.720642567 -0.568040431  
C 5.072911263 2.886874676 -1.287292123

C 3.683397055 3.108410358 -0.665933967  
H 3.932285786 1.720107794 0.939356327  
H 4.835753441 3.303777456 2.638154030  
H 4.538510799 4.652608395 1.550641418  
H 6.922458649 3.997621775 1.448546767  
H 6.487199306 2.335702181 1.059157848  
H 5.906461716 4.786212444 -0.694327652  
H 5.037807941 3.144012213 -2.352614164  
H 5.340301037 1.821019411 -1.226974010  
H 2.950335741 2.476658106 -1.178170919  
H 3.379985571 4.143875122 -0.827572167  
H 7.127398491 3.552958965 -1.020105004  
Pd 1.349412560 5.260589123 2.113552570  
C -1.568995357 2.746636152 3.798346758  
H -0.849993527 1.972535014 3.507765055  
C -2.325993538 3.189635277 2.532793522  
C -2.521977901 2.109417677 4.825218678  
H -1.974012733 1.749236822 5.702212334  
H -3.270308495 2.830473900 5.171853065  
H -3.054793119 1.259785056 4.383149624  
H -3.117921591 3.906087875 2.774986029  
H -2.793193102 2.330231905 2.038160801  
H -1.650044799 3.679605007 1.825593591  
C 2.842650414 4.955483437 5.287579060  
H 3.269670010 4.193705559 4.630612850  
C 3.169880867 4.551642895 6.738636017  
C 3.522412777 6.286128521 4.922403812  
H 3.226288080 6.622249603 3.924893856  
H 3.267619133 7.083370209 5.628110409  
H 4.611230373 6.164458752 4.948199272  
H 2.748007774 5.277466774 7.443212032  
H 4.254319191 4.517648697 6.894498348  
H 2.760266066 3.566220522 6.980234623  
C -1.567962050 7.340446949 5.915130138  
H -0.826331615 8.079156876 6.245208740  
C -2.441712856 6.973306656 7.130252838  
C -2.406316757 7.991724968 4.800713062  
H -1.779675364 8.231852531 3.938278198  
H -3.205051184 7.320884705 4.463037968  
H -2.879744530 8.909605980 5.167469978  
H -3.205340862 6.236597538 6.854270935  
H -2.957979679 7.858681202 7.518061638  
H -1.841054916 6.544672489 7.939617634  
H 0.609337986 1.940851212 6.291356564  
H 2.097300529 -0.032057155 6.504186630  
H 3.820229053 -0.461445212 4.748788357  
H 3.903501749 0.948590815 2.751184940  
C 2.045798540 5.948361874 0.376204073  
C 3.277895212 6.610731125 0.376246721  
C 1.333931923 5.801998615 -0.816255689  
C 3.821829081 7.070218086 -0.827670455  
C 1.883137465 6.269406796 -2.016091824  
C 3.134178400 6.889275074 -2.030140162  
H 3.809339762 6.786207199 1.306020141  
H 0.357425749 5.332402229 -0.824145973  
H 4.782953262 7.579019070 -0.819414139  
H 1.326428413 6.143218517 -2.941767693  
H 3.560869455 7.244197369 -2.964118719

Cl 0.567232430 7.467300415 2.502779722

=====  
L1\_50  
=====

C 0.499965042 3.726792812 4.462136745  
C 1.138623357 4.890732765 4.986378193  
C 0.348500073 6.011629581 5.270627975  
C -1.025651693 6.032351017 5.051786423  
C -1.631676078 4.870153904 4.565901279  
C -0.903913736 3.714928389 4.278805256  
C 1.325568318 2.474185705 4.359986782  
C 2.310275078 2.280373096 3.361878633  
C 3.233481884 1.231822729 3.531288147  
C 3.192533493 0.389355958 4.640355587  
C 2.183215618 0.546291947 5.587256908  
C 1.273096919 1.591010332 5.447222710  
H 0.827114940 6.909969807 5.642534733  
H -2.706515312 4.866274357 4.407664776  
P 2.060756445 3.055631876 1.705738783  
C 0.757241309 1.928957582 0.959913313  
C 1.275017858 0.515276670 0.627321780  
C 0.130453825 -0.377243191 0.117248975  
C -0.558578908 0.253960788 -1.101961255  
C -1.089781404 1.655052543 -0.764608383  
C 0.020330269 2.576660872 -0.229688302  
H 0.033448137 1.833085418 1.776417851  
H 1.742887497 0.067488633 1.511374235  
H 2.046226740 0.573074281 -0.151076704  
H 0.519291878 -1.372541189 -0.129692256  
H -0.606423378 -0.516598284 0.921412766  
H 0.164872006 0.325966835 -1.927263856  
H -1.553618312 2.114926338 -1.645437241  
H -1.878284693 1.564736366 -0.005829887  
H -0.405473650 3.533250332 0.090276025  
H 0.725343287 2.805397272 -1.036979437  
H -1.375067711 -0.387321234 -1.454642892  
C 3.663657427 2.703015327 0.805604219  
C 4.820320606 3.474656343 1.479039311  
C 6.164764881 3.161899805 0.803054154  
C 6.106413364 3.447084665 -0.704818904  
C 4.967497349 2.658698797 -1.366736174  
C 3.612882614 2.981133223 -0.713546991  
H 3.850818157 1.627154708 0.920947731  
H 4.870951176 3.241099119 2.548192501  
H 4.616646767 4.546149254 1.402217507  
H 6.959751606 3.750007868 1.277096272  
H 6.417996407 2.103158474 0.964128196  
H 5.932944775 4.520479202 -0.862538815  
H 4.916110992 2.885740757 -2.438222885  
H 5.171666622 1.580708981 -1.280729771  
H 2.828136921 2.381711245 -1.185893536  
H 3.367224932 4.028110504 -0.896708488  
H 7.065780163 3.203947544 -1.177298546  
Pd 1.539162874 5.313688278 2.109820604  
C -1.646440744 2.461347818 3.827373743  
H -0.900572300 1.710597873 3.542929649  
C -2.543778658 2.724837780 2.604867220

|    |              |              |              |    |              |              |              |
|----|--------------|--------------|--------------|----|--------------|--------------|--------------|
| C  | -2.470052719 | 1.861426353  | 4.982716084  | C  | 1.248071671  | 1.488157153  | 5.401464462  |
| H  | -1.834143162 | 1.607030034  | 5.836432457  | H  | 0.554804742  | 6.897534370  | 5.109568596  |
| H  | -3.225542307 | 2.574038267  | 5.330934525  | H  | -2.802826643 | 4.642345905  | 3.760210276  |
| H  | -2.986501217 | 0.950499892  | 4.659451962  | P  | 2.060756445  | 3.055631876  | 1.705738783  |
| H  | -3.383847952 | 3.379743338  | 2.858497381  | C  | 0.713509202  | 1.959355593  | 0.988065362  |
| H  | -2.963979483 | 1.785991430  | 2.226581097  | C  | 1.191172600  | 0.515873134  | 0.724167943  |
| H  | -1.985011458 | 3.206880808  | 1.798112988  | C  | 0.040661078  | -0.357195258 | 0.196614429  |
| C  | 2.612868071  | 4.893712044  | 5.407230854  | C  | -0.562697828 | 0.250471830  | -1.077987432 |
| H  | 3.141620874  | 4.153255463  | 4.802127838  | C  | -1.082109928 | 1.669334888  | -0.805969059 |
| C  | 2.728350163  | 4.458684444  | 6.883443356  | C  | 0.010970582  | 2.590775490  | -0.232400373 |
| C  | 3.326363802  | 6.240176678  | 5.195354462  | H  | -0.018852144 | 1.920606852  | 1.798572183  |
| H  | 3.181109905  | 6.622961521  | 4.182429314  | H  | 1.608809233  | 0.087152556  | 1.642228723  |
| H  | 2.967487812  | 7.006673336  | 5.890649796  | H  | 1.993462443  | 0.514707625  | -0.023611134 |
| H  | 4.399595737  | 6.116298199  | 5.378656387  | H  | 0.406112373  | -1.373741031 | 0.007151762  |
| H  | 2.199566364  | 5.168190479  | 7.530246735  | H  | -0.739489436 | -0.440038353 | 0.967253089  |
| H  | 3.778810501  | 4.432332993  | 7.195262909  | H  | 0.208224460  | 0.282748371  | -1.861858964 |
| H  | 2.300610065  | 3.465786219  | 7.048253059  | H  | -1.485825896 | 2.116183281  | -1.722430229 |
| C  | -1.836394787 | 7.289961815  | 5.317125320  | H  | -1.915735960 | 1.606309772  | -0.095674217 |
| H  | -1.139062881 | 8.053038597  | 5.685358524  | H  | -0.429844469 | 3.546770096  | 0.069748230  |
| C  | -2.902514458 | 7.059452534  | 6.403729916  | H  | 0.738226056  | 2.819697142  | -1.018345594 |
| C  | -2.463896036 | 7.825813770  | 4.016910076  | H  | -1.372834563 | -0.382428110 | -1.459288597 |
| H  | -1.692410588 | 7.991885662  | 3.260255098  | C  | 3.641115665  | 2.629517794  | 0.786966264  |
| H  | -3.194944143 | 7.114990711  | 3.613224745  | C  | 4.834380627  | 3.398996115  | 1.397479177  |
| H  | -2.987063169 | 8.770424843  | 4.204906940  | C  | 6.156213760  | 2.995402575  | 0.725144148  |
| H  | -3.640603542 | 6.315140724  | 6.082643986  | C  | 6.087076187  | 3.203937531  | -0.794759512 |
| H  | -3.442498446 | 7.988479137  | 6.618131161  | C  | 4.905594349  | 2.432839870  | -1.399435043 |
| H  | -2.451602936 | 6.702404022  | 7.335771084  | C  | 3.575149059  | 2.839618921  | -0.742820442 |
| H  | 0.523605585  | 1.763333321  | 6.213431835  | H  | 3.802721739  | 1.555445194  | 0.946938574  |
| H  | 2.119942427  | -0.119367994 | 6.443380356  | H  | 4.893881321  | 3.238094807  | 2.479011774  |
| H  | 3.930815935  | -0.400589854 | 4.745213509  | H  | 4.669227123  | 4.468922615  | 1.252803564  |
| H  | 3.996835232  | 1.051400542  | 2.783579350  | H  | 6.980334759  | 3.575658560  | 1.157281160  |
| C  | 2.167462349  | 5.914456367  | 0.316943824  | H  | 6.370305061  | 1.937289000  | 0.939262092  |
| C  | 3.425216913  | 6.516846657  | 0.212979212  | H  | 5.956844807  | 4.274419785  | -1.005323291 |
| C  | 1.365762830  | 5.772735119  | -0.817546427 | H  | 4.844981670  | 2.610079527  | -2.479859591 |
| C  | 3.907618046  | 6.906532288  | -1.040651917 | H  | 5.067451954  | 1.352680206  | -1.264514804 |
| C  | 1.854693770  | 6.170809269  | -2.067527056 | H  | 2.763015270  | 2.248799086  | -1.176841497 |
| C  | 3.132210732  | 6.720133305  | -2.187752008 | H  | 3.366305828  | 3.885824680  | -0.971892297 |
| H  | 4.023789406  | 6.698938370  | 1.099185228  | H  | 7.027719498  | 2.895835638  | -1.267077088 |
| H  | 0.368033022  | 5.357821941  | -0.742753029 | Pd | 1.732207775  | 5.351700306  | 2.098529816  |
| H  | 4.890126228  | 7.366762638  | -1.114405990 | C  | -1.693692207 | 2.183004379  | 3.728345633  |
| H  | 1.228856444  | 6.045799255  | -2.948049068 | H  | -0.922566533 | 1.441424727  | 3.490627289  |
| H  | 3.511244774  | 7.020573616  | -3.160543919 | C  | -2.662364006 | 2.266278982  | 2.535620451  |
| Cl | 1.038432598  | 7.608602524  | 2.515886307  | C  | -2.443965435 | 1.675122380  | 4.976038933  |

=====  
L1\_60  
=====

|   |              |             |             |   |              |             |             |
|---|--------------|-------------|-------------|---|--------------|-------------|-------------|
| C | 0.370314717  | 3.577704430 | 4.351673603 | H | -2.972030401 | 1.263695955 | 2.220813990 |
| C | 0.935836434  | 4.805900574 | 4.814200878 | H | -2.206059933 | 2.773724556 | 1.681967616 |
| C | 0.125970185  | 5.949504375 | 4.810719490 | C | 2.302966356  | 4.844637871 | 5.514442444 |
| C | -1.204450011 | 5.921189308 | 4.390826225 | H | 2.950281382  | 4.098558903 | 5.045718193 |
| C | -1.755269766 | 4.686703682 | 4.042595387 | C | 2.120686293  | 4.447632313 | 6.996403217 |
| C | -1.000573277 | 3.509114265 | 4.025549412 | C | 3.038159609  | 6.192469597 | 5.434228897 |
| C | 1.277965665  | 2.383584023 | 4.324747086 | H | 3.111677647  | 6.566633701 | 4.411288261 |
| C | 2.310275078  | 2.280373096 | 3.361878633 | H | 2.536098480  | 6.963166237 | 6.029377460 |
| C | 3.305807590  | 1.306043029 | 3.565050840 | H | 4.048192501  | 6.078170300 | 5.843030930 |
| C | 3.290812731  | 0.456685483 | 4.670365334 | H | 1.465634465  | 5.167368889 | 7.500670910 |
| C | 2.235083342  | 0.520798922 | 5.575914860 | H | 3.087393284  | 4.448368073 | 7.512756348 |

|    |              |              |              |    |              |              |              |
|----|--------------|--------------|--------------|----|--------------|--------------|--------------|
| H  | 1.679737926  | 3.453999281  | 7.105866909  | H  | -1.618880868 | 2.698235273  | -1.753181100 |
| C  | -2.010322809 | 7.205801010  | 4.292939186  | H  | -1.746066570 | 1.662045002  | -0.330540597 |
| H  | -1.383893251 | 8.012075424  | 4.694206715  | H  | -0.449802995 | 3.675436258  | 0.225421265  |
| C  | -3.301805019 | 7.150906563  | 5.126855373  | H  | 0.684283674  | 3.371117115  | -1.085632563 |
| C  | -2.301064968 | 7.541664124  | 2.817235470  | H  | -1.214700818 | 0.278806567  | -2.326906204 |
| H  | -1.366610527 | 7.621477604  | 2.254379988  | C  | 3.587182999  | 3.281199694  | 0.952381015  |
| H  | -2.922757387 | 6.763907433  | 2.356711864  | C  | 3.440327406  | 4.116954327  | -0.337216973 |
| H  | -2.839486599 | 8.493231773  | 2.738285065  | C  | 4.817363262  | 4.612380028  | -0.810953021 |
| H  | -3.989632368 | 6.384539127  | 4.750946999  | C  | 5.801380157  | 3.446829796  | -1.003506541 |
| H  | -3.826840639 | 8.111513138  | 5.084264278  | C  | 5.915103436  | 2.589669704  | 0.267814547  |
| H  | -3.088986635 | 6.923614025  | 6.176868439  | C  | 4.534296989  | 2.083704710  | 0.722925901  |
| H  | 0.453850478  | 1.587174892  | 6.133848667  | H  | 4.053963184  | 3.938319206  | 1.698009849  |
| H  | 2.191212177  | -0.155970812 | 6.424494267  | H  | 2.765814781  | 4.964272976  | -0.166713521 |
| H  | 4.087016106  | -0.270872146 | 4.800281525  | H  | 2.989626408  | 3.500605345  | -1.126277208 |
| H  | 4.107853889  | 1.184002161  | 2.847980022  | H  | 4.708369255  | 5.180061340  | -1.742588043 |
| C  | 2.306301117  | 5.866930962  | 0.259501159  | H  | 5.220444679  | 5.310503006  | -0.063165188 |
| C  | 3.579978704  | 6.410669327  | 0.065651134  | H  | 5.449696064  | 2.813008547  | -1.830726862 |
| C  | 1.434180856  | 5.730930328  | -0.822374523 | H  | 6.586094379  | 1.739132762  | 0.096995644  |
| C  | 4.004823685  | 6.740717411  | -1.225172639 | H  | 6.364675522  | 3.188729286  | 1.073165894  |
| C  | 1.865361691  | 6.070342541  | -2.110405445 | H  | 4.627603531  | 1.475801349  | 1.628530383  |
| C  | 3.156587839  | 6.556435585  | -2.320151567 | H  | 4.125656605  | 1.429084420  | -0.053080127 |
| H  | 4.233592033  | 6.596506119  | 0.910982132  | H  | 6.787370682  | 3.826222181  | -1.296986580 |
| H  | 0.425952315  | 5.363521099  | -0.677406251 | Pd | 0.812720776  | 4.985227585  | 2.294421196  |
| H  | 5.000080585  | 7.154595375  | -1.368755579 | C  | 1.265741587  | -1.319204450 | 3.137228251  |
| H  | 1.183695197  | 5.948910713  | -2.948876143 | H  | 2.127269268  | -0.648091197 | 3.199711084  |
| H  | 3.491375208  | 6.811017036  | -3.321784019 | C  | 1.517308235  | -2.280969143 | 1.963130951  |
| Cl | 1.486200690  | 7.706398487  | 2.463048697  | C  | 1.204521060  | -2.115321398 | 4.457365513  |

=====  
LI\_70  
=====

|   |              |              |              |   |              |              |              |
|---|--------------|--------------|--------------|---|--------------|--------------|--------------|
| C | -0.045993049 | 0.884196937  | 3.431237459  | H | 1.114297628  | -1.452405810 | 5.321403503  |
| C | -1.261336923 | 1.600929976  | 3.368022680  | H | 0.340475887  | -2.789597988 | 4.456270695  |
| C | -2.375867605 | 0.983685315  | 2.785550594  | H | 2.108904600  | -2.720763445 | 4.586860657  |
| C | -2.334430695 | -0.319135517 | 2.289833546  | H | 0.777694225  | -3.088259459 | 1.929183245  |
| C | -1.139275193 | -1.032067060 | 2.421937227  | H | 2.500399113  | -2.751337767 | 2.071870804  |
| C | 0.006817552  | -0.463131636 | 2.983170748  | H | 1.490569711  | -1.768124342 | 0.999053955  |
| C | 1.203285336  | 1.466019034  | 4.037790298  | C | -1.387999654 | 3.009176016  | 3.933361769  |
| C | 2.312993288  | 2.022165060  | 3.325802803  | H | -0.401417792 | 3.480981112  | 3.845313549  |
| C | 3.510917425  | 2.295352221  | 3.997545958  | C | -1.756144881 | 2.980283976  | 5.429199696  |
| C | 3.659796953  | 2.014981747  | 5.356089115  | C | -2.378214121 | 3.897430420  | 3.162148476  |
| C | 2.583322763  | 1.499673009  | 6.071342468  | H | -2.211348295 | 3.838117599  | 2.080840826  |
| C | 1.383804798  | 1.225538731  | 5.410436153  | H | -3.418661118 | 3.612907410  | 3.357512712  |
| H | -3.306619406 | 1.537444115  | 2.711177111  | H | -2.249167919 | 4.942324162  | 3.455302715  |
| H | -1.099561691 | -2.059384346 | 2.072978497  | H | -2.720832586 | 2.481818914  | 5.579225063  |
| P | 1.931494236  | 2.937870264  | 1.740540981  | H | -1.836965561 | 4.002166271  | 5.816464901  |
| C | 0.857731044  | 1.952476025  | 0.570283055  | H | -1.005373836 | 2.450770378  | 6.021413803  |
| C | 1.526196003  | 0.828186035  | -0.238317072 | C | -3.558818817 | -0.947736979 | 1.640627861  |
| C | 0.448248804  | -0.003888642 | -0.956213295 | H | -4.346840382 | -0.183322951 | 1.622332454  |
| C | -0.424954385 | 0.880165994  | -1.860394359 | C | -4.082151413 | -2.140349627 | 2.462610245  |
| C | -1.043304682 | 2.051684141  | -1.080472112 | C | -3.279402494 | -1.360585093 | 0.183125034  |
| C | 0.032612529  | 2.877423286  | -0.354051322 | H | -2.934738398 | -0.507974386 | -0.410904706 |
| H | 0.142321035  | 1.486609340  | 1.247431397  | H | -2.506601572 | -2.136099815 | 0.131857410  |
| H | 2.132628441  | 0.192554876  | 0.415059596  | H | -4.184242725 | -1.761761546 | -0.286897689 |
| H | 2.203340769  | 1.259634256  | -0.986175835 | H | -3.338233232 | -2.944077730 | 2.506169081  |
| H | 0.919399500  | -0.803173900 | -1.541707277 | H | -4.992960930 | -2.552570820 | 2.014139891  |
| H | -0.184706852 | -0.489891231 | -0.202512100 | H | -4.310744762 | -1.841164470 | 3.490421295  |
| H | 0.191134319  | 1.278544903  | -2.679710150 | H | 0.562466085  | 0.781833410  | 5.964372635  |
|   |              |              |              | H | 2.671754837  | 1.301278234  | 7.135628223  |
|   |              |              |              | H | 4.600447178  | 2.237563133  | 5.849959373  |
|   |              |              |              | H | 4.330955982  | 2.776472330  | 3.478437185  |
|   |              |              |              | C | 2.167935371  | 5.349193096  | 3.686281204  |

C 1.857432842 5.068482876 5.017444134  
C 3.400090933 5.906527042 3.338195086  
C 2.813548326 5.319375038 6.006472111  
C 4.351053715 6.142430782 4.338585854  
C 4.062942505 5.845946312 5.671915531  
H 0.895519853 4.650628090 5.292385578  
H 3.620909691 6.167557240 2.307852030  
H 2.576224804 5.093011379 7.042848110  
H 5.313814640 6.569684505 4.068441391  
H 4.802192688 6.033893585 6.445501328  
Cl -0.364222795 6.984738827 2.635860205

=====  
L1\_80  
=====

C -0.057960343 0.903192341 3.339745283  
C -1.218280673 1.708349586 3.336935997  
C -2.372528315 1.223582745 2.706819057  
C -2.418948889 -0.031229055 2.099762678  
C -1.273354411 -0.832130790 2.163026571  
C -0.092169613 -0.396450669 2.768971205  
C 1.218716264 1.372277856 3.979928732  
C 2.312993050 2.022165060 3.325802803  
C 3.511734009 2.252180576 4.006413460  
C 3.666072130 1.850540519 5.332919598  
C 2.605279446 1.246069670 6.001428604  
C 1.406761646 1.011664867 5.325011730  
H -3.261729479 1.846122742 2.681322575  
H -1.302145600 -1.821631908 1.717934728  
P 1.931494355 2.937870264 1.740540862  
C 0.800855458 2.063235760 0.532204688  
C 1.415747166 0.949477494 -0.330699295  
C 0.309307039 0.241407588 -1.132796049  
C -0.476498187 1.238130569 -1.998820782  
C -1.041705132 2.392999411 -1.157264709  
C 0.062587537 3.097722054 -0.351714283  
H 0.042879373 1.610888004 1.167647958  
H 1.955248356 0.232701451 0.296014309  
H 2.144222260 1.379099250 -1.029171348  
H 0.747157633 -0.546669126 -1.757930279  
H -0.377810806 -0.249333024 -0.431769222  
H 0.188286766 1.648826838 -2.772719145  
H -1.555909276 3.118876219 -1.797963619  
H -1.788252592 2.003122807 -0.451617926  
H -0.387273222 3.885077238 0.267144114  
H 0.763492703 3.595115900 -1.032888770  
H -1.288444638 0.721617043 -2.525108576  
C 3.601779938 3.210468769 0.954748034  
C 3.517146826 4.091082573 -0.309936374  
C 4.925623417 4.521534443 -0.752823949  
C 5.841424465 3.306691885 -0.969265759  
C 5.895584583 2.412314415 0.279456377  
C 4.486711979 1.970073104 0.712218583  
H 4.097311020 3.823971510 1.718294263  
H 2.891986609 4.971341133 -0.117381126  
H 3.041302919 3.529217482 -1.124385595  
H 4.861654282 5.122389793 -1.667730927  
H 5.358943939 5.172092915 0.020670781

H 5.459980965 2.716346741 -1.815408707  
H 6.522387505 1.531953812 0.092259504  
H 6.369312763 2.965879440 1.103360772  
H 4.540031910 1.348793387 1.612341404  
H 4.053049088 1.346647501 -0.076103240  
H 6.850306511 3.634883404 -1.246547222  
Pd 0.991289258 5.071361065 2.301202059  
C 1.111540675 -1.338092208 2.841190815  
H 2.015147686 -0.722312570 2.899641752  
C 1.258989453 -2.264691830 1.621524334  
C 1.048055053 -2.198038816 4.121702194  
H 1.052383423 -1.583067775 5.023388863  
H 0.134158403 -2.803193331 4.127122402  
H 1.906501055 -2.877456427 4.171647549  
H 0.481656462 -3.036482573 1.602158666  
H 2.222990274 -2.782632589 1.664432049  
H 1.207834363 -1.719051361 0.677338541  
C -1.238943696 3.075853109 4.009356976  
H -0.221526429 3.480671883 3.953305721  
C -1.605546951 2.952498198 5.501288414  
C -2.167680502 4.088026047 3.317785740  
H -2.016777515 4.096530437 2.232676506  
H -3.224162817 3.864872694 3.507015705  
H -1.962790966 5.098257542 3.681461573  
H -2.603651524 2.514488697 5.617722034  
H -1.611626387 3.941995144 5.972195625  
H -0.893568516 2.322819233 6.041656971  
C -3.684266567 -0.523326397 1.411547065  
H -4.419641018 0.290680617 1.459353328  
C -4.282226086 -1.738672733 2.145121574  
C -3.440718889 -0.844397664 -0.074849084  
H -3.045800209 0.024799207 -0.609829605  
H -2.721184731 -1.662694216 -0.191536248  
H -4.372795105 -1.150516987 -0.562717974  
H -3.594789505 -2.591803551 2.115288496  
H -5.222770691 -2.051065683 1.677628160  
H -4.481382847 -1.506764770 3.196162701  
H 0.590429366 0.518649817 5.843667030  
H 2.705495834 0.952452540 7.042376041  
H 4.604278564 2.044950485 5.843623638  
H 4.321834564 2.789210558 3.527411938  
C 2.387484789 5.353077888 3.667585850  
C 2.097834826 5.063739777 5.002200603  
C 3.631443024 5.870975971 3.298203468  
C 3.082625866 5.271741390 5.973726749  
C 4.610975742 6.064619064 4.280833244  
C 4.341666222 5.762115479 5.617563725  
H 1.127280235 4.675330639 5.293512821  
H 3.838639259 6.136974812 2.265584469  
H 2.860392570 5.041297913 7.013140678  
H 5.581530571 6.464383602 3.994680405  
H 5.103090763 5.918385506 6.377218246  
Cl -0.060831066 7.140223503 2.635031462

=====  
L1\_90  
=====

C -0.385056734 0.974410534 3.129380941







C 3.675221205 1.099422455 0.441987425  
 C 4.871147156 0.797076344 -0.479537994  
 C 6.207621098 1.194216967 0.168069258  
 C 6.192105770 2.656795502 0.643778145  
 C 5.006306171 2.908752680 1.591287971  
 H 3.668557644 3.207507849 -0.033920154  
 H 2.742192030 0.835521400 -0.066634670  
 H 3.730169296 0.475250810 1.344044328  
 H 4.875738621 -0.266904533 -0.745743632  
 H 4.742847919 1.354866385 -1.418552160  
 H 6.394535065 0.541733742 1.033153057  
 H 7.132475376 2.903222322 1.150735497  
 H 6.115686893 3.327910900 -0.223980457  
 H 5.007194996 3.939976454 1.962429047  
 H 5.123648643 2.254893303 2.461977243  
 H 7.033132076 1.028315544 -0.534180224  
 Pd 1.964795113 5.218561649 2.694325686  
 C 0.386287212 -0.838674128 1.361287236  
 H 1.345239162 -0.364163488 1.596152782  
 C 0.344498783 -1.054854155 -0.160664216  
 C 0.355460972 -2.192050695 2.099306107  
 H 0.478628367 -2.056899071 3.177761555  
 H -0.599980950 -2.700970888 1.928865433  
 H 1.159268141 -2.847457170 1.744682312  
 H -0.529324412 -1.640108347 -0.466325551  
 H 1.233404398 -1.605605364 -0.486790478  
 H 0.314850807 -0.106477477 -0.706617117  
 C -1.240954995 2.823290110 4.554026127  
 H -0.160657451 2.912976027 4.700490952  
 C -1.836126328 2.286703348 5.869512558  
 C -1.763233900 4.239388943 4.250458717  
 H -1.279141068 4.667224884 3.368386984  
 H -2.846592903 4.252625465 4.088481426  
 H -1.542405128 4.904885769 5.090732574  
 H -2.923002243 2.170591116 5.789015770  
 H -1.628610015 2.976204634 6.694708824  
 H -1.412013412 1.309981704 6.124886513  
 C -4.492251396 0.594197214 1.370750070  
 H -5.122342110 1.305338383 1.921213746  
 C -5.037150860 -0.820029616 1.644576669  
 C -4.595421314 0.943174064 -0.125411138  
 H -4.257201672 1.965465307 -0.317840338  
 H -3.980913401 0.267566025 -0.731562078  
 H -5.630567551 0.852686882 -0.473212957  
 H -4.461289883 -1.576641917 1.099620819  
 H -6.081685066 -0.902169049 1.323869467  
 H -4.984957695 -1.064162016 2.710355997  
 H 0.238796666 -0.380701303 4.969245434  
 H 2.261574507 -0.262054384 6.400948524  
 H 4.025830746 1.433206081 5.867453575  
 H 3.797522545 2.844427347 3.889268398  
 C 2.241114140 6.107099056 0.943880796  
 C 3.453249216 6.024812698 0.254206717  
 C 1.178877234 6.854835033 0.425104529  
 C 3.586317301 6.662421703 -0.985042751  
 C 1.322971463 7.480295181 -0.817053676  
 C 2.520096779 7.378587723 -1.528795481  
 H 4.292760849 5.476414680 0.665000975

H 0.257017314 6.966152668 0.985270202  
 H 4.529102802 6.591734886 -1.522156000  
 H 0.495198429 8.058029175 -1.220796108  
 H 2.624926567 7.866024971 -2.494123936  
 Cl 1.580000997 7.121284485 4.009857655

=====  
 LI\_120  
 =====

C -0.397715569 0.866112053 2.839944601  
 C -1.496748209 1.592219949 3.354944468  
 C -2.771889448 1.328186035 2.842210531  
 C -2.992742777 0.380668998 1.841937780  
 C -1.888732195 -0.318183213 1.343653083  
 C -0.595696270 -0.096151240 1.825013280  
 C 0.938120663 1.022319913 3.512124300  
 C 1.955101848 1.963288307 3.184257269  
 C 3.032476187 2.118669271 4.081563473  
 C 3.185333490 1.313565493 5.206219196  
 C 2.241066694 0.325851291 5.471434593  
 C 1.131931782 0.205227256 4.639098167  
 H -3.623287201 1.878117085 3.233514071  
 H -2.041151285 -1.060129285 0.565066040  
 P 2.099389076 3.121824265 1.715234637  
 C 0.715267062 2.878027439 0.474557817  
 C 1.112841368 3.253669739 -0.974021733  
 C -0.073887922 3.022681952 -1.929711938  
 C -1.329246879 3.791131258 -1.491846085  
 C -1.701938272 3.436502218 -0.045737639  
 C -0.518810630 3.699599266 0.895377159  
 H 0.451230913 1.817459464 0.498315305  
 H 1.962348342 2.659499407 -1.323383808  
 H 1.417315602 4.306414127 -1.012795329  
 H 0.219871804 3.311185837 -2.946292400  
 H -0.303843677 1.947244287 -1.961765766  
 H -1.131068587 4.870251179 -1.560402632  
 H -2.571892738 4.016746044 0.285672486  
 H -1.983811855 2.378047228 0.020100409  
 H -0.793600380 3.464531183 1.920885086  
 H -0.259701788 4.762208462 0.867074132  
 H -2.162508965 3.575569153 -2.171861649  
 C 3.638627291 2.553406715 0.808198452  
 C 3.590900183 1.084548950 0.343749911  
 C 4.772258282 0.776110411 -0.594102919  
 C 6.121679306 1.114826322 0.059093300  
 C 6.149613380 2.563982964 0.572994828  
 C 4.973567486 2.829966307 1.528445959  
 H 3.618030787 3.203143835 -0.075990900  
 H 2.648782253 0.859168053 -0.163873687  
 H 3.640418053 0.434117943 1.227414131  
 H 4.743962288 -0.279277027 -0.891666174  
 H 4.655875683 1.365188718 -1.515331388  
 H 6.290880203 0.433977008 0.905829787  
 H 7.097594261 2.770034790 1.083797336  
 H 6.091883183 3.258787870 -0.277435511  
 H 5.004570961 3.854836702 1.915979385  
 H 5.071493626 2.159443140 2.389820337  
 H 6.940525055 0.943826079 -0.649721980

|    |              |              |              |    |              |              |              |
|----|--------------|--------------|--------------|----|--------------|--------------|--------------|
| Pd | 2.161209106  | 5.214421272  | 2.710352182  | C  | 2.199910879  | 2.263746738  | 3.671184540  |
| C  | 0.570026159  | -0.919956863 | 1.286552191  | C  | 2.606601000  | 3.228003025  | 4.619560719  |
| H  | 1.493580580  | -0.402343929 | 1.561436296  | C  | 2.558652401  | 2.994858503  | 5.988606453  |
| C  | 0.558802962  | -1.060849071 | -0.245124489 | C  | 2.049580812  | 1.784800053  | 6.457578659  |
| C  | 0.607351243  | -2.307137728 | 1.955637693  | C  | 1.648666859  | 0.821003437  | 5.540531635  |
| H  | 0.705654979  | -2.217560053 | 3.041496038  | H  | -1.067517161 | -2.155581474 | 2.145043373  |
| H  | -0.313628435 | -2.861972094 | 1.743983388  | H  | 3.124938488  | -2.964124441 | 2.219169617  |
| H  | 1.453549981  | -2.896293640 | 1.583920717  | P  | 2.215640306  | 2.939769506  | 1.941378355  |
| H  | -0.267213315 | -1.691640019 | -0.590538263 | C  | 1.349787116  | 1.822165728  | 0.705028713  |
| H  | 1.488694787  | -1.527397990 | -0.588066995 | C  | 2.187116861  | 0.670396149  | 0.114088580  |
| H  | 0.462370723  | -0.090494923 | -0.742935777 | C  | 1.309796333  | -0.237776250 | -0.764556646 |
| C  | -1.328117371 | 2.614762068  | 4.481204987  | C  | 0.640165865  | 0.555099666  | -1.895281911 |
| H  | -0.280026585 | 2.932828426  | 4.491200924  | C  | -0.148196846 | 1.751726985  | -1.343239784 |
| C  | -1.630870461 | 1.963331342  | 5.845373631  | C  | 0.727979243  | 2.645505190  | -0.450675815 |
| C  | -2.182367086 | 3.884015799  | 4.307382584  | H  | 0.525596619  | 1.395874858  | 1.285045981  |
| H  | -2.027826548 | 4.355362415  | 3.333324194  | H  | 2.648615360  | 0.077247716  | 0.900798857  |
| H  | -3.252238035 | 3.675427914  | 4.415938854  | H  | 2.994600058  | 1.086478949  | -0.503371298 |
| H  | -1.913418293 | 4.615514755  | 5.075772285  | H  | 1.921991587  | -1.050908804 | -1.173123479 |
| H  | -2.668520689 | 1.612083912  | 5.879307747  | H  | 0.547378540  | -0.708278537 | -0.131185278 |
| H  | -1.489257336 | 2.686142445  | 6.656241894  | H  | 1.414565086  | 0.924009085  | -2.583915949 |
| H  | -0.977587223 | 1.107843161  | 6.035452843  | H  | -0.563586533 | 2.349247932  | -2.163696289 |
| C  | -4.394901276 | 0.121636368  | 1.309264183  | H  | -1.003500462 | 1.390282393  | -0.755929768 |
| H  | -5.080666065 | 0.776151121  | 1.863488555  | H  | 0.141703129  | 3.476531267  | -0.058976378 |
| C  | -4.834535599 | -1.332754016 | 1.558939815  | H  | 1.524016738  | 3.089588642  | -1.061170936 |
| C  | -4.509522438 | 0.484273493  | -0.183203459 | H  | -0.017068965 | -0.096665464 | -2.483686686 |
| H  | -4.240011692 | 1.530463696  | -0.357980788 | C  | 4.023663998  | 2.942753792  | 1.418043852  |
| H  | -3.844407320 | -0.139067173 | -0.791711211 | C  | 4.993772984  | 3.498471737  | 2.478712320  |
| H  | -5.532877922 | 0.329237998  | -0.543021619 | C  | 6.446496964  | 3.429770947  | 1.978165269  |
| H  | -4.199953556 | -2.036923170 | 1.009014726  | C  | 6.622400284  | 4.174631596  | 0.647718072  |
| H  | -5.867478371 | -1.488120079 | 1.228037357  | C  | 5.645442486  | 3.644512415  | -0.410452843 |
| H  | -4.772663593 | -1.587175131 | 2.621797562  | C  | 4.191903114  | 3.708095312  | 0.086322375  |
| H  | 0.362066448  | -0.524773717 | 4.871927738  | H  | 4.278608799  | 1.887122750  | 1.254788637  |
| H  | 2.344963312  | -0.323106110 | 6.336283684  | H  | 4.901677132  | 2.940347672  | 3.414800644  |
| H  | 4.032969475  | 1.466514349  | 5.867566109  | H  | 4.733754158  | 4.543544292  | 2.699997425  |
| H  | 3.761824131  | 2.902318478  | 3.906191111  | H  | 7.117384911  | 3.840882540  | 2.741771460  |
| C  | 2.342747211  | 6.084131241  | 0.938717723  | H  | 6.728618145  | 2.374820232  | 1.846100330  |
| C  | 3.504999638  | 5.962137699  | 0.173391685  | H  | 6.434354782  | 5.246017933  | 0.806852937  |
| C  | 1.269996524  | 6.856251240  | 0.481899589  | H  | 5.740788460  | 4.212607861  | -1.343264818 |
| C  | 3.573550701  | 6.582431793  | -1.079622507 | H  | 5.896450996  | 2.600649357  | -0.649457276 |
| C  | 1.348968744  | 7.464509964  | -0.774639308 | H  | 3.523947954  | 3.309376478  | -0.682009697 |
| C  | 2.493423939  | 7.321537018  | -1.561813951 | H  | 3.901867628  | 4.758035183  | 0.237585559  |
| H  | 4.355335236  | 5.396542549  | 0.536616266  | H  | 7.656071186  | 4.085768223  | 0.292987019  |
| H  | 0.389558226  | 6.998589516  | 1.098831773  | Pd | 1.311263204  | 5.017069817  | 2.053585768  |
| H  | 4.477335930  | 6.481394291  | -1.675719500 | C  | 3.982088566  | -0.691928148 | 3.408751011  |
| H  | 0.512203455  | 8.060448647  | -1.130681038 | H  | 4.015304089  | 0.388487101  | 3.576671124  |
| H  | 2.547803164  | 7.795473099  | -2.537992239 | C  | 5.003819466  | -1.003397465 | 2.300494194  |
| Cl | 2.066366196  | 7.147262096  | 4.033301353  | C  | 4.389492512  | -1.373293400 | 4.729429245  |

=====  
LI\_130  
=====

|   |              |              |             |   |              |              |             |
|---|--------------|--------------|-------------|---|--------------|--------------|-------------|
| C | 1.457675457  | -0.207979798 | 3.329395294 | H | 5.987670422  | -0.610190392 | 2.579957008 |
| C | 0.142588645  | -0.597473264 | 3.001202106 | H | 4.719002724  | -0.551090717 | 1.345247865 |
| C | -0.057981696 | -1.847935081 | 2.402045012 | C | -1.052260995 | 0.306833088  | 3.293071985 |
| C | 0.994831681  | -2.716832399 | 2.114403009 | H | -0.684819639 | 1.334105730  | 3.385311604 |
| C | 2.290924311  | -2.303539991 | 2.438471317 | C | -1.720328927 | -0.060488753 | 4.633352280 |
| C | 2.546231747  | -1.068043590 | 3.039444447 | C | -2.097916603 | 0.294518471  | 2.164874315 |
| C | 1.729096889  | 1.023379922  | 4.149560928 | H | -1.638693094 | 0.474554449  | 1.188082218 |

|    |              |              |              |    |              |              |              |
|----|--------------|--------------|--------------|----|--------------|--------------|--------------|
| H  | -2.631041288 | -0.661121666 | 2.112787962  | H  | 2.891485453  | 1.109806061  | -0.538463116 |
| H  | -2.836706161 | 1.079192638  | 2.339744806  | H  | 1.765017509  | -0.988871455 | -1.233221292 |
| H  | -2.081891537 | -1.095338225 | 4.613543987  | H  | 0.409277678  | -0.635848522 | -0.169348955 |
| H  | -2.573229313 | 0.599770188  | 4.823328018  | H  | 1.282979488  | 1.035573244  | -2.593783140 |
| H  | -1.024469018 | 0.040720038  | 5.470336437  | H  | -0.678918540 | 2.473457336  | -2.107747316 |
| C  | 0.737807214  | -4.064503193 | 1.456070185  | H  | -1.106451988 | 1.476576328  | -0.723158658 |
| H  | -0.348134696 | -4.161458492 | 1.324391723  | H  | 0.051380247  | 3.521892309  | 0.026477162  |
| C  | 1.205395222  | -5.230174065 | 2.346594572  | H  | 1.421238899  | 3.181702614  | -1.014282346 |
| C  | 1.384971142  | -4.142370224 | 0.060471520  | H  | -0.162914291 | 0.032440532  | -2.507340908 |
| H  | 1.026065350  | -3.336310625 | -0.586842537 | C  | 4.013915539  | 2.878179789  | 1.393397450  |
| H  | 2.475529432  | -4.055661201 | 0.128013581  | C  | 4.998016357  | 3.451040268  | 2.431894541  |
| H  | 1.155522943  | -5.099328518 | -0.421652973 | C  | 6.445231915  | 3.365180254  | 1.918724298  |
| H  | 2.290609837  | -5.202147961 | 2.496530294  | C  | 6.615347385  | 4.078689575  | 0.570289195  |
| H  | 0.958445370  | -6.193261623 | 1.886094928  | C  | 5.626997471  | 3.526139021  | -0.465498298 |
| H  | 0.731019139  | -5.189248085 | 3.332247257  | C  | 4.178540230  | 3.612241507  | 0.042678155  |
| H  | 1.286729336  | -0.141021594 | 5.890840054  | H  | 4.248632431  | 1.814541578  | 1.252396464  |
| H  | 1.976964116  | 1.588317633  | 7.523489952  | H  | 4.910601616  | 2.915299654  | 3.381652117  |
| H  | 2.888429165  | 3.765998840  | 6.678465843  | H  | 4.744431973  | 4.501842499  | 2.633427143  |
| H  | 2.929603100  | 4.205864906  | 4.275692940  | H  | 7.124683380  | 3.789455652  | 2.667397976  |
| C  | -0.413687080 | 4.293462276  | 2.757618427  | H  | 6.721787930  | 2.306245089  | 1.807626367  |
| C  | -0.563130975 | 4.022505283  | 4.118825436  | H  | 6.432949066  | 5.154314995  | 0.705025971  |
| C  | -1.511289716 | 4.213648319  | 1.895931959  | H  | 5.716202736  | 4.069150448  | -1.413700104 |
| C  | -1.816602826 | 3.642174959  | 4.612680912  | H  | 5.870378494  | 2.474980831  | -0.679151058 |
| C  | -2.757846117 | 3.830653667  | 2.402244806  | H  | 3.499273300  | 3.204676867  | -0.711128891 |
| C  | -2.914311886 | 3.535785675  | 3.758098364  | H  | 3.900674582  | 4.668272972  | 0.172819003  |
| H  | 0.273585409  | 4.102447510  | 4.800421238  | H  | 7.645770550  | 3.975746870  | 0.210138291  |
| H  | -1.422577858 | 4.481214046  | 0.849222422  | Pd | 1.486907482  | 5.083385944  | 2.081099749  |
| H  | -1.924733996 | 3.428692102  | 5.673048973  | C  | 3.959669352  | -0.817337990 | 3.270493507  |
| H  | -3.608336687 | 3.773081541  | 1.727616906  | H  | 4.043215275  | 0.254369289  | 3.478611946  |
| H  | -3.885269880 | 3.241086721  | 4.146478653  | C  | 4.910776615  | -1.124527693 | 2.099624395  |
| Cl | 0.697160959  | 7.279667377  | 2.070781469  | C  | 4.406588078  | -1.568132877 | 4.539324760  |

=====  
L1\_140  
=====

|   |              |              |              |   |              |              |              |
|---|--------------|--------------|--------------|---|--------------|--------------|--------------|
| C | 1.466067791  | -0.210038841 | 3.303319216  | H | 5.924515247  | -0.788139284 | 2.344074488  |
| C | 0.119065508  | -0.514996290 | 3.016442776  | H | 4.600886822  | -0.620326698 | 1.179147482  |
| C | -0.174441144 | -1.736439347 | 2.398954153  | C | -1.003731132 | 0.447847307  | 3.390693188  |
| C | 0.818779409  | -2.656878948 | 2.060030699  | H | -0.570372045 | 1.447450280  | 3.490792274  |
| C | 2.147271633  | -2.326656580 | 2.345044851  | C | -1.615851760 | 0.082669415  | 4.756249428  |
| C | 2.493688107  | -1.119956970 | 2.958920002  | C | -2.107224703 | 0.540220141  | 2.323697329  |
| C | 1.816369057  | 0.988987148  | 4.136913300  | H | -1.689542770 | 0.710171759  | 1.327298403  |
| C | 2.199910879  | 2.263746738  | 3.671184301  | H | -2.713658571 | -0.371340305 | 2.281404257  |
| C | 2.611051321  | 3.222567797  | 4.623407841  | H | -2.772460461 | 1.376430392  | 2.554353476  |
| C | 2.644202471  | 2.953575611  | 5.986065388  | H | -2.054907084 | -0.921262503 | 4.726864338  |
| C | 2.231395960  | 1.704000831  | 6.445705414  | H | -2.404990911 | 0.795664907  | 5.018618107  |
| C | 1.825457454  | 0.746428907  | 5.524439812  | H | -0.863886356 | 0.102200821  | 5.549850464  |
| H | -1.209097981 | -1.981083989 | 2.174212456  | C | 0.462030917  | -3.974651814 | 1.386804223  |
| H | 2.933239698  | -3.029034376 | 2.082374334  | H | -0.631155550 | -4.004474640 | 1.286913157  |
| P | 2.215640306  | 2.939769506  | 1.941378355  | C | 0.884857357  | -5.182252407 | 2.243133068  |
| C | 1.282712936  | 1.857634425  | 0.713519812  | C | 1.061640859  | -4.065592289 | -0.029121608 |
| C | 2.083194971  | 0.701085031  | 0.081822351  | H | 0.734119356  | -3.227367163 | -0.651721060 |
| C | 1.175188422  | -0.170472056 | -0.802824199 | H | 2.156956434  | -4.046935558 | 0.006231687  |
| C | 0.509317517  | 0.658969581  | -1.908590913 | H | 0.759638548  | -4.997687340 | -0.519871116 |
| C | -0.256288171 | 1.848509431  | -1.311800838 | H | 1.973716497  | -5.221249104 | 2.360626459  |
| C | 0.637999833  | 2.712226391  | -0.405563056 | H | 0.567576587  | -6.120336056 | 1.774179816  |
| H | 0.473012596  | 1.432057977  | 1.312810063  | H | 0.442657590  | -5.131724834 | 3.243189335  |
| H | 2.540637970  | 0.080550410  | 0.849354446  | H | 1.518050551  | -0.237277225 | 5.866764069  |

H 2.228153229 1.475787401 7.507766247  
H 2.968452930 3.723935843 6.679330349  
H 2.878489733 4.219701290 4.285696507  
C -0.331438303 4.521484375 2.676164627  
C -0.567962766 4.095598221 3.983426571  
C -1.393269181 4.718808651 1.788033009  
C -1.881736159 3.839303732 4.394697666  
C -2.698709011 4.450511456 2.209495306  
C -2.946876049 4.007930756 3.510169029  
H 0.244509012 3.962996483 4.686262608  
H -1.222324252 5.112975597 0.792497337  
H -2.062712193 3.508673906 5.414433956  
H -3.522493362 4.607156277 1.517778993  
H -3.964405060 3.808767557 3.835150003  
Cl 1.094638109 7.395953655 2.149417639

=====  
LI\_150  
=====

C 1.470183730 -0.205925882 3.333998919  
C 0.121470250 -0.500018120 3.042007923  
C -0.176253855 -1.710433483 2.405940294  
C 0.813305914 -2.630224943 2.053790092  
C 2.143700838 -2.307078838 2.338087797  
C 2.494176865 -1.108985186 2.967486382  
C 1.826777697 0.994410217 4.160596371  
C 2.110996962 2.284226656 3.648811340  
C 2.521091938 3.261458158 4.584850311  
C 2.616967201 3.012096405 5.949065685  
C 2.290346622 1.750682831 6.441304207  
C 1.900962830 0.762779295 5.544852734  
H -1.211715817 -1.948018074 2.177501917  
H 2.927560091 -3.006073952 2.060300589  
P 2.154638529 2.955561638 1.899718046  
C 1.120200276 1.951374173 0.698120654  
C 1.808921337 0.728028417 0.057807036  
C 0.817571998 -0.056296352 -0.819703460  
C 0.198369235 0.833000958 -1.906530023  
C -0.453319550 2.080014944 -1.290853620  
C 0.532958686 2.862137079 -0.407207340  
H 0.286864251 1.601662040 1.315688014  
H 2.220553875 0.066555895 0.818810225  
H 2.643317223 1.066109896 -0.571060061  
H 1.333038568 -0.913573980 -1.269372463  
H 0.028913867 -0.468483299 -0.177078366  
H 0.986029327 1.147929192 -2.606816053  
H -0.842226565 2.739097595 -2.076449871  
H -1.316207767 1.779947639 -0.679453671  
H 0.032119393 3.721590996 0.037862312  
H 1.344013214 3.256692886 -1.033112645  
H -0.535437584 0.266948223 -2.493082762  
C 3.938116789 2.766787767 1.345685363  
C 4.957518101 3.257249355 2.393246412  
C 6.396975040 3.063962221 1.886429667  
C 6.625199318 3.771083832 0.542461157  
C 5.598621368 3.307420254 -0.501128495  
C 4.157966614 3.498701334 0.003018938  
H 4.094142914 1.690914392 1.195588470

H 4.822360039 2.727377176 3.340349674  
H 4.782835484 4.323283195 2.599609137  
H 7.103558540 3.431700945 2.639867783  
H 6.591828346 1.987586260 1.770029306  
H 6.528026581 4.856818199 0.685374856  
H 5.734005928 3.850605726 -1.443861604  
H 5.760440826 2.242702484 -0.724406719  
H 3.451810360 3.147860765 -0.755456090  
H 3.956444740 4.570481777 0.143969864  
H 7.645210266 3.590494871 0.182883382  
Pd 1.548550129 5.188899994 2.250832081  
C 3.962958813 -0.796813369 3.250952721  
H 4.038246632 0.271922350 3.477077246  
C 4.879633427 -1.069314480 2.044705391  
C 4.457504749 -1.564747214 4.490848541  
H 3.868621111 -1.305214167 5.375344753  
H 4.372892857 -2.645884752 4.332880497  
H 5.507852554 -1.332099080 4.700194836  
H 4.966202259 -2.139789104 1.830001354  
H 5.889598370 -0.695935547 2.247603893  
H 4.511985302 -0.579174042 1.137793303  
C -0.997745454 0.459371507 3.437463760  
H -0.569289386 1.463207006 3.513287306  
C -1.559289098 0.103573211 4.827926159  
C -2.138963223 0.533637166 2.408152819  
H -1.761302710 0.671295881 1.390036225  
H -2.755400419 -0.372340143 2.414521933  
H -2.788739681 1.382159829 2.641304493  
H -1.982808232 -0.907539189 4.826018333  
H -2.351491451 0.806483030 5.108716011  
H -0.780783415 0.144861981 5.595099926  
C 0.448830992 -3.940197468 1.369453192  
H -0.645343125 -3.968003988 1.280074954  
C 0.878751755 -5.157662392 2.208271027  
C 1.033297896 -4.016117573 -0.053216118  
H 0.695027292 -3.173170328 -0.663393557  
H 2.128838539 -3.993660450 -0.029532950  
H 0.729129314 -4.944396019 -0.549887300  
H 1.968734026 -5.199735165 2.313616514  
H 0.554817021 -6.090194702 1.732760072  
H 0.447470546 -5.117123127 3.213551998  
H 1.653848052 -0.231951550 5.904525280  
H 2.340239525 1.536669493 7.505227566  
H 2.930692673 3.808282852 6.617685795  
H 2.744103670 4.266111374 4.235462189  
C -0.318667054 4.685352802 2.720288277  
C -0.635975003 4.146539211 3.966956377  
C -1.324485421 5.006692886 1.804034710  
C -1.977146983 3.899035692 4.284573078  
C -2.658251047 4.743973732 2.130716085  
C -2.988062859 4.186522484 3.367717028  
H 0.133705035 3.923630953 4.694597244  
H -1.085969806 5.485654354 0.860692263  
H -2.222253561 3.480778694 5.257702827  
H -3.439479351 4.993862152 1.417227030  
H -4.026990414 3.992549181 3.620226622  
Cl 1.282786489 7.477737427 2.656846523

=====  
 LI\_160  
 =====

C 0.928424299 -0.158111870 2.403867483  
 C -0.413436592 -0.294239193 1.977882624  
 C -0.735373974 -1.335893512 1.104266524  
 C 0.223528370 -2.246403694 0.645508587  
 C 1.541960955 -2.081020355 1.069400907  
 C 1.918689966 -1.049414277 1.937775850  
 C 1.292146444 0.843984604 3.459538937  
 C 1.653590798 2.191266775 3.206018448  
 C 2.034550190 2.957326889 4.333097935  
 C 2.029258251 2.458564043 5.631683826  
 C 1.629087090 1.145221472 5.865151405  
 C 1.266613245 0.358382940 4.777775288  
 H -1.763709068 -1.446255565 0.773490608  
 H 2.296223640 -2.777379274 0.711895704  
 P 1.872659087 3.132909060 1.604391217  
 C 0.797490001 2.499475479 0.202603906  
 C 1.392411709 1.347594738 -0.636246860  
 C 0.385475039 0.866713047 -1.695414901  
 C -0.067967020 2.013310909 -2.609114647  
 C -0.627310097 3.182431936 -1.785729051  
 C 0.375247806 3.665550232 -0.724130273  
 H -0.100865781 2.136581898 0.709751010  
 H 1.684594274 0.509791970 -0.004350761  
 H 2.296042204 1.700972915 -1.149588943  
 H 0.839880466 0.061227266 -2.285007954  
 H -0.481431067 0.426319987 -1.186642051  
 H 0.791118979 2.367100000 -3.197919369  
 H -0.898099840 4.019869804 -2.439920425  
 H -1.552902341 2.867961407 -1.282792449  
 H -0.065860040 4.472724438 -0.138762847  
 H 1.260566711 4.080635548 -1.223633528  
 H -0.816010356 1.657063127 -3.327747107  
 C 3.652307510 2.797789097 1.106069446  
 C 4.638658047 2.978235960 2.278706789  
 C 6.082926273 2.699278831 1.829829335  
 C 6.488944054 3.584578753 0.642792225  
 C 5.501600266 3.424656391 -0.521994114  
 C 4.057458401 3.707834959 -0.075519674  
 H 3.695037603 1.751967430 0.779415727  
 H 4.374080658 2.319822550 3.111089468  
 H 4.567865372 4.007976055 2.659297943  
 H 6.765279770 2.850198030 2.674663067  
 H 6.167795181 1.641525030 1.540882707  
 H 6.499924183 4.635904789 0.963942945  
 H 5.768695354 4.093495846 -1.348668694  
 H 5.561561108 2.398604155 -0.913580179  
 H 3.376743793 3.578535557 -0.922415793  
 H 3.969855070 4.758652210 0.235292539  
 H 7.507658005 3.343698740 0.316580474  
 Pd 1.682944536 5.355241299 2.319370508  
 C 3.379523039 -0.909444928 2.361592770  
 H 3.509642124 0.094981283 2.777135849  
 C 4.359375954 -1.045285821 1.182186842  
 C 3.731387377 -1.915769815 3.473496675  
 H 3.103363991 -1.764629006 4.356075764

H 3.582639694 -2.943634987 3.123757839  
 H 4.778578758 -1.808215380 3.778537035  
 H 4.397901058 -2.070529699 0.798869908  
 H 5.372947216 -0.779795468 1.502019286  
 H 4.082877636 -0.391719967 0.348805279  
 C -1.502269268 0.647423148 2.492529631  
 H -1.025630951 1.592727184 2.772426844  
 C -2.158756733 0.078218065 3.766345501  
 C -2.581895113 0.980781794 1.448001266  
 H -2.146008968 1.275456190 0.488331556  
 H -3.249209166 0.131241664 1.263520122  
 H -3.195404530 1.813922524 1.805526495  
 H -2.633225918 -0.887127995 3.555366516  
 H -2.929291487 0.762906730 4.138935566  
 H -1.423973918 -0.070827864 4.562130928  
 C -0.158601001 -3.384999514 -0.289759517  
 H 0.752491355 -3.965961218 -0.486207128  
 C -0.677787423 -2.860523939 -1.641421914  
 C -1.182332516 -4.332114220 0.363111228  
 H -0.808362484 -4.723351955 1.314574718  
 H -2.127568960 -3.814966917 0.562545419  
 H -1.400134683 -5.180332184 -0.295415878  
 H -1.589213252 -2.266217947 -1.509988546  
 H -0.915614843 -3.691684484 -2.314769506  
 H 0.065462507 -2.223797798 -2.130702734  
 H 0.959745467 -0.672382176 4.929817200  
 H 1.601526856 0.738791823 6.871970654  
 H 2.325947285 3.106049538 6.451516151  
 H 2.321379662 3.996697664 4.192489147  
 C -0.293468446 5.162818909 2.483061075  
 C -1.073254347 5.927877903 1.609754920  
 C -0.893825412 4.342138767 3.438766479  
 C -2.466653347 5.830353260 1.671494246  
 C -2.291285992 4.257930279 3.490919828  
 C -3.079139233 4.989042759 2.602841139  
 H -0.607977569 6.606462002 0.902789235  
 H -0.301096141 3.772370100 4.142675400  
 H -3.071248770 6.423875809 0.990344465  
 H -2.755405426 3.614751339 4.234982967  
 H -4.162497997 4.917829037 2.645918131  
 Cl 1.818527579 7.539615154 3.148617744

=====  
 LI\_170  
 =====

C 0.937874436 -0.156659409 2.413002491  
 C -0.430083752 -0.228080928 2.050803185  
 C -0.838685036 -1.238270283 1.177181482  
 C 0.055946313 -2.180940390 0.656760156  
 C 1.398248196 -2.081149101 1.019274354  
 C 1.861862183 -1.083240986 1.885964274  
 C 1.382510781 0.822933733 3.459522486  
 C 1.653590798 2.191266775 3.206018448  
 C 2.020739079 2.962007999 4.335940361  
 C 2.104425192 2.444928408 5.625138283  
 C 1.821659684 1.100801349 5.850452900  
 C 1.457165360 0.311727405 4.765477657  
 H -1.886200786 -1.301441073 0.899012208

H 2.103442192 -2.801703930 0.612563014  
P 1.872659087 3.132909060 1.604391217  
C 0.718483925 2.556472540 0.240713179  
C 1.234918594 1.385283232 -0.624065816  
C 0.170071751 0.949456334 -1.645363569  
C -0.278495669 2.118002415 -2.533520699  
C -0.759439051 3.301213980 -1.681148529  
C 0.306522936 3.742089987 -0.664020538  
H -0.172983572 2.224815607 0.781386733  
H 1.517562985 0.532759488 -0.006419635  
H 2.132101774 1.704985857 -1.169704914  
H 0.571499825 0.132234022 -2.256994247  
H -0.691700876 0.536655366 -1.105307937  
H 0.567811072 2.444193363 -3.155854940  
H -1.030793548 4.151075363 -2.318767786  
H -1.671304345 3.015332699 -1.137339115  
H -0.075483344 4.565013885 -0.059954543  
H 1.186938882 4.121520996 -1.200265288  
H -1.068385720 1.793979168 -3.221976995  
C 3.614132881 2.695400000 1.058468103  
C 4.635648251 2.823836327 2.208660126  
C 6.053225517 2.472474813 1.727991104  
C 6.476130962 3.335042000 0.530227423  
C 5.455497742 3.225081682 -0.611621499  
C 4.038424492 3.583392143 -0.132934481  
H 3.588433027 1.649639726 0.731383026  
H 4.355401993 2.181857824 3.048477888  
H 4.627137661 3.855886936 2.589935064  
H 6.760869026 2.590371609 2.557091713  
H 6.079211235 1.411886811 1.439558029  
H 6.547645569 4.384742260 0.848806381  
H 5.738207817 3.877775908 -1.445970774  
H 5.453066349 2.196736336 -1.001828551  
H 3.331848383 3.489372730 -0.963607311  
H 4.012754917 4.637407780 0.179003492  
H 7.473469734 3.042382002 0.181145594  
Pd 1.881068230 5.354570866 2.346075296  
C 3.349237442 -1.013548613 2.225073576  
H 3.540127754 -0.036844235 2.681626558  
C 4.245837212 -1.124369860 0.978030682  
C 3.734992743 -2.087393999 3.259383202  
H 3.171252012 -1.964535713 4.188426495  
H 3.527973890 -3.090106964 2.868779421  
H 4.802796364 -2.030253649 3.499311447  
H 4.218787193 -2.130375385 0.545841455  
H 5.287634373 -0.912523925 1.241810918  
H 3.941966772 -0.421765476 0.195802078  
C -1.458199739 0.735965729 2.645627260  
H -0.945804358 1.674390435 2.880215168  
C -2.017375231 0.182848826 3.972197771  
C -2.613670349 1.084056735 1.692385197  
H -2.253080606 1.370426297 0.699631453  
H -3.307857275 0.245680168 1.566577911  
H -3.182580233 1.927343369 2.096503019  
H -2.528305769 -0.772271454 3.803927898  
H -2.739653587 0.884120703 4.405654430  
H -1.222164750 0.019122472 4.704154491  
C -0.421188265 -3.288030148 -0.272735804

H 0.463044018 -3.864879370 -0.575186372  
C -1.068073034 -2.726859570 -1.552034616  
C -1.382299542 -4.248566628 0.452804625  
H -0.912997127 -4.680108070 1.342650414  
H -2.290395975 -3.725598335 0.773362517  
H -1.684534669 -5.068853855 -0.207923189  
H -1.972119689 -2.152302265 -1.321086168  
H -1.355969191 -3.539831161 -2.227889299  
H -0.380231261 -2.064076662 -2.085606813  
H 1.211153150 -0.735867202 4.911829472  
H 1.874767542 0.675193310 6.848342896  
H 2.386590481 3.101437569 6.442916870  
H 2.239398479 4.019332886 4.205597878  
C -0.105514400 5.348455906 2.490956306  
C -0.789602399 6.256396294 1.675520182  
C -0.801350415 4.527117252 3.379339933  
C -2.185410738 6.310241222 1.732351780  
C -2.199809790 4.594097614 3.425717115  
C -2.894391298 5.476073742 2.599352360  
H -0.246963277 6.924181461 1.015432715  
H -0.281901956 3.842052460 4.036945820  
H -2.715425253 7.016903877 1.098775268  
H -2.737748623 3.951867104 4.119211674  
H -3.979073048 5.524239063 2.638877869  
Cl 2.254333973 7.503388882 3.198791742

=====  
L1\_180  
=====

C 3.560402155 0.080032662 2.524892330  
C 2.639930725 -0.971505821 2.334285259  
C 3.047343731 -2.100658894 1.611739516  
C 4.329312325 -2.216989756 1.076710105  
C 5.225722313 -1.162131190 1.281981230  
C 4.873936176 -0.017151536 1.999655843  
C 3.217920065 1.233944058 3.419868946  
C 2.855577946 2.536466837 3.000862360  
C 2.678188801 3.525427580 3.991019249  
C 2.840917349 3.261342764 5.347503662  
C 3.184128046 1.976126313 5.755913734  
C 3.376159430 0.988468647 4.794592857  
H 2.345844984 -2.916919231 1.461545467  
H 6.230803490 -1.243682742 0.879669130  
P 2.308631182 3.102835655 1.315896988  
C 0.583087981 2.371654272 1.153461099  
C -0.119165353 2.901327372 -0.118675575  
C -1.522797585 2.290997505 -0.264581114  
C -2.385175943 2.586503744 0.971205235  
C -1.695312023 2.095219374 2.252198219  
C -0.279859155 2.678591490 2.398228407  
H 0.701209486 1.286087751 1.067110419  
H 0.476284564 2.695786476 -1.013445497  
H -0.207850546 3.995816708 -0.055628236  
H -2.001646042 2.680640221 -1.170597553  
H -1.431553006 1.202960491 -0.397598982  
H -2.549668312 3.670975685 1.042256355  
H -2.290808201 2.357165813 3.134808302  
H -1.629204988 0.998840511 2.230364799





|       |              |              |              |    |              |              |              |
|-------|--------------|--------------|--------------|----|--------------|--------------|--------------|
| C     | 5.581313133  | 5.773096561  | 3.667891264  | C  | 1.519561648  | 6.550878048  | 5.451066971  |
| H     | 5.007214546  | 6.111217499  | 2.801648617  | C  | 1.421284795  | 5.251993656  | 4.948001862  |
| H     | 5.877209187  | 6.664502621  | 4.231541157  | C  | 2.583169460  | 3.039008141  | 4.578923225  |
| H     | 6.498620987  | 5.285110950  | 3.318949461  | C  | 2.258459330  | 2.239577770  | 3.450522423  |
| H     | 5.596891403  | 5.328911781  | 6.478253841  | C  | 2.183485031  | 0.830955386  | 3.593519449  |
| H     | 6.526556969  | 4.103532791  | 5.597171307  | C  | 2.426079988  | 0.274391294  | 4.858730793  |
| H     | 5.004253387  | 3.662368298  | 6.386919498  | C  | 2.684449434  | 1.047094584  | 5.993123055  |
| C     | 1.837793946  | 8.561563492  | 6.215788364  | C  | 2.751236200  | 2.444193840  | 5.854659081  |
| H     | 2.808538198  | 9.053548813  | 6.072478771  | H  | 4.855703831  | 7.034570217  | 5.272165298  |
| C     | 1.578829050  | 8.457299232  | 7.732308388  | H  | 0.608824730  | 7.071937084  | 5.727299690  |
| C     | 0.774528205  | 9.432359695  | 5.527296543  | P  | 2.231511354  | 3.079941750  | 1.785072565  |
| H     | 0.937034070  | 9.456153870  | 4.447118759  | C  | 0.590947568  | 2.558659792  | 0.964760005  |
| H     | -0.236958489 | 9.052197456  | 5.711053371  | C  | 0.126513332  | 3.582808256  | -0.079013444 |
| H     | 0.813646555  | 10.454918861 | 5.918890953  | C  | -0.544026375 | 2.309521437  | 1.968723297  |
| H     | 0.621815383  | 7.958205223  | 7.925284386  | H  | 0.811929286  | 1.621904492  | 0.439654112  |
| H     | 1.539410353  | 9.452060699  | 8.190230370  | H  | 0.889260769  | 3.817156315  | -0.821821809 |
| H     | 2.364004135  | 7.879544258  | 8.231998444  | H  | -0.154333100 | 4.519994259  | 0.408936441  |
| C     | 2.605278969  | 5.855730534  | 0.206949815  | H  | -0.286250979 | 1.594753742  | 2.752200127  |
| C     | 3.951893806  | 6.008857727  | -0.139658406 | H  | -0.842850745 | 3.243827820  | 2.448385239  |
| C     | 1.617599010  | 6.146851063  | -0.736987531 | C  | 3.511282921  | 2.129821301  | 0.779046595  |
| C     | 4.306963444  | 6.386545658  | -1.439312339 | C  | 4.926537037  | 2.374499083  | 1.315706134  |
| C     | 1.977674842  | 6.518692493  | -2.036454678 | C  | 3.409355164  | 2.400810003  | -0.730847538 |
| C     | 3.321861267  | 6.627656460  | -2.398081064 | H  | 3.272724390  | 1.075932622  | 0.938147485  |
| H     | 4.735269070  | 5.844541550  | 0.592043281  | H  | 5.023460865  | 2.040253162  | 2.352874517  |
| H     | 0.569469512  | 6.109360218  | -0.464560211 | H  | 5.197920799  | 3.431631804  | 1.269290447  |
| H     | 5.358557224  | 6.493481636  | -1.695323706 | H  | 2.434290171  | 2.117513657  | -1.136384487 |
| H     | 1.198436737  | 6.736371994  | -2.763218641 | H  | 3.591858625  | 3.447642803  | -0.974480748 |
| H     | 3.597380400  | 6.917692184  | -3.408238888 | Pd | 2.392350197  | 5.389395237  | 2.091079473  |
| Cl    | 1.914574504  | 7.726971626  | 2.368921757  | C  | 0.044428170  | 4.603683472  | 4.851263046  |
| O     | 2.821130753  | -1.096409202 | 4.990410805  | H  | 0.165422037  | 3.629796505  | 4.372262955  |
| C     | 4.184462547  | -1.522376299 | 4.989714146  | C  | -0.906403840 | 5.442006111  | 3.976219177  |
| H     | 4.697380066  | -1.232461929 | 4.063131332  | C  | -0.563182235 | 4.349150181  | 6.243186474  |
| H     | 4.735047817  | -1.100947857 | 5.841302872  | H  | 0.074375212  | 3.688245296  | 6.837656975  |
| H     | 4.173044205  | -2.611762524 | 5.070112705  | H  | -0.688558698 | 5.285434246  | 6.798082829  |
| C     | 2.427790642  | -0.216257855 | 2.453311205  | H  | -1.548176885 | 3.877329826  | 6.152193069  |
| H     | 3.431888103  | -0.529740334 | 2.142636061  | H  | -1.111808658 | 6.419237614  | 4.424716473  |
| H     | 1.918192029  | -1.115352392 | 2.806058168  | H  | -1.865729332 | 4.926676750  | 3.851005077  |
| H     | 1.906311393  | 0.142057076  | 1.570749164  | H  | -0.472061276 | 5.626386642  | 2.988322496  |
| C     | 2.763470411  | 0.412971854  | 7.374054432  | C  | 5.160103798  | 4.536976814  | 4.282588959  |
| H     | 1.967182517  | 0.746541500  | 8.047466278  | H  | 4.881641388  | 3.629675627  | 3.742778063  |
| H     | 2.707743645  | -0.672764361 | 7.292256355  | C  | 6.004358768  | 4.112203121  | 5.497915268  |
| H     | 3.713964462  | 0.676678658  | 7.855098724  | C  | 5.990384102  | 5.408443451  | 3.322079659  |
| C     | 2.410147905  | 3.270337105  | 7.157601833  | H  | 5.368637085  | 5.808768272  | 2.517364025  |
| H     | 1.507025003  | 3.021680832  | 7.728390217  | H  | 6.443290234  | 6.260754108  | 3.840240955  |
| H     | 3.260096788  | 3.046877146  | 7.811509132  | H  | 6.805269718  | 4.820297718  | 2.884356022  |
| H     | 2.401499510  | 4.342806339  | 6.980569839  | H  | 6.243407726  | 4.976720810  | 6.127507210  |
| H     | -0.656985760 | 2.782866955  | -0.689663649 | H  | 6.948778152  | 3.663646698  | 5.168916225  |
| H     | -1.134243965 | 1.290319681  | 1.249377370  | H  | 5.479683876  | 3.378726244  | 6.114706039  |
| H     | 4.459355354  | 2.149371147  | -1.194260716 | C  | 2.840423346  | 8.592351913  | 6.199471474  |
| H     | 5.855349064  | 2.387722492  | 0.831124544  | H  | 3.844014406  | 8.973644257  | 5.970091820  |
| ===== |              |              |              |    |              |              |              |
| L2_10 |              |              |              |    |              |              |              |
| ===== |              |              |              |    |              |              |              |
| C     | 2.610061169  | 4.554069042  | 4.583087921  | H  | 1.894048095  | 9.588899612  | 4.510023594  |
| C     | 3.864350557  | 5.226951599  | 4.690439224  | H  | 0.797108054  | 9.311329842  | 5.871947765  |
| C     | 3.900277615  | 6.522979736  | 5.197041988  | H  | 2.010200977  | 10.588867188 | 5.981884480  |
| C     | 2.744115829  | 7.200948715  | 5.596360683  | H  | 1.717827082  | 8.123255730  | 8.011833191  |
|       |              |              |              | H  | 2.816188335  | 9.504108429  | 8.186516762  |
|       |              |              |              | H  | 3.460288763  | 7.848946095  | 8.166893959  |

|    |              |              |              |    |              |             |              |
|----|--------------|--------------|--------------|----|--------------|-------------|--------------|
| C  | 2.787497282  | 5.821306705  | 0.168373197  | H  | -0.539725006 | 3.151440620 | 2.906373024  |
| C  | 4.116911411  | 5.752478600  | -0.258953452 | H  | -0.396659344 | 4.541754723 | 1.822247744  |
| C  | 1.809026361  | 6.311892509  | -0.700042665 | C  | 3.371750116  | 1.994438291 | 0.691998601  |
| C  | 4.455804825  | 6.122775078  | -1.565446138 | C  | 4.466653824  | 1.219743252 | 1.438118577  |
| C  | 2.151985168  | 6.673988819  | -2.005578756 | C  | 3.986173868  | 2.816098452 | -0.449684471 |
| C  | 3.472828388  | 6.572964191  | -2.446184874 | H  | 2.684266567  | 1.263764620 | 0.249512106  |
| H  | 4.899240017  | 5.415453434  | 0.412058860  | H  | 4.091563225  | 0.671790838 | 2.305215597  |
| H  | 0.787968516  | 6.439466000  | -0.360395998 | H  | 5.260771751  | 1.889067650 | 1.775273561  |
| H  | 5.492474079  | 6.057549477  | -1.887697101 | H  | 3.235860825  | 3.339250565 | -1.043903232 |
| H  | 1.381708741  | 7.051535606  | -2.674005985 | H  | 4.679143429  | 3.564738750 | -0.054799456 |
| H  | 3.735529900  | 6.859292984  | -3.461010218 | Pd | 2.606767416  | 5.367908478 | 2.065440178  |
| Cl | 2.308658123  | 7.749422073  | 2.365879297  | C  | 0.771211684  | 5.083683014 | 5.130307198  |
| O  | 2.360569000  | -1.105487585 | 4.986520767  | H  | 0.587436378  | 4.167778015 | 4.563962460  |
| C  | 3.624754429  | -1.757660270 | 4.856937885  | C  | -0.077718362 | 6.198351860 | 4.490112782  |
| H  | 4.086771488  | -1.552627683 | 3.882146120  | C  | 0.328489274  | 4.822267056 | 6.580812931  |
| H  | 4.320375443  | -1.443630934 | 5.646378040  | H  | 0.832881689  | 3.946651697 | 6.997948170  |
| H  | 3.435484409  | -2.829691172 | 4.947940826  | H  | 0.553203881  | 5.682558060 | 7.221239567  |
| C  | 1.845985889  | -0.168615416 | 2.504372835  | H  | -0.751419425 | 4.642300606 | 6.625270367  |
| H  | 2.743969917  | -0.685406685 | 2.144788027  | H  | -0.031856477 | 7.125702381 | 5.071051121  |
| H  | 1.186344385  | -0.940180540 | 2.907507181  | H  | -1.127895594 | 5.889048100 | 4.438956738  |
| H  | 1.358601928  | 0.276449829  | 1.643683553  | H  | 0.274211645  | 6.431198597 | 3.481531143  |
| C  | 2.856987953  | 0.381700307  | 7.337347984  | C  | 5.574714184  | 3.844181776 | 3.783902884  |
| H  | 2.219092369  | 0.849866152  | 8.094128609  | H  | 5.030488968  | 2.949082851 | 3.475867510  |
| H  | 2.598789454  | -0.676155388 | 7.283370972  | C  | 6.600554466  | 3.403622866 | 4.844479561  |
| H  | 3.889805555  | 0.469621330  | 7.697593212  | C  | 6.272102833  | 4.429543972 | 2.542896509  |
| C  | 2.969406128  | 3.256990671  | 7.117438316  | H  | 5.535965919  | 4.763766766 | 1.805693626  |
| H  | 2.103217125  | 3.166498423  | 7.784362793  | H  | 6.889390469  | 5.295770645 | 2.803241968  |
| H  | 3.833274126  | 2.887496710  | 7.680407524  | H  | 6.926505566  | 3.683005333 | 2.077253342  |
| H  | 3.125419140  | 4.315497875  | 6.926188469  | H  | 7.174962521  | 4.257880211 | 5.218594551  |
| H  | -0.755681396 | 3.193818092  | -0.601935029 | H  | 7.308994770  | 2.684231520 | 4.417842388  |
| H  | -1.419355512 | 1.923643470  | 1.433682442  | H  | 6.108823776  | 2.929396391 | 5.699209690  |
| H  | 4.163181782  | 1.796490550  | -1.249253511 | C  | 4.601639748  | 8.270125389 | 6.008780003  |
| H  | 5.652610779  | 1.813561320  | 0.715949655  | H  | 5.662738323  | 8.356142998 | 5.739730358  |

=====  
L2\_20  
=====

|   |              |             |              |    |              |              |              |
|---|--------------|-------------|--------------|----|--------------|--------------|--------------|
| C | 3.184531212  | 4.445587158 | 4.483639717  | H  | 2.813435078  | 9.495851517  | 5.705395222  |
| C | 4.551242352  | 4.816067219 | 4.351275444  | H  | 4.318884850  | 10.418085098 | 5.815275669  |
| C | 4.970565319  | 6.065314770 | 4.813460350  | H  | 3.463501692  | 8.159755707  | 7.871453762  |
| C | 4.095218658  | 6.960361481 | 5.428313255  | H  | 4.914682388  | 9.169568062  | 7.974988461  |
| C | 2.744293451  | 6.606874943 | 5.511280060  | H  | 5.059548855  | 7.399501801  | 7.968729019  |
| C | 2.263211966  | 5.391328812 | 5.032929420  | C  | 1.975209355  | 5.929193020  | 0.242178261  |
| C | 2.800048351  | 2.980170250 | 4.538683414  | C  | 2.839510679  | 5.938044548  | -0.854807377 |
| C | 2.202515602  | 2.269500971 | 3.460590363  | C  | 0.666615784  | 6.400595665  | 0.091781899  |
| C | 1.821205139  | 0.913543046 | 3.660344839  | C  | 2.371047735  | 6.337714672  | -2.111950874 |
| C | 1.956530333  | 0.361444503 | 4.946058273  | C  | 0.205301091  | 6.802653313  | -1.165193200 |
| C | 2.484985590  | 1.073402643 | 6.028532028  | C  | 1.049442053  | 6.755009651  | -2.276566744 |
| C | 2.942282438  | 2.383680344 | 5.814944744  | H  | 3.877408504  | 5.647928238  | -0.740450442 |
| H | 6.015750885  | 6.343882561 | 4.708009243  | H  | 0.003451121  | 6.473195553  | 0.947196186  |
| H | 2.041793108  | 7.312084198 | 5.944119930  | H  | 3.049973488  | 6.328061104  | -2.961667538 |
| P | 2.246415854  | 3.082331181 | 1.778437138  | H  | -0.817138016 | 7.157960415  | -1.269799948 |
| C | 0.536937475  | 2.716839552 | 1.055720091  | H  | 0.688437700  | 7.062819958  | -3.254024744 |
| C | 0.437094927  | 2.971109629 | -0.457527757 | Cl | 2.995890856  | 7.693512917  | 2.350271463  |
| C | -0.540182889 | 3.460791588 | 1.856398940  | O  | 1.530251384  | -0.943517566 | 5.148564339  |
| H | 0.372094095  | 1.651434183 | 1.202364564  | C  | 2.582395077  | -1.911574602 | 5.143886089  |
| H | 1.120550513  | 2.332749367 | -1.025571108 | H  | 3.117764235  | -1.916345596 | 4.184407234  |
| H | 0.632242262  | 4.007944107 | -0.724459767 | H  | 3.308866262  | -1.729084373 | 5.945419312  |
|   |              |             |              | H  | 2.111363888  | -2.884835720 | 5.299814701  |

C 1.276444793 -0.017750878 2.593994379  
H 1.490661979 -1.055512190 2.844742298  
H 0.185261771 0.058647960 2.521923780  
H 1.696192026 0.173747599 1.608866334  
C 2.538689852 0.442102373 7.399367809  
H 2.179371834 1.136395574 8.165182114  
H 1.919464827 -0.454818606 7.437933922  
H 3.563906908 0.167681411 7.679595470  
C 3.568804026 3.110123873 6.990056992  
H 2.829660654 3.306420565 7.775451183  
H 4.353331089 2.495288134 7.445752621  
H 4.009228230 4.065416813 6.715268612  
H -0.579215169 2.725530148 -0.787762403  
H -1.530576229 3.237493753 1.442960978  
H 4.549812317 2.152507067 -1.116688609  
H 4.922495842 0.497293353 0.751221418

=====  
L2\_30  
=====

C 3.481562376 4.304973602 4.421273708  
C 4.846174717 4.598554611 4.147383690  
C 5.393832684 5.798891544 4.603317738  
C 4.648312569 6.722197533 5.338130474  
C 3.292187214 6.454264641 5.545919418  
C 2.684552431 5.287246704 5.087504387  
C 2.982141018 2.874307394 4.478918552  
C 2.150568485 2.302898407 3.471007347  
C 1.612806320 1.003524899 3.699767113  
C 1.880674601 0.366031438 4.924811840  
C 2.659760952 0.945171893 5.932959557  
C 3.222967863 2.209247112 5.704030991  
H 6.438065052 6.016201019 4.394247532  
H 2.685355663 7.186877728 6.068714619  
P 2.254681826 3.081050396 1.774007797  
C 0.515730739 2.931344271 1.043839574  
C 0.443358064 3.228721380 -0.463097155  
C -0.468595266 3.778868675 1.861004233  
H 0.230992928 1.889165521 1.157602429  
H 1.047935367 2.529766560 -1.048690677  
H 0.752497792 4.242057800 -0.709851325  
H -0.468901426 3.488441944 2.917048931  
H -0.224107608 4.841535568 1.806563020  
C 3.200951815 1.816450477 0.703588367  
C 4.136246681 0.852855682 1.447244287  
C 3.952090025 2.522707462 -0.434085578  
H 2.396506071 1.216933250 0.260112911  
H 3.665802002 0.379666448 2.311861515  
H 5.042403698 1.358467221 1.789323330  
H 3.307731867 3.177912951 -1.022061944  
H 4.770735741 3.129237652 -0.036810942  
Pd 2.783921480 5.339405537 2.050467491  
C 1.192721605 5.075455189 5.337273121  
H 0.882151604 4.191944122 4.774603844  
C 0.360583454 6.262639523 4.816764355  
C 0.895844400 4.799891472 6.822462082  
H 1.395911455 3.889185190 7.164377213  
H 1.234915137 5.630356789 7.451996326

H -0.180796534 4.673929691 6.982733727  
H 0.553275764 7.175716877 5.390065193  
H -0.708679736 6.036136150 4.899637222  
H 0.597737491 6.480584621 3.771733046  
C 5.728622437 3.595751286 3.419848442  
H 5.077564240 2.783639908 3.091604471  
C 6.792674065 2.978804588 4.346078396  
C 6.378925323 4.215404987 2.169299364  
H 5.627362251 4.696889400 1.536553621  
H 7.118418217 4.977476120 2.437729359  
H 6.894525051 3.445126295 1.583230853  
H 7.461139202 3.750163555 4.744027138  
H 7.405378342 2.253559828 3.797960043  
H 6.333296776 2.462119341 5.193741322  
C 5.298541546 7.973577499 5.904765129  
H 6.334842205 7.994504929 5.542116165  
C 5.342199326 7.906461239 7.444553375  
C 4.610759258 9.263906479 5.424328804  
H 4.569684505 9.301448822 4.333533287  
H 3.581301212 9.326313972 5.794215679  
H 5.151615620 10.141656876 5.796477795  
H 4.328936577 7.882439613 7.861975193  
H 5.852808952 8.784122467 7.856406212  
H 5.867600441 7.009637833 7.790336609  
C 2.285788536 5.957485199 0.208980739  
C 3.185139418 5.813407421 -0.849958599  
C 1.066719055 6.611247540 -0.002188506  
C 2.831089020 6.249603271 -2.132735014  
C 0.719999135 7.045397758 -1.285220385  
C 1.592555881 6.851458549 -2.358924150  
H 4.161444664 5.370523453 -0.688166916  
H 0.390884161 6.797827721 0.825717032  
H 3.533358097 6.119787693 -2.953336239  
H -0.234148547 7.543960571 -1.440341234  
H 1.319153190 7.187118053 -3.355651617  
Cl 3.206261873 7.641418457 2.437599421  
O 1.347723007 -0.895749629 5.154202938  
C 2.254067183 -1.962991118 4.864936829  
H 2.536541700 -1.969448209 3.802912235  
H 3.167647123 -1.893146276 5.469329834  
H 1.731569409 -2.891631603 5.106111050  
C 0.766451120 0.222235158 2.715353012  
H 0.593959689 -0.787034035 3.083395958  
H -0.219229519 0.680659831 2.593941212  
H 1.231911778 0.147893772 1.730135679  
C 2.858221531 0.230997190 7.248377800  
H 2.680613518 0.906341016 8.091457367  
H 2.175215244 -0.613795340 7.339870453  
H 3.885809422 -0.140310198 7.353799343  
C 4.054472446 2.819555998 6.815641403  
H 3.432153225 3.049004793 7.688851357  
H 4.822357655 2.115314960 7.155159950  
H 4.549996376 3.740828037 6.520283222  
H -0.595742881 3.105371237 -0.791184187  
H -1.485995770 3.645594597 1.474728703  
H 4.384306431 1.773778558 -1.108808994  
H 4.449697971 0.062116455 0.755679846

L2\_40

|    |              |             |              |
|----|--------------|-------------|--------------|
| C  | 3.794119835  | 4.071102142 | 4.360471249  |
| C  | 5.180331707  | 4.231433868 | 4.082128525  |
| C  | 5.823085785  | 5.408744812 | 4.462743759  |
| C  | 5.164301872  | 6.432116985 | 5.148571491  |
| C  | 3.801479578  | 6.275114536 | 5.400117874  |
| C  | 3.092188597  | 5.140553474 | 4.999590397  |
| C  | 3.141469717  | 2.699333429 | 4.411494732  |
| C  | 2.124002457  | 2.325403690 | 3.479265451  |
| C  | 1.344484806  | 1.169676065 | 3.780530214  |
| C  | 1.696861744  | 0.393800437 | 4.903917313  |
| C  | 2.719652653  | 0.738034606 | 5.789529800  |
| C  | 3.413875341  | 1.938826919 | 5.567497730  |
| H  | 6.877851963  | 5.532504082 | 4.230638027  |
| H  | 3.263489962  | 7.070770264 | 5.903124809  |
| P  | 2.262291431  | 3.088500977 | 1.775162816  |
| C  | 0.608474016  | 2.872312069 | 0.912316799  |
| C  | 0.626389146  | 3.130861759 | -0.603670955 |
| C  | -0.432666421 | 3.756518841 | 1.619509220  |
| H  | 0.332289070  | 1.829432130 | 1.035274982  |
| H  | 1.216008306  | 2.380249023 | -1.136223316 |
| H  | 1.002742410  | 4.117501259 | -0.864187539 |
| H  | -0.404008389 | 3.651745558 | 2.709137201  |
| H  | -0.262932867 | 4.807539940 | 1.384369254  |
| C  | 3.469803333  | 1.897682190 | 0.948450267  |
| C  | 4.052654743  | 2.450134993 | -0.360339493 |
| C  | 2.923141241  | 0.474081188 | 0.770401120  |
| H  | 4.283246994  | 1.855964541 | 1.677865148  |
| H  | 4.512931824  | 3.425929308 | -0.211087868 |
| H  | 3.299555063  | 2.553452969 | -1.143988371 |
| H  | 2.622585058  | 0.034528475 | 1.724531293  |
| H  | 2.068466425  | 0.448011041 | 0.086346708  |
| Pd | 2.923801422  | 5.319954872 | 2.035503387  |
| C  | 1.605319500  | 5.047224045 | 5.342598915  |
| H  | 1.181262374  | 4.215285301 | 4.776363373  |
| C  | 0.827562273  | 6.310001850 | 4.929185390  |
| C  | 1.406796813  | 4.732946396 | 6.837883949  |
| H  | 1.879051685  | 3.783750057 | 7.108648300  |
| H  | 1.844736218  | 5.520156860 | 7.462281704  |
| H  | 0.340278238  | 4.662545681 | 7.080071926  |
| H  | 1.114057779  | 7.184703827 | 5.522741318  |
| H  | -0.246780813 | 6.150352001 | 5.076587677  |
| H  | 1.006796241  | 6.554351807 | 3.877936363  |
| C  | 5.988341331  | 3.141508818 | 3.389650345  |
| H  | 5.322216988  | 2.286024570 | 3.235085249  |
| C  | 7.172730923  | 2.639757156 | 4.236336708  |
| C  | 6.479765892  | 3.633841515 | 2.015315771  |
| H  | 5.658856869  | 4.069199562 | 1.440564036  |
| H  | 7.240349293  | 4.413184643 | 2.131386995  |
| H  | 6.922522545  | 2.812862158 | 1.439578652  |
| H  | 7.891750336  | 3.442885876 | 4.429440022  |
| H  | 7.704023838  | 1.839919925 | 3.707886934  |
| H  | 6.842947006  | 2.247742891 | 5.201710701  |
| C  | 5.937000751  | 7.645824909 | 5.638760567  |
| H  | 6.868170261  | 7.689918041 | 5.057274342  |
| C  | 6.317221642  | 7.455154419 | 7.122342110  |

|    |              |              |              |
|----|--------------|--------------|--------------|
| C  | 5.193232536  | 8.973869324  | 5.424293041  |
| H  | 4.873403072  | 9.077391624  | 4.384230137  |
| H  | 4.302564144  | 9.043724060  | 6.060682297  |
| H  | 5.845251560  | 9.814859390  | 5.685461998  |
| H  | 5.415485859  | 7.388857365  | 7.743606567  |
| H  | 6.915103436  | 8.299737930  | 7.483056068  |
| H  | 6.894799709  | 6.535765171  | 7.271654129  |
| C  | 2.274718285  | 5.958606720  | 0.255463779  |
| C  | 3.047032595  | 5.797478676  | -0.897399426 |
| C  | 1.048795223  | 6.628439903  | 0.179742604  |
| C  | 2.557790995  | 6.236079693  | -2.133138180 |
| C  | 0.563913465  | 7.060260296  | -1.058546066 |
| C  | 1.307828665  | 6.851786137  | -2.221978426 |
| H  | 4.028500557  | 5.340902805  | -0.846536636 |
| H  | 0.477315098  | 6.833585739  | 1.079308867  |
| H  | 3.162209511  | 6.094727993  | -3.026332378 |
| H  | -0.395404369 | 7.570194244  | -1.107670903 |
| H  | 0.927818298  | 7.186099529  | -3.183491468 |
| Cl | 3.685207367  | 7.553018570  | 2.302324057  |
| O  | 0.980443060  | -0.766288698 | 5.169106960  |
| C  | 1.478473902  | -1.913929105 | 4.480526447  |
| H  | 1.413983703  | -1.789334059 | 3.390915632  |
| H  | 2.523502588  | -2.117370605 | 4.750362873  |
| H  | 0.854770899  | -2.758076191 | 4.783956051  |
| C  | 0.103937045  | 0.694487989  | 3.045393467  |
| H  | 0.329313278  | 0.184615150  | 2.103537798  |
| H  | -0.430640519 | -0.015354264 | 3.675610304  |
| H  | -0.576915205 | 1.517544270  | 2.834855795  |
| C  | 3.025262594  | -0.129951805 | 6.985394955  |
| H  | 2.949059725  | 0.441940576  | 7.916992188  |
| H  | 2.334155321  | -0.969728589 | 7.048516750  |
| H  | 4.049702168  | -0.519687653 | 6.940004349  |
| C  | 4.410324574  | 2.376155853  | 6.621661663  |
| H  | 3.913830042  | 2.495738745  | 7.592037678  |
| H  | 5.188784599  | 1.617367864  | 6.763411522  |
| H  | 4.896235943  | 3.319004297  | 6.383959293  |
| H  | -0.402384996 | 3.055774450  | -0.975738287 |
| H  | -1.440657139 | 3.491436720  | 1.279194832  |
| H  | 3.703187227  | -0.165651515 | 0.341313690  |
| H  | 4.826335430  | 1.765652180  | -0.727131188 |

L2\_50

|   |             |             |             |
|---|-------------|-------------|-------------|
| C | 4.052602291 | 3.782049179 | 4.284910679 |
| C | 5.423400879 | 3.803794384 | 3.908503771 |
| C | 6.206426620 | 4.909138680 | 4.239827156 |
| C | 5.705507278 | 5.991306305 | 4.968944550 |
| C | 4.358752728 | 5.967190742 | 5.321202755 |
| C | 3.509770155 | 4.910639286 | 4.974956036 |
| C | 3.235408068 | 2.501709223 | 4.322201729 |
| C | 2.080173492 | 2.357045174 | 3.487818003 |
| C | 1.132350683 | 1.351557016 | 3.831227064 |
| C | 1.441069722 | 0.470877707 | 4.888857841 |
| C | 2.598985434 | 0.571129262 | 5.661533833 |
| C | 3.476329327 | 1.640781999 | 5.411013126 |
| H | 7.249025822 | 4.928008556 | 3.931950808 |
| H | 3.941181898 | 6.809006214 | 5.860466480 |

P 2.262928963 3.084848166 1.771984816  
C 0.582679570 3.061423063 0.932693839  
C 0.637756586 3.257093191 -0.593238413  
C -0.322880447 4.111300468 1.600769162  
H 0.163609758 2.072779655 1.097858667  
H 1.046051621 2.377674103 -1.097737193  
H 1.216208696 4.130668640 -0.890159905  
H -0.280122370 4.074284554 2.694208145  
H -0.030401697 5.116458893 1.297692776  
C 3.286719561 1.726489425 0.948935211  
C 3.873205185 2.130697489 -0.412759691  
C 2.562538385 0.374727249 0.860807955  
H 4.119633675 1.619256258 1.649098873  
H 4.368792534 3.099524498 -0.376804262  
H 3.111685753 2.178721189 -1.194162011  
H 2.244049311 0.016802622 1.842557192  
H 1.686246634 0.427722812 0.206037626  
Pd 3.072571754 5.278840065 2.027063131  
C 2.055159569 4.968645573 5.447045803  
H 1.483698726 4.237652779 4.871780872  
C 1.400066495 6.339637756 5.199121475  
C 1.952625036 4.566805840 6.931268692  
H 2.325164795 3.550906897 7.092977047  
H 2.540148735 5.248256207 7.557527065  
H 0.911309898 4.605349541 7.271572113  
H 1.810293555 7.117268085 5.852503300  
H 0.325160772 6.277533531 5.405055523  
H 1.546655297 6.668702602 4.166419983  
C 6.062896729 2.651763678 3.143924713  
H 5.315391064 1.854777575 3.063555956  
C 7.284778118 2.049667597 3.862369299  
C 6.445602894 3.109340668 1.722533464  
H 5.603890419 3.606266260 1.234041572  
H 7.269983768 3.829637766 1.757932663  
H 6.763560295 2.260344505 1.106518149  
H 8.093002319 2.782433510 3.957699299  
H 7.676811695 1.199355125 3.292838573  
H 7.032752514 1.698391199 4.866466045  
C 6.632693768 7.117807388 5.398072243  
H 7.503915787 7.087981701 4.729270458  
C 7.134672642 6.857259274 6.834096432  
C 6.003706455 8.515274048 5.278111458  
H 5.598827362 8.676924706 4.276138306  
H 5.187450886 8.652853012 5.997329712  
H 6.755328178 9.283624649 5.490804672  
H 6.294981480 6.863290787 7.539718151  
H 7.843863487 7.632390022 7.145916462  
H 7.631381989 5.883477688 6.913516045  
C 2.653634310 5.907354355 0.180866569  
C 3.554986238 5.647470951 -0.855377257  
C 1.509140372 6.672958374 -0.066625416  
C 3.269236565 6.085221767 -2.154288530  
C 1.228579402 7.104378223 -1.366754293  
C 2.098433256 6.799293995 -2.416993380  
H 4.486858368 5.126074791 -0.661192179  
H 0.851095974 6.959243774 0.747737110  
H 3.971473455 5.870013237 -2.957644463  
H 0.331979483 7.692376614 -1.552370191

H 1.877280235 7.135100365 -3.427291632  
Cl 3.741664886 7.526342869 2.402593374  
O 0.543732584 -0.541956186 5.199694633  
C 0.726266742 -1.729102373 4.427148819  
H 0.573777556 -1.542022705 3.355757713  
H 1.731775284 -2.146765709 4.571727753  
H -0.018320562 -2.448456049 4.775901794  
C -0.235741645 1.148684025 3.206866741  
H -0.199248508 0.567435145 2.278791428  
H -0.863419116 0.594741762 3.905230761  
H -0.730947733 2.094826937 2.999165773  
C 2.860853434 -0.403247833 6.783137321  
H 2.946457148 0.116568491 7.744372368  
H 2.055739164 -1.132079601 6.867998123  
H 3.806593418 -0.937137306 6.630269527  
C 4.634043694 1.836491585 6.366972446  
H 4.272117615 1.927377224 7.397803783  
H 5.307583809 0.970991731 6.347669125  
H 5.218369484 2.725842953 6.144504547  
H -0.385570765 3.395079851 -0.962586939  
H -1.364033818 3.953967094 1.295198560  
H 3.240943432 -0.374665469 0.436556220  
H 4.615270615 1.382962346 -0.717178881

=====  
L2\_60  
=====

C 4.444368362 3.229767799 4.077504635  
C 5.670705318 2.889976978 3.458221912  
C 6.690563202 3.847354889 3.428030729  
C 6.549754620 5.122720242 3.982169151  
C 5.363016605 5.406176090 4.657848358  
C 4.325266838 4.474181175 4.755730152  
C 3.293979406 2.271112680 4.249595642  
C 2.053312302 2.380125284 3.526999712  
C 0.925600410 1.641221881 3.968187332  
C 1.078965187 0.772117317 5.066189289  
C 2.275775194 0.638673425 5.770641327  
C 3.373403788 1.428110719 5.383549690  
H 7.635042191 3.594742298 2.950453281  
H 5.230388641 6.377728939 5.118611336  
P 2.255701542 3.101126671 1.806058168  
C 0.566938639 3.456688881 1.035887718  
C 0.673235297 3.691502810 -0.481570065  
C -0.072180718 4.685344219 1.710032940  
H -0.072513014 2.588737011 1.181841135  
H 0.802869439 2.757062674 -1.031257987  
H 1.495905399 4.359389305 -0.742348433  
H -0.081001595 4.621113777 2.802306890  
H 0.472179890 5.597751617 1.443319321  
C 2.938629389 1.605172873 0.886392951  
C 3.459168434 1.892909765 -0.532474816  
C 1.969329476 0.412504762 0.888992846  
H 3.793724537 1.339874268 1.509660125  
H 4.050888538 2.806215048 -0.589529932  
H 2.646535873 1.975051880 -1.256056547  
H 1.681038618 0.118980251 1.901614308  
H 1.061514497 0.631098151 0.316578299



|    |              |              |              |    |              |              |              |
|----|--------------|--------------|--------------|----|--------------|--------------|--------------|
| H  | 6.624426842  | 0.612427831  | 0.982836425  | C  | 1.938732147  | 1.730311632  | 2.644062757  |
| H  | 8.089876175  | 1.418241858  | 3.706727266  | C  | 0.984186590  | 1.865994096  | 3.671315193  |
| H  | 7.408757210  | -0.157121703 | 3.277673006  | C  | 1.246073008  | 1.212266922  | 4.892940998  |
| H  | 6.884723663  | 0.664378583  | 4.754091740  | C  | 2.463011265  | 0.595086396  | 5.174879074  |
| C  | 7.507995129  | 6.235824585  | 3.876980305  | C  | 3.441687107  | 0.518340707  | 4.162400723  |
| H  | 8.479986191  | 5.728312016  | 3.783478260  | H  | 4.930591583  | -2.118969202 | -0.065340430 |
| C  | 7.589763641  | 7.176341534  | 5.090711117  | H  | 7.328611851  | 1.322194576  | 0.712234676  |
| C  | 7.259912968  | 7.039827347  | 2.582072258  | P  | 1.984007716  | 2.858989000  | 1.128465652  |
| H  | 7.298342228  | 6.395166397  | 1.698033333  | C  | 0.195259482  | 3.076968431  | 0.565622151  |
| H  | 6.268423557  | 7.505924702  | 2.601002932  | C  | -0.611822248 | 1.774198174  | 0.420938432  |
| H  | 8.016853333  | 7.824610710  | 2.467118025  | C  | 0.055749603  | 3.971704483  | -0.676430881 |
| H  | 6.700160027  | 7.812692642  | 5.163751125  | H  | -0.227402180 | 3.650423050  | 1.388982058  |
| H  | 8.455238342  | 7.840473175  | 4.994853973  | H  | -0.402561128 | 1.066151142  | 1.227512002  |
| H  | 7.688322067  | 6.617535114  | 6.028436184  | H  | -0.406330556 | 1.270508647  | -0.525201499 |
| C  | 3.928497791  | 5.425960541  | 0.332049459  | H  | 0.605596781  | 4.911089897  | -0.562325180 |
| C  | 5.247770786  | 4.972549438  | 0.276788414  | H  | 0.394965678  | 3.476803303  | -1.590167522 |
| C  | 3.322946787  | 6.002781868  | -0.784528911 | C  | 2.903613091  | 2.191210747  | -0.386866689 |
| C  | 5.958241463  | 5.073412895  | -0.923880458 | C  | 3.355412960  | 3.367024422  | -1.279109240 |
| C  | 4.041821003  | 6.090306282  | -1.982530594 | C  | 2.186960697  | 1.112816095  | -1.205452919 |
| C  | 5.355360031  | 5.623157978  | -2.056950569 | H  | 3.809161901  | 1.754801989  | 0.016457245  |
| H  | 5.718955517  | 4.550181866  | 1.155339837  | H  | 3.986836195  | 4.084473610  | -0.738576949 |
| H  | 2.316441298  | 6.403233051  | -0.723230481 | H  | 2.526916027  | 3.917158604  | -1.727730155 |
| H  | 6.985332012  | 4.718071461  | -0.967067420 | H  | 1.770143986  | 0.327496767  | -0.575354159 |
| H  | 3.572052479  | 6.538261890  | -2.854907751 | H  | 1.378921270  | 1.528751493  | -1.813155413 |
| H  | 5.908769131  | 5.697515965  | -2.989134550 | Pd | 3.027734280  | 4.993478775  | 1.432360768  |
| Cl | 3.384979486  | 7.658369541  | 2.414783478  | C  | 5.600173950  | 2.731872082  | 2.232835531  |
| O  | -0.062725239 | 0.007214810  | 5.407233715  | H  | 4.604919910  | 3.170916796  | 2.364469051  |
| C  | -0.295842260 | -1.186081171 | 4.658434391  | C  | 6.373140335  | 3.670713663  | 1.287271976  |
| H  | -0.466417521 | -0.969926476 | 3.595508099  | C  | 6.273319244  | 2.722662687  | 3.616895437  |
| H  | 0.550447226  | -1.880160332 | 4.745930672  | H  | 5.652205467  | 2.228997231  | 4.365779877  |
| H  | -1.190295935 | -1.651224375 | 5.079205990  | H  | 7.239518166  | 2.206196547  | 3.577638626  |
| C  | -0.514998734 | 1.868713975  | 3.474303484  | H  | 6.448575974  | 3.750793695  | 3.950680971  |
| H  | -0.742412686 | 1.245676875  | 2.601712227  | H  | 7.446836948  | 3.450103521  | 1.286353230  |
| H  | -1.208097339 | 1.572539687  | 4.262590408  | H  | 6.241495609  | 4.709957123  | 1.602992773  |
| H  | -0.725295424 | 2.902717590  | 3.218052864  | H  | 6.016820908  | 3.588660240  | 0.255805165  |
| C  | 2.350486279  | -0.552351713 | 6.741788387  | C  | 2.725054979  | -1.460804820 | 1.362406850  |
| H  | 2.697072029  | -0.096135318 | 7.675905228  | H  | 1.906720161  | -0.750079632 | 1.521844149  |
| H  | 1.379099011  | -1.007181048 | 6.932553291  | C  | 2.756500721  | -2.397082567 | 2.588408470  |
| H  | 3.068575621  | -1.343649387 | 6.494672775  | C  | 2.382536173  | -2.297524929 | 0.114106208  |
| C  | 4.617553234  | 1.127240896  | 6.141761303  | H  | 2.476570845  | -1.724560857 | -0.811376095 |
| H  | 4.368084908  | 1.348195434  | 7.186687946  | H  | 3.031818151  | -3.175732374 | 0.029183902  |
| H  | 5.024241447  | 0.109389402  | 6.124301910  | H  | 1.353835940  | -2.666739702 | 0.185160503  |
| H  | 5.400423527  | 1.818404794  | 5.842402458  | H  | 3.644450188  | -3.038432837 | 2.558657646  |
| H  | -0.216295511 | 3.842757225  | -0.978296936 | H  | 1.872164011  | -3.044456244 | 2.593176365  |
| H  | -1.171536446 | 4.605173111  | 1.155076861  | H  | 2.764107227  | -1.837433934 | 3.523257017  |
| H  | 2.703272343  | -0.468203157 | 0.546442449  | C  | 7.371058941  | -1.070899487 | -0.609534621 |
| H  | 4.299388885  | 1.108160377  | -0.735743999 | H  | 7.020835876  | -2.047114611 | -0.970999122 |

=====  
L2\_80  
=====

|   |             |              |             |   |             |              |              |
|---|-------------|--------------|-------------|---|-------------|--------------|--------------|
| C | 4.200536251 | 0.607760310  | 1.844553947 | H | 8.027853012 | 0.794748664  | -1.546236157 |
| C | 4.017530441 | -0.648098528 | 1.212856531 | H | 8.417815208 | -0.656195164 | -2.481237888 |
| C | 5.056994438 | -1.158695340 | 0.425799638 | H | 9.060319901 | -0.364077687 | 0.587313294  |
| C | 6.261950970 | -0.480246097 | 0.248182654 | H | 9.425265312 | -1.783079624 | -0.404795885 |
| C | 6.408393383 | 0.767289162  | 0.862197101 | H | 8.456001282 | -1.954771161 | 1.072328925  |
| C | 5.402981281 | 1.332280159  | 1.650749087 | C | 2.231520653 | 5.239348412  | 3.223179817  |
| C | 3.187115431 | 1.043199062  | 2.868604422 | C | 1.234780312 | 6.207310677  | 3.376151562  |
|   |             |              |             | C | 2.668705225 | 4.480072498  | 4.309665680  |



|    |              |              |              |
|----|--------------|--------------|--------------|
| C  | 0.648607254  | 6.387163162  | 4.634074211  |
| C  | 2.074289322  | 4.674726009  | 5.561686993  |
| C  | 1.059415817  | 5.618526459  | 5.725768566  |
| H  | 0.925750315  | 6.821434975  | 2.537054062  |
| H  | 3.435801506  | 3.722084284  | 4.193511486  |
| H  | -0.130967855 | 7.135275841  | 4.755250454  |
| H  | 2.400832891  | 4.069946766  | 6.403700829  |
| H  | 0.596597075  | 5.759353638  | 6.698420048  |
| Cl | 4.208583832  | 7.019695759  | 1.379383326  |
| O  | 0.295245320  | 1.263521314  | 5.899585724  |
| C  | -0.705783069 | 0.250942439  | 5.791741848  |
| H  | -1.267114878 | 0.338461041  | 4.851720333  |
| H  | -0.262072116 | -0.752543926 | 5.846111298  |
| H  | -1.387472272 | 0.392847270  | 6.633480072  |
| C  | -0.251198947 | 2.738414049  | 3.633484125  |
| H  | -0.663297594 | 2.819244623  | 4.637751579  |
| H  | 0.004881448  | 3.751197815  | 3.320085764  |
| H  | -1.032266855 | 2.346751451  | 2.977722883  |
| C  | 2.709962845  | 0.005355856  | 6.542379856  |
| H  | 3.599350929  | 0.446467429  | 7.006391525  |
| H  | 1.860958338  | 0.184199080  | 7.201263905  |
| H  | 2.889059544  | -1.074859500 | 6.484727859  |
| C  | 4.726130962  | -0.210411638 | 4.516042233  |
| H  | 5.205183983  | 0.249744549  | 5.386867523  |
| H  | 4.523763180  | -1.252881646 | 4.788101673  |
| H  | 5.448025227  | -0.217656597 | 3.703983784  |
| H  | -1.684163451 | 2.002237797  | 0.441658676  |
| H  | -1.002782226 | 4.219842911  | -0.818361342 |
| H  | 2.905375719  | 0.646011293  | -1.889248490 |
| H  | 3.969802380  | 2.968581676  | -2.095503330 |

=====  
L2\_90  
=====

|   |              |              |              |
|---|--------------|--------------|--------------|
| C | 4.157289982  | 0.587632358  | 1.755101681  |
| C | 3.980205536  | -0.615046442 | 1.028141379  |
| C | 5.024402142  | -1.053818107 | 0.203892708  |
| C | 6.225745678  | -0.355370373 | 0.082576640  |
| C | 6.367603302  | 0.839256883  | 0.795927048  |
| C | 5.356173992  | 1.332405448  | 1.622838259  |
| C | 3.145982742  | 0.956832409  | 2.803057671  |
| C | 1.938732028  | 1.730311632  | 2.644062757  |
| C | 0.999264121  | 1.863815784  | 3.681387186  |
| C | 1.246548772  | 1.149534345  | 4.870151043  |
| C | 2.428035736  | 0.444620699  | 5.099099636  |
| C | 3.386839390  | 0.357700467  | 4.068460464  |
| H | 4.903660297  | -1.969734907 | -0.366671383 |
| H | 7.284231663  | 1.410915613  | 0.689866781  |
| P | 1.984007835  | 2.858989000  | 1.128465652  |
| C | 0.182264611  | 2.984590530  | 0.563067853  |
| C | -0.554217398 | 1.640069604  | 0.432254016  |
| C | -0.021684129 | 3.874386072  | -0.673290610 |
| H | -0.267267525 | 3.534217834  | 1.388303995  |
| H | -0.345227569 | 0.972439468  | 1.273311973  |
| H | -0.285587668 | 1.114023328  | -0.486301124 |
| H | 0.468266547  | 4.845893383  | -0.554216743 |
| H | 0.341903180  | 3.410552979  | -1.593343616 |
| C | 2.952147245  | 2.309159279  | -0.408420712 |

|    |              |              |              |
|----|--------------|--------------|--------------|
| C  | 3.333427191  | 3.558642387  | -1.233390808 |
| C  | 2.300912619  | 1.240901947  | -1.291646481 |
| H  | 3.882103682  | 1.909214735  | -0.025406973 |
| H  | 3.923488617  | 4.281874180  | -0.654443860 |
| H  | 2.474863529  | 4.081928253  | -1.655874610 |
| H  | 1.921415329  | 0.403863698  | -0.709826648 |
| H  | 1.476413608  | 1.645801902  | -1.883798599 |
| Pd | 2.858881712  | 5.061327457  | 1.477844000  |
| C  | 5.526290894  | 2.690912008  | 2.301410675  |
| H  | 4.522846699  | 3.096504450  | 2.462952137  |
| C  | 6.269896507  | 3.712979794  | 1.421232224  |
| C  | 6.203845978  | 2.592255831  | 3.679883480  |
| H  | 5.597101212  | 2.024605036  | 4.388010025  |
| H  | 7.182576180  | 2.105321646  | 3.598967075  |
| H  | 6.354875565  | 3.594786644  | 4.094208241  |
| H  | 7.348163128  | 3.517336369  | 1.393141627  |
| H  | 6.120888710  | 4.722770214  | 1.815504551  |
| H  | 5.901943207  | 3.701613903  | 0.390820652  |
| C  | 2.688353777  | -1.439804673 | 1.109638095  |
| H  | 1.863250852  | -0.738111556 | 1.281468868  |
| C  | 2.690126657  | -2.433684587 | 2.290624857  |
| C  | 2.381439686  | -2.224393368 | -0.181121260 |
| H  | 2.491059780  | -1.615636945 | -1.082022667 |
| H  | 3.040650368  | -3.093173265 | -0.285251856 |
| H  | 1.354786754  | -2.603908777 | -0.148088276 |
| H  | 3.583326578  | -3.067418575 | 2.257509708  |
| H  | 1.811376810  | -3.086342812 | 2.236055374  |
| H  | 2.663566351  | -1.920269966 | 3.250782728  |
| C  | 7.333477497  | -0.862615764 | -0.828742385 |
| H  | 6.990985394  | -1.811148882 | -1.263720512 |
| C  | 8.627585411  | -1.148669958 | -0.045262933 |
| C  | 7.593266010  | 0.115433186  | -1.990420222 |
| H  | 6.678737164  | 0.298078656  | -2.564302683 |
| H  | 7.952939034  | 1.081619740  | -1.619237900 |
| H  | 8.352218628  | -0.283532292 | -2.672599316 |
| H  | 9.030595779  | -0.232122108 | 0.399910837  |
| H  | 9.397034645  | -1.563683152 | -0.705657005 |
| H  | 8.449129105  | -1.862928748 | 0.764862418  |
| C  | 2.170083284  | 5.244391918  | 3.321387768  |
| C  | 1.170358658  | 6.193541050  | 3.555246353  |
| C  | 2.680560827  | 4.471574783  | 4.365835667  |
| C  | 0.656024873  | 6.338082314  | 4.848465919  |
| C  | 2.158730507  | 4.631363869  | 5.654344559  |
| C  | 1.141375184  | 5.554655552  | 5.897875786  |
| H  | 0.806650460  | 6.823253155  | 2.750488758  |
| H  | 3.452627659  | 3.730934858  | 4.193059444  |
| H  | -0.125325382 | 7.071865082  | 5.030709267  |
| H  | 2.544424772  | 4.015820980  | 6.462956905  |
| H  | 0.734571517  | 5.668239117  | 6.898735523  |
| Cl | 3.897809029  | 7.163503170  | 1.403810620  |
| O  | 0.316704303  | 1.217716336  | 5.894507408  |
| C  | -0.733741283 | 0.257301509  | 5.779339790  |
| H  | -1.306207657 | 0.396756560  | 4.852564812  |
| H  | -0.338776380 | -0.767587006 | 5.800006866  |
| H  | -1.393321991 | 0.409595668  | 6.636751175  |
| C  | -0.216310874 | 2.761962891  | 3.668472290  |
| H  | -0.582432568 | 2.883198977  | 4.686778069  |
| H  | 0.034522016  | 3.757260084  | 3.301699877  |

H -1.031284094 2.353594065 3.062637568  
C 2.659992933 -0.222799927 6.433670521  
H 3.588201761 0.132076979 6.895527840  
H 1.840314507 -0.013129462 7.120106697  
H 2.758328199 -1.310010433 6.326015472  
C 4.643692970 -0.438468397 4.373289108  
H 5.159831047 -0.027366595 5.247901440  
H 4.402381897 -1.479173183 4.618086815  
H 5.348669052 -0.449580401 3.546229362  
H -1.636238694 1.815836549 0.402491301  
H -1.094349623 4.056681633 -0.807610929  
H 3.049276590 0.849577487 -1.990023255  
H 3.970185518 3.239880085 -2.067414999

=====  
L2\_100  
=====

C 4.402572632 0.954235494 2.641842127  
C 4.468608379 -0.062697761 1.662331223  
C 5.686803818 -0.296245724 1.013899922  
C 6.838066101 0.431035995 1.316872716  
C 6.748476982 1.431476831 2.290148497  
C 5.552507401 1.723337412 2.951716423  
C 3.163591385 1.127939463 3.470119238  
C 2.141483307 2.117394686 3.222086430  
C 1.129255414 2.322539091 4.189252853  
C 1.003782988 1.385756135 5.230078220  
C 1.917584777 0.354081988 5.437068462  
C 3.030565023 0.258640736 4.577383041  
H 5.743458271 -1.071680427 0.253282487  
H 7.631710529 2.018166304 2.519577265  
P 2.153172255 3.333863258 1.761852264  
C 0.379189938 3.030824661 1.144467831  
C 0.115100712 1.543987632 0.846738577  
C -0.162742838 3.941255093 0.026542529  
H -0.202002928 3.284662724 2.028554440  
H 0.343867004 0.909580410 1.706973314  
H 0.695339561 1.179906607 -0.005063753  
H 0.083178319 4.990314007 0.182131901  
H 0.183978289 3.649658442 -0.964593828  
C 3.303109169 2.796603680 0.345082581  
C 4.651082039 3.534224033 0.405249298  
C 2.705013752 3.018645048 -1.054552794  
H 3.483816385 1.734369278 0.480702609  
H 5.095837593 3.527921677 1.394140005  
H 4.541063309 4.576833248 0.094142564  
H 1.842497587 2.385388374 -1.263818502  
H 2.419091463 4.062267303 -1.213234544  
Pd 2.930758715 5.333558559 2.620426655  
C 5.502238750 2.862415314 3.977661848  
H 4.499985218 3.307601213 3.919488192  
C 6.514708042 3.992906094 3.718158722  
C 5.675820827 2.349785566 5.421136379  
H 4.861831665 1.687007308 5.716281891  
H 6.621232986 1.804180026 5.520881176  
H 5.693518639 3.193559647 6.118830681  
H 7.532926559 3.688211679 3.986952782  
H 6.250700951 4.864913940 4.323181629

H 6.524325848 4.317213535 2.673930883  
C 3.254076004 -0.918079317 1.295559049  
H 2.387091637 -0.513141632 1.826884270  
C 3.440428495 -2.380908489 1.743259311  
C 2.934272051 -0.881769061 -0.212150544  
H 2.792256355 0.137083560 -0.581781030  
H 3.735221148 -1.338263273 -0.803279221  
H 2.015593052 -1.443095922 -0.415355414  
H 4.289590359 -2.839167833 1.224024892  
H 2.547381878 -2.971725702 1.509898305  
H 3.626758337 -2.456314325 2.815982103  
C 8.143220901 0.167699069 0.580386817  
H 7.972009182 -0.680082679 -0.096671678  
C 9.277309418 -0.227571085 1.543035746  
C 8.545960426 1.379959345 -0.281029701  
H 7.753970146 1.639809012 -0.991452575  
H 8.734745026 2.259871244 0.344019443  
H 9.459585190 1.169187903 -0.848110378  
H 9.515090942 0.589882612 2.232650280  
H 10.190177917 -0.468434036 0.987215340  
H 9.000484467 -1.100654721 2.142496586  
C 1.851096511 6.437963486 1.391228676  
C 2.295674801 6.708093166 0.095394567  
C 0.661363065 6.990579128 1.871356726  
C 1.522406459 7.525769234 -0.736009598  
C -0.099497780 7.808546066 1.029583693  
C 0.323382914 8.070940971 -0.274872959  
H 3.231564283 6.300165176 -2.269553304  
H 0.329010248 6.799769402 2.886646748  
H 1.865335941 7.735370159 -1.746144652  
H -1.025406480 8.240813255 1.400705099  
H -0.274281591 8.703402519 -0.925164461  
Cl 4.049058914 7.061032295 3.749151230  
O -0.036023736 1.551904440 6.130924702  
C -1.250075459 0.914637446 5.733144760  
H -1.594470739 1.273153186 4.754034519  
H -1.128491282 -0.175997853 5.683019638  
H -1.997444630 1.160896897 6.490801811  
C 0.216988266 3.533591747 4.286165714  
H -0.811814964 3.324696779 3.970393658  
H 0.160354570 3.840172291 5.333518982  
H 0.590867579 4.382053852 3.710589409  
C 1.742815614 -0.594359100 6.597693443  
H 2.621920109 -0.585097790 7.251737118  
H 0.876191735 -0.319829047 7.198647976  
H 1.617600441 -1.627884030 6.252133369  
C 4.073306561 -0.789864182 4.912745953  
H 4.505609035 -0.602433681 5.902722359  
H 3.624717712 -1.788711429 4.957170486  
H 4.891931534 -0.816525042 4.196737766  
H -0.944547296 1.407471061 0.600483477  
H -1.255947471 3.853166103 0.020559495  
H 3.475904226 2.772999048 -1.794538379  
H 5.359238148 3.045674086 -0.273815006

=====  
L2\_110  
=====

C 4.363881111 0.895536065 2.607758760  
C 4.449349403 -0.095946409 1.603270411  
C 5.672165871 -0.296704620 0.952900469  
C 6.813583374 0.435242951 1.277771592  
C 6.712531090 1.394665360 2.289914608  
C 5.512778282 1.652096510 2.958503723  
C 3.107262850 1.061137438 3.414018154  
C 2.141483545 2.117394686 3.222086430  
C 1.115913033 2.310686350 4.176024914  
C 0.947176337 1.337884665 5.177158833  
C 1.817323089 0.262988538 5.344420910  
C 2.928454638 0.153248027 4.483355522  
H 5.738205910 -1.047304034 0.168637246  
H 7.590841293 1.977572918 2.546997070  
P 2.153172255 3.333863258 1.761852264  
C 0.405825675 2.970643520 1.104254723  
C 0.189127058 1.479765058 0.793962061  
C -0.136655644 3.865339756 -0.026157411  
H -0.196298048 3.208775520 1.980227828  
H 0.436359227 0.843483865 1.647533774  
H 0.782111108 1.146784902 -0.061625719  
H 0.095972903 4.918931007 0.119712494  
H 0.223881528 3.565543652 -1.010230422  
C 3.371520042 2.870973110 0.384228438  
C 4.686371326 3.655445337 0.523921847  
C 2.809751511 3.116506338 -1.026314735  
H 3.586706161 1.812305093 0.493829131  
H 5.078543186 3.644855499 1.535310268  
H 4.552035809 4.700143814 0.230078429  
H 1.982014298 2.453085661 -1.280435681  
H 2.481986761 4.151073933 -1.161132693  
Pd 2.746014833 5.380000591 2.657637358  
C 5.466713428 2.731928587 4.046370983  
H 4.474153042 3.196027517 4.010672569  
C 6.500513554 3.857785225 3.865042210  
C 5.627618313 2.122923613 5.453800678  
H 4.812721729 1.439268947 5.694387436  
H 6.573047638 1.573018551 5.525893211  
H 5.636281967 2.916727781 6.208151340  
H 7.513897896 3.515550137 4.104602337  
H 6.259553909 4.685376167 4.538191795  
H 6.513260841 4.260012150 2.848615646  
C 3.246943474 -0.947922468 1.192148805  
H 2.376411200 -0.590057492 1.750643253  
C 3.455759764 -2.434073210 1.543032050  
C 2.924415827 -0.823403955 -0.310527772  
H 2.791383266 0.215495363 -0.620673776  
H 3.723670959 -1.249904275 -0.926069081  
H 2.002621889 -1.366280794 -0.546659410  
H 4.299871445 -2.850393772 0.982144117  
H 2.564695358 -3.017565250 1.285188317  
H 3.660358429 -2.577643871 2.605358839  
C 8.119162560 0.219476730 0.526970208  
H 7.955602646 -0.600684404 -0.185002044  
C 9.262234688 -0.201731279 1.467712045  
C 8.502377510 1.472304463 -0.284218848  
H 7.702796936 1.753181577 -0.977982163  
H 8.685637474 2.326867580 0.376648307

H 9.414354324 1.296770573 -0.865707517  
H 9.491952896 0.588324428 2.191173315  
H 10.175980568 -0.406141251 0.898887157  
H 8.999320030 -1.103507400 2.029762268  
C 1.708541393 6.438261032 1.354307413  
C 2.229784489 6.737404346 0.094320498  
C 0.467724770 6.939143658 1.754982352  
C 1.481573582 7.528663158 -0.784480333  
C -0.266774386 7.732338905 0.867213428  
C 0.232749254 8.021235466 -0.404141217  
H 3.205576897 6.373529911 -0.206579372  
H 0.074337468 6.725491047 2.743749380  
H 1.884069920 7.760485172 -1.767467260  
H -1.232656360 8.124155045 1.176414490  
H -0.344366908 8.634151459 -1.090813041  
Cl 3.686105967 7.159336090 3.862865925  
O -0.098334081 1.501711488 6.071938992  
C -1.315999985 0.881507993 5.657067776  
H -1.648545265 1.252724648 4.678796768  
H -1.206083775 -0.209850892 5.597335339  
H -2.067059517 1.128519535 6.410786152  
C 0.214041069 3.527871370 4.284815788  
H -0.813601971 3.325308561 3.961906672  
H 0.154377803 3.825303316 5.334711075  
H 0.592079818 4.380274773 3.716946125  
C 1.600230217 -0.722140312 6.466638565  
H 2.470817089 -0.760115147 7.131258011  
H 0.734569252 -0.445702523 7.067858696  
H 1.452563405 -1.738774300 6.082811832  
C 3.919453621 -0.955201507 4.778489113  
H 4.326954842 -0.851018786 5.790787220  
H 3.431923389 -1.936133385 4.742285252  
H 4.759052753 -0.966325581 4.086913109  
H -0.864970028 1.311612368 0.543230951  
H -1.228612542 3.764687538 -0.042419896  
H 3.612379313 2.927979231 -1.749083042  
H 5.445579052 3.208042622 -0.127429739

=====  
L2\_120  
=====

C 4.128831863 0.655424833 2.412422180  
C 4.066932201 -0.218398347 1.302630901  
C 5.231613159 -0.453680009 0.564663410  
C 6.455232143 0.134170011 0.894234240  
C 6.504416466 0.949235022 2.028123379  
C 5.370702267 1.213213205 2.804667234  
C 2.934214354 0.915402293 3.286961079  
C 2.148542166 2.124589920 3.222582102  
C 1.229950309 2.412151575 4.261738300  
C 1.008358359 1.433609605 5.247884750  
C 1.724302173 0.240437031 5.310922623  
C 2.726553202 0.007007255 4.348057747  
H 5.187948704 -1.115125179 -0.297389239  
H 7.451471329 1.396828175 2.317714691  
P 2.107067347 3.321904182 1.750683427  
C 0.283841044 3.071370602 1.262980700  
C -0.075681850 1.593506098 1.046278715

C -0.291271389 3.940280199 0.126012549  
H -0.211459443 3.403874636 2.176201105  
H 0.157889977 0.978838444 1.918689966  
H 0.444586307 1.175044656 0.179515511  
H 0.108924545 4.951674461 0.106324576  
H -0.134688571 3.487762451 -0.854443491  
C 3.174358130 2.790925026 0.289677173  
C 4.564908028 3.442746162 0.356612682  
C 2.521156788 3.142202377 -1.057766199  
H 3.296804428 1.714830875 0.347602040  
H 5.073782444 3.251108885 1.296510577  
H 4.500309467 4.527316093 0.218129545  
H 1.633003592 2.543070555 -1.264569283  
H 2.248216867 4.199693203 -1.121168017  
Pd 2.837872267 5.352136612 2.594349861  
C 5.527985096 2.040574312 4.083952427  
H 4.548614979 2.122106791 4.561126709  
C 6.025014877 3.473484755 3.825623274  
C 6.458439350 1.318364978 5.079697609  
H 6.109142780 0.301610440 5.285397530  
H 7.481248379 1.247520804 4.692316532  
H 6.498662472 1.865062356 6.028072357  
H 6.986094952 3.483842611 3.299016953  
H 6.155520439 4.008137226 4.771791458  
H 5.316440582 4.054347992 3.226571798  
C 2.770317316 -0.921389699 0.898854375  
H 1.958851099 -0.474950969 1.480887771  
C 2.818893433 -2.424880266 1.237892032  
C 2.428017139 -0.751941860 -0.594355702  
H 2.414775610 0.296141744 -0.903533638  
H 3.148039579 -1.274147153 -1.233199358  
H 1.439976692 -1.176729202 -0.803360522  
H 3.634137154 -2.915251493 0.693876445  
H 1.881227493 -2.913697243 0.949403226  
H 2.976246119 -2.599107265 2.303532839  
C 7.690587521 -0.101019643 0.038704358  
H 7.407396317 -0.797402978 -0.762059450  
C 8.830887794 -0.752884746 0.841345489  
C 8.157857895 1.208524585 -0.624473989  
H 7.357282639 1.655032277 -1.223635674  
H 8.458246231 1.944590926 0.129614741  
H 9.017693520 1.028866887 -1.279431701  
H 9.177325249 -0.093518361 1.644939661  
H 9.688500404 -0.964372396 0.193178937  
H 8.505616188 -1.693237424 1.297552466  
C 1.682391882 6.433883667 1.411488295  
C 2.118029118 6.789806366 0.133332148  
C 0.454548478 6.884325027 1.900742054  
C 1.295078278 7.584854603 -0.673594415  
C -0.355695099 7.680796623 1.084473133  
C 0.055761036 8.025311470 -0.204786837  
H 3.083814144 6.462124825 -0.236842185  
H 0.126778767 6.630753517 2.903584242  
H 1.630890250 7.858398438 -1.670869708  
H -1.312206507 8.031803131 1.463612080  
H -0.580040753 8.639775276 -0.835768998  
Cl 3.823044538 7.163118362 3.713301659  
O 0.068941608 1.708789468 6.228821278

C -1.245873690 1.249421954 5.913429260  
H -1.611676812 1.682467699 4.973020554  
H -1.277079344 0.154693067 5.828829288  
H -1.894604325 1.567082882 6.732785225  
C 0.475934565 3.714472055 4.465028286  
H -0.595524490 3.613803864 4.256832123  
H 0.560375631 4.011727810 5.513257980  
H 0.870268345 4.528051853 3.854216099  
C 1.469535589 -0.742684960 6.427161217  
H 2.392403841 -0.970655322 6.971759796  
H 0.749137461 -0.344688147 7.141654968  
H 1.089189291 -1.696025610 6.039463520  
C 3.595877647 -1.217778206 4.539936066  
H 4.136114120 -1.156221151 5.492658138  
H 2.990556002 -2.130150557 4.585351944  
H 4.334762096 -1.335321426 3.750956059  
H -1.151586175 1.507790327 0.852291644  
H -1.375153065 4.016677380 0.271469146  
H 3.245571613 2.939075232 -1.854923725  
H 5.189985752 3.028294086 -0.442083597

=====  
L2\_130  
=====

C 3.661457777 0.320101380 2.121409893  
C 3.211635113 -0.513707697 1.071349502  
C 4.140336990 -0.976268828 0.132776558  
C 5.497709274 -0.655031979 0.207144573  
C 5.926867962 0.121327259 1.286113739  
C 5.042168140 0.601911545 2.256498337  
C 2.739530087 0.814004719 3.201042175  
C 2.159063101 2.134896994 3.226778507  
C 1.552163124 2.599850178 4.415861607  
C 1.383240700 1.702027678 5.482522488  
C 1.887717366 0.402900189 5.467214584  
C 2.606968641 -0.022537885 4.332667828  
H 3.798905134 -1.606470704 -0.684694469  
H 6.982136250 0.365075141 1.374639869  
P 2.052949667 3.331696749 1.758200884  
C 0.157829866 3.425431490 1.634605289  
C -0.516589642 2.101856470 1.243342876  
C -0.346374959 4.639922142 0.837232828  
H -0.124009639 3.612781763 2.672664642  
H -0.255932599 1.308894396 1.950154185  
H -0.248868585 1.761507630 0.240632296  
H 0.103228733 5.564880848 1.212094903  
H -0.139008000 4.570713997 -0.231720820  
C 2.644797325 2.576035261 0.139963552  
C 4.150386810 2.769819736 -0.108719796  
C 1.885213852 3.089432240 -1.097409487  
H 2.441251040 1.514545202 0.243330628  
H 4.752605915 2.680020332 0.789530158  
H 4.346574783 3.748707294 -0.547017515  
H 0.822166383 2.847023964 -1.093899846  
H 2.006386042 4.167021275 -1.226093650  
Pd 2.883201838 5.350214005 2.539803028  
C 5.599203587 1.379229665 3.452212334  
H 4.787485600 1.522872567 4.169390202

|    |              |              |              |
|----|--------------|--------------|--------------|
| C  | 6.108806133  | 2.781140327  | 3.069942713  |
| C  | 6.698549747  | 0.573675275  | 4.172463894  |
| H  | 6.350748062  | -0.432394207 | 4.428148746  |
| H  | 7.596977711  | 0.468967915  | 3.554365635  |
| H  | 6.993374348  | 1.079967380  | 5.097940445  |
| H  | 6.864904404  | 2.730498791  | 2.277818441  |
| H  | 6.561801434  | 3.270675182  | 3.938883066  |
| H  | 5.293118477  | 3.422877550  | 2.723759174  |
| C  | 1.748252273  | -0.943498611 | 0.955209017  |
| H  | 1.165543795  | -0.297120720 | 1.617605567  |
| C  | 1.553371906  | -2.395815372 | 1.436846972  |
| C  | 1.175128937  | -0.797674716 | -0.468005776 |
| H  | 1.336564660  | 0.200749561  | -0.883308828 |
| H  | 1.625386715  | -1.518562555 | -1.158570409 |
| H  | 0.096474491  | -0.987771809 | -0.458476871 |
| H  | 2.150548220  | -3.085341930 | 0.829377413  |
| H  | 0.501877666  | -2.692007542 | 1.347721457  |
| H  | 1.852094889  | -2.522802830 | 2.478985310  |
| C  | 6.473310471  | -1.130831122 | -0.858699143 |
| H  | 5.907798767  | -1.750043988 | -1.568029404 |
| C  | 7.591642380  | -2.006252527 | -0.264970094 |
| C  | 7.059646130  | 0.059617106  | -1.641028047 |
| H  | 6.267820835  | 0.661631405  | -2.098764658 |
| H  | 7.636132240  | 0.716698229  | -0.980352640 |
| H  | 7.728876591  | -0.288038164 | -2.435905218 |
| H  | 8.212585449  | -1.435746193 | 0.434647709  |
| H  | 8.247254372  | -2.385937691 | -1.056478381 |
| H  | 7.177507877  | -2.862046003 | 0.277610302  |
| C  | 3.755356073  | 5.936474800  | 0.860052884  |
| C  | 5.150777817  | 5.935355663  | 0.803424656  |
| C  | 2.996667862  | 6.384444237  | -0.222154349 |
| C  | 5.786317348  | 6.344541550  | -0.372888505 |
| C  | 3.646329880  | 6.793970108  | -1.393367887 |
| C  | 5.039100170  | 6.764261246  | -1.476278305 |
| H  | 5.739656448  | 5.621653557  | 1.658064127  |
| H  | 1.913769007  | 6.416014194  | -0.166993216 |
| H  | 6.872512341  | 6.337034225  | -0.420899391 |
| H  | 3.054988623  | 7.135651112  | -2.239513159 |
| H  | 5.539278030  | 7.079046726  | -2.387861490 |
| Cl | 3.556786776  | 7.259157181  | 3.734837770  |
| O  | 0.747375131  | 2.173618555  | 6.619892597  |
| C  | -0.656199753 | 1.909902692  | 6.645892620  |
| H  | -1.164886236 | 2.347413063  | 5.775902271  |
| H  | -0.861349881 | 0.831218183  | 6.662684441  |
| H  | -1.044557452 | 2.366578102  | 7.558843136  |
| C  | 1.137465000  | 4.029747486  | 4.719823837  |
| H  | 0.079360306  | 4.112101078  | 4.986992359  |
| H  | 1.708808661  | 4.400666237  | 5.574828148  |
| H  | 1.291655540  | 4.737503529  | 3.895311594  |
| C  | 1.726817012  | -0.487041771 | 6.675709248  |
| H  | 2.689793110  | -0.897779047 | 6.995227337  |
| H  | 1.303881884  | 0.067196816  | 7.513788700  |
| H  | 1.074330330  | -1.342155218 | 6.458038330  |
| C  | 3.298027754  | -1.368191481 | 4.413196564  |
| H  | 4.093628407  | -1.339231253 | 5.168715477  |
| H  | 2.603550196  | -2.157477617 | 4.720568180  |
| H  | 3.754845142  | -1.661637664 | 3.471048117  |
| H  | -1.606279612 | 2.223428488  | 1.268423080  |

|   |              |             |              |
|---|--------------|-------------|--------------|
| H | -1.433333516 | 4.723555565 | 0.956079364  |
| H | 2.326359034  | 2.607534885 | -1.978122234 |
| H | 4.490025520  | 1.998096347 | -0.806813955 |

=====

L2\_140

=====

|    |              |              |              |
|----|--------------|--------------|--------------|
| C  | 4.038429260  | 0.299102455  | 2.366185904  |
| C  | 3.586330652  | -0.489486247 | 1.283763170  |
| C  | 4.527287006  | -1.098315597 | 0.446223557  |
| C  | 5.899261951  | -0.950535536 | 0.645649552  |
| C  | 6.324715614  | -0.165415898 | 1.721609354  |
| C  | 5.428444862  | 0.468499660  | 2.587288618  |
| C  | 3.051165581  | 0.856246650  | 3.357028961  |
| C  | 2.407206297  | 2.111678362  | 3.223000050  |
| C  | 1.593999147  | 2.579047680  | 4.294401646  |
| C  | 1.275319934  | 1.705498099  | 5.343025684  |
| C  | 1.808969140  | 0.414895982  | 5.427772999  |
| C  | 2.722341776  | 0.002625188  | 4.444427967  |
| H  | 4.182873249  | -1.699422240 | -0.391549885 |
| H  | 7.389947414  | -0.030352695 | 1.876671791  |
| P  | 2.449761391  | 3.317929029  | 1.760542870  |
| C  | 0.798635542  | 2.921710491  | 0.886207640  |
| C  | 0.262827396  | 4.178059101  | 0.181897745  |
| C  | -0.305017829 | 2.289543390  | 1.748809338  |
| H  | 1.077251315  | 2.180442572  | 0.129788309  |
| H  | 0.987945497  | 4.611887455  | -0.508018970 |
| H  | 0.001976565  | 4.949128628  | 0.915113509  |
| H  | 0.021528704  | 1.389164805  | 2.272223711  |
| H  | -0.693982780 | 2.988523960  | 2.494716406  |
| C  | 3.717625856  | 2.810052395  | 0.475026727  |
| C  | 5.129058838  | 3.237396240  | 0.900923491  |
| C  | 3.407912493  | 3.349161148  | -0.932658672 |
| H  | 3.676183939  | 1.723715186  | 0.434125781  |
| H  | 5.275169849  | 3.169044971  | 1.977800131  |
| H  | 5.318265915  | 4.271026611  | 0.611043751  |
| H  | 2.471044540  | 2.964488983  | -1.345165372 |
| H  | 3.382188559  | 4.441158295  | -0.955132782 |
| Pd | 2.585518122  | 5.493089199  | 2.650661230  |
| C  | 5.966300011  | 1.332178473  | 3.734197378  |
| H  | 5.235361099  | 2.129992723  | 3.912906885  |
| C  | 7.320133686  | 1.997163057  | 3.418081045  |
| C  | 6.102521896  | 0.538591444  | 5.049901962  |
| H  | 5.131674290  | 0.247417703  | 5.448794842  |
| H  | 6.700117588  | -0.366764218 | 4.893953800  |
| H  | 6.604147911  | 1.149162054  | 5.808714390  |
| H  | 8.139264107  | 1.269625783  | 3.445324898  |
| H  | 7.541871071  | 2.757447004  | 4.173943043  |
| H  | 7.333481789  | 2.479351759  | 2.437802553  |
| C  | 2.099408627  | -0.673357964 | 0.986873627  |
| H  | 1.552338719  | 0.073734239  | 1.566958308  |
| C  | 1.597442269  | -2.059577465 | 1.432844520  |
| C  | 1.759193063  | -0.446848065 | -0.498944223 |
| H  | 2.195132017  | 0.480197310  | -0.883293867 |
| H  | 2.124789715  | -1.265889406 | -1.127411246 |
| H  | 0.673054218  | -0.395509124 | -0.633800626 |
| H  | 2.144356966  | -2.853297234 | 0.911478817  |
| H  | 0.531912446  | -2.176404238 | 1.203842282  |

|    |              |              |              |    |              |              |              |
|----|--------------|--------------|--------------|----|--------------|--------------|--------------|
| H  | 1.732003331  | -2.208427668 | 2.506039619  | C  | 1.832169414  | 0.427264005  | 5.435974598  |
| C  | 6.900425911  | -1.586276412 | -0.307415903 | C  | 2.607773781  | -0.051940724 | 4.367098808  |
| H  | 6.329433441  | -2.182515383 | -1.031820774 | H  | 3.577107191  | -1.797771811 | -0.573948681 |
| C  | 7.866814613  | -2.537908554 | 0.419891477  | H  | 7.064504623  | -0.349776357 | 1.412127376  |
| C  | 7.671737671  | -0.508846104 | -1.094309449 | P  | 2.421495199  | 3.316263199  | 1.765220284  |
| H  | 6.986046314  | 0.150596142  | -1.636556864 | C  | 0.704112828  | 2.960782290  | 1.015428185  |
| H  | 8.270931244  | 0.113930143  | -0.420347214 | C  | 0.176708579  | 4.196074009  | 0.268125772  |
| H  | 8.352632523  | -0.967649221 | -1.819970846 | C  | -0.362909317 | 2.460181952  | 2.001670599  |
| H  | 8.488407135  | -1.996876836 | 1.141984582  | H  | 0.888900638  | 2.159100771  | 0.294185370  |
| H  | 8.538512230  | -3.026762486 | -0.294373274 | H  | 0.873372853  | 4.564988136  | -0.485061020 |
| H  | 7.321064949  | -3.314874649 | 0.964608788  | H  | -0.015962221 | 5.014544487  | 0.970063567  |
| C  | 3.523182154  | 6.376846313  | 1.138298154  | H  | -0.061094068 | 1.563254595  | 2.545149326  |
| C  | 4.894546032  | 6.625917435  | 1.238461137  | H  | -0.625381649 | 3.226681709  | 2.737225056  |
| C  | 2.806730032  | 6.815365791  | 0.022866698  | C  | 3.603210926  | 2.769189358  | 0.417112947  |
| C  | 5.557513237  | 7.269575596  | 0.188248932  | C  | 5.042999268  | 3.171082258  | 0.766797245  |
| C  | 3.480644703  | 7.459278584  | -1.022303462 | C  | 3.228750944  | 3.305626631  | -0.975166440 |
| C  | 4.856810093  | 7.678261757  | -0.948687673 | H  | 3.535794735  | 1.683524132  | 0.386903137  |
| H  | 5.445561886  | 6.328315258  | 2.124488831  | H  | 5.262434006  | 3.055058241  | 1.828097939  |
| H  | 1.733732343  | 6.673936844  | -0.037427790 | H  | 5.223336697  | 4.214094162  | 0.503862023  |
| H  | 6.625842571  | 7.456203461  | 0.267324358  | H  | 2.266692400  | 2.929098129  | -1.333369851 |
| H  | 2.919943333  | 7.793900967  | -1.891802549 | H  | 3.214126110  | 4.397853374  | -1.003266215 |
| H  | 5.376280785  | 8.177942276  | -1.761564374 | Pd | 2.585353613  | 5.508906841  | 2.614283800  |
| Cl | 2.539943933  | 7.537541389  | 3.826604843  | C  | 5.898744106  | 1.030872822  | 3.425594091  |
| O  | 0.428353459  | 2.138346910  | 6.351358891  | H  | 5.258064270  | 1.883973241  | 3.678083420  |
| C  | -0.956283450 | 1.935856104  | 6.060719013  | C  | 7.284624577  | 1.580798626  | 3.036503077  |
| H  | -1.260309458 | 2.478463888  | 5.155333519  | C  | 6.049289227  | 0.183715925  | 4.706570148  |
| H  | -1.182555795 | 0.869706810  | 5.924705982  | H  | 5.084427357  | -0.035301190 | 5.162061214  |
| H  | -1.515090942 | 2.319556713  | 6.917121887  | H  | 6.552568436  | -0.764110386 | 4.484516144  |
| C  | 1.112206101  | 4.011126995  | 4.424988747  | H  | 6.651804447  | 0.721986532  | 5.446576118  |
| H  | 0.461859405  | 4.354568005  | 3.616074085  | H  | 8.032909393  | 0.781546593  | 2.988865614  |
| H  | 0.565972567  | 4.154769421  | 5.357244015  | H  | 7.624364853  | 2.292330027  | 3.795995474  |
| H  | 1.980206370  | 4.691030979  | 4.531392097  | H  | 7.278722763  | 2.092440844  | 2.071253300  |
| C  | 1.427858114  | -0.491897404 | 6.572289944  | C  | 1.689263105  | -0.666340590 | 0.976855159  |
| H  | 2.315238237  | -0.858022332 | 7.100278854  | H  | 1.235800147  | 0.095384642  | 1.615193844  |
| H  | 0.800009727  | 0.032728054  | 7.292189121  | C  | 1.138931394  | -2.032483339 | 1.428060174  |
| H  | 0.886542559  | -1.376947284 | 6.215085030  | C  | 1.252492428  | -0.385027170 | -0.474842906 |
| C  | 3.302503586  | -1.393509507 | 4.576893806  | H  | 1.738266706  | 0.506949127  | -0.880891502 |
| H  | 3.847510099  | -1.513217449 | 5.519746780  | H  | 1.498327374  | -1.220750093 | -1.138679743 |
| H  | 2.501607656  | -2.142087460 | 4.590799332  | H  | 0.167589843  | -0.240028754 | -0.525174975 |
| H  | 3.983958960  | -1.645492911 | 3.766875267  | H  | 1.596546173  | -2.842602253 | 0.848999262  |
| H  | -0.639987707 | 3.931123734  | -0.389224112 | H  | 0.054535206  | -2.079317570 | 1.275192499  |
| H  | -1.142480612 | 2.015559196  | 1.096652746  | H  | 1.340327978  | -2.220414400 | 2.484210014  |
| H  | 4.212391853  | 3.023059845  | -1.602344871 | C  | 6.294961452  | -1.851943493 | -0.727841616 |
| H  | 5.868781090  | 2.591297388  | 0.418154299  | H  | 5.626570702  | -2.379261494 | -1.421727538 |

=====  
L2\_150  
=====

|   |             |              |             |   |             |              |              |
|---|-------------|--------------|-------------|---|-------------|--------------|--------------|
| C | 3.792152882 | 0.175651997  | 2.198733807 | H | 7.803274155 | -0.277872086 | -0.905895948 |
| C | 3.203191996 | -0.572392941 | 1.153549671 | H | 7.690203667 | -1.328585386 | -2.325955629 |
| C | 4.029977798 | -1.225455046 | 0.231708452 | H | 7.930167675 | -2.430984497 | 0.605991721  |
| C | 5.420096397 | -1.159381747 | 0.306290507 | H | 7.800857544 | -3.426697254 | -0.850119650 |
| C | 5.983767986 | -0.414688438 | 1.347594261 | H | 6.645634651 | -3.641580105 | 0.480303526  |
| C | 5.206396103 | 0.252910376  | 2.299410105 | C | 3.410590410 | 6.368219376  | 1.021287799  |
| C | 2.931640387 | 0.792769492  | 3.273401976 | C | 4.790797234 | 6.589666367  | 1.018532395  |
| C | 2.439364672 | 2.124025822  | 3.233769894 | C | 2.625747204 | 6.818661213  | -0.042544670 |
| C | 1.770265341 | 2.639589071  | 4.377714634 | C | 5.389822483 | 7.215784550  | -0.079655305 |
| C | 1.442050338 | 1.770168304  | 5.426863670 | C | 3.235471249 | 7.444725513  | -1.136909723 |
|   |             |              |             | C | 4.617568016 | 7.635202885  | -1.164843798 |

H 5.399352074 6.286495686 1.864297509  
H 1.548430920 6.701708794 -0.024798797  
H 6.464594841 7.380780220 -0.078215271  
H 2.619979382 7.788923264 -1.964685798  
H 5.086760521 8.121149063 -2.015760660  
Cl 2.533357620 7.597272396 3.714802980  
O 0.731017649 2.258689404 6.511888027  
C -0.686403155 2.223365307 6.328248978  
H -0.994665444 2.829081297 5.465453148  
H -1.042643905 1.194746614 6.182044029  
H -1.130151749 2.636250734 7.236774445  
C 1.437652826 4.104548454 4.575582504  
H 0.701433539 4.505836487 3.870084047  
H 1.040289879 4.284676075 5.574418545  
H 2.365049839 4.709332943 4.554349899  
C 1.451614261 -0.466596842 6.590734959  
H 2.334722757 -0.941423535 7.032250404  
H 0.947606087 0.101406455 7.372401714  
H 0.788421333 -1.277384043 6.264122486  
C 3.057397127 -1.499692798 4.429380417  
H 3.674858332 -1.686652303 5.315097809  
H 2.193291903 -2.168823242 4.513423443  
H 3.633533955 -1.799843192 3.556414843  
H -0.765536070 3.950364351 -0.236018032  
H -1.275666475 2.224820375 1.442141056  
H 3.991936445 2.965199232 -1.684907079  
H 5.741953373 2.541133881 0.207128376

=====  
L2\_160  
=====

C 3.038432837 -0.047587790 1.879661679  
C 1.978125572 -0.697290301 1.206029415  
C 2.279192448 -1.564054012 0.146849722  
C 3.586840868 -1.801127791 -0.271710694  
C 4.620554924 -1.151104689 0.410724998  
C 4.378386497 -0.287575066 1.480827451  
C 2.752015829 0.750050664 3.126724958  
C 2.477507353 2.145184994 3.145968437  
C 2.178220987 2.746172190 4.402271748  
C 2.073303223 1.947795630 5.551968575  
C 2.348788977 0.579869926 5.541193485  
C 2.704886675 -0.016267044 4.321309566  
H 1.468343854 -2.067097902 -0.373241276  
H 5.646072865 -1.326591492 0.099571705  
P 2.437528133 3.328756809 1.671783090  
C 0.680041611 3.074069738 1.037870884  
C 0.325187385 4.088149071 -0.058590092  
C -0.377724946 3.130650043 2.149432659  
H 0.680291831 2.069664955 0.611719549  
H 1.111558795 4.217669964 -0.804949164  
H 0.130501121 5.066311359 0.389431924  
H -0.181171373 2.427224159 2.961844444  
H -0.444816411 4.137759686 2.574688911  
C 3.583533764 2.675096273 0.308112651  
C 4.537409306 3.751264334 -0.224674866  
C 2.916002989 1.942121029 -0.865004241  
H 4.182392597 1.947972536 0.846840441

H 5.080398560 4.254641056 0.575705767  
H 4.013200283 4.518158913 -0.798459768  
H 2.273870468 1.123520374 -0.546346009  
H 2.338043451 2.623390198 -1.495315671  
Pd 2.688436747 5.531418800 2.460984945  
C 5.566915512 0.360878527 2.199595451  
H 5.186528206 1.212731123 2.774548531  
C 6.642129898 0.892915487 1.230366707  
C 6.223562717 -0.612285674 3.198711634  
H 5.533201218 -0.910354972 3.988025188  
H 6.563459873 -1.518720388 2.684722662  
H 7.094180107 -0.144237816 3.671254635  
H 7.185978413 0.075675651 0.744448960  
H 7.377975464 1.488427877 1.780742407  
H 6.220073700 1.523951888 0.444042802  
C 0.514918149 -0.509486616 1.609624505  
H 0.451043040 0.399676174 2.212603807  
C 0.011965950 -1.673599958 2.485845804  
C -0.426825970 -0.343547881 0.399826020  
H -0.045181986 0.374837488 -0.331774294  
H -0.580848336 -1.293018937 -0.123923667  
H -1.410144448 0.003105516 0.735459328  
H 0.135616720 -2.629910707 1.965020895  
H -1.052404761 -1.547887206 2.714843273  
H 0.554616988 -1.729672074 3.429948092  
C 3.877606869 -2.718714952 -1.449855447  
H 2.916343451 -3.122030735 -1.795513749  
C 4.764173508 -3.909864187 -1.043892980  
C 4.503555775 -1.936269164 -2.620046139  
H 3.860508680 -1.105198622 -2.927834272  
H 5.476444721 -1.518668056 -2.336829185  
H 4.659709930 -2.589169502 -3.486090660  
H 5.751131535 -3.572547913 -0.707938969  
H 4.916022778 -4.586305141 -1.892267466  
H 4.310148716 -4.480256557 -0.227306679  
C 3.308720350 6.494495392 0.828850389  
C 4.647362709 6.899514198 0.808167219  
C 2.457065105 6.838809967 -0.219989404  
C 5.141360283 7.601186275 -0.293642849  
C 2.960854292 7.544847012 -1.319718361  
C 4.303069592 7.918028355 -1.365213037  
H 5.304370403 6.677021503 1.642750621  
H 1.406405091 6.583921909 -0.192017257  
H 6.184573174 7.907579422 -0.307244897  
H 2.291995049 7.806560516 -2.136232376  
H 4.691061020 8.465380669 -2.220010996  
Cl 2.628394127 7.621884346 3.569345236  
O 1.737089038 2.542688370 6.757963657  
C 0.329473853 2.577341318 7.005279064  
H -0.199107930 3.147583723 6.229444981  
H -0.090412550 1.563686848 7.047890663  
H 0.193042904 3.068543673 7.971099854  
C 2.023134947 4.233151436 4.613919258  
H 1.206165195 4.681619167 4.034125805  
H 1.822616458 4.478657722 5.655512810  
H 2.980036974 4.747869015 4.407758236  
C 2.272354126 -0.222289279 6.817114353  
H 3.199702978 -0.778966844 6.990373135

H 2.103047371 0.428145170 7.674941063  
H 1.463710785 -0.962825775 6.774769306  
C 3.007496595 -1.503651500 4.351041794  
H 3.862219095 -1.713459611 5.004281521  
H 2.165757656 -2.066902399 4.769091129  
H 3.229047060 -1.915494800 3.369101524  
H -0.585830808 3.768028975 -0.577504873  
H -1.359134555 2.889514208 1.725133300  
H 3.701665878 1.504484296 -1.491090298  
H 5.270084858 3.275885820 -0.888567150

=====  
L2\_170  
=====

C 1.984837294 0.404711246 2.089430809  
C 0.815550447 -0.100009516 1.469667315  
C 0.949391007 -1.016563892 0.418379575  
C 2.187912226 -1.491089582 -0.005243618  
C 3.327630758 -1.015929580 0.649968684  
C 3.258450985 -0.069148786 1.674545884  
C 1.885599136 1.240163207 3.339311838  
C 1.844576836 2.663218975 3.386520386  
C 1.784275413 3.300921202 4.656762123  
C 1.627966642 2.522273302 5.814436913  
C 1.627382040 1.128019094 5.781776905  
C 1.778049588 0.486868054 4.540076256  
H 0.055369452 -1.393684149 -0.071092971  
H 4.299801826 -1.379327059 0.333650470  
P 1.762146711 3.845905781 1.913214564  
C 0.037823219 3.548121452 1.264451027  
C -0.262528330 4.270767689 -0.056571662  
C -0.997571170 3.919937134 2.336484432  
H 0.000595731 2.475731373 1.086717486  
H 0.415005744 3.982130527 -0.863604784  
H -0.206424609 5.354811192 0.054281838  
H -0.812632978 3.413131952 3.288884878  
H -0.987071693 5.000053406 2.519849539  
C 2.891227722 3.560967445 0.444797158  
C 2.687294006 2.361032248 -0.489962399  
C 4.361223221 3.775556087 0.832813203  
H 2.583838940 4.453700066 -0.113596499  
H 1.636084318 2.099064589 -0.630543351  
H 3.194721222 1.468453050 -0.135367706  
H 4.500285149 4.711798191 1.381771326  
H 4.737740040 2.968257427 1.459729791  
Pd 2.104572296 6.058481216 2.645054817  
C 4.560051441 0.425726146 2.313362122  
H 4.367707253 1.428040504 2.709565401  
C 5.721106529 0.525567830 1.303086996  
C 5.011110306 -0.448744774 3.501111507  
H 4.339244843 -0.348434806 4.352877617  
H 5.051422119 -1.504988670 3.211830616  
H 6.012304306 -0.149767518 3.831341743  
H 6.113739967 -0.464570761 1.047244072  
H 6.547920227 1.094695687 1.740904570  
H 5.426243305 1.018965244 0.373158693  
C -0.601073027 0.238944113 1.943859577  
H -0.545414805 1.127214789 2.578444481

C -1.196542978 -0.894273520 2.804831743  
C -1.572673082 0.530607283 0.779639781  
H -1.144908071 1.200644732 0.028824912  
H -1.865259409 -0.391234487 0.266010255  
H -2.489598989 0.990740240 1.162930608  
H -1.202352643 -1.838705301 2.249172688  
H -2.230764866 -0.657077193 3.079206705  
H -0.632359862 -1.047291994 3.724416733  
C 2.296713829 -2.483895063 -1.152467847  
H 1.275560975 -2.710481644 -1.487153649  
C 2.944965839 -3.805989027 -0.703380406  
C 3.055041790 -1.873192549 -2.346264601  
H 2.582646370 -0.943800628 -2.680399179  
H 4.091719151 -1.642048478 -2.076268196  
H 3.077661276 -2.571000576 -3.190771103  
H 3.977963686 -3.647971392 -0.373651177  
H 2.966634035 -4.526487827 -1.528466702  
H 2.393160820 -4.254152775 0.129082352  
C 1.934428215 6.913788319 0.852708757  
C 2.967190504 6.908160210 -0.088066183  
C 0.744841516 7.598004818 0.572972119  
C 2.790314198 7.543874264 -1.323675275  
C 0.575777769 8.226939201 -0.663747132  
C 1.593631983 8.195271492 -1.620043635  
H 3.915706396 6.429543495 0.130009666  
H -0.045467354 7.650701523 1.314912796  
H 3.600200891 7.532158375 -2.049281359  
H -0.354215562 8.749829292 -0.873718202  
H 1.459900498 8.687263489 -2.579402208  
Cl 2.426348209 8.189254761 3.623860598  
O 1.514228225 3.154256344 7.041913509  
C 0.172510728 3.516742945 7.379413605  
H -0.248357505 4.220059872 6.648615360  
H -0.475461423 2.631749630 7.434297562  
H 0.215862975 3.997694254 8.358875275  
C 1.911881924 4.791414261 4.879704952  
H 1.020705581 5.355255604 4.571926594  
H 2.067700863 5.020511627 5.933633804  
H 2.825603247 5.187437057 4.391747475  
C 1.489891052 0.341383725 7.062108517  
H 2.312274218 -0.372815460 7.175952435  
H 1.495393395 1.004526973 7.926717281  
H 0.560936928 -0.241993070 7.074747086  
C 1.811299682 -1.031576514 4.562456131  
H 2.671971798 -1.393491983 5.135057926  
H 0.924684227 -1.433690071 5.064017773  
H 1.867058992 -1.474943161 3.571064472  
H -1.279867291 4.013875008 -0.375460684  
H -2.001682758 3.642492533 1.996708512  
H 4.981172562 3.813179731 -0.070098661  
H 3.101198912 2.613390446 -1.473930240

=====  
L2\_180  
=====

C 2.274816990 -0.101457663 2.002951622  
C 1.047881961 -0.522859275 1.432499051  
C 1.073856950 -1.444710732 0.377011538







H -0.403250724 3.742839098 0.322592378  
H -1.335283995 2.790949583 -1.779032350  
H -0.278686583 1.389131308 -1.645637035  
H -2.519595861 2.146171093 0.306112379  
H -1.946906686 0.051789690 1.514575362  
H -0.641253173 -0.278322697 0.378879189  
H 0.229698405 0.730227530 2.495642185  
H -0.808655202 2.127203465 2.263990879  
H -2.546197414 0.791282415 -0.820772052  
C 3.740190029 2.577767134 0.877871752  
C 4.948971748 3.254366636 1.553474784  
C 6.261233330 2.937421799 0.818748951  
C 6.163174152 3.283080816 -0.673550785  
C 4.997606754 2.529080868 -1.328377247  
C 3.662137747 2.859305859 -0.639890313  
H 3.872577429 1.500238776 0.989330769  
H 5.017365456 2.917745352 2.594378710  
H 4.796174526 4.336667061 1.579754233  
H 7.086497307 3.484240532 1.291109085  
H 6.490789890 1.866916656 0.927498698  
H 5.997355938 4.363050938 -0.787702382  
H 4.926995277 2.780088186 -2.393442631  
H 5.187571049 1.446662784 -1.269242287  
H 2.865378141 2.258198977 -1.092780232  
H 3.417403460 3.906423807 -0.822800159  
H 7.105604172 3.047161341 -1.182561398  
Pd 1.820933104 5.319024086 2.148926973  
C -0.819587708 3.905461311 4.375627995  
H -0.376854390 2.979614735 4.001571178  
C -1.700863957 4.498492241 3.260399103  
C -1.663543344 3.533721447 5.608385086  
H -1.051157475 3.058578253 6.380249023  
H -2.133916378 4.418554306 6.050538063  
H -2.460939884 2.835259914 5.329535007  
H -2.206782103 5.410120964 3.594988346  
H -2.471836567 3.781871796 2.953020811  
H -1.099275470 4.764210701 2.385793686  
C 4.189334393 4.996854305 4.784521103  
H 4.233947277 4.082103252 4.189530849  
C 4.854575157 4.698651791 6.140402794  
C 4.970541000 6.081652641 4.020074368  
H 4.447782993 6.370543480 3.104960203  
H 5.100523949 6.987650394 4.621960163  
H 5.968960762 5.713342190 3.757586241  
H 4.777984142 5.562132835 6.810819626  
H 5.917647839 4.470180988 6.003632069  
H 4.386553288 3.842930794 6.633738995  
C 0.697984278 8.335276604 6.271389961  
H 1.637784481 8.893380165 6.373546600  
C 0.114538372 8.130208015 7.683885098  
C -0.248250768 9.175398827 5.396444321  
H 0.157425389 9.291869164 4.389008999  
H -1.233500361 8.703407288 5.308154106  
H -0.396423727 10.165369034 5.842730045  
H -0.827939689 7.572038651 7.636330605  
H -0.090220742 9.094160080 8.163237572  
H 0.804244220 7.568197250 8.322953224  
C 2.327613592 5.886521339 0.285866469

C 3.650226355 6.276423931 0.046893824  
C 1.393009305 5.973310471 -0.749158859  
C 4.050260067 6.669240475 -1.234414697  
C 1.799258709 6.359960556 -2.031455040  
C 3.131244659 6.692166805 -2.285325289  
H 4.378829479 6.285655499 0.850098312  
H 0.347704142 5.755482674 -0.564996898  
H 5.084413528 6.960045815 -1.404507518  
H 1.063691139 6.409207821 -2.831179142  
H 3.443379641 6.989585876 -3.282588720  
Cl 1.353314638 7.634774208 2.421252966  
O 2.912425280 -1.093327880 5.024232388  
C 1.757297873 -1.925046206 5.158087254  
H 1.170192719 -1.665545821 6.048303127  
H 1.103620887 -1.849000454 4.278064251  
H 2.119775772 -2.951416254 5.251476288  
C 2.906997204 -0.155165896 2.464844704  
H 3.988798141 -0.254953414 2.315483093  
H 2.539686441 -1.154609561 2.697394848  
H 2.461890459 0.144243643 1.519986033  
C 2.464898348 0.378474832 7.405583858  
H 1.488544583 0.339031786 7.904204369  
H 2.867844343 -0.632018745 7.342619896  
H 3.124016285 0.961829185 8.057937622  
C 1.718732595 3.148584366 7.159124374  
H 0.875221491 2.686402321 7.686020374  
H 2.562800646 3.136558056 7.858085155  
H 1.463419914 4.188678265 6.973238945

=====  
L3\_20  
=====

C 1.354840517 4.315810204 4.570694923  
C 2.319353580 5.277399540 5.003062248  
C 1.876858354 6.485434055 5.541685581  
C 0.522615016 6.807678699 5.640954971  
C -0.410182536 5.889729500 5.150764942  
C -0.028510708 4.655534267 4.629251480  
C 1.774439812 2.858785868 4.565871239  
C 2.329575539 2.186262131 3.443447828  
C 2.757650614 0.838012993 3.588565111  
C 2.687844753 0.244247913 4.859673500  
C 2.204645395 0.917809784 5.986115456  
C 1.732905030 2.231867552 5.836156368  
H 2.610675335 7.210076809 5.882568836  
H -1.466408849 6.139251709 5.185121536  
P 2.110218287 2.998233080 1.779883862  
C 0.902942955 1.889537930 0.822436035  
C 0.145430624 2.700099707 -0.247463062  
C -0.726285517 1.785263062 -1.123465180  
C -1.702409625 0.955249250 -0.277497768  
C -0.951925874 0.163852334 0.804017186  
C -0.095159590 1.091605067 1.682930827  
H 1.543880343 1.166673303 0.299048573  
H 0.839437485 3.265906572 -0.871802509  
H -0.488693088 3.438172579 0.258892983  
H -1.271066785 2.391074896 -1.857514501  
H -0.075679041 1.108638644 -1.697039127

|    |              |              |              |       |              |              |              |
|----|--------------|--------------|--------------|-------|--------------|--------------|--------------|
| H  | -2.421939611 | 1.630653143  | 0.207653180  | C     | 1.489904165  | 6.270707130  | -2.033013582 |
| H  | -1.657598734 | -0.391352981 | 1.434237361  | C     | 2.775153875  | 6.746039867  | -2.297786713 |
| H  | -0.302393705 | -0.584020495 | 0.325434387  | H     | 4.071144581  | 6.528176785  | 0.838656247  |
| H  | 0.421061754  | 0.511784494  | 2.453536510  | H     | 0.123910606  | 5.519345760  | -0.551762938 |
| H  | -0.757831156 | 1.790284276  | 2.202397346  | H     | 4.689133644  | 7.245169640  | -1.432018518 |
| H  | -2.284761190 | 0.278410941  | -0.914216220 | H     | 0.750003576  | 6.227118492  | -2.829124212 |
| C  | 3.738425493  | 2.726372242  | 0.867633402  | H     | 3.047769308  | 7.064161777  | -3.300304413 |
| C  | 4.858904362  | 3.539760351  | 1.545709372  | Cl    | 1.121980786  | 7.570783615  | 2.473829985  |
| C  | 6.205520153  | 3.364230156  | 0.825091004  | O     | 3.122841358  | -1.065875053 | 5.007120609  |
| C  | 6.085025311  | 3.687176466  | -0.671204686 | C     | 2.069052935  | -2.031388283 | 4.973056316  |
| C  | 5.014678001  | 2.804164410  | -1.328224301 | H     | 1.342743993  | -1.868323684 | 5.779510498  |
| C  | 3.643543005  | 2.986552954  | -0.653076887 | H     | 1.534280062  | -2.006745100 | 4.013363838  |
| H  | 3.991968870  | 1.672690511  | 0.983200252  | H     | 2.537403822  | -3.010048628 | 5.101392746  |
| H  | 4.954698086  | 3.226940155  | 2.592299223  | C     | 3.287702322  | -0.035469230 | 2.468416214  |
| H  | 4.587540627  | 4.598081589  | 1.558099866  | H     | 4.349798203  | 0.161706388  | 2.286112309  |
| H  | 6.960633755  | 4.001909733  | 1.300881028  | H     | 3.217090607  | -1.087877512 | 2.736323118  |
| H  | 6.551121235  | 2.326319695  | 0.943877041  | H     | 2.751513243  | 0.105977006  | 1.531207681  |
| H  | 5.802948952  | 4.741320610  | -0.795305312 | C     | 2.221543789  | 0.246599033  | 7.338062763  |
| H  | 4.924939156  | 3.038058758  | -2.395767927 | H     | 1.206677675  | 0.050114792  | 7.705831051  |
| H  | 5.323544979  | 1.750037909  | -1.259292364 | H     | 2.768402815  | -0.695455730 | 7.302025795  |
| H  | 2.925547123  | 2.294317007  | -1.107742190 | H     | 2.704307079  | 0.888043582  | 8.082571983  |
| H  | 3.282776117  | 3.997016430  | -0.848090529 | C     | 1.205664396  | 2.926582813  | 7.077572346  |
| H  | 7.052273273  | 3.551494837  | -1.170263410 | H     | 0.405379415  | 2.336315155  | 7.539351940  |
| Pd | 1.636350632  | 5.272467613  | 2.146538734  | H     | 1.992762089  | 3.026870728  | 7.834153175  |
| C  | -1.097795248 | 3.671239138  | 4.178060532  | H     | 0.814588606  | 3.921368599  | 6.881454468  |
| H  | -0.582395375 | 2.764673948  | 3.852269888  | ===== |              |              |              |
| C  | -1.890735507 | 4.229017735  | 2.981443167  | L3_30 |              |              |              |
| C  | -2.042745829 | 3.265381575  | 5.323612690  | ===== |              |              |              |
| H  | -1.491142750 | 2.825116873  | 6.159200668  | C     | 1.008105874  | 4.118571758  | 4.503859520  |
| H  | -2.598830700 | 4.127785683  | 5.706507206  | C     | 1.853421092  | 5.133252621  | 5.048964977  |
| H  | -2.773322582 | 2.527769566  | 4.972169399  | C     | 1.272459745  | 6.297096252  | 5.554597378  |
| H  | -2.466552258 | 5.115283489  | 3.268069029  | C     | -0.101606265 | 6.529110909  | 5.504266739  |
| H  | -2.594100237 | 3.479810715  | 2.598520756  | C     | -0.912991107 | 5.555503368  | 4.913142681  |
| H  | -1.217985630 | 4.527056694  | 2.171682358  | C     | -0.393489808 | 4.358838558  | 4.424757481  |
| C  | 3.816814661  | 4.989983559  | 4.939817905  | C     | 1.569097877  | 2.708641529  | 4.500704765  |
| H  | 3.953895330  | 4.088674068  | 4.338427544  | C     | 2.341775656  | 2.180441141  | 3.432226419  |
| C  | 4.396121502  | 4.703026295  | 6.337277889  | C     | 3.043032885  | 0.961796165  | 3.622126341  |
| C  | 4.590470791  | 6.125615120  | 4.244487286  | C     | 3.048991680  | 0.389376700  | 4.907347679  |
| H  | 4.132456779  | 6.382193565  | 3.285471201  | C     | 2.277768850  | 0.885337889  | 5.961957932  |
| H  | 4.609181404  | 7.036762714  | 4.852088451  | C     | 1.521159291  | 2.051333666  | 5.753360271  |
| H  | 5.629097939  | 5.821516037  | 4.070874214  | H     | 1.914184213  | 7.064897060  | 5.976449013  |
| H  | 4.238320827  | 5.555109978  | 7.008068562  | H     | -1.981948137 | 5.730749607  | 4.838169098  |
| H  | 5.474247456  | 4.516473770  | 6.275825024  | P     | 2.076987505  | 2.966858864  | 1.760060668  |
| H  | 3.926656723  | 3.824230671  | 6.788087845  | C     | 1.072310805  | 1.713047624  | 0.753785193  |
| C  | 0.077304229  | 8.112912178  | 6.279228210  | C     | 0.228916913  | 2.413712025  | -0.329529077 |
| H  | 0.983136058  | 8.691725731  | 6.501994133  | C     | -0.447444826 | 1.384133101  | -1.249468207 |
| C  | -0.648364425 | 7.842031479  | 7.612149715  | C     | -1.295001507 | 0.384553283  | -0.449253023 |
| C  | -0.795891762 | 8.958438873  | 5.335095406  | C     | -0.459217608 | -0.296592295 | 0.644482493  |
| H  | -0.284133136 | 9.134036064  | 4.386376858  | C     | 0.200129852  | 0.740305603  | 1.569615602  |
| H  | -1.743628979 | 8.454246521  | 5.113715172  | H     | 1.837766409  | 1.113894582  | 0.240374327  |
| H  | -1.034632206 | 9.921378136  | 5.800989151  | H     | 0.842399895  | 3.098834753  | -0.918765068 |
| H  | -1.566976547 | 7.267348289  | 7.445622444  | H     | -0.537233174 | 3.025065422  | 0.161620185  |
| H  | -0.926822722 | 8.782996178  | 8.099916458  | H     | -1.064264059 | 1.903940916  | -1.992342830 |
| H  | -0.017193999 | 7.271424294  | 8.302000046  | H     | 0.325963110  | 0.839083254  | -1.810521007 |
| C  | 2.080150843  | 5.886408806  | 0.285441041  | H     | -2.132394791 | 0.919889331  | 0.021743676  |
| C  | 3.348600626  | 6.422606468  | 0.036465563  | H     | -1.082184672 | -0.977009594 | 1.237762213  |
| C  | 1.135967970  | 5.855807781  | -0.743711889 | H     | 0.322154284  | -0.913694978 | 0.176916406  |
| C  | 3.695866108  | 6.840214252  | -1.251916766 |       |              |              |              |

H 0.787218094 0.238708436 2.344401836  
H -0.586904168 1.302465916 2.081984997  
H -1.736780524 -0.365176857 -1.116506815  
C 3.753597975 2.887817860 0.896475911  
C 4.776811600 3.759537697 1.651417851  
C 6.162769318 3.707191467 0.987824261  
C 6.081689835 4.077313900 -0.500665545  
C 5.102573872 3.150669575 -1.236364007  
C 3.695906162 3.208884954 -0.614122510  
H 4.091100216 1.854724526 0.964231193  
H 4.846461296 3.426266193 2.694300652  
H 4.425223827 4.795480728 1.677892327  
H 6.850013733 4.378075600 1.517814159  
H 6.576768875 2.692079067 1.085201979  
H 5.732467175 5.114156723 -0.598497212  
H 5.039642334 3.423124313 -2.296677351  
H 5.482557297 2.118449926 -1.196353078  
H 3.047348738 2.489247561 -1.126784205  
H 3.273160458 4.197760105 -0.784623086  
H 7.075736523 4.027714729 -0.961639225  
Pd 1.475776553 5.218149185 2.145110130  
C -1.335390210 3.313836575 3.846395254  
H -0.724402606 2.448016167 3.579542875  
C -2.017599106 3.836009741 2.568172932  
C -2.380795002 2.829284668 4.866812706  
H -1.906210542 2.419115782 5.762626171  
H -3.038825512 3.646594286 5.181096554  
H -3.009635210 2.047205448 4.426274300  
H -2.706360817 4.656347752 2.797986507  
H -2.592965126 3.039216518 2.081319094  
H -1.278221965 4.220953941 1.860015273  
C 3.366747618 4.950366020 5.152174950  
H 3.637010574 4.069171906 4.565712929  
C 3.799333572 4.687252045 6.606904030  
C 4.134964943 6.144299030 4.554321289  
H 3.791539907 6.363845348 3.539344788  
H 4.002317429 7.055152893 5.148145199  
H 5.208234310 5.920996666 4.523915291  
H 3.511080742 5.521242619 7.256972790  
H 4.887414932 4.569680214 6.670094490  
H 3.336466789 3.776776075 6.999490738  
C -0.697187424 7.796170712 6.093191147  
H 0.139915228 8.450134277 6.369387150  
C -1.489292145 7.472519398 7.375653744  
C -1.565519571 8.559861183 5.078922749  
H -1.003537893 8.759569168 4.163366318  
H -2.459571838 7.986226082 4.808019638  
H -1.902189493 9.510128975 5.509102821  
H -2.338283300 6.815941334 7.151861668  
H -1.884108424 8.388186455 7.830016136  
H -0.860659122 6.965320110 8.115471840  
C 1.861091614 5.888281345 0.301381022  
C 3.059916258 6.567914009 0.059232119  
C 0.928158998 5.740120888 -0.726618230  
C 3.356031895 7.023661137 -1.227889061  
C 1.231929541 6.196351051 -2.014477015  
C 2.451515198 6.822486877 -2.273022890  
H 3.758334398 6.758261681 0.867313445

H -0.034271229 5.279626846 -0.534863412  
H 4.293930531 7.543619633 -1.409246564  
H 0.506507277 6.063431263 -2.813951969  
H 2.685703516 7.172353745 -3.274859428  
Cl 0.928435922 7.500261307 2.542951822  
O 3.790521383 -0.762316883 5.125675201  
C 5.156108379 -0.508444130 5.459934711  
H 5.671491623 0.040800117 4.660891533  
H 5.235053062 0.068528593 6.391091347  
H 5.632470131 -1.482289195 5.594707966  
C 3.746729374 0.161077499 2.544027328  
H 4.757358074 0.532061875 2.339942217  
H 3.844212294 -0.874497473 2.872233629  
H 3.192959785 0.159524679 1.605003953  
C 2.278818130 0.183948100 7.298277378  
H 1.258811235 -0.050424233 7.621954441  
H 2.843038321 -0.747143865 7.247802734  
H 2.719203472 0.817119122 8.078759193  
C 0.718826532 2.582821608 6.925578117  
H -0.044108581 1.855717421 7.229689121  
H 1.360304236 2.742521524 7.799965382  
H 0.216600195 3.523212910 6.711035252

=====  
L3\_40  
=====

C 0.741856813 3.889164209 4.470846176  
C 1.492878079 4.896527290 5.153189659  
C 0.820540130 6.010735035 5.663359165  
C -0.549150765 6.198691845 5.498987675  
C -1.262554407 5.235031128 4.777876377  
C -0.652860701 4.091416359 4.267129421  
C 1.386428833 2.515598297 4.415255070  
C 2.345503569 2.161014557 3.424477339  
C 3.171491385 1.028786778 3.643779516  
C 3.101909399 0.382140011 4.893950462  
C 2.138476610 0.693785548 5.855903625  
C 1.264583945 1.767478108 5.608349800  
H 1.390383601 6.774001598 6.184728622  
H -2.326595545 5.377735615 4.612545967  
P 2.049437046 2.922806740 1.744920969  
C 1.202638865 1.562036514 0.727001190  
C 0.286929607 2.163820505 -0.358300298  
C -0.251158059 1.067470670 -1.293179154  
C -0.974264443 -0.037322707 -0.508425713  
C -0.061898615 -0.624673724 0.579764485  
C 0.460465550 0.471756876 1.524451852  
H 2.042425632 1.068383694 0.216569752  
H 0.818069458 2.923563242 -0.937465131  
H -0.552714527 2.672498226 0.129325032  
H -0.921996117 1.514710546 -2.036974430  
H 0.587707877 0.626910388 -1.852467179  
H -1.871606469 0.386587769 -0.033542056  
H -0.595333755 -1.386844516 1.161092639  
H 0.791610658 -1.131988287 0.105567336  
H 1.107934833 0.035838291 2.291148901  
H -0.392181218 0.915825248 2.049463272  
H -1.319784641 -0.826780677 -1.186558008

C 3.732055426 3.006717682 0.890030921  
C 4.671843529 3.958286762 1.655418515  
C 6.063525200 4.017804623 1.005452991  
C 5.963902473 4.383438110 -0.483125210  
C 5.071778297 3.380562067 -1.229214430  
C 3.658395052 3.322605371 -0.621135294  
H 4.158800602 2.007622719 0.950828254  
H 4.754534245 3.634697199 2.700937748  
H 4.237704277 4.962402344 1.676213026  
H 6.689938545 4.740728378 1.542056322  
H 6.556990623 3.038869619 1.104374766  
H 5.530869007 5.387975216 -0.581804514  
H 4.997066021 3.648374319 -2.289962530  
H 5.535154343 2.383095264 -1.185955763  
H 3.078815222 2.549494982 -1.138873577  
H 3.155244112 4.271250725 -0.799020827  
H 6.962261200 4.417444229 -0.936018109  
Pd 1.342126727 5.154648304 2.178684711  
C -1.493571281 3.066707134 3.519971371  
H -0.815025210 2.267208815 3.210828543  
C -2.119285107 3.680125237 2.252241611  
C -2.577859163 2.424777746 4.406018257  
H -2.148736477 1.948681831 5.293108463  
H -3.304000139 3.173064947 4.745827198  
H -3.126073360 1.660861015 3.841887236  
H -2.884491444 4.421978951 2.508789778  
H -2.597953558 2.903079510 1.643834949  
H -1.361791134 4.186897755 1.646751761  
C 2.997885466 4.772235394 5.401356220  
H 3.375829458 3.940187931 4.803944111  
C 3.291183710 4.450203419 6.880023479  
C 3.760464430 6.031061649 4.946752071  
H 3.545102835 6.263231754 3.900471449  
H 3.492111206 6.913163185 5.536957264  
H 4.839410782 5.872034550 5.058418274  
H 2.834745169 5.194319725 7.541948795  
H 4.370335579 4.438031673 7.069629192  
H 2.887610674 3.470483780 7.154156685  
C -1.246580362 7.413938522 6.087213516  
H -0.470307142 8.054674149 6.525717258  
C -2.206746340 6.994968414 7.217740059  
C -1.978389978 8.237817764 5.012710094  
H -1.288416505 8.537188530 4.220355988  
H -2.789299965 7.661080360 4.553151608  
H -2.422658682 9.134717941 5.459673882  
H -3.009653330 6.355772018 6.831583500  
H -2.672380447 7.874450684 7.676980495  
H -1.681887865 6.436666965 8.000601768  
C 1.628991961 5.833378792 0.320532203  
C 2.744650126 6.623769760 0.021020051  
C 0.695920169 5.544082165 -0.678142190  
C 2.964450598 7.050268173 -1.291767240  
C 0.922896028 5.974972248 -1.991607308  
C 2.065327168 6.711760044 -2.306513071  
H 3.435171127 6.917974949 0.803602338  
H -0.202012643 4.980859756 -0.448449314  
H 3.839941502 7.654572010 -1.517928243  
H 0.200537488 5.729578972 -2.766827583

H 2.242209673 7.039235115 -3.327410698  
Cl 0.896061480 7.435910702 2.679314375  
O 3.970693111 -0.664334536 5.164240837  
C 5.240208626 -0.235447392 5.660610199  
H 5.759584904 0.406974554 4.937228680  
H 5.130156517 0.314528912 6.605006695  
H 5.831659317 -1.137854338 5.832014561  
C 4.091713905 0.389699340 2.623355627  
H 5.014961720 0.960239828 2.474884272  
H 4.373251915 -0.606591165 2.965488434  
H 3.602427959 0.275808573 1.654346347  
C 2.067789793 -0.089501813 7.143863201  
H 1.069937468 -0.519220710 7.288244724  
H 2.792268753 -0.903489828 7.144986629  
H 2.261758327 0.553563893 8.011179924  
C 0.276840985 2.130848646 6.698212147  
H -0.388087898 1.285444140 6.912135124  
H 0.795383453 2.364443541 7.635624886  
H -0.339792699 2.989884853 6.444656372

=====  
L3\_50  
=====

C 0.501796126 3.624166489 4.400030136  
C 1.114756227 4.625606060 5.214738846  
C 0.328332126 5.672542095 5.706128120  
C -1.026783109 5.789484024 5.417275906  
C -1.603489876 4.829431057 4.578570843  
C -0.874881446 3.760997057 4.061034203  
C 1.269374371 2.310952663 4.311058044  
C 2.376753569 2.173877001 3.417159796  
C 3.357959986 1.187895417 3.690968513  
C 3.251852751 0.452037841 4.889302731  
C 2.140328884 0.530261695 5.731204033  
C 1.138410926 1.473557830 5.438452244  
H 0.796757102 6.436488628 6.319105625  
H -2.652730942 4.923998833 4.314374447  
P 2.046504259 2.892976046 1.727177143  
C 1.354728103 1.423282146 0.737815559  
C 0.333155096 1.892949343 -0.316232681  
C -0.079135336 0.735546231 -1.240605354  
C -0.617950499 -0.457911789 -0.437949479  
C 0.402737528 -0.917528629 0.614468575  
C 0.806259990 0.234303653 1.552485943  
H 2.240770578 1.050121903 0.204087824  
H 0.737175882 2.720511436 -0.905413628  
H -0.551999509 2.282214165 0.200239092  
H -0.828140557 1.086763024 -1.960639477  
H 0.793770790 0.414687604 -1.827863574  
H -1.547707796 -0.160390288 0.068959944  
H -0.001493758 -1.747065544 1.207192540  
H 1.299428582 -1.302473783 0.106938384  
H 1.546835184 -0.113370307 2.278263569  
H -0.070397556 0.543798506 2.130809784  
H -0.876208365 -1.286494493 -1.108265758  
C 3.700280905 3.145497322 0.851022422  
C 4.550602436 4.191958904 1.597424507  
C 5.920401573 4.382892609 0.926632345

C 5.759763241 4.737114906 -0.559502363  
 C 4.951438427 3.656176329 -1.292461276  
 C 3.562859774 3.459992409 -0.656518102  
 H 4.226080894 2.193316460 0.895527840  
 H 4.673692703 3.895539522 2.647032738  
 H 4.018455029 5.148349762 1.611741543  
 H 6.482831478 5.163927555 1.452532291  
 H 6.507602692 3.456222773 1.017016292  
 H 5.232587337 5.696809292 -0.647594452  
 H 4.830106735 3.919122696 -2.350112200  
 H 5.508556843 2.707333803 -1.263928294  
 H 3.047597170 2.638739347 -1.168197155  
 H 2.968754768 4.358152866 -0.815576494  
 H 6.741875172 4.864879131 -1.030827880  
 Pd 1.213680625 5.075318813 2.204641342  
 C -1.564894199 2.774934053 3.128395319  
 H -0.785514474 2.131291628 2.716627598  
 C -2.244922400 3.496464968 1.950113773  
 C -2.572716236 1.869383574 3.859572411  
 H -2.089895725 1.267843127 4.634057045  
 H -3.357394457 2.466312885 4.337870121  
 H -3.056094170 1.185298085 3.152385473  
 H -3.100238562 4.092718124 2.285215139  
 H -2.618108273 2.770407915 1.218400717  
 H -1.546981931 4.175234795 1.452823043  
 C 2.585889816 4.574640274 5.633043766  
 H 3.081461906 3.792736053 5.055818558  
 C 2.723447800 4.402851295 7.122127533  
 C 3.324269056 5.889595032 5.318882942  
 H 3.202531815 6.170041561 4.269379616  
 H 2.952708483 6.725675106 5.920360088  
 H 4.392784119 5.774784565 5.536322594  
 H 2.223084211 4.940620899 7.759365559  
 H 3.779576302 4.166656017 7.413698196  
 H 2.281585455 3.223373890 7.328553677  
 C -1.847499728 6.942489624 5.969405174  
 H -1.168278456 7.571582317 6.559418678  
 C -2.956539154 6.434882164 6.910202026  
 C -2.427253008 7.813166618 4.839312553  
 H -1.635002255 8.150085449 4.166130543  
 H -3.156709671 7.250934124 4.244657516  
 H -2.941618204 8.686676025 5.256371975  
 H -3.670358419 5.802452087 6.369709015  
 H -3.515245676 7.274542809 7.338663101  
 H -2.541570425 5.843327522 7.733348370  
 C 1.376642823 5.800368786 0.355150431  
 C 2.384533882 6.716705322 0.034189817  
 C 0.450275213 5.414498329 -0.617483318  
 C 2.503576517 7.187060833 -1.276194692  
 C 0.574135363 5.894504070 -1.927041888  
 C 1.608104706 6.768353939 -2.263282299  
 H 3.062610149 7.075915813 0.799957693  
 H -0.361840516 4.739267826 -0.373313576  
 H 3.294204473 7.892626286 -1.520717382  
 H -0.142157838 5.578633308 -2.682078123  
 H 1.705914140 7.134269714 -3.281829596  
 Cl 0.797538817 7.315871239 2.874963522  
 O 4.257517338 -0.442375869 5.224722862

C 5.324272156 0.161440238 5.960891247  
 H 5.817949772 0.949923396 5.377061844  
 H 4.960345268 0.595297813 6.901806831  
 H 6.043261051 -0.631453931 6.179734707  
 C 4.500926018 0.798314393 2.776549339  
 H 5.228066444 1.604877949 2.644893646  
 H 5.026073456 -0.060537592 3.192901373  
 H 4.135143280 0.501522422 1.790395617  
 C 2.046814203 -0.350106895 6.953225613  
 H 1.112240672 -0.922266781 6.952992439  
 H 2.876516104 -1.055711746 6.988434315  
 H 2.054479361 0.243991926 7.875396252  
 C -0.000324419 1.615811110 6.426175594  
 H -0.575705707 0.684162080 6.490429878  
 H 0.377831697 1.817798257 7.434960842  
 H -0.684106886 2.420031309 6.166481972

=====  
 L3\_60  
 =====

C 0.227850646 3.266933680 4.247510433  
 C 0.650318503 4.377293587 5.041666985  
 C -0.277884901 5.383595943 5.344388485  
 C -1.594170809 5.344677448 4.903788567  
 C -1.996851325 4.237669468 4.148149967  
 C -1.126785517 3.199125528 3.821823120  
 C 1.203595281 2.102862835 4.199165344  
 C 2.399970770 2.195968390 3.416863680  
 C 3.532844782 1.437385082 3.812147379  
 C 3.423380136 0.631378293 4.967630386  
 C 2.221904039 0.430439711 5.648099422  
 C 1.105805159 1.200647354 5.277462482  
 H 0.050804693 6.237762928 5.927654743  
 H -3.024659157 4.187116146 3.799530506  
 P 2.047328234 2.857676506 1.705969214  
 C 1.291012287 1.346257448 0.873732209  
 C 2.257709503 0.145296410 0.802026987  
 C 1.534316778 -1.106912136 0.273230940  
 C 0.867801905 -0.846353889 -1.085454226  
 C -0.085094385 0.355626494 -1.005948424  
 C 0.641695082 1.614446759 -0.501472175  
 H 0.486679405 1.078987122 1.566729188  
 H 2.675832748 -0.064407684 1.791445374  
 H 3.095772743 0.387243181 0.134271637  
 H 2.243866205 -1.940284491 0.202607557  
 H 0.767588079 -1.408059716 1.001713991  
 H 1.645045757 -0.640689909 -1.835884333  
 H -0.533593833 0.558151245 -1.985967040  
 H -0.913738251 0.116931885 -0.323806792  
 H -0.051714920 2.452917337 -0.443836629  
 H 1.402488828 1.897278190 -1.234121323  
 H 0.331226140 -1.740410686 -1.424964905  
 C 3.696324825 3.180491209 0.855440497  
 C 4.396087170 4.365457535 1.559108496  
 C 5.782000542 4.641965866 0.957784593  
 C 5.671160698 4.903721333 -0.551662266  
 C 4.995154381 3.720168352 -1.257431626  
 C 3.604967594 3.409187078 -0.670641363

H 4.307939529 2.289194584 0.984547615  
H 4.466573715 4.186572552 2.638303518  
H 3.776200533 5.257775307 1.449030757  
H 6.239669323 5.498803616 1.466823101  
H 6.443553925 3.779724360 1.131945252  
H 5.071674824 5.809161186 -0.717006207  
H 4.895371437 3.919561625 -2.331134558  
H 5.636193752 2.830773592 -1.160318136  
H 3.219581842 2.509780169 -1.158401370  
H 2.916515350 4.224103451 -0.901945174  
H 6.661738396 5.090276241 -0.984008074  
Pd 1.078781128 4.987586498 2.180466413  
C -1.663000584 2.022485495 3.015496731  
H -0.853777945 1.290375590 2.920099258  
C -2.068848133 2.490490198 1.605370641  
C -2.846339226 1.307346463 3.695519447  
H -2.580233335 0.920996189 4.682537079  
H -3.700118303 1.981953621 3.819289923  
H -3.179480791 0.463106364 3.080932379  
H -2.951912403 3.137194633 1.650603652  
H -2.309017658 1.639448404 0.958201706  
H -1.264345884 3.069089174 1.147867560  
C 2.027071476 4.455976486 5.711346626  
H 2.642827272 3.635747433 5.344429493  
C 1.883987069 4.260645390 7.234546661  
C 2.782657146 5.755407810 5.384783268  
H 2.941066504 5.859534740 4.307208538  
H 2.236391544 6.646181107 5.710657597  
H 3.758930206 5.753284931 5.884678364  
H 1.303672075 5.072037697 7.687874794  
H 2.870448351 4.245505333 7.712989807  
H 1.379221439 3.316725492 7.466269970  
C -2.560745955 6.474367619 5.217132568  
H -2.002938271 7.230163097 5.784684658  
C -3.727958679 5.988238811 6.096715927  
C -3.070457935 7.143794060 3.926955700  
H -2.231151581 7.475983620 3.310189009  
H -3.674573183 6.445718288 3.335165739  
H -3.702001333 8.006915092 4.167568684  
H -4.328711033 5.235077381 5.573407173  
H -4.392238140 6.821317673 6.353509903  
H -3.365968943 5.538801193 7.027933598  
C 1.188261867 5.661137581 0.307140350  
C 2.143597126 6.614100456 -0.064252220  
C 0.257019460 5.210090160 -0.632292330  
C 2.209314346 7.054862499 -1.388761282  
C 0.325773716 5.659922123 -1.956785202  
C 1.311157703 6.569062233 -2.342656374  
H 2.816923857 7.033187866 0.675451458  
H -0.529222369 4.520602226 -0.345153153  
H 2.959064722 7.791549683 -1.668998480  
H -0.396603227 5.294152260 -2.683627129  
H 1.366343021 6.912779331 -3.372446299  
Cl 0.546282828 7.226217270 2.802584171  
O 4.542298794 -0.053455077 5.419920444  
C 5.265661240 0.658482671 6.427484989  
H 5.644542694 1.615461826 6.043574810  
H 4.636816025 0.856105149 7.305593014

H 6.106614113 0.024336711 6.717594147  
C 4.873370647 1.380558848 3.105277061  
H 5.301125050 2.368225574 2.933347702  
H 5.578571796 0.805872917 3.702357769  
H 4.795363426 0.868132353 2.142754793  
C 2.152610064 -0.544038296 6.798618793  
H 1.279003978 -1.197687626 6.706177711  
H 3.046681166 -1.166818023 6.833067894  
H 2.057986736 -0.023714880 7.760419846  
C -0.138300657 1.088184357 6.133011818  
H -0.613434196 0.108171865 5.998241901  
H 0.107574321 1.171241283 7.197394848  
H -0.873767614 1.855856419 5.905267715

=====  
L3\_70  
=====

C -0.032151699 2.751883984 4.055756569  
C 0.119104974 3.954123020 4.810376644  
C -0.912815511 4.900060654 4.795172691  
C -2.103235722 4.688239574 4.104350567  
C -2.281263590 3.446634531 3.488835096  
C -1.284328938 2.464866877 3.460880995  
C 1.168406010 1.831550002 4.096357822  
C 2.391322374 2.204115629 3.433124542  
C 3.615924597 1.675961733 3.909335136  
C 3.578940630 0.768877327 4.991112709  
C 2.391232729 0.289407939 5.542438030  
C 1.179356098 0.873463511 5.129952908  
H -0.767967761 5.843787670 5.311267376  
H -3.229546070 3.239605665 3.000194550  
P 2.044325829 2.845876217 1.708914042  
C 1.483236790 1.285030842 0.827854216  
C 2.583217621 0.200601131 0.796017051  
C 2.034414530 -1.109951019 0.204884112  
C 1.431910515 -0.887477636 -1.190532565  
C 0.339712501 0.192249522 -1.151687264  
C 0.875390232 1.515070915 -0.575359106  
H 0.683965862 0.919174910 1.479806304  
H 2.971410990 0.022833280 1.804718375  
H 3.425136089 0.545156062 0.181136891  
H 2.832657576 -1.861235023 0.166497052  
H 1.259763360 -1.507506847 0.876636386  
H 2.228400946 -0.573956430 -1.881254792  
H -0.062931344 0.369459480 -2.156229258  
H -0.496160328 -0.164511889 -0.536473930  
H 0.090264596 2.274203300 -0.539611578  
H 1.631300330 1.904620647 -1.260434389  
H 1.026418328 -1.827254891 -1.584438801  
C 3.677159786 3.355646610 0.894813359  
C 4.159440041 4.694078922 1.502263904  
C 5.526500702 5.113453865 0.943856418  
C 5.460978031 5.240524292 -0.583827317  
C 4.971900940 3.930852890 -1.214635968  
C 3.616065264 3.470312119 -0.645148993  
H 4.410787582 2.579567671 1.110379338  
H 4.191368580 4.641763687 2.596034288  
H 3.422377586 5.472755432 1.270611763



H 5.834123611 6.062372208 1.398704052  
H 6.287003517 4.367123604 1.218698978  
H 4.767326832 6.052422523 -0.845731437  
H 4.889170170 4.034552097 -2.303436041  
H 5.719937325 3.144994020 -1.031033516  
H 3.379944324 2.500157595 -1.087124586  
H 2.824957371 4.165186405 -0.945872724  
H 6.440077305 5.517784595 -0.992896140  
Pd 1.022852540 4.944905281 2.203710556  
C -1.629564881 1.110217214 2.841385126  
H -0.730145454 0.482946098 2.874190569  
C -2.090300083 1.233751416 1.377732515  
C -2.735589027 0.385143876 3.639176369  
H -2.477123737 0.251154900 4.690503597  
H -3.672222614 0.951399386 3.597970963  
H -2.927024126 -0.604637802 3.208477259  
H -3.043453217 1.769225121 1.311955452  
H -2.244806528 0.242816716 0.937300801  
H -1.370712280 1.776140213 0.766962528  
C 1.310955882 4.202790737 5.746376038  
H 1.963513255 3.329495668 5.718395233  
C 0.820010304 4.335744858 7.202369213  
C 2.164207220 5.414550304 5.338344097  
H 2.629092693 5.257383823 4.355940342  
H 1.574808121 6.332022667 5.260517597  
H 2.971447229 5.573758602 6.063126087  
H 0.200118750 5.228260994 7.341231346  
H 1.673996687 4.414609432 7.884972572  
H 0.224805057 3.464242458 7.498576164  
C -3.149952173 5.784247398 4.000000000  
H -2.814880610 6.613741875 4.635651112  
C -4.529239655 5.329887867 4.506798744  
C -3.220073938 6.311611652 2.553495646  
H -2.238196850 6.663960934 2.225226164  
H -3.548969030 5.521654606 1.867270231  
H -3.934273243 7.139905930 2.479506493  
H -4.937331676 4.521557331 3.888766050  
H -5.242946148 6.160439491 4.472057343  
H -4.475679874 4.967512608 5.539101124  
C 0.324363351 5.172302246 0.361097068  
C 0.992045879 5.920955658 -0.610334218  
C -0.929786205 4.614768505 0.088658303  
C 0.417209357 6.071848392 -1.878587961  
C -1.496944785 4.778505802 -1.180427790  
C -0.821697593 5.496458054 -2.170863152  
H 1.938724637 6.401394844 -0.384688199  
H -1.466418266 4.069186211 0.856883228  
H 0.940567911 6.653484344 -2.634655237  
H -2.471840858 4.342275143 -1.389108539  
H -1.263238668 5.619230270 -3.156332493  
Cl 0.524604440 7.222859859 2.706445217  
O 4.775969982 0.271044254 5.485012531  
C 5.236565590 0.956998050 6.652924061  
H 5.426929951 2.018172264 6.441148758  
H 4.510280132 0.887742877 7.473194122  
H 6.168926716 0.473130316 6.953112602  
C 4.995171547 1.971693158 3.355804920  
H 5.136061668 3.023973227 3.121554852

H 5.757039547 1.679898739 4.076427460  
H 5.192779541 1.385108352 2.452121496  
C 2.426377058 -0.782754540 6.604447842  
H 1.649221420 -1.532945633 6.428980827  
H 3.395829439 -1.282386780 6.613630772  
H 2.247218847 -0.368590236 7.605355740  
C -0.066712931 0.516801834 5.911215782  
H -0.432638526 -0.482264757 5.642425537  
H 0.136733770 0.500885248 6.987098217  
H -0.870314598 1.229381561 5.738929272

=====  
L3\_80  
=====

C 0.161874369 0.627557576 3.152375698  
C -1.123652577 1.192629576 2.974378586  
C -2.132662296 0.405608147 2.406870365  
C -1.913440347 -0.912154078 2.010090590  
C -0.634799123 -1.448076606 2.192039013  
C 0.411756217 -0.712028563 2.754775524  
C 1.206764579 1.360690117 3.946766138  
C 2.355911016 2.092763901 3.460644245  
C 3.267854691 2.689922810 4.359517574  
C 3.091240406 2.451484203 5.733601093  
C 2.047799587 1.671451926 6.239304066  
C 1.095074773 1.141788125 5.348369122  
H -3.117772579 0.836326540 2.255627155  
H -0.449880272 -2.468314171 1.873209834  
P 2.042430639 2.806619167 1.752740502  
C 1.068739176 1.762440920 0.513723910  
C 1.798170924 0.591118276 -0.167683691  
C 0.803286791 -0.238409266 -0.999510944  
C 0.075634420 0.633585930 -2.033958912  
C -0.610504210 1.833005548 -1.361174226  
C 0.385138571 2.670740843 -0.538326442  
H 0.257854164 1.341773629 1.096438885  
H 2.288678169 -0.040756997 0.574668109  
H 2.581375360 0.968313158 -0.832947850  
H 1.332599878 -1.061788797 -1.495952845  
H 0.068238355 -0.692907453 -0.324007720  
H 0.801330447 1.002435923 -2.773499489  
H -1.095627069 2.469144106 -2.111394644  
H -1.403805494 1.468082309 -0.692269146  
H -0.137976795 3.491407871 -0.039165732  
H 1.120863795 3.128651857 -1.207026243  
H -0.659000456 0.033961277 -2.585489035  
C 3.721259117 3.065832615 0.937977612  
C 3.680996418 3.567765474 -0.523706079  
C 5.096352100 3.982031107 -0.965202212  
C 6.097810268 2.826627254 -0.815974295  
C 6.104205608 2.273909807 0.618659854  
C 4.688576221 1.865537763 1.065129399  
H 4.137367249 3.899290562 1.506057978  
H 3.002895355 4.416072845 -0.625381291  
H 3.322443962 2.777342319 -1.191899896  
H 5.067383766 4.334020138 -2.003393650  
H 5.419161320 4.837539196 -0.355935752  
H 5.819745064 2.018373251 -1.508447647

H 6.782347679 1.415322423 0.697554171  
H 6.492118359 3.044132710 1.301438570  
H 4.705522537 1.478176355 2.089737892  
H 4.343293190 1.041514158 0.432706028  
H 7.105202198 3.152029037 -1.102663398  
Pd 0.776525438 4.729417801 2.352397919  
C 1.791647553 -1.361847997 2.913836479  
H 2.540534973 -0.571298361 2.792893887  
C 2.080152035 -2.448627710 1.859884024  
C 1.997139812 -1.968674421 4.317949295  
H 2.048221111 -1.198194504 5.087156773  
H 1.179304004 -2.655421734 4.563700676  
H 2.934985876 -2.534569502 4.351152897  
H 1.517767668 -3.366076231 2.066621304  
H 3.142514467 -2.712756157 1.883683443  
H 1.831418633 -2.128740072 0.844850063  
C -1.435767055 2.647779942 3.318986893  
H -0.469920069 3.184946537 3.338353872  
C -2.038680077 2.837408543 4.720888615  
C -2.335874081 3.327749252 2.271173716  
H -1.987752795 3.133538008 1.252530575  
H -3.368791342 2.971028566 2.348941565  
H -2.337923288 4.408013344 2.436585903  
H -2.967623234 2.263688087 4.819379807  
H -2.262077570 3.896899223 4.879266739  
H -1.351005077 2.516249418 5.503714085  
C -3.020112514 -1.722212791 1.351637840  
H -3.930655003 -1.108832836 1.373324275  
C -3.316668272 -3.024485826 2.115930557  
C -2.687931538 -2.008988380 -0.125729293  
H -2.514074326 -1.080054760 -0.679132938  
H -1.783628941 -2.622159958 -0.212637842  
H -3.507566690 -2.549865961 -0.611888528  
H -2.451978683 -3.697532892 2.105488300  
H -4.157079220 -3.558261871 1.658669353  
H -3.568454504 -2.819887400 3.161334991  
C 1.742603421 5.911278725 1.095568776  
C 2.994649410 6.437915325 1.422079206  
C 1.132370710 6.239496708 -0.118658133  
C 3.659240246 7.260945797 0.506750703  
C 1.805670381 7.064780712 -1.025315642  
C 3.072495222 7.567204952 -0.721696794  
H 3.453774929 6.224668026 2.381181002  
H 0.145843178 5.861508846 -0.364202946  
H 4.636240482 7.664253235 0.762111306  
H 1.332893372 7.314064026 -1.972257376  
H 3.592803001 8.203189850 -1.432478428  
Cl -0.570678711 6.435735226 3.271794081  
O 3.981595039 3.023792744 6.627244949  
C 3.527423382 4.272828102 7.165463448  
H 3.371790171 5.014707565 6.371682167  
H 2.589359045 4.152377129 7.721326828  
H 4.309712410 4.621246815 7.843562603  
C 4.371471882 3.645325899 3.966849327  
H 5.091553211 3.194680691 3.283207655  
H 3.957334995 4.539731979 3.493042946  
H 4.925038338 3.954802513 4.851282120  
C 1.959359050 1.410716414 7.724758148

H 1.803339124 0.346884549 7.931280613  
H 2.874770164 1.723963141 8.227022171  
H 1.116017342 1.946996450 8.177967072  
C -0.018382987 0.311309189 5.965716362  
H 0.382979035 -0.609391749 6.405380249  
H -0.506217897 0.856356025 6.780279160  
H -0.785110712 0.022927657 5.251350403

=====  
L3\_90  
=====

C 0.172621474 0.603477418 3.094658852  
C -1.093505263 1.229758024 2.988727331  
C -2.148827076 0.517035902 2.408637285  
C -1.994302154 -0.784967303 1.934728265  
C -0.735533834 -1.383054972 2.052686691  
C 0.357011676 -0.721179008 2.621231794  
C 1.253406525 1.264526010 3.898011208  
C 2.355911016 2.092763901 3.460644245  
C 3.256254435 2.681201220 4.369659901  
C 3.108516693 2.364319086 5.728772640  
C 2.108470440 1.507161379 6.198807716  
C 1.171671629 0.973198295 5.292229176  
H -3.119480133 0.994196177 2.310503960  
H -0.603414714 -2.391511202 1.675104856  
P 2.042430639 2.806619167 1.752740622  
C 1.013122439 1.838007092 0.497371912  
C 1.689323187 0.656351328 -0.219191656  
C 0.664067447 -0.090968333 -1.089884639  
C -0.008856809 0.854359031 -2.095676661  
C -0.642156303 2.060299158 -1.385697722  
C 0.384574175 2.816540003 -0.524428010  
H 0.178983748 1.441564083 1.063277006  
H 2.139736414 -0.024478601 0.502833426  
H 2.497481585 1.015844345 -0.862567961  
H 1.158018947 -0.918999434 -1.614192724  
H -0.098288432 -0.535251260 -0.438653529  
H 0.741558731 1.213861346 -2.814880848  
H -1.087132812 2.746707678 -2.116122007  
H -1.459660411 1.711980462 -0.737530887  
H -0.103447743 3.639852762 0.003488785  
H 1.147653222 3.266523838 -1.166768789  
H -0.766108572 0.312977999 -2.676058531  
C 3.747126341 2.977678776 0.954949856  
C 3.778150320 3.467842817 -0.510647893  
C 5.224769115 3.803284168 -0.915052116  
C 6.158740997 2.598355055 -0.728486896  
C 6.099872589 2.067868710 0.712805808  
C 4.655736446 1.739164591 1.132750750  
H 4.184978008 3.797419310 1.526551962  
H 3.150161505 4.350463390 -0.638377249  
H 3.397175074 2.695284843 -1.186870813  
H 5.242679119 4.147159100 -1.956203699  
H 5.576094627 4.645766735 -0.303361535  
H 5.854320526 1.796966791 -1.417908072  
H 6.731147766 1.177475452 0.822340906  
H 6.509836197 2.828155279 1.393954039  
H 4.633963585 1.383760810 2.168897629

H 4.284993172 0.913650334 0.515439391  
H 7.188859463 2.865528584 -0.993887424  
Pd 0.953412533 4.831769466 2.362711191  
C 1.714374661 -1.431953073 2.704566717  
H 2.489474058 -0.664977670 2.591291189  
C 1.921641946 -2.482229233 1.595943570  
C 1.951082349 -2.110917330 4.070192814  
H 2.077704191 -1.379558325 4.867624283  
H 1.111283541 -2.766629457 4.326040268  
H 2.858840466 -2.723654985 4.033641815  
H 1.328236938 -3.383705616 1.785530686  
H 2.972154856 -2.789794207 1.570701122  
H 1.651875377 -2.110362291 0.604506552  
C -1.337443113 2.669964790 3.440184832  
H -0.356694639 3.170031309 3.486790180  
C -1.928162456 2.763648987 4.858524799  
C -2.216980934 3.461670637 2.455058813  
H -1.877936721 3.335120916 1.422656298  
H -3.263164997 3.141094685 2.508861065  
H -2.175503492 4.526762962 2.699018002  
H -2.874910116 2.214058638 4.916558266  
H -2.120345592 3.811801910 5.109501362  
H -1.247968674 2.355408907 5.607232571  
C -3.150952339 -1.511014342 1.263750672  
H -4.030557156 -0.857540965 1.334185123  
C -3.494181871 -2.832120180 1.974317670  
C -2.863659620 -1.743290663 -0.232604742  
H -2.656706810 -0.798752367 -0.746738732  
H -1.992623448 -2.394424200 -0.369097352  
H -3.718713284 -2.220803976 -0.724041462  
H -2.662406206 -3.543105125 1.914992929  
H -4.367224693 -3.304761887 1.511106253  
H -3.716498852 -2.664855957 3.032946825  
C 1.929203749 5.916860580 1.023740649  
C 3.216044664 6.391583443 1.292304277  
C 1.300788164 6.234110355 -0.184255674  
C 3.894412279 7.142937183 0.325876564  
C 1.989732742 6.984736443 -1.143391848  
C 3.290650845 7.430425644 -0.899178565  
H 3.696687698 6.191194057 2.243393898  
H 0.288964510 5.902129650 -0.388100088  
H 4.897578239 7.503802299 0.539671898  
H 1.500649929 7.220798969 -2.085400105  
H 3.822033882 8.008008957 -1.650173187  
Cl -0.251729041 6.615607738 3.316327572  
O 3.977791071 2.935348511 6.643032551  
C 3.468360186 4.135303497 7.240503311  
H 3.268519163 4.903184414 6.482126713  
H 2.543292522 3.943401575 7.798229218  
H 4.239153862 4.491487980 7.927509308  
C 4.319074631 3.684869766 3.992954731  
H 5.071921349 3.257651329 3.327708960  
H 3.869705439 4.549263954 3.497176409  
H 4.839934349 4.031205177 4.883446693  
C 2.044040442 1.176489472 7.671494484  
H 1.930001259 0.099755287 7.830035686  
H 2.951590538 1.502022505 8.180335999  
H 1.185482621 1.659264207 8.155493736

C 0.087621383 0.089098379 5.887813091  
H 0.514603436 -0.831734776 6.301062584  
H -0.416462690 0.595587194 6.717446327  
H -0.670388758 -0.199733227 5.164765358

=====  
L3\_100  
=====

C 0.333137959 0.332764208 2.928161860  
C -0.978498399 0.862679780 2.886370659  
C -1.991949320 0.105810978 2.288368464  
C -1.750305533 -1.150887489 1.734989882  
C -0.445092797 -1.652006984 1.785711050  
C 0.607485712 -0.941337526 2.369790316  
C 1.355271935 1.009482503 3.790820360  
C 2.328763008 2.031644344 3.473898649  
C 3.159022570 2.622322559 4.441186905  
C 3.060083866 2.140380383 5.755772591  
C 2.169448853 1.125322938 6.120041847  
C 1.300812960 0.580975831 5.151687145  
H -2.999680042 0.510109603 2.247650623  
H -0.245132610 -2.623083353 1.345477462  
P 2.033594847 2.790410995 1.780024171  
C 1.039448738 1.877728224 0.453240156  
C 1.745751500 0.745680869 -0.313781947  
C 0.751500368 0.035797078 -1.250262737  
C 0.093659259 1.026845574 -2.221844196  
C -0.566088736 2.187635899 -1.462278605  
C 0.431347013 2.903598070 -0.533587813  
H 0.197895944 1.443699002 0.980945289  
H 2.193145990 0.032852117 0.376327187  
H 2.561820984 1.152206779 -0.917150378  
H 1.269298792 -0.756518543 -1.805903912  
H -0.021427255 -0.452850431 -0.644753993  
H 0.857474625 1.429984212 -2.902650833  
H -0.997277439 2.911384106 -2.164428473  
H -1.397779822 1.798929572 -0.856463671  
H -0.077209614 3.697247267 0.019416532  
H 1.210721135 3.389327288 -1.129231095  
H -0.645191729 0.511309206 -2.847602606  
C 3.756764412 3.024461746 1.043138266  
C 3.818039894 3.560327053 -0.405572712  
C 5.266531944 3.947289944 -0.753958344  
C 6.227348804 2.762397051 -0.573194027  
C 6.139949799 2.186717272 0.848898292  
C 4.694285870 1.808100700 1.218778729  
H 4.152017117 3.838199854 1.654171824  
H 3.168346882 4.427873611 -0.526582956  
H 3.481818676 2.798550367 -1.115746379  
H 5.307370186 4.322113991 -1.783726931  
H 5.576014996 4.780199528 -0.107452564  
H 5.966547966 1.974715352 -1.295527339  
H 6.792205811 1.310698509 0.951167047  
H 6.508120060 2.936280012 1.565090060  
H 4.656490803 1.434031129 2.247865200  
H 4.360980034 0.985541046 0.574974239  
H 7.257276535 3.065066576 -0.798172832  
Pd 0.931004882 4.783020020 2.426651478

C 2.012561560 -1.558268547 2.404116154  
H 2.732228279 -0.731577396 2.368192911  
C 2.298191071 -2.491091967 1.210194945  
C 2.291740417 -2.339286089 3.705353737  
H 2.368962288 -1.675663590 4.565258026  
H 1.496268392 -3.068145275 3.896264791  
H 3.237592697 -2.885806322 3.620095015  
H 1.775235653 -3.447527170 1.320429802  
H 3.368861914 -2.715625525 1.164499521  
H 1.999558091 -2.059278250 0.252214134  
C -1.319517255 2.244786739 3.443513393  
H -0.377464771 2.775257826 3.630017281  
C -2.043105602 2.158465624 4.799433231  
C -2.145557165 3.092947006 2.457451820  
H -1.703725696 3.091389656 1.457060933  
H -3.171840429 2.719685316 2.372034550  
H -2.187574148 4.130011559 2.803416967  
H -2.978328943 1.595189929 4.701998711  
H -2.284620285 3.163627148 5.160548210  
H -1.425553203 1.663947344 5.552722454  
C -2.865467310 -1.930355549 1.054871559  
H -3.794836521 -1.363754392 1.199764371  
C -3.065911770 -3.321394205 1.681674957  
C -2.614291430 -2.036208153 -0.461878330  
H -2.510781527 -1.044520020 -0.915049732  
H -1.693925142 -2.594439983 -0.668704391  
H -3.440906286 -2.556067228 -0.959004879  
H -2.180742979 -3.952282906 1.543254018  
H -3.914269209 -3.835623264 1.216985464  
H -3.258168221 -3.246092558 2.756606579  
C 1.891020894 5.923432350 1.124556899  
C 3.173511744 6.401343346 1.406471729  
C 1.245244503 6.295776367 -0.058344293  
C 3.828487396 7.217715740 0.477474660  
C 1.910494566 7.112265110 -0.979336083  
C 3.205357790 7.567727089 -0.721407592  
H 3.675429821 6.144816399 2.333036184  
H 0.234775335 5.963422775 -0.268219143  
H 4.829249382 7.579866409 0.700496972  
H 1.406013727 7.394781590 -1.900215030  
H 3.718427420 8.197800636 -1.442361116  
Cl -0.380052477 6.464100838 3.423674583  
O 3.866699219 2.702023268 6.730729103  
C 3.234851360 3.771498919 7.446784496  
H 2.942252398 4.583920002 6.769704342  
H 2.343243837 3.422145128 7.982554913  
H 3.969285727 4.141032219 8.165781975  
C 4.104049683 3.765954256 4.163262844  
H 3.570768595 4.598828316 3.695242167  
H 4.553525925 4.119343281 5.089158535  
H 4.923406124 3.464649677 3.506060123  
C 2.138549089 0.642096102 7.551330090  
H 2.208863020 -0.449714005 7.601512432  
H 2.969985008 1.059372187 8.119367599  
H 1.202160716 0.920538783 8.050865173  
C 0.295623481 -0.442884058 5.654260635  
H 0.797298133 -1.308117509 6.100771427  
H -0.329116523 -0.009340864 6.443655968

H -0.365004033 -0.812715113 4.875169754

=====  
L3\_110  
=====

C 0.891913593 -0.027781529 2.282659769  
C -0.475403249 -0.099353917 1.915093064  
C -0.870183527 -1.091876268 1.009218693  
C 0.028666237 -1.990277171 0.432658970  
C 1.373976946 -1.883214474 0.787399590  
C 1.821736574 -0.928709686 1.704381824  
C 1.352932572 0.852304518 3.413025379  
C 2.138055563 2.066330910 3.235205412  
C 2.525790930 2.805730343 4.379376888  
C 2.250766754 2.277369738 5.652838230  
C 1.645449400 1.035796523 5.842239380  
C 1.201179147 0.319058597 4.713176727  
H -1.914612889 -1.158717155 0.722059727  
H 2.094567776 -2.566301584 0.345554978  
P 2.403721333 3.018516302 1.628625274  
C 1.824278235 2.084047318 0.076744631  
C 2.622874975 2.464877844 -1.195577025  
C 2.142876625 1.620742679 -2.391552925  
C 0.643954158 1.805216551 -2.658416510  
C -0.172084868 1.518402338 -1.392161489  
C 0.333637953 2.355437040 -0.208577514  
H 1.959614396 1.017327428 0.260390848  
H 3.698620319 2.309231758 -1.080612183  
H 2.476332426 3.531971455 -1.414143562  
H 2.728749514 1.882887602 -3.281039238  
H 2.346825600 0.560916662 -2.179131508  
H 0.461482853 2.840265036 -2.980725765  
H -1.233384371 1.733769774 -1.566968799  
H -0.103529103 0.454041511 -1.135330200  
H -0.270406127 2.174861670 0.676210582  
H 0.215093836 3.421134710 -0.442038089  
H 0.321346074 1.156857967 -3.482523918  
C 4.297323704 2.990194082 1.387710333  
C 5.202815056 2.488173485 2.531884432  
C 6.647790909 2.345564127 2.018525839  
C 7.176983833 3.678357840 1.465432167  
C 6.262827873 4.222651005 0.356820852  
C 4.803602219 4.338221550 0.831124425  
H 4.411978245 2.240951538 0.599579811  
H 4.842335701 1.529774904 2.915121078  
H 5.204239368 3.184686422 3.373595238  
H 7.290454865 1.984970093 2.830732822  
H 6.681177139 1.581400871 1.228101730  
H 7.226721764 4.410870552 2.283963919  
H 6.618302822 5.199244976 0.008071747  
H 6.301360130 3.545748711 -0.509211063  
H 4.171275139 4.678090096 0.002042189  
H 4.730464935 5.106863022 1.613052607  
H 8.199819565 3.557826519 1.089143038  
Pd 1.387899637 5.086239338 1.440479755  
C 3.304975271 -0.914075136 2.073436022  
H 3.492092371 -0.027187085 2.681164265  
C 4.224738598 -0.827766478 0.840560436

C 3.673288107 -2.140539408 2.928951502  
H 3.078001738 -2.177255154 3.845109701  
H 3.495402575 -3.069288969 2.375297070  
H 4.732003212 -2.112875700 3.211173773  
H 4.181104183 -1.739692688 0.235614255  
H 5.266035080 -0.694782794 1.155392051  
H 3.959480524 0.011589949 0.191172600  
C -1.529834628 0.873184681 2.458585262  
H -1.033371091 1.832178712 2.633938789  
C -2.125436306 0.432127327 3.811121464  
C -2.690037727 1.113554120 1.472523332  
H -2.338858604 1.348379374 0.464848667  
H -3.350304842 0.241223320 1.405642390  
H -3.289962769 1.955837369 1.822324634  
H -2.501621962 -0.596304178 3.758681774  
H -2.960960388 1.088758469 4.075591564  
H -1.393573046 0.494739354 4.615849972  
C -0.442708462 -3.025801420 -0.577401280  
H -1.531348825 -2.917846203 -0.672855079  
C -0.155085996 -4.460933208 -0.100429893  
C 0.174187154 -2.770034790 -1.965987086  
H -0.059731774 -1.761806846 -2.323624134  
H 1.265359044 -2.868636131 -1.935000420  
H -0.205411479 -3.490322113 -2.699552298  
H 0.922452748 -4.638392448 -0.008098348  
H -0.552364588 -5.193503857 -0.811920524  
H -0.609717906 -4.650587082 0.877175093  
C -0.329533756 4.584253788 2.314556837  
C -1.490844846 4.783662796 1.558693647  
C -0.414455056 4.212116718 3.655429602  
C -2.738589764 4.604078770 2.162486076  
C -1.671635985 4.032586098 4.246438503  
C -2.835497856 4.225578785 3.504190922  
H -1.431223750 5.111619949 0.527791798  
H 0.470807374 4.042708397 4.248924255  
H -3.639018536 4.768181324 1.575788617  
H -1.727923274 3.733960152 5.290462971  
H -3.809912205 4.089576244 3.965352297  
Cl 0.760460079 7.277099609 0.860302389  
O 2.627075911 3.019554377 6.761375904  
C 1.579256415 3.836342573 7.292308807  
H 1.211503029 4.556233406 6.550346375  
H 0.734568954 3.226080656 7.638568878  
H 2.004781961 4.379033566 8.139338493  
C 3.137306213 4.196072578 4.368137360  
H 2.368857622 4.954550743 4.558282375  
H 3.884056807 4.284881115 5.159769058  
H 3.594375610 4.476232052 3.425254822  
C 1.480424166 0.480244040 7.236558914  
H 1.876358032 -0.538643181 7.305772781  
H 2.006185055 1.098446488 7.964631557  
H 0.422807664 0.427491844 7.524490833  
C 0.619893312 -1.062202334 4.955349445  
H 1.394845963 -1.729171038 5.353530884  
H -0.180439875 -1.038974762 5.701844692  
H 0.221165463 -1.518584490 4.052154064

L3\_120

=====  
C 0.935237944 -0.044360638 2.253018379  
C -0.448033780 -0.090284951 1.945568442  
C -0.890825272 -1.025664330 1.001730561  
C -0.025051916 -1.893445373 0.334289074  
C 1.335612178 -1.815140963 0.637518585  
C 1.831308246 -0.916409194 1.586681247  
C 1.437744617 0.799147487 3.395545006  
C 2.138055325 2.066330910 3.235205412  
C 2.537320137 2.784324169 4.387307167  
C 2.316147804 2.209320784 5.651766777  
C 1.774713755 0.935681581 5.821156502  
C 1.344221711 0.224438220 4.683206558  
H -1.947335839 -1.069246769 0.757141948  
H 2.030871630 -2.476158142 0.126945332  
P 2.403721333 3.018516302 1.628625274  
C 1.759785414 2.123240232 0.088922217  
C 2.526672602 2.512649298 -1.198993444  
C 1.998037457 1.690460086 -2.390045166  
C 0.493230820 1.897021651 -2.606701612  
C -0.289088756 1.606104016 -1.319491506  
C 0.265491962 2.420680761 -0.142609209  
H 1.886280179 1.052810669 0.250610560  
H 3.603137493 2.340536833 -1.114149094  
H 2.387824535 3.584502935 -1.398299456  
H 2.557710886 1.956990242 -3.294915438  
H 2.194894075 0.625467360 -2.197852612  
H 0.314642400 2.937966585 -2.911830425  
H -1.351930141 1.839337349 -1.459205151  
H -0.228225291 0.538198948 -1.077883244  
H -0.313235134 2.239639044 0.759708762  
H 0.156354070 3.489539146 -0.361021549  
H 0.137017608 1.262527823 -3.427796841  
C 4.291119576 2.933709145 1.357814550  
C 5.196824074 2.442353725 2.505872488  
C 6.634930134 2.258291721 1.986547351  
C 7.186879158 3.565879107 1.397244215  
C 6.273465633 4.103032112 0.284725070  
C 4.821957111 4.259648323 0.770616829  
H 4.378021240 2.167098284 0.581405282  
H 4.821519852 1.503087163 2.920489788  
H 5.216857910 3.162922382 3.327594042  
H 7.276229382 1.904668808 2.802901030  
H 6.647049427 1.474824667 1.214705706  
H 7.259045601 4.316582203 2.197353363  
H 6.645272732 5.063721657 -0.090174146  
H 6.289148808 3.405587912 -0.565666735  
H 4.189286232 4.600369453 -0.057488944  
H 4.775283337 5.042621136 1.540822387  
H 8.203530312 3.414945364 1.015141606  
Pd 1.537541866 5.158121586 1.507827997  
C 3.329423189 -0.918970823 1.884489655  
H 3.545125723 -0.056687064 2.518513680  
C 4.188283920 -0.784271717 0.612651289  
C 3.737160683 -2.179169893 2.669970989  
H 3.187835455 -2.254344225 3.611801624  
H 3.530237913 -3.083936453 2.087335825

|    |              |              |              |    |              |              |              |
|----|--------------|--------------|--------------|----|--------------|--------------|--------------|
| H  | 4.808625698  | -2.163133621 | 2.900192976  | C  | -0.347373724 | -0.128661782 | 1.924377561  |
| H  | 4.124478340  | -1.678169131 | -0.017027827 | C  | -0.787458777 | -1.046569586 | 0.962948680  |
| H  | 5.242167473  | -0.648405612 | 0.880455971  | C  | 0.082559973  | -1.901064277 | 0.282899171  |
| H  | 3.881837845  | 0.069829017  | 0.001892741  | C  | 1.441521287  | -1.830446124 | 0.593278766  |
| C  | -1.463846803 | 0.856878877  | 2.595374584  | C  | 1.933612227  | -0.948110044 | 1.559080482  |
| H  | -0.951445878 | 1.804001451  | 2.788812876  | C  | 1.526948690  | 0.752273679  | 3.382514715  |
| C  | -1.988223433 | 0.352629453  | 3.955212116  | C  | 2.138055325  | 2.066330910  | 3.235205412  |
| C  | -2.672238827 | 1.159779310  | 1.688682914  | C  | 2.507662058  | 2.785311460  | 4.397372723  |
| H  | -2.374434471 | 1.425797105  | 0.671511412  | C  | 2.318192720  | 2.181483030  | 5.654596329  |
| H  | -3.354033709 | 0.303409636  | 1.627825260  | C  | 1.850332975  | 0.877634883  | 5.809179783  |
| H  | -3.233072042 | 2.000365257  | 2.103639841  | C  | 1.462509394  | 0.157799020  | 4.661939621  |
| H  | -2.385792971 | -0.665401936 | 3.870304823  | H  | -1.843388081 | -1.085968733 | 0.714413226  |
| H  | -2.795993805 | 1.006106019  | 4.302808762  | H  | 2.138125658  | -2.482707500 | 0.073459476  |
| H  | -1.209874034 | 0.358484328  | 4.717776775  | P  | 2.403721333  | 3.018516302  | 1.628625274  |
| C  | -0.546818078 | -2.863093853 | -0.715774417 | C  | 1.761100769  | 2.146715879  | 0.080664255  |
| H  | -1.637639284 | -2.743749142 | -0.758069158 | C  | 2.538472652  | 2.549936056  | -1.197116137 |
| C  | -0.251035333 | -4.326206207 | -0.339400411 | C  | 2.009844780  | 1.752089381  | -2.405252457 |
| C  | 0.013521545  | -2.527832031 | -2.111521721 | C  | 0.507489383  | 1.973796725  | -2.628366947 |
| H  | -0.227042705 | -1.498993397 | -2.398863792 | C  | -0.283297360 | 1.668151498  | -1.349205732 |
| H  | 1.104235530  | -2.633998156 | -2.132392883 | C  | 0.272087753  | 2.459573030  | -0.156724691 |
| H  | -0.401995093 | -3.201095343 | -2.869864225 | H  | 1.883335233  | 1.073210835  | 0.228347182  |
| H  | 0.827930152  | -4.514851093 | -0.302830130 | H  | 3.612945795  | 2.368177176  | -1.107621789 |
| H  | -0.682968557 | -5.011613369 | -1.077197552 | H  | 2.409513712  | 3.625954628  | -1.379305720 |
| H  | -0.666765034 | -4.573124886 | 0.642741621  | H  | 2.576974869  | 2.030218601  | -3.301917315 |
| C  | -0.236492336 | 4.725283623  | 2.303000450  | H  | 2.197433472  | 0.682489276  | -2.230265856 |
| C  | -1.356505275 | 5.009603500  | 1.512933612  | H  | 0.338287890  | 3.020824909  | -2.917402744 |
| C  | -0.390658706 | 4.311841011  | 3.625190973  | H  | -1.343716621 | 1.912111163  | -1.489466548 |
| C  | -2.633615017 | 4.869360924  | 2.060971737  | H  | -0.231624529 | 0.596127212  | -1.124584317 |
| C  | -1.676932096 | 4.178466320  | 4.163105488  | H  | -0.313783079 | 2.271361351  | 0.739914119  |
| C  | -2.799411535 | 4.454633713  | 3.384822130  | H  | 0.172819227  | 3.531743765  | -0.359715313 |
| H  | -1.240807533 | 5.370138168  | 0.497636378  | H  | 0.151412517  | 1.354776263  | -3.461226940 |
| H  | 0.461636364  | 4.072751045  | 4.243638992  | C  | 4.297286510  | 2.918902874  | 1.383467078  |
| H  | -3.501551390 | 5.095891953  | 1.446748734  | C  | 5.174002171  | 2.435648441  | 2.557427168  |
| H  | -1.788616061 | 3.849121332  | 5.193388939  | C  | 6.626562119  | 2.248615265  | 2.081830740  |
| H  | -3.796315908 | 4.352437496  | 3.805049896  | C  | 7.195291042  | 3.550624847  | 1.496666312  |
| Cl | 1.070243239  | 7.413683891  | 1.036108971  | C  | 6.311480999  | 4.078574657  | 0.356603801  |
| O  | 2.691408873  | 2.932786226  | 6.772640705  | C  | 4.848347664  | 4.241154671  | 0.804485500  |
| C  | 1.634788990  | 3.721701622  | 7.327329636  | H  | 4.398890495  | 2.149080038  | 0.612076104  |
| H  | 1.251825452  | 4.451606274  | 6.602734566  | H  | 4.788914204  | 1.500476003  | 2.971500635  |
| H  | 0.802145362  | 3.090107203  | 7.664771080  | H  | 5.168912411  | 3.164183855  | 3.372976303  |
| H  | 2.057011843  | 4.252602577  | 8.183441162  | H  | 7.244179726  | 1.902494431  | 2.919389009  |
| C  | 3.143029213  | 4.177151203  | 4.396781445  | H  | 6.661096096  | 1.458492279  | 1.317659497  |
| H  | 2.375624180  | 4.936892986  | 4.585062027  | H  | 7.247405052  | 4.308047771  | 2.291965008  |
| H  | 3.880813837  | 4.255041122  | 5.197895527  | H  | 6.693203926  | 5.036071777  | -0.016367259 |
| H  | 3.616237879  | 4.462098122  | 3.462401152  | H  | 6.347849369  | 3.374026775  | -0.487280667 |
| C  | 1.662428617  | 0.340072989  | 7.204075336  | H  | 4.239314556  | 4.581746101  | -0.040877450 |
| H  | 2.107627392  | -0.659994185 | 7.241480350  | H  | 4.789328575  | 5.027490139  | 1.570869565  |
| H  | 2.170559168  | 0.966277957  | 7.937752724  | H  | 8.221384048  | 3.395555258  | 1.142484188  |
| H  | 0.613784969  | 0.229766205  | 7.508332253  | Pd | 1.694913387  | 5.217796326  | 1.569218993  |
| C  | 0.817614198  | -1.182273030 | 4.902581692  | C  | 3.430547237  | -0.949324012 | 1.858567357  |
| H  | 1.622171640  | -1.832007408 | 5.269018173  | H  | 3.639402866  | -0.099657908 | 2.512097359  |
| H  | 0.030749511  | -1.205038071 | 5.663505554  | C  | 4.285286427  | -0.781450033 | 0.587613761  |
| H  | 0.417046517  | -1.628980398 | 3.995121241  | C  | 3.849066734  | -2.224653482 | 2.613304853  |
|    |              |              |              | H  | 3.298023701  | -2.331334352 | 3.550885677  |
|    |              |              |              | H  | 3.654462814  | -3.116259098 | 2.006658792  |
|    |              |              |              | H  | 4.919594765  | -2.202636242 | 2.847055435  |
|    |              |              |              | H  | 4.227611542  | -1.664179206 | -0.058352821 |
|    |              |              |              | H  | 5.338675976  | -0.639530122 | 0.853601694  |

=====  
L3\_130  
=====

C 1.034897685 -0.088324577 2.235118151

H 3.966562748 0.079795644 -0.006452006  
C -1.358665109 0.809287250 2.593125820  
H -0.843288004 1.753459454 2.796001196  
C -1.871973991 0.279727846 3.947654247  
C -2.575426102 1.129403591 1.703938365  
H -2.290922642 1.397711992 0.683781922  
H -3.266564131 0.280411094 1.648516893  
H -3.121190548 1.975175619 2.130285025  
H -2.273101091 -0.735022426 3.843798399  
H -2.676082134 0.926141083 4.316757202  
H -1.086694717 0.265775204 4.702840805  
C -0.434548289 -2.849437952 -0.788996458  
H -1.524796247 -2.727016449 -0.835748196  
C -0.144247204 -4.320139408 -0.439152747  
C 0.135263860 -2.488899946 -2.174678564  
H -0.099797100 -1.453829885 -2.443537235  
H 1.225706220 -2.598622084 -2.191235065  
H -0.277947128 -3.145731688 -2.948472261  
H 0.934051871 -4.511722088 -0.398948222  
H -0.572483301 -4.990126610 -1.193053126  
H -0.567159832 -4.585218906 0.535131395  
C -0.151361212 4.819693089 2.195394754  
C -1.193467855 5.222095013 1.352098942  
C -0.424510539 4.292626381 3.457072973  
C -2.514477491 5.086262226 1.784278989  
C -1.754114866 4.169248581 3.880672216  
C -2.799784184 4.563794613 3.048365593  
H -0.982259691 5.664177418 0.385289758  
H 0.367366165 3.955343485 4.111423969  
H -3.322390556 5.403085709 1.129499435  
H -1.960992694 3.753458261 4.864035130  
H -3.829970360 4.468831062 3.380807877  
Cl 1.408491015 7.528734207 1.238192916  
O 2.659025908 2.906071424 6.785425663  
C 1.570291996 3.652164698 7.337193966  
H 1.167558670 4.372753620 6.613838196  
H 0.758774400 2.987835884 7.663044930  
H 1.966088772 4.191780567 8.200404167  
C 3.078012466 4.192386150 4.430065632  
H 2.291164398 4.935179710 4.605534554  
H 3.793753862 4.279082775 5.250105381  
H 3.572411776 4.490690231 3.510504484  
C 1.768410206 0.260667413 7.184372902  
H 2.266952753 -0.714215577 7.210799694  
H 2.240278006 0.905288637 7.926218987  
H 0.726701975 0.090367571 7.484743118  
C 1.005133510 -1.275378942 4.861009598  
H 1.837715626 -1.890367627 5.224449635  
H 0.215716973 -1.345575571 5.616533279  
H 0.631411433 -1.728550673 3.945093393

=====  
L3\_140  
=====

C 1.270371675 -0.300359249 1.982263684  
C -0.043367587 -0.317640036 1.455658197  
C -0.414909989 -1.366432905 0.605694592  
C 0.463681668 -2.394042730 0.260558873

C 1.766094446 -2.338226080 0.764770210  
C 2.192270517 -1.311636806 1.612245679  
C 1.605141521 0.645477295 3.106796741  
C 2.028078794 2.027625322 2.931819439  
C 2.317346573 2.780409336 4.109380245  
C 2.077911139 2.205447435 5.373458862  
C 1.618600011 0.902213037 5.544702053  
C 1.368327260 0.124683499 4.399802685  
H -1.423309803 -1.389042377 0.202334329  
H 2.469862700 -3.117806673 0.488159835  
P 2.346892595 2.960975647 1.323379755  
C 1.789113760 2.027655602 -0.210715294  
C 2.764721394 0.978128970 -0.771550477  
C 2.123573542 0.206166759 -1.935359240  
C 1.701681018 1.160034776 -3.060757399  
C 0.758811891 2.246739149 -2.523484468  
C 1.365352392 3.009234428 -1.330968976  
H 0.889823318 1.505659699 0.120915785  
H 3.058345556 0.284292519 0.009680133  
H 3.674096823 1.470981002 -1.133271575  
H 2.826676369 -0.549862385 -2.306687832  
H 1.248797059 -0.336893022 -1.557456017  
H 2.596711636 1.634977460 -3.488843203  
H 0.499288350 2.959872484 -3.315011024  
H -0.182320818 1.777255297 -2.204093695  
H 0.639334500 3.729964495 -0.946876287  
H 2.234981298 3.587941170 -1.668603539  
H 1.219522715 0.606097579 -3.875494003  
C 4.220822811 3.216627359 1.263469458  
C 4.683493614 3.907580137 -0.040926505  
C 6.171744823 4.287799358 0.050257038  
C 7.043010712 3.065202951 0.376878381  
C 6.579422474 2.390582323 1.676687121  
C 5.093690872 1.995791435 1.607775807  
H 4.379483223 3.948954821 2.062160254  
H 4.082877159 4.804572105 -0.239964053  
H 4.539348125 3.239899397 -0.897412181  
H 6.490965366 4.749235630 -0.891528785  
H 6.301738739 5.048446178 0.833088934  
H 6.975767136 2.342153549 -0.449343652  
H 7.186040401 1.501732111 1.889106274  
H 6.730352402 3.082492352 2.517885447  
H 4.775348186 1.577622056 2.568144083  
H 4.964717388 1.213327169 0.853523076  
H 8.096809387 3.357870817 0.453743815  
Pd 1.614886045 5.151897907 1.269443750  
C 3.638393164 -1.310392499 2.116529942  
H 3.862181425 -0.294248283 2.448661566  
C 4.660699844 -1.684961081 1.024113417  
C 3.841162205 -2.240544319 3.327358961  
H 3.302402973 -1.880947113 4.203233242  
H 3.491839170 -3.253437042 3.098636150  
H 4.903675556 -2.299845457 3.588997126  
H 4.620030880 -2.753214598 0.785342872  
H 5.675767899 -1.472495914 1.376666903  
H 4.504023075 -1.132940650 0.093865007  
C -1.063391089 0.766086280 1.809358954  
H -0.517103732 1.654049635 2.135355234

|    |              |              |              |    |              |              |              |
|----|--------------|--------------|--------------|----|--------------|--------------|--------------|
| C  | -1.964864373 | 0.344744235  | 2.984754801  | C  | 2.215908527  | 2.094645500  | 3.349510431  |
| C  | -1.932175994 | 1.193792939  | 0.614793003  | C  | 2.604262829  | 2.909260988  | 4.453195095  |
| H  | -1.323112726 | 1.455040455  | -0.255034059 | C  | 2.776469469  | 2.307627916  | 5.715774059  |
| H  | -2.631223679 | 0.406446218  | 0.312467039  | C  | 2.671480656  | 0.933224022  | 5.925980091  |
| H  | -2.517732143 | 2.074660540  | 0.886780262  | C  | 2.295244694  | 0.117498130  | 4.845198631  |
| H  | -2.509055138 | -0.576789081 | 2.747476339  | H  | -1.405472517 | -1.695373654 | 1.491861820  |
| H  | -2.695094585 | 1.133192658  | 3.194422483  | H  | 2.579200029  | -2.500944614 | 0.198030174  |
| H  | -1.383496881 | 0.174023598  | 3.892963648  | P  | 2.201776028  | 3.005418539  | 1.692993164  |
| C  | 0.019275524  | -3.528978586 | -0.651081920 | C  | 1.423330784  | 2.007753134  | 0.300437599  |
| H  | -1.033516884 | -3.349551916 | -0.906800449 | C  | 1.964658618  | 2.402228832  | -1.093807340 |
| C  | 0.100334711  | -4.890030861 | 0.064589649  | C  | 1.342841148  | 1.491838813  | -2.170627356 |
| C  | 0.820874274  | -3.549710989 | -1.966361165 | C  | -0.190752804 | 1.562770724  | -2.166352987 |
| H  | 0.733939826  | -2.597906113 | -2.499624014 | C  | -0.749511659 | 1.254716873  | -0.769999504 |
| H  | 1.885367513  | -3.728295803 | -1.776320338 | C  | -0.108991921 | 2.159765244  | 0.292111188  |
| H  | 0.461839139  | -4.347208023 | -2.626626968 | H  | 1.676724553  | 0.961624444  | 0.474260360  |
| H  | 1.134990215  | -5.134006977 | 0.331203133  | H  | 3.053731441  | 2.316561937  | -1.150810122 |
| H  | -0.274883240 | -5.691846371 | -0.581211209 | H  | 1.711242080  | 3.450829268  | -1.302923441 |
| H  | -0.490072161 | -4.887108326 | 0.986472011  | H  | 1.737663388  | 1.768389344  | -3.155812979 |
| C  | -0.254988313 | 4.688474655  | 1.746370912  | H  | 1.658878922  | 0.455317229  | -1.981658816 |
| C  | -1.245738864 | 5.002799988  | 0.810440838  | H  | -0.504051626 | 2.572883844  | -2.466276169 |
| C  | -0.595627785 | 4.220375538  | 3.015507460  | H  | -1.838306069 | 1.388980746  | -0.757686257 |
| C  | -2.590103149 | 4.846692562  | 1.161269665  | H  | -0.555068851 | 0.205675617  | -0.514416158 |
| C  | -1.945487142 | 4.065770626  | 3.351705074  | H  | -0.527680755 | 1.957609057  | 1.277350903  |
| C  | -2.943880320 | 4.377660275  | 2.428498507  | H  | -0.354409873 | 3.202810764  | 0.070123114  |
| H  | -0.983560801 | 5.405049324  | -0.161870271 | H  | -0.604670107 | 0.869985282  | -2.909671307 |
| H  | 0.166506320  | 3.969243288  | 3.742840767  | C  | 4.052246571  | 3.021888256  | 1.215552926  |
| H  | -3.361139297 | 5.103037357  | 0.438962132  | C  | 5.093796253  | 2.839394331  | 2.339933157  |
| H  | -2.208924294 | 3.699467182  | 4.341148853  | C  | 6.507065773  | 2.725661278  | 1.739472032  |
| H  | -3.990841627 | 4.261093140  | 2.695047855  | C  | 6.859907150  | 3.959388018  | 0.894660890  |
| Cl | 1.377563953  | 7.472708702  | 0.989257455  | C  | 5.806064129  | 4.203272343  | -0.195238292 |
| O  | 2.341115713  | 2.963516235  | 6.505003929  | C  | 4.390781879  | 4.293155193  | 0.401042998  |
| C  | 1.194424033  | 3.656104088  | 7.007980347  | H  | 4.155535221  | 2.153032541  | 0.556186259  |
| H  | 0.791951239  | 4.355607033  | 6.263091564  | H  | 4.869815350  | 1.959167838  | 2.947141647  |
| H  | 0.398888499  | 2.958010674  | 7.299228191  | H  | 5.074377537  | 3.697527647  | 3.019046545  |
| H  | 1.526412606  | 4.214508057  | 7.886071205  | H  | 7.237215519  | 2.592201233  | 2.546771288  |
| C  | 2.928479433  | 4.168980598  | 4.142643929  | H  | 6.564009666  | 1.824334264  | 1.112161040  |
| H  | 2.604596853  | 4.795265675  | 3.306528091  | H  | 6.908495903  | 4.840641975  | 1.550195813  |
| H  | 2.677068233  | 4.692353249  | 5.062140942  | H  | 6.031698227  | 5.120270252  | -0.751848340 |
| H  | 4.022354126  | 4.101211071  | 4.115666866  | H  | 5.833137035  | 3.377691507  | -0.921702206 |
| C  | 1.405356169  | 0.343847632  | 6.931000233  | H  | 3.662383080  | 4.463108540  | -0.397581220 |
| H  | 1.867599010  | -0.643052757 | 7.035173893  | H  | 4.338109493  | 5.169449329  | 1.065346956  |
| H  | 1.837398529  | 1.001797318  | 7.685135365  | H  | 7.854205132  | 3.845570087  | 0.446500510  |
| H  | 0.337746531  | 0.215807453  | 7.151376724  | Pd | 1.482188582  | 5.229863167  | 1.664327621  |
| C  | 0.787210226  | -1.260803819 | 4.628675938  | C  | 3.898237467  | -0.710768759 | 1.711735487  |
| H  | 1.461348891  | -1.890506744 | 5.218954563  | H  | 4.059627056  | 0.226933181  | 2.248559237  |
| H  | -0.144157633 | -1.189103365 | 5.202250957  | C  | 4.464842319  | -0.539693177 | 0.288638681  |
| H  | 0.568210423  | -1.788255215 | 3.704009533  | C  | 4.679516315  | -1.807983398 | 2.457709074  |

=====  
L3\_150  
=====

|   |              |              |             |   |              |              |              |
|---|--------------|--------------|-------------|---|--------------|--------------|--------------|
| C | 1.502370834  | -0.259584159 | 2.529330015 | H | 5.490221500  | -0.156393185 | 0.329434872  |
| C | 0.109313928  | -0.509809196 | 2.451376200 | H | 3.863133430  | 0.152591690  | -0.307130486 |
| C | -0.340993136 | -1.497543693 | 1.566602468 | C | -0.905689359 | 0.272443056  | 3.293984413  |
| C | 0.523591757  | -2.226836681 | 0.748473704 | H | -0.519645870 | 1.290217638  | 3.412321329  |
| C | 1.889797807  | -1.952737451 | 0.833802700 | C | -1.078188300 | -0.317055374 | 4.708382130  |
| C | 2.396062851  | -0.984124303 | 1.704945564 | C | -2.295575857 | 0.386672795  | 2.639205694  |
| C | 2.027980089  | 0.685387433  | 3.580029488 | H | -2.242770195 | 0.677582264  | 1.587733030  |



|    |              |              |              |    |              |              |              |
|----|--------------|--------------|--------------|----|--------------|--------------|--------------|
| H  | -2.847200871 | -0.558383644 | 2.699906826  | C  | 2.827637911  | 0.921335995  | 5.899068832  |
| H  | -2.883520603 | 1.145774245  | 3.162875175  | C  | 2.463249683  | 0.102629863  | 4.816465855  |
| H  | -1.335731268 | -1.381035686 | 4.656222343  | H  | -1.414779067 | -1.660000563 | 1.617096782  |
| H  | -1.888698220 | 0.200647935  | 5.233981609  | H  | 2.499150515  | -2.495287418 | 0.141761690  |
| H  | -0.172842383 | -0.209119275 | 5.304818153  | P  | 2.201776028  | 3.005418539  | 1.692993164  |
| C  | -0.016601156 | -3.243526936 | -0.246245086 | C  | 1.336368680  | 2.041387081  | 0.337080508  |
| H  | -1.103075743 | -3.300985575 | -0.097328342 | C  | 1.839850187  | 2.416124344  | -1.075308084 |
| C  | 0.561560810  | -4.649415016 | -0.007878128 | C  | 1.144597292  | 1.528215408  | -2.125600815 |
| C  | 0.231558457  | -2.780714035 | -1.695799112 | C  | -0.384847879 | 1.651088953  | -2.058816433 |
| H  | -0.207822502 | -1.794470668 | -1.877881646 | C  | -0.899137080 | 1.362129569  | -0.640788972 |
| H  | 1.305101871  | -2.711432695 | -1.906033039 | C  | -0.188965708 | 2.246953726  | 0.394162059  |
| H  | -0.204176664 | -3.487445116 | -2.410999060 | H  | 1.559188366  | 0.987154365  | 0.502672255  |
| H  | 1.645769238  | -4.665163040 | -0.166510001 | H  | 2.922841311  | 2.291004658  | -1.169245362 |
| H  | 0.115483619  | -5.373407841 | -0.698615789 | H  | 1.617985249  | 3.473495960  | -1.276067615 |
| H  | 0.368328452  | -4.987980366 | 1.015005112  | H  | 1.507806778  | 1.791209340  | -3.126537323 |
| C  | -0.356549352 | 4.784776211  | 2.282717943  | H  | 1.432563305  | 0.481507808  | -1.948492885 |
| C  | -1.410119176 | 5.237154007  | 1.479871869  | H  | -0.675743520 | 2.671232700  | -2.347098827 |
| C  | -0.616824985 | 4.088188171  | 3.464422703  | H  | -1.981886268 | 1.530383348  | -0.586600065 |
| C  | -2.727046490 | 4.963299274  | 1.859390736  | H  | -0.726918101 | 0.307394892  | -0.391095161 |
| C  | -1.943318129 | 3.834866047  | 3.839795113  | H  | -0.571514904 | 2.053803205  | 1.396592617  |
| C  | -3.000028849 | 4.260581493  | 3.035591364  | H  | -0.410830379 | 3.298481464  | 0.185989588  |
| H  | -1.210238338 | 5.805685997  | 0.578917682  | H  | -0.851392746 | 0.972763121  | -2.784088850 |
| H  | 0.186222985  | 3.718374491  | 4.090407848  | C  | 4.042588711  | 2.951054335  | 1.193014622  |
| H  | -3.542480469 | 5.313101292  | 1.231009841  | C  | 5.072160244  | 2.766114950  | 2.328347206  |
| H  | -2.138017654 | 3.291188002  | 4.761495113  | C  | 6.487095833  | 2.609450817  | 1.743534327  |
| H  | -4.026742458 | 4.056483746  | 3.326200962  | C  | 6.874432087  | 3.816320181  | 0.875564933  |
| Cl | 1.199608803  | 7.547377110  | 1.394351959  | C  | 5.833547592  | 4.063563347  | -0.226234332 |
| O  | 3.122320414  | 3.103482962  | 6.796628475  | C  | 4.416738987  | 4.199151993  | 0.358397901  |
| C  | 1.997820735  | 3.652032375  | 7.489085197  | H  | 4.121480942  | 2.071513891  | 0.544774532  |
| H  | 1.394488573  | 4.292541981  | 6.833057880  | H  | 4.825717449  | 1.903412938  | 2.952357292  |
| H  | 1.359544992  | 2.856428862  | 7.895446777  | H  | 5.060791492  | 3.639128685  | 2.990054131  |
| H  | 2.397834539  | 4.251911640  | 8.309551239  | H  | 7.207782269  | 2.476765633  | 2.559443951  |
| C  | 2.863869429  | 4.405185699  | 4.410923958  | H  | 6.528007507  | 1.693367481  | 1.136494517  |
| H  | 1.934754252  | 4.982724667  | 4.452600956  | H  | 6.940591335  | 4.709477901  | 1.513128161  |
| H  | 3.476806164  | 4.692677498  | 5.265657425  | H  | 6.084325790  | 4.964182854  | -0.798507690 |
| H  | 3.382454872  | 4.729239941  | 3.510393381  | H  | 5.845291138  | 3.223615885  | -0.936487377 |
| C  | 2.942822933  | 0.348611534  | 7.290345192  | H  | 3.697586060  | 4.372441292  | -0.447812349 |
| H  | 3.659023762  | -0.478049219 | 7.231790066  | H  | 4.383463383  | 5.089404106  | 1.006272793  |
| H  | 3.346795321  | 1.105562568  | 7.962469101  | H  | 7.868117809  | 3.669186354  | 0.435923517  |
| H  | 2.026993990  | -0.059763160 | 7.736569405  | Pd | 1.653574944  | 5.278356075  | 1.689527392  |
| C  | 2.177040815  | -1.372033834 | 5.104803562  | C  | 3.904649496  | -0.735959530 | 1.611034393  |
| H  | 3.147397280  | -1.786454082 | 5.401767731  | H  | 4.098521709  | 0.199459448  | 2.140955210  |
| H  | 1.488005519  | -1.577508569 | 5.931541920  | C  | 4.408319950  | -0.570271969 | 0.163227931  |
| H  | 1.827799797  | -1.925165892 | 4.235350609  | C  | 4.710118771  | -1.842177153 | 2.318100929  |

=====  
L3\_160  
=====

|   |              |              |             |   |              |              |              |
|---|--------------|--------------|-------------|---|--------------|--------------|--------------|
| C | 1.555011511  | -0.269810081 | 2.543966770 | H | 5.436181068  | -0.191452280 | 0.157803044  |
| C | 0.155227572  | -0.505004227 | 2.523346186 | H | 3.784442425  | 0.122602277  | -0.409279764 |
| C | -0.345459133 | -1.475808144 | 1.648012757 | C | -0.820001364 | 0.276263595  | 3.413502216  |
| C | 0.473778009  | -2.204900265 | 0.784613848 | H | -0.423139304 | 1.291014552  | 3.524361610  |
| C | 1.845020533  | -1.947330952 | 0.813875198 | C | -0.936183214 | -0.328928739 | 4.827742577  |
| C | 2.401186943  | -0.993800581 | 1.671720028 | C | -2.234930754 | 0.399623841  | 2.815806866  |
| C | 2.126667261  | 0.674635112  | 3.573275805 | H | -2.222362995 | 0.692067564  | 1.763367891  |
| C | 2.215908527  | 2.094645500  | 3.349510431 | H | -2.789726973 | -0.542303801 | 2.896964312  |
| C | 2.613099098  | 2.909414053  | 4.453242779 | H | -2.797974348 | 1.160795450  | 3.364149332  |
| C | 2.850780964  | 2.300353765  | 5.703372955 | H | -1.208542943 | -1.389032602 | 4.772038937  |

|    |              |              |              |    |              |              |              |
|----|--------------|--------------|--------------|----|--------------|--------------|--------------|
| H  | -1.715869784 | 0.190126106  | 5.396855831  | H  | 3.339499235  | -2.704682827 | 0.520581245  |
| H  | -0.003665087 | -0.241321042 | 5.384888172  | P  | 2.201776028  | 3.005418539  | 1.692993164  |
| C  | -0.121510677 | -3.202552795 | -0.197833955 | C  | 1.237029552  | 2.277600288  | 0.248864114  |
| H  | -1.200886369 | -3.250702620 | -0.001463964 | C  | -0.261287451 | 2.184504986  | 0.571946502  |
| C  | 0.451838762  | -4.617314339 | -0.004096664 | C  | -1.091647744 | 1.935428619  | -0.698246658 |
| C  | 0.066442952  | -2.722225904 | -1.650624752 | C  | -0.585137248 | 0.708569705  | -1.473086596 |
| H  | -0.370115072 | -1.729119539 | -1.799498439 | C  | 0.909056902  | 0.850543320  | -1.799219966 |
| H  | 1.130144000  | -2.660914660 | -1.908005953 | C  | 1.735193253  | 1.038860321  | -0.513316989 |
| H  | -0.408410102 | -3.414562941 | -2.354904413 | H  | 1.353557348  | 3.126240015  | -0.435906500 |
| H  | 1.527584195  | -4.641447067 | -0.211676374 | H  | -0.600592256 | 3.099969387  | 1.067723751  |
| H  | -0.032387216 | -5.327547550 | -0.683440745 | H  | -0.411777139 | 1.364493370  | 1.269120932  |
| H  | 0.301508963  | -4.967405319 | 1.022114992  | H  | -2.148161411 | 1.810956597  | -0.427462399 |
| C  | -0.231594399 | 4.946662903  | 2.248903275  | H  | -1.032065511 | 2.824355364  | -1.339481115 |
| C  | -1.225202799 | 5.530704498  | 1.454058290  | H  | -0.730108917 | -0.196062475 | -0.864212513 |
| C  | -0.583196640 | 4.189750671  | 3.369651079  | H  | 1.272174835  | -0.033217344 | -2.338669538 |
| C  | -2.570682526 | 5.330071449  | 1.778804779  | H  | 1.057006478  | 1.713884473  | -2.464210749 |
| C  | -1.934681296 | 4.007458210  | 3.688953638  | H  | 2.793529749  | 1.142338872  | -0.772222519 |
| C  | -2.932273149 | 4.567268848  | 2.892067671  | H  | 1.638510108  | 0.143825889  | 0.095730506  |
| H  | -0.956884801 | 6.145503998  | 0.602730095  | H  | -1.167891264 | 0.571526885  | -2.392269850 |
| H  | 0.165649623  | 3.715829611  | 3.990906477  | C  | 4.001518250  | 2.767978430  | 1.186965466  |
| H  | -3.338480234 | 5.783114910  | 1.156362414  | C  | 5.006998539  | 3.175942659  | 2.283876419  |
| H  | -2.196672440 | 3.415029287  | 4.562660217  | C  | 6.451084614  | 2.876341581  | 1.845712185  |
| H  | -3.979942083 | 4.419001102  | 3.138549566  | C  | 6.792090416  | 3.557350874  | 0.512304008  |
| Cl | 1.550389886  | 7.618109703  | 1.480443478  | C  | 5.773085117  | 3.190003633  | -0.575989306 |
| O  | 3.193041801  | 3.098773956  | 6.783134460  | C  | 4.339478970  | 3.510047674  | -0.120910123 |
| C  | 2.065978765  | 3.599125147  | 7.506560802  | H  | 4.102910519  | 1.694708705  | 1.016321778  |
| H  | 1.422747135  | 4.219837666  | 6.869482040  | H  | 4.792635441  | 2.659209013  | 3.224201918  |
| H  | 1.469046116  | 2.776699305  | 7.922377110  | H  | 4.908740520  | 4.253471375  | 2.476453543  |
| H  | 2.462549686  | 4.208834648  | 8.321410179  | H  | 7.146912575  | 3.199245691  | 2.629562140  |
| C  | 2.861603975  | 4.408197403  | 4.427577496  | H  | 6.576597691  | 1.789186239  | 1.744563222  |
| H  | 1.935162902  | 4.986412525  | 4.498776436  | H  | 6.783931732  | 4.647470474  | 0.654824913  |
| H  | 3.491081238  | 4.684621334  | 5.273759842  | H  | 5.995001316  | 3.728529930  | -1.505324125 |
| H  | 3.365353107  | 4.744642735  | 3.522443771  | H  | 5.850818634  | 2.118031263  | -0.806677163 |
| C  | 3.168950319  | 0.333464324  | 7.245969296  | H  | 3.628959417  | 3.268711567  | -0.917280912 |
| H  | 3.926657200  | -0.452144027 | 7.154053211  | H  | 4.251780510  | 4.588196754  | 0.063312113  |
| H  | 3.550686359  | 1.101551771  | 7.918279648  | H  | 7.807060719  | 3.289025545  | 0.194742218  |
| H  | 2.289618254  | -0.130273610 | 7.711063385  | Pd | 1.829071045  | 5.313591957  | 1.707403302  |
| C  | 2.410135269  | -1.392904043 | 5.056651115  | C  | 4.396860123  | -0.758512795 | 2.003971815  |
| H  | 3.404277325  | -1.776424170 | 5.313576698  | H  | 4.482542992  | 0.203852803  | 2.517463446  |
| H  | 1.757274628  | -1.635193586 | 5.902555943  | C  | 5.094762802  | -0.645297110 | 0.631606579  |
| H  | 2.049299717  | -1.943197966 | 4.190495491  | C  | 5.153189182  | -1.801991701 | 2.851065397  |

=====  
L3\_170  
=====

|   |              |              |             |   |              |              |              |
|---|--------------|--------------|-------------|---|--------------|--------------|--------------|
| C | 1.888488412  | -0.378706485 | 2.547233582 | H | 6.098261833  | -0.223253101 | 0.748749912  |
| C | 0.535695493  | -0.795357823 | 2.414269447 | H | 4.539460182  | -0.016348468 | -0.067518629 |
| C | 0.242563069  | -1.862821460 | 1.558765531 | C | -0.610435843 | -0.155623332 | 3.211180449  |
| C | 1.229680657  | -2.557184219 | 0.858546615 | H | -0.369758099 | 0.903112888  | 3.353920221  |
| C | 2.555363417  | -2.165439129 | 1.043417096 | C | -0.751203299 | -0.781061232 | 4.615550995  |
| C | 2.909321070  | -1.093966603 | 1.871016502 | C | -1.982025385 | -0.247908056 | 2.510249376  |
| C | 2.226083755  | 0.671464920  | 3.570684671 | H | -1.943732738 | 0.029129416  | 1.454009891  |
| C | 2.215908527  | 2.094645500  | 3.349510431 | H | -2.393184662 | -1.261588693 | 2.573406696  |
| C | 2.372265577  | 2.977898121  | 4.448372841 | H | -2.693783760 | 0.418277025  | 3.008383751  |
| C | 2.597549915  | 2.443323135  | 5.728534222 | H | -0.829822123 | -1.871741056 | 4.546141624  |
| C | 2.711248398  | 1.071148157  | 5.951939106 | H | -1.657733202 | -0.406886995 | 5.104298592  |
| C | 2.508576155  | 0.187334612  | 4.873707294 | H | 0.095391780  | -0.534893394 | 5.254114628  |
| H | -0.789352119 | -2.174910545 | 1.433004022 | C | 0.860419452  | -3.683741808 | -0.094142653 |

|    |              |              |              |    |              |              |              |
|----|--------------|--------------|--------------|----|--------------|--------------|--------------|
| H  | -0.223102748 | -3.841416836 | -0.009053627 | C  | -0.306849450 | 2.257280111  | 0.631210983  |
| C  | 1.553817153  | -5.006424427 | 0.276682913  | C  | -1.174941659 | 2.043389082  | -0.619818807 |
| C  | 1.160770655  | -3.287461042 | -1.552543759 | C  | -0.716587186 | 0.815731525  | -1.422728896 |
| H  | 0.631480038  | -2.369349480 | -1.827755570 | C  | 0.772834480  | 0.924042225  | -1.783408761 |
| H  | 2.233015299  | -3.110811710 | -1.695992827 | C  | 1.633803606  | 1.075534940  | -0.515424371 |
| H  | 0.855389237  | -4.081238270 | -2.243571997 | H  | 1.305489779  | 3.170337915  | -0.411964357 |
| H  | 2.642356396  | -4.926084995 | 0.180333436  | H  | -0.611177742 | 3.175286531  | 1.145270586  |
| H  | 1.222524762  | -5.814332485 | -0.384936452 | H  | -0.460092664 | 1.433601499  | 1.325588584  |
| H  | 1.329491138  | -5.294655323 | 1.308652163  | H  | -2.226530790 | 1.938694715  | -0.323483139 |
| C  | 1.015100241  | 5.491891861  | -0.092931733 | H  | -1.110364079 | 2.938899517  | -1.251920938 |
| C  | 1.787937403  | 5.639029503  | -1.246649265 | H  | -0.870095789 | -0.093113951 | -0.822324634 |
| C  | -0.380618066 | 5.523382664  | -0.168161750 | H  | 1.099693060  | 0.038009189  | -2.341696262 |
| C  | 1.155410051  | 5.759865761  | -2.488786221 | H  | 0.926901937  | 1.791138172  | -2.441941023 |
| C  | -1.001764059 | 5.650511265  | -1.414736748 | H  | 2.688885450  | 1.153370619  | -0.795205295 |
| C  | -0.236727506 | 5.755862713  | -2.577941418 | H  | 1.525740981  | 0.177136928  | 0.086998641  |
| H  | 2.868795395  | 5.672416210  | -1.191552877 | H  | -1.325190425 | 0.705416143  | -2.328557730 |
| H  | -0.985748291 | 5.462782860  | 0.730260193  | C  | 3.989972353  | 2.715982437  | 1.170691967  |
| H  | 1.760077477  | 5.868055820  | -3.385978460 | C  | 5.003819942  | 3.119991541  | 2.262537479  |
| H  | -2.087432384 | 5.671847820  | -1.470364571 | C  | 6.443802834  | 2.804443836  | 1.823865175  |
| H  | -0.723016679 | 5.851940632  | -3.544842005 | C  | 6.791474342  | 3.467174768  | 0.483121246  |
| Cl | 1.780658841  | 7.652190208  | 1.966425657  | C  | 5.768815517  | 3.095894337  | -0.600139499 |
| O  | 2.758424997  | 3.305392981  | 6.800597668  | C  | 4.340428829  | 3.437094688  | -0.145170853 |
| C  | 1.540033579  | 3.605583668  | 7.486475945  | H  | 4.066136360  | 1.640070558  | 1.010718465  |
| H  | 0.817953050  | 4.098165035  | 6.821941853  | H  | 4.787713528  | 2.611500740  | 3.207021236  |
| H  | 1.082379341  | 2.696161270  | 7.897089005  | H  | 4.915860176  | 4.199501514  | 2.448636293  |
| H  | 1.799701095  | 4.282580376  | 8.303133011  | H  | 7.143041134  | 3.129389048  | 2.603757143  |
| C  | 2.330574751  | 4.491829872  | 4.343239307  | H  | 6.560883999  | 1.715528846  | 1.734872937  |
| H  | 1.323031425  | 4.856365681  | 4.107627869  | H  | 6.792811394  | 4.558782578  | 0.612923503  |
| H  | 2.633317232  | 4.952741146  | 5.283255577  | H  | 5.992757797  | 3.624061346  | -1.534914851 |
| H  | 3.042858839  | 4.882800579  | 3.598274469  | H  | 5.838253975  | 2.021945477  | -0.820944905 |
| C  | 3.023240805  | 0.557026207  | 7.337012291  | H  | 3.622029066  | 3.202226877  | -0.936944187 |
| H  | 3.862610817  | -0.146171927 | 7.318680763  | H  | 4.271865845  | 4.517544270  | 0.028422555  |
| H  | 3.282969475  | 1.378766060  | 8.004417419  | H  | 7.804141045  | 3.185869455  | 0.169482276  |
| H  | 2.169353247  | 0.017884117  | 7.766696453  | Pd | 2.008238554  | 5.335377216  | 1.717852354  |
| C  | 2.574964285  | -1.294938922 | 5.192031384  | C  | 4.451153755  | -0.769718587 | 1.878240943  |
| H  | 3.575915813  | -1.570969105 | 5.542080402  | H  | 4.577958584  | 0.177266896  | 2.411831141  |
| H  | 1.886292338  | -1.556102514 | 6.002797127  | C  | 5.095837116  | -0.639313638 | 0.481427908  |
| H  | 2.331635475  | -1.920927644 | 4.336960793  | C  | 5.221272945  | -1.851113558 | 2.664286852  |

=====  
L3\_180  
=====

|   |              |              |             |   |              |              |              |
|---|--------------|--------------|-------------|---|--------------|--------------|--------------|
| C | 1.962371707  | -0.352970988 | 2.504658222 | H | 5.102486610  | -2.831381321 | 2.188971519  |
| C | 0.602059543  | -0.761774123 | 2.417473316 | H | 6.291298389  | -1.614652991 | 2.680810690  |
| C | 0.270885259  | -1.820167542 | 1.564654589 | H | 5.167605400  | -1.613881826 | -0.012285196 |
| C | 1.226377368  | -2.512858629 | 0.820710063 | H | 6.113224983  | -0.244211689 | 0.565435469  |
| C | 2.559786320  | -2.131963015 | 0.963056445 | H | 4.526813507  | 0.019015649  | -0.178194314 |
| C | 2.952934265  | -1.072481632 | 1.789027572 | C | -0.512248695 | -0.129037246 | 3.264575481  |
| C | 2.325176001  | 0.694212735  | 3.525758028 | H | -0.276263297 | 0.932020545  | 3.393425465  |
| C | 2.215908527  | 2.094645500  | 3.349510431 | C | -0.582988739 | -0.752272189 | 4.675245285  |
| C | 2.377336502  | 2.969439030  | 4.456571579 | C | -1.913881421 | -0.232908204 | 2.628792524  |
| C | 2.685981989  | 2.422668219  | 5.711587906 | H | -1.926992416 | 0.045493919  | 1.572036386  |
| C | 2.878965378  | 1.051734209  | 5.897688389 | H | -2.313732862 | -1.249704838 | 2.710175276  |
| C | 2.670199871  | 0.185975775  | 4.808635235 | H | -2.606742859 | 0.427494317  | 3.160275459  |
| H | -0.766361177 | -2.126301527 | 1.475420833 | H | -0.664716601 | -1.843006492 | 4.610712528  |
| H | 3.320683479  | -2.672675610 | 0.408515692 | H | -1.464181423 | -0.377818435 | 5.208189964  |
| P | 2.201776028  | 3.005418539  | 1.692993164 | H | 0.294297785  | -0.505228519 | 5.270474911  |
| C | 1.184610605  | 2.318823099  | 0.268389940 | C | 0.814699352  | -3.626032352 | -0.130388245 |
|   |              |              |             | H | -0.264340848 | -3.784136772 | -0.000866216 |
|   |              |              |             | C | 1.521356583  | -4.954668999 | 0.190519139  |
|   |              |              |             | C | 1.052797914  | -3.208843231 | -1.594565749 |

|    |              |              |              |   |              |              |              |
|----|--------------|--------------|--------------|---|--------------|--------------|--------------|
| H  | 0.510891438  | -2.288129568 | -1.834356070 | H | -2.102344751 | -3.121136427 | -3.466869116 |
| H  | 2.117818832  | -3.027934074 | -1.780297399 | C | -1.077314973 | -0.506294072 | -3.317109346 |
| H  | 0.719636321  | -3.993373871 | -2.283352613 | H | -2.080377817 | -0.565333962 | -3.753362894 |
| H  | 2.604680538  | -4.874984264 | 0.046720907  | H | -0.359571278 | -0.452143759 | -4.143475533 |
| H  | 1.159081578  | -5.752651215 | -0.466863215 | H | -1.028583527 | 0.421715915  | -2.742371559 |
| H  | 1.342772365  | -5.257052422 | 1.227330685  | C | -5.262091160 | -1.448320389 | -0.130997866 |
| C  | 1.182570219  | 5.551710129  | -0.073908970 | H | -5.513536930 | -1.358317494 | -1.196084499 |
| C  | 1.940363526  | 5.725397587  | -1.234174013 | C | -5.924089909 | -2.736570358 | 0.396590173  |
| C  | -0.214268848 | 5.594424248  | -0.131735131 | H | -5.552516937 | -3.621216774 | -0.131618917 |
| C  | 1.292626739  | 5.886898041  | -2.463742733 | H | -7.011524677 | -2.691466093 | 0.268532127  |
| C  | -0.850683212 | 5.762281895  | -1.365912557 | H | -5.720116615 | -2.874042511 | 1.464509130  |
| C  | -0.100354448 | 5.898158550  | -2.535259485 | C | -5.818152905 | -0.207729071 | 0.590865672  |
| H  | 3.021930933  | 5.751853943  | -1.191994071 | H | -5.623687744 | -0.260307521 | 1.668065190  |
| H  | -0.810195565 | 5.505157471  | 0.770302057  | H | -6.903440952 | -0.141743109 | 0.450255156  |
| H  | 1.886700511  | 6.017491341  | -3.365071774 | H | -5.350066662 | 0.705006182  | 0.216808960  |
| H  | -1.936901212 | 5.791079521  | -1.406820536 | C | -1.137070537 | -2.062019587 | 2.694996595  |
| H  | -0.597998321 | 6.027789116  | -3.492367029 | H | -0.055869706 | -2.161062002 | 2.577107430  |
| Cl | 2.247034311  | 7.667582035  | 1.929703832  | C | -1.640802503 | -3.391514778 | 3.288846731  |
| O  | 2.856178284  | 3.269214392  | 6.794742107  | H | -2.721091986 | -3.362713337 | 3.467869282  |
| C  | 1.668441415  | 3.463155746  | 7.567356110  | H | -1.147405744 | -3.597205877 | 4.245818615  |
| H  | 0.870569408  | 3.917101145  | 6.964638233  | H | -1.436509967 | -4.221480846 | 2.605361223  |
| H  | 1.303967834  | 2.514048100  | 7.981330395  | C | -1.413918138 | -0.882059991 | 3.643923283  |
| H  | 1.933719158  | 4.137945175  | 8.384100914  | H | -1.063926220 | 0.060407832  | 3.210802794  |
| C  | 2.273813486  | 4.480583668  | 4.375090599  | H | -0.915750682 | -1.035478115 | 4.608321667  |
| H  | 1.276661873  | 4.811815739  | 4.064181328  | H | -2.486059904 | -0.770107508 | 3.835188866  |
| H  | 2.491156578  | 4.936180115  | 5.340550423  | C | -0.045869570 | 2.705678940  | 0.001750604  |
| H  | 3.030902147  | 4.909391403  | 3.694334507  | C | -0.004994185 | 3.621353626  | 1.056268573  |
| C  | 3.276962280  | 0.525200725  | 7.255945206  | H | -0.157741591 | 3.293798923  | 2.077375889  |
| H  | 4.126320362  | -0.161610559 | 7.181480885  | C | 0.202444121  | 4.980097294  | 0.798874199  |
| H  | 3.557903051  | 1.342994571  | 7.919738293  | H | 0.239239722  | 5.680390835  | 1.630301833  |
| H  | 2.458462715  | -0.035747007 | 7.725221157  | C | 0.342013776  | 5.440361500  | -0.510890543 |
| C  | 2.779127121  | -1.299715161 | 5.096379280  | C | 0.250467986  | 4.533229351  | -1.566860437 |
| H  | 3.794912577  | -1.561575174 | 5.410680294  | H | 0.329139411  | 4.879245758  | -2.594925404 |
| H  | 2.121744871  | -1.583147526 | 5.925192356  | C | 0.046805903  | 3.173748016  | -1.313944817 |
| H  | 2.518795013  | -1.920098662 | 4.242098331  | H | -0.046197657 | 2.493251801  | -2.153441906 |

=====  
L4\_0  
=====

|    |              |              |              |    |              |              |              |
|----|--------------|--------------|--------------|----|--------------|--------------|--------------|
| Pd | -0.427212536 | 0.747611523  | 0.287520796  | H  | 0.500337422  | 6.497410297  | -0.707345366 |
| P  | 1.830405593  | -0.036048681 | 0.507777929  | Cl | -2.665501595 | 1.533739448  | 0.229266509  |
| C  | 1.689000607  | -1.900144935 | 0.383405000  | H  | 1.384716630  | -5.786785126 | 0.022821222  |
| C  | 2.815584421  | -2.757064581 | 0.515483856  | H  | 3.572318792  | -4.774058819 | 0.433172464  |
| C  | 2.702902555  | -4.133236408 | 0.356568217  | O  | 3.999541044  | -2.165820122 | 0.852288246  |
| C  | 1.455880165  | -4.711371899 | 0.130473584  | O  | -0.941238225 | -4.407943249 | -0.067090221 |
| C  | 0.324513912  | -3.908244610 | 0.078596108  | C  | 5.190642834  | -2.935424566 | 0.834388137  |
| C  | 0.420414478  | -2.492475271 | 0.199953139  | H  | 5.174080849  | -3.727543354 | 1.593865633  |
| C  | -0.926439226 | -1.804862142 | 0.140684485  | H  | 5.365998268  | -3.382592440 | -0.152693182 |
| C  | -1.571671605 | -1.677778959 | -1.126238346 | H  | 6.000149250  | -2.239274263 | 1.061546683  |
| C  | -3.748502016 | -1.539189458 | -0.030570922 | C  | -1.104466915 | -5.798948765 | -0.288453609 |
| C  | -3.113958836 | -1.669638872 | 1.204340577  | H  | -0.583648801 | -6.128383160 | -1.197987914 |
| H  | -3.714212894 | -1.662058711 | 2.109094143  | H  | -0.751274884 | -6.393017292 | 0.565377295  |
| C  | -1.733804464 | -1.818024397 | 1.316916585  | H  | -2.177251339 | -5.953886032 | -0.413258076 |
| C  | -0.782027245 | -1.726562142 | -2.425661564 | C  | 4.315348148  | -0.175475791 | -1.137524486 |
| H  | 0.278126955  | -1.710342288 | -2.164813280 | H  | 4.816334248  | 0.285964608  | -1.998492360 |
| C  | -1.045176029 | -3.037515163 | -3.191573620 | H  | 4.975973129  | -0.078733750 | -0.277746826 |
| H  | -0.788305223 | -3.907808065 | -2.581820726 | H  | 4.188127041  | -1.236269474 | -1.361159205 |
| H  | -0.452775836 | -3.070761681 | -4.113377094 | C  | 3.226410151  | 2.053212643  | -0.790139258 |

H 3.692540407 2.423360825 -1.711654425  
H 2.314167500 2.624064207 -0.632696927  
H 3.916744232 2.270247936 0.026645070  
C 2.152269363 0.297957808 -2.237454891  
H 2.029412746 -0.771146476 -2.432437658  
H 1.166226864 0.756303847 -2.199910879  
H 2.693526268 0.728050709 -3.088922262  
C 2.051734686 1.699045300 2.699505806  
H 2.232955933 2.520391464 2.003069639  
H 0.971974432 1.606506228 2.834344864  
H 2.493341684 1.970712304 3.666829586  
C 4.201617241 0.535306275 2.218326807  
H 4.540603161 1.350934029 1.579290390  
H 4.512310028 0.783199728 3.241226196  
H 4.711330891 -0.378688484 1.927434921  
C 2.299448490 -0.725037694 3.232218742  
H 2.677247286 -0.430453449 4.219429493  
H 1.220605373 -0.844444811 3.323062181  
H 2.743224382 -1.689464569 2.978755713

H 0.245218143 -2.055989742 2.833004951  
C -1.231155515 -3.220525503 3.833251715  
H -2.278376341 -3.167485237 4.150703430  
H -0.616243005 -3.366978645 4.728916168  
H -1.120723605 -4.095378399 3.185732603  
C -0.947061896 -0.695643544 3.986922979  
H -0.656373382 0.209009349 3.443484068  
H -0.318341404 -0.789228141 4.880191326  
H -1.981397986 -0.556686103 4.319056988  
C -0.098766699 2.694089890 0.275538534  
C 0.036617547 3.520447969 1.396252632  
H -0.016669836 3.106869698 2.397841692  
C 0.215409115 4.900170803 1.235847473  
H 0.328053951 5.530599594 2.117048979  
C 0.234278515 5.467954636 -0.039689910  
C 0.047745239 4.648937225 -1.157058597  
H 0.028454311 5.080568314 -2.156498194  
C -0.130531117 3.270544767 -1.001345873  
H -0.305648386 2.658114910 -1.881590247  
C 2.934124470 0.315570503 2.041638136  
C 2.726789713 0.588509798 -1.129735112  
C -3.090520144 -1.676363349 -0.557113230  
H -3.687229156 -1.631039262 -1.463762760  
H 0.371277392 6.540377140 -0.161243364  
Cl -2.693580389 1.478511572 0.429442883  
H 1.388378620 -5.818932533 0.264682889  
H 3.597809315 -4.775473118 0.158071861  
O 4.058908939 -2.148537397 0.360331655  
O -0.929592609 -4.453611851 0.553920209  
C 5.237312794 -2.908860445 0.149344012  
H 5.380815983 -3.662178040 0.934724808  
H 5.227505684 -3.403338671 -0.830745161  
H 6.063041687 -2.195476294 0.182786867  
C -1.103300333 -5.860717773 0.530654609  
H -0.768720508 -6.295182705 -0.421449780  
H -0.570791066 -6.350696564 1.357351303  
H -2.175476789 -6.027989388 0.644185066  
C 4.026498318 -0.100724228 -1.587872982  
H 4.371172428 0.418197274 -2.492209673  
H 4.824928284 -0.044129942 -0.849385023  
H 3.865677357 -1.147788048 -1.849803329  
C 3.021438360 2.095006466 -0.954592168  
H 3.211012125 2.533373833 -1.942243338  
H 2.190768242 2.642596960 -0.516156912  
H 3.914577961 2.267435074 -0.350305706  
C 1.700594306 0.387429565 -2.264202595  
H 1.533370852 -0.675378680 -2.460370302  
H 0.738266826 0.846808970 -2.043484211  
H 2.089733601 0.836597323 -3.186197042  
C 2.382612944 1.615349412 2.655389309  
H 2.436288595 2.459147453 1.963997006  
H 1.340706706 1.498584628 2.960114717  
H 2.971127987 1.869302273 3.546444654  
C 4.441001892 0.507804036 1.784123182  
H 4.649682522 1.360538602 1.137438297  
H 4.922605991 0.716290832 2.748187542  
H 4.903758526 -0.381596267 1.365729570  
C 2.760263681 -0.818239272 3.068718433

=====  
L4\_10  
=====

Pd -0.440379083 0.716516256 0.473454744  
P 1.843483567 -0.053606410 0.476030558  
C 1.697985291 -1.914903998 0.313392520  
C 2.841062307 -2.759744883 0.274529248  
C 2.720659256 -4.143730640 0.219720826  
C 1.463844657 -4.738783360 0.295106947  
C 0.334299207 -3.943031549 0.430247426  
C 0.429497570 -2.523030281 0.438550800  
C -0.919832885 -1.851782441 0.524734139  
C -1.708821893 -1.806908488 -0.663428724  
C -3.739546537 -1.593520880 0.675688386  
C -2.960998535 -1.632126808 1.833934903  
H -3.447129726 -1.561099291 2.802431822  
C -1.577643156 -1.777648449 1.787785292  
C -1.080006838 -1.956988215 -2.041811228  
H 0.003463194 -1.900036573 -1.916072011  
C -1.400059581 -3.335898638 -2.651079655  
H -1.056680322 -4.144896507 -2.000431538  
H -0.917250216 -3.446830273 -3.629028320  
H -2.480090380 -3.455157757 -2.792308569  
C -1.501577377 -0.820675910 -2.991976500  
H -2.552511454 -0.912826121 -3.286313295  
H -0.898840666 -0.845983028 -3.907157898  
H -1.380962372 0.155811861 -2.515072107  
C -5.254395008 -1.504262090 0.750421226  
H -5.623550415 -1.371656179 -0.275058597  
C -5.843322277 -2.820870161 1.296266317  
H -5.537217617 -3.677497149 0.685812354  
H -6.938385487 -2.780735016 1.308450341  
H -5.502713203 -3.002712727 2.322420120  
C -5.731770039 -0.297108889 1.576815486  
H -5.446564674 -0.398598164 2.630325079  
H -6.824225426 -0.218152136 1.536560178  
H -5.289776802 0.628593028 1.201069236  
C -0.809579968 -1.939083576 3.090440512

H 3.301627398 -0.545020998 3.983077049  
H 1.715898156 -0.960465193 3.345415831  
H 3.163518906 -1.767372966 2.710924625

=====  
L4\_20  
=====

Pd -0.434337944 0.689761162 0.654966116  
P 1.857095122 -0.063300937 0.467807800  
C 1.696602464 -1.919419050 0.264150590  
C 2.833118677 -2.747302532 0.044050548  
C 2.741026640 -4.135087013 0.062598586  
C 1.541608691 -4.753225803 0.405915082  
C 0.438569307 -3.974473476 0.729359448  
C 0.500557840 -2.555582523 0.670700192  
C -0.849559546 -1.901228428 0.860489428  
C -1.726395607 -1.876601815 -0.266792119  
C -3.654201984 -1.650532126 1.217544317  
C -2.788089752 -1.662316442 2.313934803  
H -3.199170113 -1.571516275 3.315099716  
C -1.412434578 -1.807013392 2.165505886  
C -1.212895513 -2.052240133 -1.691092968  
H -0.126305729 -1.946576953 -1.668041468  
C -1.526598811 -3.467187881 -2.216281652  
H -1.091673017 -4.235139847 -1.569935918  
H -1.128386974 -3.600959301 -3.229020596  
H -2.609082460 -3.633822003 -2.253252029  
C -1.763709545 -0.974690914 -2.642908096  
H -2.830822945 -1.119293094 -2.842687130  
H -1.240648031 -1.015480399 -3.605292320  
H -1.642542124 0.024594694 -2.216413498  
C -5.159117222 -1.563179851 1.406775475  
H -5.607344627 -1.461325526 0.409667492  
C -5.698062897 -2.864175081 2.035351992  
H -5.436486721 -3.738179684 1.428803682  
H -6.789098263 -2.825727224 2.131550550  
H -5.278128624 -3.014348745 3.036943674  
C -5.577046871 -0.334581614 2.233885288  
H -5.203888893 -0.402411848 3.262320280  
H -6.669819832 -0.264553010 2.282905579  
H -5.176896095 0.582462311 1.795522094  
C -0.542012691 -1.929771185 3.405801058  
H 0.482807040 -2.095125914 3.064791918  
C -0.931023300 -3.154559135 4.253953934  
H -1.941042662 -3.049588442 4.664522648  
H -0.239400893 -3.273964643 5.096054077  
H -0.905681729 -4.064464092 3.647683382  
C -0.566664398 -0.636038363 4.239066601  
H -0.295622438 0.227856204 3.624173641  
H 0.130623594 -0.702563107 5.082629204  
H -1.566845536 -0.446170539 4.642463207  
C -0.126397341 2.678398371 0.541972935  
C 0.146311164 3.424465418 1.693382740  
H 0.205377802 2.942764997 2.663814068  
C 0.324380308 4.811673641 1.608317018  
H 0.547392964 5.378395557 2.511760950  
C 0.204978138 5.465927124 0.380327821  
C -0.121062480 4.726577759 -0.761160553

H -0.250320971 5.226742744 -1.719860792  
C -0.299371511 3.341904879 -0.680632710  
H -0.584721446 2.791921139 -1.573223710  
C 3.116924524 0.235097468 1.914756417  
C 2.547950506 0.673295379 -1.193968058  
C -3.099049568 -1.757207274 -0.057351008  
H -3.762226820 -1.731022596 -0.917199910  
H 0.343214363 6.543403149 0.316459090  
Cl -2.698227167 1.414608002 0.719135225  
H 1.490955949 -5.835111618 0.426110446  
H 3.607592344 -4.750442505 -0.144182682  
O 4.030928135 -2.115811586 -0.119013540  
O -0.771082461 -4.501616955 1.091783762  
C 5.169969559 -2.862235308 -0.514791369  
H 5.476694584 -3.576592207 0.260362655  
H 4.992886066 -3.400638580 -1.454944134  
H 5.966986179 -2.131344557 -0.664332151  
C -0.920373380 -5.911628723 1.117094755  
H -0.753785253 -6.353949547 0.125210792  
H -0.240154728 -6.381585121 1.840554476  
H -1.951690555 -6.094244957 1.422897100  
C 3.794483185 0.042074405 -1.845243335  
H 4.034132481 0.638046145 -2.735914469  
H 4.669566631 0.049990814 -1.197211623  
H 3.612201929 -0.982480884 -2.172354460  
C 2.849480867 2.172272205 -0.964892089  
H 2.934689522 2.664775848 -1.941333652  
H 2.067702770 2.687673566 -0.412901133  
H 3.799560070 2.321926594 -0.447304398  
C 1.399478674 0.521608531 -2.214197397  
H 1.205981612 -0.531350613 -2.438884258  
H 0.468713552 0.969506025 -1.867521405  
H 1.685816407 1.012825251 -3.152314186  
C 2.651936054 1.516069412 2.631991863  
H 2.636406898 2.385206699 1.970669866  
H 1.650049329 1.393826008 3.047514200  
H 3.338401556 1.732959390 3.460519791  
C 4.589091301 0.418106377 1.496911049  
H 4.735929966 1.268467069 0.831084788  
H 5.174504280 0.617005050 2.403649092  
H 4.991744518 -0.474870384 1.025334716  
C 3.044510603 -0.934911549 2.912874699  
H 3.701051712 -0.709359288 3.762492180  
H 2.038258553 -1.069842100 3.309417009  
H 3.377439499 -1.877963543 2.473928928

=====  
L4\_30  
=====

Pd -0.412742376 0.653985739 0.786735356  
P 1.873071313 -0.078888930 0.417518705  
C 1.699178219 -1.936320305 0.213893175  
C 2.797910690 -2.744653702 -0.193638250  
C 2.773613214 -4.130766392 -0.068612143  
C 1.704981923 -4.760556698 0.563169420  
C 0.655992270 -3.996148825 1.057506323  
C 0.643981099 -2.584614754 0.898573577  
C -0.706497490 -1.967440009 1.196872354

C -1.678005219 -2.004506111 0.150384143
C -3.475235224 -1.746085048 1.790084124
C -2.513845921 -1.683842659 2.803422451
H -2.836750984 -1.548868775 3.831753492
C -1.154999375 -1.821014643 2.540274143
C -1.300798893 -2.225627899 -1.311278582
H -0.223527282 -2.076944828 -1.408512354
C -1.602191448 -3.676876307 -1.734488726
H -1.068660021 -4.392869473 -1.101613522
H -1.302000403 -3.846976519 -2.775115013
H -2.674204588 -3.888206005 -1.652188420
C -1.991765141 -1.219128609 -2.250000954
H -3.066610098 -1.411900997 -2.332180500
H -1.567663908 -1.290977716 -3.258133650
H -1.871474147 -0.195555076 -1.886135459
C -4.958104134 -1.661622882 2.110749483
H -5.500905514 -1.698180437 1.157210827
C -5.406201839 -2.873112917 2.952247858
H -5.172684193 -3.817373991 2.448389530
H -6.486284733 -2.838733435 3.134778976
H -4.904067993 -2.880774975 3.926518202
C -5.322206020 -0.338159204 2.808692455
H -4.823865891 -0.255799651 3.781414509
H -6.403307915 -0.282016337 2.979987383
H -5.007102966 0.517357230 2.206897497
C -0.175732195 -1.868730545 3.701859236
H 0.810198665 -2.080546618 3.280283689
C -0.495267212 -3.013667345 4.679968834
H -1.457353354 -2.855674267 5.179397583
H 0.274795651 -3.078175068 5.457608223
H -0.538631320 -3.968855381 4.150506496
C -0.103518963 -0.513652802 4.427237988
H 0.117833659 0.291975796 3.720968008
H 0.670035541 -0.526639283 5.203959465
H -1.059391737 -0.272834748 4.905010223
C -0.113019466 2.640508413 0.832012415
C 0.227435440 3.250376701 2.042948723
H 0.344184279 2.661764860 2.946755648
C 0.406950742 4.638265133 2.105642796
H 0.683011115 5.099221230 3.052531719
C 0.226701781 5.424798012 0.967113912
C -0.161069185 4.818660736 -0.231237367
H -0.335237801 5.423630714 -1.118944883
C -0.344476432 3.434753418 -0.298264951
H -0.674031973 2.985877991 -1.229917049
C 3.320298672 0.184984505 1.682475805
C 2.338424921 0.726508141 -1.297970891
C -3.031838894 -1.906139016 0.479929388
H -3.768609285 -1.932875514 -0.316962838
H 0.367208242 6.501969814 1.017124534
Cl -2.692842484 1.320967197 0.769483209
H 1.709376812 -5.839374542 0.660702229
H 3.604532719 -4.731495380 -0.416904688
O 3.904135466 -2.095403194 -0.653339028
O -0.438577443 -4.535588264 1.675124168
C 4.952364445 -2.833558559 -1.259522557
H 5.468434334 -3.475773573 -0.533971429
H 4.584069252 -3.448097229 -2.091131449

H 5.653394222 -2.090415955 -1.644172072
C -0.530614316 -5.946332932 1.790701151
H -0.537849367 -6.432815075 0.805722952
H 0.289631188 -6.361991405 2.391791344
H -1.478526354 -6.140801430 2.294669867
C 3.494434118 0.155612856 -2.143520117
H 3.616246939 0.816523075 -3.012177229
H 4.445212841 0.128155068 -1.613238454
H 3.274344444 -0.844354510 -2.517733097
C 2.652571201 2.218923807 -1.042232633
H 2.568226099 2.763443232 -1.990725756
H 1.965189219 2.690795660 -0.345056206
H 3.672864914 2.361358404 -0.678409576
C 1.067795038 0.595689535 -2.166456461
H 0.839569211 -0.452623218 -2.380043030
H 0.189300194 1.041052699 -1.698531032
H 1.236962438 1.100230932 -3.125954390
C 2.994674921 1.477367401 2.455034018
H 2.896786451 2.347709894 1.803087234
H 2.067526102 1.376439691 3.019826889
H 3.803824425 1.680584788 3.168133974
C 4.723128319 0.319766343 1.059369206
H 4.799711227 1.164677978 0.374668360
H 5.438825130 0.499120444 1.871851921
H 5.023342133 -0.586556017 0.537229657
C 3.353899956 -0.981090307 2.687388182
H 4.122379303 -0.768840432 3.440970898
H 2.405646086 -1.092338681 3.212994337
H 3.603466272 -1.934212923 2.215299368

L4\_40

Pd -0.401138395 0.588874936 0.897822678
P 1.859228849 -0.090132430 0.339066625
C 1.697050214 -1.955757856 0.166217089
C 2.729553938 -2.733288050 -0.433688849
C 2.861264706 -4.098119736 -0.189814106
C 2.025484324 -4.736171722 0.720315993
C 1.031364560 -4.006886005 1.360310197
C 0.866195798 -2.619260788 1.106619120
C -0.480591625 -2.079260349 1.542503238
C -1.541152120 -2.127102375 0.584674835
C -3.181729317 -1.814182401 2.375752687
C -2.131847858 -1.762712121 3.299375057
H -2.362004519 -1.613806009 4.350473881
C -0.803543568 -1.921122313 2.919807911
C -1.323019505 -2.424045563 -0.899291396
H -0.282156616 -2.205424070 -1.143281341
C -1.552483678 -3.923692942 -1.178262711
H -0.891872704 -4.548028946 -0.568753660
H -1.365984559 -4.153983593 -2.233807325
H -2.586911678 -4.202721596 -0.946591854
C -2.196340084 -1.552440524 -1.819421291
H -3.251591682 -1.842081666 -1.776648283
H -1.871000528 -1.667300463 -2.859498739
H -2.134900331 -0.497178048 -1.540647626
C -4.627253532 -1.673585773 2.823012352

H -5.250967503 -1.698995590 1.919952750  
C -5.047903061 -2.855103493 3.718430042  
H -4.903365135 -3.813333988 3.207533836  
H -6.104105473 -2.771257401 3.999284267  
H -4.458782196 -2.877006292 4.642652512  
C -4.875522614 -0.326334506 3.526327610  
H -4.313552856 -0.264727652 4.465861320  
H -5.938683033 -0.211644471 3.768183231  
H -4.559265137 0.504501939 2.890782595  
C 0.274077505 -1.951304674 3.993933201  
H 1.207860470 -2.256219387 3.512854338  
C -0.018753584 -2.984751701 5.095877171  
H -0.906928658 -2.715113401 5.677046299  
H 0.824881732 -3.046028614 5.792813301  
H -0.183565572 -3.973532438 4.661370277  
C 0.485031962 -0.549068630 4.592369556  
H 0.715487838 0.170856059 3.803009510  
H 1.305276990 -0.547942162 5.320003510  
H -0.422147632 -0.201097384 5.098529339  
C -0.092404209 2.533015490 1.262999892  
C 0.236559972 2.908536911 2.567822695  
H 0.350591987 2.165064812 3.349233389  
C 0.403060883 4.261822224 2.885460138  
H 0.668819487 4.542030811 3.902563095  
C 0.223182589 5.242404938 1.909666538  
C -0.146902025 4.864298820 0.617176652  
H -0.317206591 5.620861530 -0.145587787  
C -0.317834973 3.515553236 0.294129223  
H -0.633142710 3.239822388 -0.706504464  
C 3.446344376 0.168443874 1.418646693  
C 2.091178179 0.781856954 -1.401865244  
C -2.861258984 -2.006720781 1.037945509  
H -3.667632580 -2.036153555 0.313033283  
H 0.352560699 6.292749405 2.157837868  
Cl -2.695288181 1.225311041 0.787617862  
H 2.150788546 -5.796806812 0.900068521  
H 3.643432379 -4.671118736 -0.671587408  
O 3.619959831 -2.073702335 -1.224500299  
O 0.126200870 -4.569283485 2.216389656  
C 4.585525990 -2.800200939 -1.966312528  
H 5.316132545 -3.292181730 -1.311190724  
H 4.116709709 -3.551616192 -2.614247561  
H 5.097512722 -2.061243534 -2.584818602  
C 0.181159288 -5.968110085 2.444812298  
H 0.034319151 -6.535399437 1.515636683  
H 1.131211400 -6.270637512 2.905879736  
H -0.636211753 -6.187997341 3.133386850  
C 3.137874365 0.284893721 -2.421130419  
H 3.160798073 1.017160892 -3.239184618  
H 4.144940376 0.215172485 -2.012970924  
H 2.867672443 -0.679962516 -2.848263025  
C 2.412802458 2.266886234 -1.118847370  
H 2.239373922 2.842704535 -2.036573410  
H 1.786433220 2.704205036 -0.345363468  
H 3.460890532 2.409687281 -0.843399167  
C 0.720644116 0.669316471 -2.106659889  
H 0.458991796 -0.374692619 -2.303640842  
H -0.092567004 1.114156485 -1.528390288

H 0.774393380 1.185187101 -3.073718071  
C 3.267127275 1.497393489 2.179134607  
H 3.131474495 2.353780031 1.516526699  
H 2.409622908 1.462064147 2.850594997  
H 4.163724899 1.680965781 2.785039902  
C 4.762746811 0.219359666 0.620796084  
H 4.790482998 1.049144387 -0.086555943  
H 5.586826324 0.371281356 1.329447389  
H 4.945755482 -0.707406759 0.079005048  
C 3.555314541 -0.966013670 2.453690767  
H 4.402520180 -0.751752138 3.116428614  
H 2.662786007 -1.035569549 3.074195385  
H 3.731571436 -1.940454841 1.991438866

=====  
L4\_50  
=====

Pd -0.391723543 0.552801609 1.001120329  
P 1.849310637 -0.092922091 0.302664638  
C 1.694794655 -1.963177562 0.142352208  
C 2.535770655 -2.703304052 -0.734834015  
C 2.743908644 -4.069855690 -0.574576497  
C 2.153630257 -4.739902496 0.488979250  
C 1.333715320 -4.045202732 1.371630788  
C 1.117542028 -2.641912937 1.252871752  
C -0.057818808 -2.143493176 2.061918974  
C -1.305629015 -2.048681974 1.363769293  
C -2.419186831 -1.378379583 3.438160896  
C -1.215846062 -1.582764983 4.114778042  
H -1.190816641 -1.423398018 5.188935757  
C -0.042313498 -1.992423296 3.474401712  
C -1.484332085 -2.530741930 -0.085792780  
H -0.531736195 -2.428748369 -0.607358575  
C -1.850284219 -4.030695438 -0.077587485  
H -1.111495256 -4.622133255 0.467529029  
H -1.920495272 -4.416899204 -1.101224542  
H -2.821038485 -4.178613186 0.409686595  
C -2.524981499 -1.746209025 -0.904654682  
H -3.546436548 -1.935679078 -0.557722390  
H -2.475766897 -2.063235998 -1.952502728  
H -2.367854834 -0.665345371 -0.856468737  
C -3.644114971 -0.833679080 4.152086258  
H -4.460174561 -0.801632404 3.419018269  
C -4.090033054 -1.735885262 5.315996647  
H -4.287973881 -2.757813692 4.975186825  
H -5.004101276 -1.345220089 5.777010918  
H -3.323523760 -1.786687136 6.098033905  
C -3.386676073 0.611108720 4.622143269  
H -2.579324484 0.640763879 5.363767147  
H -4.285945415 1.030854583 5.087746620  
H -3.099441528 1.242690682 3.777078629  
C 1.145392537 -2.369452477 4.366412640  
H 1.985443711 -2.647327185 3.722310781  
C 0.789975226 -3.599000216 5.234399796  
H 0.041554742 -3.32833290 5.988947392  
H 1.679102898 -3.962868690 5.762906075  
H 0.385145873 -4.408908844 4.631476879  
C 1.610351682 -1.247639179 5.316823483



H 1.877063990 -0.330068469 4.796723843  
H 2.486631632 -1.578601003 5.885694027  
H 0.828591108 -0.999223769 6.042591572  
C 0.208838478 2.088937044 2.110471964  
C 0.458614230 1.769364357 3.448449373  
H 0.326064974 0.754032075 3.800051689  
C 0.852428436 2.772071838 4.339924812  
H 1.050353765 2.514633179 5.377957344  
C 0.982663870 4.090925217 3.901627541  
C 0.692339897 4.405417919 2.573087692  
H 0.762616217 5.434841156 2.229427338  
C 0.294162691 3.409994364 1.672782779  
H 0.033531532 3.677443743 0.656504452  
C 3.517414808 0.241175413 1.154428601  
C 1.829210401 0.728834450 -1.470323324  
C -2.450002909 -1.668167353 2.077239275  
H -3.384930134 -1.547170758 1.543051124  
H 1.291710854 4.870213032 4.593061924  
Cl -2.589091778 1.475885272 0.966649950  
H 2.310793161 -5.806031704 0.591367662  
H 3.374558210 -4.622457504 -1.258698344  
O 3.145569563 -2.011369944 -1.741698742  
O 0.626462877 -4.680552959 2.353620291  
C 4.064007282 -2.685435057 -2.588537693  
H 4.897672176 -3.114812851 -2.018115044  
H 3.574396849 -3.476138830 -3.170539618  
H 4.448978424 -1.928282976 -3.273774385  
C 0.704922438 -6.093782902 2.452531815  
H 0.364033133 -6.581511021 1.529583335  
H 1.722605348 -6.432353497 2.688364983  
H 0.038980350 -6.371782303 3.270969152  
C 3.169066191 0.888825476 -2.215400934  
H 2.954831839 1.284512758 -3.216078281  
H 3.824537992 1.612519026 -1.725058675  
H 3.708287954 -0.042911410 -2.334273338  
C 1.248456836 2.154877901 -1.320944905  
H 1.268201828 2.643289089 -2.302994967  
H 0.213332504 2.130637407 -0.972878933  
H 1.824589372 2.772821665 -0.629598498  
C 0.833666325 -0.081458315 -2.329216957  
H 1.206754088 -1.077119946 -2.568789482  
H -0.140278995 -0.177741602 -1.837714911  
H 0.663553596 0.454834074 -3.270993948  
C 3.377127886 -0.243895143 2.601282120  
H 2.579192400 0.296890318 3.107917309  
H 3.168431759 -1.313972950 2.650857449  
H 4.312586784 -0.056527168 3.142501116  
C 3.745255709 1.768671036 1.184910059  
H 2.899919987 2.297409058 1.632852077  
H 4.631375313 1.973299265 1.798290372  
H 3.932259083 2.187031031 0.194488361  
C 4.710575581 -0.477858067 0.501054049  
H 5.613442421 -0.2441014197 1.077944636  
H 4.582243919 -1.563760996 0.520122170  
H 4.880951881 -0.168494344 -0.529222488

=====  
Pd -0.438691765 0.573915899 0.800063550  
P 1.849310637 -0.092922069 0.302664667  
C 1.694794655 -1.963177681 0.142352149  
C 2.510502100 -2.690293550 -0.771704614  
C 2.792522669 -4.042469025 -0.594013989  
C 2.313616753 -4.714498520 0.521669030  
C 1.515848517 -4.036930561 1.438299656  
C 1.220687509 -2.653921127 1.293547869  
C 0.038174588 -2.187114239 2.117155313  
C -1.214807272 -2.127777815 1.424524188  
C -2.322614431 -1.375693917 3.471973896  
C -1.123657823 -1.573830366 4.154168606  
H -1.096576929 -1.384723306 5.223184109  
C 0.051332656 -1.999884367 3.523082733  
C -1.402127743 -2.683509827 0.001861799  
H -0.474534422 -2.545232534 -0.554903686  
C -1.670519233 -4.201810360 0.091361955  
H -0.884372234 -4.720128059 0.644014835  
H -1.740319490 -4.641351223 -0.910595298  
H -2.618533134 -4.384601593 0.610606849  
C -2.514183283 -2.012702227 -0.823288381  
H -3.511629343 -2.254896879 -0.440750539  
H -2.468593359 -2.379537344 -1.854940176  
H -2.431553602 -0.922886789 -0.836009026  
C -3.539996386 -0.779962122 4.157336712  
H -4.376393795 -0.845699906 3.449566603  
C -3.940163612 -1.546065807 5.429535866  
H -4.115666866 -2.606486797 5.218688488  
H -4.857120991 -1.125444770 5.856875896  
H -3.162121773 -1.481598973 6.198857784  
C -3.294364452 0.713859200 4.449065685  
H -2.459089756 0.839371920 5.148604870  
H -4.183856010 1.171060205 4.898160934  
H -3.049561977 1.250387788 3.528028488  
C 1.236895680 -2.331536770 4.435431957  
H 2.090840816 -2.603877306 3.809195042  
C 0.896798253 -3.556773901 5.315069199  
H 0.120800078 -3.301120520 6.044715881  
H 1.782625675 -3.884558678 5.872070789  
H 0.532167792 -4.388669491 4.715822697  
C 1.653021336 -1.187353015 5.386340618  
H 1.852116108 -0.245937094 4.876652718  
H 2.559478521 -1.469790816 5.933677673  
H 0.874397397 -0.995845675 6.132499695  
C 0.079031795 2.034278154 2.038080454  
C 0.290676594 1.656841278 3.365927935  
H 0.162053645 0.625975311 3.667168856  
C 0.654348612 2.623174667 4.308917522  
H 0.825608611 2.322087049 5.340029716  
C 0.791923165 3.959864855 3.931036949  
C 0.539750576 4.330229282 2.608913183  
H 0.618451953 5.373114586 2.310589552  
C 0.173825637 3.372321367 1.655819774  
H -0.049801651 3.679840088 0.641793966  
C 3.493507147 0.221734151 1.205848932  
C 1.911339283 0.765545607 -1.455588579  
C -2.355141878 -1.712642670 2.121076345

H -3.289995193 -1.606713533 1.583761215  
H 1.078415990 4.709742546 4.663490295  
Cl -2.654068232 1.408388019 0.630900681  
H 2.534267426 -5.767849445 0.638220906  
H 3.409085751 -4.578083992 -1.304370284  
O 3.037688255 -2.000931263 -1.824725389  
O 0.901921034 -4.676369190 2.478508949  
C 3.726890087 -2.701985598 -2.849050045  
H 4.658775806 -3.149444342 -2.479666948  
H 3.099316359 -3.483650684 -3.295221329  
H 3.965425968 -1.955569506 -3.608752728  
C 1.062168002 -6.080226898 2.610259533  
H 0.693510711 -6.612418652 1.723252296  
H 2.108818531 -6.358198166 2.792418480  
H 0.462453663 -6.369015694 3.474853039  
C 3.286273241 0.893457592 -2.140550852  
H 3.127427340 1.270168185 -3.158950567  
H 3.920497179 1.623627424 -1.628791451  
H 3.823878288 -0.045496505 -2.210615873  
C 1.376838446 2.212149382 -1.296138048  
H 1.486502886 2.727827787 -2.258488178  
H 0.318540901 2.220340967 -1.026230812  
H 1.919043660 2.790456057 -0.546073914  
C 0.910200357 0.019685909 -2.368235111  
H 1.241843462 -0.985550284 -2.623347282  
H -0.083992928 -0.044434428 -1.910755992  
H 0.792901695 0.589185596 -3.298696518  
C 3.313846111 -0.313391387 2.629256248  
H 2.422223091 0.111697845 3.085570097  
H 3.229612827 -1.401671648 2.641184568  
H 4.180034637 -0.035101429 3.241318464  
C 3.712351561 1.747597575 1.274805307  
H 2.862469912 2.261019945 1.732723832  
H 4.596628666 1.941890240 1.894088149  
H 3.901016474 2.185901642 0.292781830  
C 4.705836296 -0.479646981 0.566553116  
H 5.571566582 -0.337196469 1.225693464  
H 4.543202877 -1.556593299 0.469978333  
H 4.963369846 -0.080526710 -0.412891537

=====  
L4\_70  
=====

Pd -0.467924267 0.593860745 0.595555961  
P 1.849310637 -0.092922047 0.302664667  
C 1.694794655 -1.963177681 0.142352119  
C 2.478647232 -2.685449123 -0.808454573  
C 2.807931900 -4.028476238 -0.633881748  
C 2.438008547 -4.698633671 0.522177577  
C 1.686003685 -4.029371262 1.481614709  
C 1.327049851 -2.665409327 1.325056791  
C 0.136280388 -2.223715782 2.164926767  
C -1.117649674 -2.189453840 1.470627785  
C -2.226722002 -1.328434825 3.473506212  
C -1.037987351 -1.526446342 4.172050476  
H -1.014457464 -1.302339077 5.234192848  
C 0.137163788 -1.990941644 3.564041615  
C -1.315834403 -2.834557772 0.088561192

H -0.400166661 -2.724183321 -0.492654741  
C -1.560618043 -4.347441196 0.288403809  
H -0.761381567 -4.813990116 0.869519353  
H -1.632112622 -4.858479023 -0.678940415  
H -2.500788212 -4.507529259 0.829010010  
C -2.450098991 -2.235063791 -0.759577692  
H -3.438165903 -2.460441589 -0.343641937  
H -2.418246984 -2.670144081 -1.764834166  
H -2.381564856 -1.147503257 -0.849459648  
C -3.442448139 -0.679610848 4.113277435  
H -4.285760880 -0.825081408 3.425582886  
C -3.822840214 -1.314299822 5.461002350  
H -3.978972912 -2.394147158 5.364560604  
H -4.746265888 -0.867638469 5.845660686  
H -3.044930220 -1.153519034 6.216207504  
C -3.214174747 0.839787006 4.244956017  
H -2.367708445 1.049062371 4.909588337  
H -4.102898121 1.328513026 4.661377907  
H -2.994371891 1.284011960 3.269651651  
C 1.294654250 -2.327443123 4.508059502  
H 2.159788609 -2.621929646 3.908761024  
C 0.908691049 -3.539547205 5.387553215  
H 0.127886042 -3.261043310 6.103558540  
H 1.776362181 -3.889305353 5.959710121  
H 0.529954016 -4.362884045 4.784420490  
C 1.705120087 -1.175085783 5.449568748  
H 1.892578483 -0.237559050 4.927928925  
H 2.614263058 -1.444958329 5.998628139  
H 0.925966382 -0.982766449 6.194694519  
C -0.029316125 2.041438103 1.881743789  
C 0.186004281 1.665487647 3.209114552  
H 0.116348691 0.627149045 3.501857996  
C 0.479205847 2.643244267 4.165214539  
H 0.650602818 2.343223810 5.196661949  
C 0.549017906 3.988257408 3.799627781  
C 0.303478420 4.354432106 2.475149155  
H 0.332058370 5.401973248 2.184536695  
C 0.004890494 3.385686874 1.509802818  
H -0.216777444 3.688731194 0.493927568  
C 3.466645002 0.224945992 1.260270596  
C 1.988072991 0.773842454 -1.461035013  
C -2.254123688 -1.724027514 2.137894869  
H -3.185386181 -1.633407235 1.590970635  
H 0.780072510 4.746934891 4.542481422  
Cl -2.679021120 1.382884860 0.298066765  
H 2.703102827 -5.741875648 0.637941539  
H 3.390106440 -4.554351330 -1.379463792  
O 2.929825068 -2.008779764 -1.901889682  
O 1.178325176 -4.663757801 2.579715252  
C 3.569652557 -2.709621668 -2.957714558  
H 4.529103279 -3.138089418 -2.640106201  
H 2.930164337 -3.505822897 -3.359045267  
H 3.750238895 -1.966128707 -3.736006737  
C 1.413442135 -6.054758549 -2.734013319  
H 1.000173330 -6.628638744 1.893929124  
H 2.483319521 -6.279924870 2.836648703  
H 0.900142312 -6.344270229 3.652168036  
C 3.378293276 0.833733976 -2.128904581

H 3.250921965 1.212243557 -3.151176691  
H 4.039552212 1.537027955 -1.615900993  
H 3.875777245 -0.127883300 -2.187692404  
C 1.526428461 2.247887850 -1.302381516  
H 1.704696178 2.765095234 -2.253700972  
H 0.459072918 2.307272434 -1.083331108  
H 2.058395863 2.794383287 -0.523107946  
C 0.953412831 0.103290558 -2.396953583  
H 1.205041766 -0.925773263 -2.642534018  
H -0.054161433 0.125408396 -1.963821292  
H 0.903184593 0.678849220 -3.329995632  
C 3.244455338 -0.243978873 2.698432922  
H 2.391891479 0.269519717 3.139189482  
H 3.076402664 -1.319117188 2.749585390  
H 4.131496906 -0.013988267 3.301388979  
C 3.722489119 1.746793151 1.298971295  
H 2.859390497 2.291455746 1.693720698  
H 4.570552349 1.934744596 1.968852282  
H 3.982324362 2.158644199 0.323088795  
C 4.671488762 -0.529355943 0.671233237  
H 5.541697502 -0.347898602 1.314572215  
H 4.495913029 -1.608934879 0.651823938  
H 4.928646564 -0.202911645 -0.335614175

=====  
L4\_80  
=====

Pd -0.429580033 0.704726934 0.654401183  
P 1.764586449 -0.079472460 0.094246358  
C 1.779710531 -1.985819221 0.164796278  
C 2.255231857 -2.754529715 -0.941131473  
C 2.812819719 -4.025301933 -0.792506635  
C 2.926993370 -4.603655815 0.459741771  
C 2.416908979 -3.926362038 1.564081430  
C 1.897349834 -2.611769915 1.456911206  
C 1.024320245 -2.152378082 2.625599861  
C -0.390197545 -2.145215988 2.391335011  
C -0.798933864 -1.356848121 4.675467968  
C 0.564246356 -1.488966346 4.927224159  
H 0.934220135 -1.269634962 5.924197197  
C 1.483466864 -1.901171565 3.949933529  
C -1.036232233 -2.740611315 1.128362417  
H -0.444249541 -2.454611778 0.257033229  
C -1.002331972 -4.282678604 1.224262953  
H 0.012441237 -4.665790558 1.347682357  
H -1.430488944 -4.732165337 0.320612371  
H -1.594807386 -4.616621971 2.084071398  
C -2.481878042 -2.290150404 0.855289817  
H -3.185654879 -2.729350090 1.572025061  
H -2.783531904 -2.637227297 -0.139376163  
H -2.604601383 -1.204186678 0.883213937  
C -1.768121600 -0.847963393 5.730509758  
H -2.777776241 -0.924624801 5.305582047  
C -1.734139681 -1.704228163 7.009395123  
H -1.934337974 -2.758006811 6.787085056  
H -2.486250401 -1.355667472 7.725979805  
H -0.756959140 -1.645768523 7.503046513  
C -1.507794976 0.637134969 6.048093319

H -0.512307525 0.769850433 6.488727570  
H -2.244783878 1.014664650 6.766250610  
H -1.555929303 1.251381993 5.144280434  
C 2.914747715 -2.122481585 4.454385281  
H 3.551017761 -2.390633821 3.606500149  
C 2.960042477 -3.295814276 5.458602905  
H 2.408240318 -3.044631243 6.370680332  
H 3.996387959 -3.510556459 5.745143414  
H 2.518098116 -4.198258400 5.041998863  
C 3.515755892 -0.882499099 5.157836914  
H 3.338428020 0.045154259 4.615515232  
H 4.596711636 -1.006452918 5.287571907  
H 3.085832119 -0.757751048 6.157598019  
C 0.221587092 2.046523094 1.955317616  
C 0.626808345 1.619335175 3.218363523  
H 0.587018967 0.573237181 3.485895634  
C 1.097988009 2.559336185 4.141881943  
H 1.415068388 2.221071243 5.125856876  
C 1.155339360 3.912592173 3.805605173  
C 0.728151262 4.327421665 2.542428255  
H 0.752990961 5.381875038 2.277091742  
C 0.254518092 3.398393393 1.608156085  
H -0.102473289 3.735948563 0.641736984  
C 3.533600092 0.424254596 0.628834486  
C 1.504948139 0.614695549 -1.751084805  
C -1.250201702 -1.724094272 3.409240246  
H -2.315164566 -1.680814028 3.213465452  
H 1.522850633 4.640586853 4.524076462  
Cl -2.636363268 1.528059840 0.589691043  
H 3.352569342 -5.594833374 0.551909149  
H 3.180835009 -4.564197063 -1.655904174  
O 2.161111116 -2.209558249 -2.186009884  
O 2.321338892 -4.520464897 2.789500237  
C 2.384851694 -3.005343437 -3.339248419  
H 3.438718796 -3.298634529 -3.436494112  
H 1.754651308 -3.904111147 -3.336908817  
H 2.112377405 -2.372503996 -4.186332226  
C 2.618373156 -5.903555870 2.901642084  
H 2.009370327 -6.503132820 2.212474108  
H 3.681557178 -6.111588955 2.721833229  
H 2.374530792 -6.179459572 3.928702593  
C 2.703136683 0.531094313 -2.723040342  
H 3.468745470 1.270181298 -2.470814705  
H 3.167537212 -0.448227763 -2.769271374  
H 2.347107887 0.783343017 -3.730385303  
C 1.143489957 2.127656937 -1.668615937  
H 1.001262903 2.486074686 -2.696817160  
H 0.210644811 2.300609589 -1.127256393  
H 1.919477940 2.742767572 -1.213549852  
C 0.240186140 -0.072354883 -2.332567453  
H 0.310250551 -1.157445550 -2.366611004  
H -0.662766933 0.203938648 -1.767390013  
H 0.080555312 0.295103729 -3.35548859  
C 3.738839865 1.934700847 0.398897320  
H 3.828766108 2.194448471 -0.656679749  
H 2.936616182 2.526317835 0.849779367  
H 4.678939342 2.225751638 0.883537233  
C 4.616742134 -0.395071417 -0.098235354

H 4.636869431 -0.217697263 -1.173464656  
H 5.595547199 -0.103449121 0.303440630  
H 4.495636463 -1.468069673 0.075721681  
C 3.656330824 0.167176485 2.129782438  
H 4.644822121 0.494717568 2.475254297  
H 2.899880171 0.717064083 2.690108061  
H 3.565112591 -0.892112851 2.350468874

=====  
L4\_90  
=====

Pd -0.384458333 0.934493721 0.663241267  
P 1.681161404 -0.015505070 0.048308752  
C 1.823790073 -1.922003627 0.286303073  
C 0.977554619 -2.667642355 -0.566889524  
C 0.775581539 -4.029806137 -0.362672329  
C 1.352549076 -4.664193153 0.729817271  
C 2.108042717 -3.932517529 1.643234491  
C 2.296314478 -2.529664993 1.509917498  
C 3.212216139 -1.961123228 2.548867226  
C 2.725335598 -1.684499741 3.850638628  
C 5.021711826 -1.297085166 4.607714176  
C 5.478053093 -1.594822049 3.322604418  
H 6.545411110 -1.568698764 3.121672153  
C 4.603320122 -1.949428082 2.290661573  
C 1.224347234 -1.673237920 4.167186737  
H 0.711526811 -1.373496056 3.246515274  
C 0.677621722 -3.056861639 4.578279495  
H 0.727493763 -3.778290033 3.764933348  
H -0.369823933 -2.965409994 4.887639046  
H 1.248550653 -3.458223820 5.423367977  
C 0.831644654 -0.656907380 5.258239746  
H 1.125796914 -1.007667422 6.254426956  
H -0.255997270 -0.531168938 5.266902447  
H 1.281337500 0.326492280 5.103261948  
C 5.987629414 -0.891218245 5.711360455  
H 5.396410942 -0.739387453 6.624330521  
C 7.022128105 -1.992861152 6.004695415  
H 6.530987263 -2.937088490 6.260528564  
H 7.668999672 -1.704311848 6.840842724  
H 7.664600849 -2.174992800 5.135725021  
C 6.680668354 0.443434387 5.376824379  
H 7.298522949 0.348904073 4.476400375  
H 7.332502365 0.761298478 6.198493481  
H 5.945790768 1.234520435 5.195081711  
C 5.177429676 -2.422289371 0.953868091  
H 4.365152359 -2.433310032 0.222615689  
C 5.684041977 -3.873041630 1.099359512  
H 6.529524803 -3.914979458 1.796633363  
H 6.020924568 -4.265860558 0.132994950  
H 4.897607803 -4.523918152 1.489565134  
C 6.288439751 -1.521777511 0.384871811  
H 5.948235035 -0.492060184 0.244393200  
H 6.613552570 -1.904365182 -0.589114547  
H 7.171539783 -1.496956468 1.033029318  
C -1.590525985 -0.616703928 0.432385713  
C -2.651288509 -0.499184579 -0.471697718  
H -2.777338982 0.404147089 -1.058854103

C -3.577374220 -1.541988611 -0.581442475  
H -4.405023575 -1.446796417 -1.280786872  
C -3.451954842 -2.692120552 0.204405606  
C -2.393442154 -2.791428804 1.109195471  
H -2.282033682 -3.677507639 1.729516506  
C -1.457645178 -1.756840944 1.225362539  
H -0.631733060 -1.862649441 1.918933988  
C 2.593166351 1.300774574 1.202618480  
C 2.370371819 0.261902303 -1.790794492  
C 3.647644758 -1.362002134 4.850516319  
H 3.288443327 -1.128360629 5.848281384  
H -4.179844856 -3.494780302 0.120790571  
Cl -2.092852354 2.337325573 1.493666887  
H 1.200495005 -5.728478432 0.859806836  
H 0.141947776 -4.597250938 -1.032217503  
O 0.364900678 -1.975007176 -1.565249562  
O 2.735080004 -4.514416695 2.716023207  
C -0.594584167 -2.631722450 -2.386029720  
H -0.127250135 -3.419984341 -2.990705013  
H -1.407264113 -3.042573929 -1.781651378  
H -0.996930420 -1.859526753 -3.042279720  
C 2.529922247 -5.895964622 2.961682796  
H 1.470062852 -6.124552250 3.139601469  
H 2.899175882 -6.517596245 2.134503365  
H 3.101193666 -6.124446869 3.863120317  
C 2.930014849 -1.045025110 -2.401609421  
H 3.725638390 -1.469398260 -1.782078624  
H 2.170966387 -1.801948190 -2.567814112  
H 3.370977879 -0.801960647 -3.376064301  
C 3.542244434 1.263254404 -1.935169458  
H 3.707379580 1.416525483 -3.008961916  
H 3.369485855 2.247156620 -1.504413843  
H 4.471005440 0.857989848 -1.526779294  
C 1.178667068 0.788373411 -2.616537333  
H 0.313048214 0.131178513 -2.537408829  
H 0.871327102 1.784310460 -2.280995131  
H 1.468657017 0.862622678 -3.672896147  
C 1.987952113 2.640708208 0.678915381  
H 2.004302502 2.779649258 -0.400448859  
H 0.947915673 2.789040327 1.016462922  
H 2.554785013 3.466877460 1.126878738  
C 4.128095150 1.354289889 1.229992747  
H 4.583180428 1.627073526 0.281489581  
H 4.427140236 2.115756989 1.963234663  
H 4.542415619 0.406603962 1.570553660  
C 2.127735376 1.203209519 2.668204784  
H 2.276577473 2.183215618 3.138793230  
H 1.066017151 0.958423674 2.766242981  
H 2.716268301 0.481233746 3.220345736

=====  
L4\_100  
=====

Pd -0.437092364 0.884201169 0.495913893  
P 1.686523438 -0.013713063 0.027644740  
C 1.831616163 -1.921177626 0.265205055  
C 0.979303956 -2.680986881 -0.565646291  
C 0.818741322 -4.048462868 -0.359517068



H 0.653008401 -1.862275362 6.106363297  
H -0.615205288 -1.324454904 5.008285046  
H 0.880460262 -0.393362761 5.146032333  
C 5.529044151 -1.850618362 6.337318897  
H 4.806063652 -1.809295416 7.162931442  
C 6.485399246 -3.024403811 6.614691257  
H 5.943440914 -3.974785566 6.650053024  
H 7.000813007 -2.886744976 7.571874619  
H 7.250662327 -3.104967356 5.834469795  
C 6.289364338 -0.510928333 6.315440178  
H 7.038849354 -0.499157965 5.515822411  
H 6.810037136 -0.341911167 7.264872074  
H 5.606068611 0.327151120 6.143791199  
C 5.439317703 -2.557037592 1.318763256  
H 4.742088318 -2.392353773 0.491152614  
C 5.924908638 -4.018860817 1.232677460  
H 6.651228428 -4.225313187 2.027673483  
H 6.413284779 -4.209101200 0.269888043  
H 5.093299389 -4.716432095 1.350699306  
C 6.625121593 -1.597216010 1.112302899  
H 6.321255684 -0.549430490 1.171060324  
H 7.071713448 -1.766163111 0.126001149  
H 7.414619446 -1.757500172 1.854509711  
C -1.041065216 1.577827811 1.569357038  
C -1.114104986 2.920706272 1.188777447  
H -0.802900374 3.230147600 0.195057049  
C -1.593651175 3.874421835 2.094880342  
H -1.642592311 4.918478379 1.795252562  
C -2.010396242 3.491704941 3.370655298  
C -1.963240504 2.143664837 3.733490467  
H -2.302528143 1.831285238 4.718400478  
C -1.491279364 1.183241844 2.833832741  
H -1.478543878 0.135873660 3.119335890  
C 2.744239330 1.240823269 1.783629894  
C 2.853369713 0.635980606 -1.318656802  
C 3.343199730 -2.092066050 5.072987080  
H 2.836938858 -1.989914179 6.028302670  
H -2.381305218 4.234744072 4.071254730  
Cl -2.684969902 -0.327503204 -0.180398911  
H 1.445898890 -5.593877316 -0.037358541  
H 0.368660837 -3.981634855 -1.551499844  
O 0.476243377 -1.335391760 -1.292527199  
O 2.840736866 -4.863690853 2.170809984  
C -0.419053048 -1.775776267 -2.326086760  
H 0.138243169 -2.317009687 -3.098976135  
H -1.219684958 -2.387867689 -1.904344559  
H -0.857263386 -0.865604401 -2.731692076  
C 2.610565901 -6.261375427 2.084488153  
H 1.538666844 -6.498050690 2.122261047  
H 3.042814970 -6.689238548 1.169862509  
H 3.106635809 -6.697301388 2.953006983  
C 4.220541000 1.326611280 -1.126893282  
H 4.175665379 2.254524708 -0.560500145  
H 4.945489883 0.659182072 -0.653173387  
H 4.613175392 1.580531478 -2.119324446  
C 1.897047997 1.576593757 -2.079284430  
H 2.349787951 1.866060495 -3.036299229  
H 0.942404628 1.085679173 -2.285516024

H 1.685640097 2.491267681 -1.517841220  
C 3.163158178 -0.596984327 -2.199001074  
H 3.762885809 -1.341752052 -1.668530464  
H 2.271210909 -1.079292297 -2.589120626  
H 3.750167131 -0.255046785 -3.059654713  
C 2.015425444 0.926133215 3.099720240  
H 0.935173512 0.874715328 2.988324881  
H 2.384053946 0.000484009 3.528247595  
H 2.231304169 1.728853226 3.816349030  
C 2.405944109 2.707272768 1.415324330  
H 1.328857899 2.873913527 1.382685900  
H 2.816328049 3.351338148 2.202547789  
H 2.837926626 3.041713953 0.471131057  
C 4.250749588 1.089798570 2.059870243  
H 4.485526562 1.666815758 2.963445902  
H 4.514217377 0.055414006 2.268596888  
H 4.887697697 1.469642043 1.264442563

=====  
L4\_120  
=====

Pd -0.405848593 0.205623880 0.077073775  
P 1.942101717 0.189552128 0.373763800  
C 2.093496799 -1.732079744 0.430295438  
C 1.265309215 -2.285625458 -0.600466192  
C 1.135753512 -3.646836281 -0.808812201  
C 1.754943013 -4.543077946 0.060372114  
C 2.437743902 -4.047624111 1.160811067  
C 2.564674854 -2.648747206 1.399356961  
C 3.315358162 -2.308649778 2.653506041  
C 2.616436958 -2.248978138 3.882935286  
C 4.744367123 -1.942613840 5.054002285  
C 5.411367893 -2.029708385 3.829288244  
H 6.494206905 -1.945988297 3.811075449  
C 4.725770950 -2.217067957 2.625884295  
C 1.090136886 -2.387454033 3.949490309  
H 0.685395718 -2.025638342 2.996353149  
C 0.665091991 -3.861885548 4.112713814  
H 1.020478368 -4.482293129 3.291832447  
H -0.427120149 -3.938192129 4.157429218  
H 1.073602796 -4.271256447 5.043986797  
C 0.431621492 -1.562488675 5.072849274  
H 0.635664940 -1.993004084 6.059937000  
H -0.655513585 -1.566885948 4.939232826  
H 0.762829602 -0.522105873 5.084823132  
C 5.506559372 -1.696569324 6.347887516  
H 4.772804260 -1.696809888 7.165080547  
C 6.525483131 -2.813777924 6.636598110  
H 6.038637161 -3.793734789 6.666501999  
H 7.021437168 -2.646790028 7.599385738  
H 7.302814007 -2.850193501 5.864892960  
C 6.189046860 -0.315386593 6.334005833  
H 6.945755005 -0.260395139 5.542947769  
H 6.688198566 -0.117110960 7.289319992  
H 5.460813522 0.482300282 6.154136181  
C 5.511296749 -2.362794876 1.321618557  
H 4.811476707 -2.209640503 0.493245959  
C 6.077305794 -3.792484760 1.192255020

H 6.805136204 -3.985533237 1.989529967  
H 6.586217403 -3.921594143 0.229544893  
H 5.284899712 -4.538749695 1.275693655  
C 6.644956112 -1.334187150 1.157261252  
H 6.291484356 -0.307192504 1.280590534  
H 7.086818218 -1.424572468 0.157969549  
H 7.451131821 -1.497786283 1.881359696  
C -1.124500394 1.581871629 1.305983067  
C -1.202171683 2.918481112 0.900331259  
H -0.837210536 3.219154596 -0.078666851  
C -1.756382108 3.876494169 1.759319425  
H -1.808447003 4.915442944 1.439122677  
C -2.243598461 3.504600525 3.014399767  
C -2.190770864 2.162817955 3.401949644  
H -2.583895922 1.858420134 4.370136261  
C -1.643672705 1.198273420 2.548586369  
H -1.627084613 0.155270502 2.853963614  
C 2.614588737 1.250935793 1.839118004  
C 2.949760437 0.652797639 -1.256638765  
C 3.353295803 -2.061186790 5.057204247  
H 2.829922199 -1.992334127 6.006475449  
H -2.672975779 4.250719547 3.678709269  
Cl -2.630959511 -0.297926426 -0.577684760  
H 1.660659552 -5.607015610 -0.115751117  
H 0.528333485 -4.027957439 -1.619007945  
O 0.550585687 -1.376788497 -1.366120219  
C 3.038399935 -4.853191376 2.092913628  
C -0.267736197 -1.843309641 -2.450795889  
H 0.351977378 -2.370880604 -3.184679747  
H -1.075540900 -2.477332115 -2.077679396  
H -0.706088781 -0.946558535 -2.884849310  
C 2.889912844 -6.259469509 1.970040441  
H 1.834068418 -6.559926510 2.008589745  
H 3.338918924 -6.635650158 1.040803552  
H 3.418071985 -6.688695908 2.822902441  
C 4.295147896 1.355229139 -0.977402806  
H 4.201649189 2.283305168 -0.415868878  
H 4.993488789 0.695513070 -0.455994904  
H 4.750581741 1.612796187 -1.941723466  
C 2.036240339 1.590772033 -2.073223352  
H 2.551359892 1.894604564 -2.993757725  
H 1.104080319 1.091310859 -2.350810051  
H 1.775118232 2.497360706 -1.519403815  
C 3.314624071 -0.576677680 -2.119966507  
H 3.897202253 -1.315743327 -1.562549591  
H 2.445041895 -1.068570375 -2.548435211  
H 3.935836077 -0.228950694 -2.953941584  
C 1.803996563 0.894579649 3.095332861  
H 0.736749887 0.805317342 2.906053782  
H 2.176805496 -0.023691177 3.536442280  
H 1.938202739 1.693973422 3.835399151  
C 2.261476040 2.708688974 1.450944185  
H 1.186328888 2.850049973 1.340549946  
H 2.599573135 3.359441757 2.266948462  
H 2.753641129 3.055840015 0.540368617  
C 4.101849079 1.159469843 2.222849131  
H 4.242974281 1.732102990 3.148433685  
H 4.400018215 0.136284485 2.434776306

H 4.774497986 1.583870888 1.481234431

=====  
L4\_130  
=====

Pd -0.874475241 0.881179094 -0.509830236  
P 1.479994416 0.743229806 -0.292079628  
C 1.574223042 -1.166858196 -0.091402367  
C 0.638286412 -1.798999190 -0.972663343  
C 0.511751413 -3.173870087 -1.072009802  
C 1.257088423 -4.003221512 -0.238664657  
C 2.076624632 -3.428501368 0.720196247  
C 2.213734865 -2.015755415 0.846492231  
C 3.105383635 -1.613238096 1.984912395  
C 2.557411194 -1.505471349 3.285481930  
C 4.808022022 -1.165036201 4.185575962  
C 5.327222347 -1.315124869 2.897006750  
H 6.400456429 -1.240822315 2.750662327  
C 4.504439354 -1.537218690 1.790627480  
C 1.056758285 -1.674250484 3.555167913  
H 0.519444585 -1.384815812 2.644410610  
C 0.704795599 -3.145538807 3.859799147  
H 0.956681073 -3.805307627 3.031502485  
H -0.366830021 -3.242557764 4.066530228  
H 1.254641533 -3.489808798 4.743191242  
C 0.525816917 -0.799199820 4.708570004  
H 0.860807061 -1.173683167 5.682378292  
H -0.568788469 -0.825050831 4.713517666  
H 0.837576628 0.244372904 4.626862526  
C 5.717958927 -0.868685007 5.368505478  
H 5.086303234 -0.831754863 6.266103745  
C 6.765433311 -1.976033211 5.581789970  
H 6.287082195 -2.952214718 5.709988594  
H 7.370684624 -1.770295739 6.471735954  
H 7.447052479 -2.047485352 4.726750851  
C 6.391874790 0.508373678 5.215142250  
H 7.048343182 0.527218401 4.337698460  
H 7.001246452 0.744832098 6.094769955  
H 5.646171570 1.300233126 5.090028763  
C 5.125092030 -1.688913107 0.402109206  
H 4.349216938 -1.447378278 -0.332742602  
C 5.571840286 -3.142240524 0.145563647  
H 6.346113205 -3.429592133 0.866037607  
H 5.990961075 -3.244230509 -0.862198591  
H 4.741875648 -3.841216087 0.253090829  
C 6.307490349 -0.734387338 0.155770048  
H 6.062866211 0.296290100 0.423240423  
H 6.593183041 -0.756866395 -0.901556849  
H 7.190913200 -1.027740002 0.733121455  
C -1.379916787 2.564624548 0.402245998  
C -1.858961344 2.549140930 1.716002464  
H -1.942529082 1.612999558 2.260221720  
C -2.248728514 3.744019032 2.330006838  
H -2.614335060 3.723731995 3.354127169  
C -2.182520390 4.952785015 1.634537697  
C -1.736539483 4.959159851 0.311547637  
H -1.697372556 5.891903877 -0.246466354  
C -1.341572642 3.768957853 -0.308903605

|    |              |              |              |   |              |              |              |
|----|--------------|--------------|--------------|---|--------------|--------------|--------------|
| H  | -1.003537893 | 3.787188053  | -1.341033816 | C | 6.204743385  | -1.787906647 | 2.802228689  |
| C  | 2.276268959  | 1.865885139  | 1.063648224  | H | 7.237219810  | -1.709895968 | 2.476552248  |
| C  | 2.389479876  | 1.070180655  | -1.997761846 | C | 5.208021164  | -2.017586231 | 1.851677418  |
| C  | 3.427114487  | -1.265596509 | 4.355132580  | C | 2.128421068  | -2.229406357 | 4.195794582  |
| H  | 3.019036293  | -1.153776765 | 5.355474949  | H | 1.419667482  | -1.989463210 | 3.394763708  |
| H  | -2.488591194 | 5.878513336  | 2.114115238  | C | 1.902484655  | -3.706456423 | 4.584462643  |
| Cl | -3.164393425 | 0.558375657  | -1.052554131 | H | 2.016287327  | -4.375620365 | 3.733303547  |
| H  | 1.157878995  | -5.077232838 | -0.329629481 | H | 0.895915091  | -3.838072300 | 4.997020721  |
| H  | -0.183826581 | -3.615459681 | -1.772823572 | H | 2.626171112  | -4.009336948 | 5.349651337  |
| O  | -0.174756944 | -0.965276241 | -1.719378471 | C | 1.783926725  | -1.349068761 | 5.414677143  |
| O  | 2.812144279  | -4.166020870 | 1.611334801  | H | 2.287218094  | -1.707411766 | 6.319374561  |
| C  | -1.070675492 | -1.521826744 | -2.695093155 | H | 0.707147479  | -1.390756607 | 5.608211040  |
| H  | -0.499873936 | -2.081570387 | -3.444414377 | H | 2.062917233  | -0.302908957 | 5.271350861  |
| H  | -1.819983602 | -2.155252934 | -2.213900566 | C | 7.009059429  | -1.337601304 | 5.172060013  |
| H  | -1.577155113 | -0.667853057 | -3.139910460 | H | 6.534194469  | -1.277163744 | 6.160420418  |
| C  | 2.701485395  | -5.580278873 | 1.577938437  | C | 8.059080124  | -2.461910486 | 5.228134155  |
| H  | 1.672913432  | -5.911863804 | 1.774279833  | H | 7.593005180  | -3.426479340 | 5.453039646  |
| H  | 3.035332203  | -5.991456032 | 0.615655184  | H | 8.808655739  | -2.254359245 | 5.999915123  |
| H  | 3.355042934  | -5.946832180 | 2.370941162  | H | 8.585428238  | -2.559858084 | 4.271959305  |
| C  | 2.463736057  | -0.190530345 | -2.885439157 | C | 7.670674801  | 0.024351142  | 4.888360023  |
| H  | 2.992079020  | -1.013294220 | -2.395975351 | H | 8.178262711  | 0.019186050  | 3.917042255  |
| H  | 1.480857253  | -0.539539874 | -3.194076777 | H | 8.417160988  | 0.262376875  | 5.654541492  |
| H  | 3.022062778  | 0.066945881  | -3.793319941 | H | 6.926896095  | 0.827588022  | 4.870937347  |
| C  | 3.842029333  | 1.556760192  | -1.829711199 | C | 5.596138000  | -2.172593117 | 0.381923378  |
| H  | 4.278622627  | 1.694173694  | -2.826851845 | H | 4.714794159  | -1.922887564 | -0.219126701 |
| H  | 3.918113947  | 2.514768362  | -1.316745400 | C | 5.984149456  | -3.627622604 | 0.048823766  |
| H  | 4.458414078  | 0.825189888  | -1.302439332 | H | 6.848984718  | -3.933332682 | 0.648912251  |
| C  | 1.563160896  | 2.143351316  | -2.738559484 | H | 6.255762100  | -3.718755245 | -1.009277701 |
| H  | 0.548825145  | 1.789229512  | -2.944972992 | H | 5.169750214  | -4.319873333 | 0.261936277  |
| H  | 1.480834365  | 3.073224306  | -2.170564175 | C | 6.740374088  | -1.233383894 | -0.043392956 |
| H  | 2.047660351  | 2.376236916  | -3.695366859 | H | 6.576910973  | -0.206052989 | 0.293152541  |
| C  | 2.018738985  | 3.318902016  | 0.598103881  | H | 6.838266373  | -1.227587700 | -1.134288907 |
| H  | 2.605459452  | 3.595336914  | -0.280499458 | H | 7.702120304  | -1.564919591 | 0.362519294  |
| H  | 0.967374563  | 3.515708208  | 0.395909041  | C | -0.873693883 | 2.233587503  | 0.993229449  |
| H  | 2.327570438  | 3.986207008  | 1.411758780  | C | -1.282298565 | 2.375853300  | 2.323187113  |
| C  | 3.768829346  | 1.721659422  | 1.408743739  | H | -1.393856049 | 1.502790928  | 2.959128618  |
| H  | 4.432538033  | 2.005986929  | 0.595204115  | C | -1.569696426 | 3.646185398  | 2.833803177  |
| H  | 3.981451750  | 2.399342775  | 2.245448828  | H | -1.881232381 | 3.746925592  | 3.870937824  |
| H  | 4.019812107  | 0.719204724  | 1.737727642  | C | -1.471974134 | 4.776244164  | 2.019874334  |
| C  | 1.476912737  | 1.617766738  | 2.352262259  | C | -1.100092173 | 4.626837730  | 0.682623148  |
| H  | 1.753394365  | 2.380325794  | 3.091314077  | H | -1.038445592 | 5.496966839  | 0.032970604  |
| H  | 0.400808960  | 1.679273605  | 2.201873064  | C | -0.807540357 | 3.360136032  | 0.165360168  |
| H  | 1.734100103  | 0.650470078  | 2.770195007  | H | -0.525704026 | 3.260124922  | -0.878417730 |

=====  
L4\_140  
=====

|    |              |              |              |    |              |              |              |
|----|--------------|--------------|--------------|----|--------------|--------------|--------------|
| Pd | -0.508978546 | 0.441141695  | 0.229407147  | H  | 4.351541042  | -1.649807215 | 5.617788315  |
| P  | 1.849118233  | 0.238138944  | 0.291042417  | H  | -1.697867513 | 5.761092186  | 2.419475794  |
| C  | 1.952894211  | -1.666367173 | 0.525554538  | Cl | -2.852706671 | 0.175493032  | -0.066579692 |
| C  | 0.904696167  | -2.320403814 | -0.198662296 | H  | 1.550047636  | -5.586639881 | 0.391171545  |
| C  | 0.773456812  | -3.698199749 | -0.252286136 | H  | -0.024079848 | -4.154451847 | -0.822591126 |
| C  | 1.659160614  | -4.511024952 | 0.446085602  | O  | -0.004082641 | -1.516225934 | -0.859484255 |
| C  | 2.642197132  | -3.920171261 | 1.223306775  | O  | 3.539379597  | -4.646501064 | 1.962678075  |
| C  | 2.786410570  | -2.505197763 | 1.311222315  | C  | -1.003096938 | -2.107433081 | -1.707478285 |
| C  | 3.861169338  | -2.099847794 | 2.279625893  | H  | -0.516862869 | -2.693059206 | -2.495453358 |
| C  | 3.546077013  | -2.007746935 | 3.656844616  | H  | -1.689917088 | -2.724800110 | -1.123037457 |
| C  | 5.912949085  | -1.637031317 | 4.160279274  | H  | -1.561169028 | -1.270648718 | -2.121559620 |
|    |              |              |              | C  | 3.454185486  | -6.062621593 | 1.936883807  |



H 2.489997387 -6.419426918 2.323451281  
H 3.606091499 -6.460394382 0.924335301  
H 4.255153179 -6.418415070 2.586632252  
C 4.092621326 0.955064178 -1.452950239  
H 4.275239468 1.889912248 -0.922917366  
H 4.715461254 0.176030159 -1.013081312  
H 4.432182789 1.100169420 -2.486287117  
C 1.781805515 1.690907836 -2.122801065  
H 2.185269356 1.903736591 -3.120702982  
H 0.731359780 1.406099558 -2.231932640  
H 1.818546176 2.616691828 -1.544849038  
C 2.492540598 -0.693068206 -2.376367807  
H 3.035075188 -1.550179005 -1.967586398  
H 1.456556916 -0.983463705 -2.544286728  
H 2.934262514 -0.454804122 -3.351266146  
C 2.543597698 2.806593418 1.123240948  
H 3.181619644 3.075419188 0.278113574  
H 1.508475065 3.032062531 0.873085320  
H 2.825367451 3.459084272 1.958435655  
C 4.249814034 1.141735077 1.870625496  
H 4.870762825 1.129997134 0.977462769  
H 4.584178925 1.988718629 2.483214378  
H 4.438891888 0.239186361 2.438574553  
C 1.978584290 1.136540771 2.899254322  
H 2.473538399 1.706997633 3.695186138  
H 0.948266685 1.481230617 2.828787804  
H 1.981794238 0.090197049 3.191272259

=====  
L4\_150  
=====

Pd -0.540170550 0.456699073 0.365998924  
P 1.803635597 0.186062396 0.287349641  
C 1.920765400 -1.717706561 0.540116251  
C 0.820007443 -2.386092186 -0.086844489  
C 0.792545021 -3.761043072 -0.278614253  
C 1.814222813 -4.557385445 0.218850091  
C 2.832383633 -3.964094639 0.949676096  
C 2.908489227 -2.554187775 1.133700609  
C 3.987994432 -2.173851490 2.119290829  
C 3.633046865 -2.087335110 3.492090940  
C 5.978788376 -1.696380377 4.074747086  
C 6.315816402 -1.876079082 2.733106375  
H 7.360289097 -1.819760919 2.439748764  
C 5.354792118 -2.130911350 1.750474691  
C 2.204692841 -2.348612785 3.989980936  
H 1.507913947 -2.059150457 3.196935177  
C 2.001346827 -3.854096413 4.265046597  
H 2.190038919 -4.459117413 3.378828049  
H 0.976019502 -4.043911934 4.601672649  
H 2.686297178 -4.189474583 5.052201271  
C 1.816248894 -1.561015844 5.256687164  
H 2.328905582 -1.946117759 6.145244598  
H 0.741202652 -1.665497899 5.435702324  
H 2.041032791 -0.494874626 5.176288605  
C 7.035772800 -1.366525769 5.117871761  
H 6.526763439 -1.294071078 6.088269711  
C 8.097570419 -2.475312233 5.230952740

H 7.636381149 -3.441369295 5.459700108  
H 8.817849159 -2.242646217 6.022989750  
H 8.657490730 -2.585336685 4.295489788  
C 7.688892841 -0.001230794 4.829982281  
H 8.225257874 -0.017268322 3.874340057  
H 8.408571243 0.259883374 5.614165783  
H 6.936125755 0.791945398 4.776362419  
C 5.838630676 -2.386058807 0.324106842  
H 4.962504864 -2.407665730 -0.327617824  
C 6.535790443 -3.757587433 0.212466821  
H 7.430531025 -3.786384106 0.844642282  
H 6.849332809 -3.942675114 -0.821542680  
H 5.872622967 -4.562933445 0.527815759  
C 6.798277378 -1.295407653 -0.192738995  
H 6.410451412 -0.287078589 -0.036733076  
H 6.979362965 -1.429366708 -1.264752388  
H 7.770039558 -1.353248000 0.309551626  
C -0.732083023 2.310802221 1.016446710  
C -0.920051575 2.573684216 2.376492023  
H -0.976062953 1.759144545 3.092180967  
C -1.044432998 3.894943714 2.817713499  
H -1.183184743 4.095157623 3.877669573  
C -0.998773098 4.951251030 1.906717658  
C -0.846081913 4.681843758 0.544856846  
H -0.826687098 5.498660564 -0.173087090  
C -0.719676256 3.364188671 0.095052458  
H -0.609011829 3.165680170 -0.967211127  
C 2.870091677 1.287509084 1.454457760  
C 2.417150736 0.351676702 -1.544111371  
C 4.636748791 -1.826707602 4.430777073  
H 4.367898941 -1.724857688 5.477904320  
H -1.093758583 5.976794243 2.253535271  
Cl -2.917435408 0.356927633 0.229241684  
H 1.772212148 -5.629005909 0.071533218  
H -0.036129102 -4.229027748 -0.791491330  
O -0.253483385 -1.625445127 -0.500441790  
O 3.805066109 -4.694589615 1.579997063  
C -1.296097517 -2.220963717 -1.290173292  
H -0.874203265 -2.641014576 -2.209748745  
H -1.818833828 -2.991533041 -0.716225982  
H -1.992068648 -1.412438393 -1.504521847  
C 3.729494572 -6.111347198 1.539289594  
H 2.792665720 -6.478857994 1.978892565  
H 3.824974775 -6.497094631 0.515530467  
H 4.570982456 -6.468302727 2.135162592  
C 3.728304863 -0.405882657 -1.795814395  
H 4.539211273 -0.064797595 -1.154627681  
H 3.597375870 -1.480125546 -1.645339966  
H 4.040922165 -0.252269238 -2.836504459  
C 2.599454880 1.842637420 -1.887205243  
H 2.751133442 1.937537193 -2.969104528  
H 1.720393181 2.436766863 -1.619875669  
H 3.477080345 2.273622036 -1.402063131  
C 1.350935221 -0.214095533 -2.506487608  
H 1.235322356 -1.294418573 -2.403178692  
H 0.375435412 0.258245289 -2.364341736  
H 1.681140065 -0.019160124 -3.534092665  
C 2.531872034 2.781927586 1.232392073

H 2.867921829 3.171526670 0.274052620  
H 1.474092722 2.993185997 1.343387961  
H 3.066314459 3.341630220 2.009682178  
C 4.391604900 1.134313226 1.320469379  
H 4.750825405 1.500923753 0.354656130  
H 4.871965885 1.745842099 2.094503880  
H 4.726751804 0.112077206 1.462281466  
C 2.413802862 0.940355718 2.879976988  
H 2.864804745 1.652347684 3.581893206  
H 1.328489661 1.011717081 2.985456944  
H 2.743680477 -0.050791398 3.164702654

=====  
L4\_160  
=====

Pd -0.564444065 0.482196897 0.506166697  
P 1.761914968 0.140435472 0.305149645  
C 1.898774147 -1.761617184 0.568500042  
C 0.727048337 -2.428868771 0.085828304  
C 0.690295458 -3.801589727 -0.135865614  
C 1.788565993 -4.592716217 0.161410004  
C 2.907529593 -4.002751350 0.730870605  
C 2.993667603 -2.600043774 0.941603720  
C 4.180407524 -2.225808620 1.799298882  
C 3.980116606 -2.155808210 3.205345869  
C 6.365506649 -1.708461285 3.524727106  
C 6.554821491 -1.883851647 2.154070377  
H 7.559588432 -1.808643460 1.748344660  
C 5.497342110 -2.159599066 1.282254457  
C 2.628407001 -2.471401453 3.861146927  
H 1.833714128 -2.208062649 3.157127857  
C 2.523073435 -3.985944986 4.143035889  
H 2.645755291 -4.578366280 3.236527681  
H 1.547862291 -4.224412918 4.582314014  
H 3.300404310 -4.292616367 4.851933002  
C 2.356714964 -1.705972552 5.170187950  
H 2.987779856 -2.067125082 5.989668369  
H 1.316450834 -1.861092448 5.474218845  
H 2.520358324 -0.630255580 5.070782661  
C 7.524090290 -1.351526141 4.443423748  
H 7.128098488 -1.303573847 5.466597557  
C 8.628197670 -2.424022198 4.421095848  
H 8.228152275 -3.408292055 4.684152126  
H 9.424394608 -2.175242901 5.131620407  
H 9.083429337 -2.503236532 3.427433729  
C 8.094667435 0.037323486 4.098020077  
H 8.514052391 0.047017682 3.085500479  
H 8.893898964 0.314952940 4.794416904  
H 7.316476345 0.806177318 4.143302917  
C 5.832159519 -2.415293932 -0.186591655  
H 4.892527103 -2.462110758 -0.740557969  
C 6.552524567 -3.767262936 -0.369649440  
H 7.505604267 -3.772071362 0.171313867  
H 6.768082142 -3.942031622 -1.430160880  
H 5.946131706 -4.591039181 0.004966174  
C 6.697883606 -1.301111221 -0.810144663  
H 6.300825596 -0.302920163 -0.615838230  
H 6.763113499 -1.436984420 -1.894995093

H 7.720343590 -1.328463316 -0.418771684  
C -0.658461690 2.360038042 1.108049035  
C -0.718367338 2.648810148 2.475186348  
H -0.719099939 1.847737670 3.208302259  
C -0.781315148 3.979512930 2.901209354  
H -0.820647717 4.200812817 3.965322018  
C -0.797945440 5.019071579 1.969774008  
C -0.771774828 4.724019051 0.605076611  
H -0.803372085 5.527940273 -0.126806334  
C -0.710999429 3.396654129 0.170362845  
H -0.706188381 3.177356243 -0.893258572  
C 2.937213421 1.245223761 1.352602363  
C 2.187816620 0.272285610 -1.581019640  
C 5.075747490 -1.873618126 4.028033733  
H 4.924636364 -1.786054969 5.099536419  
H -0.843401372 6.051812172 2.304766655  
Cl -2.949815989 0.509976387 0.442509711  
H 1.735910296 -5.660036087 -0.011507482  
H -0.198611066 -4.271328926 -0.531418324  
O -0.402997851 -1.681324720 -0.177915007  
O 3.975370646 -4.734980106 1.176507473  
C -1.536635756 -2.301857233 -0.811835408  
H -1.241829753 -2.720476866 -1.780236244  
H -1.954310775 -3.080541611 -0.166773155  
H -2.270449162 -1.506801963 -0.929882288  
C 3.906863213 -6.151682377 1.115709662  
H 3.057015181 -6.539326668 1.693169832  
H 3.838652372 -6.515365601 0.081956297  
H 4.837168217 -6.510292530 1.558896422  
C 3.467108011 -0.484672129 -1.957865596  
H 4.338338375 -0.130157366 -1.409831405  
H 3.356849432 -1.556831479 -1.780004263  
H 3.669027090 -0.344310552 -3.027505398  
C 2.327380419 1.758431315 -1.962410331  
H 2.369107962 1.838348746 -3.055517435  
H 1.476758599 2.352537394 -1.616072655  
H 3.247061729 2.199185610 -1.572804093  
C 1.025787830 -0.314166039 -2.411900043  
H 0.907617331 -1.388054371 -2.254624844  
H 0.073976018 0.178056329 -2.194925070  
H 1.255978107 -0.163678199 -3.473736525  
C 2.588216305 2.740961075 1.160103679  
H 2.797755241 3.115484476 0.160465300  
H 1.557009459 2.966658115 1.406966448  
H 3.227486849 3.302116632 1.852770329  
C 4.436470985 1.089784026 1.063587666  
H 4.695455551 1.470201731 0.071219556  
H 4.995944977 1.689152598 1.792562604  
H 4.780861378 0.066458717 1.154895544  
C 2.619127750 0.898144603 2.816359997  
H 3.145312786 1.601975083 3.472825766  
H 1.549037933 0.983014405 3.025470257  
H 2.959810495 -0.099891879 3.066888332

=====  
L4\_170  
=====

Pd -0.567266822 0.499776423 0.759631753

P 1.720909119 0.090577088 0.348370969  
 C 1.876497149 -1.811977267 0.607294500  
 C 0.613688171 -2.469328642 0.480277240  
 C 0.480156600 -3.852546692 0.519487441  
 C 1.594714642 -4.663353920 0.654949069  
 C 2.847253799 -4.074487686 0.745768666  
 C 3.028779030 -2.662183046 0.692417324  
 C 4.477397919 -2.300488949 0.900561988  
 C 4.962479115 -2.239012957 2.231793642  
 C 7.237758636 -1.924811006 1.396194935  
 C 6.747546196 -2.050013542 0.095244728  
 H 7.447205544 -1.988389850 -0.731719613  
 C 5.394427776 -2.273274183 -0.178976640  
 C 4.047079086 -2.373170614 3.449718475  
 H 3.023324728 -2.158466816 3.128294945  
 C 4.062514305 -3.810825109 4.008511066  
 H 3.726097107 -4.535322666 3.266817093  
 H 3.412829876 -3.885160923 4.887926579  
 H 5.078226089 -4.088562965 4.312803268  
 C 4.406185627 -1.386194229 4.578313828  
 H 5.313571453 -1.696067214 5.107747555  
 H 3.598620176 -1.348341227 5.317098141  
 H 4.569695473 -0.375094593 4.199378967  
 C 8.709798813 -1.650053144 1.663278699  
 H 8.846505165 -1.633979678 2.752857208  
 C 9.616326332 -2.757726908 1.097313285  
 H 9.337888718 -3.738158226 1.496600866  
 H 10.664705276 -2.568027258 1.352902889  
 H 9.545710564 -2.809010267 0.005033525  
 C 9.119339943 -0.267339438 1.120955467  
 H 9.012859344 -0.227482766 0.030864213  
 H 10.164931297 -0.047034360 1.363838911  
 H 8.493253708 0.523963809 1.545825481  
 C 4.982292652 -2.554114103 -1.626618266  
 H 3.936394215 -2.259849310 -1.739069223  
 C 5.070485115 -4.057509899 -1.965794921  
 H 6.088266373 -4.424660683 -1.792294741  
 H 4.827740669 -4.217825890 -3.022726774  
 H 4.391125679 -4.654014587 -1.360194564  
 C 5.812059879 -1.774494648 -2.666668177  
 H 5.952229977 -0.726357996 -2.392496347  
 H 5.315235138 -1.808591485 -3.641829967  
 H 6.804548264 -2.219572783 -2.795937777  
 C -0.614770889 2.432709217 1.223701596  
 C -0.618565023 2.805694103 2.573166370  
 H -0.590113938 2.050560713 3.352658749  
 C -0.684203982 4.155924320 2.929289341  
 H -0.678621054 4.433086872 3.980911016  
 C -0.771889627 5.141647339 1.945617795  
 C -0.816434026 4.766749859 0.602227151  
 H -0.911745012 5.524510860 -0.172141850  
 C -0.748473704 3.417943716 0.239013225  
 H -0.806954920 3.147751570 -0.808956683  
 C 2.935881853 1.165845037 1.379343629  
 C 2.007254124 0.333001614 -1.537963629  
 C 6.330925941 -2.050957441 2.446579695  
 H 6.702867985 -1.983180523 3.464922428  
 H -0.823558152 6.190808296 2.223940134

Cl -2.943490744 0.572769940 0.981988072  
 H 1.469385386 -5.737786293 0.693534672  
 H -0.494187951 -4.313028812 0.442181021  
 O -0.518010557 -1.705637574 0.264040649  
 O 3.990496635 -4.813476563 0.907648444  
 C -1.741198540 -2.352832079 -0.139833301  
 H -1.560737491 -2.954663038 -1.036630630  
 H -2.134346008 -2.972316742 0.671352267  
 H -2.443937063 -1.545167327 -0.333404422  
 C 3.888836384 -6.226387978 0.988154769  
 H 3.267335415 -6.542780399 1.836556196  
 H 3.483240604 -6.658803940 0.063381910  
 H 4.908036709 -6.586516857 1.135570049  
 C 1.197867393 1.558929563 -2.009620428  
 H 0.122943379 1.382263303 -1.919071078  
 H 1.436462998 2.466606140 -1.453194976  
 H 1.427631617 1.742809176 -3.066937685  
 C 1.451833010 -0.899154067 -2.282299757  
 H 1.509285450 -0.712270796 -3.361357927  
 H 2.010177851 -1.812581897 -2.067837000  
 H 0.402088702 -1.074514389 -2.029053688  
 C 3.487111568 0.551862478 -1.885412693  
 H 3.814229488 1.560477018 -1.620409369  
 H 4.137987137 -0.154392347 -1.377408504  
 H 3.634725809 0.433478922 -2.965599537  
 C 2.463810921 0.973150790 2.835791826  
 H 1.449722052 1.344478846 2.977293491  
 H 2.490505934 -0.075216994 3.139485121  
 H 3.125478506 1.533980131 3.506469965  
 C 2.707405567 2.637731075 0.965825915  
 H 1.660852909 2.928648472 0.965715587  
 H 3.226213694 3.271577597 1.694951534  
 H 3.139912605 2.856474400 -0.014085908  
 C 4.451730251 0.917613685 1.292685270  
 H 4.941817284 1.660044432 1.935388684  
 H 4.744184971 -0.060818791 1.647264004  
 H 4.849589825 1.050774097 0.287253797

=====  
 L4\_180  
 =====

Pd -0.545090854 0.530569673 0.920497477  
 P 1.699940801 0.053333987 0.345014900  
 C 1.868700862 -1.846247196 0.610065460  
 C 0.597406805 -2.487395525 0.734356821  
 C 0.467543304 -3.867928267 0.858560801  
 C 1.576309800 -4.692077637 0.773083150  
 C 2.821798086 -4.124461174 0.544700503  
 C 3.002616167 -2.714865208 0.423221201  
 C 4.473335743 -2.380270481 0.334762454  
 C 5.209733009 -2.315148592 1.546271563  
 C 7.293534279 -2.110842466 0.286009759  
 C 6.557685375 -2.233917475 -0.893312395  
 H 7.087206364 -2.218254328 -1.840265036  
 C 5.169190884 -2.403951406 -0.899652183  
 C 4.546504974 -2.409038782 2.921807528  
 H 3.481661797 -2.194177628 2.798388958  
 C 4.665853500 -3.835522890 3.497233629

H 4.208204746 -4.574503422 2.838665962  
H 4.181073666 -3.893987656 4.478404522  
H 5.720483780 -4.106167316 3.623355389  
C 5.113475800 -1.399443030 3.940278053  
H 6.117282867 -1.684833169 4.272837639  
H 4.475913048 -1.369120121 4.830411911  
H 5.172003269 -0.388300985 3.531942844  
C 8.802011490 -1.916135788 0.259383768  
H 9.143229485 -1.863767982 1.301975131  
C 9.519872665 -3.104415655 -0.406428456  
H 9.267349243 -4.046694756 0.090225674  
H 10.607005119 -2.973926306 -0.363829404  
H 9.237559319 -3.196286917 -1.461274147  
C 9.180850029 -0.588496268 -0.423408687  
H 8.876152039 -0.587889314 -1.476174235  
H 10.264387131 -0.428272218 -0.389073581  
H 8.691944122 0.260223627 0.065557465  
C 4.486401558 -2.688400984 -2.240347624  
H 3.449300051 -2.356860399 -2.165839672  
C 4.459392071 -4.197998047 -2.563304186  
H 5.474520683 -4.609800816 -2.539650917  
H 4.050985336 -4.358117104 -3.567886114  
H 3.853742599 -4.757018089 -1.852459192  
C 5.138776779 -1.952389002 -3.428890944  
H 5.368420601 -0.907978594 -3.204615831  
H 4.467899799 -1.975967050 -4.294114113  
H 6.071633816 -2.439855814 -3.732988358  
C -0.490058452 2.478471279 1.329643726  
C -0.298921108 2.862671852 2.662681341  
H -0.206002980 2.113972187 3.443463564  
C -0.237768158 4.217027664 3.004395247  
H -0.076119311 4.499633312 4.042058468  
C -0.391102999 5.199710846 2.025203228  
C -0.638497114 4.815870762 0.705967486  
H -0.791608334 5.571251392 -0.061484873  
C -0.700964808 3.462502003 0.357958108  
H -0.915978193 3.188454628 -0.668163776  
C 3.033699274 1.112144828 1.228917360  
C 1.773170233 0.279520065 -1.565658331  
C 6.599574566 -2.177755833 1.492094994  
H 7.160969734 -2.110882998 2.419790983  
H -0.339574307 6.252134323 2.290392160  
Cl -2.905278921 0.720862448 1.211748719  
H 1.453087091 -5.762060642 0.881559193  
H -0.503723323 -4.316931725 1.007155061  
O -0.555335343 -1.725695372 0.677074432  
O 3.961801767 -4.880551815 0.461912841  
C -1.828791976 -2.391634941 0.543814242  
H -1.806692123 -3.063016415 -0.320592374  
H -2.069963932 -2.944075584 1.456854224  
H -2.557185650 -1.593921065 0.410353273  
C 3.856039047 -6.293053627 0.543222368  
H 3.459442616 -6.616799355 1.514888644  
H 3.225568771 -6.701391220 -0.258224875  
H 4.873050690 -6.670727253 0.427849978  
C 3.205242872 0.449709713 -2.094894648  
H 3.584012508 1.454792142 -1.891389728  
H 3.901793957 -0.262195349 -1.659679055

H 3.211691856 0.313769341 -3.182837248  
C 0.954839647 1.528090000 -1.960243225  
H 1.067973733 1.688646197 -3.040190220  
H -0.107852638 1.389704943 -1.747036695  
H 1.284473062 2.434586048 -1.450737357  
C 1.078183889 -0.937774122 -2.213382721  
H 1.605336308 -1.877121449 -2.039745331  
H 0.056796502 -1.051835775 -1.837245107  
H 1.021003604 -0.776498973 -3.296310663  
C 2.785228729 2.589154720 0.846558809  
H 3.110771418 2.800403118 -0.175584421  
H 1.751088262 2.899631023 0.959403694  
H 3.393115759 3.212144375 1.513430476  
C 4.521481514 0.838195026 0.959004939  
H 4.801352501 0.993917227 -0.082461253  
H 5.102266788 1.550083041 1.559146881  
H 4.829559803 -0.157923728 1.241443276  
C 2.732827663 0.917549610 2.730018377  
H 3.459583759 1.487620592 3.320795774  
H 1.736424088 1.278234959 2.984780073  
H 2.807909489 -0.130167440 3.030561924

=====  
1  
=====

C 2.737650156 -0.248603463 0.791408300  
C 2.754945755 -1.521768212 1.408639789  
C 3.361576080 -2.591358662 0.744358063  
C 3.951585770 -2.447715044 -0.514452219  
C 3.906242371 -1.188472509 -1.112356305  
C 3.314295530 -0.084281035 -0.488143712  
C 2.298834562 0.949552357 1.593999028  
C 1.028859377 1.571425915 1.558084488  
C 0.777145565 2.645280123 2.431236029  
C 1.742933273 3.124499083 3.310412169  
C 3.004707336 2.530470133 3.325403690  
C 3.268141747 1.459940791 2.477013588  
H 3.388675451 -3.562361717 1.232539892  
H 4.354510307 -1.061028123 -2.093958139  
H -0.195919588 3.129340172 2.411051512  
H 1.516095996 3.958230495 3.969380856  
H 3.778675079 2.895548582 3.995101213  
H 4.247553825 0.990812004 2.489917755  
P -0.301536262 1.046984196 0.378841460  
Pd 0.186660051 -0.688476086 -1.036977053  
C -1.703915954 0.698098242 1.597743154  
C -3.048863411 0.431725383 0.893706739  
C -1.316852689 -0.498700500 2.486104250  
H -1.816733956 1.587549210 2.235301256  
C -4.152342319 0.054153930 1.898885965  
H -2.913071394 -0.382855296 0.168731660  
H -3.367147684 1.315448284 0.331279397  
C -2.423046827 -0.868258595 3.485294580  
H -1.115098476 -1.357568264 1.834069729  
H -0.389314562 -0.280311465 3.023725748  
C -3.747244835 -1.148890615 2.762081861  
H -5.085531712 -0.153728738 1.360704660  
H -4.353874683 0.914541841 2.554246426

H -2.110799313 -1.739561081 4.074729443  
H -2.565203190 -0.041652624 4.197085381  
H -4.538751125 -1.389084458 3.482674360  
H -3.624271393 -2.030892849 2.116535664  
C -0.844233930 2.675313473 -0.421682775  
C 0.330984324 3.603534460 -0.794097364  
C -1.672807693 2.383670330 -1.694671631  
H -1.485731721 3.200455427 0.303186208  
C -0.171491772 4.908651352 -1.435090065  
H 0.980076909 3.079904795 -1.507460952  
H 0.943041503 3.834115505 0.082337409  
C -2.193252087 3.681380033 -2.333835363  
H -1.027893662 1.851308823 -2.406974554  
H -2.504378319 1.706888556 -1.481776714  
C -1.038820267 4.635598183 -2.672730684  
H 0.682956100 5.544467449 -1.698430538  
H -0.761682630 5.467915535 -0.694085121  
H -2.773241997 3.445752144 -3.234744310  
H -2.884534121 4.177796841 -1.636596680  
H -1.423595428 5.575614929 -3.086950779  
H -0.414666384 4.177475929 -3.453565121  
C 0.162236348 -2.477741241 -2.292883396  
C -1.126272321 -2.044876575 -2.708583355  
C 0.292341053 -3.295929670 -1.138111115  
C -2.262512684 -2.529502153 -2.036426783  
H -1.225385904 -1.459097981 -3.615879536  
C -0.859119117 -3.740883827 -0.482846797  
H 1.276134968 -3.606392622 -0.811392128  
C -2.133842468 -3.390538931 -0.948056817  
H -3.246423244 -2.228537321 -2.385605574  
H -0.751367867 -4.376549244 0.391429245  
Cl 1.521068096 -2.375118256 -3.454335451  
H -3.019116879 -3.770734787 -0.446544379  
C 3.378083229 1.281072974 -1.163441658  
H 2.752833366 1.966141343 -0.585294425  
C 2.824815273 1.261403441 -2.598486423  
C 4.815206051 1.833446383 -1.123418212  
H 5.178293705 1.906520844 -0.092605181  
H 5.501053810 1.180824876 -1.675683618  
H 4.860860825 2.831697941 -1.573727131  
H 3.420350075 0.623618066 -3.260196924  
H 2.828188419 2.273129702 -3.021418333  
H 1.796659470 0.881595850 -2.608287811  
C 2.156270981 -1.754904032 2.792561293  
H 1.568139672 -0.872001886 3.054891586  
C 3.257069111 -1.904281735 3.858633280  
C 1.205850959 -2.965619326 2.815403938  
H 0.478824943 -2.905543566 2.002318621  
H 1.752069712 -3.909844398 2.710479259  
H 0.660881758 -3.006777287 3.765494823  
H 3.905959368 -2.757633209 3.630864382  
H 2.818930387 -2.067303896 4.850238800  
H 3.883812428 -1.008605003 3.907461405  
C 4.662793636 -3.612242222 -1.191233397  
H 4.999886036 -3.260097980 -2.175004959  
C 3.736676216 -4.819158077 -1.427165508  
C 5.910170555 -4.030866623 -0.388966382  
H 6.586731434 -3.183476210 -0.238774374

H 5.628873825 -4.412404060 0.599409044  
H 6.460497379 -4.823375225 -0.908791482  
H 3.337124348 -5.205545425 -0.481904536  
H 4.284512997 -5.636107922 -1.910274029  
H 2.894387722 -4.550589561 -2.070216656

=====  
I-TS  
=====

C 2.727058649 -0.093022443 0.550202906  
C 2.654387236 -1.413146973 1.068050861  
C 3.266211510 -2.453073025 0.365760237  
C 3.940964222 -2.240039349 -0.839716494  
C 3.995004416 -0.937804461 -1.335390687  
C 3.408461809 0.142397493 -0.665463090  
C 2.289926767 1.064193368 1.415993333  
C 0.988119185 1.622717381 1.483037829  
C 0.746208906 2.649711609 2.414125443  
C 1.748721480 3.147166729 3.242825985  
C 3.033588409 2.611888647 3.163135767  
C 3.287235260 1.579983234 2.263367653  
H 3.212535381 -3.459636450 0.769761562  
H 4.516129017 -0.759132922 -2.272083759  
H -0.250757039 3.067434311 2.501911879  
H 1.524029851 3.942804337 3.947976828  
H 3.828748226 2.983795881 3.803137064  
H 4.279138088 1.139951825 2.212902546  
P -0.386989236 0.986892164 0.411973059  
Pd 0.233899713 -0.860298932 -0.825435162  
C -1.816016197 0.788567841 1.616796374  
C -3.128111124 0.539001226 0.844727933  
C -1.523172617 -0.365714103 2.594532251  
H -1.921244860 1.714388967 2.198618650  
C -4.304593086 0.249573901 1.791835189  
H -2.990396261 -0.312631488 0.171153933  
H -3.376106739 1.402171254 0.217174590  
C -2.708710670 -0.641321957 3.533018827  
H -1.306244373 -1.268949032 2.011827230  
H -0.626184821 -0.137999132 3.181566238  
C -3.991634607 -0.919175744 2.736359358  
H -5.202728748 0.035261013 1.199635267  
H -4.525017262 1.147862196 2.387778997  
H -2.469862938 -1.487865925 4.188869476  
H -2.868362427 0.228234172 4.187757969  
H -4.834304333 -1.102137923 3.414495468  
H -3.855490208 -1.832027316 2.139503241  
C -0.945538938 2.435952187 -0.655316055  
C -1.444631934 3.708910942 0.053802595  
C 0.111841649 2.797002316 -1.712684035  
H -1.794115424 1.985718131 -1.190876484  
C -2.018289566 4.710556030 -0.966092527  
H -0.604640126 4.180966854 0.579075992  
H -2.205024242 3.472418785 0.807043374  
C -0.446180522 3.800088882 -2.735090494  
H 0.984657884 3.238831997 -1.213129640  
H 0.454956651 1.888590813 -2.216867924  
C -0.984652102 5.064359188 -2.047102451  
H -2.357311249 5.616934299 -0.449047059

|    |              |              |              |   |              |              |              |
|----|--------------|--------------|--------------|---|--------------|--------------|--------------|
| H  | -2.906422615 | 4.269261360  | -1.441548228 | C | 0.457060337  | -2.537976503 | -0.016110215 |
| H  | 0.330389977  | 4.060853958  | -3.464801550 | C | -0.913052082 | -1.910479426 | -0.152354851 |
| H  | -1.258992553 | 3.319613695  | -3.299261093 | C | -1.529360652 | -1.832123995 | -1.431205273 |
| H  | -1.422672153 | 5.747048378  | -2.785423040 | C | -3.718446732 | -1.550999761 | -0.376660973 |
| H  | -0.147370055 | 5.602319717  | -1.578621864 | C | -3.098293781 | -1.611385107 | 0.875018954  |
| C  | -1.373663664 | -2.058443785 | -1.752453327 | H | -3.706266642 | -1.517591119 | 1.769685149  |
| C  | -2.190543413 | -1.299498677 | -2.611238003 | C | -1.723490953 | -1.786607504 | 1.015737772  |
| C  | -1.950446367 | -2.924985886 | -0.805106401 | C | -0.714954197 | -1.977953672 | -2.709160328 |
| C  | -3.572546005 | -1.330673814 | -2.436306477 | H | 0.339168102  | -1.882089496 | -2.436263084 |
| H  | -1.735603333 | -0.688716888 | -3.384169579 | C | -0.902824998 | -3.373900890 | -3.333233595 |
| C  | -3.337593555 | -2.944239378 | -0.654947162 | H | -0.582900524 | -4.163800240 | -2.646610737 |
| H  | -1.314911127 | -3.567902803 | -0.204998612 | H | -0.317509204 | -3.467205763 | -4.255262852 |
| C  | -4.157445431 | -2.145998716 | -1.459208131 | H | -1.955792189 | -3.547024012 | -3.581643343 |
| H  | -4.199722290 | -0.715336263 | -3.078009844 | C | -1.038595557 | -0.868728220 | -3.726619244 |
| H  | -3.778893471 | -3.597409248 | 0.094972745  | H | -2.021592855 | -1.019363403 | -4.185592175 |
| Cl | 0.365575373  | -2.675711393 | -2.490226507 | H | -0.297627658 | -0.863561451 | -4.533983231 |
| H  | -5.237013817 | -2.170615911 | -1.338863611 | H | -1.049235463 | 0.114229262  | -3.247507095 |
| C  | 3.531811953  | 1.546447992  | -1.243511796 | C | -5.226148129 | -1.397485137 | -0.496472180 |
| H  | 2.776422024  | 2.168333769  | -0.755027890 | H | -5.458886147 | -1.292695165 | -1.564236999 |
| C  | 3.254019260  | 1.584271073  | -2.756312370 | C | -5.944601536 | -2.659682035 | 0.019410301  |
| C  | 4.910269737  | 2.157869577  | -0.928406417 | H | -5.608995438 | -3.557056665 | -0.511092961 |
| H  | 5.077372074  | 2.227528572  | 0.150577232  | H | -7.028534889 | -2.567988634 | -0.112075701 |
| H  | 5.710567474  | 1.543110013  | -1.355938673 | H | -5.750212669 | -2.809609890 | 1.087802768  |
| H  | 4.993670940  | 3.165982008  | -1.351107359 | C | -5.741693974 | -0.137017772 | 0.221952811  |
| H  | 4.076640606  | 1.144989491  | -3.330789089 | H | -5.582825661 | -0.205852583 | 1.304417729  |
| H  | 3.135734320  | 2.619093180  | -3.096372843 | H | -6.817940235 | -0.017460920 | 0.052195411  |
| H  | 2.342514515  | 1.031972766  | -3.000596046 | H | -5.218461037 | 0.753834665  | -0.131732285 |
| C  | 1.959975362  | -1.708233595 | 2.392715931  | C | -1.122360110 | -1.898276210 | 2.411273003  |
| H  | 1.340272546  | -0.843674839 | 2.640236855  | H | -0.035229716 | -1.878436089 | 2.304539919  |
| C  | 2.992416859  | -1.873717308 | 3.523077488  | C | -1.492586255 | -3.242770433 | 3.065041542  |
| C  | 1.025269508  | -2.927061796 | 2.314623117  | H | -2.578685284 | -3.337366819 | 3.173494816  |
| H  | 0.340188712  | -2.834309101 | 1.466628790  | H | -1.044070363 | -3.325159788 | 4.061761856  |
| H  | 1.581722379  | -3.863442421 | 2.198756218  | H | -1.138528347 | -4.085091591 | 2.461802721  |
| H  | 0.432051063  | -3.009314299 | 3.232251883  | C | -1.517284155 | -0.712011814 | 3.307931423  |
| H  | 3.666993618  | -2.711025953 | 3.311587334  | H | -1.309574366 | 0.238557205  | 2.808304071  |
| H  | 2.494770050  | -2.070425510 | 4.479743958  | H | -0.956655979 | -0.742992640 | 4.249132633  |
| H  | 3.599944353  | -0.970165730 | 3.634803295  | H | -2.583579302 | -0.729023337 | 3.557235479  |
| C  | 4.622650623  | -3.387040854 | -1.571169853 | C | 0.217348665  | 2.593318462  | 0.209088206  |
| H  | 5.026966572  | -2.982557774 | -2.508775949 | C | -0.000699962 | 3.167373896  | 1.466859818  |
| C  | 3.638904572  | -4.513075829 | -1.937679291 | H | -0.535764933 | 2.620928764  | 2.237119198  |
| C  | 5.804070950  | -3.937955141 | -0.749088526 | C | 0.470673293  | 4.456080437  | 1.736229420  |
| H  | 6.526758671  | -3.149391174 | -0.515287340 | H | 0.300942212  | 4.893073082  | 2.717573881  |
| H  | 5.454582214  | -4.362912655 | 0.198953420  | C | 1.151661038  | 5.180889606  | 0.754578769  |
| H  | 6.325157642  | -4.730294228 | -1.298398376 | C | 1.338566184  | 4.616232395  | -0.507679522 |
| H  | 3.211219788  | -4.975167751 | -1.040616512 | H | 1.849649787  | 5.178295612  | -1.285944223 |
| H  | 4.148681641  | -5.300121784 | -2.505126953 | C | 0.865727842  | 3.328504086  | -0.786701858 |
| H  | 2.809208632  | -4.132179737 | -2.538947582 | H | 1.005252361  | 2.909606934  | -1.778509498 |

=====

1A

=====

|    |              |              |              |   |             |              |             |
|----|--------------|--------------|--------------|---|-------------|--------------|-------------|
| Pd | -0.442613065 | 0.732785344  | -0.103627257 | C | 3.363394260 | 1.848454356  | 1.569670081 |
| P  | 1.730462074  | -0.019797169 | 0.119792767  | C | 1.921880484 | 0.226623282  | 2.908323526 |
| C  | 1.686114550  | -1.859501362 | 0.146036297  | H | 3.588621378 | -0.290557444 | 1.652194858 |
| C  | 2.861954451  | -2.606303692 | 0.345061600  | C | 4.167021275 | 2.154591322  | 2.845592022 |
| C  | 2.846290588  | -3.997846127 | 0.358924121  | H | 2.567006588 | 2.588639259  | 1.461859584 |
| C  | 1.638309240  | -4.671100140 | 0.176465064  | H | 4.016460896 | 1.954944491  | 0.697613180 |
| C  | 0.465268672  | -3.944010735 | -0.002058229 | C | 2.726223230 | 0.563335478  | 4.173900127 |
|    |              |              |              | H | 1.037217259 | 0.870276392  | 2.855144978 |
|    |              |              |              | H | 1.562922597 | -0.806353092 | 2.961104870 |
|    |              |              |              | C | 3.305993795 | 1.983375669  | 4.105198860 |

|    |              |              |              |    |              |              |              |
|----|--------------|--------------|--------------|----|--------------|--------------|--------------|
| H  | 4.564849377  | 3.174675226  | 2.786750793  | H  | 2.711086988  | 1.010201812  | -0.514291644 |
| H  | 5.034557343  | 1.480120063  | 2.904826403  | H  | 1.342970610  | -0.939576626 | -1.202790976 |
| H  | 2.085065365  | 0.447853088  | 5.056288719  | H  | 0.036027759  | -0.426975697 | -0.145023584 |
| H  | 3.548166752  | -0.159194440 | 4.285804749  | H  | 1.086991549  | 1.088537574  | -2.599788666 |
| H  | 3.893790483  | 2.201757669  | 5.004933357  | H  | -0.655654371 | 2.781302691  | -2.135621548 |
| H  | 2.481969357  | 2.710202932  | 4.076436996  | H  | -1.202402592 | 1.889008045  | -0.719632685 |
| C  | 2.810005665  | 0.499581188  | -1.321370840 | H  | 0.265931487  | 3.791021824  | -0.064194791 |
| C  | 4.245892525  | -0.059227590 | -1.353384376 | H  | 1.556493640  | 3.174124241  | -1.069453239 |
| C  | 2.121510983  | 0.260490477  | -2.677137852 | H  | -0.473892540 | 0.280832052  | -2.474907875 |
| H  | 2.865706682  | 1.585461020  | -1.168669701 | C  | 4.004959583  | 2.769409657  | 1.400858879  |
| C  | 5.053731918  | 0.604014874  | -2.484495640 | C  | 5.010738373  | 3.304043055  | 2.440809727  |
| H  | 4.206361771  | -1.140826702 | -1.533117652 | C  | 6.456822872  | 3.091742277  | 1.963392258  |
| H  | 4.756375313  | 0.090520687  | -0.395322114 | C  | 6.700745106  | 3.742064476  | 0.595628202  |
| C  | 2.917992830  | 0.915447533  | -3.816903114 | C  | 5.709247112  | 3.193397045  | -0.438251197 |
| H  | 2.053198814  | -0.819690943 | -2.860074997 | C  | 4.255844593  | 3.406035423  | 0.016688228  |
| H  | 1.097680211  | 0.644792676  | -2.657037973 | H  | 4.134512901  | 1.679906607  | 1.320752621  |
| C  | 4.369557858  | 0.412605673  | -3.847235680 | H  | 4.870840073  | 2.801875114  | 3.402779818  |
| H  | 6.070121765  | 0.192170158  | -2.504928112 | H  | 4.827252865  | 4.374430656  | 2.590909958  |
| H  | 5.153178692  | 1.678243756  | -2.272321939 | H  | 7.146093845  | 3.497979403  | 2.713344574  |
| H  | 2.422711611  | 0.719581902  | -4.775370598 | H  | 6.663872719  | 2.012543201  | 1.896535635  |
| H  | 2.911224127  | 2.006136417  | -3.676407099 | H  | 6.564783573  | 4.828226566  | 0.684230983  |
| H  | 4.936674118  | 0.924685776  | -4.633620739 | H  | 5.855717182  | 3.678708315  | -1.410480380 |
| H  | 4.372986794  | -0.657326102 | -4.101834774 | H  | 5.895449162  | 2.119145632  | -0.588979483 |
| C  | -2.912640810 | -1.651501775 | -1.510606408 | H  | 3.578691959  | 2.987195730  | -0.732971430 |
| H  | -3.379116535 | -1.580317736 | -2.488604069 | H  | 4.045250416  | 4.478687286  | 0.083919927  |
| H  | 1.522565007  | 6.179292679  | 0.969036222  | H  | 7.732978821  | 3.570462465  | 0.267210186  |
| Cl | -2.582054138 | 1.646079898  | -0.566814482 | Pd | 1.536312819  | 5.099114418  | 2.087695837  |
| H  | -0.479664713 | -4.465387821 | -0.121298783 | C  | 3.956042051  | -0.824287713 | 3.235539675  |
| H  | 1.606223106  | -5.757095814 | 0.184986055  | H  | 4.040106297  | 0.241640136  | 3.470622301  |
| H  | 3.768880606  | -4.550144672 | 0.512894511  | C  | 4.869294643  | -1.093269467 | 2.025907755  |
| H  | 3.805860043  | -2.095705748 | 0.499969304  | C  | 4.441931725  | -1.604349732 | 4.471200943  |

=====  
**1B**  
=====

|   |              |              |              |   |              |              |              |
|---|--------------|--------------|--------------|---|--------------|--------------|--------------|
| C | 1.468134522  | -0.210075349 | 3.303257227  | H | 3.849879742  | -1.348183155 | 5.354895115  |
| C | 0.116264880  | -0.501871645 | 3.022620678  | H | 4.353412628  | -2.683981180 | 4.305250168  |
| C | -0.189797923 | -1.718305707 | 2.401605129  | H | 5.492127895  | -1.377502084 | 4.686657429  |
| C | 0.794185519  | -2.645450354 | 2.054756165  | H | 4.946532726  | -2.162324667 | 1.800896168  |
| C | 2.126868486  | -2.327636242 | 2.334858894  | H | 5.881718159  | -0.728855491 | 2.231844664  |
| C | 2.485905647  | -1.125886798 | 2.950609922  | H | 4.505897999  | -0.590168297 | 1.124421239  |
| C | 1.840931892  | 0.980772138  | 4.133926392  | C | -1.000307202 | 0.463130832  | 3.412307739  |
| C | 2.199910879  | 2.263746738  | 3.671184301  | H | -0.564956367 | 1.462497711  | 3.504296064  |
| C | 2.624026775  | 3.220978260  | 4.620245457  | C | -1.591263056 | 0.102006607  | 4.789057732  |
| C | 2.680519819  | 2.944081545  | 5.981061459  | C | -2.123556376 | 0.554514647  | 2.366021633  |
| C | 2.289045095  | 1.687631488  | 6.442082405  | H | -1.727072835 | 0.716092527  | 1.359388828  |
| C | 1.881600618  | 0.730886638  | 5.520303726  | H | -2.734620810 | -0.354784608 | 2.341504812  |
| H | -1.227478743 | -1.954150319 | 2.180910349  | H | -2.781119347 | 1.394475222  | 2.605891943  |
| H | 2.906645775  | -3.033934355 | 2.064249516  | H | -2.033241987 | -0.901036382 | 4.768922806  |
| P | 2.215640306  | 2.939769745  | 1.941378355  | H | -2.374212503 | 0.817547917  | 5.063776493  |
| C | 1.191259146  | 1.964734554  | 0.705217719  | H | -0.826157629 | 0.120509863  | 5.569970131  |
| C | 1.854500532  | 0.708076358  | 0.101237431  | C | 0.423647821  | -3.956444025 | 1.376072645  |
| C | 0.849749804  | -0.055633616 | -0.781062186 | H | -0.671133578 | -3.983964920 | 1.294456244  |
| C | 0.280675560  | 0.829543889  | -1.898348927 | C | 0.859818697  | -5.173275471 | 2.212226629  |
| C | -0.315971166 | 2.124049425  | -1.326030731 | C | 0.998959541  | -4.032094955 | -0.050633222 |
| C | 0.703029871  | 2.872535229  | -0.451685160 | H | 0.652418137  | -3.191935778 | -0.660171866 |
| H | 0.314303219  | 1.666684866  | 1.288443208  | H | 2.094487906  | -4.003902912 | -0.034180373 |
| H | 2.227853775  | 0.043743052  | 0.876017153  | H | 0.696043074  | -4.962611675 | -0.543762326 |
|   |              |              |              | H | 1.950483322  | -5.215672970 | 2.309650421  |
|   |              |              |              | H | 0.532503843  | -6.105729103 | 1.739075184  |
|   |              |              |              | H | 0.435716748  | -5.132578373 | 3.220513344  |
|   |              |              |              | H | 1.593615413  | -0.258307874 | 5.862194061  |

H 2.305754185 1.452815890 7.502440453  
H 3.012749195 3.713262558 6.671875000  
H 2.896790743 4.215929031 4.279481888  
C -0.284469604 4.427300453 2.644050598  
C -0.560371697 4.073010921 3.973906994  
C -1.363325357 4.595737934 1.758546948  
C -1.879631639 3.923310757 4.413548946  
C -2.681068182 4.443408012 2.200387239  
C -2.943560600 4.101625443 3.528092384  
H 0.245993540 3.919454813 4.681848049  
H -1.195226908 4.879877567 0.723734736  
H -2.071011782 3.659536362 5.451054096  
H -3.501008034 4.590462685 1.501489878  
H -3.967906237 3.977814674 3.869528770  
Cl 3.401513815 6.531246185 1.649693489

=====  
1C  
=====

C 2.138978243 -7.417065620 -3.732271433  
C 0.961661756 -7.734059334 -3.017455101  
C 0.525609791 -9.062603951 -2.974451303  
C 1.224745512 -10.090081215 -3.603668213  
C 2.407471895 -9.761014938 -4.270768166  
C 2.886828184 -8.449836731 -4.352304935  
C 2.692713261 -6.017095566 -3.663007021  
C 2.524958372 -4.958528519 -4.589204311  
C 3.210958481 -3.750110149 -4.347220421  
C 3.986470461 -3.538748741 -3.214526653  
C 4.113233089 -4.563098907 -2.279371262  
C 3.481551647 -5.777150631 -2.520135403  
H -0.384666294 -9.305843353 -2.432434320  
H 2.971853733 -10.553988457 -4.747510910  
H 3.140989304 -2.956952095 -5.083817005  
H 4.490256310 -2.586945057 -3.071969032  
H 4.709065437 -4.427483559 -1.381097436  
H 3.594409227 -6.589900970 -1.808751225  
P 1.468229055 -4.819747448 -6.105085850  
C 0.179595158 -3.531282187 -5.648001671  
C 0.678143263 -2.072614670 -5.613828659  
C -0.520377576 -1.117172480 -5.479557991  
C -1.343088746 -1.428097129 -4.218689442  
C -1.793795943 -2.896654844 -4.197347164  
C -0.601475656 -3.855345964 -4.364038944  
H -0.487847149 -3.599947691 -6.514220238  
H 1.240485668 -1.846773863 -6.524313450  
H 1.339174271 -1.923043132 -4.751026630  
H -0.164324015 -0.079971470 -5.455282211  
H -1.152396917 -1.213864088 -6.372390747  
H -0.726435602 -1.230397701 -3.329262018  
H -2.324760199 -3.124482870 -3.264276028  
H -2.505920649 -3.070387840 -5.016579628  
H -0.959642589 -4.887584209 -4.373123169  
H 0.071015127 -3.755481720 -3.501503229  
H -2.212594748 -0.762814581 -4.152147293  
C 0.509705901 -6.401945114 -6.373676777  
C 1.356668115 -7.383554935 -7.209847927  
C 0.651736975 -8.739457130 -7.344870090

C -0.728173196 -8.566403389 -7.996290207  
C -1.575967908 -7.546475410 -7.220353127  
C -0.859844744 -6.192199707 -7.055430412  
H 0.342315048 -6.839090347 -5.385161877  
H 2.348424673 -7.502440453 -6.775504589  
H 1.505917907 -6.946232796 -8.206343651  
H 1.274364710 -9.425400734 -7.933342457  
H 0.544919312 -9.188762665 -6.348816395  
H -0.597624600 -8.212911606 -9.029110909  
H -2.539903879 -7.390946388 -7.719775677  
H -1.799503326 -7.952917576 -6.222331047  
H -1.498634577 -5.527793407 -6.465753555  
H -0.714819372 -5.708314896 -8.029689789  
H -1.251509428 -9.528881073 -8.054645538  
Pd 2.535534382 -4.191094875 -8.050200462  
Cl 0.497088850 -3.146031141 -9.025276184  
C 4.281089306 -5.111863136 -7.584958076  
C 4.636611938 -6.238898754 -8.348559380  
C 5.246030331 -4.579241276 -6.717260838  
C 5.917518139 -6.794387817 -8.265129089  
C 6.519952297 -5.149440289 -6.614985466  
C 6.865752220 -6.256429672 -7.392228603  
H 3.910068035 -6.696824551 -9.016653061  
H 5.017287731 -3.712475538 -6.108450413  
H 6.168040752 -7.659607410 -8.875163078  
H 7.246020794 -4.718133450 -5.929230213  
H 7.858323097 -6.692730427 -7.319865704  
N 3.489397764 -3.615910530 -9.951345444  
H 2.745504618 -3.152344942 -10.472484589  
H 3.816960335 -4.434289932 -10.457834244  
C 4.214665413 -8.179997444 -5.066764832  
H 4.174418926 -7.177057743 -5.507423878  
C 4.505934238 -9.175527573 -6.203660488  
C 5.397181034 -8.195697784 -4.075621128  
H 5.287407398 -7.436529160 -3.299022675  
H 5.476306915 -9.175129890 -3.588920355  
H 6.333250046 -7.998014927 -4.609186649  
H 4.720568657 -10.178791046 -5.818363667  
H 5.384466171 -8.843794823 -6.759531498  
H 3.671296835 -9.256306648 -6.906563282  
C 0.739463687 -11.528796196 -3.510327578  
H -0.295386493 -11.498170853 -3.142856836  
C 1.580342889 -12.318439484 -2.488861084  
C 0.718105197 -12.236103058 -4.875688076  
H 0.136299789 -11.667108536 -5.607974052  
H 1.729000568 -12.362754822 -5.277409077  
H 0.274508715 -13.233632088 -4.784169674  
H 2.627617359 -12.366492271 -2.809252024  
H 1.210358620 -13.344791412 -2.384776115  
H 1.554806232 -11.841066360 -1.503942013  
C 0.170258448 -6.671266079 -2.262780666  
H 0.489849657 -5.694530964 -2.631679296  
C 0.486962497 -6.718267441 -0.755094647  
C -1.346849203 -6.783224106 -2.495501041  
H -1.583941936 -6.869184971 -3.560708284  
H -1.772876620 -7.656807899 -1.990438104  
H -1.858385921 -5.898139954 -2.101959467  
H 0.224123940 -7.695971966 -0.335513294



H -0.082333051 -5.952333450 -0.215724751  
H 1.550358891 -6.545099735 -0.566667795  
H 4.274247169 -2.982481003 -9.824963570

=====  
1C'  
=====

C 2.041450500 -7.536070824 -3.666763306  
C 0.836332202 -7.832832813 -2.993879795  
C 0.363072008 -9.150813103 -2.989977360  
C 1.049752951 -10.184541702 -3.622407198  
C 2.255746365 -9.874625206 -4.258434772  
C 2.773743391 -8.577635765 -4.291440487  
C 2.645565033 -6.158906460 -3.564614296  
C 2.588222027 -5.100653648 -4.506863117  
C 3.357235193 -3.945949078 -4.255735874  
C 4.099599838 -3.775200844 -3.094597816  
C 4.102608204 -4.786709785 -2.137026548  
C 3.395462990 -5.956158161 -2.389111996  
H -0.570114017 -9.377681732 -2.480236292  
H 2.803967476 -10.671402931 -4.749485970  
H 3.382711887 -3.165247917 -5.005073071  
H 4.673351288 -2.864732027 -2.947451115  
H 4.666676044 -4.679811478 -1.214594245  
H 3.424783707 -6.765462875 -1.665737271  
P 1.574432492 -4.904467583 -6.048636913  
C 0.373902261 -3.519792318 -5.636109352  
C 0.964124322 -2.098935604 -5.745463848  
C -0.149488315 -1.050147295 -5.577942848  
C -0.886789083 -1.225774765 -4.240362644  
C -1.445863247 -2.649691582 -4.099928856  
C -0.344079912 -3.707088232 -4.288304806  
H -0.345152229 -3.614087582 -6.458295345  
H 1.462184548 -1.976370811 -6.712636948  
H 1.709631443 -1.939585447 -4.956636906  
H 0.279010713 -0.042772211 -5.647654057  
H -0.861497998 -1.149266601 -6.408677578  
H -0.185896605 -1.032901883 -3.414517879  
H -1.922919154 -2.782885075 -3.120589018  
H -2.227426767 -2.809625387 -4.856324673  
H -0.778071463 -4.707375526 -4.216269493  
H 0.391420752 -3.618043900 -3.477372885  
H -1.693756700 -0.488824636 -4.146334171  
C 0.530196905 -6.440269470 -6.293556690  
C 1.290545225 -7.431788445 -7.199083328  
C 0.539158821 -8.764098167 -7.313485146  
C -0.882831097 -8.541566849 -7.848741055  
C -1.640815854 -7.525918961 -6.979792595  
C -0.884189785 -6.189044952 -6.857209682  
H 0.425426066 -6.891448021 -5.304379940  
H 2.300558090 -7.591876507 -6.817807198  
H 1.396839142 -6.979452133 -8.194334984  
H 1.094871640 -9.450002670 -7.966014862  
H 0.495992750 -9.235950470 -6.324075222  
H -0.826598406 -8.161343575 -8.878613472  
H -2.641206741 -7.342247009 -7.390133858  
H -1.783864141 -7.951550484 -5.974930763  
H -1.453752756 -5.519662857 -6.204400063

H -0.810182035 -5.699759483 -7.835223675  
H -1.430701017 -9.491391182 -7.889976978  
Pd 2.667301416 -4.408470631 -8.015365601  
Cl 0.574652553 -3.712647438 -9.172609329  
C 4.502347946 -4.843410492 -7.311685562  
C 5.073946476 -6.110067844 -7.497772217  
C 5.315190315 -3.810839176 -6.817231655  
C 6.422989845 -6.338737488 -7.191713810  
C 6.655074596 -4.043050766 -6.496821404  
C 7.216073513 -5.309466839 -6.680901051  
H 4.472302437 -6.928852558 -7.884012699  
H 4.913455963 -2.807314634 -6.699607372  
H 6.853139877 -7.325356007 -7.350840569  
H 7.264575958 -3.227624416 -6.113619328  
H 8.259441376 -5.489999771 -6.435823917  
N 3.613195181 -4.155294895 -10.034937859  
H 2.758950233 -4.061279297 -10.586700439  
H 4.090516567 -5.024313927 -10.262984276  
C 4.475999355 -3.014859915 -10.128670692  
C 3.912452936 -1.743014812 -10.293164253  
C 5.857459545 -3.160561085 -9.967885017  
H 2.831718206 -1.646637559 -10.380929947  
H 6.282678604 -4.146204948 -9.792934418  
C 4.740987778 -0.620363891 -10.306211472  
C 6.676579952 -2.029601574 -9.983128548  
H 4.300168991 0.366521508 -10.432040215  
H 7.749742985 -2.147227049 -9.848316193  
C 6.125380993 -0.756874621 -10.152804375  
H 6.766201019 0.122084722 -10.159232140  
C 4.128318787 -8.322128296 -4.952551365  
H 4.132113934 -7.297049046 -5.336334229  
C 4.419079781 -9.263072968 -6.134577274  
C 5.279410362 -8.425557137 -3.930393696  
H 5.154244900 -7.718194485 -3.108124018  
H 5.329255104 -9.436739922 -3.509155750  
H 6.235856056 -8.207001686 -4.418880463  
H 4.611022472 -10.288130760 -5.798775196  
H 5.316361427 -8.926488876 -6.660538197  
H 3.593703985 -9.296024323 -6.852018356  
C 0.488008112 -11.598669052 -3.653621435  
H -0.416914999 -11.605974197 -3.031156063  
C 1.468291283 -12.627019882 -3.061717510  
C 0.073510133 -11.992645264 -5.084838390  
H -0.665302277 -11.293343544 -5.489735126  
H 0.938636482 -11.986635208 -5.757527351  
H -0.360075772 -12.998904228 -5.102784157  
H 2.384144306 -12.693866730 -3.659656286  
H 1.015311599 -13.624445915 -3.039504051  
H 1.755358577 -12.357788086 -2.040361404  
C 0.039879661 -6.758318901 -2.261425734  
H 0.440362424 -5.786004066 -2.558556080  
C 0.221973047 -6.882699013 -0.737172484  
C -1.454614878 -6.780773163 -2.631719351  
H -1.598401427 -6.785111904 -3.716853142  
H -1.959802151 -7.665546417 -2.229086637  
H -1.962908745 -5.900290489 -2.223189354  
H -0.130143419 -7.858077049 -0.382302314  
H -0.346959203 -6.105730057 -0.213664427

H 1.274397612 -6.781677246 -0.455354363

=====  
ID  
=====

C -2.326453686 -4.006380081 -3.729453325  
C -3.323587418 -3.257115364 -3.062819719  
C -4.585033894 -3.828718424 -2.874152422  
C -4.886476040 -5.117584229 -3.324826002  
C -3.884966612 -5.836415768 -3.978464603  
C -2.604519606 -5.312129021 -4.189301491  
C -0.919088900 -3.488487720 -3.787804842  
C -0.324778706 -2.756747961 -4.838556767  
C 1.032513857 -2.394327402 -4.709778309  
C 1.789216280 -2.716569662 -3.590184927  
C 1.198840380 -3.432752609 -2.551311255  
C -0.134650335 -3.809234381 -2.663398027  
H -5.353104591 -3.255919218 -2.362202168  
H -4.108538628 -6.840921402 -4.328210831  
P -1.072058797 -2.121731758 -6.419129372  
C -1.833956480 -0.485895485 -5.897289276  
C -2.387848616 0.311494231 -7.097754478  
C -3.086185217 1.598971367 -6.628248692  
C -2.127250671 2.474876404 -5.808446407  
C -1.569040418 1.690848351 -4.611568928  
C -0.878379405 0.390941381 -5.059176445  
H -2.676383257 -0.772887290 -5.255209923  
H -3.083114862 -0.296913952 -7.685175419  
H -1.562188506 0.575743258 -7.763071537  
H -3.462494373 2.150804996 -7.498344898  
H -3.961488962 1.340651512 -6.013675213  
H -1.294325709 2.792296886 -6.452405453  
H -0.858519852 2.305402040 -4.044859886  
H -2.391533852 1.446030855 -3.924156427  
H -0.519692302 -0.158023328 -4.183110714  
H -0.000445140 0.641927838 -5.663838863  
H -2.633891582 3.386132240 -5.467216015  
C -2.501533508 -3.180592299 -7.037535191  
C -2.518101454 -3.203931093 -8.586933136  
C -3.567923546 -4.199027061 -9.108871460  
C -4.967633247 -3.900391340 -8.550954819  
C -4.946077824 -3.849917412 -7.016599178  
C -3.906619072 -2.839183331 -6.499553680  
H -2.223985434 -4.182946205 -6.699541569  
H -1.530668855 -3.478956699 -8.967460632  
H -2.744155407 -2.198370218 -8.969502449  
H -3.577160597 -4.180215836 -10.205842972  
H -3.265361071 -5.214375973 -8.816557884  
H -5.310394764 -2.929211855 -8.938305855  
H -5.935761929 -3.583419561 -6.625102043  
H -4.706394196 -4.842044830 -6.612155437  
H -3.919914722 -2.831709385 -5.410664082  
H -4.198310375 -1.836327553 -6.836328506  
H -5.688003063 -4.650432587 -8.900518417  
Pd 0.693790257 -2.301488400 -7.953063488  
Cl 0.587679684 -4.798322201 -7.532275200  
C 0.791322052 -0.347183526 -8.363466263  
C 1.605075955 0.520206630 -7.617548466

C 0.153879076 0.150133699 -9.513359070  
C 1.751097798 1.861917973 -7.992214203  
C 0.304022640 1.489873052 -9.888079643  
C 1.095827341 2.352225065 -9.124176025  
H 2.128040552 0.157632023 -6.735147476  
H -0.473622441 -0.504857242 -10.113658905  
H 2.377946854 2.522669792 -7.396228790  
H -0.203088060 1.860958457 -10.776702881  
H 1.207455635 3.394481659 -9.413122177  
N 2.375974894 -2.463910341 -9.295634270  
H 3.212724209 -2.858456612 -8.836578369  
C -1.525888324 -6.168361187 -4.847415924  
H -0.747141778 -5.503909111 -5.229959965  
C -2.038233995 -6.987733841 -6.043922424  
C -0.869234085 -7.100484848 -3.808915138  
H -0.412487268 -6.531895161 -2.993582964  
H -1.610351563 -7.782283783 -3.374434710  
H -0.085239008 -7.703491211 -4.281184196  
H -2.698245287 -7.805357933 -5.731566906  
H -1.189403057 -7.426474094 -6.577249527  
H -2.587868452 -6.365487576 -6.756286621  
C -3.037771225 -1.853798747 -2.531786680  
H -2.141440630 -1.482472301 -3.038852692  
C -2.725634575 -1.892310619 -1.023139238  
C -4.175413132 -0.858358204 -2.819930077  
H -4.455350876 -0.857768357 -3.878194332  
H -5.075176716 -1.087735772 -2.238932371  
H -3.865543127 0.156871885 -2.549378872  
H -3.579181910 -2.292299271 -0.463780493  
H -2.510549545 -0.886232555 -0.644419491  
H -1.858355761 -2.525699854 -0.815612018  
C -6.269077778 -5.719958782 -3.120345354  
H -6.244880199 -6.739087582 -3.528777599  
C -7.342781544 -4.932894230 -3.894977093  
C -6.629883766 -5.824890137 -1.627247453  
H -5.876865864 -6.399956226 -1.078874350  
H -6.694423676 -4.833285332 -1.164940238  
H -7.600592136 -6.316246510 -1.495700717  
H -7.413640499 -3.902197838 -3.528782845  
H -8.328413010 -5.397703648 -3.777890444  
H -7.106291294 -4.891958714 -4.962714195  
H 2.194263935 -3.121459723 -10.075732231  
C 6.728077412 -5.701439857 -12.516054153  
O 5.646303177 -5.593310833 -11.635895729  
C 1.309252143 -4.507290363 -12.071070671  
O 2.437952518 -4.569076061 -11.227998734  
C 5.191441059 -3.917012691 -7.487771988  
O 4.573225975 -4.225266933 -8.714434624  
C 3.288440228 -8.664090157 -9.206539154  
O 3.639715672 -7.392941952 -9.676860809  
C 6.322191238 -5.187201500 -13.915243149  
C 7.169556141 -7.177871227 -12.633185387  
C 7.917550087 -4.861947060 -11.997211456  
C 1.696920156 -4.956418037 -13.499443054  
C 0.763773620 -3.061738253 -12.157447815  
C 0.189279586 -5.423017502 -11.527011871  
C 5.724901676 -5.207053185 -6.814095497  
C 6.371294975 -2.953119755 -7.733417034

C 4.185668468 -3.259280682 -6.512351513  
C 3.721344233 -8.817466736 -7.730501175  
C 1.757961154 -8.859506607 -9.302113533  
C 3.992567539 -9.747752190 -10.052404404  
H 6.004603386 -4.138539314 -13.852755547  
H 7.138513088 -5.253108025 -14.644667625  
H 5.474859238 -5.769298553 -14.298652649  
H 8.014158249 -7.313669205 -13.319482803  
H 7.465948105 -7.563001156 -11.649265289  
H 6.335522175 -7.793161869 -12.992926598  
H 7.625781536 -3.807409286 -11.909726143  
H 8.216534615 -5.208279133 -10.999717712  
H 8.794398308 -4.917972565 -12.653650284  
H 1.999115705 -6.015771866 -13.514710426  
H 0.866866767 -4.862028599 -14.209550858  
H 2.538748980 -4.356819153 -13.865777969  
H -0.068305753 -2.979644299 -12.866441727  
H 0.399949133 -2.726022482 -11.180164337  
H 1.558269024 -2.378102779 -12.483421326  
H -0.091271922 -5.111356735 -10.514405251  
H -0.708041430 -5.400859833 -12.157916069  
H 0.535454988 -6.463814735 -11.468211174  
H 3.251326561 -8.037097931 -7.119897842  
H 3.448843956 -9.793059349 -7.309264183  
H 4.810318947 -8.705100060 -7.642152309  
H 1.427965999 -8.722862244 -10.339900017  
H 1.439557076 -9.856101036 -8.971273422  
H 1.238221169 -8.115130424 -8.685968399  
H 3.669482946 -9.677712440 -11.099945068  
H 5.078133106 -9.592510223 -10.026510239  
H 3.780153990 -10.765165329 -9.701697350  
H 6.140831947 -5.014655590 -5.818385124  
H 4.920158863 -5.943912029 -6.707229137  
H 6.543436050 -5.656447887 -7.399800777  
H 6.001408100 -2.030123711 -8.196821213  
H 6.900363445 -2.683701992 -6.810631752  
H 7.092164993 -3.409843922 -8.423516273  
H 3.837676287 -2.296215534 -6.904444218  
H 3.306130886 -3.897157431 -6.376035213  
H 4.634675980 -3.071064472 -5.529105663  
Na 5.506824970 -6.211171150 -9.479220390  
Na 4.539931774 -3.799752951 -10.933610916  
Na 2.572306871 -5.501496315 -9.044024467  
Na 3.613520384 -6.539138317 -11.720179558  
H 1.511741042 -1.862030029 -5.525476456  
H 2.833817959 -2.422851563 -3.543695211  
H 1.769933939 -3.705165863 -1.667951226  
H -0.603115976 -4.380383492 -1.867060423  
H 2.587106228 -1.541739464 -9.670175552

=====  
ID'  
=====

C -2.337535143 -4.079064369 -3.816011429  
C -3.283957481 -3.341309547 -3.067920923  
C -4.561563969 -3.876316547 -2.880215168  
C -4.927072048 -5.117578983 -3.410545111  
C -3.974883556 -5.825703621 -4.144148827

C -2.681232929 -5.336925507 -4.359335423  
C -0.914588332 -3.607444048 -3.880506754  
C -0.327785760 -2.808116436 -4.885416508  
C 1.042479873 -2.497987032 -4.769465923  
C 1.822629333 -2.937675953 -3.707472801  
C 1.241158605 -3.723071814 -2.714983225  
C -0.106547110 -4.046782494 -2.814768076  
H -5.291884899 -3.311800957 -2.307725191  
H -4.249580383 -6.792391300 -4.558117390  
P -1.098611355 -2.024763346 -6.385572910  
C -1.766594529 -0.394971192 -5.730653763  
C -2.300850153 0.505089045 -6.865715027  
C -2.914091587 1.798810005 -6.303983212  
C -1.893611670 2.564462185 -5.448821545  
C -1.370092034 1.675891995 -4.310719013  
C -0.755862534 0.373448908 -4.851875782  
H -2.611142635 -0.685296297 -5.093139648  
H -3.042529345 -0.027429411 -7.470232487  
H -1.475430369 0.762384593 -7.533917904  
H -3.269698143 2.424531937 -7.131684303  
H -3.793995619 1.553860903 -5.690494537  
H -1.050210953 2.870263815 -6.084758759  
H -0.620726943 2.212025166 -3.715198040  
H -2.198905706 1.433107972 -3.629998446  
H -0.415822417 -0.250887215 -4.019897461  
H 0.125985160 0.619446397 -5.451450825  
H -2.340421915 3.481526136 -5.045332432  
C -2.595028877 -2.981164932 -7.024823189  
C -2.669420481 -2.910293579 -8.570980072  
C -3.780922890 -3.824483633 -9.111597061  
C -5.144772053 -3.495547295 -8.487360954  
C -5.067146778 -3.537127972 -6.954904079  
C -3.963507652 -2.608243704 -6.418056011  
H -2.353978157 -4.013090134 -6.755437374  
H -1.712048650 -3.204625130 -9.008271217  
H -2.862961054 -1.874172688 -8.883324623  
H -3.823491573 -3.739172697 -10.204496384  
H -3.516961336 -4.868019104 -8.890123367  
H -5.452974319 -2.488369465 -8.805645943  
H -6.028092384 -3.248025894 -6.511908054  
H -4.861415863 -4.561537743 -6.617838383  
H -3.941195726 -2.666581631 -5.330999851  
H -4.217434406 -1.574738145 -6.685550213  
H -5.912526131 -4.189457893 -8.851576805  
Pd 0.571100652 -2.195236683 -8.014273643  
Cl 0.363028407 -4.739481926 -7.742544651  
C 0.890068769 -0.219136000 -8.161977768  
C 1.770198226 0.437198907 -7.287728786  
C 0.350329280 0.505825579 -9.235986710  
C 2.091172218 1.787294984 -7.473788261  
C 0.673454463 1.853688002 -9.421208382  
C 1.538727283 2.503635883 -8.536599159  
H 2.220320702 -0.094614901 -6.453707695  
H -0.317774981 0.017622070 -9.940596581  
H 2.773844481 2.276307821 -6.782042980  
H 0.248283595 2.395960331 -10.262605667  
H 1.787069440 3.551520586 -8.681250572  
N 2.122986794 -2.563635826 -9.576710701

H 2.926547289 -2.970276356 -9.051422119  
C -1.662678957 -6.182599545 -5.119965076  
H -0.870914340 -5.521385193 -5.480263233  
C -2.251115799 -6.883599758 -6.356816292  
C -1.009777427 -7.219054699 -4.183157444  
H -0.501550972 -6.736211777 -3.343440056  
H -1.762966633 -7.904211044 -3.775719404  
H -0.268500954 -7.812915802 -4.730471611  
H -2.935497046 -7.695708275 -6.084786892  
H -1.441149235 -7.312679291 -6.954421997  
H -2.795772076 -6.184702873 -6.998262405  
C -2.922161102 -1.991686583 -2.450555086  
H -2.035294294 -1.615682840 -2.970171928  
C -2.544414282 -2.154002905 -0.966329336  
C -4.029332638 -0.935445786 -2.610746145  
H -4.357987881 -0.846455395 -3.651107311  
H -4.909625053 -1.171603799 -2.003324032  
H -3.664429903 0.044532947 -2.284567833  
H -3.386482000 -2.565808058 -0.398636580  
H -2.275338650 -1.187075019 -0.525619566  
H -1.693039060 -2.830125332 -0.848201990  
C -6.327309132 -5.678884029 -3.210540533  
H -6.349865437 -6.672847748 -3.677066565  
C -7.383730888 -4.808950424 -3.916987181  
C -6.664048672 -5.856422424 -1.719047546  
H -5.922689915 -6.488476753 -1.219744563  
H -6.684383392 -4.891639233 -1.199540854  
H -7.649399281 -6.319953918 -1.596426129  
H -7.403699398 -3.797645569 -3.494713306  
H -8.384904861 -5.239726067 -3.802083015  
H -7.168243408 -4.720047474 -4.985972404  
H 1.786312938 -3.360691786 -10.144180298  
C 6.703493118 -5.511965752 -12.419353485  
O 5.594040871 -5.512651920 -11.566750526  
C 1.149181128 -5.229553699 -12.012481689  
O 2.247063398 -4.985088348 -11.165176392  
C 5.012558460 -3.639355421 -7.576315403  
O 4.347908974 -4.096003056 -8.731840134  
C 3.745727777 -8.687354088 -8.838294029  
O 3.863429546 -7.408044815 -9.392299652  
C 6.294209957 -4.989994526 -13.814002991  
C 7.260526180 -6.945898533 -12.561825752  
C 7.810196400 -4.599116802 -11.844390869  
C 1.454704762 -4.698227882 -13.429947853  
C -0.134071633 -4.558489323 -11.467361450  
C 0.859161496 -6.750698090 -12.104510307  
C 5.565453053 -4.831713200 -6.752084732  
C 6.190805912 -2.725093842 -7.972454548  
C 4.035998344 -2.865709066 -6.663092613  
C 4.014652252 -8.629819870 -7.317485332  
C 2.321481705 -9.237286568 -9.076796532  
C 4.770538807 -9.640793800 -9.492461205  
H 5.917847157 -3.961806536 -13.736835480  
H 7.126135826 -4.993383408 -14.528555870  
H 5.487662315 -5.611128807 -14.221913338  
H 8.146690369 -6.993976116 -13.206275940  
H 7.532808781 -7.343494892 -11.576147079  
H 6.495022774 -7.607162476 -12.987157822

H 7.426342487 -3.580241203 -11.710357666  
H 8.130361557 -4.966455460 -10.860473633  
H 8.695720673 -4.549412251 -12.489420891  
H 2.343508959 -5.196866512 -13.839375496  
H 0.623130322 -4.855570316 -14.127626419  
H 1.673508525 -3.626598835 -13.390563965  
H -1.006605506 -4.772211552 -12.096491814  
H -0.335935622 -4.909680843 -10.451053619  
H -0.024159973 -3.469938755 -11.420870781  
H 0.715938807 -7.172691822 -11.104061127  
H -0.036706310 -6.965213299 -12.698596954  
H 1.683013678 -7.293647766 -12.595561981  
H 3.307558298 -7.943259716 -6.835943699  
H 3.921348095 -9.609953880 -6.833982944  
H 5.027662754 -8.252754211 -7.128082275  
H 2.107900381 -9.271606445 -10.152311325  
H 2.185276270 -10.246539116 -8.668993950  
H 1.578937888 -8.578083038 -8.610229492  
H 4.588420391 -9.706751823 -10.572888374  
H 5.787230968 -9.253426552 -9.349243164  
H 4.730494022 -10.656028748 -9.079195976  
H 5.994641781 -4.506099224 -5.797428608  
H 4.770344257 -5.554441929 -6.538683891  
H 6.379801273 -5.354376793 -7.279385567  
H 5.825997829 -1.871380925 -8.551486015  
H 6.736570358 -2.343262196 -7.100978374  
H 6.899362564 -3.272128105 -8.607710838  
H 3.652812481 -1.971950412 -7.165570736  
H 3.178364515 -3.498654604 -6.415265560  
H 4.513074875 -2.540889502 -5.729853630  
Na 5.545286655 -5.975886822 -9.379563332  
Na 4.229082108 -3.825503826 -11.041572571  
Na 2.533731937 -5.632735252 -8.903862000  
Na 3.725595951 -6.742018700 -11.516122818  
C 2.571838617 -1.509084344 -10.426321030  
C 3.582573175 -0.639874160 -9.990342140  
C 1.999927282 -1.310642123 -11.689834595  
C 4.017462730 0.400216192 -10.809016228  
C 2.444154501 -0.270425349 -12.507227898  
C 3.455771446 0.588692725 -12.074597359  
H 3.990951300 -0.761029482 -8.994753838  
H 1.199901342 -1.961694002 -12.020325661  
H 4.788067341 1.075280666 -10.447207451  
H 1.988056898 -0.128624365 -13.483344078  
H 3.793105841 1.403623700 -12.708259583  
H 1.512689829 -1.911328435 -5.549690723  
H 2.876757622 -2.679194689 -3.671293259  
H 1.829154372 -4.088414192 -1.877468944  
H -0.566936731 -4.668520927 -2.053281069

=====  
1D-TS  
=====

O 1.738351226 -0.070771627 -10.189044952  
H 2.364484787 -1.817859650 -9.213747025  
C 0.525557101 -7.013738155 -3.375170469  
C -0.428847164 -6.959801197 -2.333568811  
C -1.425321341 -7.937941074 -2.270042658

|    |              |              |              |   |              |               |               |
|----|--------------|--------------|--------------|---|--------------|---------------|---------------|
| C  | -1.499436617 | -8.977745056 | -3.199523687 | H | 6.123904705  | -7.022186756  | -7.473556519  |
| C  | -0.531321645 | -9.027137756 | -4.203850269 | N | 2.269958973  | -2.835875273  | -9.284945488  |
| C  | 0.482681841  | -8.069388390 | -4.316686630 | H | 1.459056973  | -3.081100941  | -10.333562851 |
| C  | 1.683848381  | -6.050248623 | -3.376082659 | C | 1.529993296  | -8.192096710  | -5.421038151  |
| C  | 1.823671103  | -4.857097149 | -4.127340317 | H | 1.860738397  | -7.182217121  | -5.680706024  |
| C  | 3.049657345  | -4.166923046 | -4.038114548 | C | 0.996751904  | -8.850937843  | -6.704759598  |
| C  | 4.082217693  | -4.567350388 | -3.198987961 | C | 2.774010181  | -8.959588051  | -4.931030273  |
| C  | 3.924402475  | -5.711963177 | -2.419826269 | H | 3.225479841  | -8.478217125  | -4.061193466  |
| C  | 2.742875814  | -6.437144279 | -2.529823303 | H | 2.507844687  | -9.987134933  | -4.656474590  |
| H  | -2.164561033 | -7.884763241 | -1.475623012 | H | 3.530103683  | -8.996550560  | -5.722971916  |
| H  | -0.580462515 | -9.835292816 | -4.927708149 | H | 0.831308186  | -9.925741196  | -6.569618225  |
| P  | 0.625056684  | -3.966089249 | -5.237434387 | H | 1.729231477  | -8.740192413  | -7.510200977  |
| C  | 0.285072833  | -2.354466677 | -4.323983192 | H | 0.053946037  | -8.407214165  | -7.037343979  |
| C  | 1.331224084  | -1.249499798 | -4.581482410 | C | -0.399310112 | -5.853935719  | -1.282977700  |
| C  | 0.850663722  | 0.084372349  | -3.985862255 | H | 0.288680375  | -5.081035137  | -1.634644270  |
| C  | 0.569373190  | -0.046560351 | -2.480179310 | C | 0.152760401  | -6.380696297  | 0.054536499   |
| C  | -0.432287902 | -1.178223014 | -2.199431896 | C | -1.776536822 | -5.195882320  | -1.080698252  |
| C  | 0.031413361  | -2.510723829 | -2.815453768 | H | -2.222638845 | -4.895720005  | -2.034083605  |
| H  | -0.636335254 | -2.022486448 | -4.816417217 | H | -2.481197834 | -5.872319221  | -0.584804773  |
| H  | 1.505726814  | -1.141284704 | -5.655151367 | H | -1.683809161 | -4.303678036  | -0.451326430  |
| H  | 2.286255598  | -1.518693924 | -4.112469673 | H | -0.476999849 | -7.189299107  | 0.442618549   |
| H  | 1.600613475  | 0.863574207  | -4.170399189 | H | 0.181257173  | -5.581842422  | 0.804648459   |
| H  | -0.064358041 | 0.397351474  | -4.508077145 | H | 1.168172359  | -6.770745754  | -0.064098425  |
| H  | 1.512283325  | -0.264710635 | -1.956940055 | C | -2.621958494 | -10.003678322 | -3.152219296  |
| H  | -0.581935942 | -1.300577998 | -1.119074941 | H | -2.425347805 | -10.739374161 | -3.943876982  |
| H  | -1.410238028 | -0.910714447 | -2.625165701 | C | -3.980935097 | -9.343142509  | -3.456990957  |
| H  | -0.716705322 | -3.283541918 | -2.625452518 | C | -2.660766363 | -10.761705399 | -1.813979268  |
| H  | 0.959451318  | -2.838940620 | -2.328056097 | H | -1.701064229 | -11.246311188 | -1.607478619  |
| H  | 0.196100205  | 0.901664376  | -2.073919296 | H | -2.880736589 | -10.085809708 | -0.979935825  |
| C  | -0.998993397 | -4.911236286 | -5.249580383 | H | -3.438833714 | -11.533304214 | -1.828710794  |
| C  | -1.095552564 | -5.726184368 | -6.556135654 | H | -4.234065056 | -8.600679398  | -2.691357136  |
| C  | -2.313361645 | -6.661270618 | -6.538950920 | H | -4.783106804 | -10.090004921 | -3.478343725  |
| C  | -3.608706474 | -5.870589733 | -6.297164440 | H | -3.962366581 | -8.830312729  | -4.424435616  |
| C  | -3.504393578 | -5.017582893 | -5.022468090 | C | 2.126463890  | -0.363415986  | -14.762669563 |
| C  | -2.283776760 | -4.077229500 | -5.060173988 | O | 1.635715365  | -0.661486804  | -13.485395432 |
| H  | -0.939721227 | -5.610784054 | -4.415275574 | C | 2.288229704  | 0.947770774   | -9.396373749  |
| H  | -0.176305458 | -6.296334267 | -6.717591286 | C | 0.377967834  | -4.501989841  | -11.447694778 |
| H  | -1.181200385 | -5.021260738 | -7.391416550 | O | 0.772486806  | -3.130578518  | -11.276296616 |
| H  | -2.372019291 | -7.212671280 | -7.486813545 | C | -2.549504042 | 0.107449993   | -11.904832840 |
| H  | -2.181797504 | -7.407373905 | -5.743714333 | O | -1.216187358 | -0.320795715  | -11.849682808 |
| H  | -3.793083668 | -5.209052086 | -7.155986309 | C | 2.957283258  | 0.938017726   | -14.713359833 |
| H  | -4.418926716 | -4.427865028 | -4.882286549 | C | 0.953188658  | -0.169630766  | -15.750389099 |
| H  | -3.419173002 | -5.684424400 | -4.151074409 | C | 3.022772074  | -1.515203476  | -15.267287254 |
| H  | -2.247161388 | -3.499879599 | -4.130658150 | C | 3.808812141  | 1.042046070   | -9.648390770  |
| H  | -2.385064840 | -3.361254215 | -5.883236408 | C | 2.042231321  | 0.654899120   | -7.899304390  |
| H  | -4.466796398 | -6.551643848 | -6.229356766 | C | 1.637461424  | 2.311273098   | -9.741908073  |
| Pd | 1.436947823  | -3.421683788 | -7.386547565 | C | -0.631932318 | -4.874337196  | -10.352986336 |
| Cl | -0.772903264 | -1.971973062 | -7.606881142 | C | -0.275065690 | -4.646428585  | -12.832416534 |
| C  | 3.021055222  | -4.642251492 | -7.317636967 | C | 1.623417020  | -5.402134418  | -11.370244980 |
| C  | 2.883396864  | -5.978480339 | -7.725489140 | C | -3.498696566 | -1.108813286  | -11.814997673 |
| C  | 4.304981709  | -4.173648834 | -6.993883133 | C | -2.845821142 | 1.064523935   | -10.727942467 |
| C  | 3.994861603  | -6.828088760 | -7.783498287 | C | -2.804762363 | 0.848681509   | -13.235486984 |
| C  | 5.412616253  | -5.026837349 | -7.044063091 | H | 3.763322353  | 0.835605800   | -13.977156639 |
| C  | 5.262941360  | -6.360373974 | -7.433175087 | H | 3.404488087  | 1.193637729   | -15.681406975 |
| H  | 1.907497406  | -6.362482071 | -8.009100914 | H | 2.322861671  | 1.780411482   | -14.406371117 |
| H  | 4.448049545  | -3.135657072 | -6.703256607 | H | 1.287770152  | 0.125984043   | -16.751867294 |
| H  | 3.866441965  | -7.859739304 | -8.104550362 | H | 0.383786172  | -1.103812456  | -15.854746819 |
| H  | 6.396625519  | -4.644390583 | -6.780552864 | H | 0.270115137  | 0.600557327   | -15.373228073 |

|    |              |              |               |    |              |              |               |
|----|--------------|--------------|---------------|----|--------------|--------------|---------------|
| H  | 3.887528419  | -1.640648365 | -14.601959229 | C  | -1.752176404 | -0.393810898 | -5.781864643  |
| H  | 2.455547571  | -2.454132557 | -15.265189171 | C  | -2.223213673 | 0.457771629  | -6.980622768  |
| H  | 3.401741266  | -1.344670296 | -16.282100677 | C  | -2.889721632 | 1.759308815  | -6.504697800  |
| H  | 3.999722719  | 1.240957737  | -10.711637497 | C  | -1.933038950 | 2.572094917  | -5.619560719  |
| H  | 4.290544033  | 1.832788587  | -9.060578346  | C  | -1.461685061 | 1.733479381  | -4.422080040  |
| H  | 4.284120560  | 0.088177450  | -9.386668205  | C  | -0.802097917 | 0.420583755  | -4.878241062  |
| H  | 2.443165302  | 1.444176316  | -7.250878334  | H  | -2.632602930 | -0.665680408 | -5.185834408  |
| H  | 0.970997334  | 0.547486007  | -7.699342728  | H  | -2.915836573 | -0.106855378 | -7.613502502  |
| H  | 2.517434359  | -0.291641057 | -7.618886471  | H  | -1.360618949 | 0.705366671  | -7.603536129  |
| H  | 0.547177732  | 2.244440317  | -9.630761147  | H  | -3.204087257 | 2.349458933  | -7.374271393  |
| H  | 1.990118861  | 3.123940229  | -9.096267700  | H  | -3.801258087 | 1.521467686  | -5.936042786  |
| H  | 1.878598928  | 2.607741594  | -10.775860786 | H  | -1.059775949 | 2.870449066  | -6.217499256  |
| H  | -3.315534830 | -1.662253499 | -10.886340141 | H  | -0.753470302 | 2.302877665  | -3.807264328  |
| H  | -4.556731701 | -0.820693493 | -11.838766098 | H  | -2.323677301 | 1.504073381  | -3.779276371  |
| H  | -3.318423033 | -1.791077256 | -12.657253265 | H  | -0.499754548 | -0.166973799 | -4.005632401  |
| H  | -2.162607670 | 1.922776699  | -10.763737679 | H  | 0.108179383  | 0.656545699  | -5.438400269  |
| H  | -3.873658180 | 1.447344422  | -10.745948792 | H  | -2.416491508 | 3.494619370  | -5.274895191  |
| H  | -2.692377329 | 0.551827312  | -9.770322800  | C  | -2.486842155 | -3.031583786 | -7.011168003  |
| H  | -2.148434401 | 1.725405812  | -13.309823036 | C  | -2.470452309 | -3.004770041 | -8.560771942  |
| H  | -2.577272415 | 0.189342484  | -14.082690239 | C  | -3.541503668 | -3.943048239 | -9.140190125  |
| H  | -3.841608047 | 1.191563129  | -13.337260246 | C  | -4.942108631 | -3.608283043 | -8.606242180  |
| H  | -0.952323854 | -5.919040680 | -10.440930367 | C  | -4.954628944 | -3.607906103 | -7.070747852  |
| H  | -0.182774574 | -4.728896618 | -9.367564201  | C  | -3.891731977 | -2.652831078 | -6.497418880  |
| H  | -1.517016530 | -4.230772018 | -10.412322998 | H  | -2.253209114 | -4.053109169 | -6.698744297  |
| H  | 0.414639175  | -4.319611073 | -13.623043060 | H  | -1.486339092 | -3.300078154 | -8.931127548  |
| H  | -0.541515470 | -5.687756538 | -13.038974762 | H  | -2.652498484 | -1.980043173 | -8.914037704  |
| H  | -1.210268497 | -4.069705963 | -12.888387680 | H  | -3.520203114 | -3.888128281 | -10.235713005 |
| H  | 2.352258444  | -5.105367661 | -12.135197639 | H  | -3.284059048 | -4.978088856 | -8.875308990  |
| H  | 2.098942280  | -5.322726727 | -10.388825417 | H  | -5.237070560 | -2.612210989 | -8.968867302  |
| H  | 1.362506866  | -6.453204155 | -11.537050247 | H  | -5.943073273 | -3.317938566 | -6.692888737  |
| Na | -0.183871225 | -1.863811612 | -13.030068398 | H  | -4.760626793 | -4.620626450 | -6.693988800  |
| Na | 2.566554546  | -1.567722201 | -11.700222015 | H  | -3.933967113 | -2.676459551 | -5.409458637  |
| Na | -0.276666254 | -1.183814168 | -9.990063667  | H  | -4.136280537 | -1.630353570 | -6.812155724  |
| Na | 0.697933793  | 0.796318829  | -12.026136398 | H  | -5.682497501 | -4.317683697 | -8.996485710  |
| H  | 3.200107336  | -3.294986963 | -4.661514282  | Pd | 0.727074087  | -2.263288021 | -7.867126465  |
| H  | 5.004447460  | -3.993988514 | -3.167342663  | Cl | 0.544698060  | -4.822817326 | -7.473733902  |
| H  | 4.713396072  | -6.048889637 | -1.753314495  | C  | 0.960422456  | -0.297427475 | -8.142962456  |
| H  | 2.616318226  | -7.348233223 | -1.951507092  | C  | 1.763928652  | 0.467884898  | -7.285490990  |
| H  | 3.202691555  | -3.244411230 | -9.320165634  | C  | 0.432936549  | 0.311966389  | -9.292562485  |

=====  
ID'-TS  
=====

|   |              |              |              |   |              |              |               |
|---|--------------|--------------|--------------|---|--------------|--------------|---------------|
| C | -2.413928032 | -4.006400585 | -3.752634525 | H | -0.176750466 | -0.265793234 | -9.982067108  |
| C | -3.382981062 | -3.233500957 | -3.070535898 | H | 2.662647724  | 2.388594151  | -6.895427704  |
| C | -4.671545982 | -3.751325130 | -2.914778709 | H | 0.291239709  | 2.106635332  | -10.473926544 |
| C | -5.028168201 | -5.007515430 | -3.415147543 | H | 1.710243821  | 3.452518702  | -8.933813095  |
| C | -4.054670811 | -5.749241829 | -4.084138393 | N | 2.262460232  | -2.642867565 | -9.412207603  |
| C | -2.748379707 | -5.279583931 | -4.262448788 | H | 3.227298021  | -3.315093040 | -8.919839859  |
| C | -0.985122740 | -3.547288179 | -3.768545389 | C | -1.707870483 | -6.158855438 | -4.949803829  |
| C | -0.352288544 | -2.761876345 | -4.756316185 | H | -0.890471637 | -5.519172668 | -5.290504932  |
| C | 1.006768227  | -2.434515476 | -4.573233604 | C | -2.246533871 | -6.888323784 | -6.192284584  |
| C | 1.733639836  | -2.848281384 | -3.464360237 | C | -1.114841700 | -7.176303864 | -3.954901695  |
| C | 1.109536648  | -3.627333164 | -2.492861748 | H | -0.640167892 | -6.675782204 | -3.106024504  |
| C | -0.229170665 | -3.965010405 | -2.656233311 | H | -1.895962238 | -7.839799404 | -3.564524651  |
| H | -5.417994499 | -3.160998583 | -2.391224384 | H | -0.356936574 | -7.794823170 | -4.449351311  |
| H | -4.322047234 | -6.727571011 | -4.474789143 | H | -2.955884695 | -7.681820393 | -5.930305481  |
| P | -1.032987237 | -2.042033911 | -6.328931808 | H | -1.414744377 | -7.347143650 | -6.735593319  |

H -2.748519182 -6.201560974 -6.879688263  
C -3.035694599 -1.864234924 -2.488747358  
H -2.129643917 -1.510568976 -2.990371466  
C -2.711335897 -1.972820401 -0.986054778  
C -4.131646156 -0.811609328 -2.728156090  
H -4.420127392 -0.759910047 -3.782907486  
H -5.035256386 -1.023010612 -2.146320581  
H -3.775329113 0.178313121 -2.423829794  
H -3.574767351 -2.360174417 -0.432990372  
H -2.452488661 -0.991099060 -0.572500467  
H -1.867912650 -2.647304296 -0.812832177  
C -6.440013885 -5.548837185 -3.245031834  
H -6.468311787 -6.541453362 -3.713928461  
C -7.472380161 -4.662917614 -3.967139244  
C -6.804551125 -5.723655224 -1.759269118  
H -6.084652901 -6.372481823 -1.250091791  
H -6.810798645 -4.759231567 -1.238517523  
H -7.801608562 -6.165863037 -1.652621508  
H -7.497925758 -3.656306028 -3.534094095  
H -8.478960037 -5.088227272 -3.882306814  
H -7.229344845 -4.562469959 -5.029560089  
H 1.743593693 -3.321985483 -9.975944519  
C 6.509728909 -5.196355343 -12.611606598  
O 5.428153038 -5.301424503 -11.727336884  
C 0.932962775 -5.327541351 -11.943113327  
O 2.134048939 -5.145985126 -11.234666824  
C 4.874979019 -3.726185083 -7.476114750  
O 4.144029140 -4.090787411 -8.652624130  
C 3.983499050 -8.720944405 -9.078851700  
O 3.926831245 -7.410851479 -9.569464684  
C 6.114299297 -4.325713158 -13.825282097  
C 6.918577671 -6.599171638 -13.110859871  
C 7.712321758 -4.543284416 -11.895434380  
C 1.087296247 -4.810907364 -13.391286850  
C -0.235068157 -4.582099915 -11.255941391  
C 0.564472735 -6.831206799 -11.993635178  
C 5.327776909 -5.005607605 -6.743857861  
C 6.107418537 -2.898595572 -7.886411190  
C 3.981031418 -2.925010443 -6.514594078  
C 4.195685863 -8.704634666 -7.548784733  
C 2.662757158 -9.459548950 -9.394051552  
C 5.155335426 -9.482245445 -9.739826202  
H 5.880465031 -3.303203821 -13.499364853  
H 6.909253120 -4.260542870 -14.577878952  
H 5.220250607 -4.743591309 -14.303476334  
H 7.795465469 -6.575900078 -13.768942833  
H 7.144848347 -7.246508598 -12.255258560  
H 6.091793537 -7.055353642 -13.671871185  
H 7.412984371 -3.572915554 -11.481690407  
H 8.048909187 -5.178415298 -11.064414978  
H 8.569280624 -4.385558605 -12.561291695  
H 1.899936199 -5.345288277 -13.901349068  
H 0.172804087 -4.937810898 -13.983165741  
H 1.345222592 -3.746375084 -13.388870239  
H -1.189516664 -4.744154930 -11.771620750  
H -0.338755637 -4.918954372 -10.219746590  
H -0.053725950 -3.501652718 -11.234137535  
H 0.480473936 -7.239324570 -10.980257034

H -0.383332521 -7.012831688 -12.514020920  
H 1.335450530 -7.408185005 -12.527402878  
H 3.381817579 -8.153184891 -7.062337399  
H 4.231687069 -9.712189674 -7.116711140  
H 5.135708809 -8.194859505 -7.303998470  
H 2.486772537 -9.473519325 -10.477228165  
H 2.662257433 -10.496172905 -9.035531998  
H 1.818121076 -8.937767982 -8.927466393  
H 5.022948265 -9.509456635 -10.829273224  
H 6.103190422 -8.968727112 -9.532608986  
H 5.244584560 -10.515853882 -9.383777618  
H 5.834378719 -4.760721207 -5.803840160  
H 4.469596386 -5.645063877 -6.517906189  
H 6.048130512 -5.596109390 -7.328864098  
H 5.799398422 -2.002551794 -8.431227684  
H 6.698320866 -2.590969324 -7.015823841  
H 6.763252735 -3.475830317 -8.552128792  
H 3.651988745 -1.985185623 -6.965638161  
H 3.089625835 -3.507310390 -6.266467094  
H 4.518043041 -2.687245846 -5.588907242  
Na 5.437772751 -5.804457188 -9.577645302  
Na 3.908250570 -3.751223564 -11.307272911  
Na 2.393062830 -5.829129696 -9.001095772  
Na 3.682677269 -6.746351719 -11.694731712  
C 2.717835665 -1.603792191 -10.248784065  
C 3.694387913 -0.699190736 -9.789208412  
C 2.248270750 -1.454674602 -11.569860458  
C 4.179809570 0.306243300 -10.619232178  
C 2.747305155 -0.448405951 -12.400579453  
C 3.717494488 0.437720478 -11.933384895  
H 4.023619652 -0.766247690 -8.760105133  
H 1.465044260 -2.115449905 -11.927416801  
H 4.915364742 1.005666137 -10.230857849  
H 2.359344006 -0.352055311 -13.411672592  
H 4.096478462 1.228674889 -12.573676109  
H 1.509994149 -1.853476524 -5.337795734  
H 2.781178236 -2.575503111 -3.374144077  
H 1.656704068 -3.974033833 -1.620459080  
H -0.727284312 -4.573766232 -1.907118917

=====  
1E  
=====

O 1.273216605 0.424817175 -10.254626274  
H 1.995990634 -1.559116006 -9.134520531  
C 0.659753740 -7.047369957 -3.621058464  
C -0.176368237 -7.049017906 -2.480557442  
C -1.167624474 -8.026982307 -2.364626408  
C -1.351963997 -9.009368896 -3.340307236  
C -0.501175404 -9.001786232 -4.446546078  
C 0.503894448 -8.042490959 -4.613951206  
C 1.811327815 -6.079947948 -3.688987017  
C 1.856941104 -4.827665806 -4.345861435  
C 3.071227074 -4.112824440 -4.319337368  
C 4.193841457 -4.560435772 -3.636438131  
C 4.138401031 -5.778076172 -2.962136745  
C 2.963228703 -6.517917633 -3.005231380  
H -1.815934062 -8.019029617 -1.492836714

|    |              |              |               |   |              |               |               |
|----|--------------|--------------|---------------|---|--------------|---------------|---------------|
| H  | -0.638077617 | -9.764841080 | -5.206955433  | H | 0.578679264  | -9.762215614  | -6.990446091  |
| P  | 0.549540102  | -3.897054911 | -5.283084393  | H | 1.383546710  | -8.532114983  | -7.957962513  |
| C  | 0.311573297  | -2.316136122 | -4.281714916  | H | -0.226566896 | -8.215553284  | -7.287657738  |
| C  | 1.295392394  | -1.179615736 | -4.634788513  | C | -0.019889515 | -6.002487183  | -1.380902171  |
| C  | 0.880734384  | 0.120830670  | -3.926221609  | H | 0.613473952  | -5.201901436  | -1.772001624  |
| C  | 0.810684264  | -0.072171934 | -2.402741909  | C | 0.697761953  | -6.595521450  | -0.153939620  |
| C  | -0.131712377 | -1.229029417 | -2.034019470  | C | -1.362671852 | -5.369753361  | -0.973539710  |
| C  | 0.259210438  | -2.529870033 | -2.758325338  | H | -1.920139790 | -5.015703678  | -1.846695065  |
| H  | -0.670411766 | -1.984750152 | -4.638853550  | H | -2.002451420 | -6.079673290  | -0.438022524  |
| H  | 1.322111011  | -1.028377056 | -5.717287064  | H | -1.193849683 | -4.516587734  | -0.307018667  |
| H  | 2.309607983  | -1.442567706 | -4.308821678  | H | 0.126933575  | -7.434013844  | 0.261260241   |
| H  | 1.587192059  | 0.920822203  | -4.180431366  | H | 0.812916338  | -5.840073109  | 0.631807983   |
| H  | -0.101703554 | 0.435534507  | -4.305441380  | H | 1.693307757  | -6.963462830  | -0.419497550  |
| H  | 1.818690419  | -0.296289086 | -2.022881985  | C | -2.471139431 | -10.033639908 | -3.228464603  |
| H  | -0.132834196 | -1.394313335 | -0.949033856  | H | -2.378271341 | -10.714649200 | -4.085205555  |
| H  | -1.160864592 | -0.960824013 | -2.313395023  | C | -3.849277496 | -9.350556374  | -3.322970390  |
| H  | -0.448844552 | -3.321915865 | -2.501030684  | C | -2.356833220 | -10.879026413 | -1.947679639  |
| H  | 1.246049166  | -2.862466097 | -2.409267902  | H | -1.384208679 | -11.378323555 | -1.890342832  |
| H  | 0.487926930  | 0.853755891  | -1.910825968  | H | -2.467262983 | -10.258811951 | -1.050998807  |
| C  | -1.074010015 | -4.838489056 | -5.158709526  | H | -3.138824940 | -11.646179199 | -1.918280959  |
| C  | -1.328697681 | -5.566602230 | -6.494645596  | H | -3.999623299 | -8.657366753  | -2.487381220  |
| C  | -2.548015594 | -6.494449139 | -6.401036739  | H | -4.656306267 | -10.091656685 | -3.293832302  |
| C  | -3.797375917 | -5.712946892 | -5.966366768  | H | -3.942005157 | -8.776783943  | -4.251258850  |
| C  | -3.540273905 | -4.945370674 | -4.659688473  | C | 1.996059656  | -0.480444163  | -14.605583191 |
| C  | -2.318755388 | -4.011730671 | -4.772701740  | O | 1.304845691  | -0.639851093  | -13.398267746 |
| H  | -0.926389933 | -5.587808132 | -4.380175114  | C | 1.826593041  | 1.383538485   | -9.391910553  |
| H  | -0.440538824 | -6.128897667 | -6.796170235  | C | -0.269388884 | -4.357728481  | -11.318523407 |
| H  | -1.500136375 | -4.807944298 | -7.266421318  | O | 0.107639596  | -2.975897312  | -11.199472427 |
| H  | -2.718445778 | -6.982346535 | -7.369830608  | C | -2.961184263 | 0.179838702   | -11.962758064 |
| H  | -2.338522911 | -7.291254044 | -5.675283909  | O | -1.613439322 | -0.184294134  | -11.863608360 |
| H  | -4.066542149 | -4.995976925 | -6.755202293  | C | 2.776053905  | 0.854189634   | -14.601692200 |
| H  | -4.425675869 | -4.361299038 | -4.379326344  | C | 1.001839757  | -0.471269459  | -15.789188385 |
| H  | -3.365613699 | -5.667432308 | -3.847717047  | C | 2.993372202  | -1.644847155  | -14.801247597 |
| H  | -2.172223091 | -3.499027252 | -3.816492558  | C | 3.254308224  | 1.744837523   | -9.860351563  |
| H  | -2.502104044 | -3.242398500 | -5.532176495  | C | 1.893983483  | 0.850010276   | -7.941449642  |
| H  | -4.652511120 | -6.390575886 | -5.846694946  | C | 0.957079589  | 2.662964106   | -9.399567604  |
| Pd | 1.154261947  | -3.270893574 | -7.467667103  | C | -0.982742786 | -4.803289890  | -10.036572456 |
| Cl | -1.022177696 | -1.781508923 | -7.481306076  | C | -1.224311352 | -4.465825558  | -12.515345573 |
| C  | 2.715010881  | -4.517403126 | -7.610923767  | C | 0.992921650  | -5.198971272  | -11.566980362 |
| C  | 2.515127659  | -5.799511433 | -8.145893097  | C | -3.546935081 | -0.314319849  | -13.306985855 |
| C  | 4.032102108  | -4.097667217 | -7.362141609  | C | -3.771101236 | -0.454339057  | -10.809143066 |
| C  | 3.599494934  | -6.644623756 | -8.406826019  | C | -3.101259232 | 1.716689467   | -11.890394211 |
| C  | 5.114619732  | -4.946876526 | -7.614090919  | H | 3.450073004  | 0.891676128   | -13.736994743 |
| C  | 4.902629375  | -6.224858761 | -8.135299683  | H | 3.373800039  | 0.998142183   | -15.509757996 |
| H  | 1.510173202  | -6.145515442 | -8.369022369  | H | 2.080222130  | 1.700817943   | -14.523039818 |
| H  | 4.221714973  | -3.098986149 | -6.976858139  | H | 1.490666628  | -0.298226565  | -16.755353928 |
| H  | 3.423240423  | -7.633163929 | -8.825651169  | H | 0.478461266  | -1.435611725  | -15.851559639 |
| H  | 6.126554966  | -4.604837418 | -7.406785488  | H | 0.252327442  | 0.315322191   | -15.637749672 |
| H  | 5.744061470  | -6.883430958 | -8.334466934  | H | 3.752785921  | -1.633867264  | -14.006868362 |
| N  | 1.874085665  | -2.546046019 | -9.374220848  | H | 2.459506512  | -2.600850582  | -14.744480133 |
| H  | 0.831910670  | -2.877040863 | -10.429497719 | H | 3.519625425  | -1.598288536  | -15.762304306 |
| C  | 1.419530272  | -8.097916603 | -5.834166527  | H | 3.229665518  | 2.105385065   | -10.896707535 |
| H  | 1.722082853  | -7.073363304 | -6.070059776  | H | 3.723955393  | 2.517068863   | -9.238819122  |
| C  | 0.741516590  | -8.682686806 | -7.084975719  | H | 3.895704269  | 0.853471816   | -9.826351166  |
| C  | 2.708611012  | -8.889381409 | -5.535960674  | H | 2.283164024  | 1.601451159   | -7.243144989  |
| H  | 3.262113571  | -8.456606865 | -4.700263977  | H | 0.901305377  | 0.538139760   | -7.599336624  |
| H  | 2.471319437  | -9.931097984 | -5.289752007  | H | 2.550645351  | -0.026786478  | -7.883185387  |
| H  | 3.366018772  | -8.879826546 | -6.412165165  | H | -0.069785208 | 2.418172598   | -9.102957726  |



|    |              |              |               |    |              |              |               |
|----|--------------|--------------|---------------|----|--------------|--------------|---------------|
| H  | 1.334568381  | 3.436212063  | -8.719765663  | H  | -3.637844801 | 1.591316462  | -5.791276932  |
| H  | 0.928209484  | 3.100059748  | -10.408851624 | H  | -0.855267704 | 2.865806103  | -6.008273125  |
| H  | -3.469411373 | -1.408576846 | -13.366670609 | H  | -0.594918191 | 2.233990431  | -3.608427286  |
| H  | -4.603049755 | -0.048871711 | -13.436816216 | H  | -2.189129591 | 1.484226584  | -3.616618395  |
| H  | -2.985823154 | 0.124738403  | -14.143670082 | H  | -0.421841145 | -0.237684831 | -3.853912592  |
| H  | -3.392676115 | -0.100755170 | -9.841593742  | H  | 0.236960441  | 0.591508031  | -5.262652397  |
| H  | -4.839485645 | -0.210623384 | -10.858588219 | H  | -2.204922199 | 3.507927179  | -5.067556858  |
| H  | -3.669889212 | -1.546184659 | -10.835167885 | C  | -2.429420710 | -2.963458300 | -6.995737076  |
| H  | -2.683164835 | 2.078942776  | -10.942751884 | C  | -2.328915358 | -2.895875931 | -8.541126251  |
| H  | -2.545523167 | 2.180915356  | -12.716439247 | C  | -3.405141115 | -3.767946005 | -9.205552101  |
| H  | -4.142690659 | 2.054300308  | -11.953238487 | C  | -4.814804077 | -3.382726431 | -8.737376213  |
| H  | -1.302990794 | -5.849796772 | -10.099459648 | C  | -4.914676189 | -3.429683447 | -7.206678391  |
| H  | -0.311365724 | -4.694692135 | -9.181322098  | C  | -3.843496799 | -2.547385454 | -6.540738106  |
| H  | -1.857527375 | -4.173842907 | -9.845151901  | H  | -2.250247240 | -4.001989841 | -6.704179764  |
| H  | -0.711988688 | -4.209297657 | -13.454818726 | H  | -1.339834571 | -3.226839304 | -8.866721153  |
| H  | -1.597889900 | -5.487644672 | -12.631191254 | H  | -2.443901539 | -1.854878306 | -8.874613762  |
| H  | -2.092792749 | -3.810367107 | -12.372203827 | H  | -3.320601463 | -3.683822155 | -10.296142578 |
| H  | 1.512122989  | -4.841696262 | -12.464426041 | H  | -3.209098577 | -4.820757389 | -8.958605766  |
| H  | 1.677581549  | -5.120339394 | -10.717449188 | H  | -5.041956425 | -2.362714291 | -9.082378387  |
| H  | 0.746825933  | -6.257639408 | -11.707757950 | H  | -5.907760143 | -3.101107121 | -6.876488209  |
| Na | -0.614544272 | -1.735316038 | -13.083339691 | H  | -4.793241501 | -4.462661743 | -6.855649948  |
| Na | 2.224261045  | -1.211061358 | -11.449153900 | H  | -3.943523407 | -2.611071825 | -5.458496571  |
| Na | -0.655820787 | -0.801378846 | -9.876257896  | H  | -4.030928612 | -1.504385591 | -6.823791504  |
| Na | 0.260548234  | 0.983443260  | -12.170669556 | H  | -5.565298557 | -4.041912556 | -9.191501617  |
| H  | 3.137912035  | -3.184283972 | -4.871307373  | Pd | 0.801910460  | -2.309129238 | -7.736950397  |
| H  | 5.105194569  | -3.969184399 | -3.646537066  | Cl | 0.630169153  | -4.888762951 | -7.302541733  |
| H  | 5.002101421  | -6.156672001 | -2.422419548  | C  | 1.049079895  | -0.348415464 | -8.032328606  |
| H  | 2.914200544  | -7.479371071 | -2.501899958  | C  | 1.878748417  | 0.405979067  | -7.189771652  |
| H  | 2.808384418  | -2.951941967 | -9.436409950  | C  | 0.498762608  | 0.271492541  | -9.165057182  |

=====

1E'

=====

|   |              |              |              |   |              |              |               |
|---|--------------|--------------|--------------|---|--------------|--------------|---------------|
| C | -2.547958612 | -3.988392115 | -3.744698763 | H | 2.321010113  | -0.043888904 | -6.304177284  |
| C | -3.532558441 | -3.202867985 | -3.101648808 | H | -0.133687690 | -0.296923161 | -9.841276169  |
| C | -4.848682404 | -3.672245502 | -3.056579828 | H | 2.800572157  | 2.318732500  | -6.811264515  |
| C | -5.218734741 | -4.891190052 | -3.632543087 | H | 0.345562547  | 2.072224855  | -10.335545540 |
| C | -4.228820801 | -5.648160458 | -4.260401726 | H | 1.816020966  | 3.397835732  | -8.825698853  |
| C | -2.895391941 | -5.228069782 | -4.327827454 | N | 2.238943338  | -2.737277031 | -9.337439537  |
| C | -1.105941176 | -3.578338861 | -3.668133259 | H | 3.451999903  | -3.473311186 | -8.717445374  |
| C | -0.391557842 | -2.826531172 | -4.625885010 | C | -1.844615340 | -6.121861935 | -4.981904984  |
| C | 0.970548570  | -2.559854984 | -4.378032684 | H | -1.001208186 | -5.495348930 | -5.282143593  |
| C | 1.621878743  | -2.997478247 | -3.230679989 | C | -2.343289375 | -6.832889080 | -6.252110481  |
| C | 0.916125238  | -3.738101244 | -2.284182787 | C | -1.309287548 | -7.158660889 | -3.974540949  |
| C | -0.426737010 | -4.017665386 | -2.515095949 | H | -0.856325150 | -6.674265862 | -3.105133533  |
| H | -5.607635975 | -3.069687843 | -2.566080093 | H | -2.117626905 | -7.809404373 | -3.619807482  |
| H | -4.506820679 | -6.597103119 | -4.711363316 | H | -0.545989811 | -7.787408352 | -4.447165012  |
| P | -0.970853269 | -2.050608397 | -6.217021465 | H | -3.057730436 | -7.632926941 | -6.024622917  |
| C | -1.652254224 | -0.389648974 | -5.653285503 | H | -1.493010998 | -7.280495167 | -6.775924206  |
| C | -2.075260162 | 0.505558372  | -6.838472366 | H | -2.826349974 | -6.137416840 | -6.944767952  |
| C | -2.711885452 | 1.814619184  | -6.342254639 | C | -3.179021358 | -1.865630150 | -2.453161955  |
| C | -1.744063139 | 2.579610586  | -5.427514076 | H | -2.219927788 | -1.538654208 | -2.867575407  |
| C | -1.312566876 | 1.700516343  | -4.244235992 | C | -2.988982439 | -2.026070118 | -0.932558298  |
| C | -0.689585030 | 0.376034021  | -4.719694614 | C | -4.208133698 | -0.760999501 | -2.752257109  |
| H | -2.549620152 | -0.646241605 | -5.075936794 | H | -4.408642292 | -0.673452497 | -3.824826717  |
| H | -2.770567417 | -0.019839035 | -7.500420570 | H | -5.163607121 | -0.946309507 | -2.249822140  |
| H | -1.193977952 | 0.744630635  | -7.437552929 | H | -3.837513685 | 0.206072941  | -2.395676613  |
| H | -2.996937752 | 2.432285309  | -7.202884674 | H | -3.911860466 | -2.390192509 | -0.466568351  |
|   |              |              |              | H | -2.728165627 | -1.067077756 | -0.469713688  |

H -2.191495895 -2.739992619 -0.707562447  
C -6.661024094 -5.376150608 -3.592598677  
H -6.688879967 -6.358345032 -4.083216667  
C -7.592052460 -4.435594559 -4.380409718  
C -7.159975052 -5.561976910 -2.148321152  
H -6.511355400 -6.245814323 -1.591556191  
H -7.178542614 -4.607085228 -1.610813737  
H -8.177694321 -5.968464851 -2.138422251  
H -7.602626324 -3.432873249 -3.937924862  
H -8.621139526 -4.812964916 -4.378159523  
H -7.264402390 -4.338250160 -5.419670105  
H 1.668722391 -3.437963009 -9.816964149  
C 6.389412880 -5.006901264 -12.632096291  
O 5.345724583 -5.236575603 -11.724491119  
C 0.862898767 -5.601852417 -11.794077873  
O 2.090882540 -5.357697487 -11.154179573  
C 4.948233604 -3.683969021 -7.274444580  
O 4.238175392 -4.126436710 -8.452513695  
C 4.215477467 -8.667278290 -8.927909851  
O 4.089514256 -7.379455566 -9.462961197  
C 5.869340420 -4.200300217 -13.843440056  
C 6.956814289 -6.353399754 -13.130078316  
C 7.516619682 -4.204691887 -11.944087029  
C 0.923552513 -5.111827850 -13.258899689  
C -0.298062205 -4.885127544 -11.066290855  
C 0.557885110 -7.119745255 -11.795317650  
C 5.474048615 -4.938327312 -6.564716816  
C 6.112086296 -2.779800653 -7.711384296  
C 3.994956970 -2.934171200 -6.336925507  
C 4.450679779 -8.588179588 -7.403068542  
C 2.926569462 -9.477881432 -9.194343567  
C 5.412190914 -9.395721436 -9.580918312  
H 5.518832684 -3.209801435 -13.522371292  
H 6.638998032 -4.044460773 -14.608812332  
H 5.026538849 -4.728041172 -14.305978775  
H 7.812671185 -6.228830338 -13.804273605  
H 7.275744915 -6.961021423 -12.274695396  
H 6.181784153 -6.911821842 -13.671708107  
H 7.111177921 -3.271610498 -11.534684181  
H 7.942188740 -4.784924984 -11.113466263  
H 8.337140083 -3.953107595 -12.626684189  
H 1.734741092 -5.621415615 -13.795956612  
H -0.011203758 -5.293611526 -13.802932739  
H 1.130735755 -4.036351204 -13.291720390  
H -1.268825412 -5.095863342 -11.531317711  
H -0.342760026 -5.196146965 -10.017515182  
H -0.156498402 -3.799004555 -11.079883575  
H 0.540914953 -7.507035732 -10.770413399  
H -0.404619753 -7.354264259 -12.265178680  
H 1.330317974 -7.672324181 -12.351922989  
H 3.619177818 -8.060257912 -6.920301914  
H 4.541271210 -9.577810287 -6.938766479  
H 5.369696617 -8.027837753 -7.192461491  
H 2.734855890 -9.542743683 -10.273098946  
H 2.980096340 -10.498702049 -8.796880722  
H 2.064669609 -8.979070663 -8.734290123  
H 5.266740322 -9.466673851 -10.666822433  
H 6.337371826 -8.831524849 -9.405309677

H 5.554924965 -10.411027908 -9.191602707  
H 5.999543667 -4.670920849 -5.642228127  
H 4.649030209 -5.611098289 -6.316480637  
H 6.191376686 -5.493424892 -7.185427189  
H 5.736968994 -1.915593982 -8.265430450  
H 6.682031155 -2.418646574 -6.848126411  
H 6.804332733 -3.319448471 -8.370995522  
H 3.620747566 -2.022042990 -6.809327602  
H 3.135597944 -3.564239264 -6.091934681  
H 4.509176731 -2.654787540 -5.410390377  
Na 5.500715733 -5.691864014 -9.565463066  
Na 3.692852736 -3.805828571 -11.385900497  
Na 2.444085360 -5.878804207 -8.911037445  
Na 3.740280867 -6.845746040 -11.613329887  
C 2.592223883 -1.746542811 -10.258147240  
C 3.593586683 -0.803591073 -9.934676170  
C 2.015924931 -1.668544173 -11.549212456  
C 3.997788906 0.157812029 -10.853919029  
C 2.440738201 -0.708248138 -12.472116470  
C 3.435098410 0.210311860 -12.135322571  
H 4.000738144 -0.808872759 -8.930338860  
H 1.209176898 -2.347973108 -11.805660248  
H 4.751661301 0.885333002 -10.563635826  
H 1.973362803 -0.670981586 -13.453514099  
H 3.753792524 0.965952754 -12.847145081  
H 1.534497738 -2.004308462 -5.119807720  
H 2.675182581 -2.771257162 -3.089865208  
H 1.402629137 -4.100396633 -1.382935405  
H -0.985724509 -4.601388454 -1.790206194

=====  
1F  
=====

C -2.500727654 -4.549336433 -4.479115009  
C -3.180128813 -3.808325291 -3.479363441  
C -4.536775589 -4.056071281 -3.259627342  
C -5.246944427 -5.005458355 -4.001498699  
C -4.555648327 -5.722790718 -4.975635052  
C -3.191003323 -5.526776314 -5.224968433  
C -1.010620713 -4.400938988 -4.596539497  
C -0.316438675 -3.397704840 -5.313146591  
C 1.088870883 -3.347443581 -5.175098419  
C 1.803020477 -4.250833988 -4.387980938  
C 1.118751645 -5.282883167 -3.737787008  
C -0.268514961 -5.337716103 -3.847024441  
H -5.056914806 -3.495049715 -2.489300251  
H -5.093355656 -6.474658489 -5.548026562  
P -0.931309819 -2.098487377 -6.511393070  
C -1.155264735 -0.576037288 -5.425740242  
C -1.528589249 0.654258788 -6.281801701  
C -1.768716693 1.891943336 -5.401922226  
C -0.532396376 2.201021910 -4.545384884  
C -0.157789424 0.985870898 -3.684506178  
C 0.075873621 -0.266665876 -4.547348022  
H -1.997014284 -0.802284002 -4.760102272  
H -2.415476799 0.452551365 -6.891220093  
H -0.712883115 0.865347445 -6.976289272  
H -2.019960165 2.749504089 -6.037963867

|    |              |              |               |    |              |               |               |
|----|--------------|--------------|---------------|----|--------------|---------------|---------------|
| H  | -2.635165215 | 1.718130112  | -4.746118546  | H  | -1.310513735 | -4.298497200  | -1.494167447  |
| H  | 0.309225738  | 2.446583033  | -5.208633423  | C  | -6.725679874 | -5.258569241  | -3.745628595  |
| H  | 0.741964757  | 1.194468856  | -3.092447281  | H  | -7.047081470 | -6.047025681  | -4.439270973  |
| H  | -0.967884600 | 0.785663486  | -2.967227697  | C  | -7.573598862 | -4.006671429  | -4.037289619  |
| H  | 0.310239971  | -1.117347479 | -3.898995876  | C  | -6.970535278 | -5.769246578  | -2.313586712  |
| H  | 0.945784986  | -0.099947035 | -5.192843437  | H  | -6.385916710 | -6.672245502  | -2.110429049  |
| H  | -0.711100638 | 3.078844786  | -3.912161112  | H  | -6.687198639 | -5.014073372  | -1.571644902  |
| C  | -2.663133144 | -2.526279449 | -7.130504131  | H  | -8.029977798 | -6.003979683  | -2.160942554  |
| C  | -2.819883823 | -2.099659204 | -8.611626625  | H  | -7.299941063 | -3.181839466  | -3.369367123  |
| C  | -4.162625790 | -2.581256628 | -9.187503815  | H  | -8.639185905 | -4.215795517  | -3.889564276  |
| C  | -5.354811192 | -2.094944715 | -8.350895882  | H  | -7.429278851 | -3.664376736  | -5.066304684  |
| C  | -5.188243866 | -2.503097773 | -6.880910873  | C  | 2.404547453  | -6.969017506  | -12.093203545 |
| C  | -3.853708029 | -1.995977402 | -6.306182384  | O  | 2.204793453  | -6.679904461  | -10.738678932 |
| H  | -2.675673485 | -3.619371176 | -7.097906113  | C  | 4.752394676  | -4.644932270  | -7.604504108  |
| H  | -1.996959686 | -2.501232147 | -9.208343506  | O  | 3.574202776  | -5.290559292  | -7.995363235  |
| H  | -2.763195992 | -1.004477382 | -8.685450554  | C  | 1.590142012  | -9.033063889  | -7.018370628  |
| H  | -4.257562160 | -2.243762970 | -10.227004051 | O  | 1.481333137  | -7.827138901  | -7.716187954  |
| H  | -4.163689613 | -3.680138588 | -9.214439392  | C  | 1.112791896  | -6.685825825  | -12.892169952 |
| H  | -5.418269634 | -0.998576701 | -8.416111946  | C  | 2.785670519  | -8.457479477  | -12.262920380 |
| H  | -6.015650272 | -2.112702847 | -6.275431156  | C  | 3.545287609  | -6.094025612  | -12.660562515 |
| H  | -5.221096992 | -3.596615076 | -6.790573597  | C  | 5.366706371  | -5.368818760  | -6.384665966  |
| H  | -3.772337198 | -2.296521902 | -5.263261318  | C  | 5.781645298  | -4.659271717  | -8.760084152  |
| H  | -3.860331297 | -0.899533033 | -6.329021454  | C  | 4.457125664  | -3.176045895  | -7.225337029  |
| H  | -6.295105934 | -2.489264488 | -8.756012917  | C  | 3.001610518  | -9.643126488  | -7.219805241  |
| Pd | 0.588126123  | -2.170735121 | -8.380138397  | C  | 1.374024272  | -8.796444893  | -5.506005764  |
| Cl | -0.232417509 | -4.701332092 | -8.596633911  | C  | 0.546239138  | -10.046231270 | -7.536489487  |
| C  | 1.282535911  | -0.309154838 | -8.207958221  | H  | 0.798151791  | -5.648919582  | -12.728981972 |
| C  | 2.339957237  | -0.015807625 | -7.332253456  | H  | 1.236189246  | -6.846973419  | -13.969927788 |
| C  | 0.728185773  | 0.740777612  | -8.958709717  | H  | 0.302275509  | -7.344532967  | -12.549199104 |
| C  | 2.787513256  | 1.300292253  | -7.165275097  | H  | 2.910233021  | -8.748060226  | -13.313168526 |
| C  | 1.179542661  | 2.054809332  | -8.793344498  | H  | 3.729615211  | -8.667189598  | -11.741967201 |
| C  | 2.200339079  | 2.344147444  | -7.883563519  | H  | 2.008786917  | -9.093084335  | -11.819651604 |
| H  | 2.818835258  | -0.809717596 | -6.766153336  | H  | 3.271229506  | -5.032339573  | -12.608873367 |
| H  | -0.079140894 | 0.539128661  | -9.657790184  | H  | 4.454914093  | -6.240324974  | -12.065412521 |
| H  | 3.597068548  | 1.507284045  | -6.468405724  | H  | 3.777218342  | -6.327562809  | -13.706640244 |
| H  | 0.725349069  | 2.855331182  | -9.373338699  | H  | 3.768296242  | -8.943355560  | -6.858885765  |
| H  | 2.546821594  | 3.365684509  | -7.751978874  | H  | 3.139204025  | -10.587716103 | -6.680145264  |
| N  | 1.813147783  | -2.339821815 | -10.065850258 | H  | 3.174177408  | -9.850290298  | -8.285992622  |
| H  | 2.480581045  | -1.567329526 | -10.054052353 | H  | 0.403172106  | -8.320014954  | -5.341150284  |
| C  | -2.486891031 | -6.444842815 | -6.221570969  | H  | 1.407850862  | -9.723735809  | -4.920756340  |
| H  | -1.471868753 | -6.072381973 | -6.379680634  | H  | 2.153768301  | -8.126874924  | -5.119284153  |
| C  | -3.161736250 | -6.478680611 | -7.603430748  | H  | -0.460974842 | -9.630880356  | -7.424066067  |
| C  | -2.392588854 | -7.866608620 | -5.634360790  | H  | 0.718998432  | -10.239524841 | -8.603150368  |
| H  | -1.878677964 | -7.868043423 | -4.667605877  | H  | 0.581582487  | -11.006147385 | -7.007363796  |
| H  | -3.389758587 | -8.294377327 | -5.480029106  | H  | 6.290816784  | -4.895641327  | -6.029940128  |
| H  | -1.841487288 | -8.527582169 | -6.309783936  | H  | 4.647604465  | -5.379114628  | -5.556035995  |
| H  | -4.197050095 | -6.832546234 | -7.548246861  | H  | 5.592680931  | -6.411979675  | -6.640544891  |
| H  | -2.617318392 | -7.164052963 | -8.264303207  | H  | 5.377331257  | -4.140087128  | -9.638124466  |
| H  | -3.153003931 | -5.494965076 | -8.076624870  | H  | 6.726915359  | -4.173378468  | -8.489295959  |
| C  | -2.445219994 | -2.791790724 | -2.605257988  | H  | 6.006490707  | -5.692847729  | -9.055541039  |
| H  | -1.549722910 | -2.470097542 | -3.143365860  | H  | 3.971958637  | -2.658853054  | -8.059611320  |
| C  | -1.973315477 | -3.451400280 | -1.294331551  | H  | 3.766818285  | -3.144176960  | -6.375327110  |
| C  | -3.270013332 | -1.528604150 | -2.303599596  | H  | 5.362721920  | -2.621565580  | -6.949676991  |
| H  | -3.682165861 | -1.084124207 | -3.214817762  | Na | 3.329504490  | -7.281047344  | -8.927438736  |
| H  | -4.105504036 | -1.736834526 | -1.626564741  | Na | 2.476931334  | -4.539937496  | -9.880023003  |
| H  | -2.638231277 | -0.778058290 | -1.816462278  | Na | 1.689387202  | -5.744628429  | -6.882240295  |
| H  | -2.830765486 | -3.819812536 | -0.719641626  | Na | 0.390925556  | -7.140985966  | -9.528817177  |
| H  | -1.428586841 | -2.731627226 | -0.672542334  | H  | 1.637348413  | -2.587883472  | -5.723253727  |

H 2.883301258 -4.161113262 -4.309497356  
H 1.653070927 -6.019940853 -3.145312786  
H -0.817355752 -6.115255833 -3.323947668  
H 1.182128668 -2.098670959 -10.835304260

=====  
1F'  
=====

C -2.527150393 -4.489874363 -4.411651611  
C -3.234802485 -3.733662367 -3.444737673  
C -4.598790646 -3.976504564 -3.261197805  
C -5.284262180 -4.942914486 -4.004816532  
C -4.564923286 -5.676106453 -4.947389126  
C -3.196261644 -5.477316380 -5.165548801  
C -1.032750130 -4.353725910 -4.494723797  
C -0.312500805 -3.393173218 -5.241307259  
C 1.093332648 -3.371254444 -5.104031086  
C 1.784939170 -4.262539864 -4.285055637  
C 1.073569059 -5.245396614 -3.589084148  
C -0.314416915 -5.271343231 -3.699400187  
H -5.141921043 -3.400187016 -2.518383265  
H -5.085655212 -6.436825752 -5.523414612  
P -0.899121463 -2.115310431 -6.473237038  
C -1.141917109 -0.573369563 -5.424164772  
C -1.476149321 0.650824547 -6.305263042  
C -1.734759927 1.898027897 -5.444071770  
C -0.524574816 2.205481052 -4.550364494  
C -0.188088581 0.996411800 -3.665174007  
C 0.061715160 -0.267217278 -4.506917477  
H -2.008393764 -0.786075652 -4.785793781  
H -2.344949961 0.449410886 -6.940210819  
H -0.637883663 0.848623455 -6.976655960  
H -1.958503485 2.751480579 -6.095451832  
H -2.623209953 1.736305118 -4.815220833  
H 0.339794427 2.437732458 -5.188664913  
H 0.694175899 1.203445792 -3.046786308  
H -1.022184968 0.810823739 -2.972197294  
H 0.267626792 -1.114084840 -3.844125748  
H 0.953086376 -0.114522837 -5.125009537  
H -0.716032267 3.091184616 -3.932126522  
C -2.604530811 -2.546609879 -7.153211117  
C -2.701230526 -2.134790421 -8.644493103  
C -4.016571045 -2.628270626 -9.269115448  
C -5.243178844 -2.136797667 -8.486431122  
C -5.135485172 -2.523012161 -7.004397392  
C -3.825750351 -2.006201506 -6.382173061  
H -2.615198851 -3.639851570 -7.111714840  
H -1.854677439 -2.535032749 -9.208350182  
H -2.645439863 -1.040768981 -8.728913307  
H -4.067326546 -2.301726580 -10.314954758  
H -4.011428356 -3.727685690 -9.284760475  
H -5.307826996 -1.041750193 -8.569336891  
H -5.987721443 -2.126027822 -6.438780308  
H -5.170457363 -3.615393639 -6.898475647  
H -3.786146879 -2.292921066 -5.332715988  
H -3.830114603 -0.909699321 -6.420140266  
H -6.165202141 -2.540374517 -8.923175812  
Pd 0.614311695 -2.247136831 -8.302809715

Cl -0.160917804 -4.795710087 -8.429011345  
C 1.259020448 -0.360241115 -8.221797943  
C 2.260720968 0.032499295 -7.322116375  
C 0.723882496 0.595939338 -9.098528862  
C 2.673266649 1.369395137 -7.256046295  
C 1.137868881 1.930380702 -9.028991699  
C 2.101671457 2.326884985 -8.096733093  
H 2.724833727 -0.696757853 -6.663268089  
H -0.018182585 0.302200317 -9.836339951  
H 3.442647457 1.659355998 -6.543531895  
H 0.703688264 2.662069082 -9.706917763  
H 2.417237997 3.365232944 -8.040731430  
N 1.809176922 -2.394703150 -10.035159111  
H 2.547976255 -1.697473526 -9.959893227  
C -2.458263159 -6.377460003 -6.151772976  
H -1.475711942 -5.941187382 -6.344592571  
C -3.160987139 -6.495985985 -7.514620304  
C -2.250526667 -7.775024891 -5.538899422  
H -1.689879179 -7.722739697 -4.600488663  
H -3.212578535 -8.255952835 -5.326832294  
H -1.693385363 -8.416577339 -6.228378773  
H -4.139209270 -6.982625008 -7.434061527  
H -2.549792767 -7.101789474 -8.193298340  
H -3.299720764 -5.519342422 -7.983594418  
C -2.524848938 -2.696889400 -2.575729132  
H -1.613425851 -2.390630960 -3.096615314  
C -2.092212439 -3.322140932 -1.235216141  
C -3.358901262 -1.426901102 -2.334500074  
H -3.736532211 -1.005164146 -3.271300077  
H -4.219470024 -1.619350553 -1.684648752  
H -2.745506763 -0.664566576 -1.842133760  
H -2.966011524 -3.676711798 -0.676765263  
H -1.565883160 -2.586767435 -0.615900278  
H -1.423770070 -4.173532963 -1.394282222  
C -6.769607544 -5.194649220 -3.791209936  
H -7.067210674 -5.996132374 -4.480505466  
C -7.607912540 -3.949486494 -4.135089874  
C -7.058920860 -5.680562019 -2.358672380  
H -6.481219769 -6.579964638 -2.122307539  
H -6.798151016 -4.912886620 -1.621229053  
H -8.122499466 -5.913057804 -2.234571457  
H -7.358765125 -3.112110853 -3.473217726  
H -8.677868843 -4.157103539 -4.021548271  
H -7.427436352 -3.625846624 -5.164679050  
C 2.271055937 -6.801948071 -12.098690987  
O 2.189701319 -6.669869423 -10.705231667  
C 4.757969856 -4.658137321 -7.566556931  
O 3.590972900 -5.335691929 -7.938621044  
C 1.635147333 -9.179536819 -7.100975990  
O 1.549834728 -7.921319485 -7.703967094  
C 0.865849018 -6.663797379 -12.728557587  
C 2.857688427 -8.184348106 -12.454477310  
C 3.181563139 -5.697840214 -12.685337067  
C 5.426580429 -5.383664608 -6.377058983  
C 5.756070614 -4.617859364 -8.748047829  
C 4.427908897 -3.205666780 -7.151066780  
C 3.004690170 -9.831971169 -7.420696259  
C 1.502715468 -9.046895981 -5.566383362

C 0.520665288 -10.108158112 -7.634067059  
H 0.430006057 -5.695259094 -12.458988190  
H 0.885095179 -6.735997677 -13.822691917  
H 0.205050051 -7.462745667 -12.359493256  
H 2.909091949 -8.359925270 -13.535844803  
H 3.873403549 -8.275415421 -12.047488213  
H 2.241282225 -8.972867966 -12.004900932  
H 2.743926287 -4.705777645 -12.511952400  
H 4.166874886 -5.736720085 -12.203423500  
H 3.326618195 -5.804502487 -13.766867638  
H 3.819467545 -9.196627617 -7.045792103  
H 3.124129534 -10.821828842 -6.964194298  
H 3.116351366 -9.957570076 -8.507256508  
H 0.554907739 -8.558844566 -5.316953659  
H 1.537877798 -10.014392853 -5.050511360  
H 2.322041988 -8.427951813 -5.176876545  
H -0.461257100 -9.663459778 -7.437891483  
H 0.630673587 -10.232892990 -8.719663620  
H 0.540074587 -11.105035782 -7.177382946  
H 6.347877979 -4.891624451 -6.041320801  
H 4.732155800 -5.424907207 -5.528095245  
H 5.671660423 -6.416166306 -6.656892776  
H 5.315876961 -4.089420319 -9.603382111  
H 6.694223881 -4.112129688 -8.490128517  
H 6.000764370 -5.637525558 -9.073768616  
H 3.902839422 -2.685812473 -7.959387779  
H 3.763233185 -3.210308790 -6.280780315  
H 5.324186325 -2.628420830 -6.892076969  
Na 3.360844612 -7.313356876 -8.935798645  
Na 2.481408119 -4.605966568 -9.819102287  
Na 1.757007718 -5.875783920 -6.779788017  
Na 0.415932834 -7.197374344 -9.481081963  
C 1.094481349 -2.148964882 -11.213411331  
C 1.477165222 -1.135771275 -12.120223045  
C -0.023447808 -2.945762873 -11.560911179  
C 0.789692700 -0.940492511 -13.317164421  
C -0.708779991 -2.735599518 -12.754031181  
C -0.310621560 -1.735456347 -13.647300720  
H 2.322262049 -0.498833805 -11.867386818  
H -0.342878520 -3.726459742 -10.878324509  
H 1.113588214 -0.152494997 -13.993322372  
H -1.563552618 -3.365623474 -12.990706444  
H -0.847579539 -1.577959418 -14.578192711  
H 1.659483194 -2.647219181 -5.681405544  
H 2.867631674 -4.198177338 -4.210402489  
H 1.588231206 -5.967588425 -2.961595774  
H -0.882356167 -6.012175560 -3.144593477

IG

C 1.462517500 -0.200765237 3.290511370  
C 0.103517652 -0.472538769 3.029052973  
C -0.226703078 -1.679102421 2.400947809  
C 0.741186857 -2.615365505 2.031392574  
C 2.081663132 -2.317879915 2.295632839  
C 2.463600874 -1.125513434 2.916377306  
C 1.849550843 0.979891121 4.128629684

C 2.186425686 2.271758556 3.673741341  
C 2.584144115 3.226315975 4.635411263  
C 2.657705784 2.937168121 5.992756844  
C 2.302202940 1.665811419 6.439466476  
C 1.902895093 0.712719381 5.510578156  
H -1.269985437 -1.900052786 2.192261696  
H 2.848064423 -3.032596588 2.008934498  
P 2.215545416 2.981451511 1.954858780  
C 1.213746428 1.947207093 0.737701297  
C 1.940094113 0.762622893 0.069665015  
C 0.974555612 -0.043196142 -0.817002535  
C 0.330635190 0.842762411 -1.892025352  
C -0.364710063 2.055155993 -1.255680084  
C 0.587556124 2.853735924 -0.349472672  
H 0.395917147 1.552550435 1.347421288  
H 2.379127741 0.103386052 0.816353202  
H 2.758449316 1.141275764 -0.557092845  
H 1.514672756 -0.880109429 -1.276913047  
H 0.197247654 -0.485060781 -0.180215642  
H 1.110766649 1.196588635 -2.582247734  
H -0.772897720 2.715684891 -2.030620575  
H -1.220256567 1.712216854 -0.656889796  
H 0.049670659 3.680282831 0.116066478  
H 1.382203698 3.299469709 -0.962786674  
H -0.381632119 0.263743669 -2.492729664  
C 4.009958744 2.758643866 1.428641438  
C 5.018725395 3.208012342 2.504482031  
C 6.464512348 3.016470671 2.017887592  
C 6.719244480 3.759623051 0.699207962  
C 5.709608078 3.332614899 -0.375560045  
C 4.263270378 3.522099733 0.110409588  
H 4.161669254 1.686416745 1.252578497  
H 4.865911961 2.650478125 3.433144808  
H 4.849790573 4.268769264 2.740707636  
H 7.162693977 3.356071711 2.792669058  
H 6.652897358 1.942284107 1.873423696  
H 6.624028683 4.841317177 0.872251987  
H 5.867721081 3.901128531 -1.299892664  
H 5.868849754 2.273301840 -0.624955475  
H 3.565252542 3.200425863 -0.668989360  
H 4.069772243 4.591719627 0.278037667  
H 7.745051861 3.585199118 0.352771252  
Pd 1.506668091 5.256878376 2.085635900  
C 3.939798594 -0.846237540 3.195989132  
H 4.040410995 0.221635848 3.415592432  
C 4.852391243 -1.147648573 1.993852258  
C 4.413532257 -1.618030190 4.442136288  
H 3.828307629 -1.340074062 5.323459625  
H 4.305303574 -2.698018312 4.290413380  
H 5.468265057 -1.407447934 4.653234959  
H 4.901359081 -2.219744444 1.775110960  
H 5.873783112 -0.811883032 2.205748796  
H 4.510226727 -0.639161706 1.087346673  
C -0.991127729 0.507093906 3.448477268  
H -0.542065263 1.501926541 3.536184072  
C -1.555390835 0.145676434 4.836717606  
C -2.135497570 0.618457377 2.427819252  
H -1.756704569 0.775767863 1.413882256

H -2.761851072 -0.280625612 2.415858984  
H -2.772815466 1.469475031 2.683148861  
H -2.008933783 -0.852222621 4.821332455  
H -2.324031115 0.868794322 5.130980492  
H -0.773459792 0.152592570 5.600878239  
C 0.345194638 -3.915893078 1.346815586  
H -0.749888897 -3.921671867 1.264747143  
C 0.756913900 -5.144057274 2.179254532  
C 0.919546187 -3.998548508 -0.079947472  
H 0.601918578 -3.142330885 -0.683031499  
H 2.015439034 -4.005667210 -0.062206998  
H 0.588096321 -4.915311337 -0.580694854  
H 1.846500397 -5.205562592 2.279712915  
H 0.414497614 -6.069251537 1.702154398  
H 0.331078529 -5.099253654 3.186722517  
H 1.627195597 -0.283884555 5.843417645  
H 2.332731485 1.418443561 7.496983051  
H 2.971954346 3.705784082 6.692992687  
H 2.819364786 4.233876228 4.302176952  
C -0.331354797 4.780509472 2.741349459  
C -0.549761176 4.313673973 4.045109272  
C -1.432666063 4.932336330 1.884007573  
C -1.839526772 3.976299286 4.470312595  
C -2.718546391 4.588146687 2.312608719  
C -2.927765608 4.106946468 3.606332064  
H 0.276202410 4.197595119 4.736299038  
H -1.298759580 5.322082520 0.879224718  
H -1.987231493 3.608594179 5.483336926  
H -3.558681250 4.705201149 1.631789446  
H -3.928275347 3.843479633 3.939443588  
N 1.176201224 7.211997509 2.142581463  
H 0.965309203 7.554146290 3.082191467  
H 0.381184578 7.510134220 1.573864698

=====  
1G'  
=====

C 1.538603425 -0.136651441 3.256891489  
C 0.183929890 -0.444180816 3.009638548  
C -0.117832266 -1.628960609 2.328151941  
C 0.873565376 -2.508593798 1.889766216  
C 2.208829641 -2.175041914 2.138525486  
C 2.562788725 -1.003459692 2.812617064  
C 1.898206353 1.007198334 4.156824112  
C 2.178854465 2.337653399 3.779240370  
C 2.537293673 3.249634027 4.796200752  
C 2.624023914 2.885383368 6.134210587  
C 2.330331326 1.574635386 6.504069805  
C 1.972580194 0.661148548 5.520121574  
H -1.157666683 -1.877083898 2.132396221  
H 2.992974043 -2.844968319 1.797204852  
P 2.172747612 3.147651434 2.104260445  
C 1.157412171 2.177981853 0.847342134  
C 1.889064789 1.042489529 0.102288365  
C 0.913858354 0.262731969 -0.796650290  
C 0.227338701 1.187494516 -1.811122775  
C -0.465269268 2.360044479 -1.101118922  
C 0.498932570 3.129004478 -0.181427807

H 0.356702268 1.739004970 1.450233221  
H 2.362811565 0.356163681 0.800800204  
H 2.681230307 1.469401479 -0.526494741  
H 1.455846190 -0.541401863 -1.309646010  
H 0.161593735 -0.223390803 -0.161848351  
H 0.982863545 1.583199501 -2.505925894  
H -0.900550902 3.050761700 -1.833827615  
H -1.301777363 1.979658961 -0.497861356  
H -0.039002229 3.925260782 0.332244337  
H 1.276282310 3.610364676 -0.789763570  
H -0.493994474 0.625891209 -2.417562246  
C 3.954840899 2.996268034 1.530081391  
C 4.970434189 3.417494297 2.609515667  
C 6.409984589 3.274683475 2.088580608  
C 6.630900860 4.069995880 0.794121921  
C 5.607445717 3.671665192 -0.277819008  
C 4.170101166 3.825609446 0.244810373  
H 4.121133804 1.935473323 1.303315401  
H 4.844334126 2.815828800 3.515012741  
H 4.781601906 4.462288857 2.890606403  
H 7.116106510 3.597928524 2.863524914  
H 6.616915226 2.210511684 1.900769472  
H 6.521938324 5.142452240 1.004905581  
H 5.739554405 4.281239510 -1.179750323  
H 5.775677204 2.625749588 -0.574522555  
H 3.461237192 3.529824972 -0.534676075  
H 3.972546577 4.882909298 0.466256112  
H 7.652934074 3.921076536 0.424934417  
Pd 1.481767535 5.367485046 2.427612305  
C 4.033528805 -0.682389557 3.075801611  
H 4.098559856 0.378581643 3.339332104  
C 4.932055950 -0.898247719 1.844920516  
C 4.561264992 -1.486286640 4.279772282  
H 3.984327555 -1.267890930 5.183105469  
H 4.490807533 -2.562471628 4.084699631  
H 5.611366272 -1.243845940 4.479680538  
H 5.023519516 -1.958439469 1.585530043  
H 5.942090988 -0.525022507 2.048309565  
H 4.547972202 -0.373006642 0.965048552  
C -0.938078284 0.468334794 3.500443459  
H -0.519488037 1.468589067 3.648265600  
C -1.477134109 -0.004137923 4.864861488  
C -2.093731880 0.611241996 2.495319605  
H -1.727081776 0.842309117 1.491068244  
H -2.695439816 -0.302320302 2.429547071  
H -2.753082275 1.427213669 2.805166483  
H -1.892622709 -1.015663147 4.786769867  
H -2.272138596 0.665829659 5.211385727  
H -0.690013707 -0.017633352 5.623983383  
C 0.507033527 -3.783802032 1.144019961  
H -0.589201033 -3.835071802 1.104120493  
C 1.004938364 -5.039881706 1.881950498  
C 1.024954200 -3.752793312 -0.306356341  
H 0.639385402 -2.881191015 -0.844152987  
H 2.119659424 -3.702534437 -0.330417871  
H 0.720007002 -4.655181408 -0.848291099  
H 2.099329710 -5.059826851 1.935788512  
H 0.681630969 -5.948816299 1.362283349

H 0.619983315 -5.074917316 2.906138659  
H 1.742897749 -0.364679158 5.793444157  
H 2.374148846 1.266715407 7.545022011  
H 2.900449038 3.626345396 6.878719807  
H 2.724176884 4.285111904 4.524126530  
C -0.427865326 4.844716549 2.851433754  
C -0.743817329 4.164492130 4.036516190  
C -1.473853350 5.239707470 2.002750397  
C -2.075471878 3.878567696 4.358404160  
C -2.802686930 4.944447041 2.323561430  
C -3.108853817 4.262485504 3.502340555  
H 0.038506899 3.856397152 4.721575260  
H -1.261452436 5.783994198 1.085704803  
H -2.300401449 3.352237940 5.283770084  
H -3.599334002 5.255099773 1.651091099  
H -4.142277241 4.038498402 3.754001141  
N 1.081670642 7.416296005 2.705386162  
H 0.265270084 7.733194351 2.182069778  
C 2.242695808 7.682796478 2.025263071  
C 2.339886904 8.337921143 0.760309458  
C 3.451601982 7.171631813 2.594189405  
C 3.559938431 8.465357780 0.123772100  
C 4.675387383 7.304128647 1.921537399  
C 4.740014076 7.940259933 0.689223945  
H 1.433686733 8.734452248 0.308566809  
H 3.422950506 6.803346634 3.616835117  
H 3.608276367 8.973917007 -0.836325228  
H 5.580667496 6.927261829 2.390636206  
H 5.688868523 8.049852371 0.172800809

=====  
1H  
=====

H -2.840871572 -2.509807587 -2.599490166  
C -3.521009684 -1.727173090 -0.721721470  
C -2.569753408 -2.301146984 -1.569262028  
H -3.889560699 -1.041320920 1.271620870  
C -3.154963493 -1.476467967 0.599182963  
C -1.276084304 -2.592989445 -1.143690348  
C -1.871981502 -1.748731375 1.081375360  
C -0.905750751 -2.303975105 0.198410526  
P 1.781156301 -0.479818672 0.421057552  
C 0.357556522 -2.904845238 0.766869128  
C 1.596163154 -2.242857218 0.941769063  
H -0.710092902 -4.743682384 1.056782007  
C 0.245476305 -4.243368149 1.183644891  
C 2.661363602 -2.941020966 1.539565086  
H 3.608824253 -2.439409733 1.703195572  
C 1.314893484 -4.923707962 1.758451462  
C 2.531479359 -4.266994476 1.941868186  
H 1.195182562 -5.957500935 2.070783138  
H 3.372740746 -4.780726910 2.398822546  
C 3.115319729 -0.413173020 -0.898689568  
C 4.486015797 -1.023051262 -0.549840271  
C 2.616836071 -0.961882889 -2.247609615  
H 3.239225626 0.672302544 -1.019905806  
C 5.510059834 -0.731015325 -1.662051678  
H 4.377611160 -2.109920025 -0.444036692

H 4.858999252 -0.642991722 0.408153117  
C 3.633942842 -0.682377100 -3.366291285  
H 2.462971210 -2.045341015 -2.163092136  
H 1.646481752 -0.520482361 -2.495077848  
C 5.019265175 -1.251245022 -3.022049189  
H 6.477314949 -1.180931926 -1.406186581  
H 5.674210548 0.354540437 -1.723540545  
H 3.270918369 -1.101419210 -4.312640667  
H 3.713746786 0.404626757 -3.513380289  
H 5.742263794 -1.003922105 -3.808754444  
H 4.957725525 -2.348721504 -2.984145641  
C 2.611042261 0.324963540 1.906893969  
C 3.314769268 1.656119823 1.558190584  
C 1.568821788 0.523457468 3.025868654  
H 3.373606920 -0.376000494 2.273509264  
C 3.911645412 2.315903187 2.813294172  
H 2.600152731 2.344630003 1.099796414  
H 4.111242771 1.491147280 0.825314760  
C 2.173568487 1.203602195 4.263808250  
H 0.751791418 1.140495777 2.635503292  
H 1.134873986 -0.442185730 3.306712627  
C 2.842653036 2.534665346 3.892983437  
H 4.377469540 3.268671513 2.534098864  
H 4.712025166 1.678902030 3.219115496  
H 1.390355229 1.359100819 5.016121864  
H 2.919960737 0.536581397 4.720140457  
H 3.282913685 3.004479885 4.780986786  
H 2.081940174 3.227240086 3.505929232  
Pd -0.277760834 0.391491562 -0.330655158  
N -2.034734964 1.083198190 -1.076136112  
H -1.850170851 1.792709231 -1.789985299  
C 0.418735892 2.267369032 -0.353806078  
C 0.103964798 3.155536413 0.687897444  
C 1.295345902 2.700705767 -1.361033082  
C 0.688450575 4.425552368 0.743885934  
H -0.582520306 2.854164362 1.474397182  
C 1.877054691 3.972459078 -1.302719593  
H 1.542711854 2.041348696 -2.189125299  
C 1.585849881 4.836625099 -0.245169416  
H 0.442862749 5.093156338 1.567054987  
H 2.565166712 4.284276485 -2.085603237  
H 2.043942928 5.820772171 -0.196968347  
C -0.294062674 -3.242006779 -2.111589193  
C -0.266400158 -2.532528162 -3.476850748  
C -0.591594040 -4.743577957 -2.286275864  
H 0.703530014 -3.155539513 -1.672932029  
H -0.196804002 -1.448668242 -3.353900909  
H 0.590607524 -2.874892235 -4.067793846  
H -1.169948220 -2.743592739 -4.058999538  
H -0.512797773 -5.279387474 -1.335724235  
H -1.605054975 -4.892344952 -2.675722599  
H 0.113451771 -5.198719025 -2.991761446  
C -1.555376291 -1.510998249 2.553033829  
C -2.191754818 -2.606512308 3.428399086  
C -1.967450619 -0.108591259 3.030967951  
H -0.472832769 -1.589696765 2.673849344  
H -1.829115629 -3.598596811 3.140763760  
H -1.949795604 -2.448542356 4.485745907

H -3.282498360 -2.601669788 3.324394226  
H -1.558200121 0.660499454 2.369573355  
H -3.055920839 0.010299755 3.054255962  
H -1.594870090 0.071345426 4.045610905  
C -4.918470860 -1.405521870 -1.223040342  
C -5.707765102 -2.693394661 -1.526858091  
C -4.878976345 -0.471618921 -2.446663141  
H -5.439788818 -0.874627411 -0.415166438  
H -5.774302483 -3.338992119 -0.644550860  
H -6.725530624 -2.457421541 -1.858043194  
H -5.221863270 -3.267446518 -2.324561834  
H -4.242328644 0.392434388 -2.237814426  
H -4.462403774 -0.986539304 -3.320589542  
H -5.889839172 -0.139165252 -2.710141420  
H -2.500201225 1.614187002 -0.333874792

=====  
1H'  
=====

H -2.998185158 -2.108752489 -2.496991634  
C -3.580648661 -1.537400007 -0.514013171  
C -2.674028635 -2.010629654 -1.465376616  
H -3.851886034 -1.084218264 1.560182571  
C -3.148684978 -1.432714343 0.808760226  
C -1.360859156 -2.345883369 -1.139228344  
C -1.849170208 -1.768241048 1.198312402  
C -0.927317619 -2.214292526 0.208510175  
P 1.816275835 -0.462978244 0.465977728  
C 0.349109083 -2.879822493 0.668157220  
C 1.587314844 -2.239038467 0.912267268  
H -0.714552343 -4.741546631 0.756789863  
C 0.236887604 -4.253607750 0.947053730  
C 2.635871887 -2.981180191 1.484701872  
H 3.575006485 -2.492657900 1.719420433  
C 1.296449184 -4.981083870 1.481381774  
C 2.500131130 -4.337422848 1.767213702  
H 1.176368713 -6.040740013 1.689643264  
H 3.328128338 -4.886149883 2.207341194  
C 3.203037262 -0.407622993 -0.794618666  
C 4.591511250 -0.912723362 -0.357092232  
C 2.791071415 -1.075877905 -2.118413925  
H 3.278131485 0.671863794 -0.982685566  
C 5.636773109 -0.614107013 -1.447265387  
H 4.550069332 -1.997295380 -0.199495658  
H 4.902855873 -0.459681541 0.590652585  
C 3.828950167 -0.797286391 -3.217565298  
H 2.705852747 -2.160118580 -1.962704659  
H 1.805344462 -0.719537437 -2.429898977  
C 5.234735966 -1.245364547 -2.789095879  
H 6.620402813 -0.982041121 -1.130208850  
H 5.731301785 0.474743575 -1.567362785  
H 3.532131910 -1.298723698 -4.146801949  
H 3.839969158 0.281534880 -3.430903196  
H 5.969696045 -0.995564699 -3.563779116  
H 5.246374130 -2.340413332 -2.686004162  
C 2.589086533 0.322995573 1.982367039  
C 3.218456268 1.698708296 1.671209574  
C 1.538703322 0.452005744 3.101984262

H 3.385958910 -0.350702375 2.326255560  
C 3.812964439 2.331792831 2.941380739  
H 2.452930927 2.363359690 1.259268880  
H 3.999517441 1.608632088 0.909018159  
C 2.126799822 1.100072384 4.365063667  
H 0.711444259 1.068202376 2.727978706  
H 1.121823788 -0.530254841 3.346009254  
C 2.756997824 2.464064121 4.048591614  
H 4.236068249 3.313135862 2.695475101  
H 4.645424366 1.711103559 3.305826664  
H 1.342172980 1.203420162 5.124586105  
H 2.892301798 0.434767932 4.791098118  
H 3.199630737 2.901073456 4.951927662  
H 1.970914602 3.155416012 3.712640047  
Pd -0.194324955 0.409630209 -0.335534334  
N -1.952944875 1.127154827 -1.118856192  
H -1.818816781 1.368116379 -2.099406958  
C 0.601571262 2.220297098 -0.682661653  
C 0.282176584 3.281252384 0.175047413  
C 1.473888636 2.447394133 -1.755101800  
C 0.860051215 4.539964199 -0.017211692  
H -0.431003988 3.137795925 0.982153416  
C 2.046494007 3.711381674 -1.945196152  
H 1.713366032 1.647093892 -2.450351715  
C 1.750339031 4.759094238 -1.071990371  
H 0.605727375 5.353476524 0.658537447  
H 2.723355293 3.872903109 -2.781710625  
H 2.197230101 5.738704205 -1.218815327  
C -2.674610853 2.124837399 -0.496407598  
C -3.214974880 3.230295181 -1.197098613  
C -2.953771114 2.046668291 0.888879240  
C -3.991435051 4.187349796 -0.549678862  
H -3.007923126 3.327193975 -2.261350393  
C -3.721369743 3.012592077 1.529613972  
H -2.563621283 1.200091362 1.436790347  
C -4.253467560 4.095382214 0.821178913  
H -4.388812065 5.022685528 -1.122245431  
H -3.910136938 2.916203022 2.597100496  
H -4.853559017 4.848505497 1.323191881  
C -0.425678611 -2.877177000 -2.218595982  
C -0.437049240 -2.001384735 -3.484198093  
C -0.751786053 -4.342370033 -2.564515829  
H 0.588232934 -2.855231524 -1.811636090  
H -0.307121307 -0.944708169 -3.231066465  
H 0.369471341 -2.300406694 -4.163309574  
H -1.379791141 -2.097692728 -4.033630371  
H -0.654838860 -4.988262653 -1.686325669  
H -1.777885318 -4.432574272 -2.938365459  
H -0.073504195 -4.718899727 -3.339143515  
C -1.481749296 -1.771646976 2.681454420  
C -2.108118773 -2.994930029 3.379390955  
C -1.856158853 -0.476688325 3.419086218  
H -0.397140235 -1.880735159 2.754998922  
H -1.775954247 -3.928349733 2.914881706  
H -1.826075196 -3.023054838 4.438270092  
H -3.201533794 -2.957339048 3.319371939  
H -1.409116030 0.395682514 2.938888311  
H -2.939872980 -0.322266340 3.454785347



H -1.496497273 -0.516151547 4.453558445  
C -5.017274857 -1.208315015 -0.890456021  
C -5.776769161 -2.489302397 -1.288718939  
C -5.112604618 -0.145769686 -1.999118328  
H -5.501664639 -0.795269251 0.004095646  
H -5.741899967 -3.238296032 -0.490313888  
H -6.827624798 -2.266187668 -1.505334496  
H -5.338577271 -2.938806295 -2.187652349  
H -4.626652241 0.782809079 -1.696861386  
H -4.635607243 -0.493307680 -2.922742605  
H -6.163187504 0.066629730 -2.228504419

=====  
1H-TS  
=====

H -2.846497059 -2.516574383 -2.564975739  
C -3.521969795 -1.762183070 -0.673063397  
C -2.579708576 -2.342015982 -1.526987314  
H -3.889110804 -1.129069448 1.338096023  
C -3.162205219 -1.568216443 0.659814954  
C -1.300394297 -2.695004702 -1.091855407  
C -1.894938231 -1.904423118 1.146981716  
C -0.940638959 -2.453882217 0.257488370  
P 1.735891700 -0.555979967 0.354383796  
C 0.350051492 -3.009352922 0.807362437  
C 1.576993823 -2.308101892 0.937072933  
H -0.660935879 -4.867414951 1.162978530  
C 0.282922298 -4.338828087 1.259934902  
C 2.664921999 -2.964042902 1.541091204  
H 3.600099325 -2.432734013 1.679474592  
C 1.378630280 -4.975728512 1.835869312  
C 2.577578306 -4.281105042 1.983920574  
H 1.291985154 -6.003958225 2.176333427  
H 3.438804388 -4.757579803 2.444417238  
C 3.097632170 -0.524403930 -0.942111850  
C 4.472605705 -1.098051071 -0.551138878  
C 2.632863522 -1.126098633 -2.279165983  
H 3.203954697 0.558149934 -1.101651549  
C 5.512440205 -0.828728735 -1.654450536  
H 4.380960941 -2.182358027 -0.410225570  
H 4.822904110 -0.679159641 0.399354279  
C 3.665218830 -0.868500531 -3.389107943  
H 2.487307787 -2.208476782 -2.162504911  
H 1.663865209 -0.700118899 -2.554984570  
C 5.053584576 -1.402553558 -3.004132748  
H 6.481431961 -1.255283356 -1.366566420  
H 5.662090778 0.256430149 -1.750747442  
H 3.325702190 -1.322817206 -4.328135967  
H 3.731163740 0.214431852 -3.569266558  
H 5.785512924 -1.169175029 -3.787037134  
H 5.009669304 -2.499064445 -2.930263519  
C 2.552333117 0.314574540 1.813651204  
C 3.200698137 1.652050614 1.390647769  
C 1.512797236 0.543175399 2.928233624  
H 3.339099646 -0.344458520 2.206945419  
C 3.783202887 2.404112577 2.600158215  
H 2.451644421 2.282169342 0.899833083  
H 4.000067234 1.482032537 0.662370920

C 2.110186815 1.294538498 4.127904892  
H 0.684201419 1.127922893 2.513132095  
H 1.097889185 -0.415919185 3.256389141  
C 2.726682901 2.630939007 3.690027475  
H 4.199895859 3.361334562 2.263905764  
H 4.619473457 1.825430155 3.020915508  
H 1.332079530 1.456879377 4.884388447  
H 2.885141134 0.673798144 4.602052212  
H 3.166268110 3.153471947 4.548693657  
H 1.935722709 3.279362917 3.288533449  
Pd -0.242037490 0.363530546 -0.411479801  
N -1.653667688 1.666535139 -1.184427381  
H -1.720936418 1.903494120 -2.166586161  
C -0.013758738 2.415351629 -0.556935310  
C -0.193969622 3.173690319 0.623802841  
C 0.876912475 2.901091099 -1.541052341  
C 0.540744662 4.339189053 0.831130862  
H -0.882215679 2.822705984 1.388511539  
C 1.597185373 4.073222160 -1.316756248  
H 1.026053786 2.337948799 -2.458131790  
C 1.449664354 4.797412395 -0.128896058  
H 0.407936662 4.890506744 1.759791851  
H 2.294326067 4.418069363 -2.077769041  
H 2.020955086 5.705222130 0.040057082  
C -0.324373335 -3.346974134 -2.064535856  
C -0.296715081 -2.643768072 -3.432537556  
C -0.632810891 -4.847197533 -2.230998993  
H 0.676538467 -3.266849756 -1.630229354  
H -0.205331594 -1.560892701 -3.314695358  
H 0.550536752 -3.001519680 -4.028160572  
H -1.207097173 -2.843699455 -4.008114815  
H -0.546567619 -5.377416611 -1.277742743  
H -1.651907682 -4.991137028 -2.607635736  
H 0.061454128 -5.311041832 -2.941506147  
C -1.573878407 -1.685130715 2.620318651  
C -2.224319458 -2.775800228 3.492141485  
C -1.966559052 -0.278819531 3.106150627  
H -0.491587520 -1.776200533 2.738818169  
H -1.882185221 -3.772663832 3.195644617  
H -1.975040674 -2.629237413 4.549566269  
H -3.315768480 -2.751531601 3.393654823  
H -1.573575139 0.485241085 2.429321766  
H -3.053510904 -0.156054556 3.161955118  
H -1.563417196 -0.095177896 4.108391762  
C -4.882989883 -1.322588444 -1.188717723  
C -5.736932278 -2.522223711 -1.637161255  
C -4.742352009 -0.282409251 -2.316503525  
H -5.403627872 -0.832596481 -0.354729831  
H -5.868600368 -3.240380764 -0.821206927  
H -6.728224754 -2.194188356 -1.970329285  
H -5.261756897 -3.049613476 -2.472470760  
H -4.101385593 0.545231700 -1.997752190  
H -4.286234379 -0.728042483 -3.208078146  
H -5.723233700 0.112034805 -2.606103897  
H -2.320460558 2.208174944 -0.649237454

=====  
1H'-TS  
=====

```

=====
H -2.904455185 -1.720517039 -2.448956490
C -3.453578711 -1.087993860 -0.475472569
C -2.593427420 -1.666450381 -1.410449386
H -3.692207098 -0.594136119 1.592039466
C -3.030219793 -1.038019061 0.853000581
C -1.342278123 -2.178934813 -1.053862214
C -1.786226988 -1.527084827 1.262326360
C -0.926642656 -2.106878042 0.297315806
P 1.970098138 -0.542627931 0.386439860
C 0.311612099 -2.833884001 0.761220574
C 1.609262943 -2.280446053 0.902041733
H -0.885941684 -4.590980053 1.036074638
C 0.110472120 -4.171713829 1.143064260
C 2.627157688 -3.077055693 1.457640767
H 3.614097834 -2.653892994 1.608268619
C 1.137153149 -4.952594280 1.666299701
C 2.404422760 -4.397950172 1.835212469
H 0.943207443 -5.982505798 1.953064799
H 3.213383675 -4.985497475 2.260459900
C 3.323327303 -0.629336357 -0.918303013
C 4.669584274 -1.269501567 -0.530083954
C 2.810573816 -1.238147974 -2.235701799
H 3.489698648 0.442046344 -1.104221940
C 5.706672668 -1.067598820 -1.650484562
H 4.524305344 -2.346076250 -0.375775367
H 5.052108288 -0.857512712 0.410322309
C 3.838331223 -1.056815624 -3.364807844
H 2.619854212 -2.310265303 -2.088253021
H 1.858856201 -0.776083708 -2.512747526
C 5.205267429 -1.645855665 -2.983338833
H 6.659449577 -1.531004667 -1.366069555
H 5.902734756 0.008004916 -1.768653512
H 3.464603424 -1.518814087 -4.286952496
H 3.951102972 0.017008901 -3.574203491
H 5.937390327 -1.462949395 -3.779225111
H 5.110878944 -2.737338066 -2.886278152
C 2.854565620 0.198383540 1.872376561
C 3.594362259 1.500630498 1.495521307
C 1.832637191 0.459047049 2.995877981
H 3.590626478 -0.532576561 2.235164881
C 4.222176075 2.174656630 2.727896690
H 2.891470909 2.194702625 1.028989911
H 4.379310608 1.302502155 0.758471072
C 2.476435661 1.127255321 4.220241547
H 1.048758268 1.115235329 2.600095749
H 1.349960089 -0.478859514 3.290392160
C 3.180361271 2.433075666 3.825387239
H 4.694803238 3.115266323 2.420334816
H 5.020785809 1.533369660 3.130451441
H 1.709114075 1.315881371 4.981602669
H 3.206694841 0.439713061 4.672314644
H 3.651742935 2.896783352 4.700742245
H 2.434521675 3.144967794 3.446252823
Pd 0.152323171 0.627546370 -0.423630387
N -1.027086616 2.122376919 -1.294233203
H -0.798572779 2.434783220 -2.230375051
C 0.628237009 2.645978451 -0.452295601

```

```

C 0.460049272 3.367882252 0.746781707
C 1.631738544 3.050424576 -1.358991742
C 1.309421778 4.433753967 1.044762731
H -0.331322670 3.096815109 1.437061191
C 2.470950603 4.118899822 -1.041124344
H 1.767333388 2.511482716 -2.293456316
C 2.327746153 4.814922333 0.164634153
H 1.173791528 4.968700409 1.982451081
H 3.253007174 4.402861118 -1.742198348
H 2.985553503 5.644409180 0.406072915
C -2.126241446 2.798740149 -0.775978327
C -2.690116644 3.899821043 -1.450236082
C -2.694849491 2.406985283 0.450559676
C -3.798395395 4.561247826 -0.927471817
H -2.251652479 4.228959084 -2.390067816
C -3.792641640 3.082741737 0.973732233
H -2.279413223 1.546128392 0.960232377
C -4.358750820 4.161900997 0.288843751
H -4.222354889 5.402015209 -1.471113205
H -4.216689587 2.755149603 1.920249581
H -5.221132755 4.682698250 0.694995701
C -0.462285429 -2.831271648 -2.112409592
C -0.434484482 -2.038200617 -3.429824352
C -0.891847670 -4.289487839 -2.361513138
H 0.558368504 -2.852260351 -1.720878363
H -0.252406269 -0.975492597 -3.242683172
H 0.356667697 -2.418053865 -4.085696220
H -1.380181432 -2.125159502 -3.975804806
H -0.821413875 -4.885406971 -1.446459413
H -1.929177165 -4.329885483 -2.713003635
H -0.255774796 -4.757662296 -3.121874332
C -1.405975342 -1.463479877 2.737509727
C -2.145505667 -2.553366423 3.535269737
C -1.645220637 -0.074267551 3.354661465
H -0.336419880 -1.675791025 2.814818382
H -1.909923673 -3.549939156 3.149021149
H -1.861868978 -2.521783590 4.593506813
H -3.230233192 -2.412646055 3.469378233
H -1.163854837 0.707536399 2.761852264
H -2.712236404 0.163776740 3.425045967
H -1.233561873 -0.033843238 4.369448662
C -4.819840908 -0.549783170 -0.873698831
C -5.777796268 -1.707342386 -1.216480255
C -4.744739532 0.467975676 -2.025041103
H -5.225623608 -0.021539189 -0.000719314
H -5.866443157 -2.410794258 -0.381584048
H -6.778355598 -1.329069614 -1.455424666
H -5.413323402 -2.266575098 -2.086332560
H -4.087731361 1.302232862 -1.770262003
H -4.368761063 0.004632180 -2.944503069
H -5.741444111 0.869066358 -2.241625786

```

II

```

=====
C 2.023535490 4.617687702 4.881220341
C 3.102980137 5.518260002 4.996149540
C 2.840400457 6.870631695 5.246761322

```

|    |              |              |              |       |              |              |              |
|----|--------------|--------------|--------------|-------|--------------|--------------|--------------|
| C  | 1.543886662  | 7.365695953  | 5.389240265  | C     | 3.200372696  | 9.955361366  | -0.056732766 |
| C  | 0.484386802  | 6.460000038  | 5.244210243  | H     | 3.075515985  | 8.075338364  | 2.788684368  |
| C  | 0.697391272  | 5.100819111  | 4.991092205  | H     | 0.286083996  | 8.234741211  | -0.471867234 |
| C  | 2.280426025  | 3.129982233  | 4.885685921  | H     | 4.495317459  | 9.774492264  | 1.660044193  |
| C  | 2.489761829  | 2.294339895  | 3.763225555  | H     | 1.714161515  | 9.903099060  | -1.617746234 |
| C  | 2.713195086  | 0.922593951  | 3.987652302  | H     | 3.827620983  | 10.684242249 | -0.561265588 |
| C  | 2.728479862  | 0.369013071  | 5.264527798  | H     | -0.145272791 | 7.023616314  | 1.537032962  |
| C  | 2.522087336  | 1.194042444  | 6.369944572  | C     | -0.500860214 | 4.169812679  | 4.843285084  |
| C  | 2.305519581  | 2.554032087  | 6.170500278  | H     | -0.127286941 | 3.205772877  | 4.489156246  |
| H  | 3.675957203  | 7.559744358  | 5.348719597  | C     | -1.499689221 | 4.677026272  | 3.787997723  |
| H  | -0.536317885 | 6.819459915  | 5.349658012  | C     | -1.191148520 | 3.936412573  | 6.199021339  |
| H  | 2.885018826  | 0.267906368  | 3.137949944  | H     | -0.494369715 | 3.506288052  | 6.925669193  |
| H  | 2.902293682  | -0.695927203 | 5.393335819  | H     | -1.570140243 | 4.878228664  | 6.612979889  |
| H  | 2.529838562  | 0.785212755  | 7.376508713  | H     | -2.038837671 | 3.249933004  | 6.091269493  |
| H  | 2.146847010  | 3.204624176  | 7.025782108  | H     | -1.977403045 | 5.615294933  | 4.094031811  |
| P  | 2.445544004  | 2.930895090  | 2.010945320  | H     | -2.294717550 | 3.939655542  | 3.630271912  |
| C  | 1.303150773  | 1.652096748  | 1.217096329  | H     | -0.987028658 | 4.839163303  | 2.833748579  |
| C  | 1.207023382  | 1.877200484  | -0.305112064 | C     | 4.547030926  | 5.062583923  | 4.838198662  |
| C  | 0.223755255  | 0.895290673  | -0.964411914 | H     | 4.532909870  | 4.004602909  | 4.565360546  |
| C  | -1.163947582 | 0.966730714  | -0.311724871 | C     | 5.325767994  | 5.180736542  | 6.159898281  |
| C  | -1.069499612 | 0.717090964  | 1.200212002  | C     | 5.244141579  | 5.825957298  | 3.696924448  |
| C  | -0.093363054 | 1.699371576  | 1.865894079  | H     | 4.664097786  | 5.744132996  | 2.771368504  |
| H  | 1.732015729  | 0.653577924  | 1.386412740  | H     | 5.354688644  | 6.890096664  | 3.934245586  |
| H  | 2.193414688  | 1.772154331  | -0.770840228 | H     | 6.249009132  | 5.425501823  | 3.519096851  |
| H  | 0.880295694  | 2.910969019  | -0.484765679 | H     | 5.375492096  | 6.221035957  | 6.501321793  |
| H  | 0.154711619  | 1.105338693  | -2.039108276 | H     | 6.353043556  | 4.818528175  | 6.037958145  |
| H  | 0.614222705  | -0.128870070 | -0.869425297 | H     | 4.847626686  | 4.590633869  | 6.948870659  |
| H  | -1.591671467 | 1.965007387  | -0.485176474 | C     | 1.298310041  | 8.833196640  | 5.714965343  |
| H  | -2.058913708 | 0.802337348  | 1.667135954  | H     | 2.280580282  | 9.321082115  | 5.774202824  |
| H  | -0.727217078 | -0.313475847 | 1.376206160  | C     | 0.614847541  | 8.991189003  | 7.086096764  |
| H  | -0.015864013 | 1.480285168  | 2.936773777  | C     | 0.493289679  | 9.551219940  | 4.616036415  |
| H  | -0.482238770 | 2.722153425  | 1.776645899  | H     | 1.018461704  | 9.526270866  | 3.656438351  |
| H  | -1.845732331 | 0.245559335  | -0.779480338 | H     | -0.491447806 | 9.088234901  | 4.481455326  |
| C  | 4.123613358  | 2.390849352  | 1.290656567  | H     | 0.329573154  | 10.601804733 | 4.880513668  |
| C  | 5.289476871  | 2.336980104  | 2.297384977  | H     | -0.386406064 | 8.545710564  | 7.078935623  |
| C  | 6.594016552  | 1.886732936  | 1.617006063  | H     | 0.507251680  | 10.050084114 | 7.347315788  |
| C  | 6.958344936  | 2.799467564  | 0.437012911  | H     | 1.193406105  | 8.499420166  | 7.874497890  |
| C  | 5.799407005  | 2.884105444  | -0.567372501 |       |              |              |              |
| C  | 4.496749878  | 3.326937437  | 0.118798941  | ===== |              |              |              |
| H  | 3.977301359  | 1.375146627  | 0.891636968  | II'   |              |              |              |
| H  | 5.057997704  | 1.669531703  | 3.132279873  | ===== |              |              |              |
| H  | 5.438747406  | 3.335392475  | 2.722490072  | C     | 2.327710629  | 4.592135429  | 4.495004654  |
| H  | 7.407858372  | 1.866333127  | 2.352979422  | C     | 3.499806404  | 5.372174263  | 4.628714085  |
| H  | 6.473807335  | 0.855057657  | 1.254266739  | C     | 3.378048897  | 6.757085323  | 4.782490253  |
| H  | 7.176170349  | 3.807745218  | 0.818432093  | C     | 2.135634899  | 7.399616718  | 4.798996925  |
| H  | 6.046725750  | 3.577984095  | -1.380382061 | C     | 0.990615964  | 6.608717918  | 4.650969982  |
| H  | 5.649184704  | 1.897727847  | -1.031265378 | C     | 1.062147617  | 5.219744205  | 4.500741005  |
| H  | 3.681110859  | 3.383379459  | -0.608935118 | C     | 2.416962147  | 3.089057446  | 4.577675343  |
| H  | 4.610341549  | 4.344813824  | 0.515249372  | C     | 2.515636444  | 2.184496641  | 3.493572235  |
| H  | 7.871899128  | 2.444083214  | -0.055801362 | C     | 2.597304821  | 0.809438467  | 3.781010151  |
| Pd | 1.737532854  | 5.029657364  | 1.809452891  | C     | 2.582737684  | 0.320693284  | 5.084596157  |
| N  | 0.805729151  | 7.067151546  | 1.890122533  | C     | 2.480582952  | 1.214312077  | 6.151259899  |
| H  | 0.777572572  | 7.183792591  | 2.903433561  | C     | 2.397910833  | 2.579130173  | 5.889962196  |
| C  | 1.586667180  | 8.066158295  | 1.238636017  | H     | 4.278047562  | 7.357508659  | 4.890235901  |
| C  | 2.777648926  | 8.501761436  | 1.835760951  | H     | 0.012748104  | 7.082699776  | 4.669111729  |
| C  | 1.206164837  | 8.578864098  | -0.004847154 | P     | 2.567245960  | 2.753373623  | 1.718160033  |
| C  | 3.572861671  | 9.444367409  | 1.189548969  | C     | 1.152124643  | 1.793364882  | 0.882325888  |
| C  | 2.015326977  | 9.515481949  | -0.648213446 | C     | 0.689684868  | 2.564939976  | -0.375538528 |

|    |              |              |              |       |              |              |              |
|----|--------------|--------------|--------------|-------|--------------|--------------|--------------|
| C  | -0.398818731 | 1.797820449  | -1.143218756 | H     | 5.388644218  | 5.470565319  | 2.626280069  |
| C  | -1.602454066 | 1.491319776  | -0.240008876 | H     | 6.081661701  | 6.448846340  | 3.926075697  |
| C  | -1.159124732 | 0.742467642  | 1.025631189  | H     | 6.778406620  | 4.868134975  | 3.555118084  |
| C  | -0.064153016 | 1.511636615  | 1.785886168  | H     | 5.605349541  | 5.698693275  | 6.434807301  |
| H  | 1.571797252  | 0.826639712  | 0.563400924  | H     | 6.467551708  | 4.205770493  | 6.018905640  |
| H  | 1.536953211  | 2.784950972  | -1.032346368 | H     | 4.836739540  | 4.126090050  | 6.712267399  |
| H  | 0.303450376  | 3.542038918  | -0.056018293 | C     | 2.044895172  | 8.900349617  | 5.046535492  |
| H  | -0.714070618 | 2.377895355  | -2.019508123 | H     | 3.060430527  | 9.307650566  | 4.943077564  |
| H  | 0.019047797  | 0.854129016  | -1.524935365 | C     | 1.582412362  | 9.176930428  | 6.490217686  |
| H  | -2.080123663 | 2.437826395  | 0.052302249  | C     | 1.145525098  | 9.634556770  | 4.036177158  |
| H  | -2.016131401 | 0.566168070  | 1.688042402  | H     | 1.464681983  | 9.471165657  | 3.001945972  |
| H  | -0.772640646 | -0.248160347 | 0.743172407  | H     | 0.103975981  | 9.303305626  | 4.109889984  |
| H  | 0.230888397  | 0.951127470  | 2.677757502  | H     | 1.159319043  | 10.713527679 | 4.225846767  |
| H  | -0.475222498 | 2.466383696  | 2.133754253  | H     | 0.572040141  | 8.784001350  | 6.651551247  |
| H  | -2.357585192 | 0.911112070  | -0.784914255 | H     | 1.565957308  | 10.252757072 | 6.698729992  |
| C  | 4.063156605  | 1.782837152  | 1.085545540  | H     | 2.247518063  | 8.694733620  | 7.213784695  |
| C  | 5.334763050  | 2.148523808  | 1.873634696  | N     | 2.741804361  | 7.244501114  | 1.400663257  |
| C  | 6.574457169  | 1.414796591  | 1.336600423  | H     | 2.444096088  | 7.375076294  | 2.368192196  |
| C  | 6.776707172  | 1.683011055  | -0.161758915 | C     | 4.086302280  | 7.734469891  | 1.239820242  |
| C  | 5.518568516  | 1.302788496  | -0.955671251 | C     | 4.943540573  | 7.129196167  | 0.315428466  |
| C  | 4.271671295  | 2.029615879  | -0.422818780 | C     | 4.547160149  | 8.793528557  | 2.025367975  |
| H  | 3.858302355  | 0.711422205  | 1.230777740  | C     | 6.254366398  | 7.582581997  | 0.182130545  |
| H  | 5.198342800  | 1.917089343  | 2.935612917  | C     | 5.867518902  | 9.229937553  | 1.903373957  |
| H  | 5.490231991  | 3.232516050  | 1.799651146  | C     | 6.723394394  | 8.629110336  | 0.980255902  |
| H  | 7.461870670  | 1.719627023  | 1.905481100  | H     | 4.575212002  | 6.285475731  | -0.261357039 |
| H  | 6.455101490  | 0.332962573  | 1.497425675  | H     | 3.874675512  | 9.268089294  | 2.733329535  |
| H  | 6.987524986  | 2.752265453  | -0.310284972 | H     | 6.916818142  | 7.103111267  | -0.533253789 |
| H  | 5.652359486  | 1.529564381  | -2.020920515 | H     | 6.223720074  | 10.044297218 | 2.528362513  |
| H  | 5.362987995  | 0.216005936  | -0.884304225 | H     | 7.750569820  | 8.969672203  | 0.885713041  |
| H  | 3.392145157  | 1.704568982  | -0.989322662 | H     | 2.668540716  | 0.099796958  | 2.960780144  |
| H  | 4.369405270  | 3.111986160  | -0.586842239 | H     | 2.648535252  | -0.749194443 | 5.264666557  |
| H  | 7.648806095  | 1.133555055  | -0.537709117 | H     | 2.466280699  | 0.852882743  | 7.175816059  |
| Pd | 2.628126383  | 4.960813999  | 1.473503947  | H     | 2.318625450  | 3.284085989  | 6.712890625  |
| C  | 1.725077510  | 7.724570751  | 0.504992664  |       |              |              |              |
| C  | 2.013720036  | 8.192111015  | -0.780116975 | ===== |              |              |              |
| C  | 0.395291775  | 7.688152790  | 0.948426485  | IJ    |              |              |              |
| C  | 0.972240806  | 8.598980904  | -1.615707994 | ===== |              |              |              |
| C  | -0.633102417 | 8.099497795  | 0.107579134  | Pd    | 0.229048103  | 1.537163973  | 0.606278598  |
| C  | -0.353000373 | 8.554338455  | -1.184063792 | P     | 1.837583780  | -0.017241551 | 0.166295975  |
| H  | 3.039409876  | 8.237401009  | -1.127388000 | C     | 1.477710247  | -1.843141198 | 0.200657189  |
| H  | 0.181420118  | 7.313473225  | 1.944141150  | C     | 2.594219208  | -2.658704519 | 0.491483539  |
| H  | 1.206911087  | 8.956727982  | -2.614845276 | C     | 2.516662359  | -4.045899391 | 0.536394238  |
| H  | -1.659187555 | 8.061322212  | 0.463761151  | C     | 1.294067860  | -4.670890331 | 0.297815204  |
| H  | -1.156323075 | 8.871928215  | -1.842141509 | C     | 0.184694618  | -3.885190248 | 0.010904233  |
| C  | -0.222207651 | 4.417615414  | 4.329159737  | C     | 0.237891942  | -2.476401806 | -0.057427485 |
| H  | 0.057924248  | 3.381534815  | 4.121547699  | C     | -1.078590989 | -1.841608405 | -0.419126660 |
| C  | -1.041073084 | 4.918343544  | 3.125879765  | C     | -1.547351241 | -1.970559597 | -1.747992396 |
| C  | -1.057508588 | 4.414608002  | 5.621342659  | C     | -3.700638771 | -1.022827983 | -1.083756685 |
| H  | -0.483570665 | 3.998790264  | 6.456216335  | C     | -3.217608929 | -0.909092665 | 0.225185022  |
| H  | -1.364302993 | 5.430190563  | 5.897396088  | H     | -3.867403984 | -0.489833981 | 0.984667599  |
| H  | -1.964378119 | 3.811567307  | 5.496768951  | C     | -1.934788704 | -1.328605175 | 0.590708017  |
| H  | -1.419736385 | 5.933899403  | 3.289706230  | C     | -0.692508340 | -2.546912670 | -2.876927137 |
| H  | -1.908946395 | 4.271173000  | 2.952601433  | H     | 0.339777499  | -2.599711180 | -2.523258686 |
| H  | -0.425193876 | 4.927146435  | 2.220396996  | C     | -1.132012486 | -3.977998018 | -3.243328333 |
| C  | 4.883872509  | 4.733851433  | 4.612458229  | H     | -1.036205173 | -4.663185596 | -2.396911621 |
| H  | 4.763689518  | 3.702214241  | 4.272776604  | H     | -0.520792544 | -4.368476868 | -4.065293312 |
| C  | 5.482967377  | 4.687563896  | 6.029526711  | H     | -2.178833723 | -3.988695860 | -3.567155361 |
| C  | 5.836747169  | 5.425251961  | 3.622586489  | C     | -0.708293259 | -1.661726236 | -4.139476776 |

H -1.669056177 -1.726264596 -4.662107468  
H 0.064923503 -1.992806911 -4.841871262  
H -0.533714414 -0.609871864 -3.904112339  
C -5.085067749 -0.515997529 -1.458198547  
H -5.249633312 -0.767197669 -2.514949322  
C -6.196623325 -1.195425749 -0.640042663  
H -6.157521248 -2.284174919 -0.747039318  
H -7.183114052 -0.853158355 -0.971663535  
H -6.106009007 -0.959667742 0.426043689  
C -5.158021927 1.017601848 -1.323687911  
H -5.009538174 1.324735284 -0.282499045  
H -6.135239601 1.391354799 -1.649049401  
H -4.384728432 1.507444978 -1.924433827  
C -1.526164055 -1.323186517 2.066285849  
H -0.463546187 -1.063216329 2.121382236  
C -1.704046965 -2.727472782 2.684946299  
H -2.754025221 -3.037122250 2.623388529  
H -1.418499470 -2.711032867 3.742648840  
H -1.097483993 -3.485210180 2.184945107  
C -2.289023638 -0.299345642 2.920588493  
H -2.268706322 0.699477136 2.481242418  
H -1.820924640 -0.222099215 3.905771732  
H -3.331564903 -0.604622126 3.072688818  
C -0.025073402 1.920429111 -1.321370006  
C 0.779540300 2.871427536 -1.962564588  
H 1.681230426 3.249636650 -1.487710953  
C 0.401467621 3.366011858 -3.215988159  
H 1.021616340 4.113760948 -3.704625607  
C -0.764170766 2.907456160 -3.835529804  
C -1.561112285 1.960833549 -3.187575102  
H -2.470654964 1.594107270 -3.657306433  
C -1.191799045 1.458472133 -1.935018778  
H -1.814997435 0.722929418 -1.447208405  
C 3.060670853 0.232109919 1.570328712  
C 3.525376558 1.703644395 1.638304472  
C 2.515965939 -0.254092366 2.929775953  
H 3.937212706 -0.378559351 1.319802999  
C 4.572712898 1.887284517 2.749577045  
H 2.660850525 2.342320442 1.852525711  
H 3.937785864 2.025107145 0.673106015  
C 3.568644285 -0.050143030 4.032500267  
H 1.615055323 0.314385802 3.181838989  
H 2.235783815 -1.311523199 2.869129658  
C 4.024063587 1.415023685 4.104172230  
H 4.868268490 2.941982508 2.800867558  
H 5.480212688 1.316307664 2.500553370  
H 3.152675629 -0.369481266 4.995348454  
H 4.439342976 -0.694400549 3.835445642  
H 4.782605648 1.541574717 4.886349678  
H 3.166444778 2.042541504 4.380571365  
C 2.838293076 0.252210468 -1.400269628  
C 4.303308964 -0.230050981 -1.391783237  
C 2.106813908 -0.320428759 -2.626505375  
H 2.848252773 1.344372034 -1.490270257  
C 5.004413605 0.210226536 -2.692545652  
H 4.331798077 -1.324729562 -1.316255450  
H 4.852698803 0.171007276 -0.534166813  
C 2.789986372 0.125646576 -3.926680803

H 2.122521639 -1.415755510 -2.562336445  
H 1.061669946 -0.011769594 -2.622835398  
C 4.267666340 -0.292960376 -3.943929434  
H 6.042009354 -0.145152405 -2.688992023  
H 5.049530506 1.308732152 -2.714819431  
H 2.258324385 -0.299045444 -4.786385536  
H 2.706310272 1.218006492 -4.013201237  
H 4.763499260 0.077625528 -4.849235058  
H 4.328679562 -1.390468955 -3.977984428  
C -2.856612682 -1.572265029 -2.045443773  
H -3.220690012 -1.670976281 -3.065079927  
H -1.048274279 3.287506104 -4.812621117  
Cl -0.026531890 2.350098610 2.853991270  
H -0.776805580 -4.357118130 -0.161950096  
H 1.203072071 -5.752376080 0.338471472  
H 3.405092955 -4.627360344 0.765140593  
H 3.554465055 -2.202985525 0.697536349

=====  
1K  
=====

C 1.469178200 -0.286141783 3.236603260  
C 0.141195819 -0.629025578 2.907837868  
C -0.098302037 -1.865779996 2.296972990  
C 0.927297592 -2.765820026 2.007060766  
C 2.235681295 -2.399592161 2.335963488  
C 2.529751062 -1.176712632 2.944130898  
C 1.769778490 0.929719508 4.062548637  
C 2.136165857 2.209342957 3.597257614  
C 2.529642820 3.177160740 4.548842907  
C 2.533951283 2.919011354 5.914487362  
C 2.118507147 1.670754433 6.377787590  
C 1.751405835 0.700015068 5.453402996  
H -1.116974831 -2.141300917 2.038924932  
H 3.047830343 -3.084969997 2.111369610  
P 2.216605902 2.884254217 1.866193056  
C 1.227310658 1.902323484 0.605250716  
C 1.873861790 0.620463312 0.036514997  
C 0.873211622 -0.129462853 -0.862441003  
C 0.348173469 0.756042957 -2.001729250  
C -0.220064163 2.079101324 -1.463915348  
C 0.807429433 2.805972815 -0.582216620  
H 0.320303887 1.634226918 1.157934904  
H 2.213119030 -0.043244757 0.828180432  
H 2.753179312 0.892492294 -0.561043322  
H 1.355572701 -1.027777672 -1.266812921  
H 0.038184781 -0.479209393 -0.242378816  
H 1.174009681 0.980467856 -2.692376375  
H -0.522432387 2.729999781 -2.293498278  
H -1.124648809 1.882929921 -0.870322704  
H 0.412895411 3.758858919 -0.228397146  
H 1.688913226 3.050839901 -1.186384916  
H -0.411358476 0.219921216 -2.583817482  
C 4.013035297 2.616473198 1.388573885  
C 5.027988911 3.060835361 2.462385654  
C 6.463948727 2.728168964 2.023237467  
C 6.796495914 3.356884956 0.663712680  
C 5.788925171 2.903700829 -0.400810272

C 4.347115040 3.239593744 0.015894659  
H 4.075811863 1.522336125 1.301505089  
H 4.818282127 2.567037582 3.416054487  
H 4.929100037 4.140136242 2.617412567  
H 7.166577816 3.074236393 2.791043997  
H 6.582347870 1.635990262 1.956896186  
H 6.756042480 4.450728893 0.753767550  
H 6.007935047 3.376980543 -1.365543723  
H 5.883791924 1.817483783 -0.552700222  
H 3.658061266 2.878362894 -0.752844512  
H 4.221011639 4.324669361 0.085206054  
H 7.818028450 3.096061945 0.360285550  
Pd 1.424751282 5.033135414 2.039052248  
C 3.978144407 -0.831530690 3.285967827  
H 4.032964706 0.246155068 3.467253923  
C 4.955379963 -1.148058891 2.139907122  
C 4.416290283 -1.536170363 4.584040642  
H 3.780493736 -1.243412137 5.424754143  
H 4.351583958 -2.624543667 4.472462654  
H 5.452021122 -1.280016422 4.834765434  
H 5.066331863 -2.226187229 1.982053041  
H 5.948595047 -0.749636233 2.373042822  
H 4.626235008 -0.705908716 1.194296002  
C -1.023513436 0.300986111 3.236861467  
H -0.633192182 1.320784092 3.309816599  
C -1.636888742 -0.046778735 4.607511997  
C -2.119366169 0.307000041 2.158258677  
H -1.706457138 0.503482699 1.164530754  
H -2.657571077 -0.646338940 2.116112471  
H -2.846833229 1.091554523 2.378194332  
H -2.032748699 -1.069154024 4.605557442  
H -2.457665682 0.640727997 4.839094639  
H -0.896321237 0.029483514 5.408250809  
C 0.627707064 -4.098369598 1.336024404  
H -0.460890979 -4.160988808 1.205177546  
C 1.060958266 -5.287484646 2.212708712  
C 1.270806432 -4.179326057 -0.061140489  
H 0.934065163 -3.355254650 -0.697963774  
H 2.363368273 -4.124804974 0.006042569  
H 1.013029099 -5.123170853 -0.554792345  
H 2.146662235 -5.294394493 2.361349106  
H 0.784323394 -6.237507343 1.741973639  
H 0.589318514 -5.243196011 3.199555397  
H 1.455988050 -0.287435979 5.795763493  
H 2.093505144 1.450562239 7.441180229  
H 2.848295689 3.694124937 6.607388020  
H 2.826640606 4.163526535 4.201730728  
C -0.383477956 4.238431931 2.528492689  
C -0.652715564 3.964124203 3.880510569  
C -1.460345745 4.195328236 1.627267718  
C -1.951340675 3.681417942 4.318520546  
C -2.761611700 3.922586441 2.064578772  
C -3.014950991 3.663377047 3.413265705  
H 0.150288522 3.970518589 4.609616280  
H -1.305415988 4.399227142 0.571863413  
H -2.128480673 3.479596615 5.372341156  
H -3.576383114 3.908343792 1.344170451  
H -4.024496078 3.448616743 3.752754450

Cl 3.535980701 6.234758854 1.752060652  
O 0.512258291 7.125692844 2.329150438  
C -0.834925771 7.522812366 2.017574787  
C 1.061117411 7.955540180 3.376581430  
C -1.709970236 7.467397213 3.264731646  
H -1.198293567 6.837056160 1.251295447  
H -0.804072618 8.544631004 1.613324881  
O -1.154494762 8.264071465 4.309851170  
H -2.702342272 7.876185894 3.047413349  
H -1.820045710 6.424263477 3.589979172  
C 0.176380217 7.849358559 4.608932495  
H 0.543019652 8.506309509 5.404434681  
H 0.183451191 6.808923244 4.973997116  
H 2.080075979 7.603952408 3.542958975  
H 1.091591358 8.993105888 3.016636372

=====  
2  
=====

C 2.589728117 -0.162509039 0.680670381  
C 2.551596880 -1.455604911 1.269150615  
C 3.229115725 -2.509159327 0.648695886  
C 3.944126129 -2.339795828 -0.540977836  
C 3.916160583 -1.080130935 -1.138769746  
C 3.254822254 0.009566412 -0.560191572  
C 2.261646032 1.040747166 1.541107178  
C 0.994114876 1.684479833 1.602612257  
C 0.799504578 2.751419783 2.511878967  
C 1.869557858 3.144277811 3.331160069  
C 3.136245728 2.560655832 3.249218702  
C 3.333147287 1.499635935 2.347547531  
H 3.219249010 -3.485959768 1.124839067  
H 4.435112953 -0.938740432 -2.083301306  
P -0.348854065 1.033486962 0.479443938  
Pd 0.289602995 -0.794200301 -0.806338489  
C -1.845752001 0.755019844 1.614639997  
C -2.937858820 -0.024184357 0.866455615  
C -1.462945104 0.013474164 2.901865959  
H -2.250415325 1.735979557 1.881303191  
H -2.565263271 -0.997057855 0.534250557  
H -3.302718401 0.511569321 -0.014146259  
H -1.093011022 -0.989903212 2.674605846  
H -0.692648649 0.538949251 3.473618031  
C -0.946026027 2.510527611 -0.569156468  
C 0.162207335 3.529538155 -0.867857695  
C -1.556889892 2.007219076 -1.889724135  
H -1.741971850 3.007677794 -0.000162561  
H 0.950572014 3.075231552 -1.473940611  
H 0.624190211 3.932747841 0.036301095  
H -0.787878335 1.543429136 -2.515172482  
H -2.340203762 1.261581659 -1.735024452  
C 0.207854986 -2.472835541 -2.211238384  
C -0.998525679 -1.750490427 -2.466693878  
C 0.182979390 -3.596263647 -1.336924434  
C -2.216215134 -2.243833065 -1.927906394  
H -1.019410968 -1.008690834 -3.257931948  
C -1.019516230 -4.011464596 -0.785146117  
H 1.106497288 -4.123126507 -1.130790472

C -2.229372978 -3.357245445 -1.105051041  
H -3.141599894 -1.734404922 -2.181601286  
H -1.024734616 -4.862341404 -0.109291911  
Cl 1.558839321 -2.342317581 -3.386928558  
H -3.167082787 -3.726658583 -0.700098753  
C 3.303781271 1.365486026 -1.255625606  
H 2.699774027 2.060286283 -0.665676534  
C 2.691340208 1.294254780 -2.666521072  
C 4.734424114 1.930948377 -1.306596994  
H 5.158049107 2.029750109 -0.303126335  
H 5.396234035 1.279137135 -1.887674809  
H 4.740990639 2.920343161 -1.777942181  
H 3.265709162 0.631236374 -3.321764231  
H 2.671725035 2.288288355 -3.128737450  
H 1.669022322 0.904403329 -2.624173403  
C 1.826965809 -1.708479404 2.588130474  
H 1.242479682 -0.815289378 2.818035603  
C 2.813818932 -1.918961883 3.751398325  
C 0.843439043 -2.887879848 2.482173681  
H 0.159387276 -2.753970861 1.638953209  
H 1.367976785 -3.839062929 2.337385893  
H 0.254707962 -2.978272676 3.402666330  
H 3.461507320 -2.783295155 3.565235376  
H 2.274162292 -2.098180294 4.688820839  
H 3.454006672 -1.043617845 3.891586781  
C 4.757252216 -3.477690697 -1.140379786  
H 5.177788734 -3.114750862 -2.087573528  
C 3.901349783 -4.716145515 -1.460484028  
C 5.933627129 -3.848853111 -0.216057926  
H 6.563540459 -2.977574348 -0.008862799  
H 5.569294930 -4.232464790 0.744065881  
H 6.558856487 -4.625449657 -0.671310246  
H 3.436336517 -5.122690201 -0.554490507  
H 4.518730164 -5.509828091 -1.896531940  
H 3.109078407 -4.470193386 -2.172214746  
H -2.345209837 -0.098041929 3.543808937  
H -1.991889954 2.849356890 -2.443149567  
H -0.249994665 4.367907047 -1.442118645  
H -3.796383858 -0.188282922 1.530158639  
C -0.498621732 3.511504412 2.681387424  
H -0.297870606 4.501487255 3.093546152  
H -1.035263300 3.637481928 1.744074464  
H -1.170653105 2.998383522 3.379018545  
C 4.259732723 3.064587355 4.122232437  
H 3.962239504 3.968358517 4.654065609  
H 4.562237740 2.309668541 4.859189034  
H 5.150021076 3.295134544 3.527165890  
C 4.718817234 0.885079205 2.295477152  
H 5.042857647 0.559574544 3.290883780  
H 4.781957626 0.029239165 1.628163099  
H 5.455090046 1.625177979 1.959149241  
O 1.674715042 4.183481693 4.230762959  
C 1.212788463 3.751402855 5.510056019  
H 0.244864389 3.237683296 5.437272072  
H 1.934413552 3.074934006 5.987714767  
H 1.098574519 4.649054050 6.122566223

2-TS

=====

C 2.088110924 4.384390354 4.716337204  
C 3.236587763 5.202454567 4.878879547  
C 3.073804855 6.534304619 5.272323608  
C 1.817039490 7.096477032 5.502201557  
C 0.695257187 6.287860870 5.299161911  
C 0.801988840 4.948785782 4.913624763  
C 2.263283968 2.881404161 4.668963909  
C 2.359763145 2.104253054 3.478531837  
C 2.589692593 0.710136414 3.583264828  
C 2.730067492 0.140752926 4.859367371  
C 2.591827154 0.878051102 6.037237644  
C 2.358095407 2.260947466 5.939878941  
H 3.955621481 7.154823303 5.411472797  
H -0.294389546 6.710545063 5.450037956  
P 2.211235523 2.991240740 1.832062721  
C 0.764650702 2.161349535 0.904476583  
C 0.140288427 3.157428741 -0.087531246  
C -0.321543902 1.594334602 1.828727126  
H 1.199899912 1.337025166 0.324492157  
H 0.875906765 3.604088783 -0.759432614  
H -0.341316879 3.979784966 0.451057047  
H 0.064260997 0.866219401 2.545657635  
H -0.805915236 2.395431280 2.392601490  
C 3.687080860 2.381343365 0.816357315  
C 5.003641129 2.564989090 1.579405069  
C 3.731374502 3.113073587 -0.533439815  
H 3.545040369 1.316289425 0.618662179  
H 5.006299973 2.022692204 2.530363560  
H 5.187526703 3.622330427 1.787509918  
H 2.860266685 2.887661219 -1.155122161  
H 3.779449463 4.195879459 -0.399006963  
Pd 2.024271727 5.291847706 2.051215887  
C -0.467375100 4.127658367 4.715944767  
H -0.168621734 3.137499571 4.360322475  
C -1.377024293 4.756242275 3.643077612  
C -1.235466361 3.931049585 6.034968376  
H -0.614912808 3.435820341 6.786964893  
H -1.559859514 4.892331600 6.449054241  
H -2.129053593 3.317501545 5.873211861  
H -1.759573102 5.731334209 3.964054823  
H -2.240809917 4.111227512 3.442868233  
H -0.826665044 4.907713413 2.708992481  
C 4.642685413 4.653643131 4.659533978  
H 4.544975281 3.673691750 4.186822414  
C 5.387044430 4.451071262 5.992431164  
C 5.462298870 5.541253090 3.705862761  
H 4.916885853 5.709326267 2.771976471  
H 5.683060646 6.518574238 4.148360729  
H 6.420281887 5.064329624 3.468956947  
H 5.483185768 5.398674965 6.534569740  
H 6.395647049 4.058741093 5.817021847  
H 4.857457161 3.745999575 6.638931751  
C 1.682819247 8.535851479 5.976925850  
H 2.699063301 8.935380936 6.095768929  
C 0.991024256 8.608171463 7.351139069  
C 0.954377830 9.420880318 4.948983192

|    |              |              |              |    |              |             |              |
|----|--------------|--------------|--------------|----|--------------|-------------|--------------|
| H  | 1.483747959  | 9.428077698  | 3.992686987  | C  | 0.769645214  | 2.223938942 | 0.873345375  |
| H  | -0.062089197 | 9.055174828  | 4.764955521  | C  | 0.162712321  | 3.173204899 | -0.167556137 |
| H  | 0.878843069  | 10.452903748 | 5.310809135  | C  | -0.331722260 | 1.685524583 | 1.795957088  |
| H  | -0.041623153 | 8.246493340  | 7.290901184  | H  | 1.217606783  | 1.377243996 | 0.339385778  |
| H  | 0.960876405  | 9.640748978  | 7.716930866  | H  | 0.901875556  | 3.569782257 | -0.864010036 |
| H  | 1.516617298  | 7.996266842  | 8.091410637  | H  | -0.312409043 | 4.025875568 | 0.326711744  |
| C  | 2.306626797  | 6.715421677  | 0.333669633  | H  | 0.044646278  | 1.024123430 | 2.578785658  |
| C  | 3.681457520  | 6.970213890  | 0.173246428  | H  | -0.871806204 | 2.505306005 | 2.273871899  |
| C  | 1.503785849  | 6.405388832  | -0.779122293 | C  | 3.715533257  | 2.402769566 | 0.828219533  |
| C  | 4.261881828  | 6.788790226  | -1.081913471 | C  | 5.019261837  | 2.910319090 | 1.456282973  |
| C  | 2.108197451  | 6.224600792  | -2.019398212 | C  | 3.643800259  | 2.688420057 | -0.680642307 |
| C  | 3.487038374  | 6.408592224  | -2.181152821 | H  | 3.692618370  | 1.319124699 | 0.951158464  |
| H  | 4.273235321  | 7.290243149  | 1.023914337  | H  | 5.122925758  | 2.569273472 | 2.490808964  |
| H  | 0.435118318  | 6.277683258  | -0.650222957 | H  | 5.071036339  | 4.000384331 | 1.450358748  |
| H  | 5.330452919  | 6.953123569  | -1.198542833 | H  | 2.770429611  | 2.224201441 | -1.147370100 |
| H  | 1.493192077  | 5.942994595  | -2.870929480 | H  | 3.625874281  | 3.755300999 | -0.900450468 |
| H  | 3.946574688  | 6.275894165  | -3.156202078 | Pd | 2.070186377  | 5.357343674 | 2.129791975  |
| Cl | 1.455466986  | 7.689863682  | 1.780737877  | C  | -0.509315431 | 4.241802216 | 4.519454002  |
| O  | 2.970165968  | -1.223778248 | 4.957281590  | H  | -0.195490345 | 3.271095753 | 4.127720833  |
| C  | 4.356735706  | -1.560849667 | 4.976055145  | C  | -1.390178800 | 4.923507214 | 3.454973936  |
| H  | 4.865109921  | -1.229371667 | 4.060877800  | C  | -1.311013103 | 3.974292517 | 5.806107521  |
| H  | 4.864878654  | -1.113775134 | 5.841217518  | H  | -0.709833086 | 3.437901020 | 6.545645237  |
| H  | 4.415417194  | -2.649662495 | 5.046036243  | H  | -1.650529027 | 4.909668922 | 6.263805866  |
| C  | 2.693332195  | -0.248227835 | 2.415022850  | H  | -2.197132587 | 3.368403673 | 5.585499287  |
| H  | 3.727091074  | -0.334905535 | 2.059424162  | H  | -1.763277888 | 5.890950680 | 3.805968046  |
| H  | 2.379374981  | -1.245101929 | 2.728736401  | H  | -2.258057833 | 4.298735142 | 3.213771582  |
| H  | 2.078270197  | 0.049767718  | 1.570126653  | H  | -0.823732555 | 5.110200405 | 2.537115097  |
| C  | 2.694202423  | 0.190723732  | 7.377612591  | C  | 4.604127884  | 4.808843613 | 4.631036282  |
| H  | 1.840254784  | 0.440182745  | 8.016395569  | H  | 4.520484924  | 3.882675648 | 4.058056831  |
| H  | 2.724158525  | -0.892309785 | 7.256604671  | C  | 5.306793690  | 4.469461918 | 5.958699226  |
| H  | 3.595115185  | 0.504339874  | 7.920341492  | C  | 5.453030109  | 5.790052891 | 3.801919699  |
| C  | 2.222409487  | 3.034190416  | 7.238917828  | H  | 4.910452843  | 6.125073433 | 2.914628983  |
| H  | 1.331184745  | 2.710214853  | 7.790517330  | H  | 5.718394279  | 6.682647228 | 4.378815651  |
| H  | 3.077500582  | 2.846885920  | 7.898528099  | H  | 6.387674809  | 5.311283112 | 3.488132954  |
| H  | 2.145506859  | 4.108816624  | 7.090087891  | H  | 5.351523399  | 5.348848343 | 6.610945225  |
| H  | -0.619313657 | 2.649923801  | -0.695716023 | H  | 6.333692074  | 4.133328438 | 5.774143696  |
| H  | -1.096163034 | 1.102029681  | 1.228719592  | H  | 4.782494545  | 3.675197840 | 6.496390820  |
| H  | 4.620745659  | 2.799350262  | -1.093982816 | C  | 1.580114603  | 8.541722298 | 6.176281929  |
| H  | 5.841145992  | 2.193313360  | 0.976389587  | H  | 2.548530579  | 9.044536591 | 6.056166172  |

=====  
2A  
=====

|   |              |             |             |   |              |              |              |
|---|--------------|-------------|-------------|---|--------------|--------------|--------------|
| C | 2.049388885  | 4.512553215 | 4.587550163 | H | -0.485163867 | 9.003736496  | 5.609465599  |
| C | 3.189325094  | 5.332053185 | 4.854124546 | H | 0.542016149  | 10.420128822 | 5.841729641  |
| C | 3.000016689  | 6.616399765 | 5.356029510 | H | 0.326015532  | 7.935482025  | 7.856642723  |
| C | 1.727992415  | 7.149287701 | 5.586283684 | H | 1.218004942  | 9.442612648  | 8.134909630  |
| C | 0.620318294  | 6.357568264 | 5.284637928 | H | 2.060163736  | 7.880756855  | 8.210702896  |
| C | 0.748510182  | 5.058013439 | 4.789379597 | C | 2.554131985  | 5.873984337  | 0.246976942  |
| C | 2.239634037  | 3.009554625 | 4.597139835 | C | 3.900547504  | 6.113044739  | -0.046380132 |
| C | 2.347197533  | 2.196583509 | 3.437938690 | C | 1.585659742  | 6.101459026  | -0.733544469 |
| C | 2.551370621  | 0.802116632 | 3.576360703 | C | 4.280188560  | 6.515009403  | -1.330904841 |
| C | 2.689383507  | 0.275424570 | 4.870941162 | C | 1.970963717  | 6.498232841  | -2.018043995 |
| C | 2.546401501  | 1.049200296 | 6.025501251 | C | 3.318219662  | 6.694914818  | -2.325131178 |
| C | 2.311653376  | 2.428417206 | 5.887536526 | H | 4.663312912  | 6.000502586  | 0.715851426  |
| H | 3.867884636  | 7.238965034 | 5.554049492 | H | 0.532842278  | 5.993988037  | -0.501279652 |
| H | -0.375530601 | 6.764318466 | 5.426895142 | H | 5.331587791  | 6.689313412  | -1.547601938 |
| P | 2.221897602  | 3.048196793 | 1.785238862 | H | 1.209315777  | 6.665830612  | -2.776056767 |
|   |              |             |             | H | 3.613557339  | 7.004272938  | -3.324104309 |



|    |              |              |              |
|----|--------------|--------------|--------------|
| Cl | 1.748116493  | 7.703193665  | 2.379199743  |
| O  | 2.915071726  | -1.086771011 | 5.002890110  |
| C  | 4.298305511  | -1.435797215 | 5.072063923  |
| H  | 4.841536045  | -1.110005021 | 4.175041676  |
| H  | 4.778885841  | -0.990706086 | 5.953458786  |
| H  | 4.344168186  | -2.524692535 | 5.146326065  |
| C  | 2.595570326  | -0.213312984 | 2.451032162  |
| H  | 3.626186132  | -0.471908420 | 2.178786755  |
| H  | 2.121477365  | -1.140191913 | 2.780686617  |
| H  | 2.088495731  | 0.121673159  | 1.550640345  |
| C  | 2.629138231  | 0.399127007  | 7.385319710  |
| H  | 1.777858734  | 0.684438050  | 8.011940002  |
| H  | 2.637748957  | -0.687387586 | 7.295718193  |
| H  | 3.534296274  | 0.710295022  | 7.922226906  |
| C  | 2.139828205  | 3.237335205  | 7.159487724  |
| H  | 1.216968656  | 2.947733641  | 7.676798344  |
| H  | 2.960371733  | 3.048609495  | 7.860093117  |
| H  | 2.094444513  | 4.309263229  | 6.983727455  |
| H  | -0.605379105 | 2.643453836  | -0.743834555 |
| H  | -1.058195949 | 1.123713732  | 1.197491169  |
| H  | 4.531528473  | 2.260845184  | -1.161939383 |
| H  | 5.877654552  | 2.528681755  | 0.891170740  |

2B

|    |              |              |              |
|----|--------------|--------------|--------------|
| C  | 3.823462486  | 0.233710736  | 2.079045296  |
| C  | 3.082601309  | -0.642753303 | 1.252980113  |
| C  | 3.769214153  | -1.460084796 | 0.346689641  |
| C  | 5.156229019  | -1.411064506 | 0.211548090  |
| C  | 5.864037037  | -0.509908319 | 1.015694857  |
| C  | 5.231804371  | 0.308719993  | 1.955176592  |
| C  | 3.092890739  | 0.925890267  | 3.194674253  |
| C  | 2.489084959  | 2.209855080  | 3.089972258  |
| C  | 1.657728910  | 2.674085379  | 4.154980183  |
| C  | 1.463294387  | 1.831053853  | 5.265790939  |
| C  | 2.113260746  | 0.604002118  | 5.414000988  |
| C  | 2.932915926  | 0.148307800  | 4.368844509  |
| H  | 3.206992388  | -2.142088890 | -0.286169887 |
| H  | 6.942281723  | -0.445899606 | 0.906261504  |
| P  | 2.706068754  | 3.392494440  | 1.642247081  |
| C  | 1.188915491  | 3.107627630  | 0.555449843  |
| C  | 1.137265325  | 4.064241886  | -0.646309435 |
| C  | -0.165733755 | 3.103633881  | 1.272685528  |
| H  | 1.385425687  | 2.089017630  | 0.198801354  |
| H  | 2.028239489  | 4.016546726  | -1.273153782 |
| H  | 1.002717257  | 5.094280720  | -0.307630002 |
| H  | -0.179269984 | 2.451904535  | 2.150142431  |
| H  | -0.446410507 | 4.118680000  | 1.566796422  |
| C  | 4.149241924  | 3.027957439  | 0.462929487  |
| C  | 4.677061558  | 4.331546783  | -0.171813205 |
| C  | 3.910563231  | 2.001214504  | -0.656463504 |
| H  | 4.921565533  | 2.657242537  | 1.129893661  |
| H  | 5.100317478  | 5.004662991  | 0.568314910  |
| H  | 3.904716492  | 4.873518944  | -0.722292006 |
| H  | 3.448637962  | 1.081774473  | -0.314316034 |
| H  | 3.302799463  | 2.421142578  | -1.461991668 |
| Pd | 2.986834288  | 5.516025543  | 2.415590048  |

|    |              |              |              |
|----|--------------|--------------|--------------|
| C  | 6.060105801  | 1.264240503  | 2.817741394  |
| H  | 5.409150600  | 2.088463306  | 3.121445656  |
| C  | 7.259393215  | 1.881725907  | 2.071501017  |
| C  | 6.556966305  | 0.601355553  | 4.116421700  |
| H  | 5.726402283  | 0.314183116  | 4.762484074  |
| H  | 7.150051594  | -0.293942004 | 3.896698236  |
| H  | 7.185622215  | 1.303808093  | 4.674232006  |
| H  | 8.069666862  | 1.156027555  | 1.937168002  |
| H  | 7.654343605  | 2.721151352  | 2.651084185  |
| H  | 6.985809326  | 2.258024693  | 1.080347776  |
| C  | 1.554693818  | -0.706192493 | 1.308315396  |
| H  | 1.203091979  | 0.178457811  | 1.847929478  |
| C  | 1.060936213  | -1.942996264 | 2.082729101  |
| C  | 0.910597503  | -0.675803363 | -0.091547221 |
| H  | 1.299246550  | 0.141772762  | -0.706078827 |
| H  | 1.083097935  | -1.608871341 | -0.638452411 |
| H  | -0.173508182 | -0.546981335 | -0.002447275 |
| H  | 1.440426111  | -2.863519430 | 1.624598265  |
| H  | -0.034125127 | -1.988479733 | 2.077136517  |
| H  | 1.392214179  | -1.921445251 | 3.122611523  |
| C  | 5.873979092  | -2.279332399 | -0.810712576 |
| H  | 5.118365288  | -2.920622110 | -1.284015059 |
| C  | 6.919051170  | -3.197921515 | -0.152578741 |
| C  | 6.512896538  | -1.416309953 | -1.915583968 |
| H  | 5.764251232  | -0.784057319 | -2.404275656 |
| H  | 7.285981178  | -0.759259284 | -1.501041889 |
| H  | 6.983144760  | -2.045655489 | -2.679512739 |
| H  | 7.719310760  | -2.615255594 | 0.317238778  |
| H  | 7.381035805  | -3.854806185 | -0.897877395 |
| H  | 6.463390350  | -3.823962450 | 0.621227145  |
| C  | 4.694520473  | 4.949637890  | 3.335631371  |
| C  | 4.742398739  | 4.170266628  | 4.501936436  |
| C  | 5.871359348  | 5.596940041  | 2.919545650  |
| C  | 5.928445816  | 4.050168514  | 5.233920574  |
| C  | 7.056401253  | 5.476072788  | 3.652806997  |
| C  | 7.092749596  | 4.693247795  | 4.808602333  |
| H  | 3.862599850  | 3.642511606  | 4.851809502  |
| H  | 5.876579285  | 6.221648216  | 2.029463768  |
| H  | 5.938561440  | 3.444524527  | 6.136980057  |
| H  | 7.951238632  | 5.991634846  | 3.312291861  |
| H  | 8.014975548  | 4.592267513  | 5.374278069  |
| Cl | 1.070099711  | 6.753600121  | 1.674315929  |
| O  | 0.632387817  | 2.253770351  | 6.292000771  |
| C  | -0.722199619 | 1.822795272  | 6.141208172  |
| H  | -1.168227434 | 2.223800659  | 5.220942020  |
| H  | -0.792734087 | 0.726990283  | 6.119770527  |
| H  | -1.270301342 | 2.205415249  | 7.005143166  |
| C  | 1.024447441  | 4.046183586  | 4.252375126  |
| H  | 0.532111764  | 4.387218475  | 3.346876860  |
| H  | 0.302839458  | 4.073136806  | 5.066380501  |
| H  | 1.790108204  | 4.796944141  | 4.487404823  |
| C  | 1.921569109  | -0.210447833 | 6.670197964  |
| H  | 2.885542393  | -0.500030518 | 7.101984024  |
| H  | 1.370024085  | 0.356305838  | 7.420000553  |
| H  | 1.376456618  | -1.140316010 | 6.464248657  |
| C  | 3.589927912  | -1.208762050 | 4.544053555  |
| H  | 4.256786823  | -1.207394123 | 5.413962841  |
| H  | 2.842386246  | -1.987230659 | 4.734396458  |

H 4.174713612 -1.512680769 3.678883076  
H 0.281441271 3.791866541 -1.274791956  
H -0.926412165 2.737122297 0.573468447  
H 4.881044388 1.730178833 -1.085716486  
H 5.471604347 4.069984436 -0.880892873

=====  
2C  
=====

C 3.836663485 0.267106354 2.060293436  
C 3.088580608 -0.612520397 1.241990566  
C 3.769225121 -1.445402741 0.346184582  
C 5.157199860 -1.416974783 0.218323469  
C 5.872551441 -0.515688777 1.013785124  
C 5.245710850 0.325053692 1.938059449  
C 3.110966206 0.968319237 3.173994303  
C 2.486386538 2.240717411 3.060181618  
C 1.652989745 2.689725161 4.127875805  
C 1.505342722 1.868078589 5.260252953  
C 2.185119152 0.659515023 5.418886662  
C 2.985227346 0.201964289 4.360754013  
H 3.202224016 -2.128699064 -0.280813456  
H 6.952427864 -0.468914688 0.910196722  
P 2.665606022 3.448963165 1.620264649  
C 1.198854685 3.047095537 0.502676070  
C 1.124488711 3.977199793 -0.719846606  
C -0.167274058 2.989417315 1.197583199  
H 1.448811054 2.035369873 0.165125936  
H 2.031627417 3.960562468 -1.325138211  
H 0.933989704 5.005563259 -0.406391591  
H -0.161486521 2.354163885 2.087775469  
H -0.502528191 3.993412733 1.470509768  
C 4.150587559 3.109885216 0.484226525  
C 4.644036770 4.424549103 -0.156502217  
C 3.992411137 2.061462402 -0.631326318  
H 4.917301655 2.779923201 1.180443525  
H 4.980915546 5.143306732 0.585950077  
H 3.872816563 4.904500484 -0.764222264  
H 3.524972439 1.137481451 -0.307832539  
H 3.421186686 2.461412430 -1.473150134  
Pd 2.959796429 5.608882904 2.449299097  
C 6.091511250 1.279304504 2.784811735  
H 5.445430279 2.098353624 3.115320921  
C 7.264817715 1.900679111 2.001863003  
C 6.633254051 0.608139217 4.061185360  
H 5.825360298 0.310552716 4.730347157  
H 7.222476482 -0.282924116 3.814214468  
H 7.277079105 1.307819247 4.604871273  
H 8.066034317 1.172896862 1.829895377  
H 7.685017109 2.731141806 2.575579643  
H 6.954774380 2.287489176 1.025892735  
C 1.560784698 -0.671556711 1.300281048  
H 1.211020470 0.236398518 1.799197674  
C 1.065734625 -1.870994210 2.130526781  
C 0.916483700 -0.702923417 -0.099285275  
H 1.323475957 0.072245076 -0.755514503  
H 1.068680763 -1.667600155 -0.595268667  
H -0.164556205 -0.546327710 -0.017995486

H 1.445601821 -2.811931133 1.715959191  
H -0.029415509 -1.916167617 2.125693083  
H 1.395621419 -1.800142765 3.168670177  
C 5.865084648 -2.313975334 -0.786475658  
H 5.098144531 -2.938325882 -1.264347911  
C 6.873402119 -3.256248951 -0.104821511  
C 6.544528008 -1.482694387 -1.891228557  
H 5.822383881 -0.831854045 -2.394911051  
H 7.332917213 -0.846269011 -1.473478198  
H 7.004086971 -2.134234667 -2.643194199  
H 7.681247234 -2.692018032 0.374452710  
H 7.329363823 -3.931545258 -0.837552786  
H 6.387609959 -3.863657236 0.665564477  
C 4.657884121 5.009060383 3.408405781  
C 4.636445522 4.254748821 4.593387127  
C 5.898263454 5.529208183 2.992746592  
C 5.806597710 4.019251823 5.323589802  
C 7.069309711 5.295168877 3.720383406  
C 7.029176235 4.533778667 4.889673233  
H 3.709081411 3.830120802 4.959842682  
H 5.965727806 6.132467747 2.089999676  
H 5.757596016 3.425184488 6.233380318  
H 8.012819290 5.707586288 3.369108200  
H 7.937662601 4.347743988 5.456664085  
Cl 0.903283894 6.667727470 1.537955761  
O 0.686007738 2.294672251 6.296710014  
C -0.649382770 1.794757009 6.205079556  
H -1.139605045 2.133381605 5.2820186985  
H -0.669030011 0.696925819 6.231266022  
H -1.191858530 2.187726736 7.068226814  
C 0.950742185 4.030797005 4.189523220  
H 0.470872551 4.333601475 3.263416290  
H 0.205053300 4.036339283 4.982040882  
H 1.673196435 4.820778847 4.430147171  
C 2.043609142 -0.133757338 6.695438385  
H 3.024082899 -0.407125056 7.099793911  
H 1.512336493 0.441819102 7.453386307  
H 1.500670433 -1.072539330 6.526591778  
C 3.653143167 -1.150460839 4.536963940  
H 4.334432602 -1.141204953 5.395388603  
H 2.911625624 -1.930485010 4.745142460  
H 4.224159718 -1.459203839 3.664853096  
H 0.298245043 3.650522709 -1.362599254  
H -0.898812234 2.570957422 0.495939821  
H 4.988077641 1.801890850 -1.007750750  
H 5.491996765 4.194013596 -0.813216031  
N 3.349426031 7.626719952 3.235938072  
H 2.878549814 8.275025368 2.607307196  
H 4.332827568 7.859791756 3.347676516  
H 2.900704861 7.680844784 4.146574497

=====  
2C'  
=====

C 3.877876043 0.279724747 2.117728710  
C 3.189530134 -0.689357102 1.349434853  
C 3.919265747 -1.504302025 0.475130975  
C 5.297734737 -1.370366693 0.317199886

|    |              |              |              |    |              |              |              |
|----|--------------|--------------|--------------|----|--------------|--------------|--------------|
| C  | 5.953949928  | -0.394751251 | 1.074288845  | C  | 4.557684898  | 5.138880253  | 3.048648119  |
| C  | 5.279285908  | 0.428475678  | 1.979297638  | C  | 4.584156990  | 4.485361099  | 4.291339397  |
| C  | 3.118252754  | 0.997030079  | 3.198514223  | C  | 5.760436058  | 5.698938847  | 2.581657887  |
| C  | 2.457980633  | 2.246102810  | 3.029675961  | C  | 5.761694908  | 4.405136108  | 5.041606426  |
| C  | 1.624225497  | 2.732846498  | 4.083051682  | C  | 6.939027786  | 5.622855663  | 3.330874920  |
| C  | 1.487735868  | 1.949930072  | 5.244477272  | C  | 6.944654465  | 4.972685337  | 4.566446304  |
| C  | 2.191831350  | 0.761774719  | 5.450950146  | H  | 3.685890675  | 4.035635471  | 4.697296143  |
| C  | 3.012209177  | 0.282547802  | 4.418667793  | H  | 5.792179585  | 6.219624043  | 1.626801014  |
| H  | 3.396646738  | -2.251404285 | -0.116795592 | H  | 5.748553276  | 3.895401478  | 6.002298355  |
| H  | 7.025375366  | -0.270790458 | 0.951511383  | H  | 7.852633476  | 6.069773197  | 2.944782257  |
| P  | 2.558629274  | 3.351616621  | 1.501515031  | H  | 7.858696938  | 4.910703182  | 5.151287079  |
| C  | 1.066875100  | 2.824635267  | 0.472103685  | Cl | 0.640341997  | 6.492429256  | 1.274059296  |
| C  | 0.914017797  | 3.665229082  | -0.806655705 | O  | 0.648021638  | 2.391594648  | 6.257788658  |
| C  | -0.270880938 | 2.765017033  | 1.220601916  | C  | -0.675954640 | 1.862173200  | 6.163745880  |
| H  | 1.342722178  | 1.801071525  | 0.195662126  | H  | -1.162784576 | 2.168233633  | 5.227735043  |
| H  | 1.805423737  | 3.653864622  | -1.435257435 | H  | -0.673555672 | 0.764923394  | 6.216150761  |
| H  | 0.679987431  | 4.701981068  | -0.556558490 | H  | -1.236237288 | 2.263934851  | 7.011328220  |
| H  | -0.209370732 | 2.193374634  | 2.150729418  | C  | 0.905799568  | 4.068014622  | 4.093528748  |
| H  | -0.635124803 | 3.772268534  | 1.438510060  | H  | 0.400131375  | 4.314932823  | 3.164442778  |
| C  | 4.014367104  | 3.000304222  | 0.329067230  | H  | 0.174390554  | 4.097686291  | 4.899272919  |
| C  | 4.423233032  | 4.289585114  | -0.414809853 | H  | 1.613568187  | 4.884225845  | 4.285975933  |
| C  | 3.862128258  | 1.878063440  | -0.710209906 | C  | 2.055772543  | 0.010972327  | 6.753759384  |
| H  | 4.820509911  | 2.747863531  | 1.013300538  | H  | 3.037923574  | -0.220235631 | 7.179972649  |
| H  | 4.736920357  | 5.076846123  | 0.265510589  | H  | 1.498572946  | 0.597507000  | 7.484097958  |
| H  | 3.613936424  | 4.683726311  | -1.035027981 | H  | 1.541362405  | -0.948173046 | 6.611482620  |
| H  | 3.467851639  | 0.954812467  | -0.301923335 | C  | 3.731740952  | -1.032223701 | 4.660546780  |
| H  | 3.225287199  | 2.189253330  | -1.542407632 | H  | 4.410943508  | -0.953412056 | 5.517338276  |
| Pd | 2.802208662  | 5.581205368  | 2.113390923  | H  | 3.022964954  | -1.831009507 | 4.907266617  |
| C  | 6.064033031  | 1.459488511  | 2.793002129  | H  | 4.316589355  | -1.358438015 | 3.803809404  |
| H  | 5.375478268  | 2.259081364  | 3.078151941  | H  | 0.089325316  | 3.255971670  | -1.402278185 |
| C  | 7.218672276  | 2.105950594  | 2.003795624  | H  | -1.010415912 | 2.273828506  | 0.576674163  |
| C  | 6.615845203  | 0.867076457  | 4.103906155  | H  | 4.850786209  | 1.649790168  | -1.123007655 |
| H  | 5.812165260  | 0.556869566  | 4.772857666  | H  | 5.267399788  | 4.055782795  | -1.075206280 |
| H  | 7.251801968  | -0.002962515 | 3.901947498  | N  | 3.216649055  | 7.720698833  | 2.607601404  |
| H  | 7.215919971  | 1.618640661  | 4.628381729  | H  | 4.137796402  | 7.976928711  | 2.263943672  |
| H  | 8.056064606  | 1.411529064  | 1.870068312  | H  | 2.489249706  | 8.167220116  | 2.048641682  |
| H  | 7.590237617  | 2.975582838  | 2.551746845  | C  | 3.073005438  | 7.971909046  | 4.012088776  |
| H  | 6.905504227  | 2.443185091  | 1.010513306  | C  | 1.787630558  | 8.068298340  | 4.555905342  |
| C  | 1.670959115  | -0.859103322 | 1.427754521  | C  | 4.198047638  | 8.023132324  | 4.837482452  |
| H  | 1.262329936  | 0.022611393  | 1.929778099  | C  | 1.637983203  | 8.237987518  | 5.930288792  |
| C  | 1.275300026  | -2.091241598 | 2.263366461  | C  | 4.033916473  | 8.189105988  | 6.212812901  |
| C  | 1.014399290  | -0.945120335 | 0.035348054  | C  | 2.757340908  | 8.301867485  | 6.764380455  |
| H  | 1.346339226  | -0.140131041 | -0.626821041 | H  | 0.926516891  | 7.980680466  | 3.898771763  |
| H  | 1.240879536  | -1.894321918 | -0.462165534 | H  | 5.189529419  | 7.896642208  | 4.411552906  |
| H  | -0.074976861 | -0.879168034 | 0.129255459  | H  | 0.639470577  | 8.313988686  | 6.351900101  |
| H  | 1.717221498  | -3.001691818 | 1.842271566  | H  | 4.910945892  | 8.223409653  | 6.853161812  |
| H  | 0.186425850  | -2.216444731 | 2.272366762  | H  | 2.634105921  | 8.429118156  | 7.836067677  |
| H  | 1.613191724  | -1.998954058 | 3.297039747  |    |              |              |              |
| C  | 6.058620453  | -2.223527431 | -0.686659157 |    |              |              |              |
| H  | 5.342894077  | -2.931983232 | -1.124907851 |    |              |              |              |
| C  | 7.177660942  | -3.043067932 | -0.019851342 |    |              |              |              |
| C  | 6.616928577  | -1.355386376 | -1.831178904 |    |              |              |              |
| H  | 5.817851543  | -0.792392015 | -2.324655771 |    |              |              |              |
| H  | 7.348743439  | -0.632778227 | -1.452179670 |    |              |              |              |
| H  | 7.117325783  | -1.974979520 | -2.584042549 |    |              |              |              |
| H  | 7.940618038  | -2.389787912 | 0.418073207  |    |              |              |              |
| H  | 7.674960613  | -3.687557936 | -0.753370464 |    |              |              |              |
| H  | 6.780860901  | -3.676120281 | 0.780172706  |    |              |              |              |

  

|       |             |              |              |   |             |              |              |
|-------|-------------|--------------|--------------|---|-------------|--------------|--------------|
| ===== |             |              |              |   |             |              |              |
| 2D    |             |              |              |   |             |              |              |
| ===== |             |              |              |   |             |              |              |
| C     | 2.268916368 | -6.429844379 | -3.480628729 | C | 2.268916368 | -6.429844379 | -3.480628729 |
| C     | 1.514189720 | -6.142575264 | -2.315156937 | C | 1.514189720 | -6.142575264 | -2.315156937 |
| C     | 0.883396745 | -7.191119194 | -1.635493159 | C | 0.883396745 | -7.191119194 | -1.635493159 |
| C     | 0.959942400 | -8.510516167 | -2.077688456 | C | 0.959942400 | -8.510516167 | -2.077688456 |
| C     | 1.702190876 | -8.770492554 | -3.232784986 | C | 1.702190876 | -8.770492554 | -3.232784986 |
| C     | 2.363893986 | -7.765224934 | -3.945236921 | C | 2.363893986 | -7.765224934 | -3.945236921 |
| C     | 3.080784559 | -5.304617882 | -4.065858364 | C | 3.080784559 | -5.304617882 | -4.065858364 |

|    |              |               |               |   |              |               |               |
|----|--------------|---------------|---------------|---|--------------|---------------|---------------|
| C  | 2.567516804  | -4.341399670  | -4.983277321  | H | 0.593171060  | -11.513323784 | -0.338663518  |
| C  | 3.322476625  | -3.161009789  | -5.223847389  | H | 1.952434897  | -10.373991966 | -0.267445832  |
| C  | 4.584593296  | -3.030243397  | -4.620275021  | C | 1.366325140  | -4.721010685  | -1.770224214  |
| C  | 5.154221058  | -4.021093845  | -3.824615479  | H | 1.643678784  | -4.024933338  | -2.565215826  |
| C  | 4.372391224  | -5.146816730  | -3.508996010  | C | 2.321687460  | -4.472815990  | -0.586791456  |
| H  | 0.303996623  | -6.973483562  | -0.741932511  | C | -0.080710754 | -4.390318394  | -1.359850645  |
| H  | 1.760644674  | -9.792355537  | -3.594031811  | H | -0.795884609 | -4.653783798  | -2.145173073  |
| P  | 1.014416575  | -4.519925594  | -6.033604622  | H | -0.379614502 | -4.921066761  | -0.449391931  |
| C  | -0.305562496 | -3.540664196  | -5.101319313  | H | -0.177612633 | -3.318192720  | -1.157364249  |
| C  | -1.650748372 | -3.512603521  | -5.846058369  | H | 2.124330759  | -5.183062077  | 0.224633664   |
| C  | 0.092896000  | -2.119859695  | -4.682455063  | H | 2.190363646  | -3.459401608  | -0.190025061  |
| H  | -0.417672753 | -4.137145042  | -4.188276768  | H | 3.365424395  | -4.585463524  | -0.888092518  |
| H  | -2.042789459 | -4.508743763  | -6.055558205  | C | 1.935406923  | -1.960626245  | -16.357818604 |
| H  | -1.558538795 | -2.973092794  | -6.790331364  | O | 1.598499179  | -1.952897310  | -15.001611710 |
| H  | 1.041626692  | -2.093776226  | -4.140122890  | C | 3.605218410  | -0.591215551  | -11.286115646 |
| H  | 0.160126567  | -1.459186792  | -5.550189495  | O | 2.579265356  | -1.387882590  | -11.823811531 |
| C  | 0.284646422  | -6.267458439  | -6.066239357  | C | -0.182666406 | -5.093719006  | -12.416635513 |
| C  | -0.440994143 | -6.514701366  | -7.405541897  | O | 0.528023839  | -3.880855560  | -12.455273628 |
| C  | -0.643893301 | -6.698996067  | -4.919633389  | C | -1.668228507 | 0.211484626   | -12.641423225 |
| H  | 1.175597787  | -6.890160084  | -6.062757492  | O | -0.596185505 | -0.660169065  | -12.864588737 |
| H  | 0.187748730  | -6.298234940  | -8.266903877  | C | 3.099351883  | -0.978737295  | -16.618690491 |
| H  | -1.345296264 | -5.907955647  | -7.500953197  | C | 0.717342019  | -1.532579899  | -17.207763672 |
| H  | -0.246975854 | -6.485768795  | -3.932133436  | C | 2.369957447  | -3.380632162  | -16.786991119 |
| H  | -1.627878070 | -6.230161667  | -5.005669594  | C | 3.738868952  | 0.725344956   | -12.091004372 |
| Pd | 1.653661847  | -4.035131454  | -8.249776840  | C | 4.952105045  | -1.344946146  | -11.364439011 |
| Cl | 0.082509853  | -2.085047245  | -8.573209763  | C | 3.296006918  | -0.239735186  | -9.814712524  |
| C  | 3.015476704  | -5.535686016  | -8.148400307  | C | 0.798365593  | -6.285871506  | -12.495862007 |
| C  | 2.798057079  | -6.732347012  | -8.854029655  | C | -1.006181598 | -5.185161114  | -11.115054131 |
| C  | 4.280875683  | -5.334414005  | -7.572181225  | C | -1.150228977 | -5.183032036  | -13.621626854 |
| C  | 3.803752184  | -7.699057102  | -8.967122078  | C | -2.158510923 | 0.790471673   | -13.986490250 |
| C  | 5.282353401  | -6.306754112  | -7.674900532  | C | -2.832320452 | -0.545911193  | -11.961784363 |
| C  | 5.049166203  | -7.496439934  | -8.368717194  | C | -1.223089457 | 1.373769045   | -11.724343300 |
| H  | 1.843848705  | -6.921195507  | -9.337231636  | H | 3.950595140  | -1.238535285  | -15.977959633 |
| H  | 4.497005463  | -4.421074390  | -7.030308247  | H | 3.436596155  | -0.985740185  | -17.662305832 |
| H  | 3.605870008  | -8.614603043  | -9.520755768  | H | 2.790450811  | 0.045962412   | -16.372606277 |
| H  | 6.247858047  | -6.129749775  | -7.206194878  | H | 0.947905540  | -1.464785814  | -18.277786255 |
| H  | 5.828390598  | -8.249612808  | -8.450078964  | H | -0.100549251 | -2.256632328  | -17.089021683 |
| N  | 2.394053221  | -3.823300600  | -10.265884399 | H | 0.355658054  | -0.555119991  | -16.868000031 |
| H  | 2.645676613  | -2.862212896  | -10.545344353 | H | 3.270800352  | -3.682807207  | -16.235363007 |
| H  | 3.207462311  | -4.423082829  | -10.382069588 | H | 1.573003173  | -4.097072601  | -16.553508759 |
| C  | 3.152059793  | -8.151263237  | -5.200983524  | H | 2.595029593  | -3.452159166  | -17.857971191 |
| H  | 3.276918411  | -7.257218838  | -5.818703175  | H | 2.809597492  | 1.309293151   | -12.018728256 |
| C  | 2.422980070  | -9.212977409  | -6.050232887  | H | 4.546691895  | 1.367009759   | -11.720848083 |
| C  | 4.566784382  | -8.664196014  | -4.869232655  | H | 3.954534054  | 0.504953623   | -13.146530151 |
| H  | 5.187255383  | -7.881017685  | -4.433840752  | H | 5.788320541  | -0.761137903  | -10.961997986 |
| H  | 4.521942139  | -9.501851082  | -4.162965775  | H | 4.895500183  | -2.281591177  | -10.797415733 |
| H  | 5.061357975  | -9.008279800  | -5.783497334  | H | 5.181167126  | -1.590666890  | -12.409858704 |
| H  | 2.444487095  | -10.197737694 | -5.570399284  | H | 3.197117090  | -1.148416758  | -9.212008476  |
| H  | 2.916498899  | -9.306413651  | -7.020012856  | H | 4.076367855  | 0.387027830   | -9.365429878  |
| H  | 1.374296069  | -8.954479218  | -6.228507042  | H | 2.341006517  | 0.293109059   | -9.748588562  |
| C  | 0.211676463  | -9.622013092  | -1.356986046  | H | -2.493883133 | -0.021197341  | -14.644783974 |
| H  | -0.238850385 | -9.183287621  | -0.456423283  | H | -2.988732815 | 1.497290611   | -13.867248535 |
| C  | 1.147996545  | -10.756135941 | -0.903996885  | H | -1.334990144 | 1.310757279   | -14.491618156 |
| C  | -0.932828128 | -10.166273117 | -2.234402180  | H | -2.510125160 | -0.950780332  | -10.994531631 |
| H  | -1.615688920 | -9.364191055  | -2.533318520  | H | -3.706402063 | 0.093577556   | -11.787257195 |
| H  | -0.538703084 | -10.626271248 | -3.147957802  | H | -3.146975040 | -1.388053417  | -12.591639519 |
| H  | -1.509783387 | -10.927655220 | -1.697127461  | H | -0.857311189 | 0.981691360   | -10.767933846 |
| H  | 1.610068917  | -11.257080078 | -1.762062550  | H | -0.403050572 | 1.932062030   | -12.195827484 |

|    |              |              |               |    |              |               |               |
|----|--------------|--------------|---------------|----|--------------|---------------|---------------|
| H  | -2.035092115 | 2.081126928  | -11.516002655 | H  | -0.388659507 | -4.150819778  | -4.086338997  |
| H  | 0.285130560  | -7.255146980 | -12.477710724 | H  | -2.083080053 | -4.485493183  | -5.887599945  |
| H  | 1.380514979  | -6.228183746 | -13.424954414 | H  | -1.604407787 | -2.954120874  | -6.638821125  |
| H  | 1.498416662  | -6.262760162 | -11.653302193 | H  | 1.078613281  | -2.107569933  | -4.054015160  |
| H  | -1.721569180 | -4.355922699 | -11.064958572 | H  | 0.144828573  | -1.448747516  | -5.419469833  |
| H  | -1.563933372 | -6.126854420 | -11.038942337 | C  | 0.234144613  | -6.245078087  | -6.035934448  |
| H  | -0.351510316 | -5.101024151 | -10.242483139 | C  | -0.584043860 | -6.422747135  | -7.333395958  |
| H  | -1.909451842 | -4.388781071 | -13.562765121 | C  | -0.624201894 | -6.711336613  | -4.850416660  |
| H  | -0.591547430 | -5.088215828 | -14.563189507 | H  | 1.117247701  | -6.875600338  | -6.114750862  |
| H  | -1.694795489 | -6.133507252 | -13.655930519 | H  | -0.043003675 | -6.101177692  | -8.221682549  |
| Na | -0.383073837 | -2.491809368 | -14.077689171 | H  | -1.521196008 | -5.860678196  | -7.303296089  |
| Na | 2.463251114  | -3.090106487 | -13.304141998 | H  | -0.155507758 | -6.553135395  | -3.884586334  |
| Na | 0.346894860  | -1.866357684 | -11.184643745 | H  | -1.599310517 | -6.216681480  | -4.846558094  |
| Na | 1.485770583  | -0.257957876 | -13.523431778 | Pd | 1.546591401  | -3.958158970  | -8.190853119  |
| H  | 1.676428914  | -4.090986729 | -10.964137077 | Cl | -0.029343151 | -1.932553053  | -8.429118156  |
| C  | 2.940949917  | -2.003323078 | -6.126389503  | C  | 2.851533413  | -5.513854027  | -8.159386635  |
| H  | 3.694300413  | -1.876051188 | -6.909869194  | C  | 2.552929163  | -6.702177048  | -8.845422745  |
| H  | 1.977445364  | -2.107966185 | -6.611251831  | C  | 4.149408340  | -5.352316380  | -7.651005745  |
| H  | 2.920536041  | -1.066977143 | -5.559841156  | C  | 3.528076410  | -7.687374592  | -9.034761429  |
| O  | 5.316966057  | -1.886505604 | -4.902706623  | C  | 5.118309021  | -6.345289707  | -7.826415062  |
| C  | 5.222850323  | -0.875787914 | -3.898643970  | C  | 4.814867973  | -7.518108368  | -8.520597458  |
| H  | 4.181504726  | -0.568213761 | -3.734081030  | H  | 1.566099763  | -6.867144585  | -9.264572144  |
| H  | 5.641127110  | -1.217504740 | -2.942304134  | H  | 4.422924519  | -4.447120667  | -7.120972633  |
| H  | 5.798651218  | -0.020232685 | -4.259336472  | H  | 3.274845123  | -8.590205193  | -9.586421013  |
| C  | 6.559138298  | -3.864558697 | -3.296705961  | H  | 6.116421700  | -6.193768501  | -7.421725750  |
| H  | 6.568164825  | -3.708806753 | -2.210633755  | H  | 5.571752548  | -8.284217834  | -8.666204453  |
| H  | 7.152955055  | -4.764788151 | -3.488808155  | N  | 2.290808678  | -3.485789537  | -10.242238045 |
| H  | 7.060090065  | -3.020568132 | -3.772099495  | H  | 2.279926062  | -2.454483509  | -10.280713081 |
| C  | 4.957832336  | -6.128427505 | -2.512158632  | C  | 3.158199072  | -8.108241081  | -5.240128517  |
| H  | 5.208610535  | -5.622227669 | -1.572690368  | H  | 3.195265532  | -7.217506409  | -5.874295235  |
| H  | 4.283816814  | -6.949482441 | -2.279711246  | C  | 2.463017702  | -9.228906631  | -6.038651466  |
| H  | 5.894021988  | -6.557214737 | -2.886096001  | C  | 4.619916916  | -8.513466835  | -4.970133305  |
| H  | -2.390661955 | -2.996258497 | -5.222697735  | H  | 5.202257633  | -7.677623749  | -4.581562042  |
| H  | -0.681318402 | -1.721386433 | -4.015793324  | H  | 4.670293331  | -9.336676598  | -4.247793674  |
| H  | -0.794092834 | -7.782710552 | -4.979455471  | H  | 5.092345238  | -8.839385033  | -5.902395248  |
| H  | -0.739624023 | -7.569168091 | -7.454557896  | H  | 2.574972391  | -10.202617645 | -5.548809528  |

=====  
2D'  
=====

|   |              |              |              |   |              |               |              |
|---|--------------|--------------|--------------|---|--------------|---------------|--------------|
| C | 2.315743208  | -6.427044392 | -3.467328072 | H | 1.391677022  | -9.043127060  | -6.167149544 |
| C | 1.599471092  | -6.160306454 | -2.275002480 | C | 0.366691560  | -9.666172028  | -1.317170978 |
| C | 1.002415895  | -7.223359108 | -1.586502910 | H | -0.066132426 | -9.243089676  | -0.400633961 |
| C | 1.075712681  | -8.536054611 | -2.048798800 | C | 1.336228490  | -10.786615372 | -0.900811732 |
| C | 1.779468417  | -8.774191856 | -3.232596636 | C | -0.791976571 | -10.224682808 | -2.166602850 |
| C | 2.407225609  | -7.753829002 | -3.953876734 | H | -1.496938229 | -9.433012962  | -2.440928221 |
| C | 3.102212429  | -5.290246964 | -4.061770916 | H | -0.415747434 | -10.672016144 | -3.093829632 |
| C | 2.568046570  | -4.334951401 | -4.974758148 | H | -1.340280771 | -10.999784470 | -1.619082093 |
| C | 3.315277815  | -3.150871515 | -5.231019497 | H | 1.784301043  | -11.269932747 | -1.776255846 |
| C | 4.585253716  | -3.010969639 | -4.646159649 | H | 0.811596930  | -11.559879303 | -0.328455448 |
| C | 5.169372559  | -3.990867615 | -3.847183466 | H | 2.150441885  | -10.395283699 | -0.282516807 |
| C | 4.399583817  | -5.120650291 | -3.519262314 | C | 1.455071330  | -4.743602276  | -1.715618372 |
| H | 0.452286422  | -7.022554398 | -0.670899391 | H | 1.710934639  | -4.040292263  | -2.512152195 |
| H | 1.833016753  | -9.790452957 | -3.608913660 | C | 2.434709787  | -4.496191025  | -0.552230477 |
| P | 0.980875790  | -4.506354809 | -5.978618622 | C | 0.015416399  | -4.424356937  | -1.268613338 |
| C | -0.305237144 | -3.537415743 | -4.991585732 | H | -0.717492342 | -4.689270020  | -2.036791801 |
| C | -1.672691822 | -3.493702173 | -5.692685127 | H | -0.257030904 | -4.961701870  | -0.353840500 |
| C | 0.110609241  | -2.124552488 | -4.561478615 | H | -0.084261097 | -3.353988171  | -1.058024287 |
|   |              |              |              | H | 2.261871815  | -5.214454651  | 0.257540882  |
|   |              |              |              | H | 2.303711414  | -3.487221003  | -0.144118294 |
|   |              |              |              | H | 3.472484827  | -4.597397804  | -0.877138793 |

C 1.974232078 -1.446179152 -16.082164764  
O 1.408680439 -1.524089694 -14.806190491  
C 2.943706512 0.150468603 -11.047595024  
O 2.121903419 -0.861674249 -11.574917793  
C -0.561456442 -4.659756184 -12.207279205  
O 0.329334795 -3.571702719 -12.302043915  
C -2.206682444 0.303853571 -12.619108200  
O -1.039347529 -0.450730503 -12.776771545  
C 3.073339224 -0.359273136 -16.109470367  
C 0.887175322 -1.088303208 -17.119522095  
C 2.604814291 -2.804842234 -16.463451385  
C 2.391355991 1.554625630 -11.417271614  
C 4.370432377 0.023648102 -11.625166893  
C 2.995631456 0.065018892 -9.505618095  
C 0.215481102 -5.991470337 -12.156857491  
C -1.433340430 -4.537553310 -10.938217163  
C -1.502525091 -4.706428528 -13.439229965  
C -2.619589090 0.918689907 -13.974719048  
C -3.350276232 -0.599290371 -12.104017258  
C -1.967651725 1.441720843 -11.601104736  
H 3.826359749 -0.571132183 -15.340562820  
H 3.580915213 -0.292708218 -17.079481125  
H 2.637477398 0.625734091 -15.893291473  
H 1.289422512 -0.968017936 -18.132822037  
H 0.123901546 -1.876931667 -17.150669098  
H 0.394285232 -0.152819768 -16.829025269  
H 3.426520348 -3.049169540 -15.776137352  
H 1.849112391 -3.595267057 -16.384466171  
H 3.010646343 -2.813854218 -17.482339859  
H 1.339640141 1.641282558 -11.117262840  
H 2.947037697 2.361685276 -10.926654816  
H 2.480218887 1.748004198 -12.499017715  
H 5.049490929 0.798120081 -11.246606827  
H 4.789513111 -0.955187857 -11.371559143  
H 4.338818073 0.103335850 -12.719967842  
H 3.403364182 -0.899508715 -9.188725471  
H 3.625944853 0.849839807 -9.069642067  
H 1.989270210 0.141218871 -9.082890511  
H -2.793885231 0.123059295 -14.710226059  
H -3.530397654 1.526183128 -13.906291008  
H -1.812171578 1.555873036 -14.357533455  
H -3.077450037 -1.041016459 -11.137708664  
H -4.293743134 -0.054806810 -11.974481583  
H -3.524922371 -1.420568585 -12.810977936  
H -1.664537311 1.026063681 -10.632473946  
H -1.159851193 2.096312284 -11.952544212  
H -2.859691143 2.059761763 -11.442351341  
H -0.451510161 -6.860893250 -12.116047859  
H 0.848891735 -6.088158607 -13.046822548  
H 0.857016742 -6.023348808 -11.270511627  
H -2.031160116 -3.618211985 -10.971974373  
H -2.124835968 -5.382460594 -10.829176903  
H -0.805200279 -4.489813328 -10.043192863  
H -2.171640635 -3.833163500 -13.455529213  
H -0.913435698 -4.744090557 -14.366423607  
H -2.153702736 -5.587359905 -13.429578781  
Na -0.550644934 -2.217357635 -14.004956245  
Na 2.284684896 -2.583130836 -13.051590919

Na -0.020328453 -1.557125092 -11.057633400  
Na 1.015444756 0.145202532 -13.351329803  
H 1.543392897 -3.758302450 -10.917074203  
C 2.915687561 -1.994308472 -6.127230167  
H 3.620799541 -1.903536797 -6.960124493  
H 1.919903755 -2.066013575 -6.549194336  
H 2.966576099 -1.049859881 -5.577599525  
O 5.309016228 -1.866038322 -4.946864128  
C 5.236089230 -0.851962626 -3.943657398  
H 4.198575974 -0.542201817 -3.759836674  
H 5.672252655 -1.190740347 -2.994534969  
H 5.806008339 0.001507899 -4.318267822  
C 6.577100754 -3.818307877 -3.330495596  
H 6.592233181 -3.636479616 -2.247984409  
H 7.173379898 -4.720185280 -3.505072832  
H 7.072786808 -2.983647585 -3.827573538  
C 5.004076481 -6.099313259 -2.529930115  
H 5.262664318 -5.595464230 -1.591021180  
H 4.338998318 -6.926195145 -2.292638063  
H 5.938088894 -6.521272182 -2.916890860  
H -2.385541916 -2.968348980 -5.045922279  
H -0.638542950 -1.738430381 -3.859950542  
H -0.805693924 -7.787144661 -4.951187134  
H -0.835393131 -7.484288692 -7.446815491  
C 3.578978300 -3.927441835 -10.682962418  
C 4.730403900 -3.353381872 -10.126927376  
C 3.716009617 -4.913274288 -11.668561935  
C 5.992799282 -3.735037088 -10.569848061  
C 4.988277912 -5.297293663 -12.104923248  
C 6.130630970 -4.708263874 -11.564609528  
H 4.624298573 -2.619877100 -9.335294724  
H 2.832934380 -5.390299320 -12.076553345  
H 6.873693943 -3.279055119 -10.126293182  
H 5.079375267 -6.071100235 -12.862859726  
H 7.117114544 -5.011899471 -11.902670860

=====  
2E  
=====

C -2.410822392 -4.605316639 -4.555454254  
C -3.064215899 -3.893791199 -3.514012814  
C -4.448340893 -4.016364574 -3.368171453  
C -5.219195843 -4.792012691 -4.237839222  
C -4.557245731 -5.492374420 -5.243850708  
C -3.167120218 -5.442458630 -5.409698009  
C -0.903405190 -4.566004753 -4.598119736  
C -0.152274013 -3.517023563 -5.209436417  
C 1.254689574 -3.492868900 -5.002824306  
C 1.860358834 -4.523970127 -4.263561249  
C 1.146504045 -5.588032722 -3.710267544  
C -0.251403868 -5.590713501 -3.864734411  
H -4.944341183 -3.472448111 -2.570319653  
H -5.144972324 -6.115365028 -5.913830757  
P -0.803570688 -2.150842428 -6.358900070  
C -1.094489932 -0.688941479 -5.196182251  
C -1.488480091 0.579961896 -5.972737789  
C 0.063653439 -0.366456658 -4.241144180  
H -1.947540283 -1.006763935 -4.590568066

|    |              |              |               |    |              |               |               |
|----|--------------|--------------|---------------|----|--------------|---------------|---------------|
| H  | -2.245002508 | 0.400431573  | -6.739193916  | O  | 1.903441668  | -6.529845715  | -11.011425018 |
| H  | -0.620647311 | 1.017170429  | -6.467019558  | C  | 4.985895157  | -4.690326691  | -8.319517136  |
| H  | 0.392579436  | -1.236162782 | -3.665707350  | O  | 3.709851980  | -5.242278099  | -8.486310005  |
| H  | 0.922285438  | 0.037425119  | -4.784998894  | C  | 1.510147095  | -9.013667107  | -7.267341614  |
| C  | -2.542254925 | -2.548721075 | -7.007578373  | O  | 1.663095951  | -7.800094604  | -7.942647934  |
| C  | -2.667576551 | -2.129898548 | -8.486421585  | C  | 0.542819440  | -6.427199364  | -13.003062248 |
| C  | -3.747334957 | -2.006194830 | -6.225904942  | C  | 2.144451141  | -8.326803207  | -12.606502533 |
| H  | -2.568216801 | -3.633960485 | -6.970689774  | C  | 3.022478819  | -6.020746708  | -13.089406013 |
| H  | -1.920013785 | -2.617297411 | -9.115450859  | C  | 5.501492500  | -4.976767540  | -6.891768456  |
| H  | -2.563930511 | -1.047087193 | -8.611111641  | C  | 5.969809532  | -5.313613892  | -9.339661598  |
| H  | -3.713663578 | -2.242331982 | -5.166280270  | C  | 4.948189735  | -3.161806107  | -8.547947884  |
| H  | -3.848686218 | -0.923022091 | -6.338420868  | C  | 2.873487473  | -9.730813980  | -7.138427258  |
| Pd | 0.588939726  | -2.082056522 | -8.332880974  | C  | 0.951641560  | -8.752287865  | -5.852732182  |
| Cl | 0.005283552  | -4.648580074 | -8.440243721  | C  | 0.533255637  | -9.934918404  | -8.034883499  |
| C  | 0.886157215  | -0.107239060 | -8.349981308  | H  | 0.331549406  | -5.371546268  | -12.798739433 |
| C  | 1.935294986  | 0.507173717  | -7.648170948  | H  | 0.511673510  | -6.584953308  | -14.088110924 |
| C  | 0.022373766  | 0.710614443  | -9.099114418  | H  | -0.264193177 | -7.025083065  | -12.556476593 |
| C  | 2.089010954  | 1.898916483  | -7.656694889  | H  | 2.116364956  | -8.608447075  | -13.666142464 |
| C  | 0.178676069  | 2.099802732  | -9.109675407  | H  | 3.125809669  | -8.617009163  | -12.207569122 |
| C  | 1.206824541  | 2.703394175  | -8.379788399  | H  | 1.381033897  | -8.910411835  | -12.076327324 |
| H  | 2.650553942  | -0.092734911 | -7.092238903  | H  | 2.842198849  | -4.942588329  | -12.989932060 |
| H  | -0.790295124 | 0.265755236  | -9.667179108  | H  | 3.989579916  | -6.246625900  | -12.623679161 |
| H  | 2.906464100  | 2.351362467  | -7.098915577  | H  | 3.093523979  | -6.250921726  | -14.159431458 |
| H  | -0.508845448 | 2.713174820  | -9.688426018  | H  | 3.590542316  | -9.067717552  | -6.639162064  |
| H  | 1.325169444  | 3.783605099  | -8.385474205  | H  | 2.810873032  | -10.664097786 | -6.565478802  |
| N  | 1.730906963  | -2.156906605 | -10.079165459 | H  | 3.267733812  | -9.977734566  | -8.133836746  |
| H  | 2.481625319  | -1.471625686 | -9.973330498  | H  | 0.027607290  | -8.170972824  | -5.925995350  |
| C  | -2.536577702 | -6.351294518 | -6.470050335  | H  | 0.743309915  | -9.673275948  | -5.293745518  |
| H  | -1.461239696 | -6.153442860 | -6.498845100  | H  | 1.677366495  | -8.165471077  | -5.279275417  |
| C  | -3.088269711 | -6.102965832 | -7.888764381  | H  | -0.458080828 | -9.464613914  | -8.095293045  |
| C  | -2.755820036 | -7.836472034 | -6.109277725  | H  | 0.901797235  | -10.099381447 | -9.055542946  |
| H  | -2.399079323 | -8.077314377 | -5.106543541  | H  | 0.404522449  | -10.913738251 | -7.557243824  |
| H  | -3.819636583 | -8.095242500 | -6.154434204  | H  | 6.517436504  | -4.596742630  | -6.725470543  |
| H  | -2.226620913 | -8.483732224 | -6.817540646  | H  | 4.838420868  | -4.522109985  | -6.147262096  |
| H  | -4.175000668 | -6.236565113 | -7.927811146  | H  | 5.507980824  | -6.060640335  | -6.717457294  |
| H  | -2.651055336 | -6.827605724 | -8.587600708  | H  | 5.596369267  | -5.162413120  | -10.360501289 |
| H  | -2.843413115 | -5.108544350 | -8.262326241  | H  | 6.976439953  | -4.882124424  | -9.278592110  |
| C  | -2.289292097 | -3.018505812 | -2.525941372  | H  | 6.064173698  | -6.395259380  | -9.163367271  |
| H  | -1.352427483 | -2.722947359 | -3.004821062  | H  | 4.658580303  | -2.933780193  | -9.581130981  |
| C  | -1.923372507 | -3.807284594 | -1.252620935  | H  | 4.200317383  | -2.703516006  | -7.893636703  |
| C  | -3.033039808 | -1.727021813 | -2.138923407  | H  | 5.918597698  | -2.687126160  | -8.357380867  |
| H  | -3.416418791 | -1.193963766 | -3.014174461  | Na | 3.294051409  | -7.224205017  | -9.400321007  |
| H  | -3.881573200 | -1.927887201 | -1.475884080  | Na | 2.306711674  | -4.410710812  | -10.139752388 |
| H  | -2.355879068 | -1.054402471 | -1.601714492  | Na | 2.096646309  | -5.753142357  | -7.040586948  |
| H  | -2.827702284 | -4.185400009 | -0.761916041  | Na | 0.314825296  | -7.020668983  | -9.542009354  |
| H  | -1.393538833 | -3.164554358 | -0.539941370  | C  | 2.209814548  | -2.434367895  | -5.511780739  |
| H  | -1.280813098 | -4.659704685 | -1.480978131  | H  | 2.743138075  | -1.964851379  | -4.679301739  |
| C  | -6.733815670 | -4.849427700 | -4.110433578  | H  | 2.966220140  | -2.877445936  | -6.164769650  |
| H  | -7.099924088 | -5.554885387 | -4.868425369  | H  | 1.710275650  | -1.655118585  | -6.073436737  |
| C  | -7.361434460 | -3.474222183 | -4.409217358  | O  | 3.244863749  | -4.505632877  | -4.153233051  |
| C  | -7.178714752 | -5.372770309 | -2.733339548  | C  | 3.751249790  | -3.953675508  | -2.935407877  |
| H  | -6.748510361 | -6.358037472 | -2.527245045  | H  | 3.377809048  | -2.934615612  | -2.773687840  |
| H  | -6.864237309 | -4.696027279 | -1.930882454  | H  | 3.477589369  | -4.571700096  | -2.071174145  |
| H  | -8.270079613 | -5.457717896 | -2.685743570  | H  | 4.838382721  | -3.930394888  | -3.034898520  |
| H  | -7.035549641 | -2.728361368 | -3.675272465  | C  | 1.863037944  | -6.658747196  | -2.922782660  |
| H  | -8.455336571 | -3.527219772 | -4.371024132  | H  | 1.762852311  | -6.484998226  | -1.843238473  |
| H  | -7.068738937 | -3.113888979 | -5.400881767  | H  | 1.454448462  | -7.651464462  | -3.122650385  |
| C  | 1.902928829  | -6.816549301 | -12.380460739 | H  | 2.927000523  | -6.671535492  | -3.165853739  |

C -1.010562539 -6.713758945 -3.185695171  
H -2.087779045 -6.567758083 -3.211840391  
H -0.785175264 -7.674255371 -3.663013697  
H -0.711061597 -6.810290813 -2.136146784  
H -3.662476778 -2.413933992 -8.852357864  
H -4.659914494 -2.463242531 -6.625406742  
H -1.894304156 1.320253372 -5.272267342  
H -0.265138954 0.399973691 -3.528820038  
H 1.131994247 -1.735168576 -10.793798447

=====  
2E'  
=====

C -2.542431116 -4.542820930 -4.629445553  
C -2.991093874 -3.837970972 -3.483422041  
C -4.363010883 -3.748620749 -3.233704329  
C -5.310243607 -4.301761627 -4.099412918  
C -4.846874714 -5.004532814 -5.210669518  
C -3.483273268 -5.165119648 -5.485250473  
C -1.062215328 -4.740670204 -4.821825981  
C -0.204411358 -3.779025078 -5.429782867  
C 1.191975594 -4.040329933 -5.447403431  
C 1.660099745 -5.275869370 -4.975398064  
C 0.831261933 -6.243017673 -4.405144691  
C -0.537135363 -5.946480274 -4.293210030  
H -4.705694675 -3.206891060 -2.357572317  
H -5.575289726 -5.455086231 -5.880996227  
P -0.718109190 -2.221960306 -6.385342121  
C -0.674004436 -0.840246260 -5.098160267  
C -0.932106853 0.538673818 -5.731476784  
C 0.592370510 -0.785203159 -4.231948853  
H -1.513998151 -1.085584283 -4.442105293  
H -1.760305285 0.538833499 -6.442221642  
H -0.048533600 0.895772755 -6.260892868  
H 0.844109535 -1.752503037 -3.787386894  
H 1.450835824 -0.432495683 -4.811310291  
C -2.544741154 -2.291097403 -6.898766041  
C -2.730167150 -1.744914889 -8.328365326  
C -3.578258276 -1.633803844 -5.972643375  
H -2.740890503 -3.358990669 -6.927143574  
H -2.128391743 -2.281751871 -9.064298630  
H -2.470298767 -0.683812857 -8.395865440  
H -3.490444899 -1.948853731 -4.936894894  
H -3.521311045 -0.542392850 -6.011826992  
Pd 0.431035787 -2.214448929 -8.479010582  
Cl -0.308042258 -4.720036030 -8.600014687  
C 0.962905884 -0.288852960 -8.413533211  
C 2.096326351 0.154744908 -7.715512753  
C 0.188873932 0.654975116 -9.106610298  
C 2.425360441 1.515741944 -7.676856041  
C 0.514674842 2.013913870 -9.059745789  
C 1.627797246 2.453085899 -8.336649895  
H 2.739417553 -0.553831756 -7.200687885  
H -0.664113104 0.332039446 -9.696980476  
H 3.307479143 1.839580894 -7.128099442  
H -0.101957999 2.731748819 -9.596543312  
H 1.878591776 3.509907246 -8.301319122  
N 1.264782667 -2.226836443 -10.420353889

H 2.014944792 -1.537551522 -10.432909012  
C -3.080223322 -6.057414532 -6.664440155  
H -1.991322279 -6.036711216 -6.755545139  
C -3.657938480 -5.591039658 -8.017192841  
C -3.522957325 -7.515161037 -6.413249493  
H -3.182255745 -7.889901638 -5.446572781  
H -4.615319252 -7.600598812 -6.435494423  
H -3.121781826 -8.174999237 -7.190432072  
H -4.750893116 -5.517985344 -7.987232208  
H -3.402929068 -6.320949554 -8.796195984  
H -3.251678228 -4.630043507 -8.334404945  
C -2.006842613 -3.201614141 -2.500409126  
H -1.078243852 -3.005521059 -3.042371273  
C -1.665771365 -4.170398712 -1.350615382  
C -2.493956804 -1.859393954 -1.925787091  
H -2.846207619 -1.180077076 -2.708276510  
H -3.312920332 -1.994319797 -1.210844159  
H -1.676270008 -1.365028620 -1.390342712  
H -2.573389530 -4.455697536 -0.806171954  
H -0.977121830 -3.698342323 -0.640237212  
H -1.193868876 -5.081863880 -1.723264813  
C -6.800337791 -4.113217354 -3.858955622  
H -7.331934929 -4.683476925 -4.632539749  
C -7.194593906 -2.631781816 -4.016104698  
C -7.240982056 -4.661050320 -2.490177870  
H -6.975785732 -5.717777252 -2.383671284  
H -6.764181137 -4.112366199 -1.670145154  
H -8.325325012 -4.564796448 -2.365784883  
H -6.696450710 -2.013009071 -3.261023998  
H -8.276030540 -2.500256777 -3.898294449  
H -6.906864643 -2.248969078 -5.000802040  
C 0.877629936 -6.206171513 -13.113462448  
O 1.093005061 -6.276684284 -11.730663300  
C 4.667603493 -5.337098122 -9.186792374  
O 3.320974588 -5.708400726 -9.293566704  
C 0.409579098 -9.203574181 -8.423240662  
O 0.950174510 -8.018990517 -8.928245544  
C -0.635204673 -6.088939667 -13.410437584  
C 1.425976753 -7.481378078 -13.790086746  
C 1.593119740 -4.969011307 -13.704718590  
C 5.251020908 -5.817820549 -7.839368820  
C 5.482495785 -5.970381260 -10.339893341  
C 4.811783791 -3.798652411 -9.271125793  
C 1.426967382 -10.355517387 -8.568500519  
C 0.053119663 -9.028082848 -6.930006027  
C -0.878535390 -9.578477859 -9.198862076  
H -1.037307620 -5.191802025 -12.927893639  
H -0.851485729 -6.021327496 -14.483389854  
H -1.163443565 -6.973443985 -13.023517609  
H 1.253814816 -7.497803211 -14.873209953  
H 2.508354902 -7.557466507 -13.620013237  
H 0.945945203 -8.365507126 -13.351418495  
H 1.183172584 -4.047718525 -13.273202896  
H 2.666516304 -5.020752430 -13.477510452  
H 1.483029604 -4.901256561 -14.793919563  
H 2.359237909 -10.081081390 -8.061097145  
H 1.066145420 -11.300955772 -8.145014763  
H 1.652328014 -10.522845268 -9.629770279



|       |              |               |               |    |              |              |              |
|-------|--------------|---------------|---------------|----|--------------|--------------|--------------|
| H     | -0.610069096 | -8.164631844  | -6.802811146  | C  | 2.365628004  | -1.993815064 | -0.097285666 |
| H     | -0.439704180 | -9.909279823  | -6.499832153  | C  | 3.529483795  | -1.539124966 | 0.528442800  |
| H     | 0.968409538  | -8.843099594  | -6.356554031  | C  | 3.503732920  | -0.614442348 | 1.573928118  |
| H     | -1.647345543 | -8.803645134  | -9.058842659  | C  | 2.237778187  | 0.710800290  | 3.294025183  |
| H     | -0.656666756 | -9.668697357  | -10.270448685 | C  | 2.456722975  | 2.124635935  | 3.311812639  |
| H     | -1.317710161 | -10.526029587 | -8.865169525  | C  | 2.634745836  | 2.767754555  | 4.565267086  |
| H     | 6.316394329  | -5.577116966  | -7.731968403  | C  | 2.449560165  | 2.032854557  | 5.749519825  |
| H     | 4.703193188  | -5.353984833  | -7.012855530  | C  | 2.191844940  | 0.663513482  | 5.747190952  |
| H     | 5.134847164  | -6.906299114  | -7.755778790  | C  | 2.129894733  | -0.006388296 | 4.510982037  |
| H     | 5.061199665  | -5.666210175  | -11.306913376 | H  | 0.232788026  | -1.889431477 | -0.077222787 |
| H     | 6.540114403  | -5.679716587  | -10.323080063 | H  | 4.486769199  | -1.900857806 | 0.170093849  |
| H     | 5.438985825  | -7.067023277  | -10.274185181 | P  | 2.246799707  | 3.331091642  | 1.867062330  |
| H     | 4.467292309  | -3.430497885  | -10.246966362 | C  | 0.468114346  | 3.014838219  | 1.402793884  |
| H     | 4.198437214  | -3.320720434  | -8.499907494  | C  | 0.034171328  | 3.766489267  | 0.135902330  |
| H     | 5.849495888  | -3.467292786  | -9.140885353  | C  | -0.448461801 | 3.364013433  | 2.584789753  |
| Na    | 2.485629797  | -7.437758923  | -10.445145607 | H  | 0.414504677  | 1.945592761  | 1.211035728  |
| Na    | 1.914963365  | -4.473627090  | -10.596038818 | H  | 0.618197799  | 3.486705303  | -0.744571745 |
| Na    | 1.817438722  | -6.281802654  | -7.740319252  | H  | 0.118881270  | 4.847737789  | 0.261682183  |
| Na    | -0.435482472 | -6.796230793  | -10.223521233 | H  | -0.172415227 | 2.824933529  | 3.496387005  |
| C     | 0.342529505  | -1.892151475  | -11.416866302 | H  | -0.404097050 | 4.437901974  | 2.799420357  |
| C     | 0.555712461  | -0.814955533  | -12.306084633 | C  | 3.213394880  | 3.027508736  | 0.289400965  |
| C     | -0.829916179 | -2.664880037  | -11.603155136 | C  | 2.916957617  | 1.816708088  | -0.604106724 |
| C     | -0.344229698 | -0.537060678  | -13.334158897 | C  | 4.717416763  | 3.220677137  | 0.536535680  |
| C     | -1.727584839 | -2.372072458  | -12.625785828 | H  | 2.866905451  | 3.919288874  | -0.248332977 |
| C     | -1.495642066 | -1.309763432  | -13.505984306 | H  | 1.853470445  | 1.571153641  | -0.656973302 |
| H     | 1.439371943  | -0.194159731  | -12.173147202 | H  | 3.434898853  | 0.923000097  | -0.267685235 |
| H     | -1.019572973 | -3.494482994  | -10.929471016 | H  | 4.921453476  | 4.170546532  | 1.040752649  |
| H     | -0.145616576 | 0.298892826   | -14.001537323 | H  | 5.131655693  | 2.421363592  | 1.153230190  |
| H     | -2.617817402 | -2.987134457  | -12.740926743 | Pd | 2.662463427  | 5.612854958  | 2.507084608  |
| H     | -2.197219610 | -1.087810040  | -14.304927826 | C  | 4.834126472  | -0.156846702 | 2.182585716  |
| C     | 2.255344629  | -3.110896111  | -5.992680073  | H  | 4.691868782  | 0.861786127  | 2.555793285  |
| H     | 3.138393641  | -3.115835190  | -5.348453522  | C  | 5.990189552  | -0.123115882 | 1.162957191  |
| H     | 2.583491087  | -3.427245378  | -6.989005089  | C  | 5.256053925  | -1.028020740 | 3.383177757  |
| H     | 1.913906932  | -2.086708307  | -6.077217579  | H  | 4.565998077  | -0.923791707 | 4.219964504  |
| O     | 2.997030020  | -5.585226536  | -5.215587616  | H  | 5.295541286  | -2.084806442 | 3.095118761  |
| C     | 3.896370888  | -5.430733681  | -4.114029408  | H  | 6.252406597  | -0.734906793 | 3.732769012  |
| H     | 3.841965675  | -4.416722298  | -3.698999643  | H  | 6.341224670  | -1.131550908 | 0.917320371  |
| H     | 3.680260897  | -6.152980804  | -3.319072723  | H  | 6.842829704  | 0.417334944  | 1.587680340  |
| H     | 4.898955345  | -5.610441208  | -4.508035183  | H  | 5.709197998  | 0.371187449  | 0.228803173  |
| C     | 1.403668404  | -7.547780514  | -3.906151772  | C  | -0.346477032 | -0.281866789 | 1.968716025  |
| H     | 1.561676979  | -7.519224644  | -2.820365906  | H  | -0.256930262 | 0.549845934  | 2.673883677  |
| H     | 0.734707654  | -8.386455536  | -4.107725143  | C  | -0.988321424 | -1.463411212 | 2.726902485  |
| H     | 2.363445759  | -7.761028767  | -4.380749702  | C  | -1.307319522 | 0.133885160  | 0.831675947  |
| C     | -1.408607364 | -6.973073483  | -3.597636938  | H  | -0.860940754 | 0.850151002  | 0.137983635  |
| H     | -2.422534466 | -6.617049694  | -3.429374456  | H  | -1.620965719 | -0.735783219 | 0.244372517  |
| H     | -1.468476415 | -7.893617630  | -4.188858509  | H  | -2.213384151 | 0.584890425  | 1.250213385  |
| H     | -0.983169734 | -7.252215385  | -2.626935482  | H  | -1.061535954 | -2.343397856 | 2.077972889  |
| H     | -4.581102848 | -1.921013474  | -6.308357716  | H  | -2.002214432 | -1.199427724 | 3.048820496  |
| H     | -3.785219669 | -1.848708391  | -8.612182617  | H  | -0.418400496 | -1.747475147 | 3.611015797  |
| H     | -1.172406077 | 1.258714199   | -4.939665794  | C  | 2.433791161  | -2.943749428 | -1.283425689 |
| H     | 0.435277551  | -0.071125031  | -3.414692163  | H  | 1.401571631  | -3.173511028 | -1.579944611 |
| ===== |              |               |               |    |              |              |              |
| 2F    |              |               |               |    |              |              |              |
| ===== |              |               |               |    |              |              |              |
| C     | 2.247737169  | -0.137434572  | 2.045093775   | C  | 3.122027159  | -4.271654606 | -0.919634461 |
| C     | 1.056117415  | -0.630776644  | 1.460670114   | C  | 3.128276110  | -2.274415731 | -2.485374451 |
| C     | 1.147011280  | -1.528095961  | 0.386702269   | H  | 2.627643585  | -1.340730786 | -2.761306286 |
|       |              |               |               | H  | 4.171932697  | -2.035642862 | -2.251006126 |
|       |              |               |               | H  | 3.124855280  | -2.938488960 | -3.357134342 |
|       |              |               |               | H  | 4.167821407  | -4.110743999 | -0.634702325 |
|       |              |               |               | H  | 3.113848925  | -4.958200455 | -1.773531914 |

H 2.618478537 -4.761765957 -0.080342263  
 C 2.294043303 6.500818729 0.753916383  
 C 3.217481852 6.465905666 -0.302298516  
 C 1.087009549 7.193808079 0.560788512  
 C 2.923503637 7.071236610 -1.529881597  
 C 0.795789719 7.796145439 -0.667230248  
 C 1.710302711 7.733460426 -1.720904827  
 H 4.174087524 5.967220783 -0.178293139  
 H 0.359820426 7.254292488 1.366249323  
 H 3.651841164 7.025573254 -2.336749554  
 H -0.150172740 8.317144394 -0.797837257  
 H 1.483845115 8.202582359 -2.674499035  
 O 2.571203709 2.678021669 6.970446110  
 C 1.368575335 3.315268517 7.406795502  
 H 1.041511178 4.087810516 6.698887825  
 H 0.558004856 2.584836006 7.533682823  
 H 1.592605710 3.780564547 8.369256973  
 C 3.054805279 4.211617947 4.742166519  
 H 2.215502024 4.917479992 4.636723518  
 H 3.453530073 4.376654625 5.744424343  
 H 3.862317801 4.486818790 4.048234463  
 C 2.042068481 -0.083131328 7.049606323  
 H 2.781881809 -0.887511075 7.129658699  
 H 2.177609921 0.584824502 7.899552345  
 H 1.055843472 -0.555877566 7.126098156  
 C 1.984855652 -1.515277505 4.563641548  
 H 2.826874971 -1.966162801 5.101650715  
 H 1.082747817 -1.805656075 5.112944603  
 H 1.946720004 -1.971395373 3.577660561  
 H -1.015170217 3.529841423 -0.078873977  
 H -1.486317992 3.107972622 2.341677666  
 H 5.257730007 3.217514992 -0.417471528  
 H 3.258558750 2.037962437 -1.623105645  
 N 3.068726301 7.440219879 3.274846792  
 H 2.324020386 8.091058731 3.011897564  
 H 3.884400845 7.819805145 2.785985708

=====  
 2F'  
 =====

C 2.017783165 -0.051638149 2.061519623  
 C 0.753877640 -0.294144839 1.468966484  
 C 0.640885770 -1.304451227 0.502676904  
 C 1.711658835 -2.114774466 0.137477815  
 C 2.937656403 -1.896621346 0.771503389  
 C 3.122269630 -0.879478455 1.709770083  
 C 2.208871126 0.914147973 3.207433462  
 C 2.829617739 2.199019909 3.080075264  
 C 3.194101572 2.892249107 4.263105392  
 C 2.779532433 2.395750999 5.511047363  
 C 2.110582829 1.180999637 5.645645618  
 C 1.878536105 0.410744160 4.489356041  
 H -0.323805094 -1.477918029 0.032481536  
 H 3.780442715 -2.525708914 0.505175948  
 P 2.949655056 3.246294975 1.504965782  
 C 1.164679170 3.306075573 0.971071601  
 C 0.953947067 3.943063736 -0.410787702  
 C 0.328882188 4.031462193 2.036431789

H 0.859310150 2.264464617 0.922175944  
 H 1.486773133 3.418155670 -1.207579970  
 H 1.270745635 4.986835480 -0.425719470  
 H 0.453350812 3.591216803 3.030791283  
 H 0.615241647 5.087409019 2.094621181  
 C 3.889506817 2.558239698 0.036407761  
 C 3.358480453 1.342593551 -0.732328117  
 C 5.384088516 2.439004898 0.369768590  
 H 3.779139280 3.432173491 -0.617899597  
 H 2.270783186 1.342666388 -0.837051570  
 H 3.633461952 0.405470490 -0.256308436  
 H 5.781888485 3.381645441 0.759572029  
 H 5.572058201 1.662479043 1.114820004  
 Pd 3.805830717 5.408449173 1.995843649  
 C 4.511690617 -0.700750351 2.333473682  
 H 4.621805191 0.354626238 2.597960472  
 C 5.663908005 -1.062085152 1.375751615  
 C 4.667918205 -1.513464570 3.634949207  
 H 3.998126030 -1.153669834 4.415989876  
 H 4.453365326 -2.573094606 3.454706430  
 H 5.694063187 -1.434610367 4.011720181  
 H 5.754504681 -2.145857811 1.242009759  
 H 6.614138603 -0.710704088 1.792286754  
 H 5.542934418 -0.611235678 0.386807114  
 C -0.529172778 0.445053130 1.864725590  
 H -0.252060175 1.296820641 2.492374659  
 C -1.478382230 -0.450775594 2.689167976  
 C -1.313494682 0.971518576 0.641142428  
 H -0.676095188 1.480967283 -0.085288733  
 H -1.818308949 0.154005274 0.115328670  
 H -2.088488102 1.674501896 0.965051115  
 H -1.751132607 -1.347713947 2.121668816  
 H -2.401820660 0.092302091 2.921061039  
 H -1.034167409 -0.773777843 3.629758835  
 C 1.562296391 -3.190716743 -0.927447736  
 H 0.515359104 -3.182104111 -1.259259105  
 C 1.865103126 -4.593457222 -0.369766414  
 C 2.444529295 -2.881863594 -2.152566671  
 H 2.215825081 -1.893796563 -2.565041304  
 H 3.506917238 -2.892477512 -1.883278251  
 H 2.292245388 -3.628166914 -2.940500021  
 H 2.907487392 -4.671536446 -0.040500473  
 H 1.701631427 -5.358985424 -1.136474609  
 H 1.225816488 -4.824699879 0.488253564  
 C 3.569657087 6.216745377 0.180253193  
 C 4.433088303 5.899234772 -0.876997113  
 C 2.541234970 7.144704819 -0.029941738  
 C 4.246938229 6.479712963 -2.137920618  
 C 2.356092691 7.714875221 -1.291887164  
 C 3.204732180 7.382363319 -2.350630760  
 H 5.257481098 5.206656456 -0.730426610  
 H 1.892035961 7.438921928 0.790125906  
 H 4.924225330 6.226521969 -2.950828552  
 H 1.549909353 8.428980827 -1.443726063  
 H 3.060098410 7.830132961 -3.330431700  
 O 3.086974382 3.113941669 6.655559063  
 C 2.150502205 4.152500629 6.957366943  
 H 2.092823267 4.894502640 6.150168896

|   |              |              |              |
|---|--------------|--------------|--------------|
| H | 1.148188829  | 3.738934040  | 7.131688118  |
| H | 2.506333351  | 4.639954567  | 7.867574215  |
| C | 4.052892208  | 4.136627197  | 4.300521374  |
| H | 3.472959757  | 5.060244083  | 4.132642269  |
| H | 4.502686501  | 4.263784409  | 5.286646843  |
| H | 4.883477211  | 4.081706047  | 3.585582495  |
| C | 1.704882026  | 0.686744690  | 7.012258530  |
| H | 2.158405066  | -0.286336184 | 7.231770992  |
| H | 2.017678738  | 1.386079431  | 7.787065029  |
| H | 0.618630171  | 0.550444067  | 7.079087734  |
| C | 1.309548259  | -0.978023291 | 4.701829910  |
| H | 1.977949858  | -1.575338006 | 5.333174706  |
| H | 0.350041300  | -0.935163617 | 5.228710651  |
| H | 1.167000651  | -1.522581458 | 3.771822691  |
| H | -0.114615440 | 3.910826683  | -0.655601203 |
| H | -0.734015524 | 3.979401112  | 1.774204731  |
| H | 5.949731827  | 2.177095175  | -0.531908572 |
| H | 3.790471315  | 1.345215201  | -1.740975022 |
| N | 4.480585098  | 7.237473488  | 2.646035194  |
| H | 5.232379913  | 7.587351799  | 2.054082632  |
| C | 3.533125401  | 8.233019829  | 2.825356483  |
| C | 2.342850685  | 7.980175972  | 3.555943489  |
| C | 3.702158689  | 9.541481972  | 2.311343431  |
| C | 1.386744618  | 8.974093437  | 3.750366449  |
| C | 2.747911930  | 10.533388138 | 2.522644997  |
| C | 1.577158689  | 10.263463974 | 3.239550114  |
| H | 2.181138992  | 6.984563828  | 3.964700222  |
| H | 4.594871044  | 9.761249542  | 1.727311254  |
| H | 0.482325286  | 8.741172791  | 4.310611725  |
| H | 2.913021564  | 11.526618958 | 2.108098984  |
| H | 0.829524219  | 11.037488937 | 3.394424677  |

=====  
2G  
=====

|   |              |             |              |
|---|--------------|-------------|--------------|
| C | 2.043527603  | 4.455417156 | 4.652115345  |
| C | 3.179077864  | 5.282402515 | 4.900063992  |
| C | 2.984384775  | 6.583607674 | 5.364669800  |
| C | 1.711692214  | 7.119668484 | 5.566277027  |
| C | 0.606573462  | 6.305863857 | 5.309278011  |
| C | 0.740312874  | 4.996726036 | 4.852926254  |
| C | 2.233793736  | 2.952080488 | 4.645542145  |
| C | 2.341378927  | 2.155740499 | 3.473917961  |
| C | 2.551987886  | 0.760419786 | 3.595420361  |
| C | 2.690311193  | 0.215154275 | 4.881817341  |
| C | 2.546784878  | 0.972597659 | 6.047093868  |
| C | 2.307353020  | 2.353298664 | 5.927985668  |
| H | 3.850996494  | 7.211121082 | 5.556799412  |
| H | -0.390682697 | 6.712993145 | 5.447064877  |
| P | 2.198432684  | 3.037970304 | 1.835705996  |
| C | 0.748526156  | 2.221835375 | 0.911348879  |
| C | 0.132069424  | 3.215291500 | -0.085414805 |
| C | -0.343299717 | 1.646295071 | 1.823061228  |
| H | 1.190167665  | 1.396952391 | 0.338572979  |
| H | 0.867525935  | 3.645654678 | -0.766746581 |
| H | -0.341230243 | 4.045582771 | 0.447087705  |
| H | 0.042454042  | 0.948089898 | 2.568852901  |
| H | -0.871077657 | 2.444356441 | 2.349021196  |

|    |              |              |              |
|----|--------------|--------------|--------------|
| C  | 3.685453892  | 2.421390295  | 0.847518682  |
| C  | 4.986507416  | 2.940627575  | 1.470371366  |
| C  | 3.587360620  | 2.779734612  | -0.644293129 |
| H  | 3.686519146  | 1.332882404  | 0.922306716  |
| H  | 5.110106945  | 2.583890915  | 2.497438669  |
| H  | 5.009841919  | 4.032505035  | 1.482001185  |
| H  | 2.723717213  | 2.311845541  | -1.125633359 |
| H  | 3.529690504  | 3.856791973  | -0.804112256 |
| Pd | 2.113213539  | 5.391394615  | 2.173155308  |
| C  | -0.512862206 | 4.168047428  | 4.597191811  |
| H  | -0.194122210 | 3.193278074  | 4.219480038  |
| C  | -1.398643255 | 4.827137470  | 3.522482395  |
| C  | -1.312274098 | 3.915345669  | 5.888103962  |
| H  | -0.706996620 | 3.392964840  | 6.634283543  |
| H  | -1.654764295 | 4.856021881  | 6.332979202  |
| H  | -2.196285963 | 3.302157879  | 5.678738117  |
| H  | -1.787932992 | 5.792138100  | 3.863953590  |
| H  | -2.256913185 | 4.188769817  | 3.281108856  |
| H  | -0.826857805 | 5.010983944  | 2.607550383  |
| C  | 4.598672867  | 4.753198147  | 4.719021797  |
| H  | 4.526609898  | 3.798003674  | 4.193917274  |
| C  | 5.285682678  | 4.488965511  | 6.071841240  |
| C  | 5.457329273  | 5.691073895  | 3.851743698  |
| H  | 4.944292545  | 5.932978153  | 2.917239666  |
| H  | 5.676661015  | 6.632353783  | 4.367412567  |
| H  | 6.415410042  | 5.216698647  | 3.611437559  |
| H  | 5.327948093  | 5.404582024  | 6.672566414  |
| H  | 6.312661171  | 4.137174129  | 5.919479370  |
| H  | 4.751063824  | 3.730831146  | 6.649421692  |
| C  | 1.536130786  | 8.546241760  | 6.058032513  |
| H  | 2.533624411  | 9.005138397  | 6.087609768  |
| C  | 0.963561058  | 8.571680069  | 7.488226414  |
| C  | 0.669418812  | 9.377368927  | 5.094184399  |
| H  | 1.042512774  | 9.275474548  | 4.071779251  |
| H  | -0.370674640 | 9.030489922  | 5.102155209  |
| H  | 0.668200195  | 10.432640076 | 5.390744686  |
| H  | -0.032940507 | 8.115480423  | 7.515370846  |
| H  | 0.869622648  | 9.601438522  | 7.851650238  |
| H  | 1.603181005  | 8.018685341  | 8.184527397  |
| C  | 2.552842379  | 6.018462181  | 0.305183381  |
| C  | 3.883723974  | 6.275995731  | -0.064308234 |
| C  | 1.547756672  | 6.262280941  | -0.644030750 |
| C  | 4.201910019  | 6.712119579  | -1.354777336 |
| C  | 1.866407990  | 6.697993755  | -1.935115099 |
| C  | 3.195608616  | 6.917082310  | -2.300993919 |
| H  | 4.688692570  | 6.129962444  | 0.650120437  |
| H  | 0.504918814  | 6.111941814  | -0.382489622 |
| H  | 5.241960049  | 6.892943859  | -1.618272185 |
| H  | 1.068682194  | 6.869256496  | -2.654983521 |
| H  | 3.442968369  | 7.254302025  | -3.304010391 |
| O  | 2.922949791  | -1.148288488 | 4.997423172  |
| C  | 4.308119774  | -1.491486907 | 5.036880016  |
| H  | 4.831954479  | -1.162565589 | 4.129563808  |
| H  | 4.805221081  | -1.045964003 | 5.909113884  |
| H  | 4.360735416  | -2.580387115 | 5.108262539  |
| C  | 2.608330727  | -0.230690867 | 2.450119257  |
| H  | 3.641639471  | -0.450221419 | 2.154812336  |
| H  | 2.166481495  | -1.177991509 | 2.765902996  |

|   |              |              |              |
|---|--------------|--------------|--------------|
| H | 2.078367233  | 0.112102516  | 1.565582275  |
| C | 2.639264584  | 0.306154937  | 7.398501396  |
| H | 1.776037097  | 0.558291614  | 8.023606300  |
| H | 2.678800106  | -0.778386474 | 7.294750690  |
| H | 3.531340837  | 0.635951042  | 7.946030617  |
| C | 2.130847931  | 3.142523289  | 7.211724758  |
| H | 1.226223230  | 2.817920208  | 7.740523815  |
| H | 2.967029572  | 2.971341372  | 7.898812771  |
| H | 2.049508572  | 4.214254379  | 7.048156261  |
| H | -0.637475014 | 2.710863829  | -0.682613611 |
| H | -1.082557321 | 1.115217805  | 1.212008357  |
| H | 4.482625008  | 2.410896063  | -1.159312963 |
| H | 5.847073078  | 2.589278221  | 0.888889551  |
| N | 1.964879870  | 7.391055107  | 2.552760363  |
| H | 1.623259187  | 7.875676632  | 1.719020128  |
| H | 2.924877405  | 7.738243580  | 2.642874479  |

=====  
2G'  
=====

|    |              |             |              |
|----|--------------|-------------|--------------|
| C  | 2.206534386  | 4.445416927 | 4.669416904  |
| C  | 3.421451807  | 5.049262047 | 5.114170551  |
| C  | 3.387867451  | 6.346073627 | 5.623777866  |
| C  | 2.210425854  | 7.095049858 | 5.686194420  |
| C  | 1.033510685  | 6.507980347 | 5.216297150  |
| C  | 1.000706673  | 5.202886105 | 4.721441269  |
| C  | 2.140345812  | 2.932747602 | 4.612548351  |
| C  | 2.235080481  | 2.159378052 | 3.423699141  |
| C  | 2.207615376  | 0.745470941 | 3.507804632  |
| C  | 2.139222860  | 0.152712584 | 4.778796673  |
| C  | 1.999588847  | 0.893249512 | 5.954939365  |
| C  | 1.983966947  | 2.296769381 | 5.869280338  |
| H  | 4.311240196  | 6.798062325 | 5.977897167  |
| H  | 0.111589558  | 7.081656456 | 5.241168499  |
| P  | 2.407938004  | 3.082419395 | 1.809964299  |
| C  | 0.948922217  | 2.544866323 | 0.715891898  |
| C  | 0.614450753  | 3.649698496 | -0.297375500 |
| C  | -0.311074495 | 2.137818098 | 1.491677284  |
| H  | 1.309226155  | 1.671174407 | 0.158726051  |
| H  | 1.478345990  | 3.962870598 | -0.885280132 |
| H  | 0.234546021  | 4.538217068 | 0.215174377  |
| H  | -0.122864284 | 1.369656086 | 2.244668007  |
| H  | -0.756683111 | 2.999245405 | 1.992690921  |
| C  | 3.870389462  | 2.242657185 | 0.960435331  |
| C  | 5.165642262  | 2.522122860 | 1.731954932  |
| C  | 3.995679617  | 2.623478174 | -0.523464024 |
| H  | 3.678352118  | 1.169811606 | 1.005198240  |
| H  | 5.105757713  | 2.161772013 | 2.763453722  |
| H  | 5.387600422  | 3.590775013 | 1.755830407  |
| H  | 3.121604919  | 2.315939665 | -1.104676962 |
| H  | 4.141552925  | 3.695008993 | -0.660422325 |
| Pd | 2.677268028  | 5.386832237 | 2.228224993  |
| C  | -0.338460714 | 4.589990616 | 4.322695255  |
| H  | -0.144929677 | 3.575926781 | 3.963479757  |
| C  | -1.006022692 | 5.374811649 | 3.180127621  |
| C  | -1.288384914 | 4.471900940 | 5.529080868  |
| H  | -0.842901170 | 3.875158310 | 6.329724789  |
| H  | -1.529398799 | 5.458088875 | 5.940311432  |

|   |              |              |               |
|---|--------------|--------------|---------------|
| H | -2.228452444 | 3.993493080  | 5.231694698   |
| H | -1.235761166 | 6.402388096  | 3.480630159   |
| H | -1.946992755 | 4.899917603  | 2.878985405   |
| H | -0.347993821 | 5.423517704  | 2.307771206   |
| C | 4.746908665  | 4.294863224  | 5.068379402   |
| H | 4.574398041  | 3.363308907  | 4.524396896   |
| C | 5.249565601  | 3.923192978  | 6.475444317   |
| C | 5.822753429  | 5.086105347  | 4.301848888   |
| H | 5.453942776  | 5.389493465  | 3.318316460   |
| H | 6.118388653  | 5.991793156  | 4.842581749   |
| H | 6.721552372  | 4.474990368  | 4.162502289   |
| H | 5.395098686  | 4.819111824  | 7.089363098   |
| H | 6.209715843  | 3.397814989  | 6.414594650   |
| H | 4.540161610  | 3.272238016  | 6.992635727   |
| C | 2.209728479  | 8.494145393  | 6.282587528   |
| H | 3.231819391  | 8.701350212  | 6.628052235   |
| C | 1.281423807  | 8.571399689  | 7.509665012   |
| C | 1.842397451  | 9.566039085  | 5.241687775   |
| H | 2.550855875  | 9.575480461  | 4.411861897   |
| H | 0.852409720  | 9.381062508  | 4.811413288   |
| H | 1.829592705  | 10.558931351 | 5.705875397   |
| H | 0.236286730  | 8.407182693  | 7.224280834   |
| H | 1.344786048  | 9.559385300  | 7.979117870   |
| H | 1.546663165  | 7.817619801  | 8.258657455   |
| C | 3.412959814  | 5.955412865  | 0.431463480   |
| C | 4.798497200  | 5.991392612  | 0.219083726   |
| C | 2.566957712  | 6.427497387  | -0.578972876  |
| C | 5.322324276  | 6.445001125  | -0.5997163653 |
| C | 3.091376305  | 6.872416973  | -1.796506405  |
| C | 4.470263004  | 6.876597404  | -2.014975309  |
| H | 5.485820770  | 5.666100025  | 0.995112956   |
| H | 1.496509552  | 6.486163616  | -0.413558602  |
| H | 6.400393009  | 6.463064194  | -1.143360019  |
| H | 2.416032076  | 7.231441975  | -2.569858789  |
| H | 4.876524448  | 7.228172779  | -2.959604979  |
| O | 2.151020050  | -1.232319474 | 4.860254288   |
| C | 3.459595919  | -1.786101341 | 5.002192974   |
| H | 4.106420040  | -1.516615272 | 4.156782150   |
| H | 3.937728167  | -1.446699739 | 5.930914402   |
| H | 3.340159655  | -2.871545792 | 5.032756805   |
| C | 2.211095810  | -0.214614779 | 2.334748983   |
| H | 3.218078136  | -0.594310462 | 2.123460531   |
| H | 1.594629526  | -1.083457947 | 2.574164391   |
| H | 1.828210711  | 0.230206788  | 1.420207858   |
| C | 1.858695745  | 0.187356576  | 7.281698227   |
| H | 0.974597335  | 0.538865864  | 7.824418545   |
| H | 1.764503479  | -0.889488339 | 7.141034126   |
| H | 2.723066807  | 0.380148947  | 7.929638386   |
| C | 1.789882302  | 3.069208860  | 7.160614967   |
| H | 0.806497753  | 2.848500490  | 7.593642235   |
| H | 2.529113293  | 2.771795273  | 7.912388802   |
| H | 1.860841036  | 4.146444798  | 7.033099651   |
| H | -0.162137136 | 3.296083212  | -0.986316442  |
| H | -1.057434082 | 1.748376012  | 0.789556205   |
| H | 4.864439964  | 2.107857704  | -0.950181127  |
| H | 6.006756783  | 2.012670517  | 1.247227907   |
| N | 2.942203283  | 7.377681255  | 2.686870098   |
| H | 3.942792654  | 7.552446365  | 2.766301394   |

C 2.358160019 8.401179314 1.965919971  
C 0.971635044 8.383485794 1.685120702  
C 3.086508274 9.533798218 1.532530665  
C 0.358346939 9.432199478 1.008435607  
C 2.462524176 10.584930420 0.866734862  
C 1.092905879 10.547089577 0.590459228  
H 0.393201381 7.528352261 2.014092922  
H 4.158396721 9.568766594 1.719340563  
H -0.709686041 9.380892754 0.805844605  
H 3.056964636 11.437891960 0.546452105  
H 0.609979808 11.365221024 0.064205386

=====  
2G-TS  
=====

C 2.058894634 4.392246246 4.716533184  
C 3.198266983 5.216643810 4.920949936  
C 3.015481710 6.549770355 5.296346664  
C 1.748327255 7.111497402 5.461002827  
C 0.638759434 6.289763927 5.255171299  
C 0.763868511 4.948289394 4.884053230  
C 2.247142315 2.891314983 4.653247356  
C 2.356975079 2.136900663 3.449007273  
C 2.597284555 0.743609369 3.526190281  
C 2.750182867 0.155034274 4.792219162  
C 2.597899437 0.867800236 5.983158112  
C 2.339109659 2.248148680 5.911775112  
H 3.888167381 7.180096626 5.447523594  
H -0.356895477 6.709268093 5.369905472  
P 2.173574924 3.053089380 1.827340245  
C 0.724073410 2.235006094 0.902034581  
C 0.075234719 3.255113125 -0.048781153  
C -0.340289325 1.613009572 1.815231085  
H 1.166398168 1.437555790 0.291463912  
H 0.796330988 3.736393690 -0.711679935  
H -0.416289926 4.049682617 0.520781100  
H 0.068519004 0.873145819 2.506802559  
H -0.844879806 2.381321669 2.404932022  
C 3.647969246 2.503859043 0.780343592  
C 4.958375931 3.005026102 1.397109985  
C 3.506217003 2.979064941 -0.675399125  
H 3.664871693 1.412699938 0.774935603  
H 5.094655991 2.637416363 2.418916702  
H 4.983693600 4.097190380 1.415517926  
H 2.655919313 2.513144970 -1.181674600  
H 3.397224665 4.062769890 -0.742262006  
Pd 2.042930603 5.355322838 2.104534388  
C -0.497701138 4.118176937 4.674219608  
H -0.189224020 3.128988266 4.324546814  
C -1.404439092 4.740701199 3.595150948  
C -1.275213361 3.919835329 5.987705708  
H -0.658129156 3.429293633 6.745382309  
H -1.607155681 4.880652428 6.396795273  
H -2.164495230 3.301550627 5.820103168  
H -1.803422689 5.708303452 3.918733597  
H -2.258128643 4.086811543 3.381134987  
H -0.847291291 4.907095432 2.668041706  
C 4.613526344 4.675038815 4.745306492

H 4.533780575 3.711028337 4.237111568  
C 5.305243492 4.430857658 6.099179745  
C 5.474116325 5.590663433 3.857017040  
H 4.943496704 5.837168694 2.934333324  
H 5.725827217 6.529056072 4.363068104  
H 6.415482998 5.094996929 3.595129251  
H 5.361644745 5.359200001 6.679121971  
H 6.327402592 4.063686371 5.949483871  
H 4.764854431 3.692373991 6.696487427  
C 1.586670399 8.575088501 5.840371609  
H 2.593637943 9.011045456 5.892576694  
C 0.936771095 8.728947639 7.227699280  
C 0.798063695 9.354237556 4.770911694  
H 1.243104696 9.206850052 3.783285618  
H -0.240051940 9.006052017 4.717373371  
H 0.778847873 10.424729347 5.006525993  
H -0.076825425 8.311843872 7.231967926  
H 0.863543630 9.785779953 7.508858681  
H 1.515887618 8.207879066 7.997117043  
C 2.550026894 6.387091637 0.385954201  
C 3.922786474 6.547260284 0.092089437  
C 1.632115483 6.408601284 -0.687185466  
C 4.356667519 6.672474861 -1.227539420  
C 2.081631899 6.532111168 -2.001428604  
C 3.445071220 6.657926083 -2.286846638  
H 4.650530338 6.564322948 0.898371041  
H 0.569449544 6.304846287 -0.487594694  
H 5.421167374 6.775032520 -1.428151965  
H 1.356366873 6.522181034 -2.812590361  
H 3.788472414 6.750953197 -3.313018799  
O 3.008601904 -1.207476616 4.860860825  
C 4.400014877 -1.525028825 4.874158382  
H 4.907099724 -1.157552004 3.972127914  
H 4.898584843 -1.097844839 5.754782200  
H 4.474358559 -2.614486933 4.910061359  
C 2.678254128 -0.204249114 2.346307278  
H 3.715214252 -0.361261100 2.025295258  
H 2.287352800 -1.181899309 2.635008574  
H 2.116635323 0.144508466 1.484028101  
C 2.706273794 0.157023147 7.310439587  
H 1.844032645 0.377620608 7.948689938  
H 2.758193970 -0.922760248 7.169052124  
H 3.597759247 0.478117377 7.864169598  
C 2.162523746 2.991771936 7.222578526  
H 1.264778018 2.640026569 7.745992661  
H 3.004603624 2.807473660 7.899109840  
H 2.069013834 4.067610264 7.092499733  
H -0.682403505 2.756491661 -0.666255951  
H -1.103406429 1.118647456 1.202421308  
H 4.407255650 2.699144840 -1.234449029  
H 5.809971809 2.656773090 0.800114453  
N 1.982698441 7.422763824 1.985755920  
H 1.280930758 7.941163063 1.469163418  
H 2.822023153 7.990880489 2.032329082

=====  
2G'-TS  
=====



C 0.903324187 4.985805988 4.724878311  
 C 2.254201174 2.827787399 4.591789246  
 C 2.226751328 1.903726935 3.506022453  
 C 2.451964140 0.529464424 3.770836353  
 C 2.695291758 0.119751565 5.091573238  
 C 2.670244455 1.002367377 6.172933102  
 C 2.454809904 2.367825747 5.919133186  
 H 4.186986446 7.051326275 4.715596199  
 H -0.064179942 6.850931168 5.158488750  
 P 1.903919578 2.565246820 1.769759893  
 C 0.366931617 1.614600897 1.147843719  
 C -0.353614300 2.434935093 0.063252866  
 C -0.620787919 1.254977465 2.266164780  
 H 0.725454271 0.688219905 0.681258798  
 H 0.306470662 2.709609747 -0.762553573  
 H -0.743077219 3.366554260 0.485289663  
 H -0.171977326 0.641357303 3.050775051  
 H -1.017625928 2.160355091 2.733648777  
 C 3.269422770 1.795436502 0.695720792  
 C 4.654192448 1.954884887 1.334371448  
 C 3.253861904 2.436315536 -0.701876462  
 H 3.055658102 0.729519665 0.577291310  
 H 4.712267876 1.492155433 2.324270487  
 H 4.909171104 3.013083696 1.438291430  
 H 2.317303658 2.246421814 -1.233520627  
 H 3.383859396 3.521396160 -0.630711854  
 Pd 1.729064703 4.788069725 1.670620322  
 C -0.411136210 4.214058876 4.743543625  
 H -0.183332339 3.172651529 4.500083447  
 C -1.379727125 4.741474152 3.668805122  
 C -1.071888804 4.232305527 6.133149147  
 H -0.406696767 3.818814278 6.896207809  
 H -1.332326770 5.253410339 6.434603214  
 H -1.994381070 3.640600920 6.128396034  
 H -1.688964248 5.771364689 3.882414103  
 H -2.286313772 4.126521111 3.627674103  
 H -0.897312045 4.725313187 2.685017586  
 C 4.678451538 4.469237804 4.129969120  
 H 4.488862991 3.455561638 3.771115541  
 C 5.557783604 4.357164860 5.388565063  
 C 5.409632683 5.222561359 3.004193544  
 H 4.760011673 5.333348751 2.129908085  
 H 5.723280430 6.223853588 3.319360018  
 H 6.312614441 4.678319931 2.704475880  
 H 5.753696918 5.345579624 5.820332527  
 H 6.523742676 3.898592710 5.146384239  
 H 5.074333191 3.744606495 6.155126572  
 C 2.041130781 8.617661476 5.316275597  
 H 3.074512243 8.982010841 5.236008167  
 C 1.577003837 8.840305328 6.768069267  
 C 1.189218163 9.445902824 4.335372448  
 H 1.583325028 9.388691902 3.315140009  
 H 0.149370700 9.099309921 4.321191311  
 H 1.180883646 10.502233505 4.626854897  
 H 0.539397478 8.513268471 6.900217533  
 H 1.631793618 9.901013374 7.038390636  
 H 2.197030067 8.273221970 7.469627380  
 C 2.399150133 7.692696571 0.843712389

C 3.529179811 8.213586807 1.484674692  
 C 2.271078825 7.824462891 -0.544612348  
 C 4.523305893 8.845921516 0.739158332  
 C 3.266574860 8.462682724 -1.279378653  
 C 4.401370049 8.975646973 -0.644745588  
 H 3.635124445 8.093803406 2.557244301  
 H 1.402164578 7.401735783 -1.042972445  
 H 5.399751186 9.238414764 1.248253465  
 H 3.158288240 8.551996231 -2.357103825  
 H 5.178988457 9.466204643 -1.222674131  
 O 2.933000326 -1.225959897 5.344684601  
 C 4.312841415 -1.582214475 5.272542477  
 H 4.727154255 -1.388553262 4.274036884  
 H 4.907277107 -1.028898358 6.012350559  
 H 4.374185562 -2.652082205 5.486674786  
 C 2.455794096 -0.563495278 2.722654343  
 H 3.432817698 -0.641015112 2.232494354  
 H 2.249268293 -1.526250243 3.191761494  
 H 1.712020993 -0.400541514 1.946758866  
 C 2.880768061 0.487419307 7.576604366  
 H 2.089604855 0.835840225 8.249254227  
 H 2.885754824 -0.602638960 7.591992855  
 H 3.829817057 0.844449997 7.996809483  
 C 2.461923838 3.297588587 7.119415283  
 H 1.628079891 3.065821409 7.793684483  
 H 3.378171682 3.171568632 7.707919121  
 H 2.384243727 4.346868038 6.847540379  
 H -1.192079782 1.855881929 -0.3468080571  
 H -1.471197963 0.702636659 1.848267436  
 H 4.068558693 2.022809267 -1.310325027  
 H 5.417607307 1.490425348 0.698070228  
 N 1.402248621 7.000760555 1.587921143  
 H 0.466151893 7.135735989 1.219102859  
 H 1.411850691 7.225137234 2.581292868

=====  
 2H'  
 =====

C 2.261462450 4.380936623 4.606956482  
 C 3.575568676 4.903583050 4.733736992  
 C 3.742464066 6.250915051 5.065320969  
 C 2.661093712 7.122224808 5.245302677  
 C 1.376221418 6.595829487 5.085690975  
 C 1.155846953 5.246765137 4.782034397  
 C 2.069764376 2.877788067 4.607845306  
 C 1.971732259 2.058789015 3.444714069  
 C 1.879443407 0.653028011 3.601252079  
 C 1.903306365 0.109699145 4.896079540  
 C 1.946955085 0.899848819 6.046275616  
 C 2.031607389 2.295154333 5.899685383  
 H 4.751072884 6.637084961 5.195520401  
 H 0.515420973 7.245833874 5.210370064  
 P 1.987467289 2.902549982 1.761521697  
 C 0.340780079 2.394079685 0.926445365  
 C -0.102628469 3.478128433 -0.071831815  
 C -0.802357197 2.102888346 1.908978105  
 H 0.553944588 1.481945515 0.353488386  
 H 0.693645716 3.767033339 -0.761871517

H -0.413301736 4.380895615 0.462398857  
H -0.563339889 1.312467813 2.623589277  
H -1.060748100 2.999657869 2.477779150  
C 3.229263783 1.911746144 0.725591779  
C 4.574801922 1.789507985 1.449144006  
C 3.410931110 2.587946177 -0.643211544  
H 2.827887058 0.910696208 0.551057994  
H 4.478889465 1.275723815 2.411139250  
H 5.001158237 2.779868364 1.633945465  
H 2.483725548 2.595260382 -1.224519014  
H 3.740840912 3.625276566 -0.521280646  
Pd 2.452422142 5.085062027 1.844696403  
C -0.277268618 4.751368523 4.631833076  
H -0.232361078 3.698035955 4.341509342  
C -1.012675881 5.516790867 3.515468836  
C -1.055603385 4.831491947 5.957145691  
H -0.563987255 4.252289772 6.743988514  
H -1.136949539 5.867430687 6.305659771  
H -2.072059155 4.440956593 5.831717491  
H -1.151561618 6.571737766 3.777155638  
H -2.005785465 5.087065697 3.338368416  
H -0.438928843 5.478305340 2.585011244  
C 4.806440353 4.025996685 4.525539875  
H 4.466321468 3.085763216 4.086420059  
C 5.498275280 3.692985535 5.859786034  
C 5.800458908 4.655838966 3.534224272  
H 5.296118259 4.932624340 2.603355408  
H 6.270035267 5.558276176 3.940488100  
H 6.603194714 3.947339058 3.299232721  
H 5.828320026 4.606768608 6.367801189  
H 6.380743980 3.064528227 5.691189766  
H 4.824448109 3.157495975 6.534232616  
C 2.908043623 8.568547249 5.659223080  
H 3.916997671 8.837869644 5.310338020  
C 2.904370308 8.691456795 7.197427750  
C 1.920370579 9.569270134 5.034710407  
H 1.870175362 9.472741127 3.944189310  
H 0.903855562 9.430604935 5.424255848  
H 2.221080303 10.596410751 5.269858360  
H 1.918368936 8.424007416 7.598074436  
H 3.134414673 9.716329575 7.511189938  
H 3.643110275 8.019096375 7.648230076  
C 4.092347145 7.651757717 1.310776114  
C 5.148101807 7.893957615 2.194256783  
C 4.331146240 7.661598682 -0.070236474  
C 6.435214043 8.115447998 1.701635599  
C 5.615705013 7.892547131 -0.552560627  
C 6.679975033 8.115518570 0.328039557  
H 4.961705208 7.887610435 3.262874842  
H 3.507320642 7.475601673 -0.752080858  
H 7.248186111 8.292868614 2.401072264  
H 5.787589073 7.892634869 -1.625901937  
H 7.681510925 8.290490150 -0.053397629  
O 1.835691571 -1.270281792 5.045751095  
C 3.113918066 -1.904199719 5.045576096  
H 3.651352406 -1.727439761 4.104278088  
H 3.736707211 -1.546804190 5.877050400  
H 2.934842825 -2.975892305 5.162462711

C 1.746947289 -0.341598600 2.466338158  
H 2.727496147 -0.632332504 2.071597576  
H 1.261481524 -1.249385357 2.827749968  
H 1.161529303 0.046532121 1.636253119  
C 1.908578873 0.256716460 7.411124229  
H 1.129502177 0.705362141 8.036511421  
H 1.709235072 -0.812067151 7.331560612  
H 2.857232809 0.395538509 7.944653034  
C 2.084339142 3.119932175 7.172811985  
H 1.149113417 3.019630909 7.737785816  
H 2.883954525 2.770364285 7.836146355  
H 2.246016979 4.178709030 6.987202644  
H -0.957228541 3.118178368 -0.659845412  
H -1.698906660 1.798269272 1.355067253  
H 4.162996292 2.045661449 -1.230507970  
H 5.287085056 1.226627707 0.833106756  
N 2.773199320 7.364805222 1.802435398  
H 2.734106302 7.502909184 2.814092875  
C 1.707977533 8.124108315 1.165128827  
C 0.671933651 7.453042984 0.518733263  
C 1.729546785 9.522860527 1.190959215  
C -0.360772550 8.178939819 -0.078301236  
C 0.696914554 10.245189667 0.594564378  
C -0.352555841 9.573976517 -0.039118506  
H 0.702590525 6.365574360 0.501470029  
H 2.562982798 10.036043167 1.663509727  
H -1.169493318 7.650007248 -0.575909734  
H 0.714345634 11.331674576 0.619799018  
H -1.155887961 10.138153076 -0.505067229

2I

C 4.283358574 -2.619251251 -6.518058777  
C 5.154838562 -2.633757114 -7.645873547  
C 5.132162094 -1.549663305 -8.532552719  
C 4.318106174 -0.437822461 -8.352967262  
C 3.530207634 -0.401521713 -7.203547478  
C 3.505254030 -1.447435379 -6.279105663  
C 4.263944626 -3.703371525 -5.452208519  
C 3.152666330 -4.601621151 -5.248919010  
C 3.093271732 -5.373697281 -4.065997124  
C 4.229649067 -5.420248985 -3.238301039  
C 5.343181133 -4.612803936 -3.442056656  
C 5.319823265 -3.695869684 -4.514913082  
H 5.781991005 -1.575614810 -9.403105736  
H 2.915671349 0.473885238 -7.022974491  
P 1.877243996 -4.838903427 -6.603879929  
C 0.525599480 -3.569080114 -6.284521103  
C 0.072862513 -3.500470400 -4.816570759  
C -0.698768079 -3.686446905 -7.204482079  
H 1.048046112 -2.651693106 -6.565845013  
H 0.899508774 -3.465830088 -4.104404926  
H -0.566820383 -4.351793289 -4.557660103  
H -0.413567752 -3.714290142 -8.257506371  
H -1.312570572 -4.557973862 -6.951770306  
C 1.008542180 -6.525917053 -6.523141861  
C 1.877576351 -7.749298096 -6.162980080



C 0.292412311 -6.817347050 -7.857960701  
H 0.234111458 -6.389908791 -5.760627747  
H 2.693610430 -7.530498028 -5.476955891  
H 2.325948238 -8.175498962 -7.061542988  
H -0.379274338 -6.025123119 -8.182423592  
H 1.021673560 -6.989790916 -8.651485443  
Pd 2.809886217 -4.535279751 -8.624811172  
Cl 1.649877071 -2.640792608 -9.552684784  
C 3.783798933 -6.292737484 -8.380841255  
C 3.577430725 -7.143279076 -9.481848717  
C 4.669317245 -6.706605434 -7.376343727  
C 4.261174202 -8.360046387 -9.589079857  
C 5.359318733 -7.918540001 -7.488814831  
C 5.156348228 -8.751991272 -8.590811729  
H 2.889509201 -6.859259605 -10.277967453  
H 4.833896637 -6.091576576 -6.498897552  
H 4.090912819 -8.998996735 -10.453204155  
H 6.052112103 -8.214360237 -6.703621387  
H 5.685710430 -9.698204994 -8.671710014  
C 2.728095293 -1.226188898 -4.976615429  
H 2.425117493 -2.198317528 -4.587374210  
C 1.460125685 -0.363273084 -5.138384342  
C 3.635076761 -0.584234774 -3.906044245  
H 4.470115185 -1.235085845 -3.641340494  
H 4.043715954 0.363425672 -4.273630142  
H 3.064195871 -0.378283411 -2.992191315  
H 1.709156990 0.695683420 -5.266039848  
H 0.841627777 -0.438073635 -4.236825943  
H 0.854258180 -0.663629889 -5.998930931  
C 4.304451466 0.696958303 -9.364485741  
H 5.024231911 0.440343559 -10.153738976  
C 4.763392448 2.023392200 -8.730127335  
C 2.919082642 0.846014977 -10.020084381  
H 2.614022255 -0.083984964 -10.506074905  
H 2.156065941 1.092584252 -9.273158073  
H 2.933742046 1.650570869 -10.765398979  
H 4.064037800 2.351351976 -7.952335835  
H 4.812310219 2.816288233 -9.485275269  
H 5.753043175 1.924857259 -8.271113396  
C 6.188236237 -3.724363327 -7.948480129  
H 6.023895741 -4.556923389 -7.262934208  
C 7.636396408 -3.215696096 -7.751739979  
C 6.092735767 -4.261521816 -9.393320084  
H 5.070424080 -4.526711464 -9.676304817  
H 6.454273224 -3.525582790 -10.118961334  
H 6.701004505 -5.166835308 -9.499123573  
H 7.873468876 -2.439244986 -8.487766266  
H 8.345766068 -4.038374424 -7.903292179  
H 7.813543320 -2.796133518 -6.762378693  
C 6.449784279 -2.691061497 -4.570285797  
H 6.521924973 -2.142322540 -3.623304605  
H 7.415231228 -3.190992832 -4.709866524  
H 6.317834854 -1.960772991 -5.365138531  
C 6.508358002 -4.666057587 -2.484107971  
H 6.327925205 -5.385906219 -1.686156034  
H 7.436118603 -4.937983513 -3.002086639  
H 6.682930946 -3.688786030 -2.019344330  
C 1.878786445 -6.088937283 -3.504820585

H 0.975861728 -5.917189598 -4.077775955  
H 2.023928165 -7.168342590 -3.415684700  
H 1.702628016 -5.717610836 -2.490516901  
O 4.187708378 -6.257172108 -2.133504391  
C 4.683029652 -7.571513176 -2.400541782  
H 4.126432419 -8.056424141 -3.214658737  
H 5.747114658 -7.548600674 -2.672744036  
H 4.556861401 -8.148636818 -1.481711745  
H -0.297141850 -7.734388828 -7.737132549  
H 1.239750504 -8.514403343 -5.705918312  
H -0.525001168 -2.593695879 -4.677092075  
H -1.323712945 -2.796965361 -7.058741570

=====  
3  
=====

C 2.406837702 4.488880157 5.017493725  
C 3.523064137 5.342628479 5.188040733  
C 3.316629887 6.704729080 5.445629597  
C 2.040476799 7.254289150 5.554703236  
C 0.948794067 6.400543213 5.364458084  
C 1.097615957 5.042444706 5.077826977  
C 2.574508667 2.986007452 5.093605042  
C 2.729606390 2.126397371 3.969023705  
C 2.836409807 0.729512155 4.171438694  
C 2.756346703 0.228145495 5.480317116  
C 2.636065483 1.057793856 6.599150658  
C 2.548851252 2.448001146 6.404561520  
H 4.185151577 7.343778610 5.567619801  
H -0.052224983 6.821512222 5.408689976  
P 2.745551348 2.923585176 2.278819561  
C 1.551635742 1.902839899 1.228600740  
C 1.355975270 2.553814411 -0.157163471  
C 0.394327044 1.728241682 -1.028508186  
C -0.958576024 1.526032805 -0.330296874  
C -0.772417128 0.890521169 1.056119680  
C 0.192356646 1.714337230 1.925464869  
H 1.995667338 0.916521966 1.059530139  
H 2.318181753 2.660251141 -0.670146406  
H 0.960949719 3.567759275 -0.021897176  
H 0.255554110 2.221563816 -1.998740315  
H 0.844514668 0.746694922 -1.238322258  
H -1.451511979 2.502207518 -0.213929310  
H -1.739438653 0.789408386 1.564300418  
H -0.372053295 -0.127525494 0.936501801  
H 0.325445861 1.234098434 2.901666403  
H -0.244807705 2.701958418 2.116261482  
H -1.621808648 0.909570754 -0.949432969  
C 4.411632538 2.480683565 1.471568346  
C 5.556512833 2.196065664 2.462196589  
C 6.852867126 1.828253508 1.720515251  
C 7.266729832 2.934144974 0.738418519  
C 6.129899502 3.250594616 -0.243932813  
C 4.832138538 3.605592728 0.499017417  
H 4.240046501 1.571433067 0.876189411  
H 5.285619259 1.402846336 3.164909601  
H 5.737462997 3.093848228 3.060419559  
H 7.654127121 1.639212608 2.445842981

H 6.700950623 0.888580799 1.168917894  
H 7.512121677 3.843207121 1.306686044  
H 6.413845062 4.078073025 -0.906340361  
H 5.954676151 2.377110243 -0.889690042  
H 4.034170151 3.825140715 -0.215277225  
H 4.972349167 4.532850266 1.067854047  
H 8.176106453 2.646066189 0.196550623  
Pd 2.216913700 5.196631432 2.290270805  
C -0.143595174 4.180602074 4.858639717  
H 0.192042068 3.204084635 4.498940468  
C -1.071089864 4.771388054 3.780647516  
C -0.910619020 3.952637434 6.173532009  
H -0.282071680 3.459324121 6.919931889  
H -1.250229001 4.904980183 6.596354961  
H -1.793683171 3.325678110 6.003802776  
H -1.503217816 5.727881908 4.092661858  
H -1.898534179 4.083323956 3.571562290  
H -0.518086791 4.949160099 2.852308273  
C 4.951358795 4.817494392 5.108748913  
H 4.899929523 3.769658804 4.802769184  
C 5.655381203 4.857600689 6.476832390  
C 5.770284653 5.580656052 4.050038338  
H 5.247678280 5.597422123 3.089173794  
H 5.944234848 6.619367123 4.351778507  
H 6.751935005 5.113291264 3.907938242  
H 5.720888615 5.884129047 6.854947090  
H 6.674934387 4.462880135 6.398497105  
H 5.116857052 4.261163235 7.218302250  
C 1.790599227 8.724445343 5.862706184  
H 0.881484210 9.008707047 5.311558723  
C 2.915697336 9.661944389 5.394346714  
C 1.511938334 8.915346146 7.369965553  
H 0.678030252 8.284809113 7.701860428  
H 2.396264315 8.641273499 7.961673737  
H 1.262278318 9.958967209 7.593941689  
H 3.847476959 9.496625900 5.953759193  
H 2.624222517 10.706458092 5.549245834  
H 3.129981995 9.526617050 4.326566219  
C 3.030446053 -0.283705056 3.064508677  
H 3.652426720 0.099582747 2.257688761  
H 3.505342007 -1.181434035 3.463372469  
H 2.071973324 -0.586752057 2.627493382  
C 2.599520683 0.459248275 7.984467983  
H 1.620399475 0.607452393 8.457535744  
H 2.810012817 -0.609811127 7.951519012  
H 3.338616848 0.933409214 8.638937950  
C 2.420180321 3.317631721 7.640889168  
H 1.567337751 3.005004883 8.254751205  
H 3.308524370 3.222708225 8.277413368  
H 2.292564869 4.371763706 7.406278133  
O 2.838042736 -1.144220233 5.677344799  
C 1.574009180 -1.804638028 5.622271061  
H 0.891978979 -1.426655531 6.395991802  
H 1.095863342 -1.679067731 4.641494274  
H 1.765441656 -2.866342306 5.796159267  
C 1.836878181 7.214161396 1.552469969  
C 1.464449763 6.375438690 0.455564201  
C 3.155828714 7.751756668 1.602113724

Cl 0.553350508 8.067451477 2.471779823  
C 2.373558760 6.211430073 -0.622543812  
H 0.422319561 6.099126816 0.329279631  
C 4.035805702 7.520066738 0.555525243  
H 3.437973261 8.369183540 2.447203875  
C 3.633580685 6.783051014 -0.578839839  
H 2.057601690 5.633688450 -1.486920714  
H 5.040437698 7.931294441 0.607270122  
H 4.322010994 6.651178837 -1.408834934

=====  
3-TS  
=====

C 1.888121605 4.482499599 4.689119339  
C 2.999861479 5.311621189 5.002985954  
C 2.777234316 6.648813248 5.346113682  
C 1.499260902 7.210882187 5.380624771  
C 0.417754918 6.388773441 5.052181721  
C 0.582276285 5.044243813 4.711102009  
C 2.052760839 2.975625753 4.695702076  
C 2.285435677 2.173552752 3.540135145  
C 2.433691740 0.772195101 3.687372684  
C 2.358195305 0.217265919 4.974499702  
C 2.145268202 0.988885701 6.119874477  
C 1.969712138 2.376471281 5.976308823  
H 3.629120111 7.278804779 5.588461399  
H -0.585856616 6.804554462 5.064037800  
P 2.310317039 3.028447151 1.874442458  
C 0.959243536 2.191216469 0.831642926  
C 0.409110427 3.190691471 -0.209923133  
C -0.605931640 2.515013456 -1.146421671  
C -1.756519318 1.871896505 -0.357358038  
C -1.221026421 0.901658535 0.706413031  
C -0.208127588 1.589607000 1.637878776  
H 1.446105838 1.373003006 0.281922013  
H 1.217743039 3.644671440 -0.787925780  
H -0.073864795 4.018453598 0.324842513  
H -0.996017814 3.249244690 -1.862169266  
H -0.094280057 1.741576433 -1.738576055  
H -2.335437775 2.663558245 0.140076265  
H -2.047149897 0.486883789 1.297727108  
H -0.732115209 0.050034717 0.210260496  
H 0.151622653 0.880434871 2.388512135  
H -0.714224279 2.392243624 2.184708357  
H -2.447018862 1.354571939 -1.034870148  
C 3.902163982 2.463877678 1.028320193  
C 5.119519711 3.078138590 1.744261265  
C 6.439648628 2.725152493 1.041706800  
C 6.409786701 3.160546064 -0.429803252  
C 5.218424797 2.521900177 -1.157647848  
C 3.883349180 2.852398396 -0.466310620  
H 3.983140707 1.375354648 1.095751405  
H 5.147525787 2.737986326 2.785799503  
H 5.002368927 4.167331696 1.764929771  
H 7.275935650 3.201116085 1.569271803  
H 6.609475136 1.639490247 1.097815871  
H 6.314213753 4.253738880 -0.479340345  
H 5.178695679 2.860270977 -2.200513363

H 5.356092453 1.430326939 -1.184198856  
H 3.076678038 2.325870991 -0.988369763  
H 3.684107065 3.924540997 -0.562273502  
H 7.350133419 2.897453308 -0.929984927  
Pd 2.163451433 5.324365139 2.129849672  
C 2.669694901 6.582614899 0.353189766  
C 4.047574043 6.584890842 0.063844062  
C 1.733200192 6.464575768 -0.691163957  
C 4.473198414 6.407128811 -1.252818465  
C 2.181092024 6.273180485 -1.996284723  
C 3.550098658 6.243362904 -2.291198730  
H 4.766317844 6.730715275 0.864182472  
H 0.672483802 6.517846107 -0.467645645  
H 5.540214062 6.404784679 -1.467108250  
H 1.449114323 6.159719467 -2.793806791  
H 3.889873743 6.113183022 -3.315071583  
Cl 2.114623308 7.745875835 1.887034535  
C -0.648577750 4.207247734 4.381753922  
H -0.301041812 3.218357801 4.071781158  
C -1.442160249 4.814203262 3.209599018  
C -1.551877260 4.009828568 5.612394810  
H -1.013521552 3.514849186 6.425536156  
H -1.919471860 4.970792770 5.989329338  
H -2.422549486 3.394717455 5.357031345  
H -1.892904758 5.773656845 3.485281229  
H -2.255098343 4.144346714 2.904839039  
H -0.789196849 4.985891819 2.348490715  
C 4.427460670 4.775007248 4.971143246  
H 4.398939610 3.805797815 4.467669487  
C 4.988318443 4.545096874 6.386476040  
C 5.365834713 5.689729691 4.162136555  
H 4.925648689 5.939073086 3.192951202  
H 5.569580555 6.628431320 4.688718796  
H 6.327464581 5.193210125 3.990462780  
H 4.989141941 5.478382587 6.961478710  
H 6.020762920 4.180395603 6.336316109  
H 4.397042751 3.808403969 6.935416222  
C 1.294092774 8.657728195 5.803028584  
H 2.288439035 9.118412018 5.876141548  
C 0.636840522 8.729072571 7.195136070  
C 0.487537682 9.470377922 4.774640083  
H 0.954605460 9.430387497 3.787231207  
H -0.534205317 9.086924553 4.674424648  
H 0.416851342 10.519147873 5.084647655  
H -0.362178773 8.278032303 7.174292564  
H 0.530102253 9.769016266 7.524197578  
H 1.230544448 8.190816879 7.941334248  
C 2.695746660 -0.199246094 2.553873777  
H 3.768614769 -0.411790103 2.470250130  
H 2.207742453 -1.157255650 2.738072157  
H 2.350892067 0.168364584 1.591454148  
C 2.131709576 0.339223236 7.483471394  
H 1.124554992 0.333729774 7.919958591  
H 2.492116690 -0.688477755 7.430119514  
H 2.771788597 0.885766089 8.183944702  
C 1.692992687 3.175418139 7.236697674  
H 0.845487177 2.748358011 7.785380840  
H 2.548455954 3.147037029 7.922107220

H 1.470473886 4.220520973 7.036111355  
O 2.533628464 -1.154018998 5.106859207  
C 1.312279701 -1.887409329 5.210130215  
H 0.700236619 -1.542225003 6.053171158  
H 0.714067400 -1.800992966 4.292212486  
H 1.585799932 -2.933688879 5.366020679

=====  
3A  
=====

C 1.853822231 4.478182793 4.619055748  
C 2.941115618 5.357818604 4.914468765  
C 2.669876575 6.630751133 5.407412052  
C 1.365311503 7.096789360 5.599003792  
C 0.310220987 6.246861935 5.269541264  
C 0.521384895 4.954921722 4.782554626  
C 2.121157885 2.986874819 4.624694824  
C 2.286215544 2.186964273 3.463617086  
C 2.560278177 0.804174304 3.598751068  
C 2.712374449 0.278913558 4.891691685  
C 2.514226198 1.037294030 6.047894001  
C 2.206949949 2.402639151 5.912952900  
H 3.497745991 7.299371719 5.626073837  
H -0.709571481 6.600546360 5.380457878  
P 2.155351400 3.031216621 1.808691025  
C 0.755102336 2.161359072 0.870058835  
C 0.124534070 3.096864223 -1.079286778  
C -0.918203890 2.353349447 -1.029555678  
C -2.004518270 1.710728049 -0.155218437  
C -1.380244970 0.798621833 0.911651611  
C -0.346475542 1.557087541 1.762131214  
H 1.240556717 1.338206768 0.327828884  
H 0.890905440 3.533163786 -0.822806120  
H -0.353179455 3.935142040 0.343537778  
H -1.364558697 3.047343731 -1.752012134  
H -0.413590342 1.571948647 -1.617020249  
H -2.579231977 2.504251480 0.343824416  
H -2.157136440 0.380772322 1.563420296  
H -0.889108002 -0.055008989 0.421459764  
H 0.074765161 0.894351184 2.523218870  
H -0.855041742 2.366532803 2.293859243  
H -2.714101553 1.148158312 -0.773839235  
C 3.693374395 2.463935375 0.882976532  
C 4.956765652 3.039185762 1.552302957  
C 6.236106873 2.617219925 0.812196493  
C 6.160475731 2.970766306 -0.679589391  
C 4.934687614 2.313066244 -1.328575253  
C 3.632838726 2.749817371 -0.634534657  
H 3.734788179 1.378452897 0.994212925  
H 5.002530575 2.698504210 2.593074560  
H 4.892798424 4.130362034 1.577971339  
H 7.105238438 3.094153881 1.281763434  
H 6.377948761 1.531185746 0.918734252  
H 6.081810951 4.060792446 -0.792536318  
H 4.879661560 2.568042994 -2.393585205  
H 5.037320614 1.218852639 -1.269530296  
H 2.788351774 2.214803219 -1.083397388  
H 3.471903801 3.813135862 -0.816200197

H 7.078896046 2.660427570 -1.192664146  
Pd 1.909504652 5.334085941 2.153876305  
C -0.683067441 4.071911812 4.481244564  
H -0.306116551 3.118999958 4.102105141  
C -1.572956562 4.700841904 3.392167568  
C -1.501474142 3.762022018 5.747826576  
H -0.889772475 3.260890722 6.503526688  
H -1.904279351 4.677372456 6.194678307  
H -2.346465588 3.107004881 5.506726742  
H -2.011575937 5.644876480 3.731161594  
H -2.395877123 4.026216507 3.128086567  
H -0.994376481 4.919517994 2.489164591  
C 4.388660431 4.913624763 4.732634068  
H 4.373065948 3.980597496 4.165913105  
C 5.075107574 4.623187065 6.080259800  
C 5.202944756 5.936641216 3.918881893  
H 4.662883759 6.241177559 3.019498348  
H 5.408968925 6.843232632 4.498249531  
H 6.167878151 5.507066250 3.625896454  
H 5.056365490 5.508639336 6.725624084  
H 6.122977257 4.341938496 5.923787594  
H 4.581736088 3.805831432 6.612332344  
C 1.129269004 8.483340263 6.174320698  
H 2.069632053 9.038986206 6.064591408  
C 0.812989116 8.381778717 7.679962635  
C 0.040774532 9.270668030 5.427737236  
H 0.248475283 9.292686462 4.355353355  
H -0.950163960 8.825772285 5.574561119  
H -0.005369312 10.298379898 5.804905891  
H -0.114608593 7.819643497 7.840331078  
H 0.685522854 9.377473831 8.119454384  
H 1.614004612 7.866929054 8.221594810  
C 2.475132465 5.866534710 0.300009429  
C 3.825978756 6.162851334 0.087673150  
C 1.564144254 6.033583164 -0.745454192  
C 4.271972656 6.552531719 -1.178807259  
C 2.015899897 6.417386055 -2.012696266  
C 3.370914459 6.664284229 -2.238449812  
H 4.542358398 6.100362778 0.898687065  
H 0.503795207 5.884415150 -0.579636514  
H 5.326536655 6.771867275 -1.330196023  
H 1.298994899 6.534084797 -2.822268963  
H 3.717705250 6.962075233 -3.224406958  
Cl 1.500192285 7.667208672 2.391850948  
O 3.011141777 -1.069631338 5.019108772  
C 4.411275864 -1.341106772 5.095108032  
H 4.941213131 -0.979640484 4.203763485  
H 4.860746861 -0.875729740 5.982503891  
H 4.518054962 -2.426168442 5.162868977  
C 2.659747601 -0.204123333 2.470538616  
H 3.702781200 -0.420225799 2.210297346  
H 2.217825651 -1.150227785 2.790446758  
H 2.152652264 0.115140028 1.564495683  
C 2.614934444 0.384124160 7.405147552  
H 1.745849490 0.625370800 8.025664330  
H 2.675950766 -0.700269938 7.308925629  
H 3.500157118 0.733653963 7.951822758  
C 1.965019584 3.191578865 7.185776234

H 1.045784354 2.850006819 7.676759243  
H 2.776413918 3.038816214 7.905553341  
H 1.869405985 4.261220455 7.016524792

=====  
3B  
=====

C 4.309182167 -3.132112265 -7.175570965  
C 5.059324741 -3.978260040 -8.029998779  
C 5.378242016 -3.533992290 -9.319989204  
C 4.932721138 -2.310254812 -9.809082985  
C 4.166703701 -1.505029321 -8.960677147  
C 3.855502129 -1.868715644 -7.646789551  
C 4.259615898 -3.501588345 -5.713985443  
C 3.269709349 -4.326507568 -5.103260517  
C 3.492167234 -4.796698093 -3.776513815  
C 4.627882957 -4.345868111 -3.082888842  
C 5.548610210 -3.450865984 -3.628829479  
C 5.385922909 -3.063524723 -4.968214989  
H 5.965012074 -4.172902584 -9.974126816  
H 3.802131414 -0.559202433 -9.342030525  
P 1.715633988 -4.841924667 -6.042802334  
C 0.274067044 -4.824365139 -4.803960800  
C -1.112641096 -4.958483696 -5.480842113  
C -2.223236084 -4.995597363 -4.413896084  
C -2.190863609 -3.740973473 -3.529884100  
C -0.810020089 -3.570846796 -2.880534887  
C 0.304850996 -3.539686601 -3.939856768  
H 0.395324826 -5.697589874 -4.157931805  
H -1.167553902 -5.859344482 -6.095528126  
H -1.280299544 -4.098814964 -6.138052464  
H -3.196043730 -5.089098930 -4.911746025  
H -2.103130579 -5.892313957 -3.786299944  
H -2.403277874 -2.860996723 -4.151420116  
H -0.774589300 -2.647151709 -2.290204048  
H -0.629119515 -4.400814056 -2.179263115  
H 1.275370479 -3.406332731 -3.455624104  
H 0.152183488 -2.675576925 -4.595224380  
H -2.972492933 -3.793024063 -2.761773348  
C 2.063353062 -6.604933262 -6.642519951  
C 0.777722359 -7.380042553 -6.999351501  
C 1.120633483 -8.652704239 -7.792372227  
C 2.087296486 -9.558277130 -7.015552521  
C 3.341947079 -8.784128189 -6.583983421  
C 2.976054192 -7.514227390 -5.792456627  
H 2.590868473 -6.392852306 -7.579693317  
H 0.100335665 -6.762832642 -7.588939667  
H 0.255072117 -7.654161930 -6.072443008  
H 0.198334485 -9.194334030 -8.034754753  
H 1.571627259 -8.356239319 -8.749697685  
H 1.576966405 -9.945097923 -6.121218681  
H 3.995421886 -9.419976234 -5.973833561  
H 3.916173697 -8.502154350 -7.474587440  
H 3.881087542 -6.989232063 -5.473184586  
H 2.448215723 -7.822124958 -4.882556438  
H 2.366420984 -10.430295944 -7.619170666  
Pd 0.857550859 -3.396373749 -7.624548912  
Cl -0.517524958 -1.536084414 -6.845003605

C 1.064936280 -4.705344200 -9.092225075  
 C 2.243363142 -4.892184258 -9.813646317  
 C -0.140172318 -5.251765728 -9.558772087  
 C 2.219689846 -5.617096901 -11.011255264  
 C -0.153628230 -5.976656437 -10.756113052  
 C 1.025405884 -6.167573929 -11.481680870  
 H 3.169684887 -4.464170933 -9.460981369  
 H -1.064519763 -5.117273808 -9.001673698  
 H 3.143382311 -5.748720646 -11.570628166  
 H -1.089658499 -6.398314476 -11.114498138  
 H 1.010452986 -6.737454414 -12.406660080  
 C 3.051719666 -0.895562947 -6.771453857  
 H 2.321368217 -1.487592340 -6.208456039  
 C 2.259349823 0.135321125 -7.592851639  
 C 3.913326025 -0.130939081 -5.743821621  
 H 4.285361290 -0.781024992 -4.952499866  
 H 4.766396523 0.355786860 -6.230317116  
 H 3.307135105 0.648827195 -5.270033836  
 H 2.924145937 0.889440238 -8.032670975  
 H 1.549231529 0.648217022 -6.940860271  
 H 1.673896194 -0.332046002 -8.387332916  
 C 5.205859184 -1.897158980 -11.246459007  
 H 5.886981964 -2.643714190 -11.677862167  
 C 5.896298409 -0.525858521 -11.341681480  
 C 3.901529789 -1.921884179 -12.068285942  
 H 3.418289423 -2.902909756 -12.014940262  
 H 3.188386440 -1.182599306 -11.686455727  
 H 4.099032879 -1.687835932 -13.120589256  
 H 5.253260612 0.271330655 -10.952797890  
 H 6.128634930 -0.282856345 -12.384545326  
 H 6.829880714 -0.511969686 -10.769862175  
 C 5.571812153 -5.351809978 -7.588878155  
 H 4.976231575 -5.671322346 -6.730377674  
 C 7.042449474 -5.294427395 -7.133103848  
 C 5.413610935 -6.427796841 -8.680630684  
 H 4.388134956 -6.488203526 -9.055338860  
 H 6.070072174 -6.240413666 -9.536819458  
 H 5.690330029 -7.407643318 -8.277776718  
 H 7.676236153 -4.882494450 -7.926682949  
 H 7.410575390 -6.298257828 -6.891467094  
 H 7.160282135 -4.670914650 -6.246421337  
 C 6.469338417 -2.181582451 -5.563285351  
 H 6.498143196 -1.210405588 -5.058758736  
 H 7.458384514 -2.633141041 -5.428939342  
 H 6.327626228 -1.995384574 -6.624557495  
 C 6.694087982 -2.930489779 -2.794594049  
 H 6.544743538 -3.165449858 -1.740304232  
 H 7.653904438 -3.357108593 -3.113301516  
 H 6.785750866 -1.844098926 -2.891732454  
 C 2.610694647 -5.751409054 -2.994251728  
 H 2.025175095 -6.404737473 -3.629335642  
 H 3.216136932 -6.386902809 -2.347976923  
 H 1.923200846 -5.207450867 -2.336710930  
 O 4.814941406 -4.787165165 -1.780696869  
 C 5.756408215 -5.855985165 -1.659714699  
 H 5.436418533 -6.738660336 -2.230904102  
 H 6.754323483 -5.560740471 -2.008074522  
 H 5.805642605 -6.110419273 -0.598438084

=====  
 3C  
 =====  
 C 4.245435715 -2.614018679 -6.980832577  
 C 5.205107212 -2.772132874 -8.025953293  
 C 5.138327599 -1.923917532 -9.141443253  
 C 4.189658642 -0.914385378 -9.272364616  
 C 3.333541632 -0.703469098 -8.194656372  
 C 3.347933531 -1.509729505 -7.054897308  
 C 4.273885250 -3.450084925 -5.706842899  
 C 3.285541296 -4.440958500 -5.335878849  
 C 3.366916418 -5.037552834 -4.051088810  
 C 4.492825508 -4.777636528 -3.249906063  
 C 5.454318047 -3.832262993 -3.582937241  
 C 5.300298691 -3.120121241 -4.789422512  
 H 5.865302563 -2.054552794 -9.940130234  
 H 2.614480495 0.103245199 -8.256612778  
 P 1.915896654 -4.965928078 -6.538787842  
 C 0.383210689 -3.965275526 -6.065330505  
 C 0.104656518 -3.795775175 -4.558329582  
 C -1.052161455 -2.807217836 -4.320090771  
 C -2.324311018 -3.234956741 -5.065665722  
 C -2.039820671 -3.442202806 -6.559984207  
 C -0.896423757 -4.446412086 -6.783406258  
 H 0.624908566 -2.991946459 -6.496459007  
 H 0.999844491 -3.457376957 -4.026174068  
 H -0.179519877 -4.763028145 -4.125113964  
 H -1.244412184 -2.723517179 -3.243026972  
 H -0.750565171 -1.811190128 -4.664974689  
 H -2.695371866 -4.176818371 -4.634337902  
 H -2.941071033 -3.794203520 -7.076704979  
 H -1.762009978 -2.487962723 -7.026479721  
 H -0.709416151 -4.545403004 -7.854732513  
 H -1.201791883 -5.424560070 -6.386609077  
 H -3.117089748 -2.490377665 -4.922488213  
 C 1.369454265 -6.766517162 -6.258224487  
 C 2.420035839 -7.818950176 -5.841320515  
 C 1.710208893 -9.110742569 -5.402453423  
 C 0.863528609 -9.679195404 -6.553403378  
 C -0.105689533 -8.626080513 -7.115302563  
 C 0.623568356 -7.324151516 -7.497906208  
 H 0.623256147 -6.692810535 -5.457192421  
 H 3.089953899 -7.457678795 -5.061121464  
 H 3.052316666 -8.044184685 -6.700513840  
 H 2.452776194 -9.850290298 -5.077604294  
 H 1.068701625 -8.904920578 -4.532503605  
 H 1.539818883 -10.002420425 -7.357428551  
 H -0.630520284 -9.024172783 -7.992410660  
 H -0.878485501 -8.400718689 -6.365276814  
 H -0.084962413 -6.606237888 -7.911359310  
 H 1.355218291 -7.527671814 -8.284812927  
 H 0.313230604 -10.569462776 -6.224709988  
 Pd 2.490331173 -4.606112003 -8.727951050  
 Cl 0.840334654 -2.786550999 -9.256817818  
 C 3.684439421 -6.258849621 -8.659261703  
 C 3.537055731 -7.168215752 -9.724589348  
 C 4.669317722 -6.547693253 -7.701676369

C 4.357865334 -8.295280457 -9.842197418  
 C 5.500307083 -7.665130138 -7.822325230  
 C 5.353342533 -8.545154572 -8.895118713  
 H 2.761986494 -7.009919643 -10.472397804  
 H 4.792297840 -5.904320240 -6.839101791  
 H 4.215592384 -8.978487968 -10.676853180  
 H 6.259565830 -7.850440025 -7.065228939  
 H 5.996567249 -9.415951729 -8.988252640  
 N 3.156935453 -4.165815830 -10.789826393  
 H 3.631335735 -4.908037186 -11.297246933  
 C 2.440814257 -1.104927540 -5.889551640  
 H 2.163487673 -2.006002188 -5.340149879  
 C 1.146774888 -0.398543805 -6.332486629  
 C 3.196814537 -0.197761044 -4.896862507  
 H 4.025170326 -0.722007453 -4.419701099  
 H 3.597912073 0.683416188 -5.410638809  
 H 2.518844843 0.148248672 -4.108177185  
 H 1.347954273 0.618873179 -6.685939312  
 H 0.468164474 -0.302813739 -5.479457378  
 H 0.639186323 -0.939051390 -7.135916233  
 C 4.119906425 -0.058579624 -10.527980804  
 H 4.779006958 -0.524595439 -11.274883270  
 C 4.648082256 1.363337636 -10.262867928  
 C 2.699302912 -0.017601866 -11.120030403  
 H 2.282429457 -1.021496058 -11.239203453  
 H 2.012536287 0.527891099 -10.464365005  
 H 2.704902172 0.489382505 -12.091627121  
 H 4.029377937 1.869360685 -9.512842178  
 H 4.626509190 1.965887427 -11.178354263  
 H 5.676764011 1.341043472 -9.889169693  
 C 6.378260136 -3.760221720 -8.025793076  
 H 6.247915745 -4.457224369 -7.196400642  
 C 7.736603260 -3.043410778 -7.842416763  
 C 6.481608868 -4.569462776 -9.339109421  
 H 5.521192551 -4.970072746 -9.653271675  
 H 6.885542870 -3.950091124 -10.148341179  
 H 7.162198067 -5.415783405 -9.205296516  
 H 7.905056000 -2.330390930 -8.657248497  
 H 8.550488472 -3.777234554 -7.871508598  
 H 7.814187527 -2.494365215 -6.906643391  
 H 3.787410736 -3.374136448 -10.670561790  
 C 6.247880936 -1.957719326 -5.000470638  
 H 6.131682873 -1.226271987 -4.191877842  
 H 7.292088985 -2.283385277 -4.968381405  
 H 6.073904037 -1.437755942 -5.938473225  
 C 6.590829849 -3.536913157 -2.634494066  
 H 6.481301308 -4.098339081 -1.706845045  
 H 7.559979916 -3.786392212 -3.084043503  
 H 6.627577782 -2.472466946 -2.380277872  
 C 2.307390690 -5.866180420 -3.347815037  
 H 1.421360612 -6.037287122 -3.941072464  
 H 2.689040422 -6.837425709 -3.024466991  
 H 2.001691818 -5.338657379 -2.438702583  
 O 4.583603382 -5.436509132 -2.031774759  
 C 5.332942486 -6.650365353 -2.098553181  
 H 4.898209095 -7.353448868 -2.822491646  
 H 6.376999855 -6.461266041 -2.382295132  
 H 5.304220676 -7.094086647 -1.100577593

H 2.331034660 -3.844666719 -11.290417671

=====  
 3C'

=====  
 C 4.371978760 -2.693982840 -6.471250057  
 C 5.446029186 -2.753906965 -7.416473866  
 C 5.507123470 -1.786698341 -8.426116943  
 C 4.593365669 -0.742355168 -8.541689873  
 C 3.643880129 -0.618647218 -7.533369541  
 C 3.524957418 -1.550648212 -6.497404099  
 C 4.222800255 -3.693211555 -5.330385208  
 C 3.148308277 -4.656841278 -5.193758965  
 C 3.085912466 -5.442829609 -4.015492439  
 C 4.159580708 -5.399882317 -3.107847214  
 C 5.198285103 -4.485499859 -3.214469910  
 C 5.180138588 -3.580412149 -4.294608116  
 H 6.308195114 -1.847079635 -9.159920692  
 H 2.950428486 0.210338965 -7.571625233  
 P 1.872877598 -4.937315464 -6.571844578  
 C 0.363677830 -3.903768301 -6.104630470  
 C -0.044809531 -3.919401646 -4.617756844  
 C -1.155848742 -2.889586687 -4.342402458  
 C -2.375087261 -3.119820356 -5.246778488  
 C -1.964394689 -3.144197464 -6.725969315  
 C -0.867522895 -4.189544678 -6.990657330  
 H 0.704516292 -2.901859999 -6.371984959  
 H 0.815380394 -3.723396063 -3.969048262  
 H -0.426901847 -4.913216114 -4.351865292  
 H -1.443665862 -2.937831402 -3.284630299  
 H -0.762369812 -1.881061673 -4.516971588  
 H -2.840831518 -4.081840038 -4.985145092  
 H -2.832597971 -3.357096195 -7.361515522  
 H -1.587430120 -2.158174038 -7.027914524  
 H -0.585664690 -4.157789230 -8.045228004  
 H -1.266669989 -5.187507629 -6.762165070  
 H -3.131823063 -2.345968723 -5.068447590  
 C 1.210708618 -6.720356464 -6.599431515  
 C 2.169145823 -7.883433342 -6.263284206  
 C 1.366013527 -9.183374405 -6.089617252  
 C 0.608673275 -9.523494720 -7.383767128  
 C -0.261119336 -8.345296860 -7.852505207  
 C 0.553353488 -7.042274952 -7.967062473  
 H 0.399896860 -6.717048168 -5.860261440  
 H 2.782123566 -7.681644440 -5.384867191  
 H 2.864683628 -8.016396523 -7.091418266  
 H 2.043360472 -10.003467560 -5.820114613  
 H 0.654748797 -9.074574471 -5.257078648  
 H 1.343480468 -9.755471230 -8.167607307  
 H -0.721564412 -8.575448036 -8.821083069  
 H -1.087665677 -8.194133759 -7.142074108  
 H -0.085946269 -6.232868195 -8.319497108  
 H 1.341281056 -7.164710999 -8.715061188  
 H -0.005378963 -10.422312737 -7.247511387  
 Pd 2.717564821 -4.320623875 -8.602460861  
 Cl 1.192115545 -2.375761509 -9.077285767  
 C 3.823446512 -6.028789520 -8.577260971  
 C 3.677922249 -6.840621948 -9.715951920

C 4.712008476 -6.460494041 -7.580004692  
C 4.407607079 -8.025989532 -9.859006882  
C 5.456321239 -7.634356022 -7.729087830  
C 5.306349754 -8.427270889 -8.867940903  
H 2.993906260 -6.553941250 -10.509624481  
H 4.832134724 -5.884424210 -6.672062397  
H 4.271382809 -8.632348061 -10.751902580  
H 6.145063400 -7.933971882 -6.941809654  
H 5.875907421 -9.345989227 -8.980629921  
N 3.808538914 -3.524292946 -10.420050621  
H 4.799615383 -3.558836699 -10.201940536  
C 2.537421227 -1.238041639 -5.369568825  
H 2.158628225 -2.180141449 -4.969924927  
C 1.333648682 -0.389886737 -5.815934658  
C 3.257488251 -0.523214638 -4.207270622  
H 4.015776634 -1.158858299 -3.748963833  
H 3.745748758 0.391381323 -4.563024521  
H 2.537552118 -0.243710995 -3.429461241  
H 1.628188014 0.645767570 -6.018904209  
H 0.590936124 -0.351847589 -5.013108253  
H 0.863902271 -0.788417280 -6.719345093  
C 4.686364651 0.226390541 -9.712822914  
H 5.162513256 -0.323544383 -10.540633202  
C 5.602718353 1.417693973 -9.363663673  
C 3.311331749 0.709135711 -10.208384514  
H 2.619398117 -0.126282170 -10.365281105  
H 2.842601538 1.386280179 -9.482954979  
H 3.422068834 1.262695551 -11.147415161  
H 5.179741383 1.992508531 -8.529427528  
H 5.711474895 2.092387676 -10.220685959  
H 6.601362705 1.077244520 -9.064783096  
C 6.619112968 -3.746318102 -7.397036076  
H 6.435998917 -4.494623661 -6.622265339  
C 7.953239441 -3.029233694 -7.075107098  
C 6.835292339 -4.479005814 -8.741428375  
H 5.930728436 -4.958826542 -9.107190132  
H 7.211514473 -3.789570332 -9.507068634  
H 7.589033604 -5.264567852 -8.622715950  
H 8.231873512 -2.358736277 -7.895525455  
H 8.757395744 -3.766450882 -6.966632366  
H 7.916464329 -2.431097031 -6.167046547  
C 6.211851120 -2.474271536 -4.248561382  
H 6.120045662 -1.911774039 -3.312194586  
H 7.229181290 -2.877634525 -4.265404701  
H 6.104072571 -1.768493772 -5.067773819  
C 6.281497478 -4.434498787 -2.164516926  
H 6.088473797 -5.153923988 -1.369045854  
H 7.266021252 -4.646114349 -2.599732161  
H 6.347442627 -3.440365076 -1.708789825  
C 1.921930075 -6.287186623 -3.529543877  
H 1.076706409 -6.292867661 -4.201801300  
H 2.210007191 -7.324193001 -3.342699051  
H 1.580202222 -5.885639191 -2.570142269  
O 4.121482372 -6.257590294 -2.017818213  
C 4.786570549 -7.499516964 -2.256137133  
H 4.355092525 -8.030524254 -3.115959167  
H 5.858266354 -7.348848343 -2.443930387  
H 4.658709049 -8.104265213 -1.355261207

H 3.472414255 -2.567125797 -10.311471939  
C 3.500766039 -4.078238010 -11.697917938  
C 4.396510124 -4.959718227 -12.314524651  
C 2.269063473 -3.785414219 -12.300871849  
C 4.060206890 -5.547649860 -13.535596848  
C 1.947641373 -4.373843193 -13.523237228  
C 2.837339163 -5.256887436 -14.146292686  
H 5.340731144 -5.198425770 -11.828302383  
H 1.571204901 -3.129203796 -11.785655022  
H 4.758496761 -6.235519409 -14.007753372  
H 0.990235448 -4.145467758 -13.988322258  
H 2.577660322 -5.714136124 -15.097929955

=====  
3D  
=====

C 4.367099285 -2.522327662 -5.938591957  
C 5.437699795 -2.575567007 -6.888985157  
C 5.559706211 -1.543656945 -7.828128815  
C 4.714635372 -0.434274912 -7.854186535  
C 3.763149738 -0.338458925 -6.843726158  
C 3.575361490 -1.341243982 -5.886469841  
C 4.167252541 -3.600153446 -4.878871918  
C 3.084219933 -4.562322617 -4.862006187  
C 2.969529867 -5.442546368 -3.754487038  
C 4.009320736 -5.483166218 -2.806112528  
C 5.057053089 -4.568298817 -2.794935703  
C 5.087426186 -3.578371763 -3.800997496  
H 6.359266758 -1.599622846 -8.564672470  
H 3.119032383 0.529507697 -6.817765713  
P 1.855772853 -4.678098679 -6.300220966  
C 0.391247064 -3.598648548 -5.789663792  
C -0.059739191 -3.764658928 -4.322288990  
C -1.146209836 -2.740870476 -3.946097374  
C -2.346185207 -2.817813158 -4.900218487  
C -1.887736320 -2.662236929 -6.356664181  
C -0.826107621 -3.711209774 -6.730687141  
H 0.797326922 -2.596046686 -5.930671215  
H 0.789176583 -3.674729109 -3.636974812  
H -0.478856862 -4.769268990 -4.183107853  
H -1.461633444 -2.912014484 -2.909137011  
H -0.719534457 -1.731319785 -3.982802391  
H -2.845106125 -3.790790081 -4.776860237  
H -2.738797903 -2.744071960 -7.043132782  
H -1.465052605 -1.660586596 -6.503705502  
H -0.511374176 -3.559878588 -7.765085220  
H -1.275524735 -4.709564209 -6.646951675  
H -3.086221933 -2.049541473 -4.644982815  
C 1.072542906 -6.403030872 -6.488716602  
C 1.928060174 -7.662825584 -6.229078770  
C 1.019944429 -8.904932022 -6.201005459  
C 0.286576390 -9.070417404 -7.543382168  
C -0.470968306 -7.790497303 -7.933325291  
C 0.446613669 -6.554979801 -7.898745060  
H 0.240217745 -6.398259163 -5.773544788  
H 2.518018484 -7.591044426 -5.315724373  
H 2.643819094 -7.776255131 -7.042972565  
H 1.621113420 -9.797201157 -5.985716820

|    |              |              |               |    |              |              |               |
|----|--------------|--------------|---------------|----|--------------|--------------|---------------|
| H  | 0.288169801  | -8.812838554 | -5.384320736  | O  | -1.394052625 | -0.252951175 | -11.282883644 |
| H  | 1.030031443  | -9.291891098 | -8.322444916  | C  | 2.585938931  | -0.848873138 | -13.494144440 |
| H  | -0.901498795 | -7.895028114 | -8.936944008  | O  | 1.273141146  | -1.161405444 | -13.141925812 |
| H  | -1.315709949 | -7.635979652 | -7.245450974  | C  | -2.899725914 | -2.450362444 | -16.210569382 |
| H  | -0.110127002 | -5.671830177 | -8.207001686  | C  | -2.037779093 | -0.101297252 | -16.477020264 |
| H  | 1.252795935  | -6.678331852 | -8.625222206  | C  | -4.027175426 | -0.551037133 | -15.005919456 |
| H  | -0.398856729 | -9.926089287 | -7.506012917  | C  | -1.467107296 | -5.711322784 | -12.778450966 |
| Pd | 2.799256325  | -4.010671616 | -8.286466599  | C  | -1.858239412 | -4.909286022 | -10.427197456 |
| Cl | 1.439092994  | -1.895885229 | -8.669346809  | C  | 0.489889443  | -5.299919605 | -11.251865387 |
| C  | 3.794384956  | -5.786384106 | -8.354121208  | C  | -0.564611137 | 1.430754185  | -9.761612892  |
| C  | 3.683528662  | -6.501040936 | -9.561671257  | C  | -2.914246798 | 1.514355659  | -10.669177055 |
| C  | 4.617570400  | -6.321346760 | -7.351407051  | C  | -2.248573303 | -0.281128824 | -9.030734062  |
| C  | 4.387148380  | -7.694091320 | -9.762777328  | C  | 2.602431774  | 0.077930585  | -14.735744476 |
| C  | 5.332600117  | -7.504855633 | -7.557569504  | C  | 3.291570902  | -0.126833826 | -12.324073792 |
| C  | 5.222488403  | -8.199514389 | -8.763583183  | C  | 3.371222734  | -2.138781309 | -13.839967728 |
| H  | 3.032433271  | -6.139243603 | -10.353870392 | H  | -3.293420792 | -3.189455271 | -15.501941681 |
| H  | 4.704751968  | -5.822202682 | -6.394324303  | H  | -3.603342295 | -2.364307642 | -17.048147202 |
| H  | 4.277339935  | -8.227951050 | -10.704431534 | H  | -1.949947596 | -2.834596634 | -16.606992722 |
| H  | 5.970709801  | -7.888206959 | -6.763792992  | H  | -2.641190052 | 0.037507635  | -17.382896423 |
| H  | 5.774331570  | -9.122198105 | -8.922301292  | H  | -1.923357964 | 0.880406320  | -15.997291565 |
| N  | 3.807369471  | -3.365407705 | -10.154382706 | H  | -1.041477919 | -0.451005489 | -16.773164749 |
| H  | 3.113289833  | -3.137370110 | -10.861700058 | H  | -4.526475906 | -1.281519055 | -14.353470802 |
| H  | 4.290214062  | -2.505601883 | -9.897803307  | H  | -3.868910074 | 0.366889179  | -14.427727699 |
| C  | 2.570694447  | -1.064434886 | -4.763419628  | H  | -4.710362911 | -0.326192200 | -15.834431648 |
| H  | 2.166057110  | -2.018248081 | -4.419130802  | H  | -0.786034822 | -5.700531006 | -13.640925407 |
| C  | 1.395164251  | -0.168060511 | -5.197489738  | H  | -1.589224339 | -6.755235195 | -12.462104797 |
| C  | 3.272844791  | -0.420484364 | -3.550995111  | H  | -2.440991402 | -5.334948063 | -13.115106583 |
| H  | 4.005813122  | -1.094115019 | -3.107459307  | H  | -1.897003055 | -5.920279503 | -10.002455711 |
| H  | 3.788739920  | -0.499183923 | -3.849707127  | H  | -1.522894263 | -4.215988159 | -9.648739815  |
| H  | 2.539360046  | -0.163544372 | -2.777950287  | H  | -2.881457806 | -4.626809597 | -10.711809158 |
| H  | 1.713149667  | 0.872559309  | -5.324313164  | H  | 0.871759415  | -4.716484070 | -10.406103134 |
| H  | 0.623057723  | -0.166582093 | -4.421905518  | H  | 0.502409220  | -6.358517170 | -10.962915421 |
| H  | 0.950373232  | -0.496010780 | -6.141165733  | H  | 1.177968025  | -5.167074203 | -12.097965240 |
| C  | 4.880963802  | 0.625622272  | -8.937534332  | H  | 2.104963064  | 1.029328585  | -14.501505852 |
| H  | 5.127409458  | 0.092949301  | -9.868670464  | H  | 3.617452860  | 0.310181141  | -15.085120201 |
| C  | 6.068902016  | 1.552675128  | -8.610076904  | H  | 2.052457571  | -0.396504998 | -15.557926178 |
| C  | 3.603805304  | 1.435920000  | -9.202514648  | H  | 3.299901247  | -0.763721526 | -11.430900574 |
| H  | 2.748421192  | 0.776347995  | -9.374151230  | H  | 4.327846527  | 0.156188279  | -12.555670738 |
| H  | 3.364043713  | 2.094931841  | -8.359378815  | H  | 2.734940052  | 0.780339777  | -12.063936234 |
| H  | 3.736941099  | 2.070249081  | -10.084832191 | H  | 3.323466778  | -2.844158888 | -12.999615669 |
| H  | 5.874484062  | 2.108235598  | -7.684565067  | H  | 2.919754267  | -2.632261276 | -14.712390900 |
| H  | 6.232105255  | 2.278441906  | -9.415180206  | H  | 4.428726196  | -1.948840857 | -14.071768761 |
| H  | 6.993973732  | 0.982528925  | -8.470322609  | H  | -0.824442923 | 2.119427443  | -8.947275162  |
| C  | 6.544297695  | -3.639581919 | -6.923322678  | H  | 0.245983154  | 0.780660272  | -9.413541794  |
| H  | 6.274299145  | -4.447237015 | -6.238971233  | H  | -0.185798645 | 2.027189255  | -10.602205276 |
| C  | 7.901863575  | -3.052728415 | -6.466176510  | H  | -3.769608259 | 0.919471085  | -11.014012337 |
| C  | 6.776325226  | -4.241394520 | -8.327315331  | H  | -3.259193897 | 2.178014040  | -9.865873337  |
| H  | 5.850119591  | -4.561580658 | -8.795589447  | H  | -2.582812309 | 2.138971090  | -11.509174347 |
| H  | 7.270494938  | -3.514547110 | -8.981281281  | H  | -3.117133856 | -0.885552049 | -9.325901031  |
| H  | 7.430342197  | -5.116686821 | -8.257988930  | H  | -1.447823763 | -0.962773800 | -8.727143288  |
| H  | 8.233532906  | -2.276383400 | -7.164739132  | H  | -2.537765265 | 0.320758432  | -8.159380913  |
| H  | 8.665747643  | -3.839655399 | -6.459908009  | Na | -0.537960649 | 0.188068047  | -13.282198906 |
| H  | 7.869648933  | -2.605699062 | -5.474792957  | Na | -2.444733143 | -1.919913769 | -12.298303604 |
| C  | -2.664328575 | -1.106703639 | -15.482727051 | Na | 0.331041187  | -1.770351648 | -11.091702461 |
| O  | -1.814512968 | -1.293474555 | -14.391935349 | Na | -0.097217314 | -2.684516191 | -14.031159401 |
| C  | -0.919818521 | -4.802777767 | -11.652733803 | H  | 4.476583481  | -4.025625229 | -10.543590546 |
| O  | -0.852915227 | -3.479845285 | -12.087141037 | C  | 1.777481556  | -6.300905228 | -3.372335196  |
| C  | -1.769815445 | 0.577549756  | -10.222885132 | H  | 2.045316696  | -7.351910114 | -3.242330313  |



H 1.402823448 -5.958370686 -2.402122498  
H 0.961173832 -6.246808529 -4.076914787  
C 6.096345901 -4.610865116 -1.698366046  
H 5.853630066 -5.376761913 -0.961696386  
H 7.093813419 -4.818774223 -2.105319738  
H 6.163580894 -3.650207043 -1.176215649  
C 6.128530979 -2.491990805 -3.632786274  
H 5.984484196 -1.975368738 -2.676532507  
H 7.138003826 -2.912619352 -3.602703571  
H 6.086545944 -1.745273829 -4.421515465  
O 3.922012329 -6.425448895 -1.790460944  
C 4.585600376 -7.651277542 -2.102485657  
H 4.172816277 -8.114168167 -3.009710789  
H 5.662827969 -7.495909691 -2.250805140  
H 4.430352211 -8.319602013 -1.252240658

=====  
3D'  
=====

C 4.530327320 -2.585560083 -5.940248013  
C 5.546671391 -2.682545662 -6.943897247  
C 5.638982773 -1.674684763 -7.910113335  
C 4.815423012 -0.548222601 -7.919907093  
C 3.952228069 -0.392944604 -6.842220783  
C 3.801978350 -1.368710995 -5.849941254  
C 4.329867363 -3.659037352 -4.879225254  
C 3.180337667 -4.535649300 -4.796259403  
C 3.074493647 -5.415678978 -3.688863277  
C 4.174228668 -5.554917336 -2.823002577  
C 5.290685177 -4.732446194 -2.885143280  
C 5.322900772 -3.728678942 -3.873934269  
H 6.397302151 -1.764353633 -8.685992241  
H 3.340357065 0.495928466 -6.790323734  
P 1.853105426 -4.562309742 -6.151754856  
C 0.500638783 -3.387741089 -5.551477432  
C 0.144824296 -3.500617027 -4.053373814  
C -0.785022140 -3.444805861 -6.402686596  
H 0.953652501 -2.413730860 -5.742170334  
H 1.043244123 -3.456256390 -3.429508209  
H -0.535558224 -3.331123590 -7.459688187  
C 0.968221188 -6.241962910 -6.264092445  
C 1.788786292 -7.538242340 -6.081718445  
C 0.204985067 -6.371292114 -7.603223801  
H 0.208327651 -6.197763443 -5.474636078  
H 2.477538109 -7.485546112 -5.238549232  
H 2.407217026 -7.693347454 -6.966238976  
H -0.341645539 -5.468284130 -7.864100456  
H 0.930093646 -6.536224365 -8.401387215  
Pd 2.682797670 -3.920859575 -8.200503349  
Cl 1.436494708 -1.721232414 -8.480442047  
C 3.536494255 -5.751828671 -8.320104599  
C 3.215421200 -6.498071671 -9.466166496  
C 4.433297157 -6.309734821 -7.396838188  
C 3.781991243 -7.759416580 -9.680974007  
C 5.013408661 -7.561628819 -7.621271133  
C 4.687409878 -8.296582222 -8.762455940  
H 2.522649288 -6.106829643 -10.204806328  
H 4.686226845 -5.775009155 -6.490760803

H 3.515733480 -8.316402435 -10.576262474  
H 5.713348866 -7.964622974 -6.892216682  
H 5.128942490 -9.274823189 -8.933787346  
N 3.722274303 -3.181472063 -10.089849472  
H 3.190733910 -2.315617323 -10.185917854  
C 3.781362057 -3.932169676 -11.302416801  
C 2.683342218 -3.926130772 -12.169248581  
C 4.896760941 -4.721298695 -11.598214149  
H 1.831737757 -3.283088446 -11.972641945  
H 5.744936943 -4.732299328 -10.923342705  
C 2.703398228 -4.722108841 -13.312891006  
C 4.906404018 -5.512344360 -12.746026993  
H 1.846347570 -4.714807510 -13.981884003  
H 5.775708199 -6.127567291 -12.961295128  
C 3.808011532 -5.523983002 -13.606801033  
H 3.814650297 -6.144959450 -14.497964859  
H 4.640333652 -2.944971323 -9.720902443  
C 2.922723055 -1.026112437 -4.644225121  
H 2.472312212 -1.947257757 -4.270801067  
C 1.793316960 -0.029339893 -4.963422775  
C 3.783439159 -0.460535377 -3.494974852  
H 4.498504162 -1.196462154 -3.125653982  
H 4.342074871 0.420436203 -3.831636429  
H 3.146113873 -0.159009025 -2.655802488  
H 2.186617136 0.979679704 -5.128582001  
H 1.107610822 0.037786484 -4.113508701  
H 1.225723624 -0.314700961 -5.853649139  
C 4.897794247 0.440248907 -9.078496933  
H 4.890710354 -0.161338180 -10.000377655  
C 6.226928711 1.221084952 -9.049259186  
C 3.700756550 1.397280216 -9.157680511  
H 2.753959656 0.849035680 -9.137383461  
H 3.702300549 2.109678030 -8.324193001  
H 3.745014429 1.977731109 -10.084955215  
H 6.281215191 1.848734736 -8.152160645  
H 6.314275742 1.872568965 -9.926272392  
H 7.091855526 0.549252450 -9.038969040  
C 6.633207321 -3.765815258 -7.011346817  
H 6.416890144 -4.528723240 -6.258485794  
C 8.030509949 -3.168401718 -6.710896015  
C 6.737053394 -4.452180386 -8.387697220  
H 5.778950691 -4.830352306 -8.730274200  
H 7.138924599 -3.761026144 -9.138170242  
H 7.424933434 -5.302992344 -8.335050583  
H 8.346199036 -2.510428667 -7.527971268  
H 8.772124290 -3.972041845 -6.633168221  
H 8.065468788 -2.583906889 -5.793450832  
C -3.372529507 -1.274028301 -14.944217682  
O -2.490527153 -1.370098472 -13.867448807  
C -2.223960638 0.683713436 -9.811948776  
O -1.845463753 -0.242964938 -10.786311150  
C 1.762501836 -0.447893232 -13.362326622  
O 0.701279700 -1.156127453 -12.795403481  
C -1.554331660 -4.757180214 -11.123279572  
O -1.313419580 -3.469224930 -11.601835251  
C -4.680157185 -0.579172373 -14.498152733  
C -3.715402842 -2.684854507 -15.477408409  
C -2.729864836 -0.449876398 -16.082815170

C -3.001824379 -0.036773924 -8.688088417  
C -3.129452229 1.772059917 -10.435395241  
C -0.969532132 1.354804754 -9.203657150  
C 2.221528530 -1.124277234 -14.675524712  
C 1.331160307 1.006983161 -13.693915367  
C 2.956973791 -0.374992102 -12.383287430  
C -2.363393545 -5.576159477 -12.155920029  
C -0.215342596 -5.477723598 -10.862075806  
C -2.361137152 -4.688174248 -9.804106712  
H -4.448042393 0.399145961 -14.060879707  
H -5.388204575 -0.431559622 -15.322937012  
H -5.184082508 -1.180407405 -13.728803635  
H -4.444958687 -2.664935589 -16.296390533  
H -2.807722569 -3.180180550 -15.848283768  
H -4.122675419 -3.299463749 -14.665498734  
H -2.518094540 0.570005894 -15.735497475  
H -1.778035164 -0.908041477 -16.378099442  
H -3.369553089 -0.378147960 -16.971092224  
H -2.390102386 -0.858578265 -8.304102898  
H -3.262884855 0.623896301 -7.851618767  
H -3.935135603 -0.461764872 -9.085181236  
H -3.496628284 2.494507074 -9.695440292  
H -2.576236963 2.332681656 -11.203397751  
H -3.995527267 1.302565694 -10.919726372  
H -0.380857259 1.827955842 -10.001273155  
H -1.221800566 2.123283863 -8.461654663  
H -0.333758891 0.603376269 -8.720303535  
H -1.796849608 -5.666586399 -13.091903687  
H -2.595433712 -6.589012146 -11.803177834  
H -3.309021950 -5.069277287 -12.387134552  
H 0.384444296 -4.902812481 -10.148550987  
H -0.348387837 -6.490623951 -10.462883949  
H 0.356604517 -5.549868107 -11.792897224  
H -1.840271592 -4.046361446 -9.086862564  
H -3.353521347 -4.249946117 -9.984204292  
H -2.515025854 -5.671651363 -9.343493462  
H 3.056706190 -0.599280357 -15.156085014  
H 2.537879944 -2.152091503 -14.469635963  
H 1.386196375 -1.153350115 -15.388601303  
H 1.006032586 1.521310210 -12.778375626  
H 2.142287254 1.601144195 -14.130918503  
H 0.510892689 1.004403472 -14.427820206  
H 2.614539146 0.013378399 -11.419062614  
H 3.374789953 -1.373427629 -12.230804443  
H 3.765369415 0.270037025 -12.750299454  
Na -0.693734527 -2.700420380 -13.590162277  
Na -1.187152743 0.148662448 -12.853512764  
Na -0.084272295 -1.725319505 -10.686681747  
Na -2.951596498 -1.930098057 -11.724405289  
C 1.851464272 -6.188141346 -3.228029966  
C 2.034970760 -7.263347620 -3.166571617  
H 1.598768950 -5.860709190 -2.214490175  
H 0.980660498 -6.036634445 -3.847810268  
C 6.403143406 -4.878636837 -1.875553608  
H 6.178476334 -5.667204380 -1.157756329  
H 7.356492519 -5.110488892 -2.365932703  
H 6.556109428 -3.949310064 -1.315373540  
C 6.458703518 -2.734811068 -3.775714636

H 6.465495586 -2.263476133 -2.786032915  
H 7.429369926 -3.228610516 -3.887748718  
H 6.384681702 -1.943461061 -4.516956806  
O 4.085924625 -6.499728203 -1.811021566  
C 4.603125095 -7.778787613 -2.183188200  
H 4.089647770 -8.181448936 -3.067191362  
H 5.678611755 -7.726274014 -2.400137901  
H 4.437630653 -8.445287704 -1.333386421  
C 0.829035163 -8.732287407 -5.945159435  
H 1.403031945 -9.651043892 -5.770574570  
H 0.180800095 -8.594177246 -5.066780090  
C -0.765599847 -7.565381527 -7.538381577  
H -1.294018865 -7.654462814 -8.495235443  
H -1.532736421 -7.370615005 -6.773972511  
C -0.030953668 -8.875301361 -7.212123394  
H -0.744666815 -9.701465607 -7.104350090  
H 0.626999617 -9.131852150 -8.054452896  
H -1.283608317 -4.412957668 -6.265542984  
H -0.328890860 -4.471982002 -3.865332603  
C -1.757032037 -2.331100225 -5.980346203  
H -2.662679911 -2.388105154 -6.595057011  
H -1.297233462 -1.355876565 -6.187988281  
C -2.114117146 -2.432803631 -4.491953373  
H -2.649748564 -3.376863480 -4.311661243  
H -2.793993711 -1.622534990 -4.201968670  
C -0.846731305 -2.403201818 -3.627526999  
H -1.096840262 -2.532335520 -2.566981792  
H -0.366441607 -1.422264814 -3.721782446

=====  
3D-TS  
=====

C 3.804923296 -2.317543030 -6.575308323  
C 4.711781502 -2.358734369 -7.667787552  
C 4.953639030 -1.193467736 -8.406929016  
C 4.360465527 0.033550836 -8.096587181  
C 3.406186819 0.038661741 -7.072962284  
C 3.113435268 -1.104284883 -6.313995838  
C 3.888232231 -3.356621265 -5.460843563  
C 2.944590569 -4.400312901 -5.150217533  
C 3.108222246 -5.120501041 -3.937362194  
C 4.286058903 -4.942693233 -3.192859173  
C 5.227302551 -3.963509798 -3.487184525  
C 4.987605095 -3.120100021 -4.589747429  
H 5.694922924 -1.227166414 -9.200664520  
H 2.917321444 0.972815454 -6.815837383  
P 1.538063645 -4.823575974 -6.346490383  
C 0.054941464 -3.841718197 -5.695625305  
C -0.178020537 -3.830390692 -4.171781540  
C -1.263140678 -4.199760914 -6.413450718  
H 0.313689768 -2.828836441 -6.013188839  
H 0.742328048 -3.581410646 -3.633471966  
H -1.109711051 -4.230144978 -7.493244171  
C 0.964936197 -6.632393360 -6.139998913  
C 2.025943279 -7.725744724 -5.883875847  
C 0.117877081 -7.091705799 -7.354529381  
H 0.282092869 -6.609008312 -5.282196045  
H 2.756425858 -7.433238029 -5.129417419

|    |              |              |               |    |              |              |               |
|----|--------------|--------------|---------------|----|--------------|--------------|---------------|
| H  | 2.589837074  | -7.887403965 | -6.803171635  | C  | -1.838316917 | -1.675073743 | -15.311912537 |
| H  | -0.614035904 | -6.341635227 | -7.653265953  | C  | -1.657099366 | 0.756545484  | -14.713132858 |
| H  | 0.780000865  | -7.239725590 | -8.211927414  | C  | -1.754717469 | 0.644444406  | -9.071150780  |
| Pd | 1.914841652  | -4.370360374 | -8.631911278  | C  | -1.310651660 | 2.438638449  | -10.771386147 |
| Cl | 0.516816020  | -2.270573854 | -8.584877014  | C  | 0.133095488  | 2.258908749  | -8.722375870  |
| C  | 3.000443220  | -6.073912621 | -8.907814026  | C  | 4.580516338  | -0.185148388 | -12.204062462 |
| C  | 2.749116659  | -6.870386600 | -10.041554451 | C  | 4.161493778  | -2.487447739 | -13.102316856 |
| C  | 4.028779984  | -6.506309509 | -8.053193092  | C  | 3.293354988  | -0.478428096 | -14.335163116 |
| C  | 3.512652636  | -8.006607056 | -10.328798294 | C  | -2.093126297 | -4.903025627 | -12.733437538 |
| C  | 4.813277721  | -7.626926899 | -8.347081184  | C  | -0.793418825 | -6.006234169 | -10.882339478 |
| C  | 4.565386772  | -8.383896828 | -9.492496490  | C  | -2.338918924 | -4.092197418 | -10.364282608 |
| H  | 1.938681602  | -6.615141869 | -10.715412140 | H  | -3.132730007 | -0.040598631 | -12.529347420 |
| H  | 4.213634014  | -5.990608215 | -7.117332458  | H  | -4.013297081 | -0.528866589 | -13.992501259 |
| H  | 3.282565594  | -8.594167709 | -11.215443611 | H  | -3.275122166 | -1.761151075 | -12.950533867 |
| H  | 5.608150959  | -7.915968895 | -7.662191391  | H  | -2.667924404 | -1.490229011 | -16.005495071 |
| H  | 5.169802666  | -9.257548332 | -9.721490860  | H  | -0.900155365 | -1.607820153 | -15.878361702 |
| N  | 2.009945154  | -4.015328407 | -10.700453758 | H  | -1.935660720 | -2.697169542 | -14.929224968 |
| H  | 0.688640475  | -3.982095718 | -11.148149490 | H  | -1.650397658 | 1.492965341  | -13.899299622 |
| H  | 2.392460585  | -3.085244179 | -10.883199692 | H  | -0.711521208 | 0.835320532  | -15.266469002 |
| C  | 2.143512964  | -0.949235082 | -5.142560959  | H  | -2.470900297 | 1.025247455  | -15.398077965 |
| H  | 1.815298796  | -1.945893168 | -4.846551895  | H  | -1.309163570 | -0.103413709 | -8.407575607  |
| C  | 0.893745422  | -0.132410824 | -5.518548489  | H  | -2.421385288 | 1.283987164  | -8.479600906  |
| C  | 2.834753513  | -0.326576799 | -3.914004326  | H  | -2.387505770 | 0.126650095  | -9.808264732  |
| H  | 3.627050400  | -0.973688066 | -3.532178402  | H  | -2.005670547 | 3.128429890  | -10.276220322 |
| H  | 3.274782658  | 0.645212710  | -4.165946960  | H  | -0.542962432 | 3.039768219  | -11.277379036 |
| H  | 2.109377861  | -0.170390442 | -3.107346535  | H  | -1.869282961 | 1.882611394  | -11.533793449 |
| H  | 1.134027600  | 0.922319114  | -5.689897537  | H  | 0.902737737  | 2.864026785  | -9.211928368  |
| H  | 0.167934030  | -0.158751577 | -4.699495792  | H  | -0.517014086 | 2.928018570  | -8.144782066  |
| H  | 0.419216186  | -0.522599101 | -6.422449112  | H  | 0.626716256  | 1.572583556  | -8.025884628  |
| C  | 4.854530811  | 1.314860225  | -8.761589050  | H  | -1.404809117 | -5.326045990 | -13.474412918 |
| H  | 5.441446304  | 1.021776557  | -9.641133308  | H  | -2.939862013 | -5.589629650 | -12.618447304 |
| C  | 5.801662445  | 2.058068037  | -7.796509743  | H  | -2.469024658 | -3.951311827 | -13.119676590 |
| C  | 3.735601902  | 2.253458500  | -9.237021446  | H  | -0.242522836 | -5.847861290 | -9.952408791  |
| H  | 3.062192917  | 1.777531981  | -9.958359718  | H  | -1.592694640 | -6.731803417 | -10.694263458 |
| H  | 3.121673584  | 2.603875637  | -8.402299881  | H  | -0.107876226 | -6.438713074 | -11.618975639 |
| H  | 4.163678169  | 3.136316299  | -9.724994659  | H  | -1.797640920 | -3.826267004 | -9.452520370  |
| H  | 5.261193752  | 2.377709866  | -6.898036003  | H  | -2.824821234 | -3.189483166 | -10.760179520 |
| H  | 6.225447178  | 2.949220181  | -8.273476601  | H  | -3.135051012 | -4.800744534 | -10.108426094 |
| H  | 6.626773834  | 1.411912441  | -7.479469776  | H  | 5.522163868  | -0.085138850 | -12.757356644 |
| C  | 5.532675266  | -3.592493296 | -8.022852898  | H  | 4.166031837  | 0.818802178  | -12.049587250 |
| H  | 5.071805000  | -4.437480927 | -7.521175385  | H  | 4.807803631  | -0.615032911 | -11.223329544 |
| C  | 6.991086006  | -3.504506111 | -7.532091618  | H  | 3.464376688  | -3.152148485 | -13.632240295 |
| C  | 5.521723270  | -3.886659622 | -9.534096718  | H  | 5.096742153  | -2.469811678 | -13.674514771 |
| H  | 4.506360054  | -3.856932163 | -9.929523468  | H  | 4.365983486  | -2.932732105 | -12.124968529 |
| H  | 6.138550282  | -3.171408176 | -10.091019630 | H  | 2.546968937  | -1.069278955 | -14.882739067 |
| H  | 5.922748089  | -4.888038635 | -9.718956947  | H  | 2.911294699  | 0.549162328  | -14.253761292 |
| H  | 7.475744724  | -2.588865519 | -7.891170979  | H  | 4.201202393  | -0.439271361 | -14.948633194 |
| H  | 7.562712669  | -4.357742786 | -7.914327621  | Na | 0.780072987  | -2.546513081 | -13.179306030 |
| H  | 7.057273865  | -3.520972729 | -6.443677902  | Na | 0.777339220  | 0.496211976  | -12.577864647 |
| C  | -1.805223227 | -0.672604442 | -14.135423660 | Na | 2.036033630  | -0.616140187 | -9.948345184  |
| O  | -0.740221798 | -0.962917924 | -13.280897141 | Na | -0.798227787 | -1.460256696 | -11.004302979 |
| C  | -0.641228020 | 1.452645063  | -9.785394669  | C  | 2.087263584  | -6.005401134 | -3.244186401  |
| O  | 0.226484448  | 0.595537722  | -10.471507072 | H  | 2.464108229  | -7.013865471 | -3.057732821  |
| C  | 3.551080465  | -1.077566624 | -12.929781914 | H  | 1.869672537  | -5.574050426 | -2.261720181  |
| O  | 2.355454206  | -1.134754896 | -12.194514275 | H  | 1.153046250  | -6.092311382 | -3.778446913  |
| C  | -1.363554955 | -4.679598808 | -11.402566910 | C  | 6.428873539  | -3.774930954 | -2.591742039  |
| O  | -0.308552265 | -3.743798971 | -11.628910065 | H  | 6.371963978  | -4.431353569 | -1.723416328  |
| C  | -3.143382072 | -0.753575444 | -13.363197327 | H  | 7.362357616  | -3.985915661 | -3.128423929  |

H 6.498707294 -2.743149757 -2.230756760  
C 5.933659554 -1.937030315 -4.734408379  
H 5.802520275 -1.248063922 -3.891049623  
H 6.979740620 -2.257080317 -4.710728645  
H 5.784479141 -1.366606236 -5.645700932  
O 4.458705902 -5.726213455 -2.059918642  
C 5.176143169 -6.935019493 -2.313597679  
H 4.674499512 -7.550576210 -3.073140621  
H 6.199530602 -6.728069305 -2.654801369  
H 5.213579178 -7.484210968 -1.369726539  
C 1.333652139 -9.043442726 -5.495192051  
H 2.088202000 -9.812152863 -5.285800934  
H 0.761268437 -8.901828766 -4.565974712  
C -0.599766254 -8.412599564 -7.019122601  
H -1.195152760 -8.734403610 -7.882791519  
H -1.309688568 -8.241447449 -6.195772648  
C 0.394886822 -9.514478683 -6.618904114  
H -0.140435085 -10.424146652 -6.319300652  
H 1.002871394 -9.777337074 -7.496190071  
H -1.601077557 -5.194381237 -6.091739655  
H -0.487116873 -4.828575134 -3.835602999  
C -2.353868484 -3.172329664 -6.070221424  
H -3.282642603 -3.428798676 -6.595536709  
H -2.039976597 -2.187600851 -6.442600727  
C -2.594887972 -3.109552145 -4.554054260  
H -3.006182194 -4.072571278 -4.216282845  
H -3.344738483 -2.346103668 -4.312754154  
C -1.287275314 -2.827795506 -3.797819138  
H -1.456426024 -2.855351210 -2.713964462  
H -0.945963621 -1.813398361 -4.037333012  
H 2.645815611 -4.661748409 -11.163555145

=====  
3D'-TS  
=====

C 4.314303398 -2.445542812 -6.405132294  
C 4.965786457 -1.983010173 -7.583373070  
C 4.811694622 -0.645529628 -7.971609116  
C 4.087819099 0.276255697 -7.225330353  
C 3.520328045 -0.171303317 -6.035326004  
C 3.617777348 -1.494953752 -5.605243206  
C 4.564776897 -3.826738358 -5.822396278  
C 3.569974184 -4.863289833 -5.669598103  
C 3.889622927 -5.987668514 -4.859930992  
C 5.227277279 -6.189575672 -4.476887226  
C 6.217846870 -5.234691143 -4.665464401  
C 5.850804329 -4.008415222 -5.253808498  
H 5.296864033 -0.306605726 -8.882472038  
H 2.983236551 0.541935205 -5.422206402  
P 1.922750950 -4.820504189 -6.617641926  
C 0.635924399 -4.043943882 -5.456409931  
C 0.568606198 -4.583889484 -4.013445854  
C -0.403268099 -3.758358479 -3.145289183  
C -1.801674485 -3.651267767 -3.770834208  
C -1.714058280 -3.131135464 -5.212845325  
C -0.788285315 -4.024412155 -6.051777363  
H 0.977148592 -3.005097389 -5.439317703  
H 1.558728576 -4.590600014 -3.546059847

H 0.211119995 -5.622793674 -4.032262802  
H -0.461337596 -4.204750538 -2.144477844  
H 0.003265586 -2.750387430 -3.016809464  
H -2.276401997 -4.643944263 -3.776557922  
H -2.709690332 -3.099978209 -5.673044682  
H -1.326884866 -2.103508949 -5.225910664  
H -0.765063226 -3.672597885 -7.081851959  
H -1.202148676 -5.040350914 -6.045274734  
H -2.439644337 -3.001453638 -3.159271717  
C 1.327545285 -6.624002934 -6.851187229  
C 2.385066032 -7.661704540 -7.298343658  
C 1.811145306 -9.083476067 -7.184680939  
C 0.574157059 -9.237028122 -8.083467484  
C -0.471079707 -8.157917023 -7.764647484  
C 0.128918394 -6.739894867 -7.823590755  
H 0.950146496 -6.920386791 -5.868573666  
H 3.319105625 -7.567791462 -6.743155479  
H 2.638567209 -7.483482838 -8.342435837  
H 2.579269886 -9.814230919 -7.468080044  
H 1.538034797 -9.299983025 -6.140672684  
H 0.887255490 -9.133228302 -9.131956100  
H -1.314161420 -8.224488258 -8.464132309  
H -0.883613110 -8.335469246 -6.759952545  
H -0.649140537 -6.013981819 -7.600178242  
H 0.470166206 -6.531349659 -8.838927269  
H 0.138076574 -10.238204956 -7.977431774  
Pd 1.858686805 -3.676470518 -8.673830986  
C 2.779681206 -5.251588821 -9.529978752  
C 2.161086798 -5.966708660 -10.564496994  
C 4.079699516 -5.624072552 -9.157914162  
C 2.832489491 -6.994428635 -11.232720375  
C 4.762011528 -6.636829376 -9.837011337  
C 4.141828537 -7.326581001 -10.879656792  
H 1.149488807 -5.724648952 -10.867513657  
H 4.563008308 -5.140475273 -8.319415092  
H 2.330739021 -7.526979923 -12.037516594  
H 5.774960995 -6.895626068 -9.535206795  
H 4.668238163 -8.119263649 -11.405138969  
H 0.052909207 -2.441180468 -10.602936745  
C 3.083477974 -1.825120091 -4.208343029  
H 2.749704599 -2.863698721 -4.200403690  
C 1.893505335 -0.945856929 -3.788247108  
C 4.199628353 -1.709043622 -3.149889946  
H 4.995858669 -2.434124231 -3.324553728  
H 4.639259338 -0.705150783 -3.164970875  
H 3.795029402 -1.888683081 -2.146821976  
H 2.201205254 0.088141836 -3.599314213  
H 1.468685389 -1.319381714 -2.851804733  
H 1.109703064 -0.929201424 -4.551649570  
C 3.958883047 1.728904605 -7.659489632  
H 4.413648605 1.818762183 -8.654133797  
C 4.727130890 2.666104078 -6.708522320  
C 2.485984802 2.159712076 -7.779090405  
H 1.933982015 1.482067823 -8.434625626  
H 1.984261155 2.143817663 -6.805640697  
H 2.406791210 3.175213575 -8.182412148  
H 4.311655045 2.620657682 -5.695196152  
H 4.664813042 3.706120729 -7.049917698

H 5.784388065 2.387082577 -6.648402214  
C 5.911732197 -2.818669319 -8.451145172  
H 5.968530178 -3.826924562 -8.032856941  
C 7.348536968 -2.247972250 -8.486562729  
C 5.409320354 -2.909763336 -9.903684616  
H 4.355144024 -3.174434900 -9.941854477  
H 5.539303780 -1.948799014 -10.414362907  
H 5.966259480 -3.667440176 -10.465070724  
H 7.369609356 -1.276304603 -8.991809845  
H 8.001300812 -2.922724485 -9.053143501  
H 7.783037186 -2.111225367 -7.496922970  
H 1.978765011 -1.899494767 -10.494282722  
C 1.738794923 -3.269608259 -11.910919189  
C 3.013220310 -3.134836435 -12.500870705  
C 0.748193204 -3.943204165 -12.663797379  
C 3.281888008 -3.650846243 -13.765127182  
C 1.024892688 -4.461925983 -13.931144714  
C 2.293408155 -4.320793629 -14.493994713  
H 3.801051855 -2.640266180 -11.949432373  
H -0.241261676 -4.060103893 -12.241381645  
H 4.279896736 -3.536753178 -14.181034088  
H 0.239241600 -4.981052876 -14.475011826  
H 2.512291670 -4.728938103 -15.476392746  
C 2.928491116 -6.985651493 -4.237169743  
H 1.896970510 -6.667825699 -4.285096645  
H 2.995871305 -7.985348701 -4.674713135  
H 3.191247940 -7.095948219 -3.181491613  
C 7.620590210 -5.482534409 -4.167483330  
H 7.710923672 -6.477923870 -3.733428478  
H 8.352329254 -5.383392811 -4.977940083  
H 7.903608799 -4.754915237 -3.397868395  
C 6.885460854 -2.903453588 -5.179171085  
H 7.179362774 -2.736845493 -4.135915756  
H 7.799805641 -3.178936481 -5.714617729  
H 6.527187824 -1.956811905 -5.574428082  
O 5.543111801 -7.359033108 -3.799076080  
C 5.874349594 -8.446261406 -4.664056301  
H 5.056348801 -8.678587914 -5.359058380  
H 6.776892185 -8.226326942 -5.250509262  
H 6.061021805 -9.312248230 -4.024222851  
N 1.412244797 -2.733340979 -10.649414063  
Cl 0.846218586 -1.495144844 -7.751880169  
Na 0.056314182 -0.019167764 -9.784914970  
O -1.035057306 -2.103592396 -10.772068024  
O -1.581927180 -0.035796415 -13.521155357  
C -2.113559484 -0.181618288 -14.807876587  
C -1.227096915 0.563110471 -15.829884529  
C -3.542044163 0.403534830 -14.856162071  
C -2.173556089 -1.678952694 -15.191198349  
O 1.170709729 0.389013678 -11.757931709  
C 2.416605711 0.985570967 -11.990175247  
C 2.347682714 2.500787258 -11.677357674  
C 2.836713552 0.792810023 -13.465371132  
C 3.488858700 0.352402270 -11.080994606  
C -2.038258076 -2.969409227 -10.206814766  
C -3.126487732 -3.221151590 -11.270385742  
C -1.445830941 -4.327411652 -9.800952911  
C -2.641262054 -2.284892559 -8.967300415

O -1.671026707 1.332207918 -10.442685127  
C -2.218818188 2.312848568 -9.606689453  
C -2.945159912 3.379273415 -10.456132889  
C -3.229290485 1.671726823 -8.630873680  
C -1.098782420 2.997876883 -8.790589333  
H -0.199973658 0.180766076 -15.782713890  
H -1.586659551 0.454892159 -16.860170364  
H -1.198127508 1.634239912 -15.592021942  
H -3.987505198 0.356657475 -15.857270241  
H -4.198787212 -0.148617074 -14.170258522  
H -3.522293568 1.451439738 -14.534504890  
H -1.164491296 -2.112667084 -15.215701103  
H -2.759434462 -2.230494261 -14.446243286  
H -2.627280235 -1.844078302 -16.175945282  
H 2.003374815 2.656594276 -10.649755478  
H 3.315973520 3.001820087 -11.796664238  
H 1.642591119 3.006848097 -12.355504036  
H 3.802036524 1.261474133 -13.694314957  
H 2.919289827 -0.277650356 -13.691704750  
H 2.082578421 1.224983335 -14.136466980  
H 3.634781599 -0.695883214 -11.348421097  
H 4.462231636 0.853547871 -11.158961296  
H 3.168296337 0.385455251 -10.037492752  
H -3.843900442 -3.971370697 -10.921086311  
H -3.718751192 -2.325350046 -11.507115364  
H -2.673563957 -3.578438997 -12.200577736  
H -0.557088792 -4.190934658 -9.181900024  
H -2.178980112 -4.907866001 -9.231713295  
H -1.156490684 -4.923364639 -10.671001434  
H -1.855351567 -2.094099283 -8.232500076  
H -3.093877077 -1.317730665 -9.220666885  
H -3.419722795 -2.904648781 -8.507346153  
H -3.704011202 2.897333622 -11.084522247  
H -3.437393665 4.146936417 -9.846818924  
H -2.230018854 3.887378693 -11.117969513  
H -2.734070539 0.889108539 -8.045041084  
H -3.666055918 2.399047613 -7.935672760  
H -4.051153183 1.206897974 -9.192116737  
H -0.602406442 2.271656990 -8.134578705  
H -0.341473877 3.408751249 -9.469300270  
H -1.474936247 3.813560486 -8.160794258  
Na 0.160369813 -1.271656156 -12.853706360  
Na -2.473294258 -0.373748869 -11.540465355  
Na -0.590176940 1.644540548 -12.383111000

=====  
3E  
=====

C 3.854217529 -2.356482029 -6.571475983  
C 4.754985809 -2.454738140 -7.667475224  
C 4.995637894 -1.328945637 -8.460229874  
C 4.389302731 -0.090431705 -8.224581718  
C 3.457589388 -0.025355443 -7.183333397  
C 3.180259943 -1.126429677 -6.354833603  
C 3.920300484 -3.372391939 -5.436120510  
C 2.973520279 -4.415204525 -5.129172325  
C 3.140937805 -5.141632080 -3.919817209  
C 4.313865662 -4.955698490 -3.168341637

|    |              |              |               |   |              |              |               |
|----|--------------|--------------|---------------|---|--------------|--------------|---------------|
| C  | 5.250252724  | -3.969424725 | -3.453941822  | C | 5.581118584  | -4.051085472 | -9.474660873  |
| C  | 5.016174793  | -3.132390976 | -4.561820984  | H | 4.585175037  | -3.981439352 | -9.911021233  |
| H  | 5.727571011  | -1.404456258 | -9.258270264  | H | 6.250669003  | -3.383272886 | -10.029046059 |
| H  | 2.965242863  | 0.918666124  | -6.973879337  | H | 5.939497471  | -5.075531006 | -9.615658760  |
| P  | 1.541094065  | -4.795971394 | -6.313456059  | H | 7.512825012  | -2.739379168 | -7.808290005  |
| C  | 0.113253489  | -3.764480352 | -5.612526894  | H | 7.572684765  | -4.509811878 | -7.808006287  |
| C  | -0.055453781 | -3.751225233 | -4.079496384  | H | 7.047209740  | -3.647926569 | -6.359464645  |
| C  | -1.243113637 | -4.076542377 | -6.274175167  | C | -1.555713892 | -0.972600520 | -14.168704033 |
| H  | 0.391909748  | -2.761076212 | -5.941672325  | O | -0.556945086 | -1.161633372 | -13.213673592 |
| H  | 0.892505348  | -3.530299902 | -3.578788996  | C | -0.658729255 | 1.456634045  | -9.810241699  |
| H  | -1.133799672 | -4.090422630 | -7.358084202  | O | 0.216740042  | 0.584292173  | -10.463508606 |
| C  | 0.891980946  | -6.580049038 | -6.108988285  | C | 3.609719992  | -0.939716160 | -12.894326210 |
| C  | 1.894014597  | -7.731795311 | -5.870393753  | O | 2.456308365  | -1.075323701 | -12.109721184 |
| C  | 0.019932164  | -6.983178616 | -7.325296879  | C | -1.452711940 | -4.875264168 | -11.248189926 |
| H  | 0.214588717  | -6.530867577 | -5.247576714  | O | -0.455950648 | -3.864851236 | -11.481268883 |
| H  | 2.645287514  | -7.487986088 | -5.119147301  | C | -2.943294525 | -0.908999741 | -13.486823082 |
| H  | 2.441257000  | -7.916898727 | -6.795087814  | C | -1.544846058 | -2.129394770 | -15.193832397 |
| H  | -0.664702654 | -6.189286709 | -7.625237465  | C | -1.324170947 | 0.359195501  | -14.924979210 |
| H  | 0.678219855  | -7.166153431 | -8.179271698  | C | -1.794440389 | 0.664905548  | -9.112523079  |
| Pd | 1.914507389  | -4.377374649 | -8.620450020  | C | -1.294763088 | 2.432842255  | -10.828270912 |
| Cl | 0.504219174  | -2.280799866 | -8.588234901  | C | 0.095749609  | 2.272652388  | -8.739008904  |
| C  | 2.971305847  | -6.104331493 | -8.880223274  | C | 4.007950783  | 0.552188218  | -13.005102158 |
| C  | 2.739959955  | -6.886513233 | -10.028431892 | C | 4.780768871  | -1.723023057 | -12.269776344 |
| C  | 3.958238602  | -6.571897984 | -7.994926453  | C | 3.362652302  | -1.481494427 | -14.325821877 |
| C  | 3.481637716  | -8.041255951 | -10.297855377 | C | -2.286719561 | -4.986475468 | -12.526694298 |
| C  | 4.720044613  | -7.712402344 | -8.268767357  | C | -0.775728583 | -6.212190628 | -10.928330421 |
| C  | 4.491950512  | -8.455309868 | -9.427646637  | C | -2.332056046 | -4.428145885 | -10.070258141 |
| H  | 1.967508316  | -6.601955891 | -10.734140396 | H | -2.959575653 | -0.086924389 | -12.760080338 |
| H  | 4.129554272  | -6.066418648 | -7.050753593  | H | -3.762804270 | -0.751196265 | -14.198626518 |
| H  | 3.268231153  | -8.613649368 | -11.198613167 | H | -3.138539076 | -1.844916821 | -12.949514389 |
| H  | 5.482181549  | -8.026884079 | -7.558164120  | H | -2.326529980 | -2.029650688 | -15.957283974 |
| H  | 5.079737663  | -9.343702316 | -9.642048836  | H | -0.573269367 | -2.158395767 | -15.704564095 |
| N  | 2.053457022  | -4.019841671 | -10.695346832 | H | -1.689636350 | -3.083795071 | -14.677076340 |
| H  | 0.460453719  | -4.071614742 | -11.051596642 | H | -1.360251188 | 1.201623321  | -14.220146179 |
| H  | 2.484216213  | -3.097532988 | -10.800445557 | H | -0.337118268 | 0.343611240  | -15.405890465 |
| C  | 2.237421513  | -0.901719868 | -5.172155857  | H | -2.075659275 | 0.546734154  | -15.701669693 |
| H  | 1.917668462  | -1.878950596 | -4.809523106  | H | -1.368395925 | -0.080390595 | -8.432476044  |
| C  | 0.980564833  | -0.103447944 | -5.565200329  | H | -2.468817234 | 1.313796759  | -8.540239334  |
| C  | 2.954281569  | -0.207172155 | -3.997729540  | H | -2.415423155 | 0.146623075  | -9.859624863  |
| H  | 3.750014067  | -0.832747579 | -3.589422226  | H | -2.004546165 | 3.129867554  | -10.365289688 |
| H  | 3.393925667  | 0.744554043  | -4.318032265  | H | -0.508936286 | 3.026211739  | -11.314931870 |
| H  | 2.243851185  | 0.003495876  | -3.190167427  | H | -1.828728557 | 1.868080139  | -11.603239059 |
| H  | 1.218722224  | 0.943368435  | -5.782064915  | H | 0.890742123  | 2.858949661  | -9.212044716  |
| H  | 0.264832914  | -0.096083254 | -4.737076759  | H | -0.561721683 | 2.962314129  | -8.194712639  |
| H  | 0.494170040  | -0.528871953 | -6.446676731  | H | 0.556355715  | 1.592227101  | -8.015210152  |
| C  | 4.860601902  | 1.132368326  | -9.007916451  | H | -1.656867504 | -5.299603462 | -13.366644859 |
| H  | 5.254186153  | 0.767977834  | -9.966599464  | H | -3.093681097 | -5.717278004 | -12.405112267 |
| C  | 6.029004097  | 1.800928116  | -8.254040718  | H | -2.730851173 | -4.018661499 | -12.776971817 |
| C  | 3.764774084  | 2.163206339  | -9.318612099  | H | -0.159372941 | -6.122114658 | -10.031695366 |
| H  | 2.926847219  | 1.742052913  | -9.884739876  | H | -1.521943450 | -6.995775700 | -10.756814003 |
| H  | 3.350634336  | 2.602649927  | -8.405396461  | H | -0.135886505 | -6.525335312 | -11.760990143 |
| H  | 4.179995537  | 2.982111692  | -9.916117668  | H | -1.703807950 | -4.225340843 | -9.201164246  |
| H  | 5.688501358  | 2.183206558  | -7.284693241  | H | -2.874984980 | -3.507625341 | -10.322173119 |
| H  | 6.436388016  | 2.640748978  | -8.828516006  | H | -3.073036432 | -5.191112041 | -9.806307793  |
| H  | 6.837098122  | 1.086236715  | -8.068195343  | H | 4.946221828  | 0.702764094  | -13.552532196 |
| C  | 5.557991982  | -3.714251280 | -7.972285271  | H | 3.230463505  | 1.123588443  | -13.534022331 |
| H  | 5.068254471  | -4.535326958 | -7.457964897  | H | 4.119296551  | 0.982828081  | -12.004554749 |
| C  | 7.006225109  | -3.643061399 | -7.449037552  | H | 4.513238907  | -2.780374765 | -12.170857430 |

|    |              |               |               |    |              |              |               |
|----|--------------|---------------|---------------|----|--------------|--------------|---------------|
| H  | 5.703032494  | -1.652684331  | -12.859934807 | C  | 3.345374107  | -4.635952473 | -4.925309181  |
| H  | 4.984751225  | -1.343220472  | -11.265391350 | C  | 3.583257675  | -5.485454082 | -3.808829069  |
| H  | 3.169887781  | -2.564540148  | -14.297601700 | C  | 4.852674961  | -5.479191780 | -3.207044601  |
| H  | 2.494075537  | -0.988376856  | -14.781105995 | C  | 5.827352524  | -4.536777496 | -3.509549141  |
| H  | 4.223958015  | -1.331166029  | -14.987543106 | C  | 5.519093037  | -3.549182653 | -4.464725018  |
| Na | 0.998145878  | -2.716521740  | -12.876252174 | H  | 5.511254787  | -1.059180856 | -9.006602287  |
| Na | 0.806617737  | 0.450644135   | -12.560026169 | H  | 2.897401810  | 0.713794172  | -6.158719063  |
| Na | 2.033281803  | -0.610533655  | -9.912137032  | P  | 1.820359588  | -4.901490688 | -6.034067631  |
| Na | -0.796689332 | -1.492245674  | -10.946990967 | C  | 0.424919486  | -3.920656204 | -5.207111835  |
| C  | 2.125208139  | -6.033499241  | -3.227422476  | C  | 0.279563218  | -4.053332806 | -3.677488804  |
| H  | 2.508794546  | -7.040276051  | -3.045230150  | C  | -0.950353503 | -4.137648106 | -5.871277332  |
| H  | 1.908435941  | -5.607120037  | -2.242626429  | H  | 0.718693614  | -2.896968126 | -5.452682495  |
| H  | 1.189671993  | -6.123181820  | -3.758684158  | H  | 1.236347556  | -3.891261816 | -3.171060324  |
| C  | 6.444921017  | -3.773555040  | -2.551163197  | H  | -0.862513304 | -4.063660145 | -6.955511093  |
| H  | 6.379643440  | -4.420273781  | -1.676066399  | C  | 1.233703494  | -6.713384151 | -5.892287731  |
| H  | 7.382238388  | -3.992627621  | -3.077991724  | C  | 2.324780703  | -7.809369087 | -5.906273842  |
| H  | 6.514564514  | -2.737892866  | -2.201635361  | C  | 0.178571537  | -7.092838764 | -6.960172653  |
| C  | 5.974997997  | -1.961519361  | -4.721171379  | H  | 0.704649389  | -6.756196022 | -4.934505939  |
| H  | 5.866667747  | -1.267679453  | -3.878869534  | H  | 3.175687313  | -7.558731079 | -5.273843288  |
| H  | 7.016995907  | -2.295723915  | -4.710482121  | H  | 2.720025778  | -7.897631168 | -6.918533802  |
| H  | 5.820919037  | -1.393456340  | -5.633384228  | H  | -0.606788099 | -6.344141006 | -7.040899277  |
| O  | 4.485683441  | -5.738991737  | -2.034947634  | H  | 0.658122480  | -7.154611111 | -7.936233521  |
| C  | 5.223148823  | -6.936912537  | -2.281692266  | Pd | 1.947701454  | -4.295671940 | -8.313373566  |
| H  | 4.737479687  | -7.559957504  | -3.045469522  | Cl | 0.864061892  | -1.981777787 | -7.948462486  |
| H  | 6.246462822  | -6.715068340  | -2.613567114  | C  | 2.898362160  | -6.030713081 | -8.731100082  |
| H  | 5.260082722  | -7.485321999  | -1.337315679  | C  | 2.345177889  | -6.946868420 | -9.636894226  |
| C  | 1.130917907  | -9.011723518  | -5.487151146  | C  | 4.149003506  | -6.339794636 | -8.17660725   |
| H  | 1.842269301  | -9.823267937  | -5.288555622  | C  | 3.026853561  | -8.112276077 | -10.000480652 |
| H  | 0.573173046  | -8.845626831  | -4.553090096  | C  | 4.845183849  | -7.493227005 | -8.552841187  |
| C  | -0.772100568 | -8.262741089  | -6.998428345  | C  | 4.287834167  | -8.388609886 | -9.467698097  |
| H  | -1.385517240 | -8.544764519  | -7.863491058  | H  | 1.372887731  | -6.758947849 | -10.075776100 |
| H  | -1.470350981 | -8.057218552  | -6.173106670  | H  | 4.579144955  | -5.695436478 | -7.420468807  |
| C  | 0.160587206  | -9.421366692  | -6.608234406  | H  | 2.570514917  | -8.797972679 | -10.711054802 |
| H  | -0.423831552 | -10.301002502 | -6.310729027  | H  | 5.818586826  | -7.697597504 | -8.111206055  |
| H  | 0.748229086  | -9.713577271  | -7.490106583  | H  | 4.823610783  | -9.289044380 | -9.756478310  |
| H  | -1.595320344 | -5.066863060  | -5.954394341  | N  | 1.765414357  | -3.768264294 | -10.464488029 |
| H  | -0.376738459 | -4.742481232  | -3.734781742  | H  | 0.255192637  | -3.454966068 | -10.611218452 |
| C  | -2.290821314 | -3.024133682  | -5.875968933  | C  | 2.178441525  | -4.544452190 | -11.559734344 |
| H  | -3.247169256 | -3.252241611  | -6.363636971  | C  | 1.261386275  | -5.413970470 | -12.198488235 |
| H  | -1.967835546 | -2.044376135  | -6.253940582  | C  | 3.478386402  | -4.473456860 | -12.111997604 |
| C  | -2.465741158 | -2.965891600  | -4.350960255  | H  | 0.254808992  | -5.488358974 | -11.807826042 |
| H  | -2.885448933 | -3.920949936  | -4.001228333  | H  | 4.215710163  | -3.836656570 | -11.641621590 |
| H  | -3.185463905 | -2.186001778  | -4.073197365  | C  | 1.629392028  | -6.172943115 | -13.311379433 |
| C  | -1.119507313 | -2.721964121  | -3.652076721  | C  | 3.837137699  | -5.225247383 | -13.227367401 |
| H  | -1.240640044 | -2.752920628  | -2.561884403  | H  | 0.898254037  | -6.838713169 | -13.764366150 |
| H  | -0.762498736 | -1.714886546  | -3.899762630  | H  | 4.850172043  | -5.147195816 | -13.614751816 |
| H  | 2.729298830  | -4.666488647  | -11.100533485 | C  | 2.918920994  | -6.085586548 | -13.838165283 |

=====

3E'

=====

|   |             |              |              |   |             |              |              |
|---|-------------|--------------|--------------|---|-------------|--------------|--------------|
| C | 4.151447773 | -2.460800409 | -6.201778412 | C | 3.573079586 | -0.825865984 | -3.279639006 |
| C | 4.936696053 | -2.338979483 | -7.380540848 | H | 4.384854794 | -1.534101725 | -3.105359316 |
| C | 4.910570145 | -1.138763547 | -8.104890823 | H | 4.012558937 | 0.152958065  | -3.503906250 |
| C | 4.182956219 | -0.027583720 | -7.690672398 | H | 2.999435425 | -0.735826373 | -2.349581957 |
| C | 3.453298092 | -0.147118807 | -6.510900497 | H | 1.669688821 | 0.669261873  | -4.545100689 |
| C | 3.418713570 | -1.323153734 | -5.761058807 | H | 0.824729323 | -0.512679040 | -3.565800905 |
| C | 4.324503899 | -3.619623661 | -5.229994774 |   |             |              |              |

|   |              |              |               |    |              |               |               |
|---|--------------|--------------|---------------|----|--------------|---------------|---------------|
| H | 0.774193704  | -0.633475482 | -5.343586922  | H  | 0.276337892  | 2.455205441   | -10.245542526 |
| C | 4.231643677  | 1.292538881  | -8.448303223  | H  | -2.284247398 | -4.928089142  | -12.161239624 |
| H | 4.816592693  | 1.130740523  | -9.362554550  | H  | -3.601240635 | -4.939892769  | -10.962758064 |
| C | 4.952408791  | 2.376812458  | -7.623922348  | H  | -3.270619392 | -3.484290123  | -11.893399239 |
| C | 2.830499887  | 1.774503827  | -8.866683960  | H  | -0.432585299 | -4.919538975  | -8.937937737  |
| H | 2.321611881  | 1.023441076  | -9.477677345  | H  | -2.072831869 | -5.599780083  | -8.965451241  |
| H | 2.196312428  | 1.971558452  | -7.995655060  | H  | -0.951054811 | -5.932746887  | -10.288397789 |
| H | 2.894049406  | 2.697258472  | -9.454492569  | H  | -1.714189410 | -2.6111763716 | -8.568793297  |
| H | 4.410179615  | 2.587725401  | -6.694942951  | H  | -2.894400835 | -2.084888220  | -9.770052910  |
| H | 5.027044296  | 3.312965870  | -8.189647675  | H  | -3.269576311 | -3.473275900  | -8.746730804  |
| H | 5.964255810  | 2.056949615  | -7.353635311  | H  | 4.471619129  | -0.679960907  | -14.290745735 |
| C | 5.899140835  | -3.413055182 | -7.890948772  | H  | 3.560299158  | -2.142450333  | -13.870877266 |
| H | 5.806563854  | -4.289818764 | -7.245673656  | H  | 2.765160799  | -0.823598921  | -14.762565613 |
| C | 7.376044273  | -2.962672710 | -7.843346596  | H  | 2.597753763  | 1.571580291   | -11.868721962 |
| C | 5.570782185  | -3.823123217 | -9.338362694  | H  | 3.962412119  | 1.543971658   | -13.005110741 |
| H | 4.511072636  | -4.040958405 | -9.458498955  | H  | 2.316784382  | 1.395265460   | -13.619712830 |
| H | 5.837599277  | -3.020745277 | -10.035833359 | H  | 3.713487864  | -0.388063431  | -10.569458961 |
| H | 6.130230904  | -4.718568802 | -9.627801895  | H  | 4.148558140  | -1.856981754  | -11.434075356 |
| H | 7.543138981  | -2.100673437 | -8.498659134  | H  | 5.049209595  | -0.363264799  | -11.736887932 |
| H | 8.023065567  | -3.773954630 | -8.197604179  | Na | 0.729039609  | -2.734814882  | -13.109869003 |
| H | 7.704043865  | -2.684571981 | -6.842001915  | Na | 0.050070260  | 0.276849389   | -13.132116318 |
| C | -1.626730680 | -1.827863693 | -15.166261673 | Na | 0.657365978  | -0.848757625  | -10.281517029 |
| O | -0.976568878 | -1.542251348 | -13.960107803 | Na | -1.937008023 | -1.485402584  | -11.959445953 |
| C | -1.633244276 | 1.447426200  | -10.522064209 | C  | 2.592006207  | -6.397664070  | -3.106098890  |
| O | -1.050984740 | 0.356352538  | -11.181646347 | H  | 2.792946100  | -7.459875107  | -3.263407469  |
| C | 3.026173592  | -0.431435794 | -12.630614281 | H  | 2.674639463  | -6.226131916  | -2.029003859  |
| O | 1.758969545  | -0.920751035 | -12.282452583 | H  | 1.566313148  | -6.210609913  | -3.389206886  |
| C | -1.793390155 | -0.911254406 | -10.303566933 | C  | 7.141359806  | -4.536778927  | -2.766252518  |
| O | -0.718150377 | -3.200258017 | -10.955565453 | H  | 7.169890404  | -5.336657047  | -2.026565790  |
| C | -3.047812223 | -1.219527006 | -15.159313202 | H  | 7.986466885  | -4.663683414  | -3.453780890  |
| C | -1.739778161 | -3.357846022 | -15.360135078 | H  | 7.302068233  | -3.587785244  | -2.242075920  |
| C | -0.829843462 | -1.228641748 | -16.345670700 | C  | 6.502237797  | -2.396846294  | -4.560045719  |
| C | -1.832842588 | 1.121529460  | -9.025021553  | H  | 6.573927879  | -1.888249755  | -3.590857267  |
| C | -3.006121159 | 1.770079017  | -11.153777122 | H  | 7.511054516  | -2.753403664  | -4.791541576  |
| C | -0.716448426 | 2.684891224  | -10.648973465 | H  | 6.224886417  | -1.651671648  | -5.300271988  |
| C | 3.490184784  | -1.052079558 | -13.969422340 | O  | 5.104396820  | -6.406653404  | -2.204756021  |
| C | 2.978900909  | 1.110076904  | -12.786734581 | C  | 5.626728058  | -7.643104553  | -2.692923307  |
| C | 4.051914215  | -0.774645746 | -11.532769203 | H  | 4.961877823  | -8.101083755  | -3.437448978  |
| C | -2.793074846 | -4.338398933 | -11.392462730 | H  | 6.615521908  | -7.502780437  | -3.150736094  |
| C | -1.279913068 | -5.164899826 | -9.582580566  | H  | 5.718201160  | -8.309420586  | -1.831691265  |
| C | -2.458707333 | -2.968840837 | -9.284241676  | C  | 1.717222095  | -9.165120125  | -5.507309437  |
| H | -2.988287926 | -0.142108083 | -14.963430405 | H  | 2.502172709  | -9.931771278  | -5.489169598  |
| H | -3.578401804 | -1.367948055 | -16.107618332 | H  | 1.306295037  | -9.107810020  | -4.487866879  |
| H | -3.654441118 | -1.678499460 | -14.365758896 | C  | -0.451253951 | -8.455485344  | -6.611964226  |
| H | -2.286532402 | -3.629698992 | -16.271295547 | H  | -1.192788363 | -8.718994141  | -7.377095699  |
| H | -0.740543783 | -3.809480906 | -15.425239563 | H  | -0.999796808 | -8.370515823  | -5.661436081  |
| H | -2.257189989 | -3.804168940 | -14.502657890 | C  | 0.606530786  | -9.564185143  | -6.492939472  |
| H | -0.782331645 | -0.135729223 | -16.250799179 | H  | 0.139597908  | -10.509838104 | -6.190299034  |
| H | 0.196638465  | -1.614059448 | -16.330390930 | H  | 1.059011459  | -9.731614113  | -7.480589867  |
| H | -1.272836685 | -1.462848306 | -17.321411133 | H  | -1.326009870 | -5.139847279  | -5.626770020  |
| H | -0.869520366 | 0.916357279  | -8.542308807  | H  | -0.048271809 | -5.072225571  | -3.431116104  |
| H | -2.318580151 | 1.940415144  | -8.480098724  | C  | -1.960889459 | -3.099566460  | -5.360380173  |
| H | -2.450368643 | 0.222620174  | -8.916993141  | H  | -2.924785376 | -3.243232250  | -5.865140915  |
| H | -3.486243010 | 2.647772551  | -10.703900337 | H  | -1.607902527 | -2.095746040  | -5.632310867  |
| H | -2.886550665 | 1.956195951  | -12.228593826 | C  | -2.127218485 | -3.209192276  | -3.838038683  |
| H | -3.687340260 | 0.916626513  | -11.032195091 | H  | -2.567904472 | -4.188043118  | -3.596033096  |
| H | -0.596202672 | 2.961513996  | -11.705690384 | H  | -2.826668262 | -2.449806452  | -3.467180729  |
| H | -1.110417962 | 3.559665918  | -10.117299080 | C  | -0.773438215 | -3.072026968  | -3.125944853  |



H -0.887955606 -3.232212782 -2.046370506  
H -0.407462418 -2.048346996 -3.254145384

=====  
3F  
=====

C 3.846149206 -2.334467411 -6.523256779  
C 4.430775642 -2.130180359 -7.799952030  
C 4.439541340 -0.840337455 -8.339956284  
C 3.920250893 0.255709261 -7.657236099  
C 3.363447428 0.039141305 -6.397764206  
C 3.302948475 -1.230187893 -5.816935062  
C 4.031358242 -3.642800093 -5.787987709  
C 3.048417091 -4.684481144 -5.687269688  
C 3.311208248 -5.766038418 -4.801775455  
C 4.577223778 -5.858572960 -4.197043896  
C 5.551126480 -4.871616364 -4.305140495  
C 5.253373623 -3.731161594 -5.072681904  
H 4.871628284 -0.680980623 -9.322853088  
H 2.940513134 0.881802082 -5.861673832  
P 1.459141374 -4.567835331 -6.726946354  
C 0.227635816 -3.799374104 -5.508247852  
C 0.220348686 -4.320488930 -4.058136463  
C -0.694037914 -3.458915949 -3.167688131  
C -2.122481823 -3.382653713 -3.725239992  
C -2.112672806 -2.898616314 -5.182741642  
C -1.211505771 -3.789727926 -6.056677341  
H 0.564515531 -2.759146929 -5.498727798  
H 1.232232928 -4.334371567 -3.642578125  
H -0.151059434 -5.353037357 -4.037344933  
H -0.705746770 -3.863011360 -2.148101807  
H -0.279232919 -2.445347071 -3.101268291  
H -2.584969521 -4.379259586 -3.685066462  
H -3.140370846 -2.889684200 -5.577428818  
H -1.733381271 -1.864574194 -5.192059040  
H -1.208774686 -3.465571642 -7.102459908  
H -1.624678493 -4.805743694 -6.043533802  
H -2.741293907 -2.721379757 -3.106731415  
C 0.770547211 -6.316449642 -7.014926910  
C 1.816669226 -7.384268284 -7.403460979  
C 1.174114704 -8.781651497 -7.419856071  
C -0.008064777 -8.832658768 -8.401972771  
C -1.029059649 -7.725283146 -8.097614288  
C -0.358551651 -6.340040207 -8.073393822  
H 0.300764769 -6.614018440 -6.071348190  
H 2.685543537 -7.369369984 -6.743857861  
H 2.185670853 -7.155781269 -8.404981613  
H 1.926548719 -9.533036232 -7.690805435  
H 0.824723303 -9.036117554 -6.407507420  
H 0.374301940 -8.689652443 -9.422595978  
H -1.830031157 -7.727631569 -8.847231865  
H -1.507357001 -7.922832012 -7.125900269  
H -1.108354688 -5.571551323 -7.891781807  
H 0.062098205 -6.129963875 -9.056468010  
H -0.488717318 -9.818578720 -8.374764442  
Pd 1.479409218 -3.247132540 -8.752176285  
Cl 0.474290043 -1.121616840 -7.608330250  
C 1.842571855 -4.763718128 -10.045038223

C 0.894042730 -4.963111401 -11.068594933  
C 2.945383787 -5.629296780 -10.024648666  
C 1.027742863 -5.992836475 -12.003628731  
C 3.094578505 -6.651185036 -10.970702171  
C 2.132451057 -6.847293854 -11.961234093  
H 0.022783404 -4.317653179 -11.132194519  
H 3.699322224 -5.534125328 -9.253181458  
H 0.264691532 -6.125475883 -12.768018723  
H 3.964783430 -7.302487850 -10.918546677  
H 2.242832422 -7.645735741 -12.689979553  
N 1.424754977 -2.073241711 -10.474760056  
H 1.967525005 -2.521317720 -11.211888313  
C 2.683338881 -1.367993236 -4.421085358  
H 2.327696562 -2.396053076 -4.314416885  
C 1.478670239 -0.431663245 -4.199204445  
C 3.715842247 -1.131770611 -3.300520420  
H 4.470193863 -1.918419600 -3.276710749  
H 4.222494602 -0.169808343 -3.439406633  
H 3.219855785 -1.114724636 -2.323025703  
H 1.793304801 0.614663601 -4.114283085  
H 0.979986489 -0.684085846 -3.257344723  
H 0.755338967 -0.499549627 -5.014910698  
C 3.902565241 1.632712364 -8.305070877  
H 4.504249573 1.574674606 -9.222051620  
C 4.517848969 2.722783566 -7.412981987  
C 2.466491938 2.007202864 -8.725422859  
H 2.073019266 1.247672319 -9.409221649  
H 1.826067090 2.055645943 -7.833930969  
H 2.438554525 2.980666876 -9.229557037  
H 3.935842752 2.865599632 -6.495512962  
H 4.547291756 3.683669806 -7.939084530  
H 5.539944172 2.460555792 -7.122632504  
C 5.081644058 -3.265264034 -8.590664864  
H 4.531951904 -4.172280788 -8.329183578  
C 6.561481476 -3.502572536 -8.222487450  
C 4.989587307 -3.067686796 -10.114109039  
H 3.983933210 -2.781919241 -10.423285484  
H 5.694825172 -2.301018953 -10.456483841  
H 5.247558594 -3.999016285 -10.626658440  
H 7.127100468 -2.564352751 -8.251714706  
H 7.017121792 -4.191198349 -8.943354607  
H 6.671131611 -3.942586184 -7.232839584  
H 1.970255256 -1.252020359 -10.201948166  
O -2.864897966 -1.877280354 -9.512542725  
C -3.759683132 -2.894471407 -9.870962143  
O -1.144295454 0.652820289 -10.844438553  
C -0.821078598 1.226445317 -12.079949379  
O -2.411692142 0.961529613 -7.819238186  
C -2.949576139 1.866008759 -6.898343086  
C -3.983888149 -2.891407251 -11.400321007  
C -5.119920254 -2.673461676 -9.169453621  
C -3.199520111 -4.270667076 -9.450181961  
C -1.475755930 2.620599270 -12.196660995  
C -1.337320089 0.330624849 -13.229991913  
C 0.711061060 1.374823570 -12.216950417  
C -4.492053986 1.867109537 -6.993140697  
C -2.532864332 1.470299959 -5.462677479  
C -2.431820631 3.291956425 -7.195114136

|    |              |              |               |    |              |               |               |
|----|--------------|--------------|---------------|----|--------------|---------------|---------------|
| H  | -3.036187410 | -3.069136143 | -11.924489021 | C  | 4.230287552  | -3.556658268  | -5.594497681  |
| H  | -4.696168423 | -3.659955025 | -11.723606110 | C  | 3.365850449  | -4.692922115  | -5.354557991  |
| H  | -4.365537643 | -1.915408134 | -11.726035118 | C  | 3.721340895  | -5.620364666  | -4.343602180  |
| H  | -5.855416775 | -3.449143887 | -9.415525436  | C  | 4.976352215  | -5.504147530  | -3.719420195  |
| H  | -4.985302448 | -2.668291092 | -8.079847336  | C  | 5.821644306  | -4.422023773  | -3.929067612  |
| H  | -5.542275906 | -1.702094913 | -9.457942963  | C  | 5.411224365  | -3.415369034  | -4.827946186  |
| H  | -2.210407257 | -4.432905674 | -9.893297195  | H  | 4.869337082  | -0.872101545  | -9.442763329  |
| H  | -3.084218264 | -4.310739040 | -8.360892296  | H  | 2.127222776  | 0.517393529   | -6.508059978  |
| H  | -3.850046873 | -5.100887299 | -9.751325607  | P  | 1.825571537  | -4.977394581  | -6.419999599  |
| H  | -1.152428508 | 3.252287388  | -11.360164642 | C  | 0.397637129  | -4.268455982  | -5.397680283  |
| H  | -1.221970797 | 3.132217884  | -13.133129120 | C  | 0.389862269  | -4.566919327  | -3.884889364  |
| H  | -2.569322824 | 2.531398296  | -12.145924568 | C  | -0.717647254 | -3.769443750  | -3.170161486  |
| H  | -1.158865452 | 0.768516779  | -14.219589233 | C  | -2.099404335 | -4.034329414  | -3.785965681  |
| H  | -0.836905241 | -0.646184444 | -13.203593254 | C  | -2.081789970 | -3.774451017  | -5.300280094  |
| H  | -2.415674925 | 0.161768228  | -13.118249893 | C  | -0.985299945 | -4.605731487  | -5.990486622  |
| H  | 1.189397454  | 0.402725846  | -12.053901672 | H  | 0.542452395  | -3.195668459  | -5.540806293  |
| H  | 1.010760069  | 1.753879189  | -13.201865196 | H  | 1.361409903  | -4.336668015  | -3.436752796  |
| H  | 1.091700435  | 2.072720289  | -11.460597992 | H  | 0.206572995  | -5.635999680  | -3.719968557  |
| H  | -4.873486042 | 0.849891245  | -6.840388775  | H  | -0.721718967 | -4.021150589  | -2.102537632  |
| H  | -4.963631153 | 2.526365042  | -6.254292488  | H  | -0.492551297 | -2.698607206  | -3.240981102  |
| H  | -4.808147907 | 2.201692343  | -7.990481377  | H  | -2.382718086 | -5.082012177  | -3.609238863  |
| H  | -1.441056013 | 1.392324090  | -5.403467655  | H  | -3.067108631 | -4.014134884  | -5.727684498  |
| H  | -2.872846603 | 2.190062761  | -4.707996368  | H  | -1.894042850 | -2.704590559  | -5.479915619  |
| H  | -2.955683947 | 0.490457177  | -5.200212002  | H  | -0.971958280 | -4.428994656  | -7.070024490  |
| H  | -1.341423273 | 3.332934141  | -7.065586090  | H  | -1.210158706 | -5.669710159  | -5.842620373  |
| H  | -2.663497925 | 3.558325291  | -8.233382225  | H  | -2.861440182 | -3.413892031  | -3.299232006  |
| H  | -2.871916294 | 4.051033974  | -6.537171364  | C  | 1.360010862  | -6.822341919  | -6.564003944  |
| Na | -2.205477715 | -1.242423415 | -7.489118099  | C  | 2.487515926  | -7.870601654  | -6.689216614  |
| Na | -0.823129058 | -1.607296586 | -10.518003464 | C  | 1.898280263  | -9.286691666  | -6.567633629  |
| Na | -0.383350044 | 1.117503762  | -8.812362671  | C  | 0.861591578  | -9.538568497  | -7.675523281  |
| Na | -3.097792625 | 0.340120822  | -9.856734276  | C  | -0.223686591 | -8.449839592  | -7.683382511  |
| C  | 2.341138363  | -6.825232506 | -4.308627129  | C  | 0.391630709  | -7.040699482  | -7.755430698  |
| H  | 2.640268326  | -7.835168362 | -4.603615284  | H  | 0.788716078  | -7.041283131  | -5.652709007  |
| H  | 2.338149548  | -6.813876152 | -3.214605331  | H  | 3.283601284  | -7.716372490  | -5.960628986  |
| H  | 1.326883078  | -6.671054363 | -4.643134594  | H  | 2.952272177  | -7.774028778  | -7.669378281  |
| C  | 6.860291958  | -5.008855343 | -3.566017866  | H  | 2.705057859  | -10.027744293 | -6.629032612  |
| H  | 6.842730999  | -5.872962475 | -2.901425362  | H  | 1.427615643  | -9.412446976  | -5.580649376  |
| H  | 7.701125622  | -5.120954037 | -4.262217999  | H  | 1.378077269  | -9.529842377  | -8.645735741  |
| H  | 7.069214821  | -4.119842529 | -2.961427212  | H  | -0.902800798 | -8.592478752  | -8.533169746  |
| C  | 6.286118507  | -2.615664482 | -5.070642471  | H  | -0.837073445 | -8.535441399  | -6.773266792  |
| H  | 6.391714573  | -2.187412739 | -4.067234516  | H  | -0.399442822 | -6.294250011  | -7.791688919  |
| H  | 7.275007725  | -2.991558313 | -5.351133823  | H  | 0.950715542  | -6.934460163  | -8.687538147  |
| H  | 6.032986641  | -1.804468870 | -5.748181820  | H  | 0.409015268  | -10.531727791 | -7.564072609  |
| O  | 4.825160980  | -6.958310604 | -3.385952711  | Pd | 1.998662233  | -4.023200512  | -8.542497635  |
| C  | 5.440132141  | -8.046437263 | -4.075706005  | Cl | 0.247027680  | -2.036628962  | -7.966058731  |
| H  | 4.829476833  | -8.384291649 | -4.924131870  | C  | 3.214536905  | -5.562668324  | -9.065275192  |
| H  | 6.434685230  | -7.770761490 | -4.451568604  | C  | 2.900350571  | -6.352676392  | -10.178800583 |
| H  | 5.539343834  | -8.861347198 | -3.354487419  | C  | 4.384210587  | -5.878230095  | -8.356441498  |

=====

3F'

=====

|   |             |              |              |   |             |              |               |
|---|-------------|--------------|--------------|---|-------------|--------------|---------------|
| C | 3.920293570 | -2.394142628 | -6.534410954 | H | 2.006885767 | -6.158655643 | -10.757215500 |
| C | 4.639611721 | -2.164147615 | -7.747635365 | H | 4.644738197 | -5.333061218 | -7.461001873  |
| C | 4.334198952 | -1.027675867 | -8.509385109 | H | 3.462481260 | -7.986496925 | -11.459445953 |
| C | 3.420724392 | -0.063958265 | -8.105192184 | H | 6.143252373 | -7.107318878 | -8.210293770  |
| C | 2.806772947 | -0.245347545 | -6.869395733 | H | 5.574105263 | -8.477091789 | -10.221121788 |
| C | 3.028313875 | -1.377460480 | -6.081820965 | C | 2.377150297 | -1.411438823 | -4.695393085  |
|   |             |              |              | H | 2.215948820 | -2.454121113 | -4.416954041  |

C 1.019353628 -0.686508536 -4.627874374  
C 3.316657543 -0.809299052 -3.630134344  
H 4.224410057 -1.400966287 -3.513057232  
H 3.604948759 0.211605877 -3.905866385  
H 2.813508511 -0.769543946 -2.656963110  
H 1.142529130 0.400875717 -4.689558029  
H 0.539097369 -0.889660001 -3.665484905  
H 0.348169208 -0.994927883 -5.433163166  
C 3.194902658 1.189372659 -8.935397148  
H 3.701571703 1.042606831 -9.898976326  
C 3.825550556 2.419343233 -8.254624367  
C 1.708724141 1.434784055 -9.238976479  
H 1.283419967 0.577473342 -9.768916130  
H 1.152252078 1.608669043 -8.306424141  
H 1.581499457 2.320908308 -9.870472908  
H 3.348279238 2.613708258 -7.286644459  
H 3.708375216 3.314944267 -8.875866890  
H 4.894049168 2.263750076 -8.073672295  
C 5.828197479 -2.983492851 -8.269830704  
H 5.935956001 -3.877128363 -7.654259682  
C 7.150302887 -2.184064388 -8.172375679  
C 5.674490929 -3.410930157 -9.748238564  
H 4.690018177 -3.810570955 -9.974554062  
H 5.861040592 -2.561993599 -10.416822433  
H 6.412282467 -4.182181358 -9.992341042  
H 7.112784386 -1.298534274 -8.816311836  
H 7.983370781 -2.806596756 -8.519362450  
H 7.380924225 -1.844698429 -7.164145470  
H 2.865277529 -2.357300043 -10.239398956  
O -0.917388439 -0.349058360 -11.174818039  
C -0.584182262 0.244799227 -12.401620865  
O -2.281418324 -3.309138536 -10.363731384  
C -2.782694340 -4.519580364 -10.858565331  
O -2.990368366 -0.574875176 -8.612721443  
C -3.983011961 0.051698968 -7.851456165  
C 0.897462487 -0.019425750 -12.758124352  
C -0.825778067 1.768095136 -12.324811935  
C -1.465517879 -0.344994694 -13.529355049  
C -2.552111387 -4.607635498 -12.384369850  
C -2.076605797 -5.707095146 -10.163573265  
C -4.301333427 -4.617690563 -10.580526352  
C -5.027054310 -0.989178717 -7.384577274  
C -3.352658987 0.717905998 -6.606485844  
C -4.696610451 1.131591678 -8.695144653  
H 1.090476036 -1.092863321 -12.870044708  
H 1.188174009 0.468241900 -13.696946144  
H 1.551398277 0.356276989 -11.964418411  
H -0.618120551 2.280332804 -13.272212029  
H -1.869853973 1.963097215 -12.048645973  
H -0.183625802 2.209272385 -11.553153038  
H -1.342824936 -1.433923483 -13.573621750  
H -2.526859522 -0.123734348 -13.339694023  
H -1.219722033 0.064972952 -14.516358376  
H -4.554082870 -1.731677413 -6.726303577  
H -5.858720779 -0.538773954 -6.829369545  
H -5.438126087 -1.515995264 -8.254229546  
H -2.651578188 1.507233739 -6.912224293  
H -4.098038673 1.175363302 -5.944249153

H -2.789710522 -0.028135758 -6.032511234  
H -3.960728168 1.849080563 -9.078644753  
H -5.195853233 0.668446898 -9.556747437  
H -5.453629971 1.684824467 -8.125818253  
H -2.940926075 -5.538614273 -12.815437317  
H -3.049633026 -3.767137766 -12.885173798  
H -1.484643698 -4.542952061 -12.616255760  
H -2.292356014 -5.694317341 -9.086441994  
H -2.397297144 -6.680538177 -10.555900574  
H -0.990792751 -5.627943993 -10.279184341  
H -4.494959831 -4.540807724 -9.502216339  
H -4.830941677 -3.792134523 -11.074202538  
H -4.737691402 -5.559230804 -10.936788559  
Na -2.957798481 -1.222774506 -10.792707443  
Na -0.141221419 -2.427992582 -10.678098679  
Na -2.287578583 -2.671363831 -8.247382164  
Na -0.944335639 0.211543933 -9.047446251  
C 2.292956352 -3.562139273 -11.697485924  
C 3.327829838 -3.148895741 -12.572722435  
C 1.321515799 -4.448534012 -12.230491638  
C 3.370481730 -3.581347466 -13.895209312  
C 1.372512579 -4.877805710 -13.554623604  
C 2.396430731 -4.448951244 -14.404191971  
H 4.091941833 -2.473755598 -12.194028854  
H 0.522977531 -4.795841217 -11.577850342  
H 4.178256035 -3.238550425 -14.539057732  
H 0.602651298 -5.553047657 -13.923277855  
H 2.436780930 -4.782552719 -15.437379837  
C 2.848828077 -6.708343029 -8.745235443  
H 1.869464397 -6.777563572 -4.195496082  
H 3.316256285 -7.694042206 -3.805541277  
H 2.712944269 -6.499096870 -2.679024220  
C 7.113852501 -4.304961205 -3.158150196  
H 7.238827229 -5.143340111 -2.473437548  
H 7.977798462 -4.267064571 -3.831789017  
H 7.138132095 -3.383029699 -2.565903902  
C 6.284429550 -2.178592205 -4.881639481  
H 6.380682468 -1.736829519 -3.882924557  
H 7.300784111 -2.427019358 -5.204022408  
H 5.890572548 -1.410905004 -5.542815208  
O 5.334099293 -6.477133751 -2.797080278  
C 6.085242748 -7.548466682 -3.372128010  
H 5.529485703 -8.042366982 -4.181087017  
H 7.042707920 -7.192862988 -3.776066065  
H 6.274791718 -8.266864777 -2.571014881  
N 2.152216196 -3.062247515 -10.418469429

=====  
3G  
=====

C 3.595046043 -2.289065361 -6.966576576  
C 4.391505241 -2.169152975 -8.146035194  
C 4.596083164 -0.905658782 -8.706466675  
C 4.012812614 0.251677603 -8.178127289  
C 3.165490627 0.110083662 -7.076303005  
C 2.950303078 -1.124859095 -6.455137730  
C 3.817085266 -3.482276678 -6.057158947  
C 2.972404957 -4.623878479 -5.997521400

|    |              |              |               |   |              |              |               |
|----|--------------|--------------|---------------|---|--------------|--------------|---------------|
| C  | 3.299700260  | -5.690502167 | -5.127788544  | C | 0.699989319  | -0.619944274 | -5.411203861  |
| C  | 4.483928204  | -5.601337433 | -4.379233837  | C | 2.808651686  | -0.466267705 | -4.012222767  |
| C  | 5.304914951  | -4.471517563 | -4.388741970  | H | 3.785850525  | -0.907758474 | -3.792847395  |
| C  | 4.963058949  | -3.395374775 | -5.229053974  | H | 2.959267616  | 0.597107887  | -4.235792160  |
| H  | 5.235815048  | -0.815822721 | -9.581447601  | H | 2.194371700  | -0.536218345 | -3.107453108  |
| H  | 2.677845478  | 0.986182153  | -6.662958145  | H | 0.719073594  | 0.449988604  | -5.646928787  |
| P  | 1.463006258  | -4.644380093 | -7.090118408  | H | 0.088420421  | -0.745996714 | -4.511005402  |
| C  | -0.034120075 | -4.401637554 | -5.918464661  | H | 0.189044788  | -1.132224441 | -6.228136063  |
| C  | 0.241513863  | -4.433938026 | -4.398746014  | C | 4.272645950  | 1.604894042  | -8.824916840  |
| C  | -0.975418329 | -3.879638195 | -3.634777069  | H | 5.188666344  | 1.504211187  | -9.424455643  |
| C  | -2.238404036 | -4.699525833 | -3.945405006  | C | 4.516207695  | 2.721051931  | -7.793777466  |
| C  | -2.503223896 | -4.747778893 | -5.457652092  | C | 3.124334097  | 1.981843591  | -9.785476685  |
| C  | -1.278019071 | -5.256911278 | -6.241578579  | H | 3.047763586  | 1.276333213  | -10.618758202 |
| H  | -0.297027797 | -3.366507053 | -6.171561241  | H | 2.164051771  | 1.964022994  | -9.260604858  |
| H  | 1.139461398  | -3.863253593 | -4.142966270  | H | 3.275377989  | 2.986279726  | -10.197180748 |
| H  | 0.422011763  | -5.463222027 | -4.067057133  | H | 3.608466625  | 2.954017639  | -7.226461887  |
| H  | -0.766045332 | -3.884382725 | -2.557002783  | H | 4.827588558  | 3.641182423  | -8.299998283  |
| H  | -1.140030146 | -2.832608223 | -3.926576614  | H | 5.298933029  | 2.441075325  | -7.080351830  |
| H  | -2.104152918 | -5.723294735 | -3.561909199  | C | 5.084504128  | -3.383012295 | -8.757230759  |
| H  | -3.366061687 | -5.391377926 | -5.675189018  | H | 4.698902607  | -4.267361641 | -8.246378899  |
| H  | -2.752350092 | -3.741156101 | -5.817759991  | C | 6.608056068  | -3.346655846 | -8.537121773  |
| H  | -1.501634359 | -5.224667072 | -7.310306549  | C | 4.757555962  | -3.533245802 | -10.254422188 |
| H  | -1.077691317 | -6.306208611 | -5.976713181  | H | 3.677357674  | -3.505719185 | -10.419285774 |
| H  | -3.105649710 | -4.277831078 | -3.422404051  | H | 5.209061146  | -2.731276989 | -10.849188805 |
| C  | 1.557951927  | -6.344326973 | -7.939517021  | H | 5.145500660  | -4.485051155 | -10.634399414 |
| C  | 2.793588161  | -6.292992115 | -8.868436813  | H | 7.048505783  | -2.446659327 | -8.980999947  |
| C  | 3.011618614  | -7.613433361 | -9.624361992  | H | 7.082377434  | -4.217780590 | -9.003517151  |
| C  | 1.756728530  | -8.013936043 | -10.411020279 | H | 6.857383728  | -3.355152130 | -7.473104954  |
| C  | 0.553211629  | -8.119480133 | -9.466068268  | H | 2.356237411  | -0.799930155 | -9.879678726  |
| C  | 0.299636483  | -6.799739838 | -8.713642120  | O | -4.398867130 | 1.216409445  | -8.788554192  |
| H  | 1.749751449  | -7.098741531 | -7.177087307  | C | -5.757557869 | 1.538692832  | -8.830931664  |
| H  | 3.687901020  | -6.056990147 | -8.281618118  | O | -1.864489794 | 0.354575306  | -10.714085579 |
| H  | 2.658804417  | -5.480388165 | -9.590789795  | C | -1.548142791 | 0.286433399  | -12.076167107 |
| H  | 3.876216888  | -7.511269093 | -10.292655945 | O | -1.327198863 | 2.321735144  | -8.068743706  |
| H  | 3.260362387  | -8.410310745 | -8.907314301  | C | -0.697434902 | 3.508774519  | -7.686179638  |
| H  | 1.547529817  | -7.251241684 | -11.174514771 | C | -6.128853798 | 2.103531599  | -10.222043991 |
| H  | -0.351703227 | -8.390599251 | -10.023468018 | C | -6.084747791 | 2.604867220  | -7.759600163  |
| H  | 0.732935309  | -8.929232597 | -8.742326736  | C | -6.610713005 | 0.279053003  | -8.558503151  |
| H  | -0.534400284 | -6.947047710 | -8.027007103  | C | -0.197486699 | 0.990850449  | -12.348781586 |
| H  | -0.003861724 | -6.036661625 | -9.430143356  | C | -2.645137548 | 0.992269993  | -12.911038399 |
| H  | 1.918681026  | -8.961904526 | -10.939049721 | C | -1.457954526 | -1.184706688 | -12.531660080 |
| Pd | 1.538519144  | -2.774482965 | -8.528664589  | C | -1.700636506 | 4.443628788  | -6.968533039  |
| Cl | -2.354038954 | -1.242935300 | -7.096154213  | C | 0.471970707  | 3.207559824  | -6.723277092  |
| C  | 0.177011877  | -3.536530495 | -9.795598984  | C | -0.145426571 | 4.243144035  | -8.932424545  |
| C  | -1.181488037 | -3.570388794 | -9.448602676  | H | -5.843776703 | 1.386181951  | -11.000905037 |
| C  | 0.568165183  | -4.053730011 | -11.039982796 | H | -7.200303078 | 2.316184521  | -10.322816849 |
| C  | -2.119716644 | -4.150795937 | -10.310241699 | H | -5.584085941 | 3.039349318  | -10.409122467 |
| C  | -0.375461638 | -4.631323338 | -11.899720192 | H | -7.130875587 | 2.933414221  | -7.789279461  |
| C  | -1.722776413 | -4.689701557 | -11.537674904 | H | -5.890767097 | 2.202484608  | -6.755890846  |
| H  | -1.513017654 | -3.149142981 | -8.506655693  | H | -5.443846703 | 3.483131886  | -7.905956745  |
| H  | 1.610233545  | -4.025901318 | -11.345770836 | H | -6.449807167 | -0.464043051 | -9.351960182  |
| H  | -3.165765285 | -4.195203304 | -10.008340836 | H | -6.307635307 | -0.170808166 | -7.606408596  |
| H  | -0.051751826 | -5.032761097 | -12.857499123 | H | -7.685810089 | 0.493336916  | -8.518021584  |
| H  | -2.451833487 | -5.143632412 | -12.203316689 | H | 0.606648922  | 0.497547209  | -11.793059349 |
| N  | 1.391222835  | -1.051946759 | -9.666056633  | H | 0.067761160  | 0.991350830  | -13.413626671 |
| H  | 0.982666671  | -1.290961027 | -10.570237160 | H | -0.244275451 | 2.033508062  | -12.007445335 |
| C  | 2.110228539  | -1.182003856 | -5.184794903  | H | -2.469794512 | 0.917321026  | -13.991520882 |
| H  | 2.005154610  | -2.233705759 | -4.907556057  | H | -3.624395609 | 0.550205231  | -12.690093994 |

H -2.693757296 2.062453032 -12.660586357  
H -2.434430361 -1.675035834 -12.428417206  
H -1.142529368 -1.285123825 -13.578090668  
H -0.754787862 -1.734922051 -11.901681900  
H -2.071100950 3.968214750 -6.049600124  
H -1.257921815 5.407430172 -6.687919140  
H -2.563077927 4.639792919 -7.618113041  
H 1.200442076 2.557176590 -7.218554497  
H 0.993689716 4.114329815 -6.391685486  
H 0.096463911 2.681365967 -5.838087559  
H 0.512825549 3.575123072 -9.497381210  
H -0.970607996 4.541472435 -9.595067978  
H 0.416323394 5.150720119 -8.678586006  
Na -3.005063057 1.274444342 -7.018465996  
Na -3.420344591 -0.708168328 -9.543004036  
Na -0.380630583 0.329416096 -8.906382561  
Na -2.697114706 2.210480452 -9.842706680  
C 2.465884924 -6.934100151 -4.896461487  
H 2.874705076 -7.798985481 -5.433150768  
H 2.477528095 -7.190165520 -3.834303617  
H 1.430716157 -6.811999321 -5.206363201  
C 6.526283741 -4.415073395 -3.503195524  
H 6.557187080 -5.270973206 -2.828567266  
H 7.449856758 -4.405338287 -4.096231461  
H 6.532921314 -3.502903223 -2.896592379  
C 5.863350868 -2.175343037 -5.195504189  
H 5.860442162 -1.720862031 -4.197408199  
H 6.903505802 -2.449638605 -5.404170990  
H 5.573367596 -1.406239867 -5.907645226  
O 4.814896107 -6.665537357 -3.552550554  
C 5.665205956 -7.630399227 -4.174055099  
H 5.201570034 -8.057874680 -5.073103428  
H 6.631403923 -7.189757347 -4.455006599  
H 5.829370499 -8.423958778 -3.441104412

=====  
3G'  
=====

C 3.712561846 -2.308288574 -6.962139606  
C 4.505153179 -2.134724617 -8.137992859  
C 4.739859581 -0.847390056 -8.624189377  
C 4.190464497 0.292687595 -8.031708717  
C 3.347856760 0.109516136 -6.928812504  
C 3.116526127 -1.153801084 -6.368546009  
C 3.933802128 -3.558019400 -6.124111176  
C 3.093801975 -4.704341412 -6.118898869  
C 3.419310808 -5.810717106 -5.300487041  
C 4.602974892 -5.757198334 -4.549971581  
C 5.424263954 -4.628054619 -4.507621288  
C 5.083207607 -3.513832808 -5.295903206  
H 5.391445637 -0.725843787 -9.485280991  
H 2.892355680 0.976358116 -6.460930347  
P 1.593353510 -4.708420753 -7.216454506  
C 0.069689490 -4.648007393 -6.052447319  
C 0.408575028 -4.472306252 -4.555306911  
C -0.859786272 -4.124408245 -3.756851435  
C -1.923464775 -5.218781948 -3.919518471  
C -2.259860039 -5.425780296 -5.401954651

C -1.007240057 -5.735281467 -6.245006561  
H -0.386905938 -3.706983089 -6.375281334  
H 1.156305552 -3.689558268 -4.418565273  
H 0.841525376 -5.392077446 -4.148401260  
H -0.598473191 -3.992820024 -2.698975563  
H -1.265363693 -3.170882463 -4.117928505  
H -1.546486497 -6.160149097 -3.490640640  
H -2.984608173 -6.241126060 -5.523537636  
H -2.725858450 -4.512441158 -5.791390896  
H -1.300891876 -5.787625790 -7.295182228  
H -0.608153343 -6.720151424 -5.961650372  
H -2.829810381 -4.956972122 -3.360132933  
C 1.805448890 -6.340408325 -8.179666519  
C 2.988325834 -6.129327297 -9.149252892  
C 3.302344084 -7.385027885 -9.976236343  
C 2.059832096 -7.872078896 -10.730191231  
C 0.921786487 -8.147867203 -9.741336823  
C 0.565995395 -6.900174618 -8.911645889  
H 2.116362810 -7.094718933 -7.455904007  
H 3.876957417 -5.844311237 -8.579450607  
H 2.756737947 -5.300094604 -9.824678421  
H 4.122423172 -7.164645672 -10.671329498  
H 3.660130978 -8.184082031 -9.309519768  
H 1.739554882 -7.097676277 -11.441500664  
H 0.023913233 -8.489830971 -10.270157814  
H 1.220807791 -8.965146065 -9.067245483  
H -0.202920690 -7.177456856 -8.191618919  
H 0.136296168 -6.144934177 -9.569738388  
H 2.290492535 -8.770718575 -11.315523148  
Pd 1.573167086 -2.737557888 -8.502920151  
Cl -2.440603256 -1.777736306 -6.441187859  
C 0.155788958 -3.559218884 -9.662716866  
C -1.160078287 -3.738651752 -9.218620300  
C 0.513137817 -3.991612196 -10.947646141  
C -2.097387314 -4.369776249 -10.045908928  
C -0.429504275 -4.622017860 -11.766472816  
C -1.737432003 -4.820569038 -11.317226410  
H -1.470213771 -3.387211800 -8.240385056  
H 1.516712546 -3.826353073 -11.327316284  
H -3.116768837 -4.505188942 -9.688652992  
H -0.137439966 -4.952642918 -12.760611534  
H -2.469452858 -5.306036472 -11.956458092  
N 1.303114772 -0.875044286 -9.509222031  
H 2.083649874 -0.376706243 -9.081456184  
C 2.305390358 -1.257812500 -5.082610130  
H 2.386058569 -2.290769577 -4.736593246  
C 0.818168938 -0.950844407 -5.326889038  
C 2.871773720 -0.366031826 -3.962264299  
H 3.929442406 -0.575653851 -3.774801016  
H 2.777654886 0.697609127 -4.206819534  
H 2.320082426 -0.538885295 -3.031676292  
H 0.673952997 0.088384666 -5.636083603  
H 0.232676655 -1.116609454 -4.416325569  
H 0.390690953 -1.582073212 -6.108333588  
C 4.533967972 1.675992012 -8.567081451  
H 5.258119583 1.533801913 -9.380421638  
C 5.209638119 2.536361694 -7.483093262  
C 3.308370352 2.398573399 -9.154005051

H 2.839730024 1.817826390 -9.953310966  
H 2.556681395 2.579543114 -8.382480621  
H 3.600204229 3.370308638 -9.567865372  
H 4.520598412 2.735927105 -6.654916763  
H 5.520228863 3.502090693 -7.896667480  
H 6.094048500 2.038317204 -7.072258949  
C 5.183660507 -3.309862375 -8.828661919  
H 4.798094273 -4.219751358 -8.369383812  
C 6.708455086 -3.299449444 -8.612025261  
C 4.841457844 -3.354693651 -10.329561234  
H 3.763337612 -3.273246765 -10.491190910  
H 5.315266132 -2.533248663 -10.877821922  
H 5.191868305 -4.294552803 -10.770856857  
H 7.158725739 -2.381644011 -9.006574631  
H 7.171971798 -4.148401737 -9.127449989  
H 6.959682941 -3.369789600 -7.550220966  
O -4.851044655 0.731232047 -7.568680286  
C -6.152147293 1.030035377 -7.153686047  
O -3.001585722 -0.321011096 -10.141320229  
C -3.495722055 -0.340365946 -11.455229759  
O -1.672805786 1.725521684 -7.842074394  
C -0.897100210 2.887662411 -7.765693188  
C -6.979689121 1.562191725 -8.345976830  
C -6.122473240 2.109482527 -6.047872066  
C -6.835463047 -0.239394665 -6.597042084  
C -2.773704052 0.729596317 -12.308320999  
C -5.016077518 -0.030145362 -11.477746010  
C -3.293870687 -1.726838350 -12.100256920  
C -1.761125088 4.082417965 -7.300119877  
C 0.252924740 2.684753418 -6.755890846  
C -0.295840770 3.218889475 -9.152492523  
H -6.970269203 0.827529788 -9.158743858  
H -8.022933960 1.771738529 -8.079326630  
H -6.536423683 2.492502928 -8.726526260  
H -7.124940395 2.420140743 -5.729167461  
H -5.595913410 1.729068756 -5.161409855  
H -5.586643219 2.994168043 -6.412697792  
H -6.932094574 -0.993278682 -7.390727520  
H -6.223664284 -0.667515457 -5.794715405  
H -7.840318680 -0.043483242 -6.203295708  
H -1.694107652 0.563116670 -12.288638115  
H -3.106867790 0.729191065 -13.353740692  
H -2.962995052 1.734610796 -11.902989388  
H -5.427058220 -0.039811980 -12.494593620  
H -5.573104382 -0.771933198 -10.888888359  
H -5.231799126 0.955995440 -11.045315742  
H -3.814403772 -2.492169857 -11.513416290  
H -3.677528381 -1.764230251 -13.127525330  
H -2.238939524 -2.005301714 -12.117228508  
H -2.208077192 3.868942261 -6.320562363  
H -1.185329795 5.011914253 -7.214817047  
H -2.581637859 4.259850502 -8.008235931  
H 0.850544214 1.820872188 -7.060857773  
H 0.913259804 3.558176041 -6.679327011  
H -0.153355747 2.476585150 -5.757865429  
H 0.323331028 2.387949228 -9.508150101  
H -1.097240806 3.372997046 -9.886704445  
H 0.327272087 4.121408939 -9.138697624

Na -2.983864069 0.783410192 -6.302436352  
Na -4.111231327 -1.249727011 -8.435759544  
Na -0.960218430 -0.163402244 -8.978965759  
Na -3.519168139 1.608593225 -9.106003761  
C 2.575529814 -7.056508541 -5.114059925  
H 3.019267321 -7.923683167 -5.617658138  
H 2.527844191 -7.308882236 -4.051482201  
H 1.558439493 -6.942814350 -5.481509209  
C 6.636054039 -4.609615326 -3.606859684  
H 6.639156818 -5.475620747 -2.944332600  
H 7.567831516 -4.613154411 -4.186906338  
H 6.653908253 -3.706867695 -2.987046719  
C 5.973329544 -2.290352345 -5.188909054  
H 5.873968601 -1.831375837 -4.197164536  
H 7.028359890 -2.560834169 -5.301512241  
H 5.748215199 -1.525433064 -5.927709103  
O 4.924467564 -6.857030869 -3.768868685  
C 5.802588940 -7.781180382 -4.413103580  
H 5.370996952 -8.161457062 -5.348657608  
H 6.773900509 -7.320576668 -4.638166904  
H 5.949048996 -8.611860275 -3.718805790  
C 1.473131180 -0.819491982 -10.902279854  
C 0.379382670 -1.083892584 -11.753407478  
C 2.692551851 -0.459591061 -11.517466545  
C 0.497468054 -0.997962832 -13.137034416  
C 2.803485632 -0.360599011 -12.903956413  
C 1.710652471 -0.635075271 -13.729220390  
H -0.568842888 -1.359780431 -11.307038307  
H 3.556119442 -0.261419833 -10.892114639  
H -0.371729314 -1.210484385 -13.754996300  
H 3.756560564 -0.071350351 -13.342088699  
H 1.799838185 -0.561072171 -14.809339523

=====  
3H  
=====

C 1.908318162 4.576763153 4.697116375  
C 3.050063610 5.388508797 4.979508877  
C 2.862316370 6.692159653 5.434703350  
C 1.589738131 7.252897739 5.585230827  
C 0.484343022 6.463288307 5.275574684  
C 0.610784650 5.145493031 4.834558964  
C 2.063453913 3.068539381 4.721896648  
C 2.203717709 2.249976873 3.570004225  
C 2.325016022 0.847328067 3.721494436  
C 2.337602377 0.311879516 5.018548965  
C 2.235924244 1.102929711 6.166300774  
C 2.067274809 2.490868568 6.015748978  
H 3.735067368 7.299041271 5.658514500  
H -0.508035362 6.897202492 5.364684582  
P 2.155864239 3.107632875 1.915460706  
C 0.726439178 2.308626890 0.953957856  
C 0.151335895 3.306152821 -0.072348319  
C -0.929390788 2.647109747 -0.944308937  
C -2.054314137 2.047208548 -0.088098936  
C -1.488134980 1.072873712 0.955787301  
C -0.412121564 1.744794488 1.826112032  
H 1.165323973 1.472358704 0.392285138













|    |              |              |              |   |              |              |              |
|----|--------------|--------------|--------------|---|--------------|--------------|--------------|
| C  | 2.482159615  | 2.088296652  | 3.535125971  | H | -0.526659250 | 3.999627113  | 6.373147011  |
| C  | 2.517054081  | 0.706823587  | 3.853519917  | H | -1.376400590 | 5.438373566  | 5.791345119  |
| C  | 2.460560322  | 0.316900998  | 5.201049328  | H | -1.995087504 | 3.827374458  | 5.395079136  |
| C  | 2.396667480  | 1.234940767  | 6.251728058  | H | -1.426635146 | 5.918087482  | 3.205547810  |
| C  | 2.341333151  | 2.605932236  | 5.943902969  | H | -1.913417816 | 4.258234024  | 2.856447697  |
| H  | 4.292348385  | 7.301143169  | 4.781279087  | H | -0.427533239 | 4.920234203  | 2.134070158  |
| H  | 0.025973219  | 7.057662964  | 4.557064533  | C | 4.886825562  | 4.682755947  | 4.548702717  |
| P  | 2.557085752  | 2.730379820  | 1.763213515  | H | 4.768196583  | 3.643898487  | 4.231785774  |
| C  | 1.120880961  | 1.883307338  | 0.832178414  | C | 5.504134655  | 4.671305656  | 5.959694862  |
| C  | 0.652366042  | 2.784064054  | -0.335038364 | C | 5.837203979  | 5.364478588  | 3.547626972  |
| C  | -0.457414120 | 2.108984709  | -1.157954335 | H | 5.384918690  | 5.408603668  | 2.553338051  |
| C  | -1.652808785 | 1.727999568  | -0.272139668 | H | 6.085674286  | 6.388765335  | 3.846791506  |
| C  | -1.203095913 | 0.846728325  | 0.902767062  | H | 6.778182507  | 4.806315422  | 3.479132414  |
| C  | -0.087013118 | 1.521554589  | 1.718612909  | H | 5.607291698  | 5.690975666  | 6.349346161  |
| H  | 1.517292857  | 0.956066847  | 0.392806947  | H | 6.501450062  | 4.216643810  | 5.939575672  |
| H  | 1.495741725  | 3.051939964  | -0.978811204 | H | 4.889057159  | 4.103370667  | 6.662242889  |
| H  | 0.285549283  | 3.732054949  | 0.078704357  | C | 2.073091507  | 8.865228653  | 4.935165882  |
| H  | -0.777255952 | 2.777592659  | -1.966926813 | H | 3.086021423  | 9.267338753  | 4.793890953  |
| H  | -0.058380082 | 1.202876091  | -1.638226032 | C | 1.662639618  | 9.150915146  | 6.393227577  |
| H  | -2.111036062 | 2.646068573  | 0.123875394  | C | 1.139439464  | 9.599416733  | 3.956397295  |
| H  | -2.053339720 | 0.615696430  | 1.557416201  | H | 1.412943721  | 9.425136566  | 2.910754204  |
| H  | -0.835025311 | -0.115111835 | 0.515435457  | H | 0.098389521  | 9.280057907  | 4.077186584  |
| H  | 0.209709913  | 0.875540674  | 2.549749851  | H | 1.171408176  | 10.679827690 | 4.135753155  |
| H  | -0.480414718 | 2.440721035  | 2.165170670  | H | 0.656690955  | 8.763264656  | 6.591321945  |
| H  | -2.424916744 | 1.217971444  | -0.861683965 | H | 1.658485651  | 10.227802277 | 6.597514629  |
| C  | 4.066429615  | 1.853950381  | 1.026520610  | H | 2.350652218  | 8.668760300  | 7.095134735  |
| C  | 5.308163643  | 2.050623894  | 1.915121436  | C | 2.652248859  | -0.409874350 | 2.838662624  |
| C  | 6.556077957  | 1.391000867  | 1.305945873  | H | 3.709408760  | -0.657086253 | 2.684133768  |
| C  | 6.823017597  | 1.912337303  | -0.113958992 | H | 2.171812534  | -1.322271705 | 3.191554546  |
| C  | 5.591335297  | 1.710500121  | -1.009120941 | H | 2.223118305  | -0.158956781 | 1.873115897  |
| C  | 4.339844227  | 2.369033813  | -0.402354151 | C | 2.396647930  | 0.754219830  | 7.683648109  |
| H  | 3.858934402  | 0.781892240  | 0.953004897  | H | 1.420321822  | 0.907101631  | 8.161845207  |
| H  | 5.124691963  | 1.650389433  | 2.918935061  | H | 2.645562172  | -0.306040466 | 7.738073349  |
| H  | 5.487358570  | 3.126578569  | 2.026662350  | H | 3.128535032  | 1.304118872  | 8.284502029  |
| H  | 7.424739838  | 1.570966959  | 1.951930523  | C | 2.212323904  | 3.569386005  | 7.110163212  |
| H  | 6.412086010  | 0.300749809  | 1.270563483  | H | 1.330391169  | 3.326447964  | 7.715361595  |
| H  | 7.058907032  | 2.985518456  | -0.063071720 | H | 3.075256348  | 3.497379541  | 7.782795906  |
| H  | 5.774475574  | 2.116281748  | -2.012155771 | H | 2.127087831  | 4.606695175  | 6.796643257  |
| H  | 5.411141872  | 0.632526815  | -1.135756969 | O | 2.500355244  | -1.040941358 | 5.496539593  |
| H  | 3.475438833  | 2.179150581  | -1.048770428 | C | 1.209641933  | -1.618151426 | 5.696982861  |
| H  | 4.468626499  | 3.459314585  | -0.364070952 | H | 0.686378002  | -1.159007072 | 6.546032906  |
| H  | 7.699756145  | 1.415805101  | -0.548380613 | H | 0.579529524  | -1.510383844 | 4.802855492  |
| Pd | 2.620337248  | 4.956263542  | 1.576002479  | H | 1.367568731  | -2.679811478 | 5.902611256  |
| C  | 1.659843326  | 7.635243893  | 0.415530324  | N | 2.691577435  | 7.227204323  | 1.329895258  |
| C  | 1.925024748  | 7.990667820  | -0.911951959 | H | 2.401950121  | 7.416976452  | 2.290530682  |
| C  | 0.337640673  | 7.644860744  | 0.885257244  | C | 4.030030727  | 7.718179226  | 1.123818398  |
| C  | 0.868031919  | 8.329391479  | -1.759256721 | C | 4.882086277  | 7.067861080  | 0.225188717  |
| C  | -0.705504835 | 7.987075329  | 0.029736526  | C | 4.492624283  | 8.821875572  | 1.844423532  |
| C  | -0.450599670 | 8.327644348  | -1.302139759 | C | 6.187826633  | 7.522361755  | 0.051023010  |
| H  | 2.943636179  | 8.000736237  | -1.281669497 | C | 5.808842182  | 9.258762360  | 1.684003830  |
| H  | 0.140721068  | 7.359246731  | 1.913304567  | C | 6.658755302  | 8.613867760  | 0.785303891  |
| H  | 1.085091233  | 8.598742485  | -2.789767027 | H | 4.513903141  | 6.189929008  | -0.297835648 |
| H  | -1.724586487 | 7.985527515  | 0.407834202  | H | 3.824991465  | 9.331482887  | 2.532654047  |
| H  | -1.265284061 | 8.591045380  | -1.969901919 | H | 6.845395088  | 7.008105278  | -0.644514263 |
| C  | -0.232469082 | 4.399741173  | 4.242998123  | H | 6.166202068  | 10.109029770 | 2.258612156  |
| H  | 0.039110575  | 3.359611273  | 4.046071529  | H | 7.682173252  | 8.955992699  | 0.659767926  |
| C  | -1.046006441 | 4.904016972  | 3.036764145  |   |              |              |              |
| C  | -1.080302596 | 4.416556358  | 5.527045727  |   |              |              |              |

3J

=====  
C 0.890674949 -4.417181969 -3.120645285  
C 0.286209583 -3.142488718 -3.010508299  
C -1.009166837 -3.060089111 -2.488129139  
C -1.719595075 -4.188168049 -2.072033882  
C -1.111490250 -5.438762188 -2.218376160  
C 0.177192360 -5.579190731 -2.744287491  
C 2.360767841 -4.505101204 -3.415826559  
C 2.928139448 -4.695021629 -4.705659866  
C 4.341311932 -4.750948429 -4.829375744  
C 5.131040573 -4.519928932 -3.693270683  
C 4.594111919 -4.360172272 -2.417731762  
C 3.196653605 -4.381130695 -2.276854992  
H -1.480831623 -2.085205555 -2.397307396  
H -1.656636953 -6.327666759 -1.913863540  
P 1.971169829 -4.767243385 -6.326948166  
C 0.220392302 -4.021681786 -6.269052505  
C -0.926986516 -4.982192993 -5.889499664  
C -2.266753435 -4.229630947 -5.797756672  
C -2.610773563 -3.537199736 -7.121690273  
C -1.475709796 -2.593836784 -7.540669918  
C -0.119346499 -3.316354036 -7.606330395  
H 0.304069668 -3.251149416 -5.503979683  
H -0.727965534 -5.469257832 -4.939176559  
H -1.025003433 -5.765335560 -6.649697304  
H -3.054108858 -4.937900066 -5.511934757  
H -2.203734636 -3.488071203 -4.991913795  
H -2.757707357 -4.298308849 -7.902386665  
H -1.687225223 -2.142245293 -8.517727852  
H -1.406333447 -1.765042901 -6.824089050  
H 0.666196525 -2.595504045 -7.857170105  
H -0.146221578 -4.057880402 -8.413752556  
H -3.555279970 -2.986220598 -7.036263466  
C 1.679259658 -6.602225304 -6.643414021  
C 2.884048462 -7.539434910 -6.425498962  
C 2.425713539 -9.009078026 -6.457648277  
C 1.707370400 -9.346752167 -7.773200035  
C 0.539910495 -8.381423950 -8.029176712  
C 1.020071983 -6.919775486 -8.002887726  
H 0.953926861 -6.831327438 -5.851608276  
H 3.384116888 -7.322340965 -5.476314545  
H 3.613191605 -7.382632732 -7.229002476  
H 3.292192936 -9.665779114 -6.313477516  
H 1.747260809 -9.193541527 -5.612974167  
H 2.422806978 -9.265326500 -8.604043961  
H 0.072385132 -8.595612526 -8.997668266  
H -0.235568777 -8.529212952 -7.263014793  
H 0.186897203 -6.246470928 -8.217579842  
H 1.751687050 -6.767859459 -8.798687935  
H 1.353573561 -10.384731293 -7.759749413  
Pd 3.086747885 -3.344902515 -7.737842083  
Cl 3.398115396 -1.504769206 -6.211426735  
C 3.016737700 -4.608789921 -9.284365654  
C 2.024464846 -4.440219879 -10.265143394  
C 4.030278206 -5.554876804 -9.509676933  
C 2.054780960 -5.190921783 -11.444055557  
C 4.059122562 -6.302694321 -10.690978050

C 3.064203978 -6.132090569 -11.655089378  
H 1.224776268 -3.720269442 -10.119783401  
H 4.817022324 -5.707480431 -8.777635574  
H 1.280388117 -5.046400070 -12.193828583  
H 4.856265068 -7.025081158 -10.851124763  
H 3.077819109 -6.724902630 -12.565809250  
C 0.786870360 -6.975520134 -2.887791157  
H 1.638717175 -6.897009850 -3.571314812  
C -0.197561115 -7.998846531 -3.486381292  
C 1.329639912 -7.498789787 -1.544676781  
H 2.130391121 -6.862030506 -1.165230155  
H 0.533460736 -7.530168533 -0.792086184  
H 1.729447722 -8.512881279 -1.658685684  
H -1.017592907 -8.224769592 -2.796639919  
H 0.320087403 -8.942276001 -3.691168785  
H -0.641645074 -7.647614479 -4.422657490  
C -3.114213943 -4.055120468 -1.478583574  
H -3.371712923 -2.987597227 -1.487229824  
C -3.146538258 -4.532092571 -0.014497534  
C -4.167228699 -4.793447018 -2.325415373  
H -4.163895130 -4.433592319 -3.358917236  
H -3.971917152 -5.871728897 -2.346822977  
H -5.171451092 -4.645395279 -1.912610888  
H -2.910012007 -5.599958420 0.056110445  
H -4.139875889 -4.380641937 0.422668189  
H -2.416915178 -3.988036394 0.593869507  
C 1.019710541 -1.871149898 -3.442934275  
H 1.789412141 -2.148020744 -4.169253349  
C 1.744973063 -1.184450388 -2.269181252  
C 0.097675681 -0.849505544 -4.134462357  
H -0.549562931 -1.318231344 -4.881327152  
H -0.547295690 -0.327212691 -3.418029070  
H 0.709575534 -0.100573048 -4.645973682  
H 1.048314214 -0.965315104 -1.451046824  
H 2.186255693 -0.240694672 -2.607355595  
H 2.552314758 -1.804698348 -1.878259659  
C 2.646207809 -4.244226933 -0.868179739  
H 2.980799437 -5.080176830 -0.242736131  
H 3.017711401 -3.333389759 -0.386288673  
H 1.559427500 -4.217926025 -0.832828104  
C 5.507198811 -4.173678875 -1.231164694  
H 6.548927307 -4.308797836 -1.523136973  
H 5.394330025 -3.172236681 -0.797323942  
H 5.277544022 -4.890489578 -0.435143083  
C 5.113999844 -5.043013573 -6.093420029  
H 6.028564453 -5.585611343 -5.843435764  
H 4.549056053 -5.638431072 -6.800372124  
H 5.408388138 -4.116477489 -6.601368427  
O 6.505649090 -4.480172634 -3.851811171  
C 6.993206024 -3.169042587 -4.174303055  
H 6.428366661 -2.721148491 -5.000311375  
H 6.922907829 -2.503099442 -3.304235458  
H 8.041323662 -3.286298513 -4.459130764

=====  
3K  
=====  
C 0.907950819 -4.368259430 -3.213380337

|    |              |               |               |   |              |              |               |
|----|--------------|---------------|---------------|---|--------------|--------------|---------------|
| C  | 0.291307449  | -3.094495296  | -3.171280861  | H | 1.358514071  | -5.918850422 | -12.189670563 |
| C  | -1.003458261 | -2.993063688  | -2.650957584  | H | 4.973655224  | -7.641200542 | -10.620802879 |
| C  | -1.703197479 | -4.098804474  | -2.164915085  | H | 3.153159857  | -7.637960911 | -12.318386078 |
| C  | -1.080594420 | -5.347622395  | -2.228614807  | N | 4.157196999  | -2.276113749 | -9.492508888  |
| C  | 0.206797004  | -5.508387089  | -2.751420498  | H | 5.142548084  | -2.511085510 | -9.578147888  |
| C  | 2.382497549  | -4.462750435  | -3.496844292  | H | 3.730424166  | -2.334603548 | -10.413395882 |
| C  | 2.969901800  | -4.659487247  | -4.776898384  | C | 0.809920311  | -6.913094044 | -2.813870430  |
| C  | 4.387744427  | -4.708326340  | -4.873077393  | H | 1.697716475  | -6.864679813 | -3.452219963  |
| C  | 5.157239914  | -4.474363327  | -3.723653316  | C | -0.159732863 | -7.943630695 | -3.426053047  |
| C  | 4.597450733  | -4.295101166  | -2.459847927  | C | 1.270798922  | -7.401125431 | -1.427618623  |
| C  | 3.198992968  | -4.303559303  | -2.345564127  | H | 2.024680376  | -6.738929272 | -0.999666274  |
| H  | -1.483285069 | -2.018634081  | -2.616179705  | H | 0.424179345  | -7.439931393 | -0.732091904  |
| H  | -1.612213373 | -6.220587254  | -1.859998345  | H | 1.698719859  | -8.407938004 | -1.495089650  |
| P  | 2.048805237  | -4.841015339  | -6.417093277  | H | -1.023058414 | -8.119635582 | -2.775435448  |
| C  | 0.294886887  | -4.098687172  | -6.406829357  | H | 0.345763654  | -8.905948639 | -3.560779572  |
| C  | -0.861963570 | -5.013209343  | -5.951683521  | H | -0.542965889 | -7.623635292 | -4.399254799  |
| C  | -2.198910713 | -4.250234604  | -5.933966637  | C | -3.101452351 | -3.941528320 | -1.585334420  |
| C  | -2.530924559 | -3.670814514  | -7.313992500  | H | -3.369096279 | -2.879245996 | -1.664097786  |
| C  | -1.388097763 | -2.770729542  | -7.802115917  | C | -3.138611317 | -4.322653294 | -0.093543880  |
| C  | -0.034587041 | -3.501833439  | -7.799229622  | C | -4.143234253 | -4.742818356 | -2.387468100  |
| H  | 0.381323695  | -3.264362097  | -5.711400986  | H | -4.132156372 | -4.456001759 | -3.443581104  |
| H  | -0.672341883 | -5.416711330  | -4.961373329  | H | -3.941736698 | -5.818742275 | -2.331693649  |
| H  | -0.961318851 | -5.861043453  | -6.639062405  | H | -5.152074337 | -4.572196960 | -1.994582891  |
| H  | -2.992953539 | -4.927041531  | -5.594479561  | H | -2.894781828 | -5.381921768 | 0.047464307   |
| H  | -2.138897181 | -3.442390919  | -5.193892479  | H | -4.135490417 | -4.150623322 | 0.327914774   |
| H  | -2.673929691 | -4.495153904  | -8.028568268  | H | -2.416416407 | -3.734549522 | 0.481906176   |
| H  | -1.594212770 | -2.397845030  | -8.813408852  | C | 1.011439204  | -1.835282087 | -3.655597687  |
| H  | -1.318254352 | -1.887166142  | -7.153192520  | H | 1.779757619  | -2.131034613 | -4.374638557  |
| H  | 0.756189823  | -2.807404995  | -8.100369453  | C | 1.732349873  | -1.104015589 | -2.506256580  |
| H  | -0.056957427 | -4.305452824  | -8.546447754  | C | 0.079636909  | -0.846898615 | -4.380611420  |
| H  | -3.474376202 | -3.111687422  | -7.283584118  | H | -0.556845486 | -1.346781969 | -5.116780758  |
| C  | 1.755807042  | -6.700078011  | -6.551667213  | H | -0.574675083 | -0.309875727 | -3.683618069  |
| C  | 2.979657412  | -7.598171234  | -6.279303551  | H | 0.684400678  | -0.106765367 | -4.912804127  |
| C  | 2.552497149  | -9.074502945  | -6.189790726  | H | 1.032539487  | -0.858975768 | -1.698101163  |
| C  | 1.818773031  | -9.529355049  | -7.460975170  | H | 2.167674303  | -0.169345036 | -2.876149178  |
| C  | 0.632103205  | -8.605577469  | -7.776692867  | H | 2.542048693  | -1.705791473 | -2.092161417  |
| C  | 1.088688970  | -7.139882565  | -7.873164177  | C | 2.626577854  | -4.112490654 | -0.950681329  |
| H  | 1.044275522  | -6.876338959  | -5.735839367  | H | 2.930533409  | -4.932606697 | -0.289339095  |
| H  | 3.487050295  | -7.299756527  | -5.356424809  | H | 3.010390520  | -3.193901539 | -0.493126452  |
| H  | 3.695824146  | -7.489916325  | -7.102582455  | H | 1.540629745  | -4.060129642 | -0.933688879  |
| H  | 3.434560061  | -9.701736450  | -6.011375904  | C | 5.488842010  | -4.089646816 | -1.259128332  |
| H  | 1.893199682  | -9.205917358  | -5.320852280  | H | 6.531633854  | -4.272831440 | -1.519695997  |
| H  | 2.519909620  | -9.504326820  | -8.307534218  | H | 5.402960300  | -3.066859245 | -0.870197713  |
| H  | 0.156042993  | -8.905390739  | -8.718270302  | H | 5.216249466  | -4.762903690 | -0.439261287  |
| H  | -0.130899578 | -8.703859329  | -6.990234375  | C | 5.175078392  | -4.999118328 | -6.129899502  |
| H  | 0.243147448  | -6.498786926  | -8.134354591  | H | 6.165915489  | -5.370429039 | -5.862502098  |
| H  | 1.809372187  | -7.043236732  | -8.687208176  | H | 4.694847107  | -5.742270470 | -6.758181572  |
| H  | 1.482419729  | -10.568316460 | -7.357418060  | H | 5.299487114  | -4.091960907 | -6.733006477  |
| Pd | 3.179976702  | -3.558232307  | -8.025667191  | O | 6.539585114  | -4.448898315 | -3.841314793  |
| Cl | 3.274112225  | -1.602971315  | -6.515552044  | C | 7.046395779  | -3.155690193 | -4.187752724  |
| C  | 3.161418200  | -4.995817661  | -9.432969093  | H | 6.572461605  | -2.767627716 | -5.097661495  |
| C  | 2.156494617  | -4.988964558  | -10.415674210 | H | 6.877635002  | -2.438680649 | -3.373826742  |
| C  | 4.181795597  | -5.954551220  | -9.536613464  | H | 8.120428085  | -3.273673296 | -4.351336956  |
| C  | 2.154259682  | -5.932758808  | -11.447874069 | H | 4.071518898  | -1.333875179 | -9.113042831  |
| C  | 4.178983212  | -6.900225639  | -10.567714691 |   |              |              |               |
| C  | 3.160056591  | -6.898460865  | -11.521980286 |   |              |              |               |
| H  | 1.351844549  | -4.259639263  | -10.367105484 |   |              |              |               |
| H  | 4.986291885  | -5.979911804  | -8.807071686  |   |              |              |               |

=====  
3K'  
=====

|    |              |               |               |   |              |              |               |
|----|--------------|---------------|---------------|---|--------------|--------------|---------------|
| C  | 0.881198823  | -4.404781342  | -3.113425732  | H | 4.829458237  | -5.854452610 | -8.806769371  |
| C  | 0.238130480  | -3.149299860  | -3.000399590  | H | 1.292800546  | -5.045195103 | -12.189828873 |
| C  | -1.057030559 | -3.106473207  | -2.470170021  | H | 4.719477177  | -7.259737015 | -10.825533867 |
| C  | -1.731011868 | -4.253901958  | -2.047418356  | H | 2.936158180  | -6.884685516 | -12.521962166 |
| C  | -1.086604714 | -5.485106945  | -2.197911263  | N | 4.517137527  | -2.077828169 | -9.044157982  |
| C  | 0.201317161  | -5.586669922  | -2.733056784  | H | 5.221727848  | -2.644298077 | -9.508875847  |
| C  | 2.354218006  | -4.470710278  | -3.405859709  | C | 0.845971048  | -6.965878010 | -2.881977320  |
| C  | 2.925511599  | -4.692236423  | -4.688382149  | H | 1.677880287  | -6.870072365 | -3.586801291  |
| C  | 4.338983536  | -4.784595966  | -4.791215897  | C | -0.126900867 | -8.015446663 | -3.451407909  |
| C  | 5.122311115  | -4.529946327  | -3.657670498  | C | 1.435228229  | -7.464066029 | -1.549177408  |
| C  | 4.580458164  | -4.319074631  | -2.392383575  | H | 2.228017569  | -6.802487373 | -1.195711732  |
| C  | 3.182283401  | -4.324519157  | -2.262191057  | H | 0.659231901  | -7.510496616 | -0.776341617  |
| H  | -1.557413578 | -2.146468878  | -2.373833179  | H | 1.859415174  | -8.467972755 | -1.666017652  |
| H  | -1.601629376 | -6.389885902  | -1.887806058  | H | -0.921993852 | -8.261744499 | -2.739539146  |
| P  | 1.997862935  | -4.743519306  | -6.331192493  | H | 0.408974618  | -8.945466042 | -3.669654369  |
| C  | 0.263468981  | -3.962426662  | -6.282551289  | H | -0.604111373 | -7.673982143 | -4.375223637  |
| C  | -0.914921165 | -4.879436970  | -5.888153553  | C | -3.121880293 | -4.165489197 | -1.436598182  |
| C  | -2.236446857 | -4.092100620  | -5.829753399  | H | -3.419368267 | -3.108387232 | -1.450486898  |
| C  | -2.545668364 | -3.421055555  | -7.173851967  | C | -3.116174459 | -4.630308628 | 0.032295421   |
| C  | -1.382313728 | -2.516096115  | -7.603176594  | C | -4.158047676 | -4.952043056 | -2.260288000  |
| C  | -0.042153403 | -3.271414995  | -7.637284279  | H | -4.179126263 | -4.607012749 | -3.298887730  |
| H  | 0.362153590  | -3.178115368  | -5.533631325  | H | -3.925112963 | -6.022984982 | -2.269007206  |
| H  | -0.736662209 | -5.350180149  | -4.924601555  | H | -5.162226200 | -4.834072590 | -1.837343693  |
| H  | -1.029348612 | -5.680132866  | -6.627689838  | H | -2.836933374 | -5.687520027 | 0.108267270   |
| H  | -3.046895504 | -4.772878170  | -5.539804935  | H | -4.108657360 | -4.514179230 | 0.482480645   |
| H  | -2.167711973 | -3.334888935  | -5.038953304  | H | -2.400020361 | -4.053288937 | 0.626228452   |
| H  | -2.702831984 | -4.196936607  | -7.938063145  | C | 0.927794039  | -1.850847483 | -3.427091360  |
| H  | -1.575469255 | -2.082041264  | -8.592228889  | H | 1.700121403  | -2.096713305 | -4.162530422  |
| H  | -1.300943375 | -1.672663212  | -6.904637814  | C | 1.642567277  | -1.153589845 | -2.252885342  |
| H  | 0.764363468  | -2.575485706  | -7.892134666  | C | -0.035914686 | -0.850035310 | -4.093191624  |
| H  | -0.073765732 | -4.022814274  | -8.435700417  | H | -0.671200216 | -1.325903177 | -4.845315456  |
| H  | -3.477549076 | -2.845084906  | -7.113404274  | H | -0.694888592 | -0.366499603 | -3.361988544  |
| C  | 1.641543984  | -6.573703766  | -6.628540039  | H | 0.542341232  | -0.064107530 | -4.589021206  |
| C  | 2.828819036  | -7.536215305  | -6.423547268  | H | 0.949414432  | -0.975694537 | -1.421675444  |
| C  | 2.353865147  | -8.999373436  | -6.479280949  | H | 2.040596247  | -0.186966404 | -2.580641508  |
| C  | 1.630916715  | -9.306385994  | -7.799669266  | H | 2.479735613  | -1.746888161 | -1.884914637  |
| C  | 0.474214315  | -8.323317528  | -8.035033226  | C | 2.622835636  | -4.153692722 | -0.860135972  |
| C  | 0.971783400  | -6.868308067  | -7.989621639  | H | 2.936307192  | -4.982718945 | -0.214053914  |
| H  | 0.913337588  | -6.793773651  | -5.837701321  | H | 3.004337072  | -3.239946365 | -0.391399384  |
| H  | 3.330658913  | -7.340821743  | -5.470154285  | H | 1.536777854  | -4.108643055 | -0.836574018  |
| H  | 3.562075138  | -7.378300190  | -7.222975731  | C | 5.486758232  | -4.097068310 | -1.206562996  |
| H  | 3.212838411  | -9.668760300  | -6.346617699  | H | 6.529743195  | -4.248733044 | -1.486230254  |
| H  | 1.672990084  | -9.190491676  | -5.638292313  | H | 5.377652168  | -3.080065012 | -0.808949530  |
| H  | 2.345725536  | -9.216585159  | -8.630408287  | H | 5.247748375  | -4.783674717 | -0.386848330  |
| H  | -0.002053034 | -8.518379211  | -9.003602028  | C | 5.126532078  | -5.128942013 | -6.034624577  |
| H  | -0.298293561 | -8.473448753  | -7.265948772  | H | 5.999936581  | -5.724738121 | -5.758012295  |
| H  | 0.142768681  | -6.185201645  | -8.188312531  | H | 4.548381805  | -5.686163902 | -6.761564732  |
| H  | 1.697701931  | -6.712425709  | -8.789646149  | H | 5.491985321  | -4.222218037 | -6.529696941  |
| H  | 1.266159773  | -10.340906143 | -7.804428101  | O | 6.499958992  | -4.503869534 | -3.812905788  |
| Pd | 3.242573977  | -3.382271528  | -7.767003059  | C | 6.988267899  | -3.199306488 | -4.154969215  |
| Cl | 3.572025299  | -1.592212677  | -6.059732437  | H | 6.407937050  | -2.753879786 | -4.972027779  |
| C  | 3.107390642  | -4.645535946  | -9.322974205  | H | 6.937407017  | -2.525877476 | -3.289500952  |
| C  | 2.126333237  | -4.424632072  | -10.303380966 | H | 8.031113625  | -3.322566986 | -4.457886696  |
| C  | 4.044917107  | -5.668032169  | -9.535299301  | H | 4.937196732  | -1.508946657 | -8.308541298  |
| C  | 2.065627337  | -5.226919174  | -11.446009636 | C | 3.741187811  | -1.299999714 | -9.964492798  |
| C  | 3.986429453  | -6.468732834  | -10.682270050 | C | 3.664901257  | -1.664013505 | -11.310491562 |
| C  | 2.989064455  | -6.257650375  | -11.635754585 | C | 2.998257160  | -0.217139900 | -9.478094101  |
| H  | 1.405797958  | -3.621334314  | -10.183968544 | C | 2.846192360  | -0.935024679 | -12.175546646 |

C 2.187474489 0.503649354 -10.352092743  
C 2.106415033 0.150154650 -11.703149796  
H 4.219794750 -2.525884867 -11.672361374  
H 3.041432381 0.020182911 -8.417716026  
H 2.785878897 -1.223893642 -13.221895218  
H 1.610407233 1.343416333 -9.972705841  
H 1.469457150 0.714017808 -12.379520416

=====  
3L  
=====

C 3.802748442 -2.090206623 -6.840177536  
C 4.820227623 -2.075618029 -7.837225437  
C 4.819906712 -1.055226326 -8.796810150  
C 3.862988949 -0.040472072 -8.823349953  
C 2.878247261 -0.066521771 -7.836892605  
C 2.842000961 -1.043895245 -6.835740566  
C 3.932524443 -3.017603874 -5.638759136  
C 3.178868532 -4.223057747 -5.384420395  
C 3.443314791 -4.947850704 -4.192371845  
C 4.508267879 -4.544414043 -3.367877007  
C 5.214000225 -3.363481283 -3.567844868  
C 4.883010387 -2.569832563 -4.683220387  
H 5.614646912 -1.033630967 -9.537911415  
H 2.129195452 0.718208492 -7.824059963  
P 1.773173213 -4.759265900 -6.547805786  
C 0.232587144 -4.009017467 -5.750520229  
C 0.201786458 -3.991101742 -4.208365917  
C -1.005375981 -3.195552588 -3.682398558  
C -2.321310759 -3.757774830 -4.236134052  
C -2.285909653 -3.787228107 -5.769307137  
C -1.084107161 -4.584466457 -6.306352615  
H 0.280697942 -2.989466906 -6.133282185  
H 1.126334190 -3.573648453 -3.798511744  
H 0.120366603 -5.017589569 -3.830383778  
H -1.005989552 -3.213831663 -2.585238457  
H -0.904070497 -2.143408060 -3.980060339  
H -2.467955351 -4.778432369 -3.852092743  
H -3.215524197 -4.211759090 -6.169287205  
H -2.222765446 -2.759872437 -6.147696495  
H -1.058747649 -4.520726204 -7.395392418  
H -1.200725555 -5.637876511 -6.016372681  
H -3.172891378 -3.162985802 -3.883076906  
C 1.420537472 -6.629675865 -6.517376900  
C 2.578104734 -7.639132977 -6.364238262  
C 2.006054401 -9.045011520 -6.113089561  
C 1.117841721 -9.484641075 -7.289128780  
C 0.027393159 -8.444111824 -7.592402935  
C 0.618459761 -7.034972668 -7.781898975  
H 0.745655000 -6.757027626 -5.661323547  
H 3.280438662 -7.358179569 -5.579272270  
H 3.151362896 -7.658659935 -7.290567875  
H 2.826487541 -9.759558678 -5.970983028  
H 1.420561075 -9.047923088 -5.181348324  
H 1.750909090 -9.603744507 -8.179835320  
H -0.531888604 -8.732033730 -8.491200447  
H -0.699220121 -8.422132492 -6.766461849  
H -0.176894709 -6.323945045 -8.008562088  
H 1.295997143 -7.025081158 -8.641922951

H 0.666911066 -10.464234352 -7.087365627  
Pd 2.073329210 -4.015084267 -8.698160172  
C 3.478894711 -5.469042778 -9.027601242  
C 3.385149240 -6.085616112 -10.294430733  
C 4.496870041 -5.938081264 -8.181056976  
C 4.282170773 -7.078071117 -10.704476357  
C 5.407362461 -6.918418884 -8.587733269  
C 5.311401844 -7.492228508 -9.855994225  
H 2.587215900 -5.800287247 -10.979341507  
H 4.583388805 -5.548133373 -7.173017025  
H 4.173450470 -7.527988911 -11.689370155  
H 6.188571453 -7.240619183 -7.901778698  
H 6.017110825 -8.254822731 -10.174289703  
N 2.747086763 -3.053167582 -10.575527191  
H 3.442687273 -3.613752365 -11.061414719  
H -2.667060137 -1.927219272 -9.738994598  
C -1.948202848 -2.240334511 -8.971161842  
H -2.336739779 -3.145418406 -8.497156143  
H -1.893367290 -1.453619838 -8.212439537  
H -0.936911941 -4.586691856 -9.997379303  
C -0.675187051 -3.680997133 -10.555293083  
H -1.452363372 -3.500214338 -11.308328629  
H 0.260214806 -3.889439821 -11.085290909  
C -0.541448712 -2.493547678 -9.569453239  
H 0.865253866 -1.290776014 -10.758615494  
H -0.832274199 -0.962547839 -11.143790245  
H -0.109944418 -0.366913170 -9.631320000  
C -0.136092484 -1.208359122 -10.331299782  
O 0.348579377 -2.750291586 -8.521139145  
H 2.002815723 -2.807168007 -11.220158577  
C 1.812209368 -0.865051329 -5.720826626  
H 1.726163387 -1.812055111 -5.184895992  
C 0.420237005 -0.487718433 -6.263629913  
C 2.279662848 0.189144999 -4.697275162  
H 3.199954271 -0.109694906 -4.192320347  
H 2.460237265 1.151365399 -5.190706730  
H 1.508563280 0.341447681 -3.933120251  
H 0.398396194 0.549677551 -6.617872715  
H -0.327784032 -0.562286139 -5.466668129  
H 0.146085799 -1.148511887 -7.091578484  
C 3.942612886 1.075131655 -9.857994080  
H 4.845698357 0.896663725 -10.458034515  
C 4.098145485 2.452935219 -9.188146591  
C 2.739303589 1.067385435 -10.816637993  
H 2.672971487 0.121323310 -11.363903046  
H 1.798057795 1.197751045 -10.273076057  
H 2.821656704 1.876941204 -11.551069260  
H 3.209507942 2.707423925 -8.600090027  
H 4.233953953 3.237165451 -9.941425323  
H 4.961386204 2.469542742 -8.515311241  
C 5.979121208 -3.073329926 -7.900685787  
H 5.710615158 -3.938806772 -7.296778679  
C 7.289588451 -2.495827913 -7.325972080  
C 6.263009548 -3.561087132 -9.336680412  
H 5.352285385 -3.874104261 -9.846296310  
H 6.753410339 -2.783707619 -9.933828354  
H 6.932319641 -4.426065445 -9.310085297  
H 7.529144287 -1.531995296 -7.789889812



H 8.120213509 -3.181295633 -7.529572487  
H 7.237993717 -2.350518703 -6.248280525  
H 3.189962387 -2.195306063 -10.245276451  
C 2.624417067 -6.078348160 -3.597496748  
H 1.739630342 -6.318226814 -4.168897152  
H 3.210234404 -6.993687153 -3.478549004  
H 2.304510832 -5.786874294 -2.592622042  
C 6.266037941 -2.931592941 -2.574426174  
H 6.291182518 -3.604606152 -1.717176437  
H 7.263131618 -2.911507607 -3.031880379  
H 6.068858624 -1.919907093 -2.204441786  
C 5.553758621 -1.207697034 -4.758146286  
H 5.221463203 -0.586396873 -3.917684317  
H 6.640993118 -1.283238649 -4.664786339  
H 5.333981037 -0.666667461 -5.674830914  
O 4.786306381 -5.316226006 -2.248167515  
C 5.795101166 -6.300487995 -2.475163937  
H 5.517115116 -6.981745243 -3.291165829  
H 6.758584499 -5.835147381 -2.723664999  
H 5.896150589 -6.868633270 -1.547356963

=====  
3L'  
=====

C 4.156729221 -2.558399200 -7.077808857  
C 5.295826912 -2.856878281 -7.877613068  
C 5.592238903 -2.042223692 -8.981346130  
C 4.830916882 -0.927569926 -9.323787689  
C 3.712293863 -0.650306106 -8.533126831  
C 3.357003927 -1.428969979 -7.427787304  
C 4.034701824 -3.216244459 -5.704896450  
C 3.143449306 -4.269441128 -5.284580231  
C 3.251322508 -4.770151615 -3.959835768  
C 4.277556896 -4.292748928 -3.129908323  
C 5.091646671 -3.220233917 -3.478858232  
C 4.939649582 -2.656474113 -4.758535862  
H 6.466190815 -2.271759272 -9.583964348  
H 3.094235659 0.201808155 -8.789620399  
P 1.684846163 -4.837962627 -6.346395969  
C 0.196227238 -3.890970230 -5.573856354  
C 0.511791587 -3.059584856 -4.307716370  
C -0.663251579 -2.126299381 -3.974862814  
C -1.937471986 -2.938787460 -3.706146479  
C -2.258729696 -3.850776434 -4.897990704  
C -1.063099980 -4.742552757 -5.294374466  
H -0.038932111 -3.209252119 -6.402411938  
H 1.428011179 -2.481772423 -4.419000626  
H 0.672201812 -3.725936890 -3.454122066  
H -0.408575177 -1.507674575 -3.105204105  
H -0.830909252 -1.438768148 -4.816292763  
H -1.786306024 -3.551139593 -2.804791451  
H -3.123912334 -4.487120628 -4.672935009  
H -2.539372444 -3.229370356 -5.755434513  
H -1.339256883 -5.347235680 -6.162577629  
H -0.866798162 -5.441388607 -4.469493389  
H -2.786051750 -2.275666475 -3.497719288  
C 1.265403628 -6.679295063 -6.096144199  
C 2.385740995 -7.697461605 -5.802425861

C 1.759515524 -9.042716980 -5.395436764  
C 0.871194005 -9.585126877 -6.528297424  
C -0.188230529 -8.556360245 -6.957586288  
C 0.442390919 -7.194309235 -7.301174641  
H 0.590681911 -6.689285755 -5.236176968  
H 3.079883337 -7.339387894 -5.040129185  
H 2.972305775 -7.853572845 -6.707127094  
H 2.551443577 -9.763824463 -5.157209396  
H 1.161884546 -8.916121483 -4.480031013  
H 1.509325862 -9.819619179 -7.392014503  
H -0.752333283 -8.930057526 -7.820912838  
H -0.915278494 -8.419820786 -6.143093586  
H -0.339084506 -6.482726574 -7.583638668  
H 1.103198171 -7.287434578 -8.170181274  
H 0.390095621 -10.523383141 -6.225382328  
Pd 1.935682058 -4.318234921 -8.569086075  
C 3.250518322 -5.831032276 -8.872068405  
C 3.097868204 -6.418651581 -10.144140244  
C 4.192569733 -6.410168648 -8.012902260  
C 3.864326954 -7.519513607 -10.538085938  
C 4.964323521 -7.511685848 -8.400609016  
C 4.807404041 -8.072122574 -9.667547226  
H 2.375125408 -6.016943932 -10.850431442  
H 4.332736969 -6.008604050 -7.015727520  
H 3.724194765 -7.940888882 -11.531135559  
H 5.688910961 -7.929345131 -7.704107285  
H 5.407230854 -8.925315857 -9.973155022  
N 2.545989513 -3.129031181 -10.412826538  
H -2.976850033 -3.138949156 -9.011629105  
C -2.024922132 -3.093074083 -8.467995644  
H -1.972805977 -3.960932016 -7.806256771  
H -2.017230511 -2.187407017 -7.852717876  
H -0.726570904 -5.263499737 -9.502389908  
C -0.801314175 -4.418778896 -10.194656372  
H -1.720744491 -4.541176319 -10.781184196  
H 0.044974491 -4.480060577 -10.884624481  
C -0.807361484 -3.083751202 -9.412941933  
H -0.144687891 -1.858463287 -11.111375809  
H -1.906507730 -2.007654667 -11.002787590  
H -1.024036050 -0.964568198 -9.866366386  
C -0.986967802 -1.913278937 -10.411454201  
O 0.366636872 -2.860471010 -8.668053627  
C 2.136629820 -1.003796577 -6.611484051  
H 1.629900813 -1.919642806 -6.320546627  
C 1.106557846 -0.180906758 -7.400621414  
C 2.526497364 -0.231399447 -5.336139202  
H 3.108142376 -0.840448678 -4.643811703  
H 3.115555048 0.656292975 -5.592504501  
H 1.624693632 0.102481343 -4.810936451  
H 1.466892004 0.832510054 -7.617355824  
H 0.197973445 -0.075065129 -6.796952724  
H 0.831914008 -0.700219393 -8.318778038  
C 5.197749615 -0.055095922 -10.516066551  
H 6.122895241 -0.462235451 -10.946269035  
C 5.481476307 1.394673586 -10.082098961  
C 4.116673470 -0.097325400 -11.613732338  
H 3.973123550 -1.111904979 -11.995532036  
H 3.153413773 0.260104030 -11.231614113

H 4.398189068 0.543253362 -12.457287788  
H 4.581619263 1.865353823 -9.670549393  
H 5.810337067 1.997133732 -10.936442375  
H 6.260808468 1.433337331 -9.314154625  
C 6.285416126 -3.989871979 -7.587236881  
H 5.795622826 -4.706541538 -6.928731441  
C 7.556804657 -3.499387980 -6.864523888  
C 6.714556217 -4.729839325 -8.871675491  
H 5.861446857 -4.985162258 -9.501015663  
H 7.420786381 -4.131041527 -9.458400726  
H 7.221322060 -5.664124489 -8.612311363  
H 7.999091148 -2.643459797 -7.387221336  
H 8.304161072 -4.300676346 -6.841734409  
H 7.355965614 -3.205055714 -5.834975243  
H 3.329996347 -2.647938251 -9.980750084  
H 1.709850430 -2.552361012 -10.305804253  
C 2.853707790 -3.552683592 -11.728249550  
C 4.163804531 -3.954201460 -12.023937225  
C 1.873784065 -3.610550165 -12.726059914  
C 4.482736111 -4.415856361 -13.297562599  
C 2.202054739 -4.080875397 -13.997832298  
C 3.503469229 -4.488877773 -14.291222572  
H 4.918501854 -3.910341978 -11.245273590  
H 0.862644553 -3.282715321 -12.510163307  
H 5.501410961 -4.727923870 -13.511396408  
H 1.432162762 -4.121778965 -14.763860703  
H 3.753462315 -4.853819370 -15.283122063  
C 2.290299177 -5.712390900 -3.255692005  
H 1.363455415 -5.863796711 -3.795436144  
H 2.733742476 -6.695372581 -3.068639994  
H 2.044135809 -5.298519135 -2.274654627  
C 6.072971344 -2.657242537 -2.479336977  
H 5.959840775 -3.141478300 -1.509149432  
H 7.108145237 -2.788519621 -2.818130016  
H 5.920847416 -1.581514955 -2.342772722  
C 5.736865520 -1.389498711 -5.028964996  
H 5.344173908 -0.571035326 -4.413434029  
H 6.788507462 -1.507104874 -4.755809784  
H 5.697398663 -1.065519214 -6.064581871  
O 4.393024921 -4.842889786 -1.861851215  
C 5.329203606 -5.918138981 -1.792648911  
H 5.068986416 -6.723937988 -2.492506742  
H 6.347270966 -5.573538780 -2.018228292  
H 5.295608521 -6.301185131 -0.769966483

=====  
3L-TS  
=====

C 3.822985411 -2.088481426 -6.739003181  
C 4.845654488 -2.059211254 -7.730160713  
C 4.827985764 -1.046468616 -8.694736481  
C 3.841069221 -0.064591192 -8.742962837  
C 2.865498304 -0.088443242 -7.749888897  
C 2.849946737 -1.054251432 -6.738520145  
C 3.940896988 -3.030124187 -5.551192284  
C 3.169682026 -4.229375839 -5.324125290  
C 3.424217701 -4.985907078 -4.150531292  
C 4.496471405 -4.615000248 -3.320218086

C 5.213320255 -3.436174870 -3.489498377  
C 4.889888287 -2.611788988 -4.583466530  
H 5.613912106 -1.024119616 -9.444928169  
H 2.091621399 0.671249747 -7.758874416  
P 1.786082983 -4.725136280 -6.529284000  
C 0.216720998 -4.006083965 -5.722921371  
C 0.181525141 -4.024188995 -4.179561138  
C -1.032443523 -3.254390717 -3.632311821  
C -2.343969584 -3.824204445 -4.188753605  
C -2.319264174 -3.826410055 -5.722779274  
C -1.100434303 -4.588791847 -6.278011322  
H 0.256643146 -2.968673468 -6.057359695  
H 1.103603005 -3.609582901 -3.762031555  
H 0.111298457 -5.061047554 -3.830081701  
H -1.026748538 -3.294904947 -2.536016226  
H -0.946879625 -2.194673538 -3.907876968  
H -2.473924875 -4.853743076 -3.823582649  
H -3.238800526 -4.268642426 -6.125500679  
H -2.288505793 -2.788449526 -6.078897953  
H -1.107782483 -4.539926529 -7.370079041  
H -1.193528891 -5.646803379 -5.999709129  
H -3.202217579 -3.248749495 -3.821218729  
C 1.427194357 -6.596461773 -6.524350643  
C 2.588793039 -7.604310989 -6.384533882  
C 2.021497726 -9.013628960 -6.143545151  
C 1.132410526 -9.444602966 -7.322102070  
C 0.038696826 -8.404284477 -7.614404202  
C 0.626809955 -6.992097378 -7.792145252  
H 0.753461361 -6.740408897 -5.670127392  
H 3.293550253 -7.326678753 -5.600451946  
H 3.158250093 -7.615784168 -7.313242912  
H 2.844374657 -9.727014542 -6.010412693  
H 1.438400865 -9.027198792 -5.210355282  
H 1.764243603 -9.553365707 -8.214906693  
H -0.521127403 -8.685648918 -8.514837265  
H -0.686544895 -8.391832352 -6.786843777  
H -0.171604380 -6.283420086 -8.014654160  
H 1.302544832 -6.973380566 -8.652623177  
H 0.683913469 -10.427013397 -7.129106998  
Pd 2.182446003 -3.908848763 -8.671917915  
C 3.436666965 -5.433457851 -9.072960854  
C 3.266860962 -6.053578377 -10.325582504  
C 4.464289188 -5.911296844 -8.249279022  
C 4.108887196 -7.089753628 -10.741064072  
C 5.322447777 -6.932531834 -8.671109200  
C 5.152051926 -7.527716160 -9.920619965  
H 2.467442513 -5.734257698 -10.988547325  
H 4.598938465 -5.501529694 -7.255159855  
H 3.950985909 -7.550881386 -11.713765144  
H 6.116669655 -7.270443916 -8.008435249  
H 5.814667702 -8.323882103 -10.249263763  
N 2.620719194 -2.890656233 -10.473926544  
H 2.565383673 -3.418377399 -11.340722084  
H -2.659137726 -2.045220852 -9.459780693  
C -1.683788538 -1.916448951 -8.975630760  
H -1.657576799 -2.545644999 -8.085060120  
H -1.590109944 -0.873299003 -8.657634735  
H -0.708666623 -4.436992645 -9.580144882

C -0.718884230 -3.736814737 -10.421167374  
H -1.666593909 -3.854912281 -10.959826469  
H 0.095163248 -4.018157482 -11.097290993  
C -0.534218371 -2.290205479 -9.919315338  
H 0.267732948 -1.584201813 -11.822953224  
H -1.487311602 -1.360786319 -11.663422585  
H -0.364220738 -0.302052557 -10.778449059  
C -0.534057677 -1.326489210 -11.123127937  
O 0.698798299 -2.136835575 -9.219907761  
H 1.599670172 -2.271693707 -10.019458771  
C 1.807966709 -0.895141602 -5.633303642  
H 1.713967681 -1.850709200 -5.113869190  
C 0.426931590 -0.500493646 -6.192516804  
C 2.261022329 0.136173308 -4.581336975  
H 3.169927835 -0.182211906 -4.067559719  
H 2.459434509 1.105134249 -5.053834438  
H 1.478238702 0.280233562 -3.827134848  
H 0.399037927 0.560366809 -6.466341019  
H -0.352044940 -0.650896847 -5.437119484  
H 0.187478870 -1.076492548 -7.089243889  
C 3.827989578 0.978436172 -9.850064278  
H 4.707113743 0.793735623 -10.483025551  
C 3.948845863 2.408066034 -9.293123245  
C 2.575673580 0.831241488 -10.734000206  
H 2.503875971 -0.176925197 -11.150923729  
H 1.665192604 1.005423188 -10.151114464  
H 2.595268250 1.553724408 -11.558206558  
H 3.086670160 2.660436630 -8.665480614  
H 3.991472006 3.139583588 -10.108131409  
H 4.851268768 2.520920515 -8.683293343  
C 6.003357410 -3.057100296 -7.805560112  
H 5.742938519 -3.923060656 -7.196489811  
C 7.320522785 -2.480923891 -7.245354176  
C 6.269016266 -3.537461042 -9.248999596  
H 5.347440243 -3.793934822 -9.771283150  
H 6.797630310 -2.771093130 -9.827553749  
H 6.901372910 -4.430274963 -9.235116005  
H 7.561891079 -1.525354266 -7.725145817  
H 8.146108627 -3.173616886 -7.446201324  
H 7.278581619 -2.318492651 -6.169270039  
H 3.531328917 -2.444455862 -10.413814545  
C 2.595127583 -6.122129440 -3.578386307  
H 1.711650014 -6.352713108 -4.156246662  
H 3.176731586 -7.041687489 -3.471629858  
H 2.272910357 -5.846129417 -2.569608450  
C 6.272857666 -3.041458607 -2.489454746  
H 6.295771599 -3.738409519 -1.651566505  
H 7.267415524 -3.018880129 -2.952330828  
H 6.087716579 -2.038232088 -2.091782331  
C 5.565289974 -1.251680970 -4.625655651  
H 5.228864193 -0.647500336 -3.774032354  
H 6.651598930 -1.332218885 -4.526456356  
H 5.351834297 -0.692559183 -5.532947540  
O 4.770451546 -5.420018673 -2.223245382  
C 5.767646313 -6.407921314 -2.483362675  
H 5.477028847 -7.064969540 -3.314812660  
H 6.734142303 -5.946339130 -2.726963520  
H 5.869936466 -7.001371861 -1.571698308

=====

3L-TS

=====

C 4.070044518 -2.404295683 -6.949048519  
C 5.108786583 -2.609147310 -7.903619766  
C 5.229245663 -1.721011758 -8.979729652  
C 4.358263493 -0.651566863 -9.184687614  
C 3.357596397 -0.456415772 -8.235164642  
C 3.215591192 -1.281341195 -7.113787651  
C 4.073056698 -3.181497574 -5.638424397  
C 3.164524555 -4.233911037 -5.239226341  
C 3.342677116 -4.834741116 -3.965989113  
C 4.462739944 -4.480122566 -3.193941832  
C 5.309502125 -3.430206537 -3.527061939  
C 5.073272228 -2.742119551 -4.731767654  
H 6.030576706 -1.877059340 -9.696851730  
H 2.667810917 0.370186448 -8.364355087  
P 1.704508662 -4.752943993 -6.342941284  
C 0.230671242 -3.755185843 -5.653279781  
C 0.264235467 -3.468068838 -4.136301041  
C -0.864194870 -2.509963989 -3.719188452  
C -2.236398935 -3.080521345 -4.100128651  
C -2.288934946 -3.384701252 -5.602427006  
C -1.149919629 -4.323166370 -6.045819759  
H 0.337327808 -2.811330080 -6.191362858  
H 1.232611418 -3.058295488 -3.835261583  
H 0.130780056 -4.406230450 -3.586080074  
H -0.806167424 -2.325820208 -2.639362812  
H -0.720716834 -1.538874388 -4.211875439  
H -2.412775993 -4.006134987 -3.532402277  
H -3.252317667 -3.832149506 -5.876111984  
H -2.214206934 -2.440867901 -6.157762051  
H -1.206154704 -4.464118004 -7.126942158  
H -1.303030014 -5.305517197 -5.580102444  
H -3.036435843 -2.383245945 -3.823659658  
C 1.169956326 -6.564023495 -6.075669289  
C 2.231662273 -7.646501541 -5.782504559  
C 1.535651922 -8.952201843 -5.361337185  
C 0.616454959 -9.457689285 -6.485780239  
C -0.377026230 -8.372131348 -6.930996895  
C 0.334868908 -7.053416252 -7.286811829  
H 0.487903684 -6.523400784 -5.217293262  
H 2.957461596 -7.331304073 -5.032824516  
H 2.799753428 -7.837691784 -6.692241669  
H 2.289712191 -9.711375237 -5.118945122  
H 0.949665248 -8.785641670 -4.444862843  
H 1.239492059 -9.742567062 -7.345268726  
H -0.956943333 -8.719865799 -7.794724464  
H -1.100828409 -8.184654236 -6.123621464  
H -0.398907632 -6.312196255 -7.605672359  
H 1.007584572 -7.207094193 -8.136657715  
H 0.079604872 -10.360763550 -6.170049191  
Pd 2.132667780 -4.300151348 -8.563276291  
C 3.308927059 -5.929683685 -8.690221786  
C 3.120403528 -6.679698467 -9.862662315  
C 4.270611763 -6.373158455 -7.774362564  
C 3.890597343 -7.816850185 -10.120790482

C 5.053693771 -7.501773834 -8.038086891  
C 4.868543148 -8.229001045 -9.212931633  
H 2.388104200 -6.373811245 -10.602252007  
H 4.413306236 -5.853600025 -6.834582329  
H 3.729341030 -8.372843742 -11.041483879  
H 5.801718235 -7.814785480 -7.312366486  
H 5.475460052 -9.106788635 -9.418941498  
N 2.754786730 -3.374739885 -10.440286636  
H -2.538298130 -1.955424547 -9.553557396  
C -1.529687047 -1.871967196 -9.131029129  
H -1.555180907 -2.245620728 -8.104956627  
H -1.253366113 -0.813362539 -9.099668503  
H -1.110140324 -4.562284946 -9.062329292  
C -0.968402624 -4.135366917 -10.058282852  
H -1.914121151 -4.220870495 -10.606966019  
H -0.219512969 -4.747951031 -10.565505028  
C -0.504285455 -2.668932199 -9.951751709  
H 0.302975744 -2.611481190 -11.989577293  
H -1.369460940 -2.036590815 -11.866068840  
H -0.029492309 -1.022385955 -11.284750938  
C -0.396203905 -2.051213264 -11.361429214  
O 0.764256239 -2.566863060 -9.309524536  
C 2.183436155 -0.870864511 -6.067468166  
H 1.973715186 -1.738658667 -5.441504955  
C 0.864543557 -0.397581100 -6.705827713  
C 2.743984222 0.221046731 -5.135614395  
H 3.603428602 -0.135984406 -4.564448357  
H 3.059996605 1.095787525 -5.715604305  
H 1.975063562 0.544918418 -4.424454212  
H 0.961816490 0.613862872 -7.116590500  
H 0.068859637 -0.354718238 -5.954161167  
H 0.566312373 -1.061242938 -7.520635128  
C 4.480835438 0.231104448 -10.418056488  
H 5.385819912 -0.084139295 -10.955539703  
C 4.652318954 1.714969397 -10.049434662  
C 3.281934023 0.033023439 -11.366949081  
H 3.211119890 -1.001225352 -11.713992119  
H 2.340924740 0.276715517 -10.861914635  
H 3.375513315 0.681725383 -12.245322227  
H 3.760810137 2.103303194 -9.544529915  
H 4.811218262 2.319101095 -10.949688911  
H 5.507601261 1.862176538 -9.381864548  
C 6.141376495 -3.736366034 -7.839321613  
H 5.796079636 -4.469771385 -7.110772610  
C 7.530194759 -3.247176170 -7.379128456  
C 6.305613995 -4.443998814 -9.202701569  
H 5.347052574 -4.660918236 -9.673465729  
H 6.899914742 -3.835376501 -9.894015312  
H 6.831336498 -5.394143105 -9.070015907  
H 7.875144482 -2.410484552 -7.997692585  
H 8.260972023 -4.058086395 -7.477967739  
H 7.533857346 -2.921607018 -6.339265347  
H 3.545239687 -2.830828190 -10.103730202  
H 1.701198936 -2.808197260 -10.117880821  
C 3.047425508 -3.918665886 -11.693990707  
C 4.318017006 -3.748817682 -12.276774406  
C 2.085235119 -4.651786327 -12.413399696  
C 4.611137390 -4.293258190 -13.524444580

C 2.384655952 -5.192524910 -13.661282539  
C 3.649315834 -5.021610260 -14.228039742  
H 5.074828625 -3.188151121 -11.734824181  
H 1.104304314 -4.802129269 -11.978587151  
H 5.601615429 -4.148781300 -13.949167252  
H 1.621777177 -5.756794930 -14.192380905  
H 3.881255388 -5.448537827 -15.199504852  
C 2.392329216 -5.768275738 -3.236914873  
H 1.480438352 -5.976676941 -3.778451681  
H 2.863293886 -6.723675728 -2.991635561  
H 2.117825031 -5.310245991 -2.281837463  
C 6.416662693 -3.018820763 -2.586659431  
H 6.364302635 -3.581601381 -1.654653788  
H 7.403221607 -3.181563854 -3.038476229  
H 6.353708267 -1.952907443 -2.343135834  
C 5.901376247 -1.489391208 -4.959824562  
H 5.638517380 -0.733399034 -4.209548950  
H 6.971379757 -1.678983808 -4.836474419  
H 5.750152588 -1.048041105 -5.940498829  
O 4.655165195 -5.147829056 -1.992653608  
C 5.534130573 -6.267923832 -2.104797125  
H 5.161929607 -7.000028610 -2.834789038  
H 6.542383671 -5.956000328 -2.408873320  
H 5.581429005 -6.732503414 -1.117109656

=====  
3M  
=====

C 3.075299978 -6.871421337 -3.522855282  
C 2.457113028 -7.125756264 -2.267680883  
C 2.383032084 -8.437252998 -1.792759418  
C 2.896164656 -9.517645836 -2.513237238  
C 3.478583574 -9.251248360 -3.749771833  
C 3.581958294 -7.955630302 -4.275514126  
C 3.396266699 -5.431590080 -3.856329679  
C 2.512557983 -4.492145061 -4.472641945  
C 2.851771593 -3.108085871 -4.436908722  
C 4.105674267 -2.725874662 -3.932736397  
C 5.012962341 -3.638871193 -3.392735481  
C 4.637650490 -4.990855694 -3.320222616  
H 1.913932562 -8.621974945 -0.831034362  
H 3.874499559 -10.085208893 -4.321619987  
P 1.039842129 -4.884506226 -5.590517044  
C -0.498976827 -4.095254898 -4.832916260  
C -0.579309642 -4.146999359 -3.297675848  
C -1.758350134 -3.297671795 -2.789089203  
C -3.083711147 -3.717734337 -3.443005323  
C -2.980540752 -3.676421881 -4.975728989  
C -1.823752284 -4.554930210 -5.483919144  
H -0.391159147 -3.051207542 -5.133449078  
H 0.353671759 -3.780932665 -2.856293917  
H -0.705429912 -5.182569504 -2.964855433  
H -1.823964834 -3.374137878 -1.696296096  
H -1.561455607 -2.240715981 -3.020159483  
H -3.332943678 -4.741231918 -3.124602556  
H -3.920749664 -4.008912563 -5.432451725  
H -2.813447714 -2.644316673 -5.311994553  
H -1.753910303 -4.473679066 -6.570926666

|    |              |               |               |   |              |               |               |
|----|--------------|---------------|---------------|---|--------------|---------------|---------------|
| H  | -2.041341543 | -5.597846985  | -5.231114388  | C | 3.579450846  | -11.097822189 | -0.657088399  |
| H  | -3.900030613 | -3.073017836  | -3.094828367  | H | 4.627687931  | -10.804804802 | -0.774860382  |
| C  | 0.726231933  | -6.728811264  | -5.773178577  | H | 3.144879580  | -10.472846985 | 0.131441325   |
| C  | -0.007729094 | -7.012139320  | -7.110874176  | H | 3.550314188  | -12.137312889 | -0.311316639  |
| C  | -0.136363253 | -8.524265289  | -7.365494251  | H | 0.821614623  | -10.772444725 | -1.074177027  |
| C  | -0.816407561 | -9.248781204  | -6.193373680  | H | 1.284997106  | -12.429650307 | -1.489310384  |
| C  | -0.089915916 | -8.955418587  | -4.872899532  | H | 0.795103014  | -11.293737411 | -2.764245033  |
| C  | 0.001417602  | -7.441225529  | -4.611341000  | C | 5.600238800  | -5.922585487  | -2.603438377  |
| H  | 1.730887651  | -7.146834373  | -5.860944271  | H | 5.700283527  | -5.640999794  | -1.548406839  |
| H  | 0.524584174  | -6.535423279  | -7.939373970  | H | 5.292286873  | -6.963753700  | -2.634202242  |
| H  | -1.008477688 | -6.568422318  | -7.088641167  | H | 6.604527950  | -5.855390549  | -3.035365105  |
| H  | -0.696246743 | -8.688636780  | -8.294633865  | C | 6.338665009  | -3.160448313  | -2.850122929  |
| H  | 0.863562703  | -8.950002670  | -7.524370193  | H | 6.492477417  | -3.498968363  | -1.819602728  |
| H  | -1.859328747 | -8.907710075  | -6.115584373  | H | 7.176617146  | -3.554512739  | -3.439135075  |
| H  | -0.603496015 | -9.439260483  | -4.032618999  | H | 6.391068935  | -2.071820259  | -2.858121872  |
| H  | 0.923910499  | -9.374001503  | -4.901633263  | C | 1.928739190  | -1.994170547  | -4.879335880  |
| H  | 0.514068186  | -7.263309002  | -3.668756247  | H | 1.515704989  | -2.149528980  | -5.878973484  |
| H  | -1.012909174 | -7.042683601  | -4.509931087  | H | 1.085637450  | -1.900878787  | -4.187016010  |
| H  | -0.851603806 | -10.328871727 | -6.382366180  | H | 2.447288990  | -1.038110495  | -4.870857716  |
| Pd | 1.468317628  | -3.930828810  | -7.704639435  | O | 4.460486412  | -1.383957267  | -3.957281351  |
| Cl | -0.535031736 | -2.374006748  | -7.770652771  | C | 5.132919312  | -1.005739927  | -5.161530495  |
| C  | 3.204622984  | -4.937587738  | -7.834080696  | H | 6.073389530  | -1.560666203  | -5.284603119  |
| C  | 3.347317696  | -5.984647751  | -8.760088921  | H | 4.504183292  | -1.178951025  | -6.042665005  |
| C  | 4.361421585  | -4.412916660  | -7.235828876  | H | 5.350287437  | 0.062072493   | -5.078703880  |
| C  | 4.616006851  | -6.474962711  | -9.094144821  | H | 2.365953684  | -2.185790777  | -9.596715927  |
| C  | 5.626178741  | -4.908730030  | -7.566347122  | C | 2.331411600  | 0.882865012   | -14.492633820 |
| C  | 5.761186600  | -5.938910007  | -8.500394821  | O | 1.775727510  | 0.363703310   | -13.320775032 |
| H  | 2.472252131  | -6.413780689  | -9.242130280  | C | 3.360093355  | 0.157834917   | -9.160090446  |
| H  | 4.281928062  | -3.614180326  | -6.507973671  | O | 2.458153725  | -0.369042486  | -10.101706505 |
| H  | 4.705674648  | -7.281793594  | -9.818556786  | C | -0.361522913 | -3.397033215  | -12.286386490 |
| H  | 6.508019924  | -4.487033844  | -7.088815689  | O | 0.354685038  | -2.287719250  | -11.802403450 |
| H  | 6.744762421  | -6.320654869  | -8.760278702  | C | -1.646981716 | 1.714308977   | -10.614758492 |
| N  | 2.051811934  | -3.172494173  | -9.647974968  | O | -0.576185882 | 0.919465542   | -11.040065765 |
| H  | 2.819423199  | -3.740535975  | -10.000406265 | C | 3.273618937  | 2.062007189   | -14.156499863 |
| H  | 1.303663611  | -3.145438910  | -10.357587814 | C | 1.212267518  | 1.388735652   | -15.430827141 |
| C  | 4.276167870  | -7.781291485  | -5.626115322  | C | 3.142764568  | -0.211358830  | -15.224123001 |
| H  | 3.976871014  | -6.819069862  | -6.048894405  | C | 3.901558876  | 1.528028846   | -9.639837265  |
| C  | 3.876297951  | -8.882010460  | -6.628291607  | C | 4.565446854  | -0.794169962  | -8.978312492  |
| C  | 5.810711384  | -7.758310318  | -5.479425430  | C | 2.645851374  | 0.346946836   | -7.805557728  |
| H  | 6.151587009  | -6.847643375  | -4.985674381  | C | -1.243218660 | -2.976802826  | -13.487709999 |
| H  | 6.157764435  | -8.619964600  | -4.897271633  | C | 0.622226238  | -4.488703728  | -12.765978813 |
| H  | 6.281966686  | -7.792770386  | -6.465773582  | C | -1.273732424 | -3.975746870  | -11.183317184 |
| H  | 4.320681095  | -9.849545479  | -6.369556904  | C | -2.980887651 | 0.965366066   | -10.832542419 |
| H  | 4.226720333  | -8.616067886  | -7.627308369  | C | -1.496564746 | 2.045448065   | -9.112512589  |
| H  | 2.792157173  | -9.017084122  | -6.673134804  | C | -1.672425747 | 3.030413389   | -11.422957420 |
| C  | 1.872255921  | -6.005556583  | -1.405648470  | H | 4.049107075  | 1.726872563   | -13.456288338 |
| H  | 1.690839529  | -5.149207115  | -2.056159258  | H | 3.768613100  | 2.478533983   | -15.042142868 |
| C  | 2.855216742  | -5.547363758  | -0.311393499  | H | 2.705992222  | 2.872857571   | -13.679939270 |
| C  | 0.526890516  | -6.392383099  | -0.761496603  | H | 1.599545598  | 1.841098785   | -16.351892471 |
| H  | -0.155452415 | -6.854081154  | -1.481103420  | H | 0.558127344  | 0.554036856   | -15.716284752 |
| H  | 0.660658836  | -7.096265316  | 0.067380659   | H | 0.605782986  | 2.138363838   | -14.908001900 |
| H  | 0.037899401  | -5.501662731  | -0.352568001  | H | 3.974560499  | -0.547975361  | -14.589730263 |
| H  | 3.166792393  | -6.395396233  | 0.309476137   | H | 2.495276928  | -1.072592616  | -15.430126190 |
| H  | 2.381664515  | -4.805230618  | 0.341582537   | H | 3.567569733  | 0.134248823   | -16.174427032 |
| H  | 3.747371674  | -5.091475010  | -0.743331969  | H | 3.097574472  | 2.280178785   | -9.669182777  |
| C  | 2.806094170  | -10.939087868 | -1.979195833  | H | 4.670464993  | 1.932574391   | -8.971450806  |
| H  | 3.276211500  | -11.598062515 | -2.721527576  | H | 4.338086128  | 1.432954192   | -10.642301559 |
| C  | 1.340554476  | -11.386039734 | -1.819572926  | H | 5.316928864  | -0.386829138  | -8.290648460  |

H 4.244896412 -1.764245629 -8.583125114  
H 5.054472446 -0.965756714 -9.945839882  
H 2.259064436 -0.613004684 -7.451836109  
H 3.306031466 0.762305260 -7.034011841  
H 1.790470243 1.024046183 -7.921740055  
H -2.967061043 0.010368994 -10.294136047  
H -3.849305153 1.540457487 -10.488957405  
H -3.122162819 0.750298798 -11.900393486  
H -0.535538852 2.544908285 -8.935977936  
H -2.294991255 2.701045990 -8.744008064  
H -1.511811495 1.126188517 -8.513764381  
H -0.746445358 3.595644712 -11.251875877  
H -1.734563708 2.806725502 -12.494994164  
H -2.516625166 3.677407742 -11.155334473  
H -1.798389077 -3.817129612 -13.920095444  
H -1.988327146 -2.233366251 -13.168338776  
H -0.617716312 -2.549923658 -14.284570694  
H 1.253819823 -4.823772907 -11.934718132  
H 0.110556930 -5.369125843 -13.172292709  
H 1.276094556 -4.083019733 -13.549184799  
H -0.686651528 -4.274173260 -10.308578491  
H -1.984639287 -3.213414192 -10.845195770  
H -1.841955304 -4.847156525 -11.532242775  
Na -0.307843029 -0.335277468 -12.856814384  
Na 2.403585672 -1.387983561 -12.109663010  
Na 0.092614323 -0.915853739 -9.879331589  
Na 1.565126419 1.379873395 -11.324809074

=====  
3M'  
=====

C 2.981685638 -7.126623631 -3.544482231  
C 2.292253494 -7.458287716 -2.345852852  
C 2.129907370 -8.800854683 -1.996731043  
C 2.625651836 -9.838287354 -2.789161444  
C 3.278938532 -9.494132996 -3.969977140  
C 3.470702648 -8.164307594 -4.370803833  
C 3.396283627 -5.683646679 -3.724663258  
C 2.607049227 -4.640923023 -4.301985741  
C 3.023932695 -3.288345337 -4.122435570  
C 4.255456924 -3.029461622 -3.497709990  
C 5.070322037 -4.041195393 -2.986460924  
C 4.622035980 -5.369865894 -3.074989796  
H 1.607298613 -9.044853210 -1.076513290  
H 3.661879778 -10.294265747 -4.596579075  
P 1.167281389 -4.845256329 -5.510742664  
C -0.362169027 -4.050667286 -4.740543842  
C -0.507497311 -4.234227657 -3.221067429  
C -1.668121457 -3.378342152 -2.681708097  
C -2.983177423 -3.674079657 -3.419128895  
C -2.815101147 -3.502700329 -4.936895847  
C -1.678817034 -4.388356686 -5.477214813  
H -0.193107292 -2.990746975 -4.941601276  
H 0.421250105 -3.951203108 -2.714566231  
H -0.691976905 -5.288359642 -2.989769936  
H -1.781741619 -3.548681736 -1.603494525  
H -1.414605618 -2.315715313 -2.808259010  
H -3.291393280 -4.708359241 -3.203760147

H -3.749626637 -3.748455048 -5.456323147  
H -2.587008715 -2.454874754 -5.173962593  
H -1.562799573 -4.218297482 -6.549685001  
H -1.951370478 -5.437683105 -5.323379517  
H -3.782989740 -3.023406029 -3.044479847  
C 0.773614228 -6.641486645 -5.904328823  
C 0.085762858 -6.745100498 -7.291753292  
C -0.068347886 -8.214753151 -7.720336914  
C -0.826378524 -9.040492058 -6.668506145  
C -0.166352808 -8.912919044 -5.287442207  
C -0.038478751 -7.438810825 -4.861173153  
H 1.761179686 -7.097552299 -5.999456882  
H 0.658039451 -6.191194534 -8.041316032  
H -0.904476702 -6.279312134 -7.252158642  
H -0.585389495 -8.258068085 -8.687193871  
H 0.927570105 -8.650479317 -7.878844261  
H -1.863389492 -8.678313255 -6.607811451  
H -0.742520928 -9.461405754 -4.531589508  
H 0.833017707 -9.365528107 -5.305958748  
H 0.424509019 -7.380609512 -3.879213333  
H -1.042524815 -7.011902332 -4.772318363  
H -0.877747238 -10.092850685 -6.974671364  
Pd 1.666898012 -3.705988169 -7.505008698  
Cl -0.260006458 -2.007664204 -7.430490017  
C 3.347275972 -4.802243710 -7.659291744  
C 3.459101915 -5.803514957 -8.635940552  
C 4.505791187 -4.394168377 -6.979390144  
C 4.708674908 -6.345865726 -8.957004547  
C 5.750435829 -4.949307919 -7.291834831  
C 5.859667301 -5.922052383 -8.288452148  
H 2.584571600 -6.135168552 -9.189194679  
H 4.446486473 -3.637580395 -6.206049919  
H 4.780428410 -7.097643375 -9.740003586  
H 6.635592461 -4.617812157 -6.752321243  
H 6.828520775 -6.344493389 -8.541734695  
N 2.189939976 -2.686800241 -9.422113419  
H 1.320474029 -2.633714914 -9.985635757  
C 4.245766640 -7.907767773 -5.663294315  
H 4.000840187 -6.905986309 -6.025222778  
C 3.875222683 -8.915232658 -6.769560337  
C 5.768683434 -7.948390961 -5.427734852  
H 6.106508732 -7.089730740 -4.846126556  
H 6.051961899 -8.863574982 -4.895194054  
H 6.297073364 -7.925175190 -6.385032177  
H 4.274318218 -9.914242744 -6.560739040  
H 4.294440269 -8.586497307 -7.722222805  
H 2.792100191 -9.009416580 -6.889314175  
C 1.726545334 -6.389501572 -1.409389138  
H 1.645334482 -5.462903500 -1.977987051  
C 2.661959887 -6.110821247 -0.217050120  
C 0.318757325 -6.741291523 -0.889757216  
H -0.341142535 -7.086822033 -1.690985799  
H 0.352947235 -7.527516365 -0.127370909  
H -0.140670300 -5.861685276 -0.425852507  
H 2.878772974 -7.035432816 0.330419660  
H 2.193156958 -5.406383991 0.479939789  
H 3.607499838 -5.676251888 -0.545513868  
C 2.446755886 -11.294960976 -2.389019489

H 2.919961691 -11.908666611 -3.167516232  
C 0.956631780 -11.681576729 -2.330590487  
C 3.152142763 -11.606727600 -1.055991650  
H 4.216685772 -11.355212212 -1.103931665  
H 2.710708857 -11.033688545 -0.232489944  
H 3.061639547 -12.670174599 -0.806975663  
H 0.433061868 -11.111649513 -1.554302454  
H 0.838738799 -12.746500969 -2.099110603  
H 0.459252149 -11.478982925 -3.284650087  
C 5.487398624 -6.423018456 -2.402514219  
H 5.530541420 -6.258770943 -1.319190383  
H 5.132224560 -7.436859131 -2.563369274  
H 6.520369530 -6.367361069 -2.763055563  
C 6.372384548 -3.694806099 -2.303486347  
H 6.432937622 -4.150480270 -1.309116602  
H 7.233892918 -4.066592216 -2.873096466  
H 6.474506855 -2.616035700 -2.185194731  
C 2.208288908 -2.085458040 -4.538115501  
H 1.882387877 -2.131773710 -5.580437183  
H 1.311403275 -1.997284889 -3.918030977  
H 2.776111603 -1.167931437 -4.401666164  
O 4.679318905 -1.714573383 -3.361076832  
C 5.500867844 -1.268758416 -4.443522453  
H 6.408636093 -1.881347060 -4.535917759  
H 4.956328869 -1.297128201 -5.395428181  
H 5.782387257 -0.236565858 -4.219960213  
H 2.351392746 -1.697677255 -9.153207779  
C 2.628063440 1.137793303 -13.999773026  
O 1.872686625 0.775433540 -12.880642891  
C 3.133509398 0.816384792 -8.610116959  
O 2.330482006 0.183428466 -9.576618195  
C -0.697086811 -2.765675545 -11.705307007  
O 0.252710193 -1.805243969 -11.303593636  
C -1.687409520 2.293087244 -10.453589439  
O -0.616405368 1.436736822 -10.730074883  
C 3.656421185 2.225039721 -13.612350464  
C 1.700894713 1.687652349 -15.104090691  
C 3.388802052 -0.092606857 -14.548585892  
C 2.585095167 2.230957031 -8.284928322  
C 4.579621792 0.958408594 -9.131309509  
C 3.132108450 0.007348134 -7.293822289  
C -2.115566492 -2.145475388 -11.732845306  
C -0.357445896 -3.282231808 -13.122383118  
C -0.742578149 -3.958760738 -10.716982841  
C -3.002313137 1.486295581 -10.366596222  
C -1.452584743 3.015647888 -9.107751846  
C -1.820080876 3.349667549 -11.573804855  
H 4.296123981 1.856534958 -12.800391197  
H 4.301451683 2.520114422 -14.448978424  
H 3.134941816 3.124808550 -13.258851051  
H 2.249584913 2.031618595 -15.989336014  
H 0.998611450 0.906664073 -15.423511505  
H 1.120070100 2.528542042 -14.707293510  
H 4.099151134 -0.468883455 -13.798748016  
H 2.677240372 -0.894291282 -14.781939507  
H 3.960701227 0.132891059 -15.457033157  
H 1.529537559 2.176319361 -7.996210098  
H 3.136707544 2.711547852 -7.468399525

H 2.677061558 2.909634590 -9.148175240  
H 5.241207600 1.446614623 -8.404670715  
H 4.992743969 -0.026903486 -9.366958618  
H 4.592453957 1.549898028 -10.056061745  
H 3.561561108 -0.989952505 -7.445222378  
H 3.708725929 0.503067732 -6.503494740  
H 2.105734825 -0.133137450 -6.941500664  
H -2.932550907 0.733317137 -9.571930885  
H -3.872862339 2.120862484 -10.158990860  
H -3.182384968 0.956910253 -11.310303688  
H -0.527287900 3.604339361 -9.151202202  
H -2.274056435 3.692611217 -8.842575073  
H -1.342902780 2.280945778 -8.300571442  
H -0.891818464 3.929987192 -11.655148506  
H -1.989899755 2.855151415 -12.539100647  
H -2.646146774 4.050629139 -11.401326180  
H -2.880784512 -2.878546953 -12.015027046  
H -2.376419306 -1.740739822 -10.749625206  
H -2.186535120 -1.323239803 -12.460922241  
H 0.649277568 -3.711072445 -13.142462730  
H -1.064224482 -4.045140266 -13.470786095  
H -0.369589388 -2.455786943 -13.846942902  
H 0.211707428 -4.496413231 -10.691562653  
H -0.943927646 -3.595952988 -9.704224586  
H -1.518084764 -4.684511662 -10.991021156  
Na -0.224385902 0.132338911 -12.494554520  
Na 2.409089088 -0.947833478 -11.589897156  
Na 0.030971875 -0.345770180 -9.460051537  
Na 1.542654872 1.863425136 -10.951465607  
C 3.266783714 -3.131358147 -10.246183395  
C 4.587232113 -2.788641691 -9.919184685  
C 3.025144815 -3.910165071 -11.388523102  
C 5.641119003 -3.202002764 -10.731040001  
C 4.086745262 -4.314984322 -12.201560020  
C 5.398367405 -3.961098909 -11.880759239  
H 4.777198315 -2.231745958 -9.009002686  
H 2.009335279 -4.194391251 -11.632561684  
H 6.659382343 -2.943019629 -10.453186035  
H 3.881960630 -4.916993141 -13.083862305  
H 6.223961353 -4.284059525 -12.509011269

=====  
3M-TS  
=====

C -2.194914818 -4.714456081 -4.080007553  
C -3.342446327 -4.393648624 -3.303363085  
C -4.425440311 -5.275562763 -3.280634403  
C -4.420859337 -6.473079681 -3.998594999  
C -3.292893887 -6.764826298 -4.761283875  
C -2.178308487 -5.916605473 -4.823344231  
C -0.966257632 -3.857825279 -3.870333195  
C -0.672673166 -2.640154123 -4.557344913  
C 0.330584228 -1.781677008 -4.022952080  
C 1.040090919 -2.188246965 -2.880657434  
C 0.851864994 -3.429372549 -2.274391890  
C -0.173988089 -4.257501602 -2.761014462  
H -5.297203541 -5.022808075 -2.684522152  
H -3.281574726 -7.691560745 -5.327141285

|    |              |              |               |   |              |              |               |
|----|--------------|--------------|---------------|---|--------------|--------------|---------------|
| P  | -1.311510205 | -2.110238314 | -6.252985477  | H | -1.849551916 | -8.016442299 | -6.825162411  |
| C  | -2.163331747 | -0.442826480 | -6.012895584  | H | -0.564131677 | -7.135575294 | -7.650774479  |
| C  | -2.960575104 | -0.281312704 | -4.707820892  | H | -2.177438021 | -6.423395157 | -7.515074730  |
| C  | -3.417102814 | 1.178148746  | -4.529533863  | C | -3.430673122 | -3.111249447 | -2.473547459  |
| C  | -4.210479259 | 1.678060412  | -5.746761799  | H | -2.696874857 | -2.408418179 | -2.870428562  |
| C  | -3.407074213 | 1.492936492  | -7.043819904  | C | -3.074736118 | -3.359828949 | -0.995125294  |
| C  | -2.983512402 | 0.026196828  | -7.236608028  | C | -4.812543392 | -2.436671019 | -2.566389084  |
| H  | -1.311878562 | 0.239826530  | -5.973762512  | H | -5.160656929 | -2.364540815 | -3.600362778  |
| H  | -2.346829414 | -0.579882205 | -3.851480722  | H | -5.572240829 | -2.982907295 | -1.996441364  |
| H  | -3.835724592 | -0.939312816 | -4.719433784  | H | -4.763994694 | -1.423318982 | -2.153015137  |
| H  | -4.014729977 | 1.270408034  | -3.613488197  | H | -3.714995146 | -4.140659332 | -0.568630695  |
| H  | -2.529815197 | 1.813815236  | -4.393173695  | H | -3.218387127 | -2.445585012 | -0.407456189  |
| H  | -5.150794983 | 1.111064076  | -5.819845200  | H | -2.035168648 | -3.670919895 | -0.882670641  |
| H  | -3.995802641 | 1.822644949  | -7.908832073  | C | -5.613238335 | -7.417481422 | -3.971723318  |
| H  | -2.504962683 | 2.118995905  | -7.018324852  | H | -5.352730751 | -8.290522575 | -4.585257530  |
| H  | -2.384049892 | -0.064156115 | -8.144891739  | C | -6.858259678 | -6.761128426 | -4.598220825  |
| H  | -3.884622335 | -0.583746314 | -7.359548092  | C | -5.911260128 | -7.920766830 | -2.547725201  |
| H  | -4.488156796 | 2.730946541  | -5.612654209  | H | -5.033017159 | -8.404770851 | -2.108349323  |
| C  | -2.562539577 | -3.305783749 | -6.991338730  | H | -6.201454639 | -7.094540596 | -1.888720155  |
| C  | -2.543041945 | -3.174399376 | -8.537355423  | H | -6.734572411 | -8.644087791 | -2.555422306  |
| C  | -3.451262712 | -4.220639229 | -9.206179619  | H | -7.170753479 | -5.883686543 | -4.020232677  |
| C  | -4.885266304 | -4.173389912 | -8.657002449  | H | -7.699886799 | -7.463001728 | -4.621893883  |
| C  | -4.886568546 | -4.317488194 | -7.128359795  | H | -6.656094074 | -6.429960728 | -5.621717930  |
| C  | -4.011322021 | -3.239144564 | -6.465366840  | C | -0.423159629 | -5.546632767 | -1.996289968  |
| H  | -2.154086590 | -4.287811756 | -6.747260571  | H | -0.650407672 | -5.341440201 | -0.943547368  |
| H  | -1.518087387 | -3.280852318 | -8.904407501  | H | -1.243392110 | -6.134226322 | -2.401027441  |
| H  | -2.875720263 | -2.173349619 | -8.832413673  | H | 0.472460836  | -6.178096771 | -1.997702122  |
| H  | -3.448434830 | -4.060008049 | -10.291792870 | C | 1.701629162  | -3.836727858 | -1.095341206  |
| H  | -3.033388853 | -5.222560883 | -9.038556099  | H | 1.105629563  | -3.910364389 | -0.176576942  |
| H  | -5.345140457 | -3.212083340 | -8.930494308  | H | 2.151633263  | -4.822066784 | -1.256802201  |
| H  | -5.908237934 | -4.249410152 | -6.733933926  | H | 2.504385471  | -3.117874146 | -0.930600405  |
| H  | -4.507202625 | -5.307814121 | -6.845977306  | C | 0.717175782  | -0.434708178 | -4.594438076  |
| H  | -4.033782005 | -3.363601685 | -5.384541512  | H | 0.756486714  | -0.432256639 | -5.685368538  |
| H  | -4.441097736 | -2.257689714 | -6.687849998  | H | 0.009837343  | 0.344691873  | -4.289760113  |
| H  | -5.497140408 | -4.958154202 | -9.119161606  | H | 1.703922391  | -0.146284401 | -4.232559204  |
| Pd | 0.565069735  | -1.896866798 | -7.678725243  | O | 2.012700558  | -1.346918464 | -2.357345581  |
| Cl | 0.212547928  | 0.594159007  | -8.198190689  | C | 1.508150697  | -0.420715004 | -1.395808220  |
| C  | 1.153943419  | -3.771265745 | -7.264107227  | H | 0.750384688  | 0.241370708  | -1.835079551  |
| C  | 1.041333079  | -4.789628506 | -8.225610733  | H | 1.066372514  | -0.941978395 | -0.535335720  |
| C  | 1.948771358  | -4.011106491 | -6.130155563  | H | 2.357964993  | 0.178267747  | -1.059291959  |
| C  | 1.736854792  | -5.996337414 | -8.078012466  | H | 2.963227034  | -1.257925272 | -8.444399834  |
| C  | 2.631256104  | -5.222136974 | -5.978761196  | C | 6.124906540  | -0.683746994 | -13.148139954 |
| C  | 2.538190365  | -6.217821121 | -6.955749035  | O | 5.178677082  | -0.253350496 | -12.211207390 |
| H  | 0.421664357  | -4.643908978 | -9.106134415  | C | 5.071202755  | 0.339756221  | -7.722256660  |
| H  | 2.049143314  | -3.249939442 | -5.363499165  | O | 4.476869106  | 0.276833028  | -8.993290901  |
| H  | 1.645323992  | -6.765522957 | -8.842426300  | C | 0.970206082  | -1.667403340 | -11.965110779 |
| H  | 3.243199348  | -5.384098530 | -5.094052315  | O | 2.022392273  | -1.020866871 | -11.242883682 |
| H  | 3.079192162  | -7.153406620 | -6.841784000  | C | 2.791753054  | 3.583526611  | -11.622825623 |
| N  | 2.304335356  | -1.891569734 | -8.902079582  | O | 3.190433502  | 2.281424522  | -11.294449806 |
| H  | 2.697123051  | -2.829122305 | -8.822872162  | C | 7.398901463  | -1.175510645 | -12.425109863 |
| H  | 2.065845966  | -1.455000520 | -10.151976585 | C | 6.502956867  | 0.481393099  | -14.090596199 |
| C  | -0.984737039 | -6.358148098 | -5.669651985  | C | 5.546540737  | -1.842538953 | -13.991637230 |
| H  | -0.389595479 | -5.475455761 | -5.917673111  | C | 6.156284809  | 1.441500306  | -7.708319187  |
| C  | -1.425599098 | -7.019672871 | -6.990753651  | C | 5.732328892  | -1.014589548 | -7.377926826  |
| C  | -0.069219545 | -7.329727173 | -4.898260593  | C | 4.017528534  | 0.672320485  | -6.640604496  |
| H  | 0.466384321  | -6.822307110 | -4.095608711  | C | 1.036987901  | -1.199685335 | -13.429783821 |
| H  | -0.652867198 | -8.149983406 | -4.463870525  | C | 1.181484580  | -3.190144300 | -11.904107094 |
| H  | 0.679215372  | -7.753978729 | -5.573181152  | C | -0.386292100 | -1.277674794 | -11.358950615 |



C 1.412627339 3.552830219 -12.320000648  
 C 2.686474562 4.441489220 -10.341937065  
 C 3.823924065 4.228282928 -12.574937820  
 H 7.158949852 -2.020645857 -11.766347885  
 H 8.180955887 -1.503126144 -13.120493889  
 H 7.809274673 -0.372005403 -11.801441193  
 H 7.237281799 0.190101907 -14.851268768  
 H 5.608986855 0.854704142 -14.606119156  
 H 6.924941540 1.312726736 -13.511881828  
 H 5.253601551 -2.675009489 -13.339375496  
 H 4.649139404 -1.508996844 -14.528532028  
 H 6.260124207 -2.224982500 -14.731395721  
 H 5.702057362 2.410761595 -7.952740192  
 H 6.652513504 1.539583683 -6.735359669  
 H 6.931672573 1.213818431 -8.453903198  
 H 6.232361317 -1.005269527 -6.402149677  
 H 4.976800919 -1.809859633 -7.355905056  
 H 6.481492043 -1.266175270 -8.140588760  
 H 3.226175547 -0.084668264 -6.617196560  
 H 4.458199501 0.729716778 -5.637728214  
 H 3.544729710 1.638805985 -6.855811596  
 H 0.682415903 3.048219442 -11.677014351  
 H 1.033420324 4.554846287 -12.554437637  
 H 1.477129221 2.992566824 -13.263512611  
 H 3.645290852 4.430099964 -9.809332848  
 H 2.422971249 5.485047340 -10.552652359  
 H 1.920379758 4.032098770 -9.671143532  
 H 4.801534653 4.302308083 -12.079607964  
 H 3.947995186 3.606292725 -13.470308304  
 H 3.533815145 5.236410141 -12.894852638  
 H 0.269360125 -1.685587525 -14.040906906  
 H 0.857352793 -0.117124565 -13.499648094  
 H 2.011831045 -1.448240995 -13.871858597  
 H 1.170743227 -3.530234814 -10.865353584  
 H 0.399792373 -3.730133533 -12.450470924  
 H 2.152061701 -3.453481436 -12.342360497  
 H -0.442816705 -1.591977835 -10.314258575  
 H -0.506887317 -0.189872935 -11.373336792  
 H -1.215893865 -1.736086011 -11.910706520  
 Na 3.112135887 0.500009596 -12.601234436  
 Na 4.361271381 -1.407454133 -10.484174728  
 Na 2.359672308 1.137105227 -9.526795387  
 Na 5.209328175 1.481007814 -10.752716064

=====  
 3M'-TS  
 =====

C 2.870852709 -7.320445538 -3.812833309  
 C 2.149002552 -7.628954411 -2.630495071  
 C 1.883189797 -8.965822220 -2.321600914  
 C 2.292432070 -10.010363579 -3.153807640  
 C 2.961851358 -9.680837631 -4.331621170  
 C 3.264455557 -8.359827995 -4.687404156  
 C 3.403261423 -5.918915749 -3.947113276  
 C 2.693730593 -4.823200226 -4.518293381  
 C 3.222017527 -3.511643887 -4.351366520  
 C 4.450028896 -3.354161501 -3.688093662  
 C 5.202353477 -4.423853874 -3.208679914

C 4.652075291 -5.713684082 -3.304310799  
 H 1.347787499 -9.199378014 -1.405680656  
 H 3.265195370 -10.488590240 -4.990596294  
 P 1.131323218 -4.928737164 -5.576149464  
 C -0.267403245 -4.506969452 -4.375312805  
 C -1.646558881 -4.434659481 -5.067619801  
 C -2.770416021 -4.287260532 -4.026358128  
 C -2.556337357 -3.053764820 -3.137581110  
 C -1.175130963 -3.102482319 -2.468878746  
 C -0.053895775 -3.246341228 -3.513018370  
 H -0.263911694 -5.370836735 -3.697048187  
 H -1.834765434 -5.326334000 -5.669282913  
 H -1.653391719 -3.582245827 -5.753366470  
 H -3.738032103 -4.226969242 -4.539606094  
 H -2.803632975 -5.188648701 -3.395075083  
 H -2.622873068 -2.149145365 -3.758208513  
 H -1.003343940 -2.198197842 -1.871444941  
 H -1.136680007 -3.952726126 -1.772436142  
 H 0.916412652 -3.283113956 -3.007585764  
 H -0.059677940 -2.363618135 -4.161273003  
 H -3.347593069 -2.981678486 -2.380891800  
 C 0.673856139 -6.667745590 -6.174664497  
 C -0.099217840 -6.555581093 -7.517041683  
 C -0.281269163 -7.939831734 -8.159762383  
 C -1.019950867 -8.902464867 -7.216637135  
 C -0.316678047 -8.984869003 -5.854053974  
 C -0.118083648 -7.592729568 -5.224057674  
 H 1.639973998 -7.124974251 -6.396989346  
 H 0.415452242 -5.880635738 -8.202181816  
 H -1.085592628 -6.109225750 -7.344337463  
 H -0.827039182 -7.835270882 -9.106229782  
 H 0.706787944 -8.351398468 -8.410508156  
 H -2.047792912 -8.538619041 -7.070992470  
 H -0.891548574 -9.614684105 -5.163066387  
 H 0.662854731 -9.465335846 -5.966706276  
 H 0.384532481 -7.702408791 -4.266395092  
 H -1.105059028 -7.157831669 -5.025612831  
 H -1.099435687 -9.899194717 -7.668446541  
 Pd 1.584404230 -3.610908985 -7.474261284  
 Cl -0.406051397 -1.950817585 -7.309890270  
 C 3.170240879 -4.813205242 -7.826321602  
 C 3.092739105 -5.837376118 -8.783344269  
 C 4.431441307 -4.485890865 -7.303138256  
 C 4.249602795 -6.473202705 -9.246306419  
 C 5.583453178 -5.134530544 -7.753725529  
 C 5.499862194 -6.121542931 -8.738273621  
 H 2.137423038 -6.137256622 -9.201044083  
 H 4.530919552 -3.702471018 -6.560321808  
 H 4.167610645 -7.243642807 -10.010542870  
 H 6.551098824 -4.852830410 -7.344907284  
 H 6.399286270 -6.611122131 -9.103127997  
 N 2.334547997 -2.261786699 -9.061253548  
 H 1.421058655 -2.167665005 -10.077195168  
 C 4.037718773 -8.104086876 -5.983706951  
 H 3.810548306 -7.090997219 -6.328351974  
 C 3.642378807 -9.082771301 -7.106361866  
 C 5.563204765 -8.169525146 -5.771494865  
 H 5.915094376 -7.338078499 -5.160636425

H 5.849999905 -9.108752251 -5.283986568  
H 6.075576782 -8.106859207 -6.736267567  
H 4.002575397 -10.098640442 -6.907907009  
H 4.086791992 -8.755815506 -8.048120499  
H 2.558391809 -9.134435654 -7.244477272  
C 1.664338946 -6.538721085 -1.672097325  
H 1.713009715 -5.580809593 -2.197348833  
C 2.577370167 -6.428688049 -0.435765624  
C 0.203117505 -6.750007153 -1.233247161  
H -0.460580766 -6.900597095 -2.090178251  
H 0.095960736 -7.618933678 -0.574987471  
H -0.153063372 -5.876157284 -0.676939547  
H 2.620535851 -7.383889675 0.100427099  
H 2.199443817 -5.667840004 0.257160395  
H 3.595541000 -6.152040482 -0.718204260  
C 2.006691933 -11.463057518 -2.802959442  
H 2.407423973 -12.080635071 -3.618076801  
C 0.493580997 -11.735300064 -2.714508772  
C 2.722395182 -11.880755424 -1.504767537  
H 3.802396536 -11.716699600 -1.579104066  
H 2.355198145 -11.301960945 -0.649399102  
H 2.550298452 -12.941249847 -1.288166881  
H 0.036078840 -11.161136627 -1.900718927  
H 0.298996359 -12.796890259 -2.523416042  
H -0.010615254 -11.455058098 -3.645069599  
C 5.434523106 -6.838869095 -2.646913052  
H 5.599109650 -6.624814987 -1.584001303  
H 4.939898014 -7.804698944 -2.717923403  
H 6.429194927 -6.943456173 -3.094530106  
C 6.557769775 -4.189444542 -2.587161064  
H 6.544411182 -4.378626347 -1.506312013  
H 7.308315754 -4.863204002 -3.014287472  
H 6.889299870 -3.164151669 -2.755048752  
C 2.632987976 -2.211315393 -4.863290787  
H 3.330601215 -1.743486404 -5.563953876  
H 1.679094434 -2.310271502 -5.369935513  
H 2.494378567 -1.499903679 -4.043594360  
O 4.958645821 -2.067339659 -3.573866844  
C 4.696013927 -1.448345304 -2.314466953  
H 3.618567944 -1.398851395 -2.106496096  
H 5.185261726 -1.985087276 -1.490484953  
H 5.098528385 -0.434163481 -2.373090744  
H 2.257967472 -1.399120808 -8.519067764  
C 2.842673063 1.174420595 -13.734756470  
O 2.049326897 0.895435929 -12.613918304  
C 2.403374195 1.681084633 -8.213567734  
O 1.924937129 0.918657303 -9.290594101  
C 0.081284516 -3.017591476 -11.564417839  
O 0.721127212 -1.886101961 -10.950932503  
C -2.148799658 1.764796615 -11.021648407  
O -0.895211101 1.142398596 -10.994539261  
C 3.807885647 2.338749886 -13.418817520  
C 1.945892930 1.570714593 -14.926961899  
C 3.670342684 -0.073850960 -14.120466232  
C 1.499673247 2.918973207 -7.989771843  
C 3.841489553 2.167091608 -8.505867004  
C 2.404626131 0.850772023 -6.910166740  
C -1.412589431 -2.698193312 -11.752723694

C 0.755374849 -3.286391020 -12.923008919  
C 0.190476641 -4.260316372 -10.667811394  
C -3.269309044 0.703448236 -10.956486702  
C -2.290477514 2.717672348 -9.812790871  
C -2.304941177 2.581082344 -12.324835777  
H 4.420365810 2.090089321 -12.543116570  
H 4.480699539 2.570150852 -14.253351212  
H 3.238007307 3.247140169 -13.183089256  
H 2.521936893 1.853906393 -15.816183090  
H 1.293915868 0.731047571 -15.203681946  
H 1.308013797 2.415568590 -14.642359734  
H 4.363120079 -0.345289677 -13.311816216  
H 3.001730680 -0.926203072 -14.290330887  
H 4.268978119 0.080194242 -15.026498795  
H 0.461693734 2.609236717 -7.823451996  
H 1.819593787 3.523070812 -7.132325649  
H 1.518801570 3.580952644 -8.869768143  
H 4.255947590 2.774100304 -7.691600800  
H 4.504120827 1.308580399 -8.662183762  
H 3.857911825 2.770534754 -9.423405647  
H 3.082127571 -0.002892352 -7.003644466  
H 2.731619120 1.436820865 -6.042331219  
H 1.405653119 0.450474203 -6.704672337  
H -3.170708895 0.106227420 -10.041770935  
H -4.272119522 1.148009181 -10.967167854  
H -3.189967394 0.019908866 -11.810625076  
H -1.504719615 3.483659506 -9.839025497  
H -3.261098385 3.227920532 -9.788614112  
H -2.176830530 2.158304453 -8.876079559  
H -1.513716817 3.339224100 -12.392805099  
H -2.209502459 1.920753598 -13.196695328  
H -3.272268772 3.093741179 -12.392175674  
H -1.939001799 -3.542248011 -12.211750031  
H -1.875373006 -2.479097128 -10.786294937  
H -1.582448721 -1.830568433 -12.404438972  
H 1.829185486 -3.442980051 -12.786200523  
H 0.331400335 -4.168044567 -13.416783333  
H 0.636783719 -2.436913490 -13.610940933  
H 1.231531978 -4.541191101 -10.499708176  
H -0.265021324 -4.057566166 -9.694590569  
H -0.323663980 -5.112985134 -11.125607491  
Na 0.130073234 -0.171467975 -12.421382904  
Na 2.881377935 -0.289516240 -10.919103622  
Na -0.108697236 -0.196072251 -9.295036316  
Na 1.110681653 2.149137259 -10.999530792  
C 3.654387474 -2.377335072 -9.531870842  
C 4.714010239 -1.620522618 -8.981367111  
C 3.952792406 -3.226316214 -10.618583679  
C 6.002961636 -1.693404317 -9.510279655  
C 5.247520447 -3.308574200 -11.127870560  
C 6.282023430 -2.537954569 -10.587682724  
H 4.516121387 -0.989882529 -8.120444298  
H 3.165215969 -3.844755411 -11.030913353  
H 6.796664238 -1.100216150 -9.061473846  
H 5.451382160 -3.991428375 -11.949186325  
H 7.289542675 -2.608675718 -10.988253593

=====

3N

=====  
C 4.211751938 -3.007347822 -7.414809704  
C 4.983769894 -3.903025389 -8.199882507  
C 5.359065056 -3.527595043 -9.496728897  
C 4.952768803 -2.323413134 -10.064398766  
C 4.170999050 -1.465880036 -9.285219193  
C 3.810393333 -1.758491755 -7.964312077  
C 4.128156662 -3.303179502 -5.932307243  
C 3.155958891 -4.147412777 -5.300702095  
C 3.412889481 -4.598218918 -3.976498127  
C 4.527907848 -4.087141991 -3.289602518  
C 5.403471470 -3.155960321 -3.841264963  
C 5.239302635 -2.815911770 -5.196281433  
H 5.963356018 -4.204102993 -10.093490601  
H 3.846484423 -0.525243461 -9.716155052  
P 1.596191525 -4.702601433 -6.221796036  
C 0.156501934 -4.879312992 -4.993663788  
C -1.219025254 -4.888147831 -5.708664417  
C -2.326991796 -5.247869492 -4.701474667  
C -2.352410555 -4.263374329 -3.522491693  
C -0.974713743 -4.172733307 -2.848279476  
C 0.124649055 -3.823531866 -3.865834475  
H 0.277569205 -5.875942707 -4.550884247  
H -1.234338522 -5.592917919 -6.542662621  
H -1.408228040 -3.891905308 -6.119124413  
H -3.296919584 -5.255431175 -5.214178562  
H -2.164116859 -6.269283295 -4.324596405  
H -2.629816055 -3.268690109 -3.896644831  
H -0.989368200 -3.418446064 -2.052110195  
H -0.738072455 -5.134171486 -2.366137028  
H 1.086223125 -3.734910488 -3.359684944  
H -0.079700619 -2.849529982 -4.317333221  
H -3.118610144 -4.557809353 -2.794314861  
C 1.990202427 -6.462318897 -6.808174133  
C 0.729162157 -7.242379189 -7.239000797  
C 1.117897511 -8.532670975 -7.980367184  
C 2.005602598 -9.431719780 -7.108366489  
C 3.233501911 -8.660754204 -6.602184772  
C 2.832047701 -7.361117840 -5.878101349  
H 2.578109264 -6.263515472 -7.711010933  
H 0.098174877 -6.634701252 -7.885762215  
H 0.141002715 -7.500287533 -6.347486496  
H 0.211003408 -9.068387032 -8.286456108  
H 1.648563027 -8.260770798 -8.903459549  
H 1.421288371 -9.786574364 -6.246591568  
H 3.829981804 -9.286868095 -5.926654339  
H 3.877364397 -8.413572311 -7.454559326  
H 3.725249529 -6.840871811 -5.520244122  
H 2.242395163 -7.627667427 -4.993474960  
H 2.318341732 -10.323782921 -7.664800167  
Pd 0.779479325 -3.311028004 -7.883533478  
Cl -0.185441464 -1.534673214 -6.423047543  
C 1.022221804 -4.668045044 -9.338406563  
C 2.228313446 -4.915776730 -9.996701241  
C -0.160098299 -5.206757545 -9.873291016  
C 2.262255907 -5.686104298 -11.166289330  
C -0.126863390 -5.977135658 -11.040831566

C 1.085695982 -6.222516060 -11.692825317  
H 3.143941641 -4.489205360 -9.615974426  
H -1.116055608 -5.026009560 -9.385720253  
H 3.214926720 -5.860025883 -11.662664413  
H -1.051941514 -6.387095451 -11.440207481  
H 1.109187245 -6.821695805 -12.599018097  
C 3.042566776 -0.706951022 -7.157605648  
H 2.375765800 -1.235328794 -6.472430229  
C 2.163115501 0.201363459 -8.035491943  
C 3.963588476 0.190096155 -6.303097725  
H 4.379963875 -0.346605480 -5.451771259  
H 4.788510323 0.599138260 -6.898553371  
H 3.384518862 1.031266928 -5.906702042  
H 2.766410589 0.919149637 -8.606483459  
H 1.483304143 0.767267764 -7.394055843  
H 1.543114305 -0.373919874 -8.722536087  
C 5.314058781 -1.981724739 -11.502449036  
H 5.979804039 -2.775249720 -11.868205070  
C 6.072669983 -0.647828281 -11.612494469  
C 4.060937405 -1.977529526 -12.399384499  
H 3.510653019 -2.920827866 -12.316500664  
H 3.384278774 -1.164632201 -12.111718178  
H 4.332093716 -1.826163411 -13.450407982  
H 5.449107170 0.191207230 -11.284342766  
H 6.368240356 -0.454724461 -12.649908066  
H 6.975604534 -0.654652119 -10.993825912  
C 5.454321384 -5.262034416 -7.672929287  
H 4.803466797 -5.540021420 -6.841262817  
C 6.894527912 -5.198359966 -7.127028465  
C 5.356600285 -6.382975578 -8.725853920  
H 4.357180119 -6.452991486 -9.163601875  
H 6.071029663 -6.240067482 -9.543184280  
H 5.595986843 -7.345879078 -8.263364792  
H 7.581129074 -4.820262909 -7.893039227  
H 7.236038685 -6.196545601 -6.829349041  
H 6.962847710 -4.546731949 -6.255156517  
C 6.339326859 -1.971442699 -5.818408966  
H 6.442288876 -1.012021303 -5.302227497  
H 7.308001995 -2.476806879 -5.729003429  
H 6.171003342 -1.760375023 -6.870751858  
C 6.524672985 -2.576187372 -3.013423204  
H 6.385753155 -2.807569027 -1.956824183  
H 7.503453255 -2.960225821 -3.328725815  
H 6.565635204 -1.487442255 -3.120359898  
C 2.649691105 -5.641688824 -3.182834625  
H 1.784996867 -6.037871361 -3.693533421  
H 3.306988716 -6.488509655 -2.963232517  
H 2.330585718 -5.238436222 -2.218544722  
O 4.732576370 -4.527782440 -1.989279747  
C 5.721082687 -5.551771641 -1.866546512  
H 5.470503807 -6.429714680 -2.477154493  
H 6.715966225 -5.196309090 -2.163707733  
H 5.742799759 -5.840456486 -0.813089907  
C -1.398072124 -1.742107034 -9.647910118  
O 0.021969266 -1.980561137 -9.567512512  
C 0.636672020 -2.009878635 -10.871005058  
C -1.639428139 -0.434539318 -10.387253761  
H -1.749671817 -1.687840223 -8.616019249

H -1.869747996 -2.583547831 -10.176138878  
 C 0.353683740 -0.695276260 -11.583284378  
 H 1.702973723 -2.156047583 -10.697736740  
 H 0.245066583 -2.861277103 -11.441668510  
 O -1.046446919 -0.460937411 -11.683222771  
 H -2.712387562 -0.269910425 -10.528628349  
 H -1.227284193 0.395402700 -9.790895462  
 H 0.749647439 -0.728034079 -12.603541374  
 H 0.843576431 0.129353121 -11.039044380

## 6.2. Vibrational frequencies (in $\text{cm}^{-1}$ ) of the optimized geometries

PhCl

189.80 300.67 416.25 418.68 479.57 626.00  
 698.33 710.51 756.14 844.86 917.67 972.78  
 998.77 1012.13 1049.15 1107.52 1108.38 1195.35  
 1210.89 1330.33 1354.44 1486.03 1520.33 1640.62  
 1640.82 3184.36 3193.91 3206.43 3216.06 3218.88

NH<sub>3</sub>

1095.37 1692.51 1692.70 3460.41 3588.78 3589.29

NH<sub>2</sub>Ph

223.84 287.30 392.79 418.01 508.38 537.29  
 634.43 635.12 704.34 764.23 828.03 835.37  
 881.56 955.33 980.02 1009.23 1057.05 1079.95  
 1147.56 1193.40 1214.51 1313.64 1368.47 1371.72  
 1513.80 1546.38 1644.59 1661.62 1679.92 3165.74  
 3167.36 3182.53 3188.44 3206.15 3559.45 3662.49

NHPh<sub>2</sub>

33.48 56.69 108.11 219.63 234.87 312.18  
 334.78 350.65 417.53 425.39 503.53 513.98  
 581.31 627.08 631.63 651.79 704.11 712.66  
 760.71 762.98 823.25 833.76 849.26 893.82  
 898.23 911.43 962.91 969.16 985.37 992.59  
 1009.54 1010.43 1058.19 1058.70 1114.15 1125.90  
 1194.66 1195.25 1214.82 1220.94 1260.28 1280.85  
 1355.26 1356.09 1371.59 1373.42 1460.44 1506.75  
 1538.31 1543.71 1566.55 1639.47 1645.83 1657.78  
 1670.77 3167.46 3168.58 3179.62 3180.16 3188.65  
 3189.38 3205.74 3206.74 3214.89 3220.66 3636.99

NaO'Bu

47.86 48.67 233.81 286.67 287.81 329.97  
 346.94 347.21 478.87 479.24 518.60 760.27  
 881.85 883.13 947.24 1038.92 1039.32 1059.35  
 1236.42 1237.93 1266.65 1387.57 1387.94 1413.05  
 1482.20 1492.25 1492.67 1505.21 1505.42 1526.54  
 3013.73 3014.25 3024.76 3085.19 3085.87 3094.12  
 3097.62 3101.17 3103.00

(NaO'Bu)<sub>4</sub>

21.02 23.04 26.35 27.34 31.48 36.11  
 39.65 40.42 53.61 63.50 66.78 67.79  
 108.15 108.32 108.54 141.81 142.34 147.87  
 207.72 207.94 208.16 223.52 223.75 224.06  
 224.39 224.85 250.60 250.77 250.99 258.90  
 270.51 271.20 276.94 293.93 320.11 320.40  
 320.75 320.96 324.67 325.24 335.72 335.89  
 365.34 366.13 366.47 369.20 369.69 371.76  
 373.48 374.30 454.44 454.62 455.10 457.64  
 494.84 494.97 495.48 498.18 498.26 501.66  
 502.24 502.39 742.97 747.80 749.66 751.46  
 885.04 886.23 887.63 888.05 888.38 888.90  
 888.96 889.09 951.61 951.91 953.03 957.37  
 1005.96 1006.29 1007.18 1016.68 1042.64 1042.76  
 1042.95 1043.05 1043.11 1043.47 1043.95 1044.38  
 1236.60 1237.40 1237.93 1238.36 1238.98 1241.82  
 1241.94 1242.57 1243.30 1243.64 1243.91 1260.61  
 1389.15 1389.28 1389.45 1389.77 1389.84 1390.06  
 1390.47 1391.05 1414.43 1414.51 1415.05 1416.27  
 1487.24 1487.59 1487.88 1488.92 1495.33 1495.44  
 1495.80 1496.07 1496.60 1496.89 1497.87 1497.91  
 1509.72 1509.79 1509.96 1510.57 1510.66 1510.79  
 1511.23 1511.41 1526.26 1526.59 1527.09 1528.53  
 2982.66 2984.58 2993.73 2998.50 2999.22 3002.47  
 3002.87 3003.11 3003.37 3008.97 3012.89 3013.11  
 3044.24 3050.57 3052.08 3062.86 3068.03 3068.41  
 3069.25 3070.13 3074.01 3074.49 3074.68 3075.20  
 3079.97 3080.52 3083.17 3083.48 3085.62 3086.02  
 3086.16 3086.46 3092.28 3095.36 3097.33 3098.16

Na<sub>4</sub>(O'Bu)<sub>3</sub>Cl

13.54 15.87 18.84 30.39 31.99 38.97  
 56.26 60.52 76.25 99.49 101.34 114.97  
 135.14 136.24 157.33 175.34 178.21 213.92  
 216.66 217.70 220.46 225.93 228.13 238.78  
 246.64 248.86 251.62 251.99 253.51 255.27  
 300.53 303.24 303.87 305.58 307.14 310.35  
 363.73 364.57 365.35 368.72 369.70 370.29  
 453.77 454.34 456.66 496.73 496.75 498.46  
 502.56 503.74 504.32 751.70 752.86 753.77  
 889.49 890.23 890.59 893.10 893.20 893.69  
 949.17 949.61 950.04 997.65 998.21 1006.41  
 1041.61 1041.88 1042.30 1042.52 1042.94 1043.13  
 1232.66 1233.09 1241.12 1242.25 1243.02 1243.46  
 1244.10 1244.58 1249.80 1393.60 1394.23 1395.41  
 1395.80 1396.59 1397.80 1419.82 1420.82 1422.42  
 1484.82 1486.07 1486.49 1487.00 1487.28 1488.25  
 1489.89 1490.07 1491.12 1507.84 1508.49 1508.67  
 1509.04 1510.10 1510.62 1516.69 1519.54 1521.08  
 3003.47 3006.03 3009.52 3011.62 3012.09 3012.24  
 3020.06 3021.28 3021.61 3070.59 3073.32 3075.56  
 3078.36 3079.49 3080.28 3082.27 3083.29 3083.81  
 3093.77 3095.03 3096.04 3098.64 3099.89 3100.77  
 3106.41 3107.63 3109.70

|                                          |         |         |         |         |         |         |         |         |         |         |         |         |
|------------------------------------------|---------|---------|---------|---------|---------|---------|---------|---------|---------|---------|---------|---------|
| =====                                    |         |         |         |         |         |         | 1362.07 | 1365.83 | 1367.53 | 1369.52 | 1380.34 | 1381.03 |
| HO'Bu                                    |         |         |         |         |         |         | 1387.09 | 1391.63 | 1395.10 | 1396.08 | 1396.94 | 1401.27 |
| =====                                    |         |         |         |         |         |         | 1403.60 | 1404.87 | 1413.35 | 1414.83 | 1416.36 | 1433.50 |
| 217.73                                   | 277.46  | 284.01  | 312.36  | 347.34  | 348.97  | 1435.24 | 1436.92 | 1466.19 | 1467.04 | 1478.25 | 1492.56 |         |
| 423.22                                   | 470.42  | 471.65  | 756.12  | 916.90  | 931.22  | 1494.72 | 1497.93 | 1498.28 | 1499.10 | 1500.87 | 1501.35 |         |
| 944.29                                   | 968.96  | 1036.82 | 1054.53 | 1170.25 | 1251.70 | 1503.44 | 1503.70 | 1504.76 | 1505.89 | 1506.42 | 1506.50 |         |
| 1267.33                                  | 1377.04 | 1412.83 | 1419.62 | 1440.36 | 1486.71 | 1508.27 | 1510.88 | 1512.45 | 1515.92 | 1517.05 | 1517.69 |         |
| 1496.70                                  | 1500.34 | 1512.37 | 1520.50 | 1534.99 | 3030.70 | 1518.92 | 1521.08 | 1522.84 | 1523.48 | 1527.85 | 1531.00 |         |
| 3035.84                                  | 3051.34 | 3098.48 | 3105.62 | 3124.74 | 3124.86 | 1603.58 | 1612.85 | 1618.65 | 1624.94 | 1641.83 | 1660.18 |         |
| 3132.22                                  | 3132.47 | 3799.71 |         |         |         | 3001.34 | 3010.35 | 3012.02 | 3014.08 | 3015.30 | 3015.77 |         |
| =====                                    |         |         |         |         |         |         | 3022.14 | 3027.44 | 3030.18 | 3032.12 | 3034.40 | 3035.16 |
| NaCl                                     |         |         |         |         |         |         | 3036.20 | 3039.11 | 3041.38 | 3041.87 | 3057.43 | 3063.25 |
| =====                                    |         |         |         |         |         |         | 3065.22 | 3069.79 | 3071.48 | 3073.88 | 3075.21 | 3077.60 |
| 355.69                                   |         |         |         |         |         | 3080.73 | 3082.80 | 3092.75 | 3098.00 | 3103.29 | 3103.75 |         |
| =====                                    |         |         |         |         |         |         | 3105.82 | 3108.58 | 3108.91 | 3111.64 | 3112.56 | 3113.72 |
| 1,4-dioxane                              |         |         |         |         |         |         | 3118.70 | 3121.29 | 3124.87 | 3126.20 | 3134.51 | 3135.94 |
| =====                                    |         |         |         |         |         |         | 3140.92 | 3165.49 | 3173.76 | 3174.87 | 3179.03 | 3184.00 |
| 251.21                                   | 280.95  | 424.74  | 447.34  | 488.80  | 618.95  | 3193.44 | 3195.00 | 3200.50 | 3206.43 | 3209.60 | 3221.72 |         |
| 853.37                                   | 874.25  | 895.17  | 899.63  | 1024.57 | 1072.09 | =====   |         |         |         |         |         |         |
| 1117.12                                  | 1143.02 | 1150.64 | 1153.82 | 1245.16 | 1287.48 | L1_10   |         |         |         |         |         |         |
| 1326.47                                  | 1335.78 | 1365.38 | 1405.47 | 1420.52 | 1437.49 | =====   |         |         |         |         |         |         |
| 1491.63                                  | 1494.18 | 1507.20 | 1512.77 | 2974.84 | 2982.49 | 20.66   | 25.79   | 33.80   | 37.15   | 40.56   | 46.28   |         |
| 2986.33                                  | 2993.17 | 3092.36 | 3094.20 | 3096.35 | 3099.60 | 51.98   | 57.74   | 58.76   | 67.16   | 71.84   | 76.84   |         |
| =====                                    |         |         |         |         |         |         | 79.95   | 84.41   | 88.46   | 90.83   | 99.36   | 104.14  |
| Ligand(L1, L2, L3, L4)_ (dihedral angle) |         |         |         |         |         |         | 109.28  | 112.31  | 136.27  | 137.45  | 142.49  | 153.93  |
| =====                                    |         |         |         |         |         |         | 160.46  | 173.15  | 178.13  | 187.76  | 202.23  | 204.82  |
| L1_0                                     |         |         |         |         |         |         | 208.28  | 214.54  | 225.40  | 241.58  | 246.34  | 252.23  |
| =====                                    |         |         |         |         |         |         | 258.81  | 262.20  | 262.81  | 263.24  | 270.44  | 276.42  |
| 19.53                                    | 25.49   | 33.46   | 36.38   | 40.55   | 47.94   | 276.72  | 285.97  | 289.24  | 291.85  | 309.33  | 321.02  |         |
| 51.79                                    | 58.28   | 59.65   | 68.31   | 73.06   | 79.30   | 325.55  | 336.13  | 339.45  | 363.83  | 377.69  | 387.52  |         |
| 82.72                                    | 88.43   | 90.50   | 91.77   | 99.08   | 105.99  | 396.23  | 415.47  | 420.69  | 435.62  | 450.04  | 451.10  |         |
| 109.20                                   | 112.47  | 135.66  | 138.70  | 144.10  | 155.61  | 453.62  | 466.87  | 479.66  | 484.82  | 489.69  | 495.55  |         |
| 164.77                                   | 175.25  | 179.35  | 188.55  | 201.83  | 206.28  | 508.68  | 526.34  | 535.29  | 541.17  | 563.48  | 586.84  |         |
| 209.21                                   | 214.65  | 224.58  | 242.64  | 246.60  | 252.18  | 611.32  | 623.23  | 637.27  | 648.86  | 664.10  | 672.79  |         |
| 259.60                                   | 261.75  | 263.37  | 264.50  | 270.35  | 278.24  | 682.86  | 708.15  | 730.33  | 747.22  | 749.48  | 754.59  |         |
| 279.66                                   | 286.19  | 290.83  | 293.34  | 310.50  | 320.18  | 767.54  | 778.18  | 783.86  | 807.13  | 816.51  | 828.39  |         |
| 325.66                                   | 336.06  | 339.75  | 364.14  | 377.29  | 389.89  | 828.93  | 833.37  | 848.55  | 856.43  | 868.31  | 872.53  |         |
| 396.49                                   | 415.92  | 422.08  | 436.80  | 450.32  | 451.44  | 893.39  | 895.05  | 902.27  | 903.40  | 906.18  | 907.65  |         |
| 454.37                                   | 468.68  | 479.74  | 485.17  | 491.88  | 494.87  | 913.09  | 914.21  | 920.12  | 941.12  | 944.20  | 945.22  |         |
| 509.55                                   | 527.20  | 537.51  | 541.33  | 564.20  | 584.76  | 948.25  | 949.20  | 957.83  | 962.33  | 971.24  | 973.89  |         |
| 611.57                                   | 623.47  | 637.31  | 648.80  | 663.29  | 672.47  | 975.16  | 975.94  | 976.50  | 989.92  | 1000.66 | 1009.88 |         |
| 683.15                                   | 708.55  | 731.36  | 748.00  | 750.08  | 754.84  | 1020.48 | 1024.53 | 1030.04 | 1042.15 | 1047.46 | 1049.36 |         |
| 768.96                                   | 777.39  | 785.40  | 808.31  | 817.66  | 827.98  | 1062.18 | 1065.79 | 1070.27 | 1083.27 | 1090.13 | 1093.85 |         |
| 829.70                                   | 834.06  | 847.97  | 856.37  | 868.81  | 872.89  | 1098.72 | 1100.80 | 1102.54 | 1105.81 | 1108.37 | 1112.58 |         |
| 894.27                                   | 896.30  | 902.27  | 903.54  | 906.02  | 908.08  | 1128.29 | 1130.47 | 1133.55 | 1137.59 | 1139.20 | 1150.97 |         |
| 912.99                                   | 914.17  | 920.48  | 941.70  | 944.61  | 945.28  | 1156.21 | 1163.83 | 1190.61 | 1191.81 | 1202.86 | 1203.26 |         |
| 948.12                                   | 949.03  | 957.57  | 963.35  | 973.10  | 973.63  | 1209.90 | 1210.33 | 1215.62 | 1218.24 | 1234.69 | 1246.33 |         |
| 975.24                                   | 976.31  | 976.84  | 990.05  | 1001.20 | 1009.88 | 1262.31 | 1288.80 | 1289.55 | 1295.31 | 1296.51 | 1300.91 |         |
| 1020.67                                  | 1024.92 | 1030.54 | 1041.89 | 1047.49 | 1049.45 | 1307.87 | 1309.10 | 1314.19 | 1315.94 | 1319.14 | 1322.85 |         |
| 1060.68                                  | 1065.23 | 1070.16 | 1082.99 | 1090.35 | 1093.53 | 1334.46 | 1341.94 | 1342.87 | 1344.00 | 1346.15 | 1349.78 |         |
| 1098.95                                  | 1100.24 | 1101.92 | 1106.22 | 1108.24 | 1113.24 | 1361.93 | 1365.13 | 1367.95 | 1369.61 | 1379.95 | 1380.76 |         |
| 1128.67                                  | 1130.45 | 1134.27 | 1137.86 | 1139.38 | 1151.26 | 1385.94 | 1391.35 | 1394.94 | 1395.91 | 1396.72 | 1401.29 |         |
| 1155.78                                  | 1163.26 | 1190.19 | 1191.58 | 1201.98 | 1202.97 | 1403.47 | 1404.51 | 1413.68 | 1415.05 | 1416.64 | 1433.86 |         |
| 1209.33                                  | 1210.06 | 1215.52 | 1218.52 | 1234.28 | 1245.96 | 1435.45 | 1436.90 | 1467.43 | 1468.10 | 1478.37 | 1492.17 |         |
| 1262.38                                  | 1287.67 | 1291.39 | 1295.21 | 1296.72 | 1301.06 | 1493.67 | 1497.36 | 1498.10 | 1499.15 | 1500.90 | 1501.58 |         |
| 1307.05                                  | 1309.08 | 1314.02 | 1317.45 | 1319.69 | 1322.77 | 1503.43 | 1503.75 | 1504.72 | 1505.64 | 1506.09 | 1506.43 |         |
| 1334.32                                  | 1340.47 | 1342.38 | 1343.26 | 1345.53 | 1350.15 | 1508.57 | 1509.89 | 1512.62 | 1515.80 | 1516.94 | 1517.25 |         |
|                                          |         |         |         |         |         | 1518.03 | 1520.73 | 1522.31 | 1523.32 | 1527.47 | 1530.44 |         |

1602.78 1614.03 1619.26 1625.03 1643.39 1659.56  
3003.46 3009.63 3012.46 3014.28 3015.33 3015.89  
3021.76 3028.37 3030.24 3030.40 3034.52 3034.90  
3035.07 3039.37 3039.61 3040.54 3057.22 3061.26  
3065.83 3069.35 3071.51 3073.14 3075.39 3077.71  
3081.48 3084.47 3089.93 3098.16 3101.19 3103.86  
3105.80 3107.99 3108.94 3111.49 3111.75 3117.15  
3118.78 3119.55 3122.12 3129.05 3132.33 3140.34  
3141.90 3165.52 3173.56 3176.34 3180.13 3183.90  
3193.52 3194.66 3196.70 3205.56 3207.04 3219.76

=====  
L1\_20  
=====

20.69 28.72 33.72 37.69 41.23 46.01  
52.04 58.45 58.95 66.35 72.85 73.33  
77.63 82.27 86.58 91.29 99.73 102.82  
109.10 112.38 133.23 137.35 140.25 152.06  
158.79 170.81 176.96 187.49 201.93 204.73  
207.38 215.69 225.93 240.88 245.46 252.26  
254.88 261.49 262.08 262.79 271.77 272.94  
273.21 281.63 289.48 291.53 308.38 320.69  
325.96 335.96 338.55 363.46 378.96 385.24  
396.84 414.92 420.12 434.42 449.75 450.41  
453.34 464.96 479.70 484.44 488.50 495.96  
508.37 525.05 533.58 542.11 562.30 589.45  
611.03 623.09 637.65 649.39 664.61 672.04  
680.56 707.99 729.20 746.70 748.66 754.09  
767.31 779.09 782.92 806.18 815.48 828.34  
828.50 833.36 848.63 856.64 867.76 871.99  
891.41 895.56 902.11 904.03 906.20 907.79  
912.87 913.67 921.11 940.55 943.34 945.33  
948.57 949.20 958.04 961.56 969.83 973.88  
975.48 975.92 976.14 989.25 999.44 1009.49  
1019.68 1024.07 1029.68 1041.05 1047.26 1049.23  
1063.67 1065.57 1070.87 1083.06 1090.02 1094.08  
1098.55 1099.49 1102.99 1105.31 1108.09 1112.43  
1127.98 1130.91 1132.90 1137.65 1139.39 1150.85  
1156.62 1163.96 1191.01 1191.46 1202.75 1203.40  
1209.94 1210.55 1215.71 1217.87 1235.23 1247.22  
1261.77 1287.26 1290.25 1295.64 1297.03 1301.11  
1308.56 1309.19 1313.27 1314.61 1317.58 1323.14  
1335.56 1342.73 1344.47 1345.04 1345.47 1349.72  
1361.66 1364.07 1368.23 1369.94 1378.47 1380.48  
1386.00 1390.80 1394.81 1395.72 1396.83 1401.26  
1403.31 1404.03 1414.39 1415.30 1416.87 1434.51  
1436.23 1437.03 1466.28 1468.18 1478.98 1491.82  
1493.30 1496.84 1498.07 1499.04 1500.81 1501.58  
1503.23 1504.15 1504.59 1504.76 1506.00 1506.46  
1508.23 1509.28 1512.46 1515.27 1516.47 1516.86  
1517.93 1520.63 1521.85 1523.04 1527.75 1529.60  
1601.82 1615.00 1617.70 1623.00 1642.54 1659.10  
3006.09 3009.14 3010.86 3014.42 3014.99 3016.32  
3021.98 3029.16 3029.64 3031.52 3034.54 3034.91  
3036.07 3039.08 3040.82 3043.08 3056.41 3061.24  
3066.02 3069.69 3071.94 3072.99 3075.49 3078.06  
3080.79 3087.33 3088.26 3097.99 3102.68 3105.10  
3105.11 3108.28 3108.92 3111.84 3112.73 3116.91  
3118.48 3119.33 3121.41 3129.13 3131.20 3142.13

3147.29 3165.63 3173.20 3178.64 3183.87 3186.16  
3189.56 3194.17 3195.95 3205.25 3206.79 3218.91

=====  
L1\_30  
=====

19.76 25.30 39.63 43.49 45.43 50.56  
55.22 60.00 64.16 66.54 72.09 74.43  
80.77 84.03 88.69 93.36 99.71 103.96  
109.37 117.60 125.38 136.42 140.86 147.90  
162.56 171.34 177.15 185.43 191.66 206.01  
206.60 219.63 224.48 239.30 246.59 253.21  
253.85 258.13 263.52 265.03 266.49 269.36  
276.08 281.64 290.52 296.67 305.86 318.14  
331.71 336.49 339.79 363.58 379.85 384.03  
395.78 412.59 415.74 427.73 447.60 450.16  
451.95 475.73 479.33 485.07 489.28 495.48  
506.98 522.23 532.90 543.12 560.22 591.19  
608.99 622.52 637.51 648.82 665.03 672.67  
679.05 707.44 722.62 747.45 749.03 758.00  
771.53 779.78 784.48 807.46 811.78 826.87  
830.41 832.58 847.14 857.02 866.05 869.83  
895.79 895.88 900.55 904.07 906.87 908.67  
911.14 913.91 922.25 938.71 942.96 944.99  
947.77 950.04 957.58 962.04 972.21 972.65  
975.07 975.96 976.56 988.87 1000.59 1009.35  
1019.45 1024.01 1028.25 1040.96 1044.44 1048.43  
1065.43 1069.19 1070.12 1083.59 1088.67 1095.84  
1097.02 1099.29 1103.52 1107.41 1108.05 1112.87  
1127.07 1129.90 1132.33 1137.44 1142.22 1148.34  
1156.13 1163.86 1191.23 1191.28 1203.26 1204.78  
1209.91 1210.70 1212.76 1217.68 1239.74 1245.23  
1263.30 1286.72 1290.24 1296.61 1299.08 1301.75  
1306.99 1308.47 1310.11 1313.94 1317.47 1321.29  
1330.73 1335.93 1344.72 1345.72 1346.73 1348.37  
1359.20 1361.32 1368.58 1370.82 1374.10 1382.87  
1388.09 1392.41 1393.39 1395.57 1397.63 1399.37  
1400.95 1401.57 1414.87 1416.16 1416.81 1435.52  
1436.46 1437.34 1466.41 1469.39 1477.84 1491.42  
1495.60 1496.76 1498.19 1498.84 1500.75 1501.76  
1503.41 1503.97 1504.56 1505.38 1505.98 1506.16  
1507.73 1508.43 1510.25 1514.92 1516.40 1516.96  
1517.40 1521.12 1523.00 1523.42 1524.79 1527.46  
1602.07 1614.74 1617.62 1622.04 1641.39 1658.55  
3008.70 3011.82 3016.64 3020.64 3026.14 3026.44  
3028.66 3031.94 3034.68 3034.80 3035.21 3038.21  
3039.06 3039.57 3039.87 3050.95 3056.03 3056.97  
3060.81 3068.17 3070.15 3071.84 3073.78 3075.36  
3077.77 3079.31 3079.61 3094.00 3098.11 3102.31  
3105.26 3105.97 3108.52 3109.91 3110.08 3111.58  
3113.66 3115.55 3120.40 3126.79 3130.13 3144.61  
3163.10 3165.63 3173.05 3179.08 3183.58 3188.76  
3192.15 3193.54 3200.84 3201.02 3210.44 3223.10

=====  
L1\_40  
=====

13.02 20.78 39.19 39.97 44.77 50.22  
55.64 59.54 65.02 66.28 71.52 74.03  
76.61 83.14 88.21 92.83 98.08 103.38

110.12 118.32 123.06 136.82 140.06 147.39  
162.84 170.59 176.16 184.77 190.84 204.55  
205.72 219.27 224.12 237.88 246.61 252.89  
253.58 258.74 263.90 266.04 267.28 269.56  
276.12 285.20 290.02 300.60 304.32 317.34  
332.45 337.09 339.07 362.06 380.29 385.05  
398.18 410.15 415.25 427.69 447.20 449.81  
451.85 475.52 477.48 483.58 488.79 494.61  
508.49 522.00 532.91 545.47 558.17 592.21  
609.11 622.19 637.48 646.48 664.41 673.01  
681.07 706.45 725.23 747.00 747.59 759.12  
770.62 777.99 785.18 807.31 812.15 826.11  
830.50 832.43 845.74 857.50 866.39 870.26  
894.30 895.89 900.56 902.58 907.05 907.85  
910.74 913.87 923.07 938.67 943.18 945.49  
947.90 949.99 957.69 960.61 969.97 970.98  
974.99 976.15 977.02 988.74 998.70 1009.01  
1019.89 1023.82 1028.15 1040.48 1044.33 1048.62  
1064.60 1069.22 1070.04 1083.54 1088.20 1095.91  
1096.78 1098.79 1102.63 1106.94 1107.42 1113.70  
1127.53 1130.57 1131.96 1137.34 1141.96 1148.90  
1154.93 1163.33 1191.34 1191.43 1203.54 1204.44  
1209.23 1210.43 1212.36 1218.18 1238.79 1246.30  
1263.97 1284.09 1290.93 1296.78 1299.30 1301.64  
1306.86 1308.24 1309.58 1313.63 1317.21 1321.87  
1328.17 1335.37 1344.46 1345.98 1347.22 1348.41  
1359.61 1361.39 1368.64 1370.74 1373.29 1383.07  
1388.81 1392.71 1393.38 1395.87 1397.28 1399.44  
1400.93 1401.15 1414.65 1416.07 1416.82 1435.58  
1436.53 1437.24 1466.67 1469.06 1476.88 1490.55  
1495.58 1496.76 1498.24 1498.80 1500.85 1501.67  
1503.32 1503.96 1504.73 1505.46 1505.95 1506.00  
1507.22 1508.13 1510.36 1511.56 1516.58 1517.17  
1517.59 1521.21 1522.92 1523.37 1524.78 1527.62  
1603.59 1614.01 1617.31 1622.02 1639.74 1659.20  
3008.65 3011.51 3016.59 3020.90 3027.38 3028.08  
3029.67 3032.01 3034.35 3035.32 3035.46 3037.07  
3038.30 3039.69 3040.89 3052.20 3053.10 3056.73  
3062.13 3067.86 3070.44 3072.07 3073.82 3075.15  
3078.51 3080.75 3083.90 3092.87 3097.81 3102.72  
3105.54 3105.84 3110.13 3110.29 3111.75 3113.19  
3114.85 3115.36 3121.99 3125.00 3129.54 3142.53  
3159.65 3166.00 3173.42 3180.47 3181.89 3191.28  
3193.78 3199.45 3201.42 3202.88 3212.33 3220.77

L1\_50

11.06 20.94 40.30 43.38 46.88 54.31  
59.96 61.67 65.28 73.35 75.97 79.11  
81.11 87.65 95.97 99.69 101.78 108.08  
112.00 121.41 122.99 141.78 145.70 154.68  
164.67 172.67 178.79 188.91 195.18 205.17  
207.37 221.39 225.32 244.43 249.85 250.28  
253.91 259.78 266.76 271.15 272.53 276.20  
282.82 286.28 291.93 299.76 303.50 316.39  
334.94 338.80 341.53 361.70 380.71 390.01  
400.44 408.32 415.63 429.52 447.73 450.59  
454.37 474.45 477.23 483.74 489.90 494.59

509.19 523.20 533.03 545.64 558.71 593.55  
607.72 621.63 638.89 639.35 661.59 673.79  
682.13 705.20 724.39 746.58 747.51 759.67  
771.39 776.57 786.59 808.22 811.13 826.14  
829.34 831.76 844.53 857.40 866.52 869.80  
894.49 896.10 901.05 901.39 906.56 908.06  
910.53 913.10 923.99 939.98 943.79 945.70  
947.32 950.52 956.39 960.07 971.34 971.58  
974.68 976.17 976.64 988.16 999.97 1009.25  
1020.77 1022.98 1027.66 1040.98 1044.46 1048.32  
1064.83 1069.24 1070.84 1083.23 1087.45 1095.72  
1097.88 1098.73 1103.07 1106.85 1109.28 1114.88  
1125.65 1129.43 1131.61 1137.34 1142.98 1147.45  
1155.07 1164.65 1191.12 1192.10 1202.86 1205.01  
1208.77 1210.38 1213.15 1218.92 1240.89 1243.94  
1267.81 1282.35 1291.00 1297.15 1299.64 1302.46  
1307.56 1308.55 1309.24 1315.92 1316.95 1322.00  
1327.49 1336.70 1340.22 1343.92 1347.69 1349.60  
1357.80 1360.24 1369.39 1371.56 1373.09 1385.21  
1390.40 1393.48 1394.97 1395.62 1396.92 1398.13  
1400.34 1401.56 1415.15 1416.82 1417.47 1436.35  
1437.40 1439.99 1466.49 1469.40 1475.72 1489.87  
1496.92 1498.19 1499.50 1500.28 1501.13 1502.19  
1503.56 1504.50 1504.99 1505.49 1506.31 1507.68  
1508.12 1508.53 1511.24 1513.36 1518.34 1518.54  
1519.62 1522.20 1524.14 1524.77 1526.28 1530.26  
1605.77 1614.74 1617.03 1622.27 1640.37 1658.52  
3008.39 3010.63 3016.53 3021.07 3028.92 3029.35  
3031.29 3034.59 3035.66 3036.39 3037.76 3040.30  
3040.43 3042.06 3043.30 3051.74 3053.06 3061.72  
3068.56 3071.96 3072.14 3073.73 3076.24 3078.02  
3078.85 3081.97 3083.71 3091.92 3096.62 3100.83  
3104.98 3105.30 3105.99 3110.56 3111.66 3112.86  
3118.67 3122.03 3127.84 3132.18 3137.03 3139.87  
3161.36 3167.01 3174.48 3181.12 3181.59 3193.85  
3195.46 3205.63 3205.87 3214.93 3218.31 3225.53

L1\_60

12.11 18.09 40.85 46.15 47.35 56.05  
60.87 62.06 65.12 73.62 76.49 79.32  
90.14 93.21 97.09 103.09 104.58 110.78  
114.10 124.36 127.86 144.20 147.78 161.48  
164.96 177.08 180.43 193.11 198.43 204.52  
207.35 222.65 226.67 241.48 246.57 251.94  
253.85 256.56 266.23 274.24 276.28 280.44  
285.18 289.27 294.08 298.91 305.96 316.90  
334.95 338.60 345.67 360.22 379.59 396.18  
402.21 405.64 417.51 429.57 447.43 450.12  
455.26 472.80 477.10 484.52 489.45 495.00  
508.29 523.62 532.16 544.43 558.99 593.21  
604.39 622.40 630.62 641.60 663.11 673.29  
683.65 706.71 722.90 744.99 747.76 757.66  
771.76 776.59 789.11 808.10 808.73 824.68  
827.65 830.79 845.00 857.31 865.98 868.99  
895.26 896.00 901.20 905.22 906.38 908.12  
911.06 913.57 920.04 940.25 943.79 944.72  
947.07 949.60 955.09 959.80 971.36 971.99

974.09 976.65 977.23 988.40 1000.88 1009.19  
 1019.94 1021.71 1027.12 1040.77 1045.08 1048.13  
 1064.04 1068.53 1071.15 1082.85 1087.32 1095.07  
 1098.17 1099.78 1102.84 1107.11 1110.76 1115.27  
 1122.04 1129.08 1130.74 1136.96 1142.44 1146.40  
 1154.52 1164.78 1190.86 1191.10 1201.82 1205.07  
 1208.53 1210.14 1213.83 1218.56 1241.31 1243.21  
 1269.98 1275.97 1289.93 1297.17 1299.79 1302.52  
 1307.73 1308.17 1314.19 1317.90 1318.36 1321.60  
 1325.95 1337.02 1337.37 1343.99 1347.83 1348.29  
 1353.93 1360.92 1369.83 1371.73 1373.73 1386.08  
 1391.54 1393.49 1395.18 1395.94 1397.02 1397.51  
 1399.93 1402.31 1415.50 1415.62 1415.95 1434.95  
 1436.29 1442.65 1466.65 1469.65 1474.06 1488.08  
 1494.38 1497.78 1500.17 1501.00 1501.19 1501.76  
 1502.04 1503.50 1504.49 1505.58 1506.10 1507.27  
 1507.50 1509.21 1511.75 1513.65 1518.33 1518.66  
 1521.06 1522.57 1525.37 1525.82 1527.76 1529.60  
 1607.06 1615.21 1617.08 1622.55 1640.39 1654.56  
 3007.63 3009.97 3015.84 3020.44 3028.41 3028.61  
 3030.93 3034.97 3037.77 3038.20 3042.89 3043.66  
 3043.87 3044.73 3046.60 3051.08 3057.20 3065.30  
 3068.96 3072.07 3073.47 3074.42 3077.32 3079.47  
 3080.26 3085.56 3090.07 3095.24 3100.73 3103.03  
 3105.32 3106.76 3111.39 3111.86 3112.78 3121.97  
 3124.72 3131.84 3133.21 3137.28 3137.42 3147.91  
 3158.61 3167.66 3175.21 3182.38 3188.92 3196.20  
 3196.67 3208.17 3210.12 3228.02 3228.37 3230.44

=====  
 L1\_70  
 =====

13.26 30.36 34.91 38.15 45.19 46.15  
 51.55 55.25 58.44 67.41 70.26 74.15  
 75.51 80.03 93.53 99.63 102.00 106.29  
 109.95 113.34 117.05 141.10 146.37 153.46  
 161.91 169.14 184.02 193.14 195.17 200.63  
 202.62 209.28 222.74 238.36 246.82 249.85  
 251.99 263.32 266.75 269.88 273.82 276.90  
 284.58 295.95 300.30 309.49 314.64 316.55  
 322.69 342.69 346.68 359.08 379.02 390.33  
 401.72 409.47 411.60 436.49 440.03 449.74  
 452.85 462.68 478.31 484.39 495.34 500.90  
 514.28 527.42 534.26 554.01 560.22 583.77  
 607.30 619.00 638.49 653.86 664.83 671.94  
 677.82 697.61 726.32 741.08 745.06 752.34  
 767.09 779.62 796.58 813.01 815.84 822.67  
 830.28 831.21 833.28 854.46 864.58 870.84  
 894.33 894.56 902.72 903.83 905.19 905.54  
 909.16 914.08 915.27 938.81 942.09 943.05  
 944.78 946.56 953.51 959.84 964.53 968.15  
 973.14 975.31 978.08 985.33 998.60 1006.00  
 1015.87 1025.49 1027.99 1039.62 1041.49 1044.26  
 1049.65 1069.55 1070.85 1082.86 1085.35 1091.49  
 1093.35 1095.94 1098.64 1106.20 1107.86 1109.28  
 1122.27 1128.42 1130.69 1135.05 1141.74 1149.17  
 1160.17 1163.69 1189.33 1191.74 1203.50 1204.14  
 1208.76 1209.72 1211.27 1218.80 1241.22 1265.79  
 1268.78 1285.02 1289.81 1294.17 1296.74 1298.66

1299.35 1303.53 1310.56 1313.05 1315.67 1318.47  
 1329.71 1331.85 1335.40 1340.99 1345.03 1345.27  
 1352.97 1357.65 1367.62 1369.90 1378.53 1379.46  
 1383.02 1386.04 1394.10 1394.14 1395.89 1396.47  
 1397.68 1398.39 1413.25 1415.68 1417.40 1436.06  
 1437.02 1438.89 1466.96 1467.33 1474.93 1485.33  
 1489.72 1498.28 1498.57 1498.92 1499.59 1500.49  
 1500.64 1502.35 1504.77 1505.41 1505.99 1506.29  
 1506.67 1508.34 1511.26 1511.62 1517.88 1519.67  
 1521.00 1522.35 1524.73 1524.93 1525.16 1529.25  
 1606.78 1610.24 1615.05 1623.18 1634.83 1657.50  
 3015.08 3016.37 3018.14 3021.90 3022.72 3024.82  
 3027.48 3029.58 3031.89 3034.44 3034.88 3035.35  
 3038.14 3038.82 3039.22 3040.27 3040.72 3048.22  
 3064.00 3068.04 3069.99 3074.21 3074.62 3076.69  
 3077.27 3079.47 3082.75 3084.80 3094.12 3099.64  
 3103.01 3103.38 3106.55 3109.53 3112.77 3113.46  
 3116.31 3118.18 3132.35 3136.26 3136.95 3142.72  
 3146.24 3168.48 3177.45 3183.13 3189.73 3193.10  
 3193.29 3197.19 3200.45 3206.98 3214.99 3225.83

=====  
 L1\_80  
 =====

13.02 30.31 33.65 41.55 45.92 47.85  
 50.66 54.10 57.82 70.44 71.20 73.54  
 77.59 81.65 94.93 99.60 102.50 106.26  
 110.85 115.90 117.53 140.96 148.32 153.59  
 164.35 168.53 184.98 194.72 197.15 201.05  
 204.48 211.79 224.70 234.23 247.17 252.66  
 253.47 262.54 267.39 270.57 276.34 277.66  
 285.58 295.85 301.70 309.72 315.38 316.84  
 321.85 343.03 347.48 359.60 381.22 392.04  
 402.49 407.02 410.90 437.04 438.90 450.31  
 453.97 463.22 479.86 485.43 493.24 500.19  
 513.21 527.81 533.59 550.86 559.47 584.14  
 605.71 619.19 637.96 654.36 664.75 671.89  
 678.73 697.95 725.96 740.15 746.50 752.31  
 766.89 779.20 797.14 813.14 815.28 823.24  
 830.86 831.03 836.19 854.08 863.72 871.59  
 894.24 895.56 903.19 905.04 906.50 906.91  
 910.29 914.96 916.62 938.66 942.53 942.73  
 944.39 946.41 954.03 959.86 966.00 968.83  
 973.20 974.50 976.77 986.67 1000.23 1005.73  
 1016.55 1025.67 1027.50 1040.41 1040.74 1045.42  
 1050.30 1069.54 1072.51 1082.79 1084.62 1092.48  
 1093.73 1095.73 1097.97 1106.76 1107.31 1109.53  
 1120.73 1127.76 1130.23 1134.35 1140.50 1151.16  
 1159.93 1163.88 1189.04 1191.66 1202.92 1204.88  
 1208.51 1210.03 1212.41 1218.56 1239.35 1267.46  
 1268.84 1286.04 1288.44 1294.32 1297.09 1298.99  
 1299.43 1303.83 1311.21 1313.35 1315.92 1316.59  
 1327.91 1331.16 1332.61 1340.81 1341.92 1343.70  
 1352.17 1359.17 1367.36 1370.69 1378.03 1379.50  
 1383.15 1387.22 1394.28 1395.02 1396.18 1396.98  
 1397.88 1398.61 1413.95 1414.89 1417.48 1436.25  
 1437.00 1438.94 1466.25 1469.85 1474.85 1485.52  
 1489.48 1498.39 1498.61 1498.96 1499.49 1500.45  
 1500.74 1502.29 1504.36 1505.21 1505.70 1506.22



1506.51 1508.50 1510.95 1512.19 1517.82 1519.11  
1519.85 1522.97 1524.57 1525.43 1525.50 1530.08  
1607.41 1609.15 1613.04 1620.62 1638.32 1656.30  
3014.03 3016.79 3017.32 3021.70 3022.89 3028.27  
3031.04 3032.14 3034.69 3035.63 3036.24 3036.47  
3039.73 3040.21 3041.73 3043.98 3044.44 3048.30  
3061.75 3065.64 3069.48 3071.98 3072.93 3073.26  
3074.89 3081.51 3082.57 3087.20 3099.98 3100.58  
3102.77 3103.70 3106.22 3109.79 3110.94 3111.07  
3117.54 3121.42 3130.46 3133.83 3149.10 3151.65  
3163.57 3169.43 3172.13 3182.74 3187.96 3191.51  
3193.23 3195.05 3195.59 3205.21 3206.09 3223.21

L1\_90

18.54 26.68 31.18 33.83 37.70 44.72  
49.86 54.50 58.90 60.42 69.09 79.54  
83.23 85.48 87.91 94.88 98.47 102.90  
106.30 113.86 118.54 136.34 147.86 154.12  
160.60 169.46 184.25 184.90 196.78 197.85  
202.90 214.31 230.17 231.42 244.36 253.15  
259.54 263.36 266.49 269.41 270.93 272.61  
284.33 288.49 292.98 297.73 310.03 320.27  
330.49 339.17 340.66 360.11 378.63 387.94  
400.00 408.94 414.39 435.39 447.93 451.71  
457.09 457.73 476.70 484.01 487.02 497.60  
517.79 530.39 537.17 547.66 559.26 585.11  
606.98 619.83 639.64 653.78 658.13 669.38  
676.70 695.64 720.17 740.70 744.50 754.23  
763.92 777.57 796.99 808.82 812.64 823.12  
827.66 831.13 832.55 855.06 866.33 869.00  
893.76 895.99 902.01 903.37 904.35 906.41  
908.40 912.21 913.85 937.11 940.67 944.23  
945.72 946.70 954.68 960.67 965.25 968.68  
973.49 974.11 978.07 985.48 997.74 1007.15  
1016.43 1024.75 1026.29 1041.51 1043.03 1046.18  
1047.87 1066.69 1070.32 1081.58 1084.98 1092.93  
1095.05 1096.34 1099.28 1105.36 1109.43 1110.19  
1122.02 1129.57 1131.66 1135.34 1143.24 1149.30  
1153.18 1163.17 1189.35 1191.69 1203.39 1204.89  
1210.16 1210.57 1213.36 1219.11 1249.05 1251.84  
1265.62 1279.10 1286.66 1293.51 1295.91 1298.66  
1299.82 1304.94 1309.31 1316.67 1317.95 1318.53  
1320.63 1334.11 1336.41 1339.92 1344.46 1347.97  
1352.15 1362.53 1367.57 1368.23 1378.06 1379.05  
1383.60 1391.40 1393.63 1394.22 1395.19 1396.97  
1399.33 1402.48 1414.64 1416.16 1416.34 1435.58  
1438.39 1439.13 1465.89 1467.05 1475.53 1486.17  
1489.42 1494.67 1496.80 1498.92 1499.93 1500.18  
1501.23 1502.66 1503.67 1504.48 1505.16 1506.47  
1507.32 1508.02 1512.60 1513.14 1517.70 1519.41  
1520.52 1522.45 1522.88 1524.53 1525.72 1527.35  
1604.90 1611.72 1615.26 1623.58 1640.44 1659.18  
3005.61 3012.89 3016.34 3016.48 3016.75 3022.27  
3022.66 3031.30 3033.96 3034.14 3035.10 3037.81  
3039.22 3039.70 3040.19 3043.46 3048.03 3048.75  
3056.61 3061.33 3071.05 3073.35 3074.22 3078.07  
3078.35 3080.31 3091.09 3092.01 3103.32 3103.59

3104.82 3108.71 3110.76 3111.09 3111.96 3112.40  
3118.76 3118.82 3123.86 3128.47 3134.88 3143.52  
3144.32 3169.43 3179.04 3181.97 3185.79 3189.99  
3195.16 3197.39 3206.14 3222.32 3222.57 3240.77

L1\_100

18.97 26.49 30.26 32.34 36.23 45.05  
49.09 55.37 59.02 60.16 70.95 76.98  
79.71 85.70 87.36 94.38 98.62 102.35  
105.69 113.33 120.38 135.73 148.61 153.07  
160.69 171.25 183.45 186.14 197.71 198.59  
204.95 216.57 227.88 232.11 244.38 253.22  
258.80 262.90 265.08 268.06 271.30 273.25  
282.20 285.93 292.29 298.53 310.71 320.57  
330.46 339.56 341.76 360.25 378.16 388.67  
397.40 410.73 415.09 437.88 448.09 452.02  
456.58 458.44 477.52 484.85 486.03 498.26  
518.21 530.40 536.98 546.15 559.84 586.06  
606.66 619.60 640.11 654.25 658.78 669.75  
677.81 697.75 720.29 741.46 746.02 754.10  
763.50 779.07 798.39 808.76 811.78 822.80  
826.63 831.66 833.85 855.22 865.54 868.50  
894.52 897.66 902.44 903.58 904.19 906.99  
908.20 911.89 914.75 936.88 940.49 943.79  
945.78 946.24 954.70 961.07 966.13 969.82  
973.73 974.17 977.18 986.65 997.92 1007.19  
1016.80 1024.07 1025.86 1041.80 1043.24 1045.80  
1048.89 1065.78 1069.96 1082.32 1084.61 1092.60  
1094.41 1095.71 1099.23 1105.23 1109.09 1109.79  
1121.22 1129.37 1131.99 1135.21 1142.90 1149.58  
1153.07 1163.19 1189.34 1191.74 1202.69 1204.30  
1209.41 1210.01 1212.91 1219.07 1247.67 1250.17  
1267.59 1278.07 1286.62 1293.37 1295.73 1298.81  
1300.42 1304.57 1308.66 1316.52 1318.40 1318.93  
1319.72 1334.00 1335.37 1340.95 1344.06 1346.76  
1351.97 1362.67 1367.20 1368.14 1377.19 1378.85  
1383.07 1391.11 1393.29 1394.60 1394.66 1396.31  
1399.35 1402.54 1415.00 1416.23 1416.47 1435.65  
1438.48 1439.43 1466.36 1467.34 1476.26 1486.86  
1489.50 1494.00 1496.56 1498.68 1500.05 1500.31  
1501.08 1502.46 1503.45 1504.42 1504.54 1506.46  
1506.99 1508.01 1512.04 1512.96 1517.59 1518.23  
1520.59 1522.40 1522.60 1524.61 1525.45 1527.19  
1604.59 1611.16 1615.47 1623.52 1642.14 1659.65  
3006.44 3014.49 3016.03 3016.59 3017.95 3021.18  
3022.15 3031.30 3033.42 3033.82 3037.85 3038.25  
3039.74 3040.12 3041.17 3043.14 3047.84 3048.60  
3052.81 3059.70 3071.27 3073.17 3073.61 3077.76  
3080.24 3091.82 3092.65 3092.83 3103.36 3103.96  
3105.17 3110.44 3110.76 3110.90 3111.31 3112.44  
3118.85 3119.10 3122.72 3136.59 3141.50 3145.87  
3147.04 3169.73 3179.18 3182.72 3182.82 3189.87  
3196.19 3197.52 3207.20 3219.53 3227.88 3234.65

L1\_110

13.34 21.50 29.66 35.45 36.56 40.77

47.07 51.54 57.49 60.00 65.44 72.31  
79.19 79.64 82.85 85.25 99.15 103.28  
108.16 113.01 120.99 133.77 145.12 147.40  
166.18 172.14 181.61 191.96 195.03 203.82  
205.01 213.61 230.85 235.72 240.47 243.82  
254.70 257.27 264.54 268.76 269.60 273.67  
284.09 285.50 292.93 300.02 317.54 319.40  
332.26 338.74 345.73 362.19 377.87 386.72  
409.27 417.23 418.01 433.69 451.56 452.61  
456.52 462.20 472.03 482.40 483.68 499.50  
525.10 536.32 537.99 548.47 559.16 591.33  
605.58 618.92 639.30 652.41 663.39 670.40  
675.74 703.81 733.28 746.46 748.73 750.47  
766.78 784.76 797.98 811.39 818.96 823.06  
825.41 831.02 844.45 855.22 868.42 869.43  
894.68 900.79 902.10 902.69 903.16 911.97  
914.32 915.02 915.26 940.46 944.69 945.74  
946.88 947.34 953.57 959.53 973.44 974.01  
974.98 977.24 981.82 992.16 1003.72 1008.16  
1015.61 1024.41 1028.53 1040.56 1042.28 1046.23  
1052.07 1059.35 1071.25 1082.25 1085.69 1090.65  
1095.30 1099.00 1100.86 1104.11 1106.25 1115.30  
1127.03 1129.59 1131.10 1134.10 1142.17 1146.09  
1154.79 1162.12 1189.90 1193.56 1203.61 1204.02  
1205.20 1210.25 1215.75 1217.25 1235.34 1252.10  
1264.84 1283.16 1289.97 1293.95 1296.00 1300.62  
1302.66 1304.87 1306.60 1315.42 1318.06 1318.71  
1321.12 1334.56 1342.78 1346.08 1352.78 1353.28  
1355.16 1360.95 1365.78 1369.08 1379.02 1380.43  
1383.58 1390.68 1392.53 1395.30 1396.73 1399.36  
1401.52 1404.58 1415.44 1417.06 1417.45 1436.24  
1436.79 1440.33 1462.61 1467.13 1472.91 1493.03  
1495.96 1497.31 1497.92 1499.31 1499.57 1500.86  
1502.69 1503.56 1504.28 1505.02 1505.84 1506.99  
1509.73 1512.81 1514.41 1516.27 1517.36 1518.96  
1519.40 1522.18 1524.13 1525.05 1529.04 1530.79  
1605.67 1609.13 1617.08 1623.36 1638.41 1656.13  
3013.35 3016.78 3018.34 3022.38 3023.43 3031.15  
3035.03 3035.78 3036.16 3036.42 3038.83 3040.01  
3042.18 3047.21 3048.08 3054.60 3060.95 3065.52  
3069.20 3071.63 3072.28 3075.29 3077.97 3078.69  
3082.36 3093.53 3098.61 3102.26 3102.86 3104.51  
3107.72 3109.27 3109.41 3112.03 3114.61 3117.05  
3117.22 3120.05 3125.87 3126.44 3126.52 3131.32  
3169.85 3173.61 3178.58 3183.07 3185.37 3192.23  
3193.17 3196.94 3206.70 3214.29 3221.12 3221.79

L1\_120

=====  
16.51 20.68 29.35 32.59 36.51 41.35  
45.29 50.19 56.30 62.76 68.02 72.20  
80.50 83.73 86.16 89.61 101.09 105.05  
105.59 113.38 118.14 136.48 147.90 149.73  
166.12 171.05 182.72 189.50 193.48 203.43  
205.84 213.61 227.95 236.01 241.71 250.27  
254.56 260.45 261.56 270.07 273.24 276.88  
277.61 283.41 292.68 299.35 312.55 319.30  
335.64 336.40 342.17 359.72 380.81 386.26

410.21 416.05 417.85 435.63 444.81 451.34  
456.35 461.93 472.71 480.26 482.85 494.58  
525.13 535.83 539.99 549.16 553.12 587.47  
596.70 618.68 636.62 651.63 661.11 669.52  
675.91 703.90 731.32 745.05 748.17 755.82  
766.55 785.86 796.11 810.07 820.35 825.16  
826.18 827.53 845.37 851.73 869.05 871.07  
890.54 901.35 901.88 904.98 905.79 910.60  
913.18 914.82 915.14 940.09 944.78 946.46  
946.75 947.22 948.69 954.86 973.76 974.36  
974.61 974.93 985.77 991.56 1001.50 1006.58  
1008.76 1025.09 1028.05 1040.97 1042.81 1045.57  
1052.88 1061.61 1071.87 1082.49 1084.84 1091.39  
1094.11 1099.10 1100.67 1103.66 1105.79 1114.98  
1123.15 1129.10 1130.66 1134.19 1143.31 1147.13  
1154.75 1159.93 1187.23 1193.46 1202.07 1204.65  
1205.99 1210.19 1216.46 1216.90 1240.10 1251.05  
1262.31 1284.47 1285.34 1294.50 1297.05 1300.42  
1302.76 1305.79 1308.35 1314.31 1316.77 1318.37  
1320.37 1335.54 1341.59 1345.83 1346.21 1352.86  
1355.53 1358.87 1366.42 1369.11 1378.75 1379.37  
1384.25 1390.39 1393.01 1395.35 1396.30 1399.24  
1400.08 1402.39 1415.44 1416.53 1417.27 1436.01  
1436.46 1439.83 1462.40 1467.19 1473.29 1491.55  
1494.02 1497.25 1499.06 1499.67 1500.21 1501.03  
1502.29 1502.86 1504.10 1505.36 1505.88 1506.33  
1508.96 1512.62 1514.26 1515.42 1518.20 1518.63  
1520.70 1523.40 1523.78 1524.94 1526.43 1530.70  
1608.38 1610.74 1617.36 1623.73 1640.51 1657.42  
3013.26 3016.97 3017.92 3022.37 3023.06 3030.87  
3034.40 3035.59 3036.07 3038.61 3039.41 3040.02  
3041.23 3043.05 3047.95 3051.22 3056.87 3064.61  
3069.19 3070.68 3072.58 3075.04 3078.24 3080.54  
3082.73 3092.96 3095.13 3102.48 3103.61 3104.56  
3107.83 3108.69 3109.79 3113.73 3114.30 3116.41  
3117.07 3117.65 3120.57 3124.68 3132.97 3134.20  
3169.59 3178.21 3181.57 3182.02 3182.74 3184.43  
3191.82 3196.59 3201.29 3211.15 3213.59 3218.52

L1\_130

=====  
22.01 25.12 30.36 37.03 39.95 43.26  
47.38 53.86 57.67 61.25 70.53 73.77  
77.58 83.95 89.70 91.86 97.55 102.81  
111.68 116.63 127.10 138.35 148.96 153.93  
160.41 178.37 181.21 189.61 192.97 203.68  
206.74 217.64 226.79 242.04 247.71 249.69  
253.33 262.74 264.17 266.85 267.89 273.18  
280.23 285.01 292.12 302.16 312.78 320.68  
334.05 335.64 344.84 365.01 379.97 384.73  
394.21 416.38 425.90 436.82 447.68 452.05  
452.73 469.90 483.99 486.32 493.01 501.68  
510.67 533.63 535.11 551.75 559.55 587.20  
608.32 620.66 641.88 654.13 666.03 671.04  
672.27 699.90 731.50 747.69 751.21 754.27  
772.74 787.92 800.01 807.73 811.89 825.66  
828.60 831.95 837.05 856.82 866.34 868.98  
895.39 900.66 902.40 904.28 905.61 907.87

912.60 913.20 914.30 934.38 941.21 944.85  
 946.99 947.74 955.27 962.84 969.00 973.66  
 975.20 977.07 983.78 990.66 1004.14 1007.01  
 1019.38 1023.96 1029.26 1039.35 1045.58 1049.51  
 1057.01 1060.04 1065.08 1079.29 1086.34 1094.18  
 1096.61 1102.86 1103.64 1105.00 1110.02 1110.29  
 1124.97 1129.26 1130.75 1135.11 1140.36 1148.51  
 1149.18 1163.66 1190.51 1192.89 1204.60 1205.63  
 1208.26 1211.93 1214.47 1218.50 1235.43 1246.92  
 1263.48 1283.58 1291.03 1293.15 1298.09 1299.68  
 1302.22 1304.45 1308.68 1311.06 1314.33 1318.56  
 1325.75 1332.37 1343.08 1346.58 1351.35 1353.24  
 1355.72 1360.51 1363.96 1369.63 1378.06 1380.34  
 1382.39 1391.15 1392.04 1393.37 1395.91 1399.02  
 1400.14 1402.77 1412.92 1415.78 1417.55 1434.95  
 1436.77 1437.52 1461.14 1465.61 1474.28 1493.18  
 1494.60 1495.30 1497.61 1499.31 1500.41 1500.59  
 1501.21 1502.97 1504.40 1505.66 1506.42 1506.78  
 1507.42 1508.79 1511.42 1518.33 1519.00 1520.78  
 1522.07 1522.80 1523.23 1525.07 1525.16 1528.73  
 1610.82 1613.97 1614.70 1622.11 1642.85 1657.81  
 3013.61 3014.77 3016.20 3021.34 3022.76 3026.20  
 3029.17 3029.60 3033.27 3035.49 3035.96 3038.78  
 3039.06 3040.47 3041.05 3047.83 3048.14 3050.13  
 3069.33 3073.94 3074.83 3076.23 3076.94 3077.84  
 3079.68 3086.05 3101.98 3102.86 3103.23 3103.67  
 3107.78 3109.52 3109.62 3111.98 3116.37 3117.12  
 3117.74 3121.72 3125.89 3131.66 3147.66 3150.66  
 3170.72 3171.43 3179.81 3180.12 3182.87 3184.30  
 3186.30 3196.62 3197.19 3208.24 3214.96 3238.42

=====  
 L1\_140  
 =====

15.18 25.26 29.56 37.55 41.57 42.57  
 46.06 55.97 60.46 63.87 69.81 70.61  
 76.71 84.84 87.20 91.42 96.71 101.91  
 105.13 116.53 124.11 136.75 148.82 152.32  
 158.55 176.17 177.21 187.14 191.81 202.58  
 203.86 218.56 226.61 238.05 245.42 248.96  
 253.58 262.59 263.73 265.62 268.86 270.26  
 273.17 283.85 291.88 301.22 312.77 320.38  
 334.53 336.64 341.49 364.17 380.44 384.17  
 391.90 416.19 425.70 436.10 446.65 451.13  
 452.70 469.98 482.13 487.04 491.33 500.42  
 509.07 534.30 534.68 549.14 559.55 588.69  
 608.74 620.18 641.95 653.76 667.26 672.23  
 673.55 699.56 730.86 747.08 752.71 753.64  
 773.57 788.04 799.30 807.24 810.71 825.42  
 827.42 833.05 840.04 856.73 866.56 868.70  
 896.73 900.73 902.78 903.80 906.30 908.62  
 912.65 913.68 913.95 934.31 941.02 945.14  
 947.05 948.33 955.34 965.09 970.84 973.62  
 974.79 978.50 985.39 989.59 1005.61 1007.15  
 1020.29 1023.99 1028.58 1040.32 1046.34 1049.87  
 1058.27 1060.10 1063.82 1079.46 1086.67 1094.44  
 1096.63 1103.74 1104.84 1106.34 1110.01 1110.58  
 1126.49 1129.39 1131.54 1135.53 1139.43 1147.44  
 1149.02 1163.53 1190.16 1193.73 1205.03 1205.75

1209.59 1211.91 1214.41 1218.91 1232.88 1245.09  
 1264.12 1283.97 1290.64 1292.43 1297.69 1300.40  
 1304.04 1305.78 1308.06 1310.91 1315.42 1319.53  
 1329.24 1333.14 1342.26 1347.91 1352.00 1353.00  
 1359.81 1361.67 1364.50 1369.38 1378.35 1381.89  
 1383.02 1391.07 1392.85 1393.84 1396.55 1398.86  
 1402.21 1402.51 1413.34 1416.13 1417.53 1435.29  
 1436.98 1437.74 1460.44 1466.67 1475.73 1493.25  
 1493.55 1496.09 1497.88 1499.10 1500.04 1500.33  
 1500.87 1502.51 1504.17 1505.52 1506.53 1507.26  
 1507.48 1508.18 1511.42 1518.01 1518.73 1520.57  
 1521.69 1522.52 1523.36 1524.51 1525.33 1529.20  
 1612.57 1613.63 1615.63 1623.76 1643.16 1658.75  
 3012.69 3015.20 3015.75 3021.06 3022.01 3026.56  
 3027.26 3030.09 3035.61 3036.80 3037.50 3038.31  
 3039.46 3040.40 3042.13 3046.62 3047.21 3048.07  
 3066.48 3069.52 3073.81 3075.27 3075.93 3080.01  
 3083.14 3084.60 3100.04 3103.41 3104.28 3105.67  
 3108.86 3109.67 3111.74 3112.63 3117.22 3118.47  
 3119.91 3122.33 3126.47 3129.65 3136.93 3161.10  
 3170.37 3173.12 3175.80 3179.95 3180.12 3182.80  
 3183.84 3196.05 3196.34 3208.12 3213.00 3234.74

=====  
 L1\_150  
 =====

13.43 29.16 31.27 35.94 39.08 43.72  
 50.70 56.50 58.20 61.30 69.78 74.54  
 76.20 85.47 88.19 90.35 95.82 103.32  
 105.20 114.27 123.46 137.30 147.80 150.52  
 157.64 172.64 174.17 182.79 192.98 197.93  
 203.77 213.06 225.34 243.41 248.44 249.04  
 253.47 262.19 263.11 268.25 269.43 271.56  
 277.58 282.54 290.08 302.05 312.03 321.59  
 330.83 334.62 340.60 363.76 380.15 383.21  
 388.91 416.49 418.05 434.75 445.83 450.62  
 452.04 467.66 478.91 485.86 490.81 498.06  
 508.24 531.88 535.68 544.59 558.76 588.80  
 608.45 619.76 641.24 653.23 665.56 670.20  
 673.97 699.12 732.18 747.39 750.24 756.33  
 776.18 785.91 798.55 808.43 810.22 825.15  
 827.97 832.71 840.90 856.80 866.00 868.98  
 896.64 899.96 902.39 903.62 905.43 908.63  
 910.78 913.80 914.98 934.59 940.19 945.29  
 947.04 949.09 955.74 965.65 972.25 973.69  
 974.66 978.59 983.37 989.95 1005.14 1006.98  
 1020.72 1023.55 1028.25 1040.70 1045.84 1048.41  
 1053.87 1057.14 1063.39 1079.68 1086.94 1093.99  
 1095.00 1103.31 1104.24 1106.08 1109.16 1109.38  
 1126.50 1129.80 1131.30 1135.35 1138.58 1146.65  
 1148.27 1163.75 1189.86 1193.38 1205.10 1206.00  
 1209.42 1211.51 1213.67 1219.39 1231.95 1243.75  
 1265.27 1284.13 1291.37 1292.17 1296.91 1301.54  
 1304.80 1305.73 1307.59 1309.23 1314.39 1319.43  
 1326.16 1330.60 1341.19 1347.52 1352.97 1353.82  
 1359.06 1361.64 1364.26 1368.94 1378.34 1381.82  
 1382.05 1390.91 1392.16 1393.14 1396.47 1397.70  
 1401.25 1401.71 1413.79 1416.10 1417.18 1435.22  
 1436.41 1437.53 1461.07 1466.43 1475.81 1494.07

1494.52 1495.96 1498.03 1498.46 1500.50 1500.87  
1501.78 1502.15 1503.90 1505.19 1506.27 1507.33  
1507.47 1507.82 1511.73 1517.91 1518.46 1519.48  
1520.55 1521.71 1523.92 1524.80 1525.20 1528.36  
1610.63 1613.56 1615.23 1623.85 1642.72 1658.89  
3013.02 3014.71 3016.23 3020.82 3022.92 3024.45  
3026.35 3029.77 3034.79 3035.74 3036.24 3036.54  
3038.36 3039.60 3040.67 3042.97 3043.44 3057.03  
3066.97 3069.70 3073.96 3074.35 3074.63 3079.46  
3081.71 3083.00 3098.93 3102.68 3103.37 3103.69  
3104.06 3106.39 3109.58 3111.27 3113.87 3117.02  
3117.19 3122.98 3125.84 3127.42 3128.17 3155.01  
3159.65 3160.95 3169.93 3179.56 3180.25 3181.51  
3182.28 3194.25 3195.52 3206.78 3210.87 3235.51

L1\_160

16.86 30.03 31.54 36.66 39.47 48.42  
52.72 54.06 59.63 67.18 70.41 72.28  
75.71 83.15 89.09 93.78 95.17 103.45  
107.62 111.37 126.36 138.28 147.56 150.39  
159.35 170.84 174.98 181.76 192.06 197.85  
205.64 212.69 225.87 241.08 249.13 250.27  
253.91 261.97 264.83 266.90 269.72 273.97  
278.59 281.81 289.92 305.22 314.00 322.13  
331.60 335.54 339.31 362.94 380.08 383.90  
390.05 416.59 418.62 434.43 445.69 450.61  
452.53 468.83 478.21 483.87 490.83 496.05  
508.93 531.54 536.11 544.01 558.63 589.78  
606.46 618.87 640.07 652.86 666.64 670.22  
672.94 699.93 732.47 746.78 750.38 756.13  
776.56 785.44 798.52 807.98 809.35 824.38  
827.67 832.25 842.76 856.24 865.91 868.27  
895.40 899.39 902.13 902.82 906.43 909.20  
910.42 915.32 916.72 934.86 940.03 945.42  
946.26 948.21 955.56 963.55 973.73 974.16  
974.45 977.73 985.07 991.04 1005.94 1006.88  
1018.52 1022.86 1027.51 1038.64 1046.12 1048.83  
1054.01 1055.84 1062.50 1079.54 1087.76 1094.39  
1095.68 1101.83 1103.56 1105.18 1108.85 1110.03  
1125.52 1129.25 1131.92 1134.74 1137.33 1146.01  
1147.16 1162.74 1189.26 1193.34 1204.66 1204.87  
1209.53 1211.50 1214.29 1218.55 1230.61 1241.12  
1264.20 1284.14 1290.89 1291.51 1297.50 1299.70  
1303.22 1305.34 1307.32 1308.69 1315.14 1319.09  
1322.82 1333.12 1340.91 1348.63 1352.24 1352.63  
1358.20 1359.93 1364.07 1369.03 1378.53 1381.19  
1382.89 1391.16 1392.45 1393.47 1397.53 1398.42  
1400.08 1401.08 1414.50 1415.91 1417.46 1435.58  
1436.47 1437.58 1459.87 1466.25 1475.42 1493.26  
1493.78 1495.03 1497.25 1498.81 1499.41 1500.37  
1501.77 1502.07 1504.27 1505.11 1506.10 1506.78  
1507.28 1507.92 1511.40 1517.85 1518.31 1518.56  
1519.17 1520.58 1523.81 1524.23 1525.56 1528.32  
1609.00 1612.02 1615.10 1623.26 1640.50 1659.16  
3013.28 3015.06 3016.62 3020.91 3023.85 3024.57  
3027.24 3028.62 3035.71 3035.87 3036.78 3038.06  
3039.99 3040.87 3041.27 3041.71 3042.87 3067.86

3069.72 3070.71 3071.40 3074.50 3074.62 3074.90  
3080.22 3083.67 3097.62 3102.25 3103.75 3104.23  
3104.70 3110.36 3110.79 3112.00 3112.75 3116.42  
3117.48 3122.61 3123.20 3127.38 3131.07 3148.27  
3150.10 3160.09 3168.37 3175.27 3178.34 3182.86  
3188.98 3194.77 3195.80 3208.16 3210.83 3235.07

L1\_170

11.28 30.98 35.10 36.04 39.78 49.63  
50.13 55.19 60.64 66.99 70.86 71.62  
76.56 80.76 86.78 93.19 98.45 101.98  
107.95 110.09 129.49 138.92 147.67 149.18  
160.25 168.90 173.46 180.56 191.78 197.97  
206.77 212.71 226.47 241.26 249.09 249.33  
254.01 262.20 264.97 267.40 270.30 275.19  
279.48 281.75 289.86 306.09 315.03 321.80  
332.14 335.72 340.69 361.97 381.39 384.45  
390.60 415.35 419.66 434.19 445.35 450.71  
452.87 469.30 477.48 484.86 490.60 494.74  
509.15 531.55 536.97 544.05 558.13 587.04  
606.63 619.92 641.00 652.50 666.48 670.50  
673.10 699.44 733.40 747.24 749.83 756.84  
777.57 786.36 799.91 807.71 810.44 824.12  
828.10 831.85 841.66 855.70 866.07 868.29  
895.08 899.25 902.64 904.24 908.22 909.53  
910.05 915.05 917.55 935.29 939.92 945.57  
946.38 947.88 955.20 963.14 973.26 973.68  
974.00 978.69 987.91 992.05 1006.44 1008.77  
1017.50 1022.69 1027.53 1039.96 1046.11 1048.67  
1053.83 1055.73 1061.85 1079.89 1087.59 1094.19  
1095.74 1101.20 1104.43 1105.46 1110.09 1110.48  
1125.82 1128.84 1131.89 1134.51 1137.16 1145.78  
1147.19 1162.97 1189.75 1193.56 1204.60 1205.36  
1209.39 1211.45 1215.69 1218.84 1229.80 1241.68  
1264.46 1283.58 1291.17 1291.46 1297.64 1299.93  
1303.75 1305.21 1307.04 1308.91 1315.09 1319.44  
1321.23 1333.39 1340.38 1350.01 1351.88 1353.09  
1355.42 1359.20 1363.97 1369.13 1378.53 1379.61  
1383.43 1391.22 1392.44 1393.41 1397.36 1398.35  
1398.78 1400.58 1415.12 1416.19 1417.67 1435.96  
1436.82 1437.80 1459.98 1466.42 1475.28 1493.27  
1493.89 1494.94 1496.65 1499.56 1500.29 1500.59  
1501.57 1502.09 1504.66 1504.97 1506.15 1507.14  
1507.52 1508.40 1511.56 1517.49 1518.26 1518.58  
1519.13 1520.78 1523.56 1524.56 1526.21 1528.38  
1609.08 1612.27 1615.85 1623.45 1640.01 1658.84  
3012.36 3014.82 3016.14 3021.94 3022.34 3024.79  
3027.52 3029.05 3035.51 3036.01 3036.55 3037.47  
3037.60 3041.00 3042.10 3042.43 3042.72 3068.74  
3069.72 3073.12 3074.54 3074.69 3074.98 3075.57  
3081.01 3082.33 3094.35 3103.80 3103.94 3104.47  
3105.33 3105.51 3110.44 3112.94 3113.47 3116.95  
3117.78 3123.08 3124.09 3127.20 3133.27 3138.74  
3150.82 3154.84 3168.52 3173.82 3178.78 3183.51  
3191.16 3195.29 3196.94 3208.06 3214.53 3233.13

L1\_180

```

=====
13.73 28.89 33.13 35.41 40.74 45.82
52.53 53.09 58.95 63.95 68.22 72.39
80.93 82.63 85.04 93.22 98.87 104.91
108.25 113.84 122.62 138.33 145.51 151.24
159.61 169.96 171.76 181.09 190.39 199.41
206.07 214.49 227.19 238.10 247.00 248.79
252.88 261.48 264.94 268.30 270.81 274.28
278.07 284.09 288.79 306.68 314.61 320.53
332.50 337.05 342.33 362.05 381.99 383.65
391.82 412.68 422.19 434.45 444.50 450.13
454.12 469.64 475.91 485.85 490.77 495.80
508.50 530.19 535.60 546.76 559.64 587.75
608.01 619.57 641.96 652.67 666.47 671.37
673.05 697.02 731.41 745.29 752.61 754.10
776.06 789.51 799.07 806.22 807.74 821.81
826.53 832.17 840.39 856.53 865.57 866.52
894.58 897.99 902.16 903.33 907.90 910.18
911.38 916.08 917.35 934.10 939.55 945.03
946.28 947.18 955.43 962.30 972.08 972.91
973.74 976.67 991.56 994.61 1006.27 1014.28
1019.69 1021.85 1026.26 1038.10 1046.14 1048.32
1055.25 1058.89 1060.36 1080.58 1086.85 1094.63
1095.54 1099.99 1104.42 1105.73 1107.99 1109.02
1124.18 1128.58 1130.65 1134.26 1136.62 1144.31
1148.42 1163.44 1190.02 1193.61 1203.31 1204.45
1208.74 1211.50 1217.76 1219.40 1228.13 1240.20
1266.21 1284.16 1291.13 1292.34 1297.72 1299.87
1301.76 1304.14 1305.67 1307.94 1314.49 1316.34
1326.59 1334.52 1339.34 1351.26 1351.70 1352.44
1353.77 1358.89 1364.18 1368.97 1378.42 1379.02
1382.70 1390.43 1391.14 1393.26 1397.24 1397.45
1399.37 1399.66 1415.65 1416.19 1417.60 1436.23
1437.38 1437.99 1461.21 1465.96 1475.22 1492.75
1493.36 1494.76 1495.61 1499.40 1500.43 1501.03
1501.35 1501.65 1504.80 1505.50 1506.27 1506.82
1507.73 1508.21 1511.17 1517.81 1518.80 1519.50
1519.72 1521.29 1523.44 1524.02 1525.84 1527.84
1611.23 1614.62 1615.36 1621.01 1640.98 1659.21
3009.38 3013.78 3014.91 3019.50 3020.12 3026.13
3028.72 3032.85 3034.33 3035.42 3036.65 3037.43
3038.46 3040.83 3043.97 3044.86 3052.65 3068.00
3069.57 3071.31 3074.12 3074.39 3075.49 3080.62
3081.95 3083.54 3095.77 3099.36 3104.22 3104.85
3105.63 3106.43 3110.23 3113.15 3114.91 3116.90
3118.70 3124.05 3127.22 3129.46 3132.65 3151.14
3154.28 3164.53 3167.85 3177.80 3178.80 3183.94
3190.81 3197.89 3198.21 3208.28 3224.37 3224.89
=====

```

L2\_0

```

=====
21.23 25.87 32.94 39.17 46.05 50.86
57.04 63.18 73.83 75.50 76.23 86.37
96.33 101.99 104.40 106.21 108.00 116.23
121.09 130.14 137.09 140.63 144.93 150.89
156.40 160.94 163.51 166.21 178.61 182.24
184.72 194.17 204.80 210.74 223.11 226.56
229.68 235.98 243.15 245.73 248.14 253.67

```

```

255.70 258.15 262.21 264.31 273.22 274.51
275.59 279.64 284.94 293.05 304.94 308.32
315.61 322.01 330.47 347.59 355.34 363.87
370.08 380.69 384.38 395.90 405.55 412.64
416.37 427.22 452.13 460.18 465.05 474.54
481.08 483.54 491.20 517.92 534.77 555.00
584.58 595.28 616.09 623.91 624.71 630.17
638.96 653.25 656.82 669.03 674.47 709.11
723.92 746.94 749.09 783.02 790.67 811.36
832.48 847.54 858.48 894.46 895.12 903.89
909.04 912.95 920.92 938.94 944.25 946.59
948.58 949.23 960.77 962.46 964.23 969.79
975.11 975.59 976.34 985.56 986.54 988.99
989.91 1009.45 1037.86 1040.34 1042.62 1045.49
1054.60 1059.62 1068.37 1071.63 1080.72 1087.29
1090.27 1099.77 1107.49 1118.37 1119.42 1124.53
1127.37 1129.28 1131.58 1132.98 1142.78 1174.89
1184.82 1190.70 1191.27 1195.68 1201.13 1201.58
1209.97 1211.94 1224.19 1252.72 1282.06 1283.45
1285.31 1294.53 1299.64 1308.89 1317.44 1328.05
1343.20 1343.45 1345.60 1349.05 1349.96 1360.60
1362.60 1377.39 1402.05 1413.45 1414.38 1415.74
1418.34 1419.04 1419.93 1423.89 1426.82 1433.03
1433.51 1434.73 1435.75 1438.74 1440.36 1446.83
1466.16 1477.31 1485.26 1487.92 1492.04 1494.91
1498.59 1499.17 1499.97 1501.01 1502.60 1503.20
1503.68 1504.98 1505.59 1505.84 1506.95 1509.01
1509.45 1511.75 1515.32 1516.24 1516.97 1517.91
1519.07 1521.46 1521.96 1524.29 1526.33 1527.46
1527.90 1530.20 1534.74 1593.43 1595.49 1609.63
1618.84 1623.44 1657.11 3012.48 3030.66 3034.99
3035.05 3037.54 3037.71 3039.71 3040.17 3041.27
3041.46 3042.12 3042.58 3045.14 3046.16 3048.80
3055.89 3073.42 3087.43 3093.07 3094.08 3094.59
3099.27 3101.86 3105.39 3106.57 3108.78 3109.22
3112.27 3112.86 3115.37 3118.05 3119.94 3120.35
3122.46 3128.54 3131.92 3135.07 3137.42 3139.33
3144.19 3154.78 3160.10 3161.92 3164.89 3167.55
3172.55 3180.88 3182.99 3191.35 3194.06 3195.24
3204.73 3206.71 3218.12

```

L2\_10

```

=====
18.93 22.77 28.44 36.99 42.94 49.92
53.52 61.67 71.62 75.20 76.56 85.87
94.49 97.13 100.90 106.41 108.74 117.03
119.75 130.78 138.14 143.20 145.65 150.33
158.37 161.71 164.18 167.58 179.26 180.05
183.85 196.33 203.30 209.85 222.25 226.21
232.26 238.43 245.31 247.54 250.51 256.22
258.87 260.76 264.95 266.40 273.95 274.87
278.19 279.77 287.01 293.18 305.28 308.40
318.19 321.79 331.09 347.42 355.72 364.67
371.28 381.02 383.98 396.49 403.27 413.29
414.30 425.12 452.15 461.38 467.38 474.61
480.15 482.38 490.44 517.43 534.39 553.93
584.61 596.83 615.64 623.62 624.47 629.51
639.78 653.08 657.10 669.48 674.26 705.96

```

725.75 745.17 746.25 783.23 792.80 810.48  
832.61 844.70 858.35 894.17 896.40 903.63  
908.92 909.96 920.30 938.83 944.09 946.96  
948.50 950.75 960.30 962.07 964.69 967.66  
975.36 975.87 976.62 985.48 986.38 987.84  
988.69 1009.53 1037.11 1041.43 1042.89 1045.49  
1054.38 1059.89 1067.72 1071.78 1081.15 1088.11  
1090.26 1100.84 1106.95 1116.11 1118.72 1124.49  
1127.48 1129.62 1131.49 1133.19 1142.68 1174.87  
1185.11 1191.19 1191.80 1196.44 1201.30 1201.41  
1209.85 1211.71 1224.25 1251.93 1281.47 1283.46  
1285.50 1295.18 1299.48 1309.08 1318.28 1326.33  
1343.77 1343.95 1346.15 1347.89 1350.13 1361.29  
1362.14 1377.37 1401.30 1413.72 1414.60 1415.60  
1417.75 1419.46 1419.95 1423.83 1426.37 1432.55  
1433.49 1435.08 1436.13 1438.37 1441.81 1446.94  
1467.44 1477.38 1484.93 1487.99 1492.18 1494.58  
1498.78 1499.39 1500.63 1501.67 1502.92 1503.40  
1504.18 1505.12 1505.93 1506.05 1507.38 1508.22  
1510.00 1512.27 1515.46 1516.66 1517.26 1518.60  
1519.33 1522.15 1522.79 1524.44 1526.52 1528.30  
1529.59 1531.57 1535.64 1593.55 1595.89 1609.84  
1619.75 1625.73 1657.43 3012.77 3030.49 3033.45  
3034.77 3037.38 3038.05 3039.44 3040.26 3041.18  
3041.76 3041.97 3044.40 3045.08 3047.91 3048.58  
3055.62 3073.38 3088.04 3094.96 3095.28 3096.58  
3099.28 3101.30 3104.97 3106.41 3107.61 3108.61  
3110.16 3112.79 3114.55 3117.97 3120.25 3120.33  
3121.12 3128.35 3131.51 3135.81 3137.42 3141.30  
3145.25 3148.17 3159.85 3163.60 3164.63 3165.19  
3171.60 3173.09 3181.36 3191.83 3192.85 3196.26  
3208.21 3218.33 3219.75

=====  
L2\_20  
=====

17.08 33.34 34.22 36.04 42.60 49.63  
53.51 54.55 68.35 70.38 77.26 83.90  
96.84 97.39 103.11 108.42 113.45 117.93  
123.40 133.04 140.79 145.77 147.17 148.99  
156.36 158.85 160.67 173.74 179.67 183.09  
188.73 198.86 205.66 211.69 221.06 225.38  
226.96 234.79 243.06 244.19 248.88 250.62  
252.34 256.95 257.91 262.33 265.83 269.92  
273.76 281.73 284.87 294.01 303.68 307.98  
308.78 322.15 330.44 349.47 361.55 365.24  
371.38 381.33 385.97 395.55 408.73 410.21  
419.51 430.67 452.00 453.59 463.78 474.64  
481.36 484.12 490.16 518.77 532.98 553.04  
584.91 593.12 615.65 623.79 625.35 629.31  
634.67 654.33 657.75 670.43 676.16 709.29  
725.00 744.50 746.46 783.94 793.49 810.56  
832.33 848.69 858.23 892.45 895.67 905.04  
907.10 913.81 922.01 937.77 944.90 946.35  
946.46 949.11 959.18 960.47 966.44 972.50  
975.06 975.18 977.17 984.63 986.13 988.17  
989.84 1009.69 1036.38 1040.88 1043.06 1044.14  
1051.98 1059.10 1066.65 1072.15 1080.97 1086.72  
1089.66 1099.65 1108.56 1116.43 1118.87 1123.46

1126.86 1130.07 1132.20 1132.63 1142.75 1174.00  
1185.56 1190.72 1192.03 1193.61 1201.19 1201.98  
1209.93 1211.47 1223.79 1250.13 1280.68 1282.84  
1285.88 1289.44 1301.26 1306.49 1316.73 1322.89  
1343.61 1345.56 1347.69 1350.06 1353.38 1358.42  
1360.57 1375.44 1403.47 1414.05 1414.58 1415.79  
1416.71 1417.89 1419.67 1421.74 1425.09 1433.27  
1435.92 1436.10 1437.36 1438.40 1438.96 1445.45  
1466.47 1477.20 1484.77 1488.27 1492.86 1493.94  
1497.36 1498.48 1499.91 1501.39 1502.67 1502.97  
1503.35 1505.25 1505.30 1506.02 1506.71 1508.98  
1510.80 1511.25 1512.81 1515.74 1516.85 1517.68  
1519.46 1520.77 1522.29 1524.09 1524.76 1525.57  
1526.63 1533.70 1533.96 1591.04 1595.50 1603.34  
1618.95 1623.26 1656.25 3012.71 3030.38 3032.40  
3033.68 3036.19 3037.71 3040.19 3040.53 3041.12  
3042.07 3042.96 3043.79 3045.01 3048.52 3053.24  
3055.33 3076.24 3088.02 3090.48 3095.96 3097.56  
3101.43 3103.64 3103.86 3105.92 3108.06 3108.43  
3109.30 3113.33 3116.09 3116.67 3121.58 3124.58  
3128.93 3130.09 3133.32 3137.64 3148.28 3148.88  
3151.06 3156.25 3158.10 3159.35 3164.70 3166.61  
3172.61 3176.49 3187.71 3188.21 3192.18 3193.50  
3194.89 3204.40 3216.36

=====  
L2\_30  
=====

11.71 22.79 34.76 35.87 40.81 42.70  
50.04 53.49 63.57 70.30 73.95 80.55  
94.15 96.93 100.96 102.26 107.86 116.44  
122.96 132.75 136.78 144.92 148.20 151.24  
157.00 162.16 168.22 176.50 177.50 182.00  
188.25 195.09 205.45 209.95 221.49 223.37  
230.86 239.83 241.96 246.54 248.93 249.68  
252.80 255.66 261.71 265.04 266.23 272.64  
279.41 280.23 287.27 298.20 305.10 309.92  
310.80 319.98 332.68 349.50 362.73 366.12  
374.22 381.00 386.91 395.09 406.29 415.69  
421.78 432.20 450.68 452.32 462.95 476.53  
481.69 483.40 490.62 518.92 533.86 553.49  
584.85 592.68 615.11 622.73 623.10 628.52  
634.37 653.13 657.81 671.14 676.02 709.40  
727.38 741.32 747.60 783.55 795.17 809.89  
832.08 848.51 857.92 891.40 895.29 904.37  
905.72 913.46 922.07 937.88 943.00 945.99  
946.82 948.97 957.32 958.96 966.30 972.72  
973.65 974.97 977.20 984.37 985.87 988.92  
990.18 1009.34 1038.00 1040.54 1043.19 1044.39  
1052.26 1061.48 1066.90 1073.11 1081.53 1086.52  
1089.29 1098.62 1109.17 1115.94 1118.51 1123.22  
1126.63 1129.49 1131.33 1131.86 1142.25 1174.29  
1187.09 1190.85 1191.60 1193.72 1199.92 1202.16  
1209.44 1210.47 1223.51 1247.33 1278.12 1279.95  
1283.56 1287.77 1302.32 1305.92 1316.55 1321.17  
1344.51 1345.65 1347.58 1348.51 1352.48 1355.12  
1359.83 1374.88 1401.58 1410.74 1414.56 1415.34  
1416.77 1417.91 1418.25 1419.91 1424.97 1432.68  
1433.27 1436.07 1438.14 1438.22 1438.45 1445.43

1466.34 1476.54 1484.32 1487.27 1491.13 1495.19  
1496.97 1499.08 1499.68 1501.01 1501.86 1502.98  
1503.75 1504.33 1505.19 1505.61 1507.39 1508.02  
1509.77 1513.19 1514.87 1515.93 1516.61 1517.47  
1520.22 1520.85 1522.74 1524.25 1525.23 1526.99  
1529.76 1532.84 1536.16 1589.60 1594.99 1601.62  
1617.55 1622.56 1655.53 3009.61 3029.58 3032.36  
3032.90 3036.13 3036.54 3039.23 3039.90 3040.53  
3040.81 3041.21 3041.95 3043.01 3047.44 3050.73  
3065.88 3072.21 3087.29 3087.80 3095.27 3097.01  
3101.85 3102.16 3103.23 3104.00 3106.79 3108.72  
3109.41 3114.68 3115.00 3119.33 3119.75 3123.64  
3127.14 3129.10 3129.17 3131.79 3136.86 3146.61  
3146.77 3151.40 3157.82 3160.06 3163.21 3170.98  
3174.52 3175.79 3180.72 3189.84 3191.69 3192.05  
3200.77 3204.45 3211.26

=====  
L2\_40  
=====

13.28 28.59 30.70 39.11 42.35 44.02  
51.91 60.41 61.78 65.92 75.93 78.58  
94.61 99.40 104.17 105.60 111.91 117.71  
122.21 129.82 135.63 140.64 143.25 145.44  
148.94 156.31 163.91 170.79 177.01 183.89  
188.45 196.21 204.44 205.71 210.39 227.25  
228.91 233.56 236.87 239.53 245.29 247.51  
256.36 258.15 262.90 268.07 269.81 271.56  
282.52 284.55 287.53 299.84 306.64 308.46  
317.27 321.43 331.58 350.51 363.92 367.20  
374.00 382.61 383.26 387.73 406.56 416.85  
420.22 439.90 451.80 463.75 473.02 477.18  
481.87 484.24 492.11 518.37 534.30 552.78  
582.84 594.16 611.50 616.74 622.59 630.46  
643.27 652.57 664.63 671.81 680.75 707.72  
727.19 739.61 746.85 782.86 792.70 805.95  
832.80 844.63 856.00 891.51 893.90 896.07  
904.00 909.07 921.85 937.03 945.22 947.62  
949.39 950.12 955.09 957.20 963.38 970.84  
975.46 976.03 976.96 981.23 986.95 989.22  
991.01 1009.79 1038.38 1040.47 1041.18 1045.44  
1053.24 1061.79 1066.45 1072.54 1076.81 1084.28  
1090.38 1098.71 1104.93 1117.01 1120.94 1123.39  
1126.68 1127.88 1129.61 1131.74 1141.15 1172.80  
1185.96 1190.69 1191.77 1193.04 1193.70 1201.56  
1208.68 1208.98 1223.90 1244.86 1273.08 1283.39  
1284.56 1286.94 1292.21 1303.65 1313.80 1315.98  
1339.64 1340.70 1343.72 1351.91 1354.47 1357.22  
1363.08 1375.90 1397.70 1403.17 1414.01 1414.90  
1415.56 1416.90 1418.54 1419.34 1421.06 1428.83  
1432.31 1434.90 1436.19 1436.39 1438.95 1442.44  
1466.52 1474.92 1484.24 1489.01 1489.68 1493.47  
1495.44 1497.51 1498.77 1499.94 1502.67 1503.00  
1503.44 1505.24 1506.45 1506.68 1507.59 1507.90  
1511.02 1513.20 1515.93 1516.95 1517.59 1517.90  
1518.59 1521.53 1522.59 1525.57 1526.72 1527.55  
1528.03 1531.76 1542.07 1583.32 1596.41 1606.76  
1618.45 1622.12 1656.60 3008.91 3024.83 3027.12  
3034.90 3036.37 3037.99 3038.52 3038.70 3039.97

3041.46 3042.34 3044.79 3049.80 3053.96 3058.75  
3063.45 3069.81 3084.17 3088.33 3089.33 3094.25  
3095.39 3101.96 3102.07 3105.19 3105.93 3106.18  
3108.12 3112.37 3114.15 3114.57 3122.04 3125.36  
3133.34 3135.71 3136.78 3137.87 3139.50 3141.14  
3145.50 3162.23 3164.69 3168.25 3172.16 3173.16  
3175.06 3176.73 3181.26 3188.46 3191.87 3199.78  
3206.43 3207.04 3217.60

=====  
L2\_50  
=====

10.01 21.67 27.48 36.00 36.77 43.93  
52.00 57.50 61.49 69.53 75.14 87.53  
95.00 98.25 104.73 111.21 113.35 119.62  
122.77 129.52 137.11 139.39 143.41 146.48  
150.33 161.25 163.71 166.87 174.09 184.54  
188.20 194.04 201.71 205.99 207.06 224.95  
230.05 232.88 240.13 245.20 247.27 252.12  
256.97 258.89 264.37 265.73 271.47 272.37  
281.31 283.90 290.25 302.52 307.26 310.31  
319.77 323.94 334.49 349.74 363.93 369.56  
377.17 382.47 385.49 386.76 407.05 414.80  
423.40 436.44 452.76 464.60 472.22 477.74  
481.92 484.96 492.92 516.13 534.02 552.64  
582.02 593.00 609.55 616.90 622.55 630.90  
641.48 651.65 663.98 673.13 680.65 708.53  
727.13 738.05 749.74 782.44 793.96 805.79  
833.16 847.69 856.08 889.44 893.95 894.82  
903.46 913.31 922.38 936.34 947.16 948.34  
948.89 951.89 956.96 958.64 962.61 974.36  
975.34 976.33 977.34 980.92 987.10 990.89  
991.50 1009.54 1037.96 1039.90 1040.50 1045.93  
1052.55 1060.56 1067.36 1072.45 1077.31 1083.17  
1090.65 1098.94 1104.57 1116.07 1118.79 1122.81  
1126.17 1127.86 1129.23 1131.89 1141.02 1173.22  
1185.87 1189.49 1191.28 1192.05 1193.48 1202.41  
1208.20 1208.40 1224.20 1243.67 1270.39 1282.40  
1283.72 1286.33 1295.12 1301.98 1313.70 1314.67  
1339.65 1340.61 1342.58 1350.29 1354.66 1356.44  
1365.75 1375.57 1396.01 1401.94 1414.13 1415.27  
1416.19 1417.35 1419.14 1419.50 1421.83 1428.44  
1432.07 1435.21 1436.70 1438.81 1439.92 1443.15  
1466.65 1473.82 1484.08 1488.74 1489.08 1493.21  
1496.48 1497.53 1499.70 1500.07 1502.25 1502.67  
1503.36 1505.38 1506.33 1506.65 1506.82 1508.17  
1509.65 1512.82 1515.07 1517.21 1518.11 1518.80  
1519.54 1521.82 1523.71 1525.81 1526.54 1528.01  
1529.34 1532.35 1537.28 1582.71 1598.65 1606.74  
1616.49 1620.78 1657.59 3010.65 3023.75 3027.59  
3033.61 3036.78 3037.84 3038.27 3038.56 3039.93  
3041.36 3042.65 3044.79 3048.54 3051.82 3051.86  
3054.65 3071.50 3083.65 3087.57 3088.12 3096.80  
3096.83 3099.30 3102.95 3105.57 3105.69 3105.90  
3109.82 3111.90 3113.67 3114.03 3124.52 3129.54  
3133.56 3135.08 3136.37 3137.06 3138.61 3140.14  
3143.28 3158.06 3162.07 3166.54 3169.48 3171.09  
3175.27 3182.03 3185.74 3185.75 3186.49 3191.23  
3198.89 3200.76 3215.98

```

=====
L2_60
=====
19.99 31.15 33.23 38.22 41.68 47.06
52.80 60.05 64.93 78.33 82.56 90.31
93.59 99.82 105.81 106.09 112.66 120.74
122.92 132.90 134.57 140.26 145.71 150.38
152.50 159.07 166.01 172.11 174.96 179.94
186.55 190.29 196.67 199.75 215.55 220.81
222.44 229.86 243.88 252.46 256.53 262.81
264.27 269.88 272.58 281.53 284.63 289.69
294.16 299.56 304.30 305.41 309.96 315.62
320.69 327.76 332.53 356.03 362.34 369.53
376.92 383.05 385.53 392.36 402.16 415.12
424.38 430.14 455.18 460.12 471.13 480.60
482.27 484.17 487.77 497.87 530.87 556.37
573.36 590.88 594.85 613.65 620.28 630.04
637.89 647.85 662.23 670.55 674.88 707.46
721.55 728.93 748.06 778.69 793.62 807.82
831.49 849.04 850.59 888.69 892.03 893.17
899.44 917.29 920.68 930.26 937.63 946.29
949.33 952.63 953.81 958.19 959.37 970.82
976.76 977.64 978.70 980.23 980.51 989.73
991.74 1007.42 1036.59 1038.27 1039.14 1044.74
1050.35 1061.13 1067.52 1072.53 1077.62 1082.85
1090.19 1096.95 1100.72 1110.20 1114.09 1119.72
1122.33 1124.14 1125.46 1137.12 1140.98 1168.81
1184.30 1186.45 1190.48 1190.99 1192.65 1197.83
1202.98 1208.08 1220.65 1233.55 1268.68 1276.65
1280.15 1286.78 1293.91 1295.90 1315.74 1318.68
1333.64 1338.56 1345.29 1348.27 1356.03 1358.14
1359.27 1377.80 1397.41 1400.53 1412.89 1414.98
1416.24 1417.32 1419.25 1419.62 1420.78 1424.92
1430.23 1435.04 1436.30 1440.46 1441.44 1444.60
1466.27 1471.41 1483.70 1488.53 1491.28 1497.04
1497.45 1499.04 1499.36 1500.13 1501.65 1504.07
1505.14 1506.13 1506.58 1509.38 1510.29 1512.18
1512.74 1514.01 1515.92 1517.74 1518.37 1519.31
1520.80 1522.27 1523.27 1530.05 1530.28 1531.19
1533.76 1536.66 1539.68 1584.57 1600.68 1604.48
1614.31 1622.60 1656.71 2992.44 2995.32 3011.19
3024.00 3030.42 3033.31 3035.06 3039.00 3040.23
3040.61 3042.50 3046.43 3048.69 3050.18 3055.60
3056.97 3069.07 3072.71 3083.36 3090.03 3092.01
3097.56 3101.09 3101.80 3102.50 3102.83 3106.06
3109.23 3110.17 3115.23 3116.76 3119.53 3120.81
3128.39 3133.62 3137.06 3144.90 3145.01 3145.43
3150.50 3154.68 3161.79 3166.66 3167.68 3168.38
3171.45 3174.43 3177.86 3188.09 3192.85 3195.51
3208.25 3218.78 3235.07
=====

```

```

=====
L2_70
=====
17.54 21.36 31.08 38.82 41.88 44.78
55.97 60.42 65.58 74.76 82.67 87.84
92.79 99.15 101.43 107.39 111.65 117.49
123.14 131.48 131.52 137.91 144.68 149.00
154.61 156.87 165.37 167.43 177.22 178.32

```

```

188.39 190.44 198.23 200.32 216.38 221.46
228.65 242.70 244.09 252.57 259.43 260.66
265.93 271.23 273.44 274.43 276.14 281.05
294.32 297.29 298.89 302.23 313.41 315.82
326.75 329.13 340.32 353.44 362.87 372.85
380.23 382.81 385.73 392.72 403.27 415.87
422.78 429.81 457.96 463.45 470.65 473.29
480.76 484.58 487.04 500.46 532.03 556.71
574.16 591.12 596.00 615.41 620.55 631.39
638.60 648.27 663.43 673.47 676.57 707.57
719.27 727.48 748.81 774.69 795.66 806.13
831.68 851.18 851.93 888.92 891.93 893.82
900.28 917.60 919.78 929.31 936.36 946.89
947.82 953.09 953.90 958.38 962.17 970.23
975.53 977.67 978.24 979.94 980.38 988.80
993.04 1008.10 1036.01 1037.32 1041.27 1045.05
1051.04 1056.66 1067.40 1072.42 1077.83 1085.32
1089.43 1098.71 1100.99 1109.85 1113.98 1117.90
1120.85 1123.26 1126.59 1134.83 1140.93 1168.60
1182.39 1185.89 1191.15 1191.63 1193.05 1196.70
1203.47 1208.24 1220.54 1233.89 1267.35 1274.64
1284.11 1286.81 1293.71 1297.23 1317.02 1321.86
1332.92 1338.07 1343.53 1347.34 1353.93 1357.22
1358.33 1376.94 1395.45 1398.35 1413.34 1414.78
1416.61 1417.89 1419.01 1420.07 1421.68 1425.93
1430.54 1434.45 1436.50 1440.42 1441.75 1445.12
1468.25 1471.13 1483.43 1487.67 1491.60 1496.49
1496.91 1498.27 1499.20 1499.78 1501.33 1502.63
1505.73 1506.25 1507.26 1508.55 1510.54 1511.93
1512.50 1513.88 1515.43 1517.81 1518.42 1519.21
1520.51 1522.36 1524.03 1528.17 1529.37 1530.43
1533.05 1536.55 1540.77 1583.61 1603.64 1605.92
1616.21 1625.29 1657.43 2974.02 3003.53 3012.98
3032.55 3035.69 3036.14 3037.18 3038.13 3040.56
3040.80 3042.92 3046.02 3047.77 3048.68 3049.33
3058.83 3066.17 3074.56 3084.19 3089.94 3101.61
3101.80 3102.76 3104.86 3106.15 3107.88 3108.89
3109.36 3111.12 3118.06 3121.05 3122.67 3123.11
3130.88 3135.76 3136.74 3137.18 3144.54 3144.93
3156.60 3157.12 3161.31 3163.86 3166.14 3168.54
3174.52 3174.79 3178.96 3193.45 3193.78 3206.03
3206.54 3216.53 3233.36
=====

```

L2\_80

```

=====
16.81 25.36 27.17 34.31 39.67 43.47
45.80 55.97 61.30 65.65 70.71 80.31
88.62 91.95 97.24 100.21 106.06 111.74
119.91 129.52 133.96 139.17 142.78 145.81
154.29 157.00 166.23 175.77 179.64 184.06
185.97 199.29 203.02 208.61 225.19 225.52
239.68 242.26 245.77 250.87 254.25 261.63
263.50 271.45 273.25 275.29 285.16 290.12
296.25 297.26 304.29 308.30 311.55 316.14
321.23 325.59 338.89 340.78 352.87 362.45
370.82 378.39 390.94 393.98 403.39 415.97
422.17 433.00 452.09 456.49 470.53 478.46
481.39 491.15 510.45 526.55 537.83 549.95

```



569.37 586.42 601.69 608.31 616.04 625.17  
628.61 659.11 663.11 675.07 679.55 698.71  
709.88 745.32 748.85 779.55 790.99 813.82  
828.48 835.33 856.33 886.02 895.37 897.40  
905.74 907.35 921.29 933.25 942.26 944.86  
946.59 947.72 955.75 959.60 962.47 968.06  
973.48 974.86 978.05 979.51 981.50 986.93  
988.57 1003.93 1036.49 1036.96 1040.58 1047.85  
1054.66 1062.95 1071.31 1075.74 1080.90 1087.56  
1093.21 1099.92 1102.28 1110.74 1120.18 1122.76  
1124.19 1126.49 1128.50 1133.21 1138.15 1172.15  
1183.46 1185.60 1190.99 1192.09 1194.82 1201.65  
1202.86 1209.92 1223.23 1237.48 1276.03 1282.35  
1285.11 1286.01 1292.85 1313.60 1319.12 1325.10  
1337.86 1344.09 1345.77 1346.75 1347.54 1352.50  
1356.85 1372.61 1392.67 1403.39 1412.67 1412.98  
1415.54 1417.44 1418.10 1418.50 1419.15 1427.20  
1432.14 1434.62 1435.24 1436.85 1438.09 1443.54  
1466.23 1475.42 1483.67 1487.68 1491.52 1493.78  
1497.60 1499.32 1500.41 1501.02 1502.43 1503.53  
1504.30 1504.98 1506.12 1506.83 1507.33 1508.15  
1509.40 1513.24 1517.21 1518.27 1519.20 1521.15  
1523.25 1524.28 1524.88 1526.18 1528.38 1531.07  
1533.24 1535.28 1539.43 1581.36 1602.72 1608.03  
1614.18 1622.53 1656.89 3008.58 3023.54 3027.95  
3035.70 3036.96 3038.98 3039.31 3040.05 3040.24  
3041.21 3045.35 3045.65 3046.42 3047.81 3049.78  
3058.23 3070.13 3077.25 3080.97 3089.98 3092.03  
3102.70 3104.42 3105.94 3107.34 3109.53 3110.86  
3111.62 3112.60 3113.82 3115.61 3117.22 3127.96  
3128.57 3137.13 3137.40 3141.81 3150.87 3152.13  
3154.79 3158.29 3167.76 3170.24 3170.41 3171.27  
3175.09 3179.74 3187.28 3192.70 3197.30 3198.69  
3209.74 3211.25 3211.84

=====  
L2\_90  
=====

16.30 25.77 28.61 30.28 37.02 42.02  
44.70 57.66 59.90 65.67 72.49 79.50  
87.43 92.53 95.77 101.17 106.93 112.05  
119.73 130.15 134.69 139.37 141.44 147.08  
155.32 156.89 163.80 173.96 178.84 183.49  
185.03 197.79 203.15 208.16 223.52 223.77  
236.51 242.14 246.64 247.49 249.89 258.05  
261.11 268.14 270.91 273.72 281.41 290.37  
293.91 295.36 297.49 310.19 311.33 317.13  
320.41 321.86 335.72 338.97 352.70 360.15  
370.21 378.40 389.58 392.32 402.33 412.37  
416.69 429.53 447.36 452.26 466.22 477.33  
479.02 489.26 507.99 524.62 536.04 549.66  
566.99 584.48 599.33 605.91 617.03 622.03  
627.54 658.59 662.50 677.63 677.96 696.83  
711.56 743.68 747.45 778.04 788.87 812.73  
828.11 831.74 855.23 883.34 895.45 896.80  
904.01 906.70 922.08 932.69 941.36 944.08  
946.75 948.18 953.91 959.58 962.64 964.17  
973.82 974.75 976.49 978.44 980.46 986.31  
987.98 1006.59 1035.86 1039.60 1039.98 1047.48

1053.88 1064.09 1071.62 1076.22 1081.53 1087.70  
1092.50 1099.98 1102.72 1107.86 1120.46 1122.78  
1124.32 1126.32 1128.77 1132.88 1137.53 1170.25  
1182.41 1184.04 1190.60 1192.86 1195.74 1202.09  
1203.30 1210.32 1222.80 1237.22 1275.55 1280.51  
1285.75 1286.46 1291.87 1312.15 1317.84 1323.06  
1335.83 1342.72 1344.69 1345.23 1349.38 1352.94  
1356.76 1374.54 1392.94 1403.92 1412.90 1413.10  
1416.05 1417.53 1417.74 1418.89 1420.43 1428.46  
1431.88 1435.42 1436.10 1436.95 1437.86 1443.33  
1466.68 1475.79 1484.94 1487.90 1492.38 1494.94  
1498.04 1499.31 1500.31 1500.98 1503.04 1503.66  
1504.75 1505.30 1505.96 1507.22 1507.34 1507.89  
1509.76 1513.30 1517.89 1518.64 1519.50 1520.30  
1522.60 1524.25 1524.97 1525.94 1527.85 1530.87  
1533.03 1534.87 1537.31 1583.71 1601.67 1607.43  
1614.85 1622.20 1656.33 3009.17 3020.65 3028.20  
3035.70 3037.86 3038.53 3039.47 3040.91 3041.37  
3042.37 3044.21 3044.94 3045.38 3048.85 3054.44  
3062.18 3065.45 3071.06 3079.73 3088.22 3090.53  
3103.34 3105.04 3106.16 3107.62 3109.46 3110.29  
3111.72 3111.96 3113.54 3117.40 3119.41 3128.10  
3131.33 3134.93 3136.92 3139.44 3145.09 3149.65  
3155.14 3158.10 3166.90 3170.58 3173.88 3175.33  
3179.32 3188.93 3190.23 3191.80 3194.07 3197.53  
3211.53 3219.90 3220.53

=====  
L2\_100  
=====

16.56 22.85 28.06 29.94 36.43 39.06  
41.45 47.22 50.35 58.78 64.13 68.13  
75.87 87.10 96.62 98.65 102.42 114.06  
115.08 124.82 129.18 139.20 142.38 144.41  
152.86 164.49 165.38 168.47 169.29 179.90  
186.41 193.56 196.85 201.66 209.41 215.22  
224.53 232.94 237.98 242.38 248.60 251.85  
257.74 263.61 266.72 267.94 269.92 271.79  
275.82 283.72 285.96 294.02 306.04 317.97  
323.41 330.29 341.60 349.43 357.76 372.70  
373.72 378.62 385.26 395.32 400.66 405.48  
408.56 428.57 451.06 466.29 471.73 475.77  
479.22 489.29 501.68 512.89 528.61 544.59  
572.80 580.32 600.76 617.19 619.39 625.12  
632.04 658.14 659.90 677.86 678.96 698.53  
721.95 737.50 743.93 778.98 787.45 816.53  
827.25 835.80 849.19 891.32 892.56 898.72  
903.07 906.36 922.35 933.43 943.72 944.34  
945.86 946.90 951.46 953.83 956.56 967.16  
970.62 973.41 975.48 978.50 979.11 979.93  
989.20 1006.79 1036.87 1040.05 1041.81 1046.67  
1056.17 1063.83 1068.83 1072.25 1079.31 1083.39  
1085.26 1099.99 1102.21 1113.04 1114.49 1121.67  
1122.86 1124.36 1127.87 1129.49 1136.80 1168.72  
1183.94 1186.44 1190.76 1192.47 1193.11 1200.90  
1204.54 1207.68 1220.65 1238.51 1269.45 1278.58  
1283.40 1288.11 1291.42 1302.50 1315.93 1324.17  
1325.10 1330.48 1342.76 1343.87 1351.73 1353.75  
1356.93 1366.60 1392.94 1408.86 1414.38 1416.22

1417.20 1417.81 1418.64 1421.00 1422.68 1429.63  
 1433.17 1436.45 1437.95 1441.08 1442.05 1446.47  
 1467.50 1472.51 1483.97 1488.04 1491.53 1494.67  
 1496.16 1497.61 1499.10 1499.52 1499.79 1502.10  
 1502.74 1504.60 1504.92 1505.60 1505.99 1506.39  
 1507.02 1508.72 1514.43 1516.30 1517.23 1518.15  
 1518.72 1519.37 1522.00 1524.25 1527.36 1528.28  
 1532.04 1532.41 1541.73 1587.81 1604.06 1607.94  
 1616.18 1624.26 1655.84 3009.65 3017.90 3027.05  
 3035.17 3038.48 3039.91 3040.10 3040.69 3041.30  
 3042.53 3044.58 3045.91 3046.41 3047.10 3052.03  
 3054.42 3069.55 3073.02 3086.41 3089.59 3104.33  
 3106.50 3109.00 3110.34 3111.11 3111.86 3112.72  
 3112.82 3114.63 3115.38 3117.73 3119.68 3134.02  
 3134.14 3137.50 3137.81 3140.48 3142.93 3153.64  
 3156.72 3162.96 3165.09 3166.97 3167.87 3170.84  
 3178.81 3179.53 3188.07 3196.42 3198.21 3201.02  
 3205.07 3213.41 3229.86

L2\_110

10.42 16.80 24.51 29.84 37.39 39.81  
 42.01 48.28 52.15 61.05 65.23 68.73  
 79.35 87.93 95.64 101.48 104.36 113.55  
 115.21 129.18 131.58 138.80 142.67 145.38  
 151.56 161.94 164.55 171.00 172.81 178.27  
 184.90 191.90 196.57 201.94 210.64 218.22  
 223.28 232.23 237.00 242.91 246.49 248.72  
 252.03 260.26 264.68 268.71 270.61 273.64  
 275.23 284.07 287.15 293.94 306.03 318.39  
 324.66 329.53 342.27 349.39 359.06 372.10  
 373.63 380.16 386.49 396.00 398.98 405.65  
 409.41 426.85 451.75 466.36 472.01 476.12  
 479.66 489.31 501.69 512.69 528.27 545.50  
 573.18 579.78 601.06 616.32 619.76 625.68  
 633.36 658.48 661.47 678.20 679.87 698.63  
 722.48 735.17 744.21 781.77 790.53 818.75  
 827.30 836.24 851.44 891.84 894.22 898.88  
 903.27 907.03 923.08 933.91 943.53 945.10  
 946.19 946.88 951.84 954.71 957.04 967.62  
 969.68 973.24 975.55 978.17 979.13 980.70  
 989.77 1007.08 1036.63 1039.17 1042.54 1046.28  
 1056.78 1063.55 1068.67 1071.88 1080.25 1083.71  
 1085.82 1100.10 1102.44 1113.47 1114.91 1121.46  
 1121.70 1124.20 1127.54 1129.28 1137.02 1169.27  
 1184.08 1186.57 1191.30 1193.23 1193.67 1201.05  
 1204.65 1208.02 1221.42 1238.27 1271.04 1278.24  
 1284.17 1288.96 1291.11 1304.01 1316.54 1325.42  
 1326.47 1335.82 1340.90 1343.34 1351.69 1352.51  
 1356.53 1369.28 1392.70 1408.27 1414.72 1416.62  
 1417.25 1417.90 1419.12 1421.12 1422.43 1430.29  
 1433.24 1436.47 1437.60 1440.51 1441.35 1445.93  
 1467.73 1473.73 1484.32 1487.68 1491.46 1494.55  
 1495.75 1497.24 1498.93 1499.53 1500.11 1501.08  
 1501.60 1504.42 1504.91 1505.83 1506.34 1506.81  
 1507.08 1508.76 1513.17 1515.71 1517.66 1518.13  
 1518.48 1520.87 1522.41 1524.39 1528.24 1528.69  
 1531.23 1532.99 1541.92 1588.24 1605.31 1608.32

1616.05 1624.76 1657.22 3010.47 3027.61 3035.13  
 3039.23 3039.52 3039.90 3041.45 3042.39 3042.93  
 3043.45 3044.70 3046.04 3047.88 3050.80 3052.06  
 3056.01 3070.36 3073.69 3086.66 3089.21 3104.53  
 3106.23 3106.48 3109.54 3110.96 3112.27 3112.54  
 3113.25 3115.19 3116.72 3117.83 3121.52 3132.67  
 3133.94 3135.11 3138.13 3139.72 3143.04 3151.32  
 3153.90 3157.23 3162.59 3166.63 3168.81 3170.15  
 3178.21 3180.12 3186.87 3195.45 3196.92 3199.44  
 3203.53 3214.99 3224.52

L2\_120

15.91 25.47 27.36 32.87 39.55 40.81  
 43.53 47.10 50.23 58.71 67.84 71.51  
 83.56 91.75 95.23 99.36 105.95 107.26  
 115.65 129.93 133.80 138.70 141.70 145.87  
 151.68 161.75 166.52 173.32 177.66 181.17  
 186.30 197.59 199.49 203.67 208.08 220.21  
 224.51 234.65 235.40 242.65 248.65 253.72  
 256.41 260.25 262.58 265.20 266.80 271.40  
 277.52 283.70 287.88 290.37 308.96 319.13  
 324.56 333.10 340.01 348.88 360.36 377.60  
 379.15 384.33 386.34 390.08 400.31 408.32  
 411.31 423.18 453.06 461.91 473.07 478.01  
 482.00 488.28 500.43 511.04 530.23 548.69  
 576.42 579.95 601.68 615.63 619.41 628.69  
 633.58 656.68 665.42 677.60 681.64 700.51  
 724.53 733.48 745.00 783.09 790.99 818.39  
 829.80 837.26 851.28 889.85 893.88 897.41  
 903.78 905.46 924.80 933.50 938.77 943.88  
 946.00 947.21 951.36 955.77 957.19 967.68  
 970.31 973.22 974.76 975.23 979.03 982.36  
 989.50 1006.44 1036.96 1039.07 1041.04 1044.65  
 1056.91 1060.70 1067.14 1071.56 1080.68 1083.43  
 1086.21 1100.02 1101.31 1113.00 1115.58 1121.15  
 1123.56 1124.90 1128.10 1129.18 1136.35 1167.23  
 1184.16 1187.19 1190.17 1192.36 1192.74 1197.85  
 1204.84 1209.46 1218.95 1238.75 1268.38 1277.58  
 1281.88 1287.24 1295.31 1303.23 1316.84 1322.86  
 1328.37 1337.47 1343.71 1351.23 1352.66 1356.15  
 1358.26 1374.29 1396.92 1407.69 1415.47 1416.66  
 1416.79 1417.50 1419.99 1420.87 1422.19 1428.86  
 1431.28 1436.65 1437.60 1439.19 1440.70 1445.45  
 1467.00 1472.08 1483.26 1488.06 1492.11 1494.31  
 1495.20 1497.54 1498.66 1499.69 1500.02 1500.14  
 1501.43 1502.80 1503.78 1505.80 1506.23 1506.58  
 1507.05 1511.62 1513.86 1515.39 1517.02 1517.72  
 1518.34 1519.63 1522.09 1523.60 1525.00 1528.11  
 1532.52 1534.01 1543.45 1587.32 1606.30 1607.20  
 1614.85 1623.22 1655.94 3010.56 3027.64 3035.56  
 3036.55 3037.40 3038.60 3039.72 3040.10 3040.37  
 3041.77 3042.87 3045.68 3047.58 3050.72 3055.02  
 3070.00 3080.97 3084.07 3089.65 3090.09 3103.34  
 3105.31 3106.28 3107.31 3107.90 3109.80 3111.68  
 3111.91 3112.70 3113.16 3114.31 3117.81 3119.58  
 3121.29 3122.13 3134.69 3136.09 3138.58 3139.03  
 3144.27 3151.72 3156.33 3163.67 3170.40 3170.66

3177.97 3178.30 3183.48 3196.23 3201.61 3202.96  
3204.36 3207.69 3214.06

=====

L2\_130

=====

11.82 26.42 29.81 32.47 36.89 40.90  
45.22 53.76 60.65 62.47 67.94 72.28  
88.72 95.03 98.54 100.89 104.03 110.46  
117.04 124.93 132.29 134.39 144.31 150.00  
158.11 165.27 170.25 172.79 178.56 181.98  
189.94 198.82 202.85 205.06 213.92 224.17  
230.72 232.29 240.14 247.33 251.15 252.99  
256.78 259.64 263.54 266.21 268.79 270.69  
274.43 276.85 283.09 292.22 307.18 314.36  
321.72 325.21 332.79 348.53 360.02 369.33  
376.28 379.41 387.20 390.01 393.37 400.45  
413.91 418.54 452.15 464.10 474.28 480.75  
485.06 487.79 496.02 508.96 534.25 552.87  
580.15 582.86 605.18 615.97 619.83 628.75  
633.36 658.22 666.01 676.72 682.30 701.51  
724.63 734.96 747.08 784.86 792.94 820.90  
831.41 842.25 854.52 891.70 893.45 900.09  
902.52 909.68 922.51 932.85 943.00 946.03  
948.02 949.82 953.89 960.04 961.53 967.00  
970.25 971.15 973.78 976.80 982.20 984.40  
989.37 1007.16 1023.49 1039.46 1041.39 1042.88  
1049.01 1057.82 1070.43 1071.71 1081.20 1086.18  
1087.43 1099.58 1101.67 1112.44 1115.72 1123.31  
1124.97 1129.07 1131.47 1132.99 1139.25 1171.31  
1184.42 1189.20 1191.67 1192.10 1193.12 1200.27  
1205.28 1210.21 1219.37 1238.50 1271.02 1282.11  
1285.67 1289.31 1297.81 1308.67 1319.29 1321.78  
1325.34 1344.89 1346.91 1348.52 1351.95 1355.91  
1360.16 1375.34 1397.34 1410.42 1415.14 1415.99  
1416.60 1417.93 1419.11 1420.95 1422.87 1426.00  
1431.04 1437.03 1437.64 1438.65 1439.97 1446.78  
1467.27 1468.40 1474.53 1483.55 1492.04 1495.43  
1496.58 1498.29 1498.78 1499.87 1500.40 1500.65  
1501.83 1504.86 1506.32 1506.59 1506.90 1508.25  
1508.95 1512.44 1514.49 1516.58 1517.77 1518.39  
1519.91 1520.46 1523.05 1524.46 1525.17 1528.44  
1531.50 1533.43 1535.98 1589.18 1605.35 1609.04  
1615.53 1624.16 1656.69 3007.10 3009.32 3027.55  
3035.16 3035.98 3036.04 3038.33 3039.71 3040.14  
3041.26 3041.80 3044.68 3046.84 3049.82 3067.96  
3073.32 3080.44 3086.68 3087.13 3087.83 3096.63  
3104.01 3104.82 3106.03 3106.72 3108.77 3111.73  
3112.86 3114.51 3115.26 3115.73 3117.00 3117.55  
3121.59 3123.85 3125.92 3130.31 3140.05 3145.71  
3154.29 3155.66 3155.78 3161.39 3165.61 3168.81  
3173.21 3176.96 3179.14 3183.12 3189.84 3196.32  
3208.25 3216.32 3224.39

=====

L2\_140

=====

16.06 22.05 23.84 36.66 42.45 45.23  
45.56 54.22 59.38 64.94 70.61 86.03  
88.70 96.28 98.71 104.69 109.07 112.31

116.33 131.73 137.94 138.80 141.16 154.19  
157.75 161.71 171.14 175.83 178.50 180.91  
193.53 198.26 204.63 208.17 218.43 233.55  
236.57 239.49 248.44 250.71 254.34 262.02  
265.01 266.78 271.97 274.06 276.70 281.14  
288.00 292.85 299.56 304.61 307.62 315.57  
321.34 322.43 344.64 352.67 357.62 369.38  
374.98 381.66 386.35 396.98 406.30 416.50  
422.88 429.85 450.80 452.33 465.74 476.98  
482.55 488.09 491.69 511.82 533.54 554.10  
581.52 597.04 606.28 620.87 621.14 634.18  
636.90 659.06 662.10 675.24 679.91 703.97  
721.38 737.03 748.07 783.50 792.82 822.61  
830.81 844.85 856.19 894.48 899.69 903.09  
905.25 911.74 919.70 934.64 943.13 946.40  
948.81 953.81 957.06 962.56 967.01 969.88  
970.02 972.23 973.66 977.45 981.87 989.77  
993.13 1008.13 1018.43 1036.95 1040.97 1041.84  
1047.08 1058.53 1063.49 1072.20 1082.57 1085.89  
1089.33 1098.22 1103.04 1113.44 1119.29 1124.06  
1125.41 1127.53 1128.84 1131.58 1141.88 1178.54  
1185.28 1191.88 1191.94 1193.99 1196.87 1200.63  
1208.66 1209.23 1225.54 1250.37 1272.61 1280.18  
1281.87 1291.63 1293.22 1296.08 1318.51 1327.01  
1335.97 1344.18 1345.38 1346.54 1351.45 1354.05  
1358.02 1371.59 1394.59 1395.52 1405.92 1413.83  
1415.44 1417.26 1420.78 1422.36 1426.55 1428.51  
1433.98 1436.32 1437.08 1438.35 1443.34 1447.35  
1466.94 1476.07 1484.09 1487.57 1493.67 1495.02  
1497.74 1499.42 1499.94 1500.70 1502.46 1503.44  
1503.68 1505.37 1506.64 1507.26 1508.43 1508.70  
1512.00 1513.45 1516.51 1518.14 1518.51 1519.56  
1521.43 1524.94 1525.17 1527.37 1528.25 1529.50  
1533.12 1536.89 1550.91 1592.04 1603.39 1611.16  
1616.97 1624.10 1658.12 2913.55 3009.23 3028.04  
3034.90 3037.50 3039.43 3039.51 3039.60 3041.74  
3042.74 3043.31 3044.35 3045.28 3048.47 3050.63  
3067.63 3070.27 3074.77 3087.17 3089.78 3091.58  
3091.90 3103.22 3104.45 3104.90 3105.20 3109.50  
3110.51 3111.20 3113.27 3115.69 3116.70 3117.70  
3122.41 3140.01 3140.06 3141.44 3147.79 3150.23  
3150.25 3154.63 3155.79 3164.15 3164.78 3168.26  
3174.34 3175.13 3176.17 3178.24 3181.96 3195.76  
3199.56 3206.76 3217.85

=====

L2\_150

=====

18.07 21.84 24.45 37.19 41.95 45.17  
48.49 55.78 62.65 66.22 71.68 87.31  
90.99 97.45 100.51 105.25 109.36 113.01  
118.91 133.92 137.75 140.54 142.39 154.05  
160.47 162.91 172.09 174.16 177.29 181.38  
191.80 198.67 204.86 208.92 218.36 234.37  
237.65 241.00 251.34 252.50 257.86 262.67  
266.25 267.55 273.55 277.05 279.29 281.71  
289.64 296.80 298.15 307.09 308.34 316.70  
322.36 327.88 344.14 353.03 359.95 370.50  
375.29 383.41 384.44 398.22 406.68 417.55

427.25 431.14 454.10 455.77 464.32 477.13  
482.65 487.75 491.48 511.63 533.53 554.40  
581.30 598.03 609.73 621.80 623.43 635.29  
638.70 658.88 662.42 675.09 680.32 705.94  
722.85 736.07 748.42 785.56 792.27 822.48  
831.71 847.17 857.46 895.19 900.04 902.18  
905.62 913.26 918.50 931.63 943.68 946.64  
948.77 954.73 959.26 963.32 965.44 970.43  
971.42 972.47 973.71 977.06 981.70 989.95  
992.85 1008.55 1019.37 1037.73 1041.71 1042.32  
1047.84 1056.85 1060.99 1072.54 1082.32 1085.99  
1089.16 1098.60 1102.29 1110.77 1118.65 1123.64  
1124.58 1126.97 1128.71 1131.17 1141.33 1178.90  
1185.32 1191.99 1192.19 1194.72 1197.84 1200.61  
1208.29 1210.32 1225.53 1248.89 1275.15 1279.26  
1281.46 1289.53 1292.10 1295.48 1317.93 1323.46  
1339.40 1342.42 1344.45 1345.31 1352.18 1355.92  
1356.79 1370.75 1391.16 1393.34 1408.62 1413.57  
1415.46 1417.53 1420.71 1421.72 1425.56 1427.10  
1433.33 1436.33 1436.98 1438.24 1442.74 1446.30  
1466.81 1475.26 1486.40 1487.52 1493.63 1496.32  
1498.13 1499.25 1500.41 1500.80 1502.90 1503.66  
1503.91 1505.13 1506.81 1507.77 1508.87 1508.96  
1512.14 1513.19 1517.24 1518.28 1518.56 1520.06  
1521.91 1525.06 1525.42 1528.40 1529.72 1530.25  
1533.66 1538.04 1552.30 1590.98 1605.00 1609.43  
1617.65 1624.18 1657.91 2915.18 3009.97 3028.23  
3035.16 3037.72 3039.22 3039.66 3039.99 3042.04  
3043.04 3043.54 3045.05 3045.62 3047.57 3052.90  
3062.54 3067.26 3071.40 3087.23 3087.27 3089.87  
3092.85 3102.91 3104.40 3105.00 3105.26 3109.70  
3110.62 3111.03 3113.94 3114.82 3117.40 3117.69  
3124.18 3139.24 3140.66 3140.79 3145.77 3147.82  
3151.70 3153.81 3160.15 3162.06 3165.01 3167.81  
3174.41 3174.63 3175.70 3176.07 3177.80 3195.10  
3202.47 3204.66 3220.12

=====  
L2\_160  
=====

14.43 21.55 24.70 30.39 36.61 43.42  
44.25 49.97 56.89 69.17 72.63 83.38  
89.02 95.68 100.51 104.55 106.68 110.05  
119.19 121.70 133.50 135.62 141.09 153.87  
161.66 168.18 170.02 173.91 175.59 181.74  
188.15 196.75 206.52 210.06 216.55 226.34  
234.04 234.71 244.92 246.29 251.54 258.02  
260.15 263.38 267.07 270.54 270.96 277.64  
281.35 289.53 294.88 307.53 312.26 318.24  
319.65 337.28 345.65 351.12 366.11 367.47  
377.00 383.49 390.11 394.18 399.31 413.93  
424.19 431.20 456.44 466.44 474.09 477.97  
486.91 491.57 494.68 514.63 535.57 555.83  
582.36 599.72 609.35 616.84 620.91 627.43  
650.79 655.81 657.72 673.68 676.19 703.15  
717.08 740.61 749.46 784.84 795.14 822.44  
830.31 838.85 857.84 893.82 901.55 903.24  
904.54 908.84 917.93 933.15 942.63 944.78  
946.80 946.96 956.27 958.89 961.42 966.63

972.64 972.90 973.83 973.86 979.88 983.88  
989.27 1009.18 1022.15 1040.55 1041.19 1042.21  
1046.00 1056.74 1068.56 1071.36 1077.66 1084.66  
1085.39 1099.40 1101.31 1109.96 1118.70 1122.08  
1126.02 1128.77 1130.03 1130.43 1139.91 1178.16  
1185.75 1191.32 1192.07 1192.80 1198.65 1200.57  
1208.25 1210.74 1224.08 1248.84 1274.74 1280.02  
1282.12 1288.51 1290.89 1297.26 1319.99 1321.28  
1325.59 1337.01 1345.83 1351.85 1352.31 1356.28  
1357.46 1372.08 1389.78 1395.80 1407.64 1414.70  
1415.59 1417.31 1418.56 1420.53 1423.59 1428.76  
1433.82 1436.46 1438.18 1439.19 1440.54 1446.41  
1468.07 1473.82 1485.83 1489.58 1492.80 1497.27  
1498.34 1499.40 1499.80 1500.36 1500.63 1501.13  
1502.81 1504.19 1506.24 1506.71 1508.23 1508.79  
1509.91 1511.82 1516.13 1517.97 1518.33 1519.45  
1521.43 1522.44 1524.92 1525.39 1526.71 1527.90  
1531.74 1532.86 1547.34 1591.90 1607.82 1608.62  
1619.76 1626.64 1658.83 2930.31 3010.74 3028.96  
3035.09 3037.54 3039.25 3040.51 3040.74 3041.82  
3042.90 3043.74 3044.74 3045.96 3048.18 3050.39  
3056.40 3058.61 3073.02 3085.93 3091.08 3091.41  
3102.64 3104.24 3104.88 3105.55 3110.86 3113.07  
3113.53 3114.13 3116.94 3117.46 3117.95 3120.18  
3125.91 3130.81 3138.17 3138.64 3141.54 3147.47  
3163.53 3164.26 3165.12 3165.26 3166.62 3167.71  
3175.23 3178.15 3183.32 3184.57 3187.39 3193.21  
3200.99 3203.02 3245.00

=====  
L2\_170  
=====

14.89 20.47 25.46 32.95 40.87 44.97  
51.18 52.29 58.96 74.37 76.36 85.56  
90.21 97.81 102.41 104.66 109.63 114.94  
124.54 131.01 134.40 139.05 148.50 150.13  
157.77 161.07 163.57 171.38 179.08 185.37  
187.44 196.72 203.66 210.85 216.41 230.58  
234.21 237.89 241.27 243.95 250.11 253.55  
260.96 263.33 267.96 269.79 274.13 285.99  
291.65 295.74 302.82 307.72 315.01 319.99  
329.24 331.06 345.97 352.06 359.53 371.79  
377.02 381.67 392.43 398.56 401.25 413.84  
418.88 437.49 446.77 456.68 469.93 476.36  
478.90 491.18 499.15 509.74 527.62 552.16  
568.89 599.50 609.07 616.18 621.79 625.39  
645.03 658.35 670.17 673.37 678.70 706.96  
718.43 732.69 748.49 782.55 786.51 817.06  
826.20 845.32 856.32 890.27 898.90 900.92  
905.45 910.76 918.05 922.45 946.17 947.40  
947.77 950.23 952.80 954.63 957.75 969.41  
970.44 973.94 974.15 977.28 985.83 987.49  
990.70 1009.06 1019.04 1038.14 1042.08 1042.80  
1049.40 1055.62 1071.22 1072.29 1079.94 1080.77  
1087.57 1096.00 1100.23 1109.89 1117.87 1122.37  
1123.74 1128.77 1129.60 1137.88 1144.92 1172.48  
1185.35 1190.86 1192.46 1196.40 1197.78 1199.43  
1207.23 1212.36 1223.13 1246.37 1272.53 1276.44  
1281.50 1285.95 1288.00 1317.83 1318.18 1322.39

1335.22 1346.47 1346.95 1352.03 1353.81 1363.18  
1367.25 1369.88 1386.69 1391.53 1405.24 1413.88  
1415.44 1417.75 1418.77 1420.21 1424.21 1426.09  
1435.03 1436.57 1437.02 1439.81 1440.19 1444.86  
1466.62 1470.98 1484.78 1489.02 1492.86 1496.34  
1498.40 1499.63 1500.17 1501.03 1501.14 1503.47  
1504.48 1505.75 1506.63 1506.90 1507.37 1508.98  
1511.10 1513.02 1515.31 1518.54 1518.75 1520.80  
1522.02 1522.95 1525.18 1526.29 1528.97 1532.21  
1532.94 1535.87 1557.36 1589.38 1606.95 1607.69  
1619.85 1623.49 1658.53 2896.08 3011.85 3029.30  
3035.54 3036.42 3037.26 3039.32 3040.04 3041.74  
3042.59 3044.89 3045.57 3046.53 3047.11 3049.48  
3049.82 3052.91 3067.78 3074.51 3089.65 3092.96  
3094.07 3104.08 3104.87 3105.07 3106.58 3110.77  
3111.16 3114.10 3115.33 3115.60 3116.83 3117.52  
3120.90 3125.41 3126.90 3130.86 3142.51 3151.65  
3157.80 3166.49 3167.17 3171.83 3173.30 3174.88  
3177.12 3178.31 3178.98 3185.80 3194.24 3197.53  
3202.79 3207.23 3210.72

L2\_180

13.61 24.76 26.28 33.54 40.96 45.28  
50.50 53.66 59.81 75.58 76.28 85.72  
92.28 100.06 104.11 105.27 112.37 116.14  
122.53 129.88 132.63 139.04 146.84 149.69  
157.07 160.26 168.02 169.04 177.73 185.13  
188.74 196.44 203.04 207.56 212.62 226.57  
233.37 238.25 244.79 245.35 250.30 253.74  
261.73 262.57 268.63 269.62 273.61 285.90  
290.85 296.90 304.38 305.99 308.05 314.30  
316.54 326.25 342.57 353.07 359.57 368.52  
374.73 379.04 392.96 398.64 400.84 413.04  
421.65 436.22 439.38 459.07 470.26 477.36  
479.46 490.57 496.94 508.29 529.37 551.47  
566.84 600.29 609.24 617.77 621.56 624.49  
644.64 658.05 671.27 675.61 681.66 706.40  
718.96 733.19 747.95 781.93 786.64 815.96  
825.48 844.42 856.61 890.32 899.99 901.85  
906.14 909.35 918.29 923.04 946.16 947.23  
948.05 950.26 953.21 954.64 955.98 968.61  
972.18 973.00 973.92 976.30 985.62 987.38  
990.64 1009.41 1021.17 1037.81 1043.08 1043.86  
1047.29 1051.20 1071.31 1077.63 1080.53 1081.21  
1088.53 1096.48 1100.88 1109.28 1117.71 1120.49  
1123.28 1128.06 1129.10 1137.58 1144.46 1171.87  
1184.62 1190.95 1193.30 1197.09 1198.67 1199.98  
1206.19 1211.39 1223.18 1244.62 1271.96 1278.82  
1284.43 1286.37 1288.09 1315.48 1319.02 1320.10  
1337.85 1343.88 1347.20 1350.84 1352.90 1360.44  
1367.81 1370.88 1388.42 1391.79 1408.17 1413.56  
1416.30 1417.46 1418.81 1419.60 1423.70 1425.11  
1434.34 1436.30 1436.76 1440.39 1441.30 1445.25  
1467.90 1470.66 1484.51 1490.25 1492.62 1496.24  
1499.40 1499.83 1500.34 1500.64 1502.00 1503.71  
1504.96 1505.41 1506.25 1506.62 1507.24 1508.88  
1511.68 1513.35 1514.56 1518.19 1518.89 1521.33

1522.31 1523.05 1524.64 1526.46 1527.94 1531.79  
1533.71 1535.67 1542.33 1586.97 1605.73 1607.23  
1620.48 1625.27 1658.60 2944.21 3008.94 3014.66  
3029.55 3035.66 3037.51 3039.52 3040.36 3041.72  
3043.83 3044.19 3045.41 3046.42 3047.16 3048.10  
3048.50 3052.81 3072.00 3078.24 3089.39 3089.99  
3090.83 3104.02 3104.71 3105.16 3107.69 3109.60  
3111.07 3111.66 3115.54 3116.50 3117.60 3117.93  
3122.14 3128.10 3129.72 3133.57 3141.83 3143.56  
3157.77 3161.15 3166.71 3168.03 3173.44 3175.10  
3176.52 3177.63 3177.85 3185.23 3192.87 3198.41  
3202.86 3205.53 3217.81

L3\_0

22.32 28.59 30.89 34.81 41.02 48.44  
49.53 55.60 61.03 64.04 68.81 77.53  
78.25 81.64 88.23 94.04 96.30 103.95  
106.57 108.69 111.68 114.91 124.30 131.15  
138.55 147.08 152.44 156.24 170.62 173.14  
176.98 180.03 184.13 193.68 198.44 205.10  
207.62 216.66 225.51 230.01 237.47 246.83  
247.22 249.40 252.93 254.59 259.43 261.78  
267.88 272.02 274.96 284.03 289.68 297.64  
303.77 320.69 326.32 330.67 342.30 349.41  
357.91 362.68 380.11 387.02 393.41 397.03  
404.22 418.36 421.50 428.95 450.25 451.79  
456.53 466.57 470.09 477.57 480.00 482.68  
488.89 519.04 522.56 532.06 536.28 554.20  
586.95 607.93 617.19 624.37 632.76 647.20  
653.24 669.73 670.51 708.95 717.97 731.21  
746.90 748.12 751.03 785.13 789.16 808.78  
812.22 816.18 828.12 829.02 833.07 848.42  
858.52 867.00 872.58 894.88 903.09 905.03  
906.31 909.23 912.49 913.91 921.92 938.30  
941.76 944.96 945.32 948.25 949.13 960.64  
964.38 972.65 975.19 975.90 976.86 987.92  
990.00 1010.07 1024.27 1027.93 1034.02 1041.64  
1043.18 1044.32 1048.00 1048.83 1056.27 1066.87  
1069.12 1070.88 1071.95 1082.72 1090.12 1095.15  
1099.49 1101.44 1106.82 1107.51 1112.16 1116.73  
1124.97 1127.15 1129.64 1132.22 1136.85 1143.38  
1148.77 1175.15 1184.42 1191.55 1191.60 1201.17  
1209.63 1210.95 1211.92 1216.55 1224.50 1235.07  
1243.68 1252.34 1282.96 1286.08 1296.31 1297.43  
1301.32 1305.74 1307.74 1308.92 1314.48 1317.95  
1321.82 1328.61 1343.31 1344.60 1345.48 1347.25  
1349.14 1360.76 1361.66 1368.05 1369.84 1377.31  
1380.82 1386.54 1390.78 1394.32 1395.50 1395.87  
1400.67 1402.21 1403.75 1413.81 1415.16 1415.99  
1419.90 1420.58 1426.70 1432.80 1433.61 1435.71  
1436.71 1438.65 1466.85 1478.10 1486.28 1489.84  
1491.45 1493.93 1496.16 1497.17 1498.29 1499.29  
1500.62 1501.43 1501.62 1502.75 1503.22 1503.54  
1504.19 1504.93 1506.03 1507.42 1508.78 1509.23  
1510.81 1513.46 1514.34 1516.67 1517.13 1517.77  
1519.54 1522.00 1524.14 1525.98 1526.86 1531.30  
1533.24 1594.36 1595.77 1610.35 1620.27 1624.42

1657.32 3009.51 3011.10 3012.53 3013.37 3013.87  
3021.26 3024.42 3029.44 3030.74 3032.92 3033.52  
3037.37 3038.45 3039.32 3039.76 3040.50 3041.85  
3049.44 3055.41 3056.42 3058.42 3063.90 3067.72  
3071.18 3071.63 3072.04 3075.33 3077.91 3084.46  
3087.57 3091.69 3094.59 3095.27 3095.55 3099.05  
3101.90 3103.05 3106.30 3108.61 3112.70 3119.81  
3120.21 3123.15 3124.26 3128.13 3130.93 3133.22  
3135.80 3136.74 3138.72 3144.84 3145.95 3161.47  
3163.59 3171.64 3181.19 3190.86 3191.51 3192.58  
3210.01 3217.41 3217.76

L3\_10

23.60 31.54 33.80 38.53 41.79 48.32  
50.79 57.25 60.42 63.62 68.92 75.00  
78.59 80.74 88.23 92.23 96.61 101.48  
106.01 108.77 112.80 115.87 126.18 131.83  
136.71 146.83 152.93 157.43 169.43 174.59  
179.57 180.97 185.28 192.18 197.24 206.55  
207.12 217.98 226.03 229.26 231.89 244.12  
245.51 249.22 253.86 254.24 258.72 259.32  
267.30 269.40 273.86 281.61 287.84 297.86  
305.17 320.76 326.07 330.34 341.65 350.83  
361.19 361.89 379.84 386.14 395.74 399.39  
408.43 419.00 422.17 429.76 450.08 451.84  
456.41 464.87 468.11 477.99 480.81 482.34  
489.38 519.69 521.62 530.93 535.15 553.35  
587.83 607.91 616.97 624.33 633.03 647.73  
654.08 669.27 671.49 711.17 719.64 731.59  
747.84 748.37 749.06 784.92 790.48 808.14  
812.60 815.69 828.56 829.23 832.59 850.30  
858.42 866.67 872.27 895.53 903.39 905.29  
906.61 908.69 913.63 914.79 922.02 938.58  
941.02 944.21 944.94 947.81 949.52 961.47  
964.29 974.69 974.85 975.74 976.76 988.75  
990.12 1009.94 1023.95 1028.07 1035.22 1040.45  
1042.94 1043.41 1047.69 1048.56 1054.80 1067.34  
1069.27 1071.20 1072.58 1082.82 1090.10 1095.05  
1099.13 1100.19 1106.00 1108.28 1111.64 1116.58  
1124.57 1126.77 1129.86 1132.20 1136.94 1143.85  
1148.88 1174.70 1185.01 1190.61 1191.31 1201.48  
1209.75 1211.02 1211.76 1216.64 1224.02 1235.35  
1244.49 1251.88 1283.55 1285.11 1290.56 1297.08  
1302.38 1306.24 1307.12 1308.18 1313.77 1316.92  
1321.52 1328.10 1343.23 1344.61 1346.41 1346.67  
1350.35 1360.65 1361.16 1368.01 1370.20 1377.14  
1380.87 1386.44 1390.55 1393.82 1395.28 1396.63  
1400.65 1402.98 1403.50 1413.85 1415.43 1415.91  
1418.21 1420.05 1424.76 1433.48 1434.72 1435.60  
1436.86 1438.64 1465.51 1478.07 1485.59 1489.80  
1491.89 1494.11 1495.77 1496.92 1498.17 1499.15  
1500.22 1501.14 1501.74 1502.27 1502.77 1503.17  
1503.49 1504.54 1505.37 1506.82 1508.81 1509.32  
1510.75 1513.02 1513.32 1516.30 1516.52 1516.86  
1519.24 1521.72 1523.50 1525.40 1526.27 1530.81  
1533.16 1592.53 1594.70 1606.99 1618.55 1621.86  
1656.87 3008.17 3010.36 3012.18 3013.05 3013.62

3021.17 3021.81 3030.41 3031.26 3033.38 3033.83  
3037.48 3038.58 3039.68 3039.88 3041.04 3041.89  
3050.42 3053.24 3053.68 3056.61 3064.08 3067.14  
3071.53 3071.68 3071.80 3075.43 3078.01 3083.97  
3084.58 3090.14 3093.64 3093.86 3099.36 3102.21  
3103.62 3106.58 3108.81 3112.40 3113.43 3117.93  
3120.62 3127.60 3128.17 3130.00 3131.50 3134.67  
3136.44 3136.72 3143.02 3147.26 3156.40 3163.89  
3164.61 3171.19 3183.52 3188.35 3192.36 3193.77  
3197.05 3205.59 3218.34

L3\_20

19.69 29.39 33.74 39.94 41.10 46.73  
51.32 55.91 59.79 62.30 69.95 72.14  
79.13 80.77 87.43 91.02 96.71 100.69  
105.79 110.22 113.46 117.23 131.17 134.44  
139.00 147.53 156.74 157.63 168.99 173.65  
179.75 181.71 190.61 194.16 196.47 206.51  
208.42 219.12 221.42 227.89 233.10 243.31  
244.23 248.75 253.11 257.41 258.46 259.85  
265.47 267.30 272.22 279.86 284.93 297.70  
306.28 320.78 326.16 329.14 341.39 351.78  
360.06 363.98 379.06 385.57 395.51 397.71  
411.79 418.46 421.42 428.61 448.83 452.12  
456.40 460.21 466.69 477.71 480.02 481.96  
488.61 516.49 520.70 530.78 533.80 551.98  
587.99 607.85 615.65 623.60 632.67 646.88  
654.11 670.12 671.14 710.13 720.72 732.11  
744.35 746.78 747.96 785.10 791.15 806.33  
811.88 815.42 826.75 828.68 832.18 850.75  
857.59 865.42 872.01 895.55 903.07 905.11  
906.25 907.76 912.81 914.42 921.74 937.00  
940.17 943.83 945.49 947.61 949.64 961.63  
963.67 974.49 975.34 975.49 976.44 988.30  
989.49 1010.20 1023.04 1027.53 1036.80 1040.83  
1042.26 1043.49 1047.05 1048.25 1054.65 1066.91  
1068.03 1071.70 1072.23 1083.44 1090.00 1094.66  
1098.75 1099.84 1105.31 1107.76 1111.35 1115.50  
1123.53 1126.48 1129.90 1131.54 1136.31 1143.65  
1148.67 1173.78 1186.20 1190.75 1191.71 1201.69  
1209.52 1210.71 1211.59 1216.47 1223.86 1234.51  
1243.93 1250.38 1283.44 1285.00 1286.26 1296.91  
1302.38 1304.09 1306.40 1307.87 1313.22 1316.53  
1320.51 1324.43 1343.31 1344.85 1346.64 1347.78  
1350.77 1359.07 1359.72 1368.07 1370.20 1375.77  
1380.48 1385.97 1390.23 1393.07 1395.13 1396.50  
1400.67 1402.83 1402.97 1414.07 1414.77 1415.80  
1416.58 1419.61 1421.57 1433.20 1435.09 1435.57  
1437.45 1438.22 1465.90 1478.01 1485.16 1488.69  
1491.58 1494.25 1494.72 1496.93 1498.27 1499.63  
1499.89 1500.94 1501.55 1502.25 1502.72 1503.39  
1504.31 1505.46 1506.14 1507.89 1508.05 1509.02  
1511.13 1512.62 1513.46 1516.05 1516.97 1518.19  
1520.75 1522.68 1523.31 1525.32 1526.02 1530.40  
1534.05 1590.88 1594.47 1605.21 1618.62 1622.24  
1656.46 3007.26 3010.08 3010.68 3012.99 3013.89  
3020.54 3021.41 3031.98 3032.22 3032.36 3033.55

3036.90 3038.71 3039.34 3039.93 3041.01 3041.98  
3051.66 3053.45 3055.46 3059.58 3063.65 3066.55  
3071.16 3071.87 3072.17 3075.17 3079.26 3080.21  
3084.18 3091.13 3092.46 3094.11 3099.42 3102.88  
3103.42 3106.84 3109.16 3112.83 3116.60 3120.34  
3123.25 3125.92 3129.68 3130.55 3131.60 3131.71  
3136.52 3139.59 3147.49 3148.02 3160.18 3163.29  
3163.53 3170.89 3183.75 3184.17 3186.88 3192.95  
3193.61 3203.34 3216.80

=====  
L3\_30  
=====

10.73 29.09 32.50 39.94 43.34 47.70  
48.18 55.02 57.66 62.14 65.87 71.81  
78.74 81.94 87.61 91.26 98.26 99.74  
103.04 107.46 112.59 113.47 128.91 131.30  
136.02 144.20 151.58 159.47 163.78 168.42  
174.31 180.05 185.13 188.72 194.55 206.79  
208.17 221.15 229.17 231.11 234.01 244.19  
249.36 250.15 254.83 260.26 261.30 263.50  
268.36 273.07 276.43 284.05 297.64 305.98  
311.17 320.64 326.01 328.01 338.76 350.54  
356.89 361.02 380.48 383.12 388.12 399.00  
413.58 418.61 422.19 428.62 448.80 451.61  
455.46 460.49 465.03 474.98 479.22 485.97  
489.84 513.86 520.82 527.67 537.45 555.40  
587.46 604.67 616.94 623.04 631.47 647.49  
651.75 671.20 672.86 709.41 716.53 727.63  
747.61 748.23 756.11 785.23 786.31 806.36  
810.52 815.16 826.02 829.26 831.83 849.81  
858.26 865.11 871.52 895.66 902.62 904.49  
906.97 908.16 912.63 913.62 921.62 937.50  
939.80 943.16 946.57 947.04 949.89 962.36  
963.07 973.74 974.35 975.53 976.38 989.40  
989.64 1010.38 1022.56 1028.05 1038.73 1041.83  
1042.45 1045.49 1046.66 1047.76 1058.63 1067.37  
1069.39 1072.24 1073.04 1084.88 1090.18 1094.88  
1097.79 1100.30 1104.37 1107.39 1110.37 1119.37  
1123.66 1126.91 1129.45 1131.58 1136.57 1143.79  
1149.80 1174.39 1183.52 1191.47 1192.06 1202.24  
1208.99 1209.91 1210.48 1216.19 1224.40 1234.82  
1247.18 1252.15 1283.00 1284.63 1291.98 1296.94  
1301.51 1302.33 1306.16 1308.33 1312.43 1319.05  
1321.63 1324.62 1343.36 1345.17 1346.09 1347.35  
1353.21 1356.76 1360.26 1368.25 1369.71 1375.50  
1380.49 1385.20 1389.87 1391.55 1394.72 1395.76  
1399.90 1402.11 1403.00 1414.52 1414.99 1415.30  
1416.08 1418.82 1420.32 1430.99 1433.20 1435.47  
1436.95 1437.65 1467.53 1477.28 1485.95 1488.53  
1490.94 1493.56 1496.24 1497.70 1498.62 1499.03  
1499.44 1500.38 1500.93 1501.42 1503.01 1503.38  
1504.22 1505.07 1505.94 1506.65 1508.23 1508.45  
1511.67 1512.53 1515.88 1516.00 1516.39 1518.43  
1521.49 1522.49 1523.66 1526.11 1526.16 1528.11  
1529.75 1587.86 1595.49 1607.40 1619.69 1624.37  
1656.36 3005.78 3008.47 3012.02 3012.32 3014.69  
3016.47 3020.74 3030.69 3030.93 3031.72 3033.19  
3035.66 3036.54 3037.52 3038.29 3038.54 3042.22

3045.72 3050.51 3056.92 3059.99 3064.80 3065.83  
3071.14 3072.59 3074.14 3075.27 3077.90 3079.88  
3083.54 3087.96 3088.37 3090.68 3098.07 3100.18  
3101.81 3106.53 3107.57 3109.58 3112.25 3112.96  
3119.81 3121.82 3124.57 3126.53 3127.01 3129.30  
3131.21 3137.25 3143.97 3146.54 3162.60 3163.55  
3163.87 3171.43 3177.30 3185.24 3186.03 3187.66  
3191.58 3202.76 3212.94

=====  
L3\_40  
=====

13.40 19.22 31.82 37.36 42.90 47.32  
49.89 52.26 57.21 59.77 63.60 69.85  
72.38 81.68 82.19 91.19 96.28 99.03  
104.50 108.52 113.71 114.63 127.25 132.34  
135.40 144.35 150.43 156.55 161.93 167.93  
171.76 179.00 184.22 189.04 192.19 207.09  
208.50 221.53 227.50 232.82 236.07 241.19  
249.03 252.89 257.20 260.10 260.61 262.90  
270.77 273.01 277.89 291.92 297.33 313.45  
320.86 323.41 327.38 330.35 338.76 350.50  
362.50 364.50 380.07 383.70 387.33 398.19  
412.41 419.65 425.60 429.24 447.65 452.30  
455.11 459.99 464.64 476.54 480.40 486.90  
492.32 516.12 519.84 526.56 537.93 554.38  
590.01 603.63 619.07 623.15 630.89 647.62  
650.86 671.62 672.42 709.53 713.54 725.54  
746.36 747.91 757.33 784.43 788.46 805.55  
810.78 814.36 825.78 828.55 830.88 850.36  
858.57 864.52 870.62 894.75 902.12 906.14  
907.06 907.69 912.88 914.95 922.62 936.72  
939.72 942.66 946.04 946.60 950.45 960.80  
962.61 972.61 974.99 975.60 976.63 989.37  
990.48 1009.77 1022.25 1027.98 1038.96 1040.93  
1041.39 1045.72 1046.58 1047.20 1060.56 1066.80  
1068.96 1073.04 1074.18 1084.08 1089.65 1093.36  
1097.62 1099.22 1104.13 1104.73 1110.02 1120.40  
1123.57 1125.97 1128.18 1132.84 1136.47 1143.99  
1148.96 1174.33 1184.13 1190.95 1192.77 1200.81  
1208.65 1210.27 1210.81 1216.11 1224.01 1235.65  
1248.29 1251.55 1280.58 1283.19 1292.34 1297.10  
1299.25 1302.03 1306.24 1308.43 1312.16 1317.22  
1321.53 1323.30 1343.90 1345.88 1346.54 1348.01  
1348.82 1352.50 1359.45 1368.50 1370.14 1373.61  
1380.17 1384.78 1389.18 1390.70 1394.08 1396.00  
1399.86 1399.94 1402.41 1412.35 1415.02 1415.61  
1416.65 1418.96 1419.87 1430.08 1432.94 1436.67  
1437.95 1438.33 1466.16 1475.89 1485.58 1488.74  
1490.49 1493.87 1497.66 1498.05 1498.95 1499.68  
1500.26 1500.84 1501.57 1503.26 1503.60 1503.71  
1504.33 1505.75 1505.82 1506.97 1507.24 1508.07  
1511.73 1513.50 1515.65 1516.59 1517.25 1519.30  
1521.55 1523.81 1524.20 1526.42 1528.48 1530.55  
1532.91 1584.52 1596.39 1606.70 1616.85 1622.04  
1656.95 3004.81 3007.76 3009.29 3011.18 3012.28  
3013.27 3018.48 3028.35 3030.67 3031.18 3032.97  
3034.81 3036.24 3037.25 3038.20 3038.73 3040.73  
3042.32 3051.22 3055.83 3059.46 3062.20 3066.72

3070.83 3072.10 3072.62 3073.63 3077.59 3078.17  
3083.62 3085.75 3088.23 3093.05 3095.48 3098.37  
3105.19 3105.37 3105.77 3107.65 3108.12 3114.89  
3115.70 3117.74 3121.89 3122.95 3125.04 3125.29  
3132.78 3136.85 3144.30 3150.67 3160.09 3164.31  
3165.57 3172.18 3183.07 3183.68 3184.70 3187.03  
3192.94 3208.84 3210.57

=====  
L3\_50  
=====

18.20 20.87 32.53 34.52 41.93 46.29  
49.03 52.63 54.37 58.33 61.75 67.01  
69.13 79.24 82.12 90.87 97.70 99.90  
101.53 109.11 112.37 117.53 125.73 133.30  
137.55 144.02 152.45 157.30 165.82 170.87  
172.28 178.85 182.34 189.61 192.78 206.02  
206.75 220.82 226.63 233.91 236.62 241.12  
247.93 251.79 256.99 257.84 260.02 263.83  
271.15 272.05 281.41 293.93 297.48 312.80  
317.78 323.12 326.68 333.61 337.00 349.50  
362.85 369.28 378.95 381.60 386.23 397.47  
412.74 418.98 425.49 429.11 446.45 451.79  
453.96 456.62 462.69 476.58 479.20 486.48  
495.06 516.35 520.07 523.27 536.44 552.94  
590.28 602.88 616.84 622.60 630.27 646.66  
650.16 670.84 673.55 707.86 711.52 722.87  
746.58 747.91 757.11 782.37 790.80 805.62  
809.27 810.01 824.38 827.24 830.88 848.57  
858.49 864.41 867.81 895.27 900.73 906.19  
906.51 907.38 912.09 914.19 922.15 935.14  
938.02 940.59 942.14 946.20 950.66 959.74  
962.37 972.03 974.21 975.36 975.86 989.59  
990.35 1009.96 1021.19 1026.84 1038.00 1040.21  
1041.92 1045.27 1045.96 1046.45 1060.26 1067.12  
1068.22 1072.66 1074.38 1084.27 1088.02 1094.36  
1096.16 1100.79 1104.40 1105.38 1110.00 1118.33  
1122.13 1127.01 1128.66 1131.40 1135.72 1142.06  
1147.72 1173.20 1183.99 1191.85 1193.30 1200.88  
1207.38 1210.09 1211.25 1215.45 1224.66 1234.18  
1245.89 1249.85 1277.06 1282.39 1291.93 1296.75  
1298.89 1301.69 1306.01 1307.60 1311.85 1317.19  
1318.74 1322.57 1342.40 1344.29 1347.06 1347.62  
1349.25 1350.77 1359.42 1368.74 1369.58 1370.12  
1381.22 1384.01 1388.85 1390.52 1393.91 1396.27  
1399.36 1399.88 1401.49 1407.51 1413.85 1415.81  
1416.84 1417.86 1420.07 1428.63 1432.82 1435.51  
1436.95 1439.97 1466.93 1475.61 1484.18 1487.50  
1488.27 1494.70 1496.23 1496.90 1498.22 1499.20  
1500.17 1500.80 1501.33 1503.27 1503.78 1504.28  
1505.18 1505.72 1506.28 1506.65 1507.98 1508.78  
1511.79 1513.04 1516.47 1517.12 1517.41 1518.21  
1520.84 1521.51 1523.56 1526.59 1527.68 1532.24  
1537.74 1582.16 1598.56 1604.84 1617.89 1623.04  
1658.25 3004.94 3007.90 3010.90 3011.56 3015.14  
3015.67 3020.72 3030.28 3032.45 3033.46 3035.07  
3036.23 3037.04 3037.08 3038.80 3039.53 3040.70  
3041.42 3055.48 3059.40 3062.74 3064.79 3067.10  
3070.89 3072.52 3073.43 3075.69 3077.60 3079.91

3084.20 3089.81 3095.58 3097.98 3098.42 3101.16  
3101.52 3102.06 3106.50 3109.87 3114.67 3118.18  
3118.52 3122.30 3124.12 3126.98 3131.22 3134.86  
3137.15 3137.54 3141.41 3146.40 3163.07 3164.71  
3164.90 3173.08 3180.54 3184.07 3187.17 3188.82  
3193.03 3213.63 3214.80

=====  
L3\_60  
=====

10.76 28.40 32.85 36.08 39.87 47.59  
47.87 49.67 54.78 64.06 65.15 71.86  
77.98 81.44 88.99 94.73 101.20 103.81  
104.75 114.74 115.44 120.64 123.72 128.70  
138.29 149.45 151.18 159.97 163.10 173.41  
176.04 177.99 183.72 184.82 195.38 200.85  
205.29 221.19 224.74 228.11 236.11 237.11  
243.89 249.05 256.22 257.49 262.19 263.66  
272.83 276.54 278.52 283.24 292.97 296.71  
309.94 325.65 331.82 332.27 337.31 349.51  
359.14 372.26 378.62 382.40 385.93 395.40  
404.87 417.79 423.09 430.93 444.15 446.97  
448.55 457.94 469.87 475.81 478.94 485.36  
491.50 497.43 518.33 525.94 534.47 549.65  
585.09 595.37 606.08 621.73 627.59 642.87  
647.54 668.00 672.86 699.14 706.21 720.86  
744.00 747.60 755.57 774.79 787.69 798.77  
804.82 807.11 822.28 825.29 830.98 844.72  
854.28 862.46 866.19 894.64 897.46 902.93  
905.82 906.74 911.14 917.45 927.73 929.18  
936.19 940.64 944.97 949.89 951.15 953.74  
958.94 971.40 973.56 975.53 976.87 979.23  
988.97 1009.16 1020.73 1024.97 1036.27 1038.66  
1038.74 1042.21 1044.70 1046.34 1058.77 1064.05  
1065.69 1068.87 1073.30 1082.99 1086.13 1093.34  
1094.41 1099.67 1103.40 1106.14 1111.31 1113.01  
1119.64 1127.18 1128.64 1133.33 1136.89 1140.22  
1147.04 1170.13 1185.23 1191.76 1193.32 1199.80  
1204.77 1208.32 1209.61 1211.33 1222.77 1232.57  
1237.97 1246.66 1270.21 1280.25 1289.85 1292.16  
1295.93 1299.51 1303.89 1308.04 1309.64 1311.55  
1314.89 1316.86 1333.66 1342.95 1344.90 1348.10  
1348.76 1354.44 1359.62 1367.42 1367.74 1370.15  
1379.11 1382.53 1389.40 1391.30 1392.91 1395.22  
1396.49 1397.73 1400.04 1401.39 1414.27 1415.98  
1416.18 1416.93 1417.60 1426.81 1431.41 1436.29  
1437.90 1441.07 1466.57 1474.19 1483.52 1487.19  
1487.49 1489.13 1492.17 1496.27 1497.55 1499.35  
1499.54 1500.23 1501.89 1503.19 1503.82 1504.24  
1505.35 1505.88 1507.14 1507.54 1508.17 1510.90  
1512.76 1513.73 1515.90 1517.75 1517.98 1518.64  
1520.44 1521.64 1523.59 1527.63 1529.58 1530.49  
1537.64 1579.90 1601.02 1603.84 1617.08 1621.94  
1658.26 3006.39 3008.91 3010.73 3016.31 3018.62  
3022.82 3030.38 3030.66 3031.34 3031.87 3033.73  
3035.18 3036.10 3036.60 3038.44 3041.39 3045.25  
3056.25 3056.89 3067.25 3069.27 3070.14 3071.13  
3073.18 3075.16 3075.52 3077.94 3079.11 3082.95  
3086.01 3093.48 3095.73 3100.03 3100.67 3104.27



3104.98 3105.26 3105.29 3107.64 3111.65 3112.07  
3120.45 3126.86 3136.79 3137.25 3138.04 3141.17  
3143.81 3146.23 3148.54 3157.99 3160.25 3160.89  
3161.64 3169.74 3179.95 3181.13 3184.63 3189.62  
3194.96 3207.15 3210.11

L3\_70

14.22 25.10 30.10 33.03 38.71 46.44  
48.81 53.85 57.74 61.13 66.58 68.93  
81.14 85.97 91.10 97.28 99.58 104.64  
107.80 112.63 115.40 119.43 125.83 132.71  
134.84 145.78 150.90 161.17 165.20 175.93  
176.76 181.99 185.15 192.29 195.23 200.34  
202.84 210.85 223.47 227.87 233.82 242.03  
247.62 251.42 257.87 263.53 265.04 268.26  
271.32 280.68 286.10 292.44 293.79 305.62  
310.02 325.35 328.65 333.44 339.13 347.89  
353.83 371.21 377.11 381.83 385.93 395.54  
403.60 419.11 421.37 427.59 444.41 448.35  
454.43 460.74 464.05 473.89 476.08 478.81  
487.22 497.46 520.25 530.49 533.07 546.41  
577.60 591.53 603.97 620.80 624.96 639.67  
642.99 666.62 674.82 696.03 706.42 721.05  
742.72 747.32 753.41 770.64 787.85 802.04  
805.86 812.99 819.38 826.48 828.88 849.39  
851.49 863.29 864.87 893.03 898.04 902.12  
902.47 905.61 913.07 919.55 920.87 924.23  
937.15 941.32 942.15 946.52 948.30 952.41  
957.23 968.40 973.85 975.04 976.46 977.99  
989.00 1007.45 1019.10 1025.05 1032.88 1038.53  
1039.16 1042.04 1045.31 1047.05 1054.58 1062.54  
1063.87 1066.40 1073.14 1082.86 1084.61 1093.10  
1094.55 1097.26 1104.58 1107.41 1110.99 1112.24  
1119.30 1121.29 1128.88 1136.80 1137.44 1139.76  
1145.14 1167.49 1185.99 1190.46 1190.97 1197.23  
1199.64 1208.36 1209.15 1210.84 1219.63 1228.92  
1231.71 1246.56 1266.17 1273.47 1285.94 1292.65  
1297.03 1297.87 1302.80 1307.95 1310.34 1314.82  
1315.27 1315.73 1337.20 1342.71 1344.78 1346.87  
1349.57 1356.95 1357.50 1365.49 1367.93 1369.82  
1379.03 1382.62 1387.96 1391.28 1393.21 1394.74  
1395.73 1397.09 1398.96 1403.83 1413.91 1416.08  
1416.33 1418.26 1418.69 1426.15 1431.07 1435.41  
1439.53 1441.14 1465.47 1471.15 1483.16 1485.97  
1489.48 1492.03 1494.72 1497.50 1499.06 1499.92  
1500.25 1500.54 1501.22 1503.43 1504.65 1505.07  
1505.43 1506.17 1507.89 1508.95 1511.21 1512.39  
1514.74 1516.26 1516.94 1518.02 1518.09 1518.48  
1521.06 1523.63 1525.87 1527.14 1530.71 1532.21  
1535.11 1581.38 1599.87 1604.93 1613.70 1619.79  
1654.64 3009.36 3010.91 3011.00 3015.48 3019.55  
3020.21 3021.80 3029.31 3031.78 3033.89 3034.10  
3034.93 3036.53 3039.46 3039.58 3041.32 3043.88  
3044.22 3051.16 3059.74 3063.45 3070.31 3071.78  
3072.04 3073.78 3074.77 3077.61 3080.12 3081.76  
3083.32 3086.44 3091.03 3095.44 3096.02 3097.73  
3100.60 3101.31 3102.88 3103.72 3104.34 3109.85

3110.49 3120.83 3121.08 3134.60 3137.20 3138.55  
3139.13 3144.97 3155.45 3155.61 3156.35 3160.82  
3168.13 3177.17 3179.47 3183.70 3190.85 3197.04  
3197.12 3201.86 3216.94

L3\_80

16.83 26.74 29.49 33.25 40.41 46.91  
52.95 55.01 59.69 61.08 69.87 77.69  
78.71 82.10 90.92 93.60 95.55 103.03  
108.04 113.14 119.97 123.57 128.13 141.30  
144.57 148.72 159.87 164.67 168.12 170.67  
177.83 185.86 192.20 195.50 199.84 202.10  
205.50 225.20 229.13 232.23 244.73 246.22  
252.33 260.14 265.39 268.26 272.03 274.07  
281.29 294.35 299.82 303.11 308.82 309.24  
312.64 317.59 327.15 335.83 348.15 359.05  
365.21 371.33 380.09 388.12 399.59 400.52  
409.64 411.71 423.68 442.87 443.27 451.42  
456.45 465.74 472.87 479.49 481.65 488.19  
500.43 512.85 524.37 531.72 536.89 554.50  
582.11 603.60 608.52 621.46 631.93 646.66  
660.99 671.78 677.55 700.54 722.62 725.91  
736.07 743.93 746.96 792.36 796.32 810.07  
814.89 816.72 822.71 827.23 830.58 837.07  
856.41 863.36 868.67 895.72 901.26 902.45  
903.69 907.11 911.20 914.72 919.66 934.84  
939.34 940.69 941.24 946.34 948.40 960.04  
964.20 965.20 974.00 976.74 982.25 984.07  
987.60 1008.04 1023.55 1025.72 1032.67 1038.52  
1041.21 1042.40 1045.37 1046.08 1058.68 1064.64  
1066.30 1070.41 1074.62 1084.17 1085.86 1090.21  
1091.79 1099.66 1101.09 1104.58 1106.61 1108.41  
1124.21 1125.04 1129.06 1133.26 1138.53 1140.06  
1157.13 1172.87 1185.52 1190.92 1192.68 1200.90  
1202.61 1207.95 1209.31 1210.21 1221.37 1234.73  
1241.36 1267.52 1269.58 1275.66 1285.06 1289.60  
1295.93 1297.38 1300.13 1301.79 1311.26 1315.30  
1316.19 1320.02 1327.01 1332.23 1335.85 1337.85  
1343.57 1345.81 1352.82 1366.85 1368.19 1369.62  
1377.40 1379.92 1382.81 1384.31 1392.72 1393.13  
1394.91 1395.76 1398.84 1404.67 1412.06 1412.81  
1414.01 1416.88 1416.98 1423.03 1435.15 1436.05  
1436.88 1438.15 1467.46 1474.99 1483.08 1486.86  
1491.12 1493.94 1498.73 1499.51 1499.55 1500.02  
1500.86 1500.97 1502.03 1504.49 1505.18 1505.92  
1506.43 1506.94 1508.13 1508.93 1511.92 1513.11  
1514.20 1515.21 1516.91 1518.23 1522.29 1524.33  
1525.72 1527.17 1528.47 1530.05 1533.19 1535.26  
1540.58 1583.15 1592.37 1608.03 1617.60 1623.56  
1656.48 2915.19 3012.71 3014.01 3016.99 3017.97  
3020.81 3029.27 3031.12 3033.70 3036.18 3037.92  
3039.22 3041.07 3043.81 3045.43 3046.50 3047.70  
3057.70 3058.28 3058.61 3063.82 3066.46 3069.77  
3071.04 3072.81 3075.22 3076.13 3081.27 3085.67  
3090.16 3093.21 3095.52 3102.82 3103.01 3104.27  
3109.57 3110.46 3111.74 3113.12 3115.65 3118.04  
3118.88 3122.29 3136.22 3140.26 3140.30 3142.49

3150.08 3150.28 3160.50 3164.11 3167.45 3167.67  
3175.71 3178.88 3189.65 3190.27 3194.90 3199.90  
3203.04 3207.59 3209.69

3176.32 3179.42 3187.31 3191.73 3197.08 3199.09  
3208.03 3209.93 3213.23

L3\_90

22.16 27.15 29.48 34.52 39.36 48.57  
50.35 55.70 60.84 64.02 68.83 74.76  
77.84 85.71 89.58 92.48 97.71 104.59  
110.03 114.40 119.06 125.58 126.18 140.45  
143.10 147.57 159.49 161.17 166.13 169.73  
176.70 184.90 192.47 194.26 200.40 201.70  
206.38 223.05 228.52 231.37 243.26 246.47  
251.43 259.03 263.56 266.42 273.67 275.06  
283.46 294.21 298.45 299.15 307.73 309.90  
312.71 316.42 326.55 334.63 348.33 357.37  
362.13 370.54 379.03 387.63 399.04 400.50  
410.24 413.52 419.08 440.55 443.77 451.26  
455.94 463.36 471.14 476.15 481.24 487.38  
498.29 511.28 521.97 529.98 534.70 552.79  
581.24 602.86 606.86 621.11 631.44 645.91  
661.62 672.45 675.99 701.40 721.43 722.57  
737.56 744.68 746.59 787.04 795.51 808.47  
814.16 816.99 823.88 827.78 828.42 836.85  
855.36 863.26 868.09 895.47 901.93 902.97  
904.48 908.13 911.94 915.45 920.88 933.54  
939.01 940.23 942.64 946.36 948.27 959.56  
962.02 966.57 973.86 976.87 981.73 983.11  
988.06 1007.15 1023.18 1025.83 1033.07 1039.57  
1041.00 1041.55 1045.74 1046.29 1061.19 1066.76  
1067.63 1071.79 1074.39 1083.23 1085.31 1091.51  
1093.36 1099.48 1102.82 1104.05 1107.13 1109.21  
1123.89 1125.57 1128.94 1132.42 1137.73 1138.80  
1156.01 1172.10 1185.55 1190.22 1192.11 1200.67  
1202.53 1209.43 1210.14 1210.96 1221.14 1233.91  
1240.14 1266.58 1269.72 1277.07 1284.34 1290.26  
1295.89 1296.75 1302.50 1311.80 1314.06 1314.75  
1316.06 1321.18 1326.23 1332.32 1338.82 1343.37  
1344.57 1345.33 1353.06 1367.29 1368.58 1368.93  
1377.29 1380.57 1382.93 1384.58 1392.58 1393.09  
1395.25 1396.28 1398.80 1405.43 1413.09 1413.96  
1416.00 1416.91 1418.20 1423.51 1435.57 1436.11  
1437.35 1438.74 1465.65 1474.25 1484.20 1486.73  
1492.44 1494.19 1498.40 1499.28 1499.53 1500.00  
1500.61 1500.86 1502.18 1503.59 1504.76 1505.72  
1506.28 1506.92 1508.15 1508.68 1511.33 1512.93  
1513.52 1514.76 1516.46 1518.13 1522.09 1524.29  
1524.87 1526.48 1528.44 1528.96 1531.13 1535.53  
1537.63 1586.17 1591.77 1606.26 1615.88 1621.19  
1655.74 2957.97 3012.24 3014.14 3016.54 3018.28  
3020.50 3029.11 3031.53 3033.96 3037.21 3037.88  
3039.36 3041.70 3042.55 3045.54 3046.24 3048.53  
3051.19 3054.23 3061.47 3066.31 3067.05 3069.29  
3070.71 3073.68 3077.99 3079.20 3083.50 3085.39  
3094.30 3094.71 3097.44 3099.35 3103.55 3104.38  
3109.72 3110.59 3112.13 3112.81 3115.28 3118.22  
3119.34 3122.89 3136.26 3140.36 3140.88 3141.29  
3151.89 3155.68 3159.42 3160.15 3168.82 3171.25

L3\_100

20.09 25.83 28.00 34.35 36.32 45.18  
48.00 54.65 56.29 62.54 66.54 70.35  
76.18 83.92 88.42 91.41 97.04 104.75  
110.43 112.64 116.93 118.52 125.87 133.68  
139.81 141.48 154.40 159.90 163.97 169.58  
175.65 181.45 187.68 194.28 199.14 199.47  
206.11 216.12 223.82 234.66 245.53 246.87  
249.33 254.49 258.06 266.36 272.41 272.72  
279.87 288.39 291.87 296.45 298.65 302.65  
311.82 313.10 323.83 333.70 347.70 353.14  
360.69 368.68 377.44 387.11 399.25 400.40  
408.74 412.96 416.06 439.82 443.53 450.12  
456.31 464.10 471.80 476.62 479.97 489.17  
497.45 510.72 522.33 529.08 535.89 555.65  
582.49 601.50 607.98 621.02 632.96 644.49  
662.01 672.12 676.11 699.80 719.23 721.80  
739.94 744.54 745.84 785.45 798.91 805.88  
813.40 817.02 823.01 827.86 830.37 836.85  
856.25 863.48 867.78 895.93 901.34 902.60  
904.25 907.02 910.41 915.68 919.49 935.59  
938.30 939.44 944.80 946.49 948.11 959.53  
962.61 967.53 974.11 976.45 979.33 983.74  
987.85 1006.78 1022.33 1025.71 1033.14 1039.27  
1040.06 1041.34 1045.14 1046.08 1062.78 1066.84  
1067.98 1071.20 1073.53 1083.36 1085.33 1091.62  
1092.63 1101.19 1103.48 1103.63 1108.57 1109.88  
1123.60 1124.49 1128.88 1130.52 1137.86 1138.67  
1155.51 1171.52 1186.17 1190.85 1192.14 1200.62  
1202.83 1209.98 1210.91 1211.33 1221.13 1233.49  
1239.37 1266.16 1270.35 1279.51 1286.38 1290.59  
1295.35 1296.16 1302.74 1311.91 1313.94 1314.42  
1323.04 1327.14 1331.73 1334.28 1338.76 1344.07  
1344.74 1350.56 1355.13 1367.69 1368.26 1368.92  
1376.58 1380.65 1383.25 1388.91 1392.72 1393.19  
1394.49 1396.64 1398.48 1405.88 1413.65 1414.69  
1417.00 1417.22 1420.46 1424.21 1435.39 1436.37  
1437.38 1439.93 1465.42 1475.04 1484.85 1487.85  
1493.54 1493.96 1497.81 1499.42 1499.68 1500.12  
1500.39 1500.98 1502.14 1502.99 1505.12 1505.39  
1505.77 1506.21 1507.09 1507.64 1510.82 1511.58  
1512.90 1513.55 1515.56 1518.27 1521.20 1522.92  
1524.24 1525.42 1526.08 1528.20 1529.65 1534.05  
1536.12 1585.62 1592.93 1607.66 1615.91 1620.93  
1656.56 3011.62 3015.08 3016.06 3019.06 3020.42  
3023.97 3028.79 3031.32 3033.55 3036.84 3037.90  
3039.65 3042.26 3042.56 3044.89 3046.07 3047.07  
3048.65 3049.98 3061.92 3064.70 3066.74 3067.84  
3068.74 3070.74 3078.66 3080.22 3084.99 3085.50  
3090.62 3091.22 3091.34 3101.70 3104.35 3104.50  
3110.30 3110.80 3111.65 3111.89 3115.82 3117.21  
3118.21 3119.56 3128.09 3134.36 3141.37 3141.49  
3144.47 3152.81 3161.85 3168.60 3173.06 3174.92  
3176.21 3178.53 3181.06 3195.01 3196.91 3196.99

3199.57 3208.28 3213.50

L3\_110

19.34 28.90 31.72 33.92 42.94 44.35  
46.80 49.83 59.27 63.52 67.56 72.87  
75.77 82.67 84.03 85.96 95.19 99.36  
104.03 107.81 115.10 119.46 124.04 134.49  
141.75 143.09 153.13 159.75 167.20 172.74  
175.34 178.08 183.03 191.66 194.16 199.55  
209.16 218.49 219.74 233.36 237.26 239.98  
250.23 255.33 259.54 263.95 266.98 268.46  
272.24 276.11 283.15 293.06 299.55 307.47  
311.99 315.27 332.42 335.35 338.43 358.84  
360.60 369.79 375.30 378.34 397.09 397.58  
408.53 413.68 416.39 421.73 441.80 450.47  
455.38 455.91 459.38 476.61 478.97 479.70  
488.58 504.75 517.84 529.71 534.39 549.90  
577.18 598.28 612.97 620.82 624.51 641.47  
657.07 672.27 672.96 695.09 716.62 719.12  
727.10 743.90 746.48 777.75 788.35 807.79  
808.91 810.99 820.49 820.94 827.41 830.49  
852.76 864.39 869.02 893.59 900.42 903.22  
905.13 907.33 910.45 913.23 919.30 926.37  
935.43 942.23 943.60 946.48 947.84 956.09  
959.76 963.16 970.28 971.25 973.59 980.44  
989.22 1008.11 1022.46 1025.21 1030.11 1036.12  
1039.48 1043.30 1043.76 1045.77 1053.99 1060.27  
1063.04 1071.43 1072.24 1079.37 1083.35 1091.14  
1094.01 1095.39 1103.57 1104.64 1106.26 1111.26  
1120.90 1124.55 1128.55 1129.37 1135.84 1140.11  
1145.70 1164.81 1183.93 1188.97 1192.03 1197.62  
1200.86 1210.77 1214.05 1214.47 1218.53 1231.87  
1236.35 1247.13 1265.64 1280.94 1285.42 1292.71  
1295.43 1298.96 1304.14 1304.41 1306.73 1310.91  
1318.59 1319.15 1333.58 1346.19 1348.16 1350.63  
1352.40 1355.36 1357.33 1364.57 1369.42 1372.29  
1376.15 1381.80 1389.51 1390.26 1393.25 1393.58  
1396.81 1397.25 1397.86 1410.27 1410.64 1411.87  
1415.69 1417.44 1420.41 1432.09 1434.89 1435.84  
1437.07 1438.06 1465.09 1472.98 1481.47 1485.91  
1491.85 1492.89 1495.15 1496.88 1497.19 1498.41  
1499.60 1499.95 1501.33 1501.76 1502.55 1502.74  
1504.02 1504.72 1506.03 1506.79 1507.85 1508.27  
1509.25 1512.04 1515.52 1517.39 1518.00 1519.11  
1521.47 1523.58 1523.87 1524.78 1525.85 1530.72  
1533.25 1584.05 1599.47 1606.31 1613.82 1621.95  
1656.92 3014.29 3015.87 3016.15 3016.63 3020.78  
3022.82 3025.79 3028.83 3030.56 3033.99 3036.70  
3037.95 3037.99 3039.66 3039.96 3041.98 3042.54  
3044.87 3048.77 3055.82 3066.40 3068.11 3069.24  
3070.93 3074.89 3078.26 3079.71 3083.06 3087.08  
3088.18 3090.06 3090.26 3093.08 3096.08 3102.33  
3102.88 3103.22 3108.89 3109.09 3113.65 3116.70  
3119.26 3123.88 3124.60 3126.08 3130.85 3133.88  
3135.10 3139.79 3154.02 3159.50 3167.83 3168.73  
3176.54 3177.91 3183.32 3195.28 3195.52 3195.66  
3211.63 3224.81 3276.65

L3\_120

19.88 27.60 30.98 35.23 43.46 44.34  
48.05 49.35 60.38 65.27 66.83 70.26  
75.73 79.37 85.12 87.62 94.81 98.65  
106.14 110.04 113.38 117.63 123.64 136.61  
140.75 142.84 153.07 161.79 164.84 174.10  
176.44 177.68 182.37 192.27 194.92 199.51  
205.58 219.09 220.24 232.77 238.59 240.89  
249.88 255.96 262.27 264.73 267.23 271.34  
273.60 276.83 281.65 294.17 301.16 307.98  
313.26 315.87 332.06 335.35 337.86 358.10  
358.96 370.06 378.99 385.08 398.43 402.62  
410.05 412.68 422.78 434.84 450.74 452.35  
456.57 459.17 465.82 477.32 479.36 481.62  
490.69 510.51 519.70 532.75 537.07 551.56  
581.97 604.90 610.89 620.82 625.54 643.24  
657.85 672.83 673.80 695.08 718.94 721.23  
734.07 743.51 752.08 782.99 792.00 808.99  
811.35 815.49 821.32 823.54 829.42 831.19  
855.23 865.50 869.16 894.73 900.57 903.61  
905.13 907.68 911.33 912.93 919.65 931.58  
936.31 943.57 943.92 946.70 948.61 957.86  
961.54 962.29 971.09 973.62 975.70 980.75  
988.02 1008.03 1023.06 1026.22 1032.72 1038.48  
1040.27 1043.90 1044.43 1045.57 1055.19 1061.27  
1064.32 1071.14 1072.45 1079.60 1084.63 1093.22  
1095.12 1102.58 1105.35 1105.88 1107.70 1111.74  
1122.62 1125.07 1128.74 1130.32 1136.61 1141.05  
1146.57 1167.66 1184.02 1189.37 1192.82 1200.74  
1201.81 1210.66 1214.35 1214.84 1219.51 1234.45  
1238.23 1247.68 1269.22 1282.47 1285.84 1294.42  
1296.67 1299.68 1305.15 1306.07 1311.75 1318.38  
1318.90 1320.34 1334.52 1347.02 1347.69 1351.49  
1352.37 1354.52 1357.46 1365.23 1369.51 1373.14  
1376.50 1382.75 1390.15 1391.61 1393.42 1393.79  
1397.09 1397.90 1404.06 1408.54 1412.05 1415.95  
1416.94 1417.76 1420.67 1432.66 1436.02 1436.54  
1437.58 1438.49 1466.21 1473.39 1482.25 1485.04  
1492.99 1493.34 1495.67 1497.32 1497.72 1498.68  
1499.75 1499.85 1501.61 1501.99 1502.47 1502.74  
1504.53 1505.05 1506.48 1507.13 1508.05 1508.71  
1509.64 1513.10 1515.76 1517.53 1518.18 1519.31  
1521.53 1523.92 1524.32 1524.93 1526.78 1529.82  
1533.52 1587.34 1600.18 1606.32 1615.80 1623.69  
1656.28 3014.95 3015.16 3015.21 3017.09 3020.32  
3022.51 3024.90 3028.01 3030.58 3034.25 3036.20  
3038.12 3038.40 3039.78 3040.95 3041.75 3043.34  
3046.02 3057.12 3057.17 3066.00 3067.85 3068.29  
3071.34 3074.85 3076.35 3078.38 3080.01 3084.16  
3085.65 3089.75 3092.39 3093.36 3094.51 3098.99  
3102.93 3103.43 3105.82 3109.13 3114.51 3116.75  
3118.66 3122.20 3124.12 3126.13 3130.18 3136.69  
3139.66 3140.11 3148.43 3160.02 3167.52 3168.89  
3177.10 3177.89 3180.78 3187.55 3194.66 3194.94  
3200.60 3222.77 3267.98

L3\_130

=====

|         |         |         |         |         |         |
|---------|---------|---------|---------|---------|---------|
| 14.70   | 26.11   | 30.14   | 33.86   | 39.92   | 44.22   |
| 47.48   | 48.57   | 58.68   | 64.28   | 67.68   | 70.53   |
| 75.50   | 78.68   | 85.54   | 90.05   | 95.22   | 99.46   |
| 106.55  | 109.17  | 110.80  | 115.64  | 125.06  | 136.90  |
| 140.48  | 141.32  | 153.29  | 160.59  | 162.80  | 173.45  |
| 175.97  | 177.49  | 181.97  | 190.06  | 194.31  | 200.03  |
| 201.49  | 218.83  | 220.64  | 230.27  | 237.25  | 239.53  |
| 248.79  | 255.75  | 260.05  | 263.23  | 267.82  | 270.14  |
| 271.96  | 274.91  | 278.66  | 291.37  | 302.48  | 303.53  |
| 313.18  | 314.76  | 331.53  | 335.61  | 337.25  | 355.93  |
| 358.99  | 369.51  | 378.73  | 385.32  | 398.82  | 405.80  |
| 412.66  | 413.97  | 423.74  | 435.37  | 451.32  | 453.42  |
| 456.68  | 460.36  | 468.57  | 478.02  | 480.12  | 483.42  |
| 490.00  | 511.49  | 520.18  | 534.70  | 537.64  | 555.00  |
| 583.62  | 607.16  | 609.98  | 620.85  | 626.38  | 643.43  |
| 657.98  | 673.61  | 673.93  | 697.41  | 717.78  | 721.13  |
| 737.93  | 744.82  | 754.47  | 782.26  | 793.74  | 809.32  |
| 810.58  | 817.74  | 820.96  | 824.39  | 830.43  | 836.36  |
| 856.50  | 865.69  | 869.31  | 895.04  | 900.68  | 903.26  |
| 907.84  | 908.34  | 911.15  | 912.58  | 919.98  | 935.12  |
| 936.34  | 943.14  | 943.89  | 946.63  | 949.24  | 959.13  |
| 962.53  | 965.94  | 970.70  | 973.49  | 976.80  | 980.13  |
| 988.65  | 1007.98 | 1023.04 | 1026.35 | 1033.36 | 1039.34 |
| 1040.72 | 1043.91 | 1044.38 | 1045.12 | 1054.94 | 1061.34 |
| 1064.48 | 1069.96 | 1072.24 | 1080.41 | 1085.10 | 1093.36 |
| 1094.48 | 1103.46 | 1105.79 | 1106.40 | 1108.68 | 1111.59 |
| 1123.48 | 1124.70 | 1128.64 | 1130.74 | 1137.09 | 1140.43 |
| 1146.26 | 1168.35 | 1184.16 | 1189.15 | 1193.05 | 1201.51 |
| 1202.13 | 1210.38 | 1214.07 | 1215.45 | 1219.88 | 1235.14 |
| 1238.19 | 1246.36 | 1270.18 | 1283.32 | 1286.42 | 1295.62 |
| 1297.59 | 1299.82 | 1305.38 | 1306.97 | 1311.34 | 1318.03 |
| 1320.29 | 1323.54 | 1334.56 | 1346.20 | 1348.80 | 1352.17 |
| 1353.19 | 1353.78 | 1358.53 | 1365.57 | 1369.21 | 1373.63 |
| 1376.12 | 1382.73 | 1390.31 | 1393.04 | 1394.20 | 1394.52 |
| 1396.58 | 1397.80 | 1404.67 | 1407.15 | 1411.89 | 1416.00 |
| 1417.68 | 1417.96 | 1420.51 | 1432.10 | 1435.63 | 1436.39 |
| 1437.70 | 1438.62 | 1466.47 | 1474.62 | 1481.64 | 1483.47 |
| 1493.08 | 1493.59 | 1495.73 | 1497.43 | 1497.85 | 1498.57 |
| 1499.54 | 1499.76 | 1501.15 | 1501.90 | 1502.26 | 1502.69 |
| 1504.32 | 1505.29 | 1506.60 | 1507.16 | 1508.39 | 1509.17 |
| 1509.77 | 1513.32 | 1515.64 | 1517.39 | 1518.07 | 1519.38 |
| 1521.26 | 1523.67 | 1524.13 | 1524.83 | 1527.25 | 1529.06 |
| 1532.78 | 1588.27 | 1601.72 | 1608.15 | 1616.15 | 1623.93 |
| 1657.57 | 3014.46 | 3014.64 | 3015.35 | 3017.91 | 3020.85 |
| 3021.21 | 3024.33 | 3028.94 | 3031.02 | 3034.44 | 3036.41 |
| 3038.32 | 3039.15 | 3040.29 | 3041.14 | 3041.21 | 3043.70 |
| 3046.36 | 3056.37 | 3065.15 | 3067.58 | 3067.96 | 3069.13 |
| 3071.98 | 3074.93 | 3077.52 | 3077.77 | 3078.95 | 3080.06 |
| 3085.82 | 3089.90 | 3092.25 | 3092.70 | 3093.71 | 3099.84 |
| 3103.14 | 3103.94 | 3104.88 | 3109.37 | 3114.61 | 3116.98 |
| 3118.11 | 3120.28 | 3123.24 | 3125.05 | 3128.86 | 3133.78 |
| 3139.39 | 3140.12 | 3146.25 | 3160.61 | 3167.02 | 3168.83 |
| 3177.76 | 3177.85 | 3178.54 | 3184.22 | 3193.05 | 3193.19 |
| 3194.90 | 3220.25 | 3250.83 |         |         |         |

=====

L3\_140

=====

|         |         |         |         |         |         |
|---------|---------|---------|---------|---------|---------|
| 19.96   | 26.86   | 28.66   | 32.62   | 37.24   | 40.16   |
| 43.27   | 49.86   | 55.51   | 60.51   | 65.92   | 70.00   |
| 70.83   | 72.16   | 83.83   | 86.78   | 88.90   | 95.78   |
| 100.35  | 106.25  | 112.25  | 121.03  | 125.21  | 129.33  |
| 136.88  | 145.27  | 146.39  | 150.97  | 156.43  | 163.09  |
| 169.38  | 179.41  | 182.33  | 184.23  | 194.02  | 201.09  |
| 201.59  | 203.51  | 213.95  | 225.94  | 231.06  | 234.23  |
| 240.96  | 249.58  | 251.77  | 253.76  | 257.03  | 265.04  |
| 268.23  | 270.18  | 273.00  | 280.56  | 295.18  | 301.96  |
| 310.71  | 318.95  | 321.50  | 335.28  | 342.93  | 353.86  |
| 364.01  | 372.24  | 378.88  | 391.89  | 394.33  | 397.78  |
| 410.64  | 413.96  | 427.79  | 439.91  | 447.18  | 449.53  |
| 455.16  | 465.04  | 471.54  | 476.32  | 481.96  | 489.85  |
| 494.85  | 509.95  | 519.39  | 531.02  | 533.50  | 556.04  |
| 583.15  | 608.74  | 611.16  | 620.81  | 630.53  | 643.73  |
| 658.64  | 672.92  | 675.64  | 697.46  | 714.12  | 714.51  |
| 740.16  | 745.08  | 750.36  | 783.13  | 795.60  | 808.24  |
| 812.42  | 818.30  | 823.63  | 828.61  | 831.14  | 837.31  |
| 856.80  | 865.19  | 869.31  | 896.28  | 901.63  | 902.63  |
| 903.61  | 908.07  | 910.01  | 913.46  | 914.56  | 935.19  |
| 936.90  | 939.89  | 945.73  | 946.70  | 946.85  | 958.28  |
| 964.33  | 966.33  | 973.36  | 973.82  | 974.53  | 980.34  |
| 987.52  | 1007.84 | 1024.21 | 1026.11 | 1030.92 | 1038.96 |
| 1041.04 | 1042.24 | 1044.58 | 1047.96 | 1051.71 | 1062.28 |
| 1065.97 | 1071.26 | 1071.92 | 1082.07 | 1083.88 | 1094.33 |
| 1095.31 | 1101.20 | 1103.15 | 1105.36 | 1106.45 | 1108.46 |
| 1122.39 | 1125.79 | 1129.05 | 1132.51 | 1137.19 | 1138.87 |
| 1155.15 | 1168.00 | 1185.80 | 1190.24 | 1193.13 | 1201.20 |
| 1202.80 | 1211.74 | 1212.50 | 1214.67 | 1219.35 | 1232.97 |
| 1237.74 | 1263.83 | 1265.60 | 1281.76 | 1286.44 | 1291.90 |
| 1293.16 | 1298.48 | 1303.28 | 1312.66 | 1313.52 | 1316.71 |
| 1320.35 | 1324.64 | 1329.11 | 1339.84 | 1349.56 | 1350.83 |
| 1352.91 | 1358.28 | 1359.27 | 1364.18 | 1369.36 | 1371.01 |
| 1378.24 | 1381.82 | 1387.52 | 1392.78 | 1393.52 | 1395.01 |
| 1396.24 | 1398.04 | 1399.51 | 1403.73 | 1406.47 | 1411.73 |
| 1414.01 | 1417.88 | 1419.10 | 1425.68 | 1435.08 | 1436.46 |
| 1437.04 | 1438.21 | 1467.00 | 1473.53 | 1480.62 | 1488.17 |
| 1491.70 | 1492.68 | 1493.97 | 1495.55 | 1497.39 | 1498.33 |
| 1498.92 | 1499.42 | 1499.77 | 1500.74 | 1502.65 | 1503.56 |
| 1504.33 | 1504.60 | 1505.06 | 1506.68 | 1507.07 | 1508.12 |
| 1509.27 | 1510.24 | 1511.77 | 1518.30 | 1518.69 | 1519.54 |
| 1522.04 | 1523.26 | 1523.99 | 1525.99 | 1526.58 | 1529.27 |
| 1533.07 | 1583.43 | 1601.88 | 1607.58 | 1615.48 | 1623.36 |
| 1656.87 | 3013.18 | 3015.07 | 3015.25 | 3019.83 | 3024.84 |
| 3025.13 | 3027.33 | 3030.02 | 3033.23 | 3035.08 | 3036.75 |
| 3038.40 | 3039.97 | 3042.40 | 3042.57 | 3045.19 | 3045.70 |
| 3047.02 | 3050.27 | 3058.80 | 3061.18 | 3068.36 | 3069.46 |
| 3072.05 | 3074.78 | 3075.32 | 3076.55 | 3077.39 | 3085.22 |
| 3089.49 | 3090.64 | 3094.42 | 3095.71 | 3096.62 | 3098.66 |
| 3103.40 | 3103.91 | 3109.50 | 3112.92 | 3115.86 | 3117.10 |
| 3118.22 | 3119.67 | 3120.37 | 3123.95 | 3131.85 | 3133.13 |
| 3139.56 | 3148.66 | 3149.83 | 3161.68 | 3167.68 | 3173.32 |
| 3177.51 | 3179.96 | 3183.26 | 3185.13 | 3191.27 | 3194.99 |
| 3204.30 | 3214.11 | 3228.02 |         |         |         |

=====

L3\_150

22.86 29.59 31.14 36.65 42.18 43.41  
49.14 52.58 54.96 59.57 68.77 71.58  
77.59 83.62 88.10 90.76 92.73 101.56  
106.13 109.74 111.91 118.20 125.20 138.73  
145.77 146.93 157.61 158.90 163.51 172.62  
174.97 181.28 183.50 188.12 193.69 197.88  
203.33 216.07 223.82 226.35 236.81 239.26  
246.00 248.69 254.86 261.13 269.55 271.21  
273.68 280.19 287.56 292.42 297.86 304.19  
314.50 315.57 328.80 337.65 338.32 353.79  
362.34 368.04 379.49 384.83 397.48 410.43  
417.65 424.38 426.39 429.20 450.09 453.57  
458.11 463.98 472.24 477.49 481.46 482.47  
488.47 512.59 524.04 534.27 538.43 554.74  
584.71 609.41 610.04 620.48 626.87 644.39  
658.62 673.32 673.53 700.80 714.20 724.92  
743.21 747.20 758.23 781.90 793.28 810.83  
812.02 820.28 821.01 829.15 831.25 842.74  
857.94 866.63 869.43 895.38 900.46 904.65  
907.03 910.49 912.75 913.47 918.75 935.51  
937.56 943.71 944.29 946.48 948.37 959.93  
962.83 971.64 973.30 973.58 975.79 978.85  
991.94 1007.25 1023.00 1027.99 1035.36 1038.63  
1039.30 1044.75 1045.32 1045.80 1054.22 1061.65  
1063.96 1066.00 1073.05 1081.45 1085.08 1092.62  
1094.59 1103.56 1105.07 1105.99 1111.96 1116.62  
1124.44 1125.42 1128.61 1132.99 1138.62 1140.13  
1147.15 1173.73 1184.79 1190.08 1192.83 1201.45  
1205.56 1209.44 1214.45 1217.09 1223.20 1239.17  
1241.20 1245.51 1269.49 1281.79 1286.29 1294.74  
1297.68 1299.84 1306.39 1308.08 1311.86 1316.30  
1319.47 1319.97 1337.74 1343.85 1350.55 1351.08  
1351.62 1354.46 1358.72 1366.91 1369.05 1373.18  
1376.61 1381.46 1388.76 1393.65 1394.02 1395.77  
1397.31 1399.20 1403.71 1407.48 1412.13 1414.29  
1415.64 1417.59 1419.65 1430.71 1433.19 1436.31  
1437.13 1438.74 1465.80 1474.85 1481.32 1483.76  
1493.23 1494.29 1496.11 1497.44 1497.90 1499.15  
1500.03 1500.44 1501.17 1501.92 1502.28 1503.95  
1504.30 1506.09 1506.78 1507.34 1508.84 1509.61  
1510.76 1513.63 1515.10 1518.10 1518.71 1520.48  
1521.11 1523.19 1524.14 1524.68 1528.86 1529.84  
1532.24 1585.66 1603.94 1608.91 1614.89 1621.47  
1657.80 3005.69 3014.96 3015.33 3016.64 3020.22  
3020.67 3024.62 3028.65 3030.47 3034.53 3036.00  
3038.70 3039.17 3039.92 3040.70 3043.02 3044.35  
3047.58 3064.45 3065.71 3066.39 3070.19 3071.48  
3074.28 3074.73 3077.83 3078.13 3079.92 3082.99  
3088.96 3090.59 3093.27 3093.96 3095.28 3098.17  
3103.47 3103.67 3103.83 3109.90 3114.96 3117.20  
3117.50 3117.86 3122.98 3126.00 3134.80 3135.13  
3140.11 3146.44 3148.25 3163.79 3164.22 3164.37  
3166.44 3170.91 3176.66 3178.62 3182.54 3194.81  
3196.57 3221.30 3228.10

=====  
L3\_160  
=====

22.91 28.59 32.51 37.08 40.22 43.60

49.51 50.52 56.06 60.31 68.84 72.07  
77.92 83.59 87.34 92.92 94.66 102.59  
105.81 108.55 112.13 117.94 124.07 138.91  
147.04 148.19 155.81 158.88 165.78 172.64  
176.16 182.76 185.42 186.84 192.88 199.15  
204.18 215.90 223.27 226.59 237.38 238.45  
241.92 247.79 254.83 261.55 267.86 270.89  
273.94 281.33 289.33 291.20 302.66 305.45  
313.96 317.47 328.43 337.91 338.80 354.44  
362.67 369.18 379.26 383.37 397.86 411.62  
419.50 425.49 427.48 434.55 449.89 453.86  
458.11 464.17 473.79 476.69 481.54 483.65  
488.74 512.45 525.79 535.19 538.60 555.40  
586.79 609.32 611.67 620.68 626.69 644.87  
658.50 671.79 673.38 701.94 712.54 727.91  
745.66 749.08 761.25 782.71 793.56 811.80  
814.21 820.57 821.68 829.77 831.07 844.38  
858.13 866.52 869.18 895.10 901.37 905.46  
907.53 910.15 912.97 914.24 919.45 935.92  
937.88 943.45 944.56 946.54 948.29 959.86  
962.51 971.59 973.61 974.85 975.37 978.37  
993.60 1007.10 1022.92 1028.54 1035.47 1038.35  
1039.08 1044.76 1045.39 1046.33 1053.31 1061.27  
1063.13 1065.42 1073.19 1081.53 1085.37 1092.69  
1093.65 1103.15 1105.10 1106.14 1111.41 1117.44  
1123.99 1124.86 1128.65 1132.10 1138.75 1139.78  
1147.32 1173.71 1184.71 1190.43 1193.11 1200.90  
1205.75 1209.38 1214.26 1218.53 1223.30 1237.99  
1241.90 1244.06 1269.74 1280.69 1287.02 1294.27  
1297.28 1300.25 1306.29 1308.15 1311.48 1315.49  
1318.78 1319.27 1338.27 1342.37 1348.42 1351.22  
1351.66 1355.30 1358.15 1367.00 1368.86 1372.01  
1376.89 1381.18 1389.03 1392.61 1394.24 1395.60  
1397.84 1399.75 1402.35 1404.88 1412.91 1415.43  
1415.67 1417.58 1419.33 1429.77 1432.36 1436.41  
1437.16 1438.81 1465.57 1475.61 1480.65 1483.44  
1493.44 1494.00 1496.26 1497.31 1497.94 1499.16  
1500.13 1500.66 1501.07 1501.74 1502.38 1504.14  
1504.77 1506.15 1506.62 1507.45 1508.78 1510.08  
1510.43 1513.21 1515.11 1518.28 1518.64 1520.91  
1521.19 1523.37 1524.21 1524.68 1529.07 1530.42  
1532.15 1584.19 1607.49 1609.21 1615.27 1620.91  
1658.84 2997.76 3014.52 3015.12 3016.17 3019.53  
3020.87 3024.76 3028.61 3030.25 3034.33 3036.22  
3036.50 3038.84 3039.79 3040.52 3043.00 3043.70  
3045.99 3060.69 3065.76 3067.53 3070.80 3071.00  
3072.37 3075.36 3076.17 3077.14 3079.08 3082.16  
3089.24 3090.75 3090.83 3093.20 3094.97 3098.56  
3103.18 3103.53 3103.58 3109.76 3114.20 3114.39  
3115.76 3117.34 3120.99 3123.20 3131.73 3135.19  
3140.24 3145.21 3152.27 3156.08 3157.31 3164.89  
3166.42 3167.64 3176.53 3180.81 3183.17 3192.81  
3196.67 3222.57 3235.20

=====  
L3\_170  
=====

15.04 25.24 29.57 33.82 39.00 43.33  
48.04 50.52 60.50 61.23 65.12 72.13

77.55 81.59 87.81 95.61 98.32 103.42  
106.88 112.79 113.95 115.87 131.19 136.79  
144.34 153.66 154.55 163.89 169.90 173.80  
175.81 185.22 192.06 193.37 203.02 208.75  
210.44 216.86 222.80 227.63 236.30 241.13  
247.12 254.67 262.70 266.45 268.47 273.09  
274.76 284.08 288.03 295.81 306.91 314.60  
316.55 319.46 332.43 339.00 342.90 353.10  
361.08 369.07 378.53 390.80 399.99 406.39  
412.45 414.77 425.11 430.42 450.23 453.10  
455.61 458.30 472.35 473.95 484.72 486.60  
494.96 507.49 529.56 532.81 534.98 555.26  
585.30 606.30 610.99 621.37 627.09 646.81  
657.54 673.61 677.06 701.84 708.55 720.76  
744.12 748.09 752.79 781.24 793.81 809.37  
816.71 820.83 826.51 827.31 829.32 841.60  
858.12 868.60 871.02 894.13 905.03 906.58  
907.81 908.68 911.14 916.12 919.97 933.62  
941.22 945.09 945.55 947.40 948.94 957.20  
961.88 968.81 969.93 973.97 974.43 976.87  
988.64 1008.56 1025.29 1026.89 1029.29 1037.95  
1042.65 1043.13 1044.75 1047.72 1049.67 1057.68  
1063.79 1072.03 1077.92 1083.39 1084.41 1095.02  
1100.75 1100.88 1101.94 1105.35 1113.44 1115.79  
1118.97 1124.30 1129.40 1129.66 1138.52 1143.84  
1156.27 1172.93 1185.69 1191.07 1193.08 1197.67  
1204.83 1208.95 1209.87 1219.99 1222.09 1231.31  
1238.19 1261.78 1269.27 1275.91 1286.21 1291.08  
1297.77 1303.98 1306.30 1308.75 1314.04 1317.39  
1322.60 1328.14 1339.92 1341.42 1345.04 1346.05  
1351.61 1353.33 1357.25 1368.40 1369.64 1371.46  
1380.25 1385.49 1389.24 1389.59 1390.53 1395.62  
1397.14 1398.78 1399.87 1403.20 1407.53 1413.23  
1415.40 1416.29 1417.39 1421.77 1433.19 1436.39  
1438.33 1439.53 1467.54 1474.46 1483.89 1485.28  
1492.32 1494.30 1495.33 1496.54 1497.62 1498.66  
1499.28 1499.83 1500.56 1502.61 1503.33 1504.84  
1505.47 1506.40 1507.17 1508.34 1508.96 1510.49  
1513.89 1515.70 1517.07 1518.23 1520.26 1521.05  
1525.09 1526.10 1526.47 1528.96 1529.84 1532.88  
1534.62 1585.57 1600.12 1606.30 1618.33 1624.44  
1658.50 2972.44 3014.05 3014.19 3017.85 3020.83  
3023.10 3025.24 3028.93 3029.09 3030.81 3034.73  
3036.56 3039.43 3041.94 3042.82 3043.29 3046.06  
3047.34 3049.80 3053.19 3057.59 3064.83 3065.24  
3066.27 3069.81 3071.96 3076.58 3077.26 3077.75  
3077.90 3078.65 3079.40 3090.83 3092.05 3098.15  
3100.28 3104.16 3104.57 3104.65 3110.46 3111.38  
3114.57 3116.20 3117.93 3132.56 3137.80 3141.39  
3141.88 3153.29 3162.41 3168.27 3170.11 3176.82  
3180.74 3185.83 3187.15 3193.73 3194.65 3199.07  
3205.01 3205.22 3230.79

=====  
L3\_180  
=====

14.51 25.83 27.63 31.85 39.54 44.34  
46.81 51.06 60.95 61.23 67.76 74.41  
79.49 85.27 90.38 96.08 98.69 104.17

105.65 112.15 115.20 116.74 129.66 135.18  
144.24 154.10 155.36 164.93 170.63 175.20  
176.95 187.01 191.64 194.40 202.86 210.23  
210.73 216.81 223.82 226.98 236.48 242.42  
248.78 256.14 262.16 266.94 274.13 275.33  
283.15 289.07 291.55 295.21 308.38 316.48  
318.85 320.35 333.64 339.93 344.19 353.48  
360.61 369.82 379.23 392.38 401.65 406.70  
412.13 414.89 423.50 429.43 450.67 452.87  
456.13 458.84 473.42 474.75 485.93 488.08  
496.16 508.59 530.06 532.92 534.81 555.66  
585.93 606.09 611.69 621.54 627.11 646.81  
657.73 673.62 676.60 702.61 707.67 721.65  
745.45 749.14 752.98 782.10 794.62 810.04  
815.18 821.24 825.42 827.45 829.34 841.05  
858.64 868.71 870.79 894.39 904.53 906.84  
907.69 909.14 910.35 916.07 920.70 932.93  
941.10 945.09 946.30 947.39 948.90 956.80  
962.02 968.93 970.54 973.40 974.43 976.87  
989.47 1008.57 1024.67 1026.79 1029.21 1037.55  
1042.06 1042.63 1044.25 1047.99 1050.28 1059.91  
1063.06 1071.78 1077.82 1083.45 1084.53 1095.99  
1100.61 1100.99 1101.37 1105.90 1113.78 1117.86  
1119.43 1125.22 1129.33 1131.61 1140.95 1143.18  
1156.27 1176.91 1185.90 1192.08 1193.27 1197.74  
1208.46 1208.92 1210.22 1219.50 1226.09 1229.36  
1249.16 1261.64 1273.66 1280.23 1286.52 1291.03  
1297.77 1304.10 1305.75 1308.20 1315.06 1317.67  
1326.32 1327.47 1339.35 1341.38 1345.15 1345.97  
1351.52 1354.39 1357.87 1367.77 1369.76 1371.32  
1380.98 1385.88 1389.03 1390.30 1391.18 1395.73  
1396.99 1398.88 1401.11 1403.55 1405.13 1413.32  
1415.93 1417.35 1419.98 1428.86 1432.65 1436.46  
1438.34 1440.33 1467.23 1474.36 1482.92 1486.94  
1491.71 1494.18 1495.59 1497.14 1497.39 1498.62  
1499.28 1500.04 1500.62 1502.99 1503.04 1505.07  
1505.40 1506.39 1507.03 1508.72 1509.01 1510.44  
1514.21 1514.97 1517.39 1518.34 1520.72 1520.95  
1525.20 1526.51 1526.93 1529.32 1532.33 1533.54  
1535.59 1588.67 1605.19 1607.43 1618.62 1624.30  
1658.69 2947.20 3013.52 3013.94 3018.91 3022.46  
3025.21 3029.15 3029.98 3030.17 3030.27 3034.57  
3035.95 3039.55 3042.59 3044.29 3046.81 3047.27  
3049.53 3051.07 3054.52 3066.11 3066.99 3068.07  
3069.96 3070.05 3073.20 3073.79 3076.83 3077.25  
3077.76 3079.85 3080.61 3093.57 3094.85 3098.17  
3099.47 3104.19 3104.46 3105.22 3110.51 3111.83  
3115.86 3116.04 3117.87 3134.18 3140.60 3141.49  
3146.93 3158.63 3161.58 3167.92 3175.24 3176.22  
3181.07 3185.37 3187.06 3187.84 3194.88 3195.94  
3205.15 3205.55 3230.49

=====  
L4\_0  
=====

16.69 28.77 34.68 39.74 51.08 56.15  
57.47 65.30 70.87 73.82 83.25 84.81  
87.67 97.64 101.91 105.70 108.40 111.79  
119.85 127.30 137.19 143.84 152.13 152.75

155.15 159.06 162.07 169.33 183.89 193.78  
205.71 206.93 212.00 220.55 227.19 231.31  
243.18 250.08 250.97 253.93 259.48 260.08  
261.73 265.64 266.67 271.69 273.42 273.85  
281.21 290.89 292.72 302.47 307.82 317.63  
320.98 326.96 335.21 336.19 354.18 355.80  
379.65 381.18 389.07 394.88 398.75 410.44  
412.23 418.02 426.48 431.49 450.71 452.81  
474.62 484.28 488.19 493.58 506.06 511.98  
556.58 568.40 571.25 589.72 599.55 624.24  
628.02 631.78 637.45 650.05 667.71 668.20  
678.11 705.89 730.26 743.88 779.93 781.33  
800.00 817.31 820.14 823.08 835.69 843.80  
857.36 896.56 903.90 905.86 907.81 918.82  
919.39 944.89 947.51 949.16 949.71 950.91  
953.02 954.92 960.08 966.49 967.70 974.08  
974.76 976.19 982.24 986.65 987.96 1009.33  
1040.87 1043.44 1044.16 1053.68 1055.74 1058.19  
1081.21 1082.07 1091.05 1103.44 1108.62 1122.90  
1125.99 1128.95 1131.41 1141.52 1159.45 1179.70  
1180.87 1189.43 1191.72 1193.59 1202.52 1203.58  
1204.69 1209.40 1213.83 1219.12 1223.71 1226.78  
1231.79 1234.26 1241.82 1248.62 1283.57 1289.00  
1291.15 1301.32 1311.42 1316.34 1346.86 1348.39  
1349.34 1351.79 1358.56 1362.22 1377.16 1402.89  
1408.06 1414.27 1415.14 1416.25 1416.89 1421.32  
1422.72 1434.16 1435.99 1438.19 1440.82 1449.39  
1454.61 1461.19 1466.89 1481.83 1489.01 1491.86  
1492.98 1494.70 1498.09 1498.49 1500.72 1501.05  
1503.37 1503.81 1504.41 1504.92 1505.42 1505.98  
1506.65 1507.61 1508.83 1510.30 1513.46 1514.89  
1515.68 1517.00 1517.63 1520.29 1522.72 1523.86  
1524.61 1525.11 1526.92 1528.38 1539.54 1545.38  
1598.50 1620.88 1624.44 1629.40 1637.95 1661.58  
3005.47 3014.84 3030.11 3033.34 3033.95 3034.72  
3035.60 3037.56 3037.97 3038.99 3041.40 3041.99  
3042.99 3047.87 3050.10 3067.56 3079.89 3093.79  
3094.59 3100.61 3102.32 3104.62 3107.73 3109.55  
3110.06 3113.23 3116.80 3118.68 3120.76 3124.17  
3124.82 3127.75 3134.04 3134.91 3136.82 3143.08  
3144.63 3148.93 3150.27 3153.10 3162.86 3171.12  
3179.63 3181.64 3186.23 3186.96 3190.16 3191.68  
3195.13 3204.73 3215.14 3218.54 3220.98 3233.81

L4\_10

11.69 30.32 41.11 42.26 51.00 53.87  
57.80 63.64 69.95 74.44 80.68 82.95  
86.87 89.47 100.57 101.74 107.98 111.83  
120.78 126.28 135.36 142.37 149.67 151.00  
156.12 159.71 163.38 167.09 186.96 196.47  
207.02 209.89 214.28 223.92 225.36 232.61  
241.54 247.83 251.79 252.46 257.95 261.03  
262.50 265.01 267.01 268.35 271.22 273.88  
277.32 290.46 294.51 297.38 304.97 316.15  
320.74 326.03 334.99 337.47 351.02 351.57  
380.26 381.65 388.03 393.92 400.27 409.32  
410.11 419.69 428.19 430.87 450.07 451.84

473.94 484.35 489.32 494.40 506.17 510.57  
556.76 566.79 570.61 587.44 600.19 624.08  
625.86 633.37 637.15 650.08 667.93 668.47  
677.65 707.90 730.60 750.00 779.49 781.29  
800.79 815.51 819.99 822.53 834.90 849.25  
856.78 896.13 903.38 905.85 911.97 918.29  
920.02 943.54 948.20 949.18 949.79 950.59  
953.47 955.33 960.40 966.92 970.33 974.46  
974.59 975.90 982.96 985.21 990.86 1008.07  
1037.02 1043.08 1044.15 1052.65 1055.32 1058.11  
1080.37 1080.77 1091.37 1101.73 1108.15 1123.13  
1125.86 1129.70 1132.44 1141.62 1159.45 1179.45  
1180.60 1189.55 1191.67 1193.47 1201.28 1203.83  
1205.33 1208.76 1213.84 1219.13 1223.45 1225.17  
1230.40 1235.10 1240.46 1250.23 1283.90 1288.79  
1292.07 1301.72 1308.09 1313.50 1346.30 1346.60  
1349.12 1352.17 1360.40 1361.15 1377.50 1403.81  
1408.40 1413.76 1414.86 1415.30 1415.84 1420.86  
1422.76 1434.34 1435.33 1437.22 1441.66 1448.70  
1453.89 1461.19 1465.17 1481.75 1487.58 1492.25  
1493.36 1495.37 1496.37 1498.29 1499.95 1502.00  
1502.10 1502.73 1504.16 1504.67 1505.30 1505.58  
1505.93 1507.39 1507.94 1508.66 1513.56 1514.88  
1515.12 1516.30 1517.12 1519.68 1522.52 1522.96  
1524.25 1525.51 1526.84 1529.05 1537.52 1544.47  
1597.43 1615.52 1618.51 1629.20 1638.28 1661.04  
3004.48 3013.85 3030.91 3032.11 3033.02 3033.14  
3034.80 3036.37 3037.75 3038.71 3039.82 3040.96  
3041.69 3047.20 3049.40 3066.19 3078.97 3090.77  
3092.78 3098.88 3101.95 3102.79 3106.19 3107.84  
3110.63 3112.46 3117.21 3117.96 3120.06 3120.72  
3124.21 3126.92 3129.71 3132.70 3133.66 3141.89  
3143.77 3145.24 3149.23 3149.74 3154.77 3157.80  
3173.28 3177.21 3179.33 3181.07 3183.58 3185.14  
3188.51 3196.08 3203.31 3214.68 3218.28 3233.75

L4\_20

12.28 25.68 40.83 41.70 50.64 52.92  
57.03 62.68 71.54 75.69 78.90 81.17  
83.01 90.99 98.19 100.15 105.89 110.19  
122.43 126.19 133.69 140.94 146.47 149.54  
153.23 159.64 162.38 166.59 185.20 200.88  
209.39 210.29 215.01 223.59 228.78 233.04  
242.47 248.31 250.43 252.34 258.09 261.04  
262.70 264.47 265.96 267.53 270.78 274.35  
276.79 291.12 295.43 298.51 304.85 317.44  
320.16 326.75 334.44 337.86 347.75 352.26  
379.47 381.34 391.34 399.35 402.63 407.82  
410.15 420.85 429.55 432.76 450.54 451.58  
472.37 484.20 489.04 493.65 505.38 510.36  
556.24 567.62 570.55 586.54 600.14 623.46  
624.03 634.85 638.45 649.88 668.14 668.45  
676.73 708.05 731.00 750.97 778.60 782.38  
800.78 813.72 819.58 820.85 834.72 849.41  
856.86 896.04 902.84 905.99 912.36 918.91  
920.52 942.49 947.87 948.97 949.46 950.05  
952.77 954.65 960.86 966.11 970.97 974.51

974.60 975.86 982.96 985.05 991.21 1008.01  
1036.38 1042.63 1044.09 1052.85 1054.86 1058.12  
1079.62 1080.11 1091.20 1101.07 1107.29 1122.24  
1125.85 1130.02 1132.14 1141.36 1159.58 1179.10  
1180.44 1189.55 1191.46 1193.47 1200.57 1203.92  
1204.85 1208.60 1213.53 1218.91 1222.99 1224.46  
1228.44 1234.71 1239.53 1249.85 1285.18 1287.99  
1292.15 1302.79 1307.28 1312.09 1345.73 1345.86  
1348.09 1350.56 1359.84 1361.13 1375.92 1402.90  
1409.09 1413.15 1415.08 1415.46 1415.89 1421.13  
1422.95 1432.98 1435.22 1437.34 1437.39 1448.87  
1454.23 1460.49 1464.95 1480.71 1487.65 1492.21  
1492.80 1494.50 1495.21 1498.55 1499.72 1501.79  
1502.02 1502.79 1503.66 1505.00 1505.34 1505.62  
1506.09 1507.69 1508.15 1508.81 1513.24 1514.75  
1515.51 1516.42 1517.24 1519.19 1521.63 1523.63  
1523.77 1525.80 1526.71 1528.26 1538.81 1544.88  
1597.17 1614.34 1617.61 1629.08 1636.32 1660.25  
3004.76 3013.23 3030.62 3032.10 3032.64 3033.09  
3034.81 3035.76 3038.54 3039.14 3039.28 3041.08  
3041.52 3047.36 3049.70 3066.68 3078.25 3087.59  
3091.36 3098.52 3101.16 3103.48 3105.85 3107.62  
3109.75 3111.55 3116.37 3118.18 3120.07 3121.59  
3126.15 3126.44 3126.88 3130.87 3132.37 3142.75  
3145.85 3146.12 3147.88 3149.01 3156.04 3157.11  
3166.25 3177.37 3178.54 3178.98 3182.83 3184.07  
3188.42 3199.04 3201.95 3206.07 3217.94 3233.39

=====  
L4\_30  
=====

11.83 17.63 35.75 42.78 49.47 53.62  
56.76 59.33 69.17 73.44 76.85 80.14  
83.83 91.44 94.97 96.87 102.22 106.66  
120.90 123.97 130.63 137.73 143.06 147.16  
152.29 158.62 161.20 167.30 185.12 203.79  
209.10 210.04 218.55 223.19 234.12 239.77  
244.20 248.22 249.89 250.40 259.34 259.77  
261.33 262.58 264.19 266.88 270.11 275.00  
275.17 291.89 294.10 299.46 309.40 317.90  
319.32 326.91 330.89 334.41 342.45 354.44  
378.58 380.78 391.74 399.10 402.84 406.87  
413.93 419.10 427.97 437.71 450.13 451.69  
470.72 484.00 487.89 492.07 503.46 511.17  
555.40 567.99 570.64 584.36 599.35 620.34  
623.58 635.84 639.54 649.63 668.69 669.38  
675.37 704.42 731.23 747.83 777.82 782.80  
799.97 813.43 819.26 820.34 834.31 843.37  
856.56 896.26 902.32 905.68 907.78 920.33  
920.74 942.51 947.62 948.45 949.13 950.07  
953.14 954.74 961.24 965.35 966.53 974.30  
974.90 975.73 983.00 985.94 988.76 1008.32  
1038.33 1042.53 1044.02 1052.45 1053.89 1058.58  
1076.97 1081.29 1090.54 1101.38 1106.22 1121.39  
1125.95 1130.18 1132.32 1141.09 1159.18 1178.99  
1179.72 1189.42 1191.28 1193.12 1198.77 1203.88  
1204.21 1208.22 1213.26 1218.36 1222.47 1223.82  
1227.63 1234.59 1238.35 1249.27 1286.26 1287.64  
1292.53 1304.24 1306.79 1312.36 1345.60 1346.14

1348.16 1349.91 1358.64 1359.78 1374.29 1401.60  
1410.78 1412.41 1415.50 1416.22 1416.60 1420.70  
1423.10 1430.41 1432.89 1436.71 1438.42 1448.57  
1454.53 1459.90 1465.38 1478.75 1487.96 1491.48  
1492.62 1493.46 1494.97 1497.51 1499.60 1500.97  
1502.08 1502.92 1503.68 1504.57 1505.34 1505.70  
1506.17 1507.42 1508.44 1509.41 1513.57 1514.98  
1516.17 1516.41 1517.74 1518.95 1520.55 1523.74  
1524.14 1525.89 1526.55 1528.18 1540.83 1544.98  
1598.41 1615.88 1620.52 1627.05 1635.27 1659.51  
3005.74 3013.67 3031.08 3032.09 3033.43 3033.92  
3034.22 3037.58 3037.84 3038.86 3040.06 3041.01  
3041.11 3046.81 3049.14 3067.69 3078.94 3083.04  
3090.64 3100.29 3101.75 3102.26 3107.10 3108.58  
3109.75 3111.84 3113.90 3116.95 3120.80 3121.95  
3122.18 3128.19 3129.91 3136.31 3137.76 3141.18  
3144.15 3145.44 3149.59 3153.66 3155.30 3163.82  
3167.14 3176.39 3180.55 3181.82 3184.72 3189.02  
3194.89 3197.82 3200.47 3202.67 3217.57 3232.78

=====  
L4\_40  
=====

12.14 21.91 36.11 49.08 53.58 55.94  
57.73 61.57 68.35 74.57 78.03 79.87  
86.00 89.46 93.52 96.34 100.95 112.52  
117.23 122.48 127.43 132.14 143.69 144.71  
151.81 156.09 164.74 165.74 185.63 197.24  
203.25 208.65 217.30 223.90 239.01 240.21  
246.10 248.89 252.32 256.08 259.48 259.66  
263.14 265.46 268.39 270.60 273.19 279.54  
282.57 294.69 295.55 298.67 313.46 318.00  
319.92 327.61 331.31 335.00 344.77 360.27  
376.47 380.33 391.53 396.41 403.63 409.32  
415.01 419.59 426.09 436.81 449.93 451.36  
468.14 482.34 484.77 491.16 500.68 514.14  
554.61 568.14 570.00 583.03 597.65 617.30  
622.73 636.49 640.83 647.85 667.62 670.32  
672.07 703.69 732.13 745.66 773.53 784.67  
798.57 811.50 817.93 820.59 833.69 841.33  
857.20 895.94 901.17 905.36 908.30 920.12  
922.37 942.49 947.72 948.53 950.02 950.54  
951.96 953.78 962.14 963.06 966.33 974.41  
975.50 975.83 982.47 986.34 987.11 1008.19  
1040.16 1042.21 1044.16 1052.43 1054.10 1058.72  
1073.54 1082.09 1090.23 1101.65 1105.00 1120.37  
1126.95 1131.03 1133.08 1140.25 1159.15 1178.39  
1179.73 1189.79 1191.55 1193.85 1197.00 1203.84  
1204.67 1208.46 1212.63 1218.80 1222.88 1223.18  
1226.12 1233.85 1237.45 1250.28 1284.07 1288.36  
1292.61 1299.22 1305.45 1316.23 1342.04 1345.33  
1347.57 1348.98 1359.08 1360.24 1373.58 1399.03  
1410.37 1413.87 1415.26 1416.03 1418.61 1421.05  
1421.35 1423.93 1430.72 1435.89 1440.31 1448.70  
1455.73 1458.40 1466.53 1477.11 1488.56 1489.00  
1492.07 1493.64 1496.12 1496.51 1498.90 1501.50  
1502.68 1504.40 1505.13 1505.75 1505.87 1506.54  
1506.71 1507.22 1508.89 1510.91 1514.13 1515.71  
1517.12 1517.58 1518.36 1519.02 1520.92 1524.48



1525.47 1526.19 1527.84 1529.11 1541.02 1546.76  
1600.52 1617.46 1623.56 1625.15 1634.49 1660.26  
3006.56 3015.34 3029.57 3030.53 3032.40 3033.50  
3034.48 3035.29 3035.62 3038.70 3041.03 3041.66  
3043.40 3044.17 3049.81 3068.90 3075.86 3080.14  
3090.30 3095.95 3100.06 3102.87 3104.47 3104.56  
3107.74 3111.40 3112.18 3114.16 3120.49 3121.91  
3130.71 3131.34 3132.52 3137.19 3137.70 3138.83  
3140.80 3141.91 3148.09 3148.42 3161.37 3169.91  
3177.71 3181.99 3183.10 3185.25 3186.57 3189.64  
3192.27 3200.05 3206.07 3207.92 3219.29 3234.55

L4\_50

20.29 27.98 34.65 40.41 48.12 52.58  
58.27 60.90 70.00 76.35 82.96 84.49  
88.03 90.57 94.55 102.05 111.62 115.37  
126.09 127.42 133.78 139.04 146.66 150.62  
157.15 165.12 169.90 179.98 181.31 182.94  
195.14 201.16 205.26 218.26 226.41 231.11  
235.35 241.65 249.88 252.08 256.49 258.32  
262.95 266.86 271.09 272.16 275.95 278.34  
288.00 292.81 293.79 303.74 306.71 313.08  
315.49 320.05 330.59 340.89 347.71 349.11  
365.29 379.07 380.46 391.92 399.81 405.29  
417.94 421.66 425.47 436.30 452.85 457.29  
477.09 482.01 485.41 491.23 503.54 516.71  
555.62 564.53 570.58 593.43 607.20 620.50  
622.44 630.65 634.93 641.80 666.05 667.90  
674.33 706.74 732.96 747.81 768.31 784.12  
802.43 817.12 821.63 824.72 829.94 847.36  
856.46 891.31 897.11 904.39 914.63 920.42  
922.53 936.16 941.18 946.78 949.11 951.77  
954.06 957.44 958.95 960.90 967.59 975.17  
975.51 976.52 986.24 990.65 995.68 1009.41  
1041.57 1041.76 1046.97 1052.16 1055.01 1060.81  
1071.24 1082.95 1087.20 1100.98 1105.08 1112.81  
1119.30 1128.35 1129.32 1139.47 1156.54 1179.41  
1179.87 1188.48 1190.91 1194.05 1199.32 1202.14  
1204.95 1211.00 1215.15 1220.10 1220.41 1224.49  
1229.42 1240.55 1246.12 1251.36 1268.05 1285.00  
1287.09 1293.51 1299.49 1320.50 1333.20 1333.86  
1346.04 1346.96 1348.34 1359.67 1367.64 1395.20  
1406.50 1410.72 1415.68 1416.00 1418.11 1418.26  
1420.79 1422.13 1435.44 1437.24 1444.40 1447.32  
1453.73 1456.72 1466.67 1471.81 1484.99 1488.83  
1492.81 1494.01 1496.70 1498.39 1500.92 1501.31  
1503.29 1503.55 1504.04 1506.12 1506.24 1507.00  
1507.39 1507.49 1509.77 1512.36 1516.29 1517.21  
1517.63 1518.05 1518.58 1520.84 1522.40 1525.68  
1525.96 1527.05 1527.79 1534.66 1540.97 1546.89  
1600.14 1616.66 1623.74 1624.44 1634.85 1655.30  
3009.55 3016.98 3030.42 3034.34 3034.60 3035.93  
3038.78 3039.14 3039.58 3041.07 3041.78 3042.37  
3046.70 3048.51 3050.32 3070.44 3073.56 3083.27  
3093.29 3096.00 3099.47 3099.53 3100.58 3104.78  
3109.44 3109.66 3111.63 3113.07 3115.47 3121.05  
3123.15 3131.03 3131.51 3135.97 3145.02 3146.06

3147.51 3150.44 3158.23 3165.18 3166.93 3173.74  
3176.43 3176.58 3181.70 3191.48 3193.84 3193.87  
3216.56 3224.65 3232.05 3236.52 3239.97 3243.81

L4\_60

24.98 26.89 30.50 40.19 44.49 48.51  
50.95 54.62 61.00 67.81 74.59 80.20  
80.47 86.93 92.67 97.57 111.15 111.91  
117.52 129.27 131.27 137.74 144.34 153.62  
159.40 163.92 173.15 176.48 181.60 187.91  
194.39 200.69 203.97 218.54 224.60 231.23  
237.88 241.51 242.35 253.77 258.33 264.57  
266.46 270.57 272.74 273.04 276.87 279.16  
287.72 297.86 298.52 301.25 303.23 313.81  
318.36 322.96 331.64 340.64 344.59 346.75  
368.52 378.45 382.79 392.37 399.70 404.87  
416.82 421.05 426.36 439.74 452.72 458.99  
476.89 482.33 486.24 493.13 503.34 516.74  
555.77 563.96 569.58 591.49 605.67 618.29  
621.99 630.99 637.25 643.87 665.00 669.67  
676.03 704.03 732.53 747.45 769.01 783.69  
803.80 813.70 821.92 825.61 829.90 847.15  
856.48 889.45 896.31 903.94 913.75 916.03  
923.65 933.95 942.99 946.49 947.59 951.28  
955.05 958.30 960.25 960.67 967.27 975.97  
977.03 977.15 986.25 991.10 996.53 1009.32  
1040.68 1042.31 1046.19 1051.20 1055.26 1063.95  
1069.71 1083.94 1086.57 1101.37 1104.38 1110.23  
1117.57 1128.12 1128.32 1139.86 1157.46 1178.96  
1179.93 1188.06 1190.89 1194.16 1199.15 1200.84  
1204.80 1211.35 1214.44 1217.46 1220.43 1224.34  
1227.93 1240.86 1247.22 1250.20 1266.39 1286.09  
1289.14 1297.06 1301.06 1320.74 1331.21 1333.61  
1341.62 1346.70 1348.01 1361.24 1367.66 1393.37  
1407.74 1411.33 1414.23 1415.94 1416.36 1416.47  
1421.02 1423.31 1435.65 1439.34 1444.80 1446.56  
1454.36 1456.71 1466.97 1471.69 1486.03 1488.44  
1492.19 1494.24 1496.71 1499.67 1500.31 1500.99  
1503.22 1503.76 1504.75 1505.62 1506.82 1507.22  
1507.54 1507.71 1510.40 1512.86 1516.95 1517.40  
1518.36 1518.58 1518.99 1520.42 1522.57 1526.56  
1526.85 1527.59 1528.51 1536.46 1540.70 1550.57  
1602.85 1616.25 1622.43 1624.40 1634.53 1656.33  
3009.62 3015.78 3029.50 3031.59 3034.13 3034.94  
3035.86 3037.06 3039.88 3040.99 3041.38 3041.64  
3043.52 3048.43 3050.80 3073.63 3081.21 3082.14  
3087.12 3092.20 3096.27 3098.44 3099.54 3103.21  
3105.29 3110.02 3111.42 3113.62 3114.33 3118.36  
3120.55 3132.27 3132.34 3134.08 3145.86 3147.32  
3149.31 3151.62 3156.73 3164.98 3170.75 3173.52  
3177.38 3181.42 3184.43 3191.42 3193.55 3193.89  
3218.07 3223.17 3226.35 3229.17 3238.40 3245.47

L4\_70

21.07 21.60 28.26 39.06 41.57 48.79  
50.88 53.88 58.70 63.38 70.56 73.81

79.29 85.04 91.89 93.24 107.89 112.42  
 112.96 127.67 129.65 137.61 141.42 152.15  
 157.77 161.14 171.86 173.37 179.05 189.17  
 193.41 197.18 204.37 212.21 220.79 227.93  
 234.97 236.33 247.89 252.80 256.26 264.03  
 266.70 270.21 273.23 276.35 280.10 283.41  
 285.35 298.12 301.73 302.66 303.25 312.57  
 316.47 328.95 330.91 336.18 341.90 348.54  
 369.44 377.97 383.31 392.25 398.77 405.64  
 414.69 422.63 426.98 445.36 450.56 458.07  
 475.99 483.28 485.85 492.51 503.22 517.45  
 554.48 560.44 567.69 589.90 603.43 615.71  
 621.79 629.97 638.60 645.23 664.97 670.67  
 675.28 702.39 732.79 747.10 767.79 782.17  
 805.14 809.23 822.66 826.64 830.04 845.41  
 856.22 889.41 895.70 903.22 908.60 914.94  
 924.85 929.65 942.03 946.17 946.78 950.89  
 951.93 959.59 960.19 960.73 969.85 976.37  
 976.85 977.94 983.14 991.32 999.62 1009.18  
 1039.16 1041.97 1043.96 1050.55 1054.95 1064.32  
 1068.62 1083.70 1086.28 1101.50 1103.19 1111.56  
 1115.24 1127.11 1128.52 1139.40 1157.06 1178.11  
 1180.24 1186.85 1191.00 1194.39 1196.62 1199.27  
 1203.82 1211.17 1212.72 1213.76 1220.61 1223.76  
 1225.07 1242.30 1245.71 1248.41 1264.87 1286.19  
 1291.38 1299.70 1302.69 1321.39 1329.21 1335.46  
 1337.79 1345.46 1348.54 1363.41 1368.55 1393.23  
 1406.33 1409.60 1411.56 1414.34 1416.11 1416.38  
 1420.75 1423.99 1435.72 1438.17 1444.49 1445.42  
 1454.15 1456.14 1466.96 1470.18 1484.94 1487.31  
 1492.19 1494.41 1497.00 1498.90 1499.59 1500.71  
 1502.56 1503.81 1504.70 1505.66 1506.52 1507.24  
 1507.68 1508.07 1510.32 1513.89 1516.65 1517.71  
 1518.62 1518.97 1519.60 1520.54 1522.69 1524.96  
 1526.36 1527.54 1528.26 1535.29 1543.01 1550.23  
 1602.34 1616.10 1621.19 1624.75 1636.45 1655.81  
 3009.90 3015.85 3026.62 3030.17 3033.76 3034.58  
 3035.32 3035.86 3039.30 3040.28 3040.70 3041.02  
 3043.46 3048.06 3050.48 3073.74 3079.00 3082.33  
 3083.95 3094.23 3098.26 3098.31 3100.12 3105.62  
 3109.21 3110.54 3110.74 3112.85 3113.36 3122.70  
 3124.64 3129.14 3130.77 3140.13 3143.29 3146.57  
 3148.71 3156.87 3164.85 3167.88 3170.50 3173.83  
 3175.89 3182.70 3187.07 3190.05 3193.94 3194.19  
 3214.83 3223.37 3224.45 3227.68 3238.70 3249.07

=====  
 L4\_80  
 =====

10.25 19.34 25.11 32.98 44.27 48.07  
 52.61 58.87 59.81 65.79 71.76 77.96  
 85.36 88.62 98.23 99.02 104.49 111.67  
 119.02 126.42 133.28 136.50 144.64 149.81  
 154.55 163.96 169.59 172.37 181.03 188.30  
 192.11 200.37 205.38 209.87 224.17 229.91  
 233.26 240.17 243.59 252.75 255.14 260.80  
 268.32 269.18 275.51 281.92 283.49 290.51  
 297.56 300.16 305.67 308.10 314.63 318.38  
 325.93 330.69 336.95 341.16 348.66 356.58

373.65 380.23 387.96 390.10 404.19 412.73  
 415.76 425.67 431.42 452.80 454.54 462.17  
 475.56 483.02 490.53 496.96 505.69 521.86  
 554.49 556.06 571.86 587.65 601.92 614.29  
 621.08 632.60 633.12 650.68 662.19 673.58  
 678.65 700.24 732.13 747.64 770.11 779.61  
 801.12 804.37 820.68 827.99 829.06 843.59  
 854.83 892.08 897.13 903.20 911.84 912.93  
 921.36 924.62 943.21 947.42 949.60 950.89  
 953.17 960.81 961.13 964.23 971.47 973.26  
 974.55 978.40 983.37 990.63 1003.34 1008.87  
 1035.93 1040.78 1041.65 1051.89 1055.48 1061.85  
 1068.92 1085.24 1086.68 1100.35 1103.57 1110.79  
 1113.43 1125.83 1128.16 1138.93 1157.05 1178.75  
 1179.08 1185.65 1190.77 1192.44 1193.49 1198.80  
 1200.62 1207.12 1209.43 1212.56 1219.57 1220.54  
 1222.88 1243.84 1246.49 1247.13 1261.30 1274.81  
 1287.36 1295.11 1299.06 1318.52 1323.49 1336.50  
 1337.49 1346.60 1351.02 1357.37 1366.24 1386.90  
 1394.15 1409.60 1411.47 1415.40 1415.76 1416.69  
 1421.29 1426.47 1435.95 1436.84 1442.36 1447.80  
 1455.01 1458.39 1467.29 1471.92 1480.35 1487.42  
 1493.57 1495.76 1499.00 1499.58 1500.07 1501.16  
 1503.67 1504.50 1505.34 1506.10 1506.29 1507.28  
 1507.77 1508.19 1510.41 1514.58 1518.10 1518.38  
 1519.49 1520.62 1521.32 1521.69 1523.51 1523.72  
 1527.89 1530.01 1534.36 1535.51 1545.39 1551.66  
 1600.19 1613.82 1616.79 1625.91 1634.70 1655.36  
 2998.79 3010.37 3011.46 3030.54 3031.30 3032.02  
 3033.67 3035.45 3037.96 3038.44 3038.97 3039.84  
 3042.98 3046.76 3049.03 3056.62 3074.55 3077.80  
 3078.26 3083.10 3095.51 3097.51 3099.90 3104.91  
 3104.96 3110.26 3110.33 3110.82 3111.72 3113.09  
 3114.10 3128.50 3132.89 3142.28 3144.01 3147.29  
 3147.94 3155.49 3165.17 3169.76 3172.48 3172.64  
 3174.15 3184.01 3185.61 3192.87 3193.64 3212.35  
 3214.16 3215.08 3216.80 3223.47 3239.07 3268.04

=====  
 L4\_90  
 =====

10.70 24.05 29.33 32.82 39.45 48.40  
 52.50 59.16 64.45 66.44 76.87 79.02  
 81.92 93.33 96.52 102.57 112.11 113.19  
 116.38 125.48 135.41 137.48 138.52 147.85  
 158.66 164.52 175.64 181.83 188.60 193.10  
 202.51 205.06 211.78 219.57 229.90 236.75  
 242.30 245.13 249.57 251.84 255.13 261.41  
 263.51 267.51 270.32 271.64 275.59 290.56  
 291.59 298.00 301.63 305.96 309.79 316.51  
 321.00 325.52 336.88 337.01 345.26 360.36  
 378.17 381.81 389.13 399.51 404.82 411.05  
 413.36 416.36 424.52 452.24 459.72 468.16  
 477.68 480.18 487.67 495.97 506.14 521.58  
 552.59 560.18 566.59 578.55 587.68 612.80  
 619.76 620.55 637.01 659.35 667.69 673.50  
 676.67 697.29 726.34 746.94 780.52 781.70  
 800.59 808.58 812.42 817.81 832.18 833.38  
 851.79 893.63 897.42 901.03 903.89 913.66

920.78 935.95 940.84 946.57 947.79 949.81  
950.42 955.60 956.35 962.83 963.07 973.69  
975.65 976.58 980.49 982.68 998.42 1007.73  
1037.61 1038.83 1040.34 1049.30 1054.31 1059.10  
1061.54 1081.78 1088.32 1098.06 1105.16 1118.96  
1125.69 1128.92 1130.55 1137.16 1158.64 1181.30  
1181.97 1182.65 1185.72 1189.90 1191.97 1198.66  
1201.21 1204.26 1208.67 1212.31 1218.82 1221.32  
1223.81 1230.77 1234.71 1250.89 1272.05 1283.48  
1286.64 1292.24 1301.45 1318.38 1329.97 1341.71  
1344.03 1351.40 1352.29 1355.58 1375.76 1394.50  
1410.79 1413.32 1415.47 1416.01 1417.17 1418.38  
1421.07 1427.70 1436.37 1437.68 1440.35 1448.57  
1460.13 1464.67 1465.81 1475.46 1483.68 1491.33  
1492.69 1496.18 1496.71 1500.64 1500.97 1501.65  
1503.17 1503.97 1504.56 1505.43 1505.95 1506.85  
1508.07 1509.64 1510.63 1511.62 1516.10 1517.49  
1518.24 1518.64 1520.36 1521.62 1524.43 1525.24  
1527.47 1528.55 1529.95 1538.61 1545.71 1551.63  
1608.42 1613.84 1620.10 1622.19 1629.81 1657.48  
2971.97 3004.75 3023.36 3029.38 3031.46 3033.70  
3034.01 3034.46 3037.89 3038.85 3039.85 3040.43  
3043.43 3044.40 3048.83 3061.86 3062.91 3066.79  
3083.89 3098.57 3099.31 3101.14 3102.40 3102.75  
3106.70 3108.82 3109.75 3112.06 3113.82 3115.21  
3117.05 3118.85 3133.25 3139.42 3140.95 3145.16  
3155.98 3162.22 3165.05 3168.25 3173.89 3173.95  
3181.15 3183.51 3188.59 3190.50 3192.44 3210.14  
3210.91 3220.92 3221.85 3223.74 3236.71 3237.55

L4\_100

18.89 24.29 28.41 33.43 40.00 50.10  
59.27 61.08 68.69 71.32 81.51 83.50  
86.82 99.41 99.85 107.53 110.33 114.91  
128.02 134.01 136.45 137.48 140.90 149.28  
159.62 163.16 178.09 185.46 187.88 194.08  
201.58 204.87 211.60 216.71 225.95 235.65  
240.36 244.68 248.18 253.07 254.82 263.09  
266.88 269.93 271.03 271.60 273.58 287.85  
289.97 297.68 298.67 302.90 304.53 315.59  
320.84 324.71 330.63 335.78 345.54 359.00  
378.26 380.38 386.70 399.61 403.50 410.90  
415.66 416.46 420.99 448.25 456.95 461.40  
475.74 480.02 486.49 496.04 503.78 521.10  
551.87 561.63 565.60 578.68 587.50 612.79  
621.00 621.58 636.22 658.96 667.76 672.98  
676.55 698.50 725.86 746.83 779.21 780.15  
800.93 808.26 814.33 817.56 832.60 836.78  
852.17 893.88 897.76 903.19 904.06 913.02  
920.60 938.70 941.48 946.12 946.68 949.29  
949.95 953.74 957.14 962.91 964.73 973.68  
975.61 976.60 979.67 981.79 997.26 1008.98  
1037.59 1038.33 1040.19 1049.32 1054.43 1059.45  
1062.12 1082.80 1088.17 1098.94 1103.17 1118.96  
1126.20 1129.03 1130.98 1137.52 1158.50 1180.95  
1182.55 1183.66 1185.53 1189.80 1191.81 1199.67  
1200.49 1204.13 1210.13 1215.23 1218.63 1221.38

1225.92 1232.09 1234.46 1250.10 1270.75 1283.49  
1286.44 1291.65 1302.02 1318.48 1329.76 1340.25  
1344.99 1351.88 1352.26 1355.20 1375.61 1394.09  
1410.28 1412.89 1415.00 1415.10 1417.02 1418.53  
1420.27 1425.45 1436.16 1436.51 1439.45 1448.34  
1457.88 1465.30 1465.71 1475.33 1484.23 1491.93  
1492.63 1493.76 1497.19 1500.41 1501.09 1501.24  
1502.41 1504.30 1505.05 1505.74 1506.18 1506.65  
1507.49 1509.61 1510.04 1511.79 1516.98 1517.93  
1518.20 1518.39 1519.95 1521.32 1523.84 1525.05  
1527.33 1528.18 1528.68 1536.30 1544.41 1548.97  
1609.08 1613.94 1619.53 1620.30 1630.16 1657.86  
2976.45 3006.25 3022.33 3030.08 3032.80 3034.37  
3035.69 3038.63 3039.22 3041.80 3043.15 3043.31  
3044.91 3047.30 3050.96 3067.96 3068.06 3069.23  
3089.17 3100.96 3102.96 3103.68 3103.72 3104.86  
3109.76 3112.72 3113.51 3114.20 3116.15 3117.63  
3118.57 3121.28 3134.18 3141.55 3142.03 3146.82  
3158.78 3164.70 3166.38 3167.28 3169.66 3175.19  
3181.46 3186.87 3187.53 3189.48 3193.85 3210.50  
3214.19 3217.84 3221.16 3222.48 3237.34 3237.46

L4\_110

10.91 22.63 24.88 32.36 33.86 45.73  
51.28 56.94 58.78 64.06 76.00 79.13  
87.13 90.54 97.18 109.28 115.42 117.13  
124.37 127.04 133.64 136.01 147.04 154.63  
158.53 172.90 177.18 187.90 192.36 203.03  
207.07 213.49 214.76 219.38 223.53 227.59  
230.77 234.95 240.23 250.05 253.42 256.39  
258.78 265.56 269.94 270.75 275.60 281.35  
287.92 289.00 291.18 301.04 307.37 314.51  
317.54 322.64 330.31 338.00 341.67 361.30  
376.69 380.85 389.47 395.93 401.22 410.57  
414.18 418.34 425.91 442.71 457.31 462.65  
467.44 479.96 492.38 495.68 507.41 512.91  
551.80 564.60 575.54 584.84 592.62 615.64  
621.71 623.05 635.10 655.44 669.61 672.13  
678.50 705.86 723.18 747.42 775.95 780.96  
809.68 813.56 817.59 818.31 832.35 843.13  
848.90 878.03 896.87 902.58 908.15 911.93  
916.74 940.43 945.88 946.50 949.37 949.67  
951.80 956.80 957.75 962.15 967.06 972.84  
973.44 974.68 978.32 987.56 1000.91 1007.78  
1028.51 1042.97 1044.33 1051.08 1054.26 1057.07  
1058.95 1086.70 1087.61 1097.04 1101.00 1104.18  
1123.40 1129.00 1129.97 1135.74 1158.39 1178.35  
1180.90 1184.52 1189.83 1191.01 1194.82 1202.42  
1205.31 1205.60 1207.82 1215.47 1218.35 1219.40  
1230.97 1235.78 1240.13 1250.73 1255.64 1279.55  
1284.76 1289.34 1302.57 1316.63 1338.16 1343.75  
1345.03 1348.64 1352.66 1359.31 1377.42 1397.49  
1413.38 1415.20 1415.54 1416.81 1419.57 1421.03  
1426.06 1431.91 1435.82 1437.20 1439.28 1448.94  
1450.52 1458.30 1466.78 1475.41 1487.19 1489.54  
1492.63 1493.95 1494.61 1498.16 1499.52 1500.50  
1500.78 1503.86 1504.05 1504.52 1506.07 1506.44

1507.39 1507.75 1510.30 1511.32 1513.09 1515.95  
1517.72 1518.12 1519.50 1522.11 1522.68 1524.51  
1526.52 1527.72 1530.13 1534.92 1546.41 1551.32  
1610.78 1618.40 1622.39 1622.87 1637.66 1658.12  
3008.10 3029.47 3033.64 3034.08 3036.35 3038.27  
3039.71 3040.25 3041.10 3042.23 3042.43 3045.37  
3045.91 3048.59 3050.45 3052.70 3069.55 3070.94  
3099.29 3102.43 3103.08 3108.29 3108.90 3109.16  
3109.33 3109.62 3114.39 3116.20 3117.38 3130.82  
3136.55 3137.70 3141.70 3144.95 3149.30 3152.37  
3158.77 3164.32 3170.32 3171.48 3172.40 3182.67  
3183.92 3185.68 3186.21 3186.84 3187.64 3194.92  
3201.34 3204.54 3209.98 3227.39 3233.43 3242.52

L4\_120

10.30 22.49 25.53 33.74 37.99 46.08  
52.12 58.83 62.39 68.00 79.64 84.99  
90.16 92.49 96.94 108.65 117.58 119.07  
126.74 129.11 135.53 137.07 150.21 155.55  
158.20 172.29 177.48 189.87 194.54 203.01  
210.71 212.94 217.62 220.25 222.82 228.83  
230.19 236.80 244.29 251.98 254.05 258.11  
262.28 268.86 269.65 271.42 276.05 276.92  
287.19 289.67 293.14 301.46 308.56 312.99  
317.04 321.18 329.74 340.20 343.24 360.45  
377.42 380.16 386.48 395.23 399.86 410.68  
415.88 418.42 424.67 440.30 456.83 460.87  
466.87 479.55 494.29 495.52 506.06 511.67  
552.37 564.22 573.37 585.29 592.94 617.20  
622.01 624.03 634.70 655.22 669.42 672.36  
677.83 708.58 723.93 750.90 775.67 780.64  
810.33 812.99 817.93 819.02 832.14 847.40  
850.87 881.18 896.95 902.76 910.91 912.04  
917.91 941.60 946.27 946.90 948.52 949.85  
951.75 957.46 958.40 962.14 968.90 972.52  
973.62 974.53 978.71 989.63 1001.26 1006.71  
1029.87 1041.23 1044.80 1051.14 1054.18 1057.87  
1059.89 1086.36 1087.65 1096.28 1101.57 1104.80  
1122.80 1128.80 1129.51 1136.13 1158.65 1178.69  
1181.31 1185.62 1190.35 1191.30 1194.70 1202.28  
1205.95 1206.19 1208.16 1217.03 1219.29 1220.22  
1230.82 1236.18 1240.23 1252.03 1258.74 1280.02  
1285.19 1289.39 1302.64 1312.80 1337.36 1343.05  
1343.96 1347.47 1352.83 1359.29 1377.16 1397.55  
1414.04 1415.45 1415.64 1417.14 1419.95 1420.73  
1425.94 1433.06 1436.26 1437.76 1439.76 1450.27  
1451.85 1458.15 1465.89 1475.52 1488.20 1489.81  
1492.70 1493.61 1494.59 1498.32 1499.34 1500.36  
1500.98 1503.65 1504.63 1505.21 1505.86 1506.67  
1507.59 1508.03 1510.49 1511.33 1512.32 1515.93  
1517.98 1518.45 1519.36 1521.84 1522.52 1524.60  
1526.61 1527.94 1530.71 1533.69 1545.77 1550.44  
1610.20 1615.81 1619.01 1624.17 1636.94 1658.22  
3007.49 3028.86 3031.68 3033.61 3033.99 3037.87  
3040.23 3040.63 3040.89 3041.00 3042.11 3043.28  
3043.78 3049.45 3049.89 3051.35 3064.40 3070.45  
3095.69 3100.55 3102.72 3104.72 3107.03 3108.05

3108.81 3110.38 3113.44 3116.67 3117.06 3125.90  
3133.69 3136.59 3136.68 3144.97 3148.89 3153.05  
3156.00 3161.51 3162.86 3170.20 3171.06 3178.09  
3178.58 3183.45 3183.53 3185.67 3187.09 3187.87  
3191.10 3198.31 3216.53 3227.26 3231.63 3242.76

L4\_130

5.30 21.49 24.97 34.21 38.96 46.26  
51.07 55.48 62.17 67.42 78.85 81.75  
88.85 94.21 97.78 105.73 113.31 117.79  
120.84 127.45 133.62 138.77 145.75 154.19  
158.70 166.83 173.29 187.94 188.85 197.96  
203.45 212.15 220.68 221.22 222.53 228.32  
231.11 233.85 238.90 251.57 256.55 257.36  
265.46 266.85 268.15 271.01 276.39 279.95  
284.70 292.77 295.47 302.92 310.89 312.71  
319.82 322.50 332.36 342.18 346.73 360.62  
369.89 378.14 385.60 396.04 399.63 411.56  
413.71 418.61 424.50 431.79 455.39 460.94  
467.05 479.76 493.58 496.44 504.96 513.24  
553.32 563.87 574.37 587.18 591.92 618.80  
622.41 624.43 634.05 655.69 670.06 672.91  
678.19 707.55 728.13 748.63 776.87 781.40  
811.05 815.56 819.23 819.70 832.68 844.73  
850.94 881.71 897.25 903.44 908.23 912.07  
920.20 945.79 946.16 946.84 947.91 949.63  
951.50 956.08 958.78 962.80 966.85 972.56  
973.39 973.71 980.45 987.93 992.45 1008.26  
1028.89 1043.75 1044.69 1050.78 1053.20 1059.28  
1061.64 1087.31 1088.59 1097.55 1101.19 1104.84  
1122.64 1128.75 1130.09 1136.29 1159.32 1177.32  
1181.26 1186.90 1191.19 1191.30 1196.41 1204.50  
1205.42 1205.93 1208.82 1218.60 1220.81 1223.48  
1232.48 1238.58 1239.20 1252.80 1261.08 1280.34  
1286.62 1290.03 1300.77 1316.40 1336.33 1344.40  
1345.44 1346.05 1352.35 1358.57 1375.78 1395.98  
1414.28 1415.04 1415.65 1416.94 1419.43 1420.77  
1424.09 1432.82 1436.09 1437.07 1439.43 1449.73  
1450.78 1457.44 1467.12 1476.58 1488.97 1489.66  
1491.98 1494.02 1494.58 1498.07 1498.69 1500.07  
1500.76 1502.40 1504.00 1505.80 1506.51 1507.60  
1507.91 1508.93 1509.62 1511.19 1511.71 1515.21  
1517.67 1518.18 1519.55 1522.23 1522.49 1524.49  
1526.40 1528.31 1529.50 1530.37 1546.68 1549.01  
1611.19 1620.10 1622.54 1626.09 1637.54 1659.47  
3007.77 3029.51 3033.83 3034.29 3038.60 3039.58  
3041.32 3041.51 3042.77 3043.24 3045.65 3046.14  
3046.35 3050.23 3053.22 3055.10 3060.31 3070.31  
3101.06 3103.48 3103.57 3108.48 3109.09 3109.68  
3110.92 3113.88 3114.32 3117.49 3121.10 3125.43  
3132.69 3139.03 3139.22 3141.17 3149.81 3163.21  
3164.82 3167.67 3168.97 3170.19 3172.90 3184.21  
3186.08 3186.46 3188.62 3189.33 3191.36 3193.30  
3193.59 3198.52 3228.90 3233.73 3236.05 3245.53

L4\_140

17.56 19.58 24.65 34.44 39.75 46.85  
 55.82 58.31 67.35 72.64 79.94 84.81  
 87.49 89.85 101.32 107.98 113.56 114.19  
 125.06 129.25 131.70 142.23 144.81 149.93  
 158.75 163.16 174.68 189.52 190.08 200.07  
 206.22 220.10 221.87 224.44 225.53 229.65  
 233.33 237.37 243.19 249.24 254.18 261.90  
 264.66 267.73 270.09 272.67 276.66 284.12  
 290.70 292.59 300.52 303.88 310.25 313.25  
 316.99 326.03 334.22 343.58 350.57 356.06  
 360.67 378.63 387.17 397.91 398.75 409.67  
 414.81 417.15 420.63 425.85 453.59 460.98  
 468.19 480.37 490.88 496.09 506.78 513.92  
 554.58 564.58 575.25 589.54 592.69 620.89  
 622.94 625.82 634.35 657.31 670.53 673.22  
 677.75 708.00 731.73 748.21 777.77 782.61  
 812.89 818.36 819.31 821.68 833.37 846.26  
 852.91 885.77 896.53 903.91 908.73 913.36  
 922.51 944.51 946.45 947.51 949.00 950.63  
 951.99 957.15 959.31 963.57 967.94 971.96  
 972.15 973.69 981.79 986.39 988.56 1008.67  
 1029.00 1043.89 1045.31 1050.75 1053.64 1060.21  
 1062.51 1086.60 1088.61 1098.19 1100.12 1103.99  
 1121.45 1128.49 1129.02 1136.35 1159.81 1176.26  
 1181.56 1187.86 1191.31 1192.60 1199.09 1203.24  
 1205.07 1207.47 1209.98 1218.92 1221.48 1224.77  
 1230.87 1233.13 1240.14 1252.58 1264.44 1280.61  
 1287.30 1289.66 1298.71 1315.87 1334.87 1343.91  
 1344.98 1346.27 1352.87 1356.94 1373.48 1394.10  
 1414.38 1414.75 1415.90 1417.02 1418.28 1420.85  
 1424.42 1432.02 1435.86 1436.61 1438.57 1448.21  
 1450.17 1456.61 1466.97 1476.88 1489.13 1490.73  
 1492.13 1493.96 1494.73 1498.08 1499.74 1500.45  
 1500.86 1501.81 1503.87 1504.32 1506.59 1507.21  
 1508.15 1508.97 1509.58 1510.63 1512.09 1515.36  
 1517.71 1518.10 1519.24 1520.98 1522.71 1523.39  
 1525.44 1528.12 1530.05 1532.73 1542.01 1546.03  
 1611.60 1620.22 1622.55 1629.54 1639.07 1660.11  
 3007.67 3029.54 3034.59 3036.06 3038.61 3039.26  
 3042.05 3042.16 3042.94 3043.32 3044.46 3045.88  
 3047.74 3049.23 3052.38 3055.37 3060.15 3070.15  
 3101.04 3103.70 3104.35 3109.02 3109.79 3110.01  
 3111.75 3113.45 3114.73 3117.44 3118.07 3128.53  
 3131.69 3135.39 3143.05 3147.55 3149.97 3163.64  
 3164.76 3171.00 3171.77 3172.41 3180.37 3181.87  
 3184.19 3187.26 3188.21 3189.25 3192.11 3195.38  
 3195.77 3200.26 3221.22 3228.32 3247.20 3256.47

L4\_150

15.11 23.26 25.40 35.04 39.12 47.96  
 56.78 60.99 66.12 71.36 77.28 81.60  
 89.55 93.64 96.70 102.74 106.70 122.34  
 122.64 129.37 133.54 137.93 142.46 146.25  
 156.72 164.15 174.86 183.18 187.48 196.21  
 196.69 211.13 220.16 222.94 225.00 227.59  
 232.31 236.65 249.22 252.73 256.26 259.13  
 264.04 266.15 268.88 271.31 273.60 281.37

291.55 296.37 298.55 306.00 309.92 312.42  
 317.01 333.97 337.81 343.71 355.82 366.64  
 376.58 378.04 390.20 397.37 398.46 407.58  
 412.04 419.89 427.74 434.08 453.56 462.03  
 471.95 483.53 493.35 496.58 509.03 515.35  
 556.48 568.90 580.45 593.01 597.34 619.17  
 622.99 628.82 634.65 656.65 666.90 672.81  
 681.06 708.21 736.30 750.13 774.72 783.04  
 810.03 819.98 821.03 822.66 832.56 846.60  
 853.41 886.00 896.53 902.79 907.26 914.45  
 924.61 944.23 946.24 946.99 948.92 950.64  
 958.59 959.08 960.55 961.89 969.44 970.52  
 973.47 973.87 987.49 989.35 990.65 1009.32  
 1028.18 1044.97 1046.38 1051.39 1054.82 1060.37  
 1062.43 1085.70 1090.93 1098.82 1099.54 1104.53  
 1120.00 1126.81 1128.80 1137.20 1158.82 1177.69  
 1180.36 1187.89 1192.15 1193.50 1199.94 1202.84  
 1203.48 1207.55 1208.83 1219.29 1224.98 1226.14  
 1237.64 1241.11 1244.02 1249.33 1267.22 1278.96  
 1281.89 1287.09 1298.16 1316.45 1326.87 1343.33  
 1345.60 1347.38 1352.91 1357.96 1370.38 1394.79  
 1412.51 1414.38 1415.87 1416.91 1417.92 1421.38  
 1421.99 1425.24 1436.09 1436.88 1439.42 1447.35  
 1449.40 1455.79 1468.68 1475.51 1489.39 1491.21  
 1492.37 1493.59 1495.56 1498.04 1498.38 1500.61  
 1501.81 1502.31 1503.77 1505.33 1506.32 1506.87  
 1507.53 1508.10 1508.70 1510.43 1515.21 1516.67  
 1518.02 1518.37 1518.81 1522.18 1523.21 1524.77  
 1526.16 1528.55 1530.26 1532.98 1542.28 1546.15  
 1608.86 1621.58 1624.11 1629.18 1634.89 1659.97  
 3009.74 3029.70 3034.54 3037.14 3038.60 3039.12  
 3039.50 3040.58 3041.31 3042.47 3045.58 3046.53  
 3046.92 3047.80 3054.69 3072.45 3073.35 3092.87  
 3101.31 3103.80 3104.11 3105.63 3108.15 3110.32  
 3112.50 3112.91 3114.54 3116.11 3117.48 3121.09  
 3122.48 3128.13 3138.28 3145.72 3147.78 3148.71  
 3151.43 3162.60 3170.19 3170.26 3173.33 3178.60  
 3181.76 3185.25 3185.33 3187.53 3189.02 3192.13  
 3198.48 3218.93 3228.90 3240.27 3249.00 3250.18

L4\_160

16.51 23.14 28.12 34.78 39.46 49.49  
 56.44 61.81 69.21 70.79 73.46 81.19  
 90.62 93.92 98.22 107.81 109.80 122.43  
 124.70 129.28 134.62 139.60 140.82 146.94  
 156.33 161.32 173.90 180.00 185.56 193.48  
 199.23 212.18 218.63 225.18 226.26 228.10  
 232.27 236.93 250.99 252.91 256.77 260.27  
 265.44 267.65 268.01 271.61 272.84 282.33  
 289.46 297.21 303.42 305.10 308.82 313.34  
 316.78 334.71 338.25 342.10 359.15 370.29  
 372.60 377.29 391.63 393.53 398.57 406.40  
 412.07 419.77 426.59 433.06 453.25 461.91  
 471.96 483.32 491.96 496.50 508.84 515.63  
 556.59 569.07 579.45 594.06 597.85 618.53  
 623.06 630.38 634.95 655.87 666.46 672.78  
 681.10 708.66 737.18 750.18 775.07 783.10

809.68 820.30 821.22 822.57 832.52 847.07  
853.57 886.65 896.00 901.60 907.26 914.19  
926.91 943.25 945.98 946.42 949.23 950.53  
957.71 959.20 960.22 962.12 969.69 970.65  
973.56 973.95 987.99 989.23 990.60 1009.41  
1025.92 1044.74 1045.89 1051.74 1055.21 1058.19  
1061.76 1084.82 1090.88 1097.33 1098.90 1103.89  
1119.65 1126.48 1128.57 1137.16 1158.80 1178.51  
1179.99 1187.91 1192.04 1194.13 1200.77 1202.40  
1202.98 1207.33 1208.79 1219.70 1225.20 1226.77  
1236.93 1241.99 1244.14 1250.36 1267.07 1277.43  
1280.68 1286.76 1298.13 1316.17 1321.71 1342.95  
1345.44 1347.92 1352.51 1358.11 1369.62 1394.45  
1411.62 1414.06 1415.66 1416.90 1417.67 1419.00  
1421.30 1421.83 1435.99 1436.32 1439.69 1447.84  
1450.66 1455.57 1468.63 1475.24 1489.33 1491.42  
1492.81 1493.70 1494.75 1497.56 1499.87 1500.59  
1501.58 1502.58 1503.99 1505.09 1506.14 1506.66  
1507.45 1508.09 1508.55 1510.38 1515.20 1516.18  
1518.08 1518.80 1521.01 1522.23 1523.11 1524.74  
1525.96 1528.61 1530.08 1533.14 1541.87 1545.42  
1608.58 1621.17 1624.11 1628.02 1635.05 1659.72  
3010.71 3029.69 3034.62 3036.06 3036.37 3038.74  
3038.80 3041.33 3041.50 3042.82 3044.81 3044.96  
3047.77 3048.96 3053.25 3074.55 3079.31 3095.01  
3102.63 3103.89 3104.34 3104.80 3108.31 3109.91  
3111.87 3114.30 3114.50 3117.38 3117.95 3118.62  
3120.38 3125.45 3138.30 3145.44 3145.81 3147.82  
3149.11 3163.12 3169.90 3170.49 3174.54 3179.48  
3179.67 3183.13 3186.69 3186.74 3191.16 3192.36  
3198.47 3229.41 3232.38 3237.30 3243.02 3256.27

=====  
L4\_170  
=====

8.97 19.87 24.03 34.17 41.78 51.84  
53.62 62.46 71.23 74.83 80.24 90.82  
99.41 100.98 108.27 111.39 114.46 121.36  
122.93 134.53 135.46 142.38 144.81 152.82  
157.46 163.18 165.48 182.73 192.76 199.17  
215.96 226.14 227.64 229.74 235.25 237.35  
243.19 250.19 251.92 256.65 262.01 267.30  
269.08 269.16 273.97 279.61 286.67 291.24  
297.03 300.50 303.13 310.97 314.11 315.87  
318.27 328.93 337.27 349.00 351.89 360.75  
364.62 377.32 389.20 395.89 405.28 406.36  
415.27 419.59 426.67 431.90 450.84 459.75  
471.99 482.00 491.61 497.84 513.71 515.15  
558.18 567.20 579.86 592.05 598.97 622.92  
623.96 626.32 634.22 657.16 670.44 672.55  
676.79 710.34 738.56 749.83 779.76 783.46  
810.40 814.14 823.61 824.31 834.74 847.71  
853.35 887.39 897.12 904.18 910.40 913.48  
930.12 941.54 946.21 947.05 949.98 952.49  
953.57 959.58 962.20 964.27 971.04 972.37  
973.01 973.76 977.03 989.06 991.33 1010.05  
1024.13 1043.41 1045.48 1050.16 1053.04 1060.13  
1063.71 1084.54 1088.14 1096.48 1101.91 1103.37  
1121.34 1128.93 1129.63 1136.03 1159.70 1176.16

1181.81 1187.62 1192.68 1195.11 1200.28 1201.18  
1202.17 1212.09 1213.26 1219.34 1222.78 1223.77  
1229.03 1233.22 1244.02 1246.95 1266.33 1276.46  
1283.94 1289.00 1295.90 1315.21 1320.78 1342.13  
1346.32 1348.10 1352.57 1357.81 1364.88 1392.92  
1414.87 1415.05 1416.75 1417.12 1418.70 1419.91  
1421.74 1424.02 1435.99 1437.43 1438.04 1448.29  
1449.45 1455.71 1468.11 1476.48 1488.57 1489.19  
1492.13 1492.96 1495.48 1497.17 1498.83 1501.14  
1501.54 1503.00 1504.49 1506.08 1506.73 1506.92  
1508.63 1509.94 1511.46 1512.92 1515.26 1517.96  
1518.24 1518.49 1519.90 1521.03 1522.70 1523.38  
1525.24 1527.07 1533.04 1534.08 1543.64 1544.12  
1610.66 1623.04 1623.84 1628.17 1637.22 1660.53  
3007.78 3028.82 3034.80 3035.44 3039.09 3039.89  
3041.34 3041.57 3041.91 3042.13 3046.24 3046.81  
3047.65 3048.87 3053.28 3070.28 3073.26 3092.55  
3102.89 3103.13 3104.27 3110.30 3110.99 3112.13  
3113.09 3114.89 3115.59 3117.58 3117.67 3119.65  
3123.40 3135.55 3136.81 3143.76 3145.54 3150.57  
3156.45 3158.93 3163.63 3171.64 3174.14 3181.21  
3183.61 3185.19 3189.50 3191.50 3197.54 3197.71  
3202.98 3208.00 3217.70 3230.58 3255.87 3266.71

=====  
L4\_180  
=====

16.64 22.35 24.44 32.53 43.11 52.96  
55.71 64.19 71.77 73.67 79.59 92.66  
99.94 106.31 108.46 115.26 118.15 123.89  
129.49 135.86 139.80 141.62 148.05 151.81  
156.36 159.27 166.08 182.58 189.29 198.22  
215.74 225.13 227.79 231.83 236.00 241.68  
243.46 249.82 252.95 257.48 261.60 267.52  
270.18 271.49 275.73 278.16 284.02 289.02  
294.18 301.87 307.33 314.30 316.23 318.93  
319.70 327.55 338.75 351.19 356.35 362.47  
365.91 377.33 391.51 396.96 405.52 408.99  
417.39 421.01 427.20 435.24 452.83 459.77  
471.95 482.49 492.14 497.80 513.28 517.07  
559.46 565.67 579.91 592.94 599.77 623.62  
624.05 626.70 634.65 657.33 669.87 672.36  
675.93 710.06 738.23 749.39 779.44 783.14  
808.34 814.63 822.40 823.04 834.26 848.02  
853.55 886.69 896.90 903.52 910.64 913.51  
931.20 941.48 944.75 946.52 949.66 952.26  
953.98 959.46 962.63 963.90 971.66 972.11  
973.25 973.74 976.21 988.99 991.48 1009.89  
1020.98 1042.34 1044.58 1049.67 1052.45 1058.98  
1064.67 1083.73 1087.24 1093.87 1101.05 1103.60  
1120.58 1128.64 1129.01 1136.09 1158.66 1176.91  
1181.75 1185.80 1191.40 1194.22 1198.55 1201.26  
1203.24 1211.86 1212.97 1219.29 1222.08 1223.25  
1227.46 1233.75 1243.04 1244.31 1263.60 1273.52  
1281.60 1288.84 1295.03 1313.81 1314.96 1341.41  
1345.41 1347.04 1352.75 1357.46 1363.77 1393.45  
1411.89 1414.95 1415.65 1417.06 1417.09 1420.22  
1421.70 1424.64 1436.16 1437.49 1438.87 1447.44  
1449.08 1456.37 1466.82 1475.58 1488.15 1490.63

1492.01 1493.56 1494.69 1498.70 1499.58 1500.86  
1502.46 1503.16 1504.32 1506.23 1506.52 1507.33  
1508.39 1509.56 1510.86 1513.13 1514.87 1516.11  
1517.64 1518.08 1520.42 1520.84 1524.24 1524.84  
1525.08 1527.57 1531.93 1535.26 1543.98 1547.63  
1610.18 1621.50 1622.41 1624.21 1635.95 1660.81  
3007.76 3028.81 3034.85 3034.87 3038.46 3038.61  
3041.16 3041.22 3042.26 3043.03 3045.65 3046.53  
3047.67 3048.70 3052.73 3070.45 3081.73 3098.79  
3102.42 3102.57 3103.84 3109.83 3110.02 3112.11  
3113.30 3115.45 3115.83 3117.41 3118.25 3122.09  
3125.80 3128.52 3135.23 3145.05 3150.16 3151.21  
3155.22 3161.30 3163.97 3167.99 3171.31 3173.56  
3175.66 3181.84 3188.42 3189.44 3195.39 3197.33  
3197.54 3217.01 3219.77 3229.78 3257.10 3272.64

1

15.93 23.70 27.43 34.36 38.23 40.12  
42.47 52.22 57.25 59.51 61.97 68.18  
73.73 76.56 81.43 87.27 89.27 98.13  
103.07 107.05 118.36 128.50 137.71 144.47  
150.56 159.33 167.76 174.18 193.01 204.63  
210.37 221.20 228.88 240.29 248.64 255.36  
257.41 259.53 264.09 267.84 277.63 279.91  
288.36 291.87 294.22 297.80 318.38 327.31  
336.80 340.19 365.47 379.80 381.48 391.03  
394.47 407.39 414.78 438.77 448.11 451.21  
453.85 458.57 471.49 484.19 492.21 498.65  
508.64 528.39 532.90 537.57 562.83 586.89  
610.86 612.24 640.29 646.74 665.44 673.33  
678.66 680.88 731.56 732.64 749.83 753.84  
768.79 781.95 789.29 808.41 812.47 817.63  
819.81 828.03 833.18 855.90 868.60 870.85  
890.36 895.07 896.21 897.44 901.74 903.79  
906.20 912.17 914.49 940.29 943.17 945.54  
945.95 946.97 950.58 954.88 962.14 972.63  
973.38 975.07 975.32 976.64 994.85 998.67  
1018.79 1021.82 1022.41 1030.32 1046.26 1049.99  
1053.70 1055.02 1064.86 1066.33 1085.25 1092.91  
1093.24 1098.73 1101.15 1103.93 1107.24 1111.44  
1128.78 1129.59 1132.63 1133.21 1136.54 1147.10  
1154.45 1163.35 1189.17 1190.77 1200.17 1202.31  
1203.45 1206.12 1211.97 1217.01 1225.30 1236.55  
1261.55 1285.29 1291.17 1293.97 1296.43 1301.25  
1302.36 1304.37 1307.17 1309.42 1316.39 1318.23  
1324.86 1335.59 1340.83 1349.22 1350.14 1352.96  
1355.92 1361.57 1366.56 1369.28 1377.50 1377.99  
1382.74 1389.06 1391.68 1393.56 1394.62 1398.17  
1400.56 1401.69 1411.84 1414.16 1415.67 1431.52  
1433.74 1435.15 1455.08 1466.47 1474.41 1491.19  
1494.34 1496.07 1496.44 1497.22 1499.01 1500.39  
1501.57 1502.73 1503.42 1504.02 1505.01 1506.11  
1507.59 1509.01 1510.56 1513.84 1516.93 1517.44  
1518.65 1520.94 1522.00 1525.28 1527.29 1531.05  
1585.73 1605.03 1610.74 1613.20 1644.08 1658.63  
2997.13 3009.92 3011.48 3011.66 3013.51 3014.12  
3017.19 3018.99 3021.91 3030.23 3031.82 3032.03

3033.48 3033.86 3035.59 3038.19 3039.02 3045.13  
3050.89 3064.01 3065.62 3065.90 3067.23 3071.12  
3073.55 3084.68 3086.65 3090.16 3092.02 3097.89  
3098.50 3102.33 3103.97 3105.88 3107.80 3108.71  
3111.67 3111.79 3115.23 3116.09 3121.00 3133.62  
3140.16 3170.20 3171.92 3177.32 3178.31 3180.06  
3188.03 3191.42 3201.84 3202.65 3218.19 3252.10

1-TS

-199.69 14.28 17.35 30.86 33.53 37.53  
43.62 45.64 51.40 54.85 59.93 63.96  
76.15 76.92 83.74 85.82 86.27 93.56  
97.80 108.83 121.36 126.54 133.93 140.14  
147.80 154.79 162.77 175.64 184.43 194.99  
209.92 215.07 228.92 236.08 240.64 249.83  
251.95 254.14 257.67 264.03 269.39 275.91  
279.51 282.02 287.60 293.21 302.42 312.29  
331.11 333.70 340.91 360.05 379.27 383.33  
393.19 419.38 423.51 430.30 434.51 449.25  
449.38 451.07 456.68 480.38 488.95 500.62  
516.36 524.86 533.96 540.87 563.40 587.83  
609.76 614.79 624.89 640.80 645.99 662.46  
673.78 691.05 729.88 736.62 747.79 748.87  
770.47 779.12 786.30 809.02 817.11 824.81  
828.11 829.48 834.30 856.18 868.79 871.63  
878.33 895.47 900.89 900.98 903.82 907.59  
908.95 910.31 911.88 941.54 944.41 945.49  
945.73 946.62 956.37 962.95 965.38 973.07  
974.44 975.14 977.40 979.79 984.25 999.96  
1001.80 1018.92 1024.79 1027.49 1043.70 1049.20  
1049.90 1060.88 1064.55 1072.83 1086.81 1095.01  
1098.93 1099.47 1100.59 1103.30 1105.14 1113.35  
1127.31 1128.69 1133.08 1135.36 1138.83 1149.03  
1155.13 1162.98 1189.34 1189.51 1202.33 1203.35  
1204.07 1205.71 1215.24 1217.19 1229.02 1244.42  
1259.44 1286.71 1293.82 1297.19 1298.97 1300.15  
1301.53 1305.14 1307.66 1310.02 1317.25 1319.09  
1320.82 1333.92 1342.34 1347.75 1348.10 1349.81  
1350.15 1359.46 1367.73 1369.61 1379.20 1379.94  
1385.49 1388.99 1392.45 1393.95 1394.40 1397.83  
1399.94 1402.49 1412.17 1413.57 1416.66 1431.56  
1432.58 1436.83 1466.29 1470.32 1475.94 1487.53  
1492.98 1494.34 1496.06 1498.35 1499.46 1500.15  
1501.07 1501.63 1503.58 1504.23 1505.15 1505.99  
1506.97 1507.90 1511.24 1514.09 1515.93 1517.03  
1517.51 1520.95 1523.68 1524.49 1524.61 1526.74  
1604.27 1609.22 1611.05 1611.54 1640.21 1658.29  
3010.04 3012.73 3013.21 3014.81 3017.45 3018.94  
3024.36 3027.23 3028.18 3031.73 3033.17 3033.62  
3034.22 3037.56 3037.79 3039.94 3040.62 3043.75  
3057.39 3064.53 3066.00 3067.77 3068.04 3072.57  
3073.49 3080.44 3085.23 3091.31 3095.25 3099.95  
3100.87 3101.25 3101.45 3107.32 3110.72 3113.57  
3114.02 3119.14 3120.60 3123.01 3123.37 3127.52  
3134.72 3164.10 3170.54 3177.18 3178.23 3185.96  
3186.94 3193.77 3200.98 3206.37 3207.60 3211.25

1A

|         |         |         |         |         |         |
|---------|---------|---------|---------|---------|---------|
| 23.19   | 29.22   | 36.14   | 40.01   | 43.50   | 47.81   |
| 53.57   | 58.80   | 61.64   | 66.39   | 76.39   | 79.11   |
| 85.12   | 90.08   | 93.08   | 96.68   | 98.98   | 102.43  |
| 109.10  | 112.02  | 131.08  | 136.79  | 140.71  | 153.10  |
| 162.05  | 171.55  | 182.09  | 187.50  | 195.66  | 206.05  |
| 211.96  | 221.12  | 231.01  | 237.81  | 250.45  | 250.99  |
| 253.29  | 257.51  | 263.62  | 265.40  | 271.33  | 275.46  |
| 277.89  | 280.91  | 288.21  | 303.40  | 309.28  | 317.06  |
| 333.02  | 333.98  | 342.28  | 364.37  | 379.22  | 387.25  |
| 398.18  | 414.50  | 423.22  | 438.01  | 450.11  | 451.30  |
| 453.19  | 458.63  | 481.62  | 485.23  | 489.14  | 500.20  |
| 520.47  | 526.68  | 539.11  | 544.86  | 563.59  | 587.51  |
| 611.37  | 623.53  | 638.01  | 652.34  | 664.53  | 672.67  |
| 679.51  | 709.27  | 733.64  | 745.27  | 747.57  | 755.45  |
| 769.15  | 779.06  | 786.47  | 808.40  | 820.15  | 827.05  |
| 829.53  | 833.67  | 849.96  | 856.93  | 867.98  | 872.83  |
| 895.71  | 899.99  | 903.35  | 904.46  | 907.93  | 909.92  |
| 911.40  | 912.09  | 919.35  | 940.24  | 946.36  | 946.87  |
| 949.02  | 949.45  | 957.30  | 965.22  | 972.06  | 974.58  |
| 975.41  | 975.82  | 977.68  | 989.21  | 1003.35 | 1009.07 |
| 1018.86 | 1026.44 | 1028.84 | 1041.45 | 1044.26 | 1048.02 |
| 1064.88 | 1067.12 | 1073.98 | 1084.76 | 1089.11 | 1094.28 |
| 1097.87 | 1099.33 | 1103.21 | 1104.99 | 1107.40 | 1113.29 |
| 1125.93 | 1128.77 | 1132.50 | 1137.86 | 1143.15 | 1152.81 |
| 1158.09 | 1164.12 | 1190.74 | 1191.67 | 1203.26 | 1204.07 |
| 1206.64 | 1210.58 | 1216.59 | 1217.83 | 1239.50 | 1250.20 |
| 1259.24 | 1287.22 | 1293.28 | 1298.14 | 1300.05 | 1301.40 |
| 1306.50 | 1307.22 | 1309.55 | 1313.51 | 1318.07 | 1320.00 |
| 1328.89 | 1336.81 | 1342.09 | 1346.69 | 1346.93 | 1349.85 |
| 1350.86 | 1360.10 | 1368.29 | 1370.00 | 1377.86 | 1382.18 |
| 1385.23 | 1390.32 | 1393.68 | 1395.05 | 1395.51 | 1398.57 |
| 1401.74 | 1402.84 | 1414.90 | 1415.64 | 1416.61 | 1435.06 |
| 1436.02 | 1438.07 | 1467.12 | 1467.78 | 1477.35 | 1490.47 |
| 1492.04 | 1496.70 | 1498.64 | 1500.07 | 1500.96 | 1501.91 |
| 1502.35 | 1503.54 | 1504.11 | 1505.10 | 1505.59 | 1506.90 |
| 1507.33 | 1511.73 | 1512.51 | 1514.61 | 1515.85 | 1516.85 |
| 1516.98 | 1520.64 | 1523.66 | 1525.01 | 1526.12 | 1529.18 |
| 1599.52 | 1612.78 | 1619.08 | 1622.72 | 1641.96 | 1657.21 |
| 3009.84 | 3014.14 | 3015.83 | 3018.56 | 3022.43 | 3025.17 |
| 3026.82 | 3033.10 | 3033.27 | 3034.49 | 3035.11 | 3035.85 |
| 3037.37 | 3038.90 | 3039.67 | 3040.00 | 3048.40 | 3058.17 |
| 3067.37 | 3070.81 | 3071.02 | 3073.44 | 3075.17 | 3077.27 |
| 3077.67 | 3086.15 | 3088.70 | 3089.36 | 3098.90 | 3103.24 |
| 3104.06 | 3106.06 | 3107.10 | 3109.19 | 3111.23 | 3112.11 |
| 3112.50 | 3119.37 | 3121.28 | 3126.72 | 3128.78 | 3140.44 |
| 3149.73 | 3164.91 | 3171.87 | 3180.78 | 3187.69 | 3189.05 |
| 3191.23 | 3192.71 | 3197.11 | 3201.63 | 3203.56 | 3214.23 |

1B

|        |        |        |        |        |        |
|--------|--------|--------|--------|--------|--------|
| 14.64  | 26.84  | 34.98  | 37.72  | 40.94  | 45.23  |
| 50.88  | 56.16  | 66.61  | 69.64  | 73.31  | 78.75  |
| 83.73  | 86.86  | 93.29  | 96.25  | 99.55  | 104.15 |
| 107.45 | 110.97 | 127.27 | 137.72 | 149.73 | 153.82 |
| 171.35 | 180.77 | 190.09 | 192.29 | 196.68 | 209.20 |
| 219.69 | 221.29 | 229.76 | 240.48 | 243.05 | 246.94 |

|         |         |         |         |         |         |
|---------|---------|---------|---------|---------|---------|
| 250.69  | 254.20  | 263.57  | 265.84  | 269.99  | 273.43  |
| 278.67  | 285.88  | 290.03  | 301.54  | 308.13  | 312.79  |
| 333.88  | 337.54  | 341.13  | 364.30  | 379.49  | 382.89  |
| 389.63  | 411.36  | 426.43  | 438.44  | 446.92  | 450.01  |
| 452.43  | 473.65  | 485.93  | 488.58  | 497.17  | 500.18  |
| 509.50  | 533.06  | 535.92  | 547.44  | 559.75  | 588.83  |
| 608.52  | 625.11  | 642.13  | 653.86  | 667.16  | 669.69  |
| 672.45  | 707.21  | 726.39  | 749.15  | 750.76  | 755.14  |
| 772.89  | 788.40  | 798.32  | 807.25  | 814.41  | 823.10  |
| 828.78  | 833.31  | 850.72  | 857.14  | 865.74  | 868.50  |
| 896.96  | 899.34  | 903.90  | 904.88  | 906.36  | 907.88  |
| 915.84  | 916.76  | 919.86  | 933.88  | 945.44  | 946.93  |
| 947.37  | 948.54  | 955.70  | 965.78  | 973.82  | 975.07  |
| 975.63  | 978.71  | 988.36  | 995.17  | 1006.34 | 1009.07 |
| 1019.78 | 1024.16 | 1030.46 | 1039.27 | 1044.55 | 1050.36 |
| 1051.96 | 1057.85 | 1064.34 | 1079.91 | 1086.80 | 1092.22 |
| 1097.26 | 1102.00 | 1104.18 | 1105.84 | 1109.63 | 1119.46 |
| 1126.86 | 1129.65 | 1131.60 | 1135.82 | 1141.05 | 1148.20 |
| 1148.83 | 1163.39 | 1190.10 | 1194.54 | 1204.67 | 1205.71 |
| 1206.12 | 1212.20 | 1219.16 | 1220.77 | 1231.75 | 1246.55 |
| 1265.35 | 1284.62 | 1289.25 | 1292.91 | 1299.00 | 1300.42 |
| 1302.70 | 1304.97 | 1306.79 | 1309.83 | 1309.98 | 1323.70 |
| 1325.64 | 1331.83 | 1342.83 | 1352.86 | 1353.81 | 1356.34 |
| 1359.83 | 1361.77 | 1362.75 | 1369.39 | 1376.87 | 1383.31 |
| 1387.80 | 1391.41 | 1394.03 | 1395.62 | 1400.48 | 1402.17 |
| 1402.97 | 1408.41 | 1413.63 | 1416.22 | 1417.09 | 1435.40 |
| 1436.68 | 1437.68 | 1458.98 | 1462.33 | 1476.12 | 1495.57 |
| 1496.70 | 1497.91 | 1498.49 | 1499.01 | 1500.61 | 1501.53 |
| 1502.10 | 1504.07 | 1504.76 | 1506.65 | 1507.73 | 1508.27 |
| 1509.60 | 1511.54 | 1513.20 | 1517.84 | 1518.36 | 1521.50 |
| 1522.20 | 1523.81 | 1524.67 | 1525.37 | 1528.68 | 1530.41 |
| 1611.08 | 1613.56 | 1616.01 | 1619.63 | 1641.64 | 1659.31 |
| 3004.23 | 3008.13 | 3017.74 | 3023.65 | 3025.48 | 3029.90 |
| 3032.37 | 3035.97 | 3036.57 | 3036.81 | 3038.88 | 3039.92 |
| 3041.63 | 3045.16 | 3048.07 | 3052.68 | 3058.90 | 3065.23 |
| 3069.56 | 3070.64 | 3071.16 | 3074.47 | 3078.08 | 3081.18 |
| 3083.84 | 3085.28 | 3101.16 | 3104.01 | 3105.21 | 3107.04 |
| 3108.89 | 3110.17 | 3112.80 | 3116.69 | 3117.17 | 3117.55 |
| 3118.07 | 3122.19 | 3123.45 | 3129.30 | 3134.47 | 3162.83 |
| 3166.55 | 3173.89 | 3175.49 | 3178.93 | 3182.65 | 3185.76 |
| 3186.25 | 3186.75 | 3196.23 | 3198.47 | 3209.41 | 3216.67 |

1C

|        |        |        |        |        |        |
|--------|--------|--------|--------|--------|--------|
| 14.73  | 18.82  | 23.36  | 32.66  | 39.99  | 43.65  |
| 54.70  | 57.32  | 63.23  | 68.01  | 72.20  | 78.20  |
| 80.47  | 84.73  | 91.57  | 92.98  | 100.86 | 102.91 |
| 105.89 | 110.16 | 117.94 | 121.35 | 129.41 | 140.92 |
| 152.98 | 163.54 | 166.60 | 173.97 | 182.52 | 190.05 |
| 200.86 | 203.93 | 217.27 | 221.37 | 224.82 | 232.98 |
| 233.85 | 240.64 | 247.30 | 251.99 | 255.83 | 266.53 |
| 269.35 | 272.21 | 280.99 | 283.81 | 284.96 | 295.66 |
| 304.61 | 309.44 | 315.16 | 336.66 | 342.33 | 353.01 |
| 359.09 | 378.57 | 384.35 | 392.90 | 413.90 | 415.33 |
| 425.79 | 435.93 | 453.01 | 455.00 | 457.78 | 463.50 |
| 484.58 | 488.14 | 496.00 | 504.35 | 522.18 | 537.10 |
| 544.27 | 548.57 | 562.71 | 588.68 | 603.55 | 608.50 |
| 627.92 | 645.02 | 652.19 | 653.97 | 663.93 | 667.28 |



672.06 716.98 733.07 752.97 757.37 758.00  
769.39 789.98 798.30 810.21 821.87 827.11  
828.60 833.86 855.99 856.93 868.32 873.94  
893.66 901.83 904.97 907.44 908.42 909.01  
911.00 912.94 916.20 940.70 944.85 946.31  
947.67 949.99 957.17 963.63 971.95 974.33  
974.80 977.89 992.97 995.35 1008.47 1011.85  
1020.75 1026.32 1029.11 1039.57 1046.18 1047.09  
1060.80 1063.14 1073.02 1082.40 1088.45 1092.07  
1094.12 1098.56 1102.80 1106.30 1108.83 1115.07  
1123.26 1129.01 1133.19 1135.87 1145.07 1149.10  
1149.47 1158.56 1165.67 1191.06 1191.60 1203.15  
1204.51 1208.07 1216.41 1217.66 1219.38 1241.55  
1256.50 1263.72 1285.74 1293.77 1295.71 1296.85  
1300.27 1301.39 1309.05 1310.18 1311.43 1316.78  
1319.99 1326.82 1337.08 1343.61 1349.17 1349.63  
1351.20 1355.73 1363.95 1366.14 1368.38 1377.05  
1378.29 1382.36 1390.30 1392.86 1394.68 1395.16  
1398.01 1398.94 1403.86 1413.33 1415.36 1416.19  
1434.92 1436.26 1437.57 1461.49 1463.27 1476.09  
1492.21 1495.30 1497.58 1498.64 1499.25 1501.18  
1501.53 1502.35 1503.30 1504.86 1505.96 1506.11  
1507.58 1508.93 1510.16 1515.08 1518.41 1518.71  
1521.48 1522.60 1524.08 1524.91 1526.44 1528.57  
1529.28 1611.03 1613.90 1616.05 1622.64 1646.85  
1651.95 1661.20 1661.23 3008.09 3012.43 3019.59  
3019.73 3024.57 3032.29 3032.42 3033.29 3033.64  
3034.42 3035.47 3037.72 3038.60 3039.69 3040.90  
3045.67 3047.95 3064.03 3064.88 3065.56 3069.60  
3070.78 3074.56 3079.48 3080.73 3091.18 3096.00  
3103.06 3103.94 3104.78 3106.26 3110.77 3111.07  
3113.70 3114.37 3114.55 3118.31 3118.81 3121.37  
3128.06 3146.98 3151.93 3153.91 3165.13 3165.64  
3173.70 3175.32 3178.48 3188.87 3193.07 3199.21  
3207.47 3210.57 3217.42 3458.66 3597.08 3618.16

1C'

14.17 17.18 26.44 28.92 30.66 38.45  
41.11 45.72 53.11 58.14 60.81 63.57  
70.49 75.39 75.85 81.56 84.64 89.11  
92.59 100.68 106.48 110.55 116.09 117.06  
123.79 138.58 146.90 151.79 162.78 168.51  
172.04 184.14 193.46 199.79 205.93 220.34  
226.63 232.41 234.16 243.09 244.12 249.33  
254.11 257.15 264.65 269.03 276.35 278.51  
281.68 285.91 291.57 303.33 307.63 316.39  
338.16 341.56 352.25 362.02 375.33 379.41  
394.37 408.33 412.64 415.83 421.77 421.95  
433.62 451.76 452.99 454.54 460.99 483.12  
488.93 498.81 504.32 517.73 533.38 536.91  
543.47 548.81 551.59 564.91 589.29 609.37  
627.00 630.70 645.09 652.82 655.81 665.44  
671.58 671.76 707.72 719.32 732.46 752.70  
753.09 757.01 766.47 774.52 786.50 798.68  
812.82 817.64 821.32 826.27 827.56 833.46  
851.97 856.15 860.81 868.83 871.74 895.62  
902.22 903.32 907.12 907.55 908.69 911.84

912.10 914.77 919.16 941.49 944.14 945.59  
947.87 949.95 956.99 963.66 969.33 973.59  
973.94 974.93 977.31 981.64 986.78 993.56  
996.12 1003.64 1011.08 1016.30 1020.84 1026.67  
1028.46 1042.07 1045.37 1047.29 1054.83 1061.68  
1063.12 1071.57 1086.95 1088.00 1093.06 1095.16  
1095.89 1099.60 1102.45 1106.25 1109.33 1115.79  
1124.24 1129.15 1132.76 1136.19 1146.17 1150.47  
1155.56 1164.01 1164.79 1190.63 1192.27 1195.74  
1203.54 1203.92 1207.54 1213.87 1215.01 1216.75  
1218.63 1245.99 1252.76 1259.15 1262.70 1287.16  
1294.37 1296.30 1298.10 1299.04 1300.44 1309.04  
1310.97 1311.96 1316.12 1321.00 1324.69 1337.09  
1342.85 1349.61 1350.89 1355.74 1357.12 1360.10  
1362.13 1367.24 1368.70 1376.77 1380.03 1381.13  
1383.72 1391.50 1392.88 1395.11 1395.94 1398.63  
1399.70 1402.96 1413.79 1416.35 1417.14 1435.75  
1435.81 1437.47 1461.54 1464.35 1476.68 1494.21  
1495.64 1496.27 1498.78 1499.64 1500.91 1501.81  
1502.86 1503.16 1503.81 1506.03 1506.25 1506.67  
1509.31 1510.49 1513.25 1514.78 1518.39 1518.63  
1520.06 1522.78 1523.62 1525.69 1527.20 1528.39  
1529.70 1539.48 1610.02 1614.35 1616.61 1620.87  
1646.85 1648.71 1652.93 1660.57 1660.67 3008.61  
3012.79 3019.61 3020.37 3027.59 3029.02 3033.49  
3033.83 3034.66 3034.83 3035.93 3036.17 3039.22  
3039.39 3039.92 3047.41 3053.07 3064.76 3065.02  
3069.45 3070.11 3071.52 3077.54 3078.04 3086.81  
3091.22 3098.98 3101.44 3102.40 3103.48 3104.14  
3110.00 3113.53 3113.94 3114.62 3114.90 3116.19  
3117.93 3121.17 3123.50 3134.34 3139.52 3144.80  
3157.32 3161.92 3162.66 3168.69 3172.57 3176.13  
3177.00 3179.17 3181.06 3183.56 3191.86 3192.36  
3193.43 3200.85 3203.46 3230.57 3459.98 3574.81

1D

10.75 13.09 13.20 16.17 16.69 22.70  
25.00 27.91 30.16 30.92 32.52 34.78  
37.79 38.24 44.34 47.24 48.99 51.67  
54.17 56.35 59.83 62.38 64.98 71.86  
76.73 80.52 81.79 84.04 85.43 88.87  
92.53 94.76 97.92 103.67 105.88 109.01  
110.91 112.23 116.19 121.07 127.26 138.99  
146.56 148.12 150.83 153.94 163.29 164.90  
165.45 171.79 179.52 180.62 186.12 187.98  
189.24 194.09 195.46 202.48 206.16 209.25  
217.99 225.64 226.45 227.65 232.27 233.86  
234.28 241.24 241.46 246.70 251.29 252.88  
253.28 255.52 255.89 259.22 264.42 266.73  
269.24 270.80 273.34 277.51 280.72 281.40  
281.96 284.22 289.82 292.73 298.04 299.20  
301.76 304.84 309.36 312.44 314.60 315.96  
331.32 333.77 336.45 340.83 341.49 359.76  
362.53 364.74 366.49 366.99 369.76 371.06  
371.75 375.31 380.42 383.60 392.10 407.86  
410.99 420.91 432.64 437.78 445.90 450.44  
452.26 458.31 459.22 464.20 467.94 468.54

486.78 490.84 492.27 494.79 495.58 495.71  
499.68 500.73 501.17 503.33 504.17 504.63  
508.02 530.61 535.91 545.36 560.67 591.07  
608.33 625.99 640.89 653.33 664.29 670.59  
671.84 720.18 730.08 746.78 747.25 750.65  
753.31 754.05 754.64 755.57 774.02 779.04  
793.11 798.43 798.48 808.79 811.24 825.27  
827.72 833.32 856.72 861.51 866.06 869.52  
890.50 891.27 891.68 892.14 893.18 893.76  
895.05 895.75 896.01 896.75 900.63 902.14  
905.40 909.60 910.29 912.66 914.92 935.70  
943.46 946.64 947.25 948.76 949.38 950.94  
951.31 951.79 956.20 962.83 973.41 974.04  
975.04 977.10 979.56 980.00 983.45 995.87  
1000.78 1003.11 1008.70 1009.57 1021.02 1024.95  
1029.17 1041.64 1041.99 1042.98 1043.39 1043.76  
1044.55 1045.36 1045.69 1047.63 1048.27 1048.98  
1057.04 1058.77 1065.50 1086.56 1088.07 1092.63  
1093.89 1096.80 1103.43 1106.18 1107.75 1110.82  
1125.43 1129.38 1131.83 1134.60 1143.09 1148.68  
1149.75 1163.21 1189.62 1192.59 1201.90 1204.54  
1208.59 1210.94 1212.51 1218.28 1229.54 1229.92  
1236.19 1237.74 1239.71 1240.04 1241.28 1241.62  
1242.14 1243.93 1245.06 1245.19 1245.49 1251.54  
1264.51 1284.36 1289.53 1292.14 1298.57 1300.57  
1303.79 1306.03 1307.44 1307.81 1312.05 1317.04  
1330.52 1331.78 1342.12 1349.32 1349.85 1352.91  
1356.48 1362.17 1362.78 1363.63 1369.37 1377.58  
1380.46 1385.90 1390.78 1391.55 1394.32 1394.75  
1396.01 1396.33 1397.17 1398.04 1398.11 1398.79  
1399.24 1400.80 1403.16 1403.84 1405.26 1413.74  
1415.33 1416.56 1423.82 1424.29 1428.51 1428.94  
1434.37 1435.75 1436.76 1459.24 1464.88 1475.83  
1482.93 1483.15 1485.17 1485.56 1486.22 1487.03  
1487.65 1489.43 1490.50 1492.46 1492.75 1494.91  
1495.68 1496.67 1498.56 1499.37 1500.33 1500.78  
1500.86 1502.44 1502.92 1504.26 1505.16 1506.50  
1506.98 1507.41 1507.63 1508.26 1508.34 1509.02  
1509.38 1510.06 1510.91 1512.48 1514.02 1515.42  
1516.82 1517.86 1518.75 1519.36 1519.54 1520.65  
1522.59 1523.16 1524.44 1527.48 1527.86 1528.34  
1529.83 1613.22 1613.58 1615.36 1619.66 1643.64  
1655.07 1659.21 1721.69 2984.55 2989.82 3007.72  
3009.60 3010.49 3010.77 3011.69 3012.11 3013.40  
3013.80 3019.32 3019.46 3020.92 3022.15 3022.36  
3022.69 3025.11 3026.28 3029.52 3032.26 3033.12  
3034.47 3034.71 3038.15 3040.53 3040.80 3043.84  
3055.14 3060.08 3062.50 3063.71 3064.83 3065.79  
3069.40 3070.06 3072.23 3073.35 3073.92 3075.72  
3075.86 3077.85 3079.93 3080.22 3083.07 3083.69  
3084.25 3085.32 3085.59 3086.16 3088.72 3089.19  
3089.87 3091.62 3092.16 3092.40 3098.65 3100.50  
3100.98 3101.69 3102.01 3102.21 3102.70 3103.03  
3104.25 3107.89 3108.24 3110.73 3113.53 3114.25  
3115.56 3115.83 3116.17 3116.92 3121.37 3124.60  
3126.40 3126.48 3130.91 3153.10 3158.67 3161.92  
3170.58 3176.07 3176.48 3177.49 3182.25 3182.75  
3189.74 3193.20 3199.51 3204.87 3287.71 3557.95

=====  
ID'  
=====

11.05 13.31 15.68 17.28 19.54 21.65  
24.75 28.67 30.92 31.98 33.65 35.48  
41.44 45.42 48.22 48.86 51.43 54.36  
55.43 58.29 59.33 65.53 66.06 71.56  
74.04 76.34 78.26 81.28 85.33 86.70  
89.66 95.25 96.69 96.93 98.11 100.95  
104.72 106.16 108.75 112.99 114.18 118.26  
122.94 125.45 130.15 138.66 146.42 150.28  
154.25 154.82 161.02 164.78 167.66 170.70  
171.15 178.44 182.50 188.83 190.46 193.19  
195.30 198.59 208.27 213.66 217.57 223.89  
226.51 230.09 232.12 233.35 237.97 240.74  
241.46 242.54 243.17 247.03 247.46 251.61  
252.90 255.56 256.27 262.89 264.10 265.54  
267.68 269.88 272.33 273.87 280.41 283.92  
286.61 289.30 296.76 298.74 299.06 301.16  
301.80 302.04 305.08 312.02 326.61 332.59  
334.26 336.27 341.74 363.14 364.55 365.77  
366.65 369.17 370.58 372.51 374.77 377.25  
380.27 384.22 393.05 409.98 416.32 419.84  
420.94 435.10 445.96 450.61 452.09 458.19  
458.67 462.15 466.93 467.44 471.38 486.90  
491.00 491.30 494.23 495.34 496.11 498.81  
499.38 501.33 501.50 503.16 504.64 507.70  
529.50 535.84 544.94 550.83 560.89 562.80  
591.08 608.46 625.84 635.81 641.32 653.45  
666.93 670.24 673.10 705.88 714.21 727.77  
736.96 745.95 748.29 750.22 750.80 753.55  
754.25 754.54 770.16 773.92 780.42 798.99  
809.38 811.28 825.19 827.07 831.07 833.24  
842.44 851.73 856.98 866.15 868.99 885.71  
890.53 891.43 891.72 892.54 893.01 894.97  
895.72 896.70 899.39 901.10 901.94 904.96  
906.40 909.50 910.52 911.12 912.77 935.95  
943.84 946.75 947.33 947.51 949.06 949.14  
950.08 954.76 956.55 962.81 967.69 970.17  
973.76 975.12 976.30 977.33 979.61 980.73  
988.99 989.71 1000.80 1003.42 1009.23 1009.47  
1018.21 1021.65 1025.16 1028.95 1040.26 1040.61  
1043.20 1043.52 1044.02 1044.34 1044.53 1046.20  
1047.72 1048.39 1051.08 1056.10 1056.55 1057.03  
1065.93 1084.29 1086.87 1093.20 1094.42 1098.04  
1103.52 1106.69 1108.01 1110.46 1111.42 1125.55  
1129.83 1132.34 1135.00 1142.84 1148.67 1150.11  
1163.43 1189.83 1191.26 1193.69 1202.55 1204.77  
1207.76 1209.04 1211.27 1214.21 1218.61 1220.37  
1229.18 1233.24 1236.21 1236.32 1238.22 1240.03  
1241.75 1242.31 1242.60 1243.44 1245.32 1246.01  
1248.09 1252.32 1258.86 1266.37 1284.63 1290.24  
1292.21 1298.63 1300.71 1304.16 1306.16 1307.02  
1307.61 1308.81 1312.42 1317.82 1331.12 1332.56  
1341.96 1349.69 1353.52 1356.25 1362.31 1362.95  
1363.82 1365.19 1369.30 1377.67 1380.83 1385.99  
1390.84 1392.28 1394.88 1396.53 1396.79 1397.23  
1397.67 1398.28 1398.48 1398.79 1399.41 1400.91

1404.76 1405.35 1406.63 1408.43 1413.42 1415.53  
 1416.83 1423.47 1424.06 1430.54 1433.20 1434.28  
 1435.95 1436.89 1460.65 1464.22 1476.07 1482.31  
 1482.67 1483.49 1484.87 1485.48 1486.26 1487.71  
 1488.40 1489.20 1490.76 1492.66 1494.47 1495.76  
 1497.08 1498.46 1498.80 1500.42 1500.86 1500.97  
 1502.96 1503.16 1504.16 1505.35 1507.02 1507.27  
 1507.39 1507.58 1507.67 1508.12 1508.21 1508.45  
 1508.87 1510.40 1512.48 1514.24 1514.84 1516.20  
 1518.26 1518.66 1519.73 1520.06 1520.92 1522.43  
 1522.73 1523.60 1524.83 1526.72 1527.87 1528.82  
 1530.50 1540.55 1613.13 1613.87 1615.61 1620.57  
 1644.96 1650.09 1659.29 1660.23 1738.32 2986.88  
 2989.00 3010.07 3010.71 3010.91 3011.71 3012.44  
 3012.80 3018.46 3018.77 3021.09 3021.69 3021.76  
 3022.40 3022.59 3027.66 3028.94 3030.79 3031.92  
 3033.80 3035.22 3035.36 3035.82 3038.63 3040.61  
 3040.94 3043.93 3056.87 3061.34 3063.46 3065.45  
 3067.12 3067.29 3070.23 3071.46 3072.21 3074.52  
 3075.96 3076.16 3076.96 3081.17 3082.39 3083.11  
 3083.58 3084.20 3085.96 3086.41 3087.18 3089.36  
 3090.15 3091.60 3092.59 3098.11 3098.94 3100.33  
 3101.05 3102.01 3102.86 3103.08 3103.33 3107.73  
 3108.22 3110.78 3111.69 3112.00 3116.03 3116.14  
 3116.26 3116.95 3117.43 3117.86 3118.47 3123.64  
 3124.71 3125.20 3127.19 3128.49 3128.61 3128.85  
 3159.10 3162.64 3165.86 3177.59 3178.16 3178.93  
 3180.06 3183.39 3183.73 3187.19 3194.40 3196.05  
 3203.51 3203.66 3215.59 3229.42 3232.30 3262.38

750.00 751.75 751.92 753.38 764.47 778.41  
 782.29 795.57 816.68 816.74 817.27 821.47  
 826.54 842.89 861.22 866.82 871.08 881.29  
 888.53 889.81 891.98 893.24 893.29 894.32  
 894.92 900.83 902.10 906.29 907.46 908.51  
 910.69 916.61 917.04 918.60 920.30 938.88  
 941.30 941.54 943.61 945.44 946.62 948.88  
 949.09 950.29 951.84 953.57 954.70 966.29  
 973.06 974.44 975.13 979.23 986.46 992.84  
 994.26 997.46 1000.24 1001.64 1007.35 1010.21  
 1026.03 1027.23 1041.89 1042.25 1042.50 1043.89  
 1044.22 1044.28 1045.08 1045.66 1049.60 1049.84  
 1058.87 1060.69 1063.62 1071.37 1084.37 1086.65  
 1092.46 1094.15 1095.16 1101.49 1104.77 1108.30  
 1114.97 1125.05 1126.49 1130.05 1135.04 1146.30  
 1151.64 1154.29 1158.13 1185.54 1191.34 1200.47  
 1202.38 1206.63 1213.03 1215.57 1216.61 1231.85  
 1234.41 1240.68 1241.71 1242.71 1243.12 1244.06  
 1245.01 1245.36 1252.51 1253.03 1257.65 1258.73  
 1260.06 1265.09 1284.43 1287.23 1294.71 1297.52  
 1299.31 1301.23 1307.10 1309.24 1310.32 1315.62  
 1320.00 1324.65 1335.68 1342.36 1348.65 1350.96  
 1353.57 1360.27 1360.78 1367.32 1368.93 1378.81  
 1380.63 1384.81 1387.75 1389.90 1391.44 1393.62  
 1394.63 1396.48 1397.02 1397.28 1398.18 1398.45  
 1399.20 1399.88 1400.44 1401.68 1413.21 1414.85  
 1415.75 1416.84 1422.04 1424.92 1427.87 1428.47  
 1434.30 1434.70 1436.75 1437.95 1458.88 1464.63  
 1472.92 1484.54 1485.59 1486.43 1486.91 1487.50  
 1488.62 1488.77 1488.96 1491.50 1492.18 1494.95  
 1495.72 1496.94 1498.14 1499.44 1500.12 1500.60  
 1500.94 1502.60 1503.36 1503.49 1505.55 1506.17  
 1506.67 1507.88 1508.35 1508.44 1509.10 1509.28  
 1509.51 1510.11 1510.94 1512.17 1514.92 1516.04  
 1517.01 1517.81 1517.96 1518.17 1518.76 1519.31  
 1522.46 1523.24 1524.71 1525.44 1525.77 1528.71  
 1531.82 1539.94 1590.11 1608.31 1611.30 1615.43  
 1621.02 1643.56 1655.93 1771.75 2981.73 2998.59  
 3007.52 3007.68 3008.91 3009.27 3009.61 3010.85  
 3012.17 3015.93 3017.13 3018.98 3020.28 3024.70  
 3025.68 3026.15 3026.50 3028.48 3032.28 3034.23  
 3034.51 3035.68 3037.43 3038.11 3038.87 3039.48  
 3045.20 3054.12 3055.31 3058.07 3061.97 3063.33  
 3064.75 3067.05 3067.57 3070.81 3073.79 3074.10  
 3075.80 3076.85 3077.38 3078.06 3079.45 3079.68  
 3083.79 3084.71 3088.27 3088.69 3090.16 3090.86  
 3092.03 3093.07 3096.47 3096.76 3100.28 3101.02  
 3101.44 3101.69 3102.71 3104.09 3104.12 3104.85  
 3107.83 3110.49 3111.81 3112.61 3113.57 3113.71  
 3114.17 3116.10 3117.18 3118.20 3122.74 3127.10  
 3130.21 3130.82 3132.33 3135.94 3144.81 3155.99  
 3162.45 3175.55 3176.14 3181.14 3185.13 3186.65  
 3186.71 3194.19 3201.63 3229.89 3409.42 3544.45

=====  
 1D-TS  
 =====

-639.92 10.32 13.33 17.72 21.99 23.56  
 24.84 26.10 27.06 27.96 30.50 34.10  
 37.13 40.10 41.09 41.74 46.78 48.53  
 50.11 50.83 53.94 62.50 66.82 70.99  
 75.15 77.78 79.98 82.83 85.02 87.72  
 89.49 90.47 93.63 100.92 103.04 104.55  
 107.33 111.66 114.31 116.82 119.33 126.73  
 130.88 142.86 143.43 150.50 153.39 156.52  
 161.96 166.70 169.16 172.22 177.23 189.38  
 190.81 193.96 198.11 205.79 207.14 213.92  
 217.85 220.79 225.24 228.80 230.17 235.24  
 240.12 242.91 243.98 247.37 249.95 251.29  
 251.39 254.18 259.17 259.91 261.36 264.52  
 267.14 269.12 269.76 271.40 273.54 276.53  
 284.86 292.24 297.16 299.44 302.46 302.86  
 303.92 305.88 307.15 312.16 313.19 316.35  
 329.98 336.44 337.99 340.31 342.00 356.64  
 358.15 363.83 364.09 369.31 369.81 372.06  
 373.96 376.31 376.52 388.39 402.76 410.21  
 418.16 419.76 430.10 437.62 448.42 449.64  
 452.48 457.06 457.30 458.95 460.08 475.25  
 475.89 482.07 483.90 491.94 494.91 497.32  
 499.37 500.73 502.44 504.39 504.68 517.76  
 526.14 533.22 542.38 549.28 557.00 575.41  
 592.35 627.27 633.84 652.07 662.62 667.66  
 670.58 714.07 721.66 723.99 738.67 749.43

=====  
 1D'-TS  
 =====

-823.02 10.53 15.32 17.78 19.92 21.14  
 22.07 26.15 27.59 29.17 34.62 37.44

37.94 39.86 42.96 47.19 49.28 50.94  
 54.63 57.20 59.39 60.95 62.13 67.13  
 69.75 73.62 73.99 76.07 78.19 82.58  
 86.25 88.66 89.25 90.55 94.49 95.85  
 97.26 98.76 101.47 103.17 106.30 111.57  
 114.50 118.97 127.31 128.95 131.93 138.93  
 142.67 146.97 153.41 157.58 158.88 166.10  
 168.82 171.07 176.47 181.98 188.36 191.65  
 194.82 196.94 208.19 212.31 215.27 224.04  
 225.67 227.01 231.40 233.39 236.18 241.15  
 243.64 245.02 246.43 247.63 249.66 252.24  
 254.05 255.99 257.07 258.63 262.63 264.62  
 266.43 270.26 272.10 273.50 279.54 281.18  
 283.81 288.64 289.81 293.53 298.93 300.28  
 301.30 305.58 306.11 307.44 312.14 316.25  
 328.14 333.99 336.62 341.89 362.11 364.38  
 366.24 368.20 370.62 370.77 371.43 374.52  
 374.87 380.71 383.85 393.08 409.53 418.69  
 423.07 435.09 444.84 446.04 450.53 452.21  
 457.99 458.13 460.18 466.78 469.89 483.97  
 487.11 490.62 493.27 496.34 496.84 498.03  
 498.78 502.20 502.51 503.43 506.75 508.14  
 529.22 535.50 542.13 545.78 561.25 566.36  
 590.76 608.64 625.74 627.22 641.50 641.92  
 653.29 666.49 671.59 673.04 711.65 714.94  
 728.60 748.19 748.37 750.67 753.06 754.85  
 754.94 759.86 774.10 777.09 780.66 798.94  
 808.42 811.40 824.65 827.12 833.47 835.56  
 842.41 852.68 856.84 865.85 869.35 887.21  
 891.30 892.70 893.19 893.31 894.28 895.74  
 895.90 897.50 900.79 902.17 904.95 908.72  
 909.73 910.23 910.92 912.32 915.38 924.84  
 935.33 943.55 946.65 947.36 948.63 948.96  
 949.62 951.54 956.42 959.34 962.80 965.28  
 968.32 971.33 973.45 975.03 976.80 980.13  
 985.79 986.41 988.59 999.91 1001.17 1007.68  
 1009.89 1012.92 1021.91 1025.02 1028.96 1040.33  
 1042.15 1043.59 1043.87 1044.15 1044.21 1045.28  
 1047.22 1048.18 1051.58 1054.23 1056.06 1056.39  
 1060.62 1065.84 1085.47 1086.89 1092.23 1093.93  
 1098.89 1103.64 1105.98 1107.17 1108.16 1110.95  
 1125.77 1129.36 1132.15 1135.02 1142.73 1148.54  
 1149.75 1163.19 1189.81 1191.21 1191.92 1201.70  
 1204.73 1207.95 1208.33 1210.61 1212.79 1218.66  
 1230.17 1235.05 1236.13 1238.58 1239.27 1241.82  
 1242.00 1243.02 1244.30 1244.92 1245.63 1250.31  
 1255.78 1256.83 1259.07 1265.72 1284.50 1284.74  
 1290.21 1291.56 1299.44 1300.71 1303.57 1305.25  
 1307.67 1310.74 1311.60 1317.34 1330.82 1331.86  
 1341.99 1350.07 1353.10 1356.04 1362.10 1362.84  
 1363.19 1363.47 1369.25 1377.36 1380.98 1386.01  
 1390.52 1391.39 1394.34 1395.60 1395.75 1396.37  
 1397.09 1397.97 1398.17 1399.67 1400.62 1400.88  
 1405.07 1405.29 1409.73 1413.28 1415.12 1415.99  
 1416.84 1421.44 1424.70 1430.00 1433.92 1435.64  
 1436.78 1440.53 1460.06 1466.05 1476.40 1477.83  
 1479.95 1481.61 1484.68 1486.20 1486.33 1487.14  
 1487.64 1489.20 1490.06 1490.26 1492.22 1493.86

1494.97 1495.96 1496.89 1498.79 1499.07 1500.30  
 1501.34 1502.69 1502.79 1504.35 1505.37 1505.47  
 1506.92 1507.16 1507.77 1508.13 1508.45 1508.79  
 1508.94 1509.70 1510.12 1512.31 1513.62 1514.71  
 1515.27 1516.04 1518.14 1519.77 1519.94 1520.98  
 1521.85 1522.68 1522.85 1523.44 1524.86 1527.92  
 1528.54 1531.77 1538.02 1613.59 1614.11 1617.51  
 1622.38 1631.67 1644.47 1657.75 1659.96 1739.85  
 2994.87 3007.93 3008.98 3009.95 3010.24 3010.53  
 3010.94 3013.61 3016.87 3019.11 3019.64 3021.98  
 3022.89 3023.47 3023.53 3028.24 3029.68 3030.76  
 3032.23 3033.17 3034.38 3034.59 3037.79 3040.87  
 3041.51 3041.70 3043.18 3054.26 3060.21 3063.12  
 3064.55 3067.35 3069.32 3070.41 3072.09 3074.31  
 3074.79 3075.06 3076.98 3078.48 3078.88 3079.72  
 3079.92 3083.04 3083.56 3086.07 3087.98 3088.82  
 3090.69 3093.50 3093.55 3094.50 3095.51 3099.44  
 3101.43 3102.37 3102.47 3103.25 3103.46 3107.57  
 3107.65 3111.93 3113.04 3115.38 3115.43 3115.49  
 3116.43 3118.23 3119.57 3120.21 3122.26 3125.15  
 3127.21 3128.19 3128.49 3132.77 3134.36 3140.52  
 3156.88 3160.82 3165.01 3172.21 3175.58 3176.86  
 3177.66 3181.59 3182.99 3183.72 3188.47 3194.26  
 3199.34 3200.19 3206.70 3208.75 3233.74 3440.61

=====

1E

=====

10.70 12.12 14.46 15.66 23.25 24.23  
 26.08 27.06 27.97 30.76 33.24 35.86  
 36.94 38.22 41.55 44.16 46.61 48.20  
 50.26 58.81 64.42 66.55 69.10 72.63  
 73.68 77.24 79.57 80.07 82.67 85.04  
 88.39 89.53 94.44 97.61 98.84 103.79  
 106.33 107.95 111.45 116.57 119.22 125.03  
 127.86 142.26 144.84 150.79 150.97 155.53  
 158.42 162.85 168.83 172.05 174.19 183.42  
 190.46 192.07 195.12 200.50 206.11 208.74  
 219.19 225.74 227.78 230.51 234.33 239.60  
 240.27 244.17 246.44 250.59 252.29 252.70  
 254.36 254.70 257.22 258.85 262.94 264.55  
 264.94 265.88 270.58 275.62 278.54 279.45  
 285.81 293.15 299.00 299.10 302.64 304.13  
 305.55 309.58 311.10 312.10 315.90 317.34  
 318.70 337.54 339.22 340.96 343.71 360.00  
 360.70 363.72 364.37 368.09 369.26 371.71  
 374.49 378.37 383.26 390.77 410.78 418.90  
 421.12 428.02 429.74 438.09 448.77 450.46  
 452.45 454.08 454.93 455.66 458.98 460.05  
 479.46 481.93 485.26 493.59 496.95 498.47  
 499.27 500.94 502.13 504.78 506.66 517.41  
 528.01 534.77 542.37 549.92 557.75 588.36  
 605.90 627.65 637.63 652.48 664.63 669.58  
 670.61 721.33 725.38 738.95 742.78 748.45  
 749.18 751.22 751.56 755.53 766.34 783.82  
 796.32 815.42 818.21 821.62 825.90 828.03  
 854.05 860.71 866.91 868.29 870.06 888.05  
 890.06 890.59 890.85 891.58 893.00 894.58  
 901.65 901.83 907.03 907.49 908.69 910.33

|         |         |         |         |         |         |         |         |         |         |         |         |
|---------|---------|---------|---------|---------|---------|---------|---------|---------|---------|---------|---------|
| 913.20  | 913.89  | 919.15  | 920.00  | 923.80  | 940.83  | 117.91  | 123.13  | 128.04  | 129.01  | 137.22  | 139.53  |
| 943.44  | 946.07  | 946.40  | 946.91  | 949.06  | 949.54  | 148.28  | 151.52  | 153.97  | 156.89  | 161.42  | 166.14  |
| 949.61  | 951.60  | 953.51  | 962.68  | 970.58  | 973.39  | 166.41  | 174.13  | 180.81  | 183.11  | 188.90  | 192.05  |
| 974.52  | 975.07  | 978.92  | 986.78  | 993.31  | 994.31  | 196.75  | 200.09  | 213.03  | 215.38  | 223.01  | 224.28  |
| 998.04  | 1001.48 | 1005.58 | 1010.99 | 1014.55 | 1025.60 | 224.48  | 227.45  | 235.23  | 235.62  | 238.75  | 242.16  |
| 1027.57 | 1040.80 | 1041.58 | 1041.84 | 1042.53 | 1042.66 | 245.37  | 246.02  | 246.95  | 248.08  | 249.17  | 252.27  |
| 1044.10 | 1044.46 | 1045.19 | 1048.23 | 1048.84 | 1059.12 | 254.72  | 255.66  | 256.32  | 259.35  | 262.82  | 266.18  |
| 1061.05 | 1063.37 | 1070.08 | 1086.36 | 1086.84 | 1092.36 | 269.19  | 270.24  | 271.41  | 278.36  | 280.28  | 283.79  |
| 1094.31 | 1097.82 | 1103.22 | 1105.35 | 1110.24 | 1115.87 | 285.97  | 288.82  | 291.90  | 299.49  | 300.56  | 301.88  |
| 1126.56 | 1129.39 | 1131.42 | 1136.19 | 1146.35 | 1153.03 | 305.97  | 309.30  | 309.38  | 311.89  | 312.85  | 320.76  |
| 1154.03 | 1163.66 | 1188.51 | 1192.34 | 1202.82 | 1204.77 | 333.95  | 336.29  | 341.79  | 362.42  | 363.10  | 365.29  |
| 1206.75 | 1214.53 | 1215.35 | 1218.56 | 1226.99 | 1231.89 | 365.89  | 368.98  | 370.67  | 373.06  | 374.20  | 376.81  |
| 1233.69 | 1239.15 | 1241.17 | 1241.52 | 1241.96 | 1242.41 | 380.70  | 384.51  | 391.76  | 410.48  | 418.42  | 422.93  |
| 1243.49 | 1243.95 | 1250.78 | 1251.68 | 1252.30 | 1260.59 | 426.89  | 434.76  | 443.23  | 445.93  | 450.98  | 452.19  |
| 1262.22 | 1270.64 | 1286.56 | 1292.85 | 1296.67 | 1297.44 | 457.01  | 457.65  | 460.38  | 466.83  | 478.43  | 483.61  |
| 1301.30 | 1302.89 | 1308.16 | 1310.33 | 1311.34 | 1314.96 | 486.92  | 489.68  | 494.86  | 496.52  | 497.51  | 498.49  |
| 1324.05 | 1327.09 | 1336.11 | 1342.76 | 1350.37 | 1351.97 | 499.04  | 502.15  | 502.98  | 507.26  | 508.08  | 514.34  |
| 1353.37 | 1360.40 | 1362.87 | 1366.93 | 1368.99 | 1380.46 | 528.69  | 535.45  | 545.13  | 561.29  | 567.32  | 568.47  |
| 1381.83 | 1385.89 | 1389.29 | 1390.42 | 1391.73 | 1393.76 | 591.40  | 608.28  | 626.09  | 634.27  | 641.81  | 653.60  |
| 1393.98 | 1394.47 | 1394.75 | 1395.13 | 1396.39 | 1398.48 | 666.88  | 671.75  | 672.99  | 712.82  | 715.02  | 727.34  |
| 1399.14 | 1399.39 | 1401.60 | 1401.81 | 1414.39 | 1415.44 | 748.30  | 748.87  | 750.00  | 752.66  | 753.87  | 754.05  |
| 1416.51 | 1416.99 | 1419.06 | 1419.91 | 1427.37 | 1434.38 | 756.19  | 773.81  | 778.62  | 781.51  | 799.36  | 807.75  |
| 1435.12 | 1436.68 | 1437.46 | 1460.84 | 1465.40 | 1475.22 | 811.04  | 825.48  | 827.59  | 832.93  | 833.24  | 838.58  |
| 1485.29 | 1486.10 | 1486.99 | 1487.29 | 1487.68 | 1488.11 | 853.30  | 856.93  | 866.13  | 869.25  | 887.09  | 888.43  |
| 1488.56 | 1490.66 | 1492.07 | 1493.01 | 1494.30 | 1495.50 | 891.54  | 892.59  | 892.69  | 893.60  | 895.10  | 895.41  |
| 1497.08 | 1498.56 | 1499.45 | 1499.99 | 1500.55 | 1500.74 | 896.20  | 898.14  | 900.61  | 902.28  | 905.16  | 909.02  |
| 1502.42 | 1503.03 | 1503.71 | 1504.86 | 1505.62 | 1505.75 | 910.25  | 911.75  | 912.71  | 920.89  | 927.96  | 935.08  |
| 1506.67 | 1507.97 | 1508.24 | 1508.58 | 1509.05 | 1509.31 | 935.35  | 943.54  | 946.64  | 947.23  | 949.36  | 949.60  |
| 1509.68 | 1510.47 | 1511.63 | 1512.69 | 1514.55 | 1517.72 | 949.86  | 951.61  | 956.44  | 963.42  | 965.88  | 970.28  |
| 1518.27 | 1518.55 | 1519.15 | 1520.15 | 1520.97 | 1522.31 | 973.61  | 974.47  | 975.25  | 977.27  | 981.30  | 982.80  |
| 1522.73 | 1523.75 | 1525.45 | 1526.95 | 1528.42 | 1531.87 | 985.92  | 988.61  | 998.91  | 999.24  | 1005.98 | 1008.62 |
| 1535.64 | 1561.31 | 1611.87 | 1613.24 | 1617.86 | 1621.93 | 1010.02 | 1021.54 | 1025.17 | 1028.78 | 1040.80 | 1042.28 |
| 1643.37 | 1647.22 | 1659.70 | 2086.12 | 2998.64 | 3000.57 | 1043.35 | 1043.85 | 1043.95 | 1044.10 | 1045.89 | 1046.72 |
| 3001.51 | 3005.57 | 3006.64 | 3007.59 | 3008.88 | 3009.55 | 1048.86 | 1052.00 | 1056.68 | 1057.11 | 1058.36 | 1060.07 |
| 3011.70 | 3016.21 | 3017.27 | 3017.35 | 3019.78 | 3022.81 | 1064.59 | 1085.56 | 1086.71 | 1092.97 | 1095.34 | 1098.84 |
| 3024.42 | 3027.44 | 3027.86 | 3031.30 | 3032.82 | 3034.69 | 1102.88 | 1104.20 | 1106.36 | 1106.93 | 1110.89 | 1125.55 |
| 3035.47 | 3037.54 | 3038.31 | 3038.46 | 3039.26 | 3040.10 | 1129.89 | 1131.87 | 1134.92 | 1141.95 | 1147.45 | 1148.74 |
| 3045.49 | 3049.87 | 3058.27 | 3063.56 | 3064.43 | 3066.29 | 1162.87 | 1189.24 | 1189.55 | 1191.86 | 1192.82 | 1200.21 |
| 3067.06 | 3067.67 | 3067.83 | 3070.58 | 3071.51 | 3072.38 | 1204.54 | 1205.51 | 1208.50 | 1210.67 | 1212.70 | 1218.49 |
| 3073.82 | 3075.21 | 3076.31 | 3076.65 | 3077.48 | 3078.32 | 1222.52 | 1229.94 | 1234.17 | 1237.34 | 1238.62 | 1241.30 |
| 3082.83 | 3084.43 | 3084.94 | 3086.15 | 3087.91 | 3090.21 | 1241.90 | 1242.37 | 1243.27 | 1243.73 | 1245.64 | 1248.66 |
| 3092.31 | 3092.39 | 3094.34 | 3098.43 | 3098.95 | 3099.19 | 1255.06 | 1265.72 | 1266.65 | 1274.66 | 1284.52 | 1288.42 |
| 3100.67 | 3101.63 | 3102.38 | 3102.58 | 3105.69 | 3108.41 | 1289.32 | 1291.92 | 1297.83 | 1300.50 | 1303.53 | 1304.79 |
| 3110.58 | 3111.36 | 3112.10 | 3112.92 | 3113.34 | 3114.98 | 1307.32 | 1311.16 | 1311.55 | 1317.30 | 1328.93 | 1331.75 |
| 3115.34 | 3115.82 | 3116.66 | 3118.16 | 3119.94 | 3123.59 | 1341.73 | 1350.37 | 1353.32 | 1356.25 | 1360.62 | 1362.03 |
| 3127.23 | 3130.18 | 3130.70 | 3131.80 | 3145.48 | 3156.29 | 1363.66 | 1363.90 | 1369.14 | 1378.05 | 1380.60 | 1386.02 |
| 3163.28 | 3175.94 | 3176.67 | 3181.13 | 3187.25 | 3187.37 | 1390.81 | 1392.30 | 1394.32 | 1395.64 | 1396.32 | 1396.56 |
| 3187.74 | 3193.97 | 3200.85 | 3230.27 | 3439.91 | 3539.81 | 1397.35 | 1398.03 | 1398.08 | 1400.07 | 1400.84 | 1401.71 |
| =====   |         |         |         |         |         |         |         |         |         |         |         |
| 1E'     |         |         |         |         |         |         |         |         |         |         |         |
| =====   |         |         |         |         |         |         |         |         |         |         |         |
| 10.65   | 15.86   | 19.22   | 21.53   | 22.84   | 24.13   | 1436.66 | 1445.38 | 1459.40 | 1466.00 | 1475.83 | 1479.89 |
| 24.80   | 27.82   | 29.58   | 35.38   | 35.50   | 37.86   | 1481.74 | 1484.67 | 1485.92 | 1486.35 | 1487.45 | 1487.72 |
| 41.36   | 44.23   | 45.57   | 48.28   | 50.24   | 53.01   | 1488.99 | 1490.23 | 1491.32 | 1491.81 | 1493.77 | 1495.11 |
| 54.94   | 57.70   | 60.78   | 61.64   | 66.30   | 69.45   | 1495.66 | 1496.15 | 1496.65 | 1498.61 | 1499.32 | 1500.37 |
| 71.39   | 75.07   | 75.95   | 79.64   | 83.40   | 84.93   | 1501.24 | 1502.69 | 1502.81 | 1504.25 | 1505.10 | 1506.87 |
| 87.07   | 88.47   | 90.78   | 93.25   | 95.08   | 96.06   | 1507.03 | 1507.68 | 1508.08 | 1508.58 | 1508.73 | 1509.20 |
| 98.35   | 98.87   | 102.21  | 105.99  | 109.57  | 112.45  | 1509.89 | 1510.52 | 1510.99 | 1512.32 | 1513.19 | 1515.22 |
|         |         |         |         |         |         | 1516.02 | 1518.13 | 1518.17 | 1519.56 | 1520.14 | 1520.69 |

1522.36 1522.96 1523.47 1524.58 1525.53 1528.03  
1528.39 1531.24 1564.83 1611.58 1612.62 1617.10  
1621.55 1623.19 1642.29 1651.95 1658.94 2182.77  
2995.91 3006.84 3008.80 3009.30 3010.05 3010.26  
3013.74 3016.01 3018.40 3018.93 3019.21 3020.97  
3022.75 3023.38 3027.37 3028.63 3029.04 3031.78  
3032.52 3034.08 3034.37 3035.19 3038.53 3039.05  
3040.73 3043.98 3048.45 3054.14 3058.31 3063.41  
3063.50 3067.69 3068.05 3070.61 3071.28 3073.27  
3073.48 3073.99 3077.61 3077.77 3080.59 3082.05  
3082.56 3083.20 3087.22 3088.22 3089.66 3092.21  
3093.11 3094.37 3094.89 3095.35 3097.54 3099.73  
3100.54 3101.41 3102.03 3102.23 3103.21 3106.52  
3107.65 3108.87 3109.96 3112.18 3116.13 3116.51  
3116.55 3117.40 3117.92 3118.86 3124.90 3125.59  
3126.77 3128.12 3135.47 3137.77 3138.63 3141.89  
3155.22 3165.24 3165.51 3167.75 3174.19 3176.94  
3177.39 3178.37 3183.93 3184.14 3188.45 3193.98  
3198.45 3198.56 3205.12 3206.02 3220.60 3460.25

IF

13.88 17.30 21.73 24.97 27.29 28.88  
32.00 34.21 37.53 38.54 41.40 46.84  
48.40 52.31 55.83 58.06 59.69 62.53  
66.31 67.74 70.59 73.06 78.00 79.50  
83.60 85.01 86.19 93.26 94.56 101.26  
102.95 104.07 111.20 111.77 113.05 119.87  
120.84 128.37 137.25 141.44 142.54 147.64  
150.74 153.10 157.75 163.61 173.57 178.68  
183.35 191.48 195.48 197.33 200.13 208.79  
212.32 215.03 221.87 226.76 227.39 229.58  
231.01 234.71 238.38 240.36 246.09 248.26  
252.09 252.33 253.96 256.27 261.46 264.01  
264.26 269.01 269.88 273.23 277.75 281.45  
285.05 289.01 295.16 300.28 302.14 302.88  
306.95 307.74 322.40 332.24 332.81 335.62  
339.98 347.50 363.13 364.57 365.05 366.09  
369.77 372.03 375.12 380.58 381.54 388.18  
391.65 411.53 412.66 432.63 445.71 450.70  
453.50 454.87 455.11 456.98 460.49 464.16  
484.59 490.03 494.31 495.45 496.50 497.19  
500.29 501.66 503.59 505.30 515.16 528.19  
536.60 547.82 565.07 589.36 609.70 625.65  
643.50 653.47 665.45 670.38 672.46 716.74  
727.33 749.03 749.54 750.80 751.90 752.46  
753.02 774.70 791.83 800.22 801.99 808.82  
811.89 824.02 826.12 833.98 857.13 858.43  
866.40 867.34 868.92 881.63 888.92 890.73  
891.39 891.84 892.24 894.65 900.69 900.90  
903.96 905.28 910.05 910.16 911.98 915.98  
935.86 944.54 946.86 947.33 947.70 947.81  
950.21 951.07 955.81 958.87 972.83 973.82  
973.97 976.11 981.16 990.89 998.55 999.48  
1002.74 1007.00 1009.02 1020.28 1024.83 1028.75  
1039.11 1041.64 1042.72 1043.07 1043.49 1044.19  
1045.29 1045.98 1048.32 1055.43 1058.69 1065.38  
1086.32 1088.09 1093.49 1094.73 1095.53 1099.03

1103.17 1106.58 1112.55 1124.95 1129.43 1131.11  
1134.41 1140.98 1145.82 1147.46 1162.18 1190.48  
1191.57 1199.64 1202.67 1208.45 1211.44 1211.95  
1217.94 1233.35 1234.53 1237.17 1238.24 1240.45  
1241.75 1242.44 1243.02 1243.75 1246.49 1250.77  
1263.78 1284.42 1290.16 1292.56 1295.50 1301.05  
1301.69 1306.51 1307.63 1310.13 1312.57 1317.80  
1323.23 1332.57 1342.91 1347.98 1349.48 1352.19  
1352.87 1359.97 1364.41 1369.16 1378.53 1379.15  
1384.90 1387.56 1391.40 1392.45 1392.66 1394.95  
1395.24 1395.27 1395.74 1396.73 1399.16 1399.29  
1400.16 1401.13 1413.59 1415.31 1415.52 1417.44  
1420.86 1423.59 1435.03 1436.37 1437.16 1455.76  
1463.64 1474.96 1482.88 1484.70 1486.14 1487.42  
1487.67 1488.09 1489.67 1489.91 1493.25 1495.28  
1495.53 1497.03 1497.04 1498.71 1499.52 1500.89  
1502.09 1503.14 1503.76 1505.07 1505.61 1506.01  
1507.01 1507.82 1508.16 1508.40 1509.25 1509.64  
1509.95 1512.44 1513.25 1514.51 1516.62 1517.55  
1518.22 1518.99 1519.37 1520.35 1523.09 1525.13  
1527.72 1528.49 1530.89 1578.97 1597.08 1614.23  
1614.84 1619.59 1631.16 1659.89 2996.79 3005.39  
3008.66 3009.29 3009.48 3012.38 3012.59 3014.85  
3016.34 3019.23 3021.88 3023.27 3023.49 3027.37  
3028.99 3031.36 3033.69 3035.13 3035.59 3036.45  
3039.24 3041.54 3041.83 3049.71 3051.67 3061.16  
3062.99 3064.11 3064.70 3067.36 3070.22 3072.28  
3072.76 3074.78 3075.41 3075.83 3079.31 3081.51  
3082.20 3083.34 3083.75 3086.03 3086.21 3088.54  
3089.46 3090.75 3091.64 3095.81 3100.13 3102.65  
3102.73 3103.28 3103.54 3104.38 3104.72 3105.04  
3108.96 3111.24 3114.68 3115.31 3115.98 3116.08  
3118.84 3124.72 3124.83 3125.25 3128.66 3139.08  
3147.31 3158.87 3164.99 3166.88 3171.89 3179.20  
3181.23 3187.83 3188.85 3189.83 3195.45 3198.25  
3205.40 3439.71 3526.18

IF'

13.07 13.34 17.75 19.46 24.31 25.02  
27.21 29.99 33.94 35.79 38.79 39.18  
41.60 45.41 47.42 52.14 54.29 56.20  
59.42 62.22 63.88 68.78 69.52 71.07  
76.40 78.32 79.88 83.53 85.63 88.62  
93.43 95.46 99.78 101.07 101.53 106.25  
110.45 113.80 118.94 120.19 133.32 138.77  
140.92 144.88 146.45 150.86 152.88 161.65  
165.00 170.55 174.83 180.87 181.52 190.89  
194.96 200.87 209.27 210.82 213.75 215.09  
220.62 226.54 227.33 228.73 233.39 234.62  
238.87 239.07 245.74 248.03 252.38 252.56  
256.35 259.36 261.73 263.60 263.94 267.85  
270.09 270.98 274.19 281.69 284.22 285.09  
289.59 294.45 301.36 302.58 307.63 312.12  
318.08 320.55 330.68 333.37 335.75 340.87  
362.66 364.26 366.24 368.84 371.70 373.22  
379.25 380.71 386.88 391.84 406.64 412.42  
414.49 425.04 433.19 445.63 450.50 453.12

453.46 456.18 458.45 462.46 485.16 486.56  
489.63 494.74 496.32 497.64 498.72 501.98  
503.19 503.68 505.43 514.02 528.05 536.75  
546.48 556.84 563.54 568.78 590.08 608.96  
624.82 636.15 643.10 653.18 665.69 670.77  
673.17 709.35 714.59 728.15 748.18 749.98  
750.71 751.54 752.53 752.91 771.39 775.39  
790.91 799.71 808.17 810.64 823.34 823.83  
825.87 834.04 837.36 855.60 856.65 865.68  
867.38 868.29 882.25 888.48 890.65 890.90  
891.52 895.27 896.11 896.70 899.78 900.64  
902.90 904.81 909.53 910.37 912.05 913.78  
934.72 943.88 945.88 947.06 947.72 948.21  
948.55 954.05 955.86 960.96 964.39 973.06  
973.78 974.81 976.30 982.22 985.62 991.44  
997.17 998.10 1003.46 1004.66 1005.75 1009.00  
1019.43 1024.54 1028.43 1039.09 1040.94 1042.34  
1042.81 1043.44 1044.06 1045.67 1046.15 1048.00  
1055.11 1055.91 1057.28 1064.99 1086.25 1088.00  
1092.97 1094.13 1096.59 1100.15 1103.81 1105.69  
1109.41 1111.83 1125.41 1129.32 1131.76 1134.55  
1140.87 1145.86 1147.58 1162.18 1189.94 1190.51  
1190.59 1199.42 1203.51 1208.16 1210.85 1212.59  
1214.01 1217.94 1232.83 1233.06 1237.64 1238.46  
1238.94 1240.93 1242.44 1244.31 1245.24 1245.51  
1247.72 1250.23 1263.29 1281.68 1284.40 1289.79  
1292.08 1296.89 1300.87 1301.36 1305.39 1307.76  
1311.02 1312.51 1316.94 1324.14 1330.67 1342.83  
1349.81 1352.84 1353.25 1355.38 1360.95 1363.59  
1364.97 1369.37 1378.12 1379.96 1385.24 1386.63  
1387.78 1390.61 1392.13 1392.40 1394.46 1395.19  
1395.62 1396.09 1396.59 1397.84 1399.05 1400.77  
1401.81 1412.74 1414.98 1415.65 1417.39 1421.57  
1422.76 1433.52 1436.48 1437.11 1455.63 1464.19  
1475.13 1483.06 1484.65 1486.96 1487.58 1487.74  
1489.99 1491.61 1492.20 1493.60 1494.71 1495.99  
1497.19 1497.91 1498.59 1499.33 1500.46 1501.16  
1502.79 1503.43 1505.09 1505.53 1506.49 1506.95  
1507.06 1507.77 1508.14 1508.35 1509.47 1510.92  
1511.95 1513.01 1513.22 1514.04 1515.96 1517.55  
1518.14 1519.29 1520.43 1522.75 1524.95 1525.08  
1526.78 1527.57 1529.53 1530.27 1597.93 1613.11  
1615.16 1618.76 1622.80 1631.87 1649.43 1658.93  
2997.18 2997.65 3008.78 3009.60 3009.95 3013.17  
3013.89 3014.19 3014.62 3017.02 3020.72 3021.35  
3023.56 3029.15 3031.26 3032.34 3032.61 3035.31  
3035.54 3038.50 3039.23 3040.98 3042.65 3046.14  
3054.37 3058.18 3063.28 3065.18 3065.79 3067.99  
3070.81 3071.46 3073.28 3074.84 3076.16 3078.16  
3079.46 3079.77 3080.86 3081.50 3083.28 3083.49  
3085.83 3088.93 3090.11 3091.88 3093.17 3096.06  
3101.45 3101.86 3103.12 3103.16 3103.74 3104.56  
3107.77 3108.47 3109.27 3112.13 3114.06 3115.86  
3116.57 3117.07 3117.56 3120.02 3122.93 3124.26  
3125.88 3139.68 3141.20 3158.30 3158.85 3163.69  
3165.02 3165.61 3174.57 3175.98 3177.00 3179.34  
3185.03 3187.66 3189.28 3194.95 3195.82 3196.73  
3203.97 3206.68 3504.19

=====

1G

=====

17.59 27.17 35.12 38.80 43.05 46.00  
51.67 60.34 63.53 67.16 70.79 75.22  
78.81 85.55 88.44 95.69 98.15 103.61  
114.49 128.30 137.36 141.63 148.42 152.73  
158.01 172.78 175.31 181.73 191.07 198.26  
201.73 216.03 227.04 240.67 245.91 249.17  
253.95 261.78 264.14 266.41 268.89 270.58  
274.95 282.70 284.55 290.89 302.98 312.74  
330.55 335.43 341.22 363.06 380.41 383.99  
389.00 414.55 417.29 435.12 447.45 451.98  
452.84 466.21 474.74 486.43 490.45 499.81  
509.33 529.71 535.09 546.56 558.25 559.62  
590.06 608.06 625.30 641.84 653.43 667.01  
668.01 672.60 707.42 726.23 733.66 749.49  
753.04 754.87 775.12 781.72 787.81 799.80  
808.41 810.82 826.11 827.41 833.15 854.93  
856.82 867.07 869.18 896.59 900.60 902.61  
903.65 907.04 908.65 911.73 912.39 913.31  
934.48 941.31 945.79 946.95 948.91 955.66  
964.71 971.62 973.38 975.08 979.37 985.33  
990.29 1004.08 1008.92 1021.03 1023.85 1028.55  
1039.61 1046.33 1049.16 1059.27 1060.62 1064.40  
1082.91 1086.86 1094.20 1096.37 1100.49 1104.19  
1105.55 1109.18 1109.53 1126.66 1129.42 1131.52  
1135.59 1137.93 1146.44 1148.52 1163.22 1189.75  
1192.71 1203.32 1205.87 1208.85 1211.24 1216.85  
1218.75 1231.56 1242.41 1265.45 1283.94 1289.98  
1292.16 1297.87 1300.26 1305.00 1306.00 1307.36  
1309.38 1314.07 1314.32 1329.73 1333.63 1342.68  
1351.76 1352.68 1354.12 1359.77 1361.81 1364.42  
1369.60 1378.26 1382.34 1382.76 1390.48 1391.68  
1392.44 1396.07 1397.84 1401.38 1401.90 1412.74  
1415.77 1417.16 1434.88 1436.34 1437.28 1459.72  
1464.85 1475.55 1494.01 1494.44 1496.32 1498.15  
1498.97 1500.21 1500.46 1500.92 1502.39 1503.91  
1505.19 1506.46 1507.16 1507.68 1508.15 1511.11  
1517.74 1518.41 1520.53 1521.61 1522.68 1523.77  
1524.55 1525.40 1529.91 1572.77 1613.49 1613.93  
1618.72 1620.12 1643.82 1658.83 3011.76 3013.14  
3014.82 3019.25 3020.08 3023.40 3023.84 3029.65  
3033.48 3034.89 3035.64 3036.04 3037.04 3038.01  
3038.64 3040.59 3044.57 3058.40 3066.22 3069.14  
3069.44 3071.04 3071.22 3073.61 3076.12 3080.46  
3092.94 3100.65 3102.38 3102.61 3106.87 3108.68  
3109.02 3110.49 3116.03 3116.39 3119.52 3121.46  
3126.14 3130.47 3134.64 3146.03 3161.58 3165.37  
3166.22 3169.93 3179.38 3179.89 3181.13 3185.45  
3191.73 3194.17 3204.31 3223.83 3446.22 3533.41

=====

1G'

=====

12.35 23.17 28.05 33.35 36.68 42.00  
44.65 49.09 55.16 57.37 69.10 72.55  
73.65 78.25 80.75 86.32 89.14 93.22  
94.91 100.54 101.99 114.43 126.68 136.86

|         |         |         |         |         |         |
|---------|---------|---------|---------|---------|---------|
| 138.40  | 148.82  | 152.33  | 157.59  | 173.70  | 180.25  |
| 188.74  | 192.45  | 198.98  | 212.79  | 216.31  | 227.69  |
| 241.00  | 245.47  | 246.45  | 249.47  | 253.81  | 257.98  |
| 265.02  | 268.40  | 269.05  | 271.31  | 274.23  | 282.54  |
| 291.48  | 301.54  | 312.25  | 331.45  | 335.04  | 340.31  |
| 363.51  | 380.24  | 382.83  | 389.03  | 390.07  | 412.49  |
| 420.81  | 429.27  | 436.10  | 447.45  | 451.36  | 452.19  |
| 469.71  | 472.58  | 485.64  | 488.71  | 492.49  | 498.49  |
| 509.11  | 531.31  | 532.90  | 536.21  | 546.38  | 548.56  |
| 558.38  | 589.10  | 607.47  | 625.69  | 630.03  | 640.78  |
| 653.37  | 665.98  | 666.95  | 672.31  | 708.06  | 712.40  |
| 731.83  | 745.67  | 752.75  | 755.09  | 770.22  | 775.18  |
| 784.18  | 799.67  | 799.88  | 808.65  | 812.27  | 826.30  |
| 828.39  | 831.54  | 832.42  | 854.13  | 856.35  | 859.50  |
| 867.31  | 869.35  | 870.27  | 896.15  | 901.01  | 901.41  |
| 902.55  | 905.31  | 908.81  | 912.42  | 913.39  | 913.41  |
| 934.49  | 942.90  | 946.04  | 946.91  | 948.80  | 955.19  |
| 962.58  | 963.89  | 973.54  | 974.10  | 974.85  | 978.12  |
| 981.11  | 981.76  | 992.02  | 994.65  | 1003.28 | 1009.08 |
| 1019.04 | 1024.24 | 1029.23 | 1039.07 | 1043.31 | 1046.15 |
| 1049.69 | 1057.28 | 1060.31 | 1064.91 | 1082.95 | 1086.25 |
| 1092.73 | 1093.72 | 1097.02 | 1100.09 | 1104.04 | 1105.54 |
| 1109.44 | 1112.13 | 1126.30 | 1129.56 | 1131.27 | 1135.18 |
| 1140.58 | 1147.82 | 1148.85 | 1162.86 | 1175.07 | 1189.67 |
| 1191.77 | 1192.45 | 1201.00 | 1203.85 | 1205.55 | 1208.75 |
| 1211.20 | 1217.20 | 1218.58 | 1233.61 | 1243.77 | 1264.82 |
| 1284.06 | 1289.57 | 1291.71 | 1298.39 | 1299.98 | 1304.67 |
| 1306.47 | 1307.83 | 1311.03 | 1312.73 | 1316.04 | 1324.02 |
| 1330.21 | 1332.70 | 1342.92 | 1352.32 | 1352.87 | 1354.58 |
| 1355.05 | 1360.60 | 1361.31 | 1363.96 | 1370.29 | 1372.43 |
| 1377.77 | 1382.19 | 1385.11 | 1391.31 | 1392.81 | 1395.05 |
| 1396.59 | 1398.54 | 1401.61 | 1402.30 | 1413.63 | 1415.76 |
| 1417.13 | 1435.33 | 1436.23 | 1437.47 | 1459.72 | 1464.80 |
| 1475.68 | 1492.54 | 1494.93 | 1496.28 | 1496.89 | 1498.47 |
| 1499.00 | 1500.45 | 1500.82 | 1501.52 | 1503.84 | 1504.17 |
| 1505.55 | 1506.84 | 1507.22 | 1508.18 | 1508.72 | 1511.65 |
| 1514.18 | 1517.91 | 1518.43 | 1520.63 | 1521.82 | 1522.85 |
| 1523.83 | 1524.91 | 1525.77 | 1529.42 | 1598.48 | 1612.61 |
| 1613.69 | 1618.53 | 1620.05 | 1643.66 | 1645.48 | 1658.91 |
| 3011.39 | 3013.16 | 3014.02 | 3023.47 | 3029.71 | 3032.01 |
| 3033.97 | 3035.24 | 3035.39 | 3035.66 | 3036.71 | 3037.32 |
| 3038.53 | 3038.73 | 3040.32 | 3043.55 | 3043.85 | 3055.74 |
| 3066.01 | 3066.47 | 3067.08 | 3071.02 | 3071.43 | 3079.50 |
| 3080.26 | 3080.60 | 3097.39 | 3099.79 | 3102.37 | 3102.66 |
| 3104.62 | 3105.56 | 3108.86 | 3110.15 | 3115.61 | 3116.31 |
| 3118.59 | 3121.50 | 3126.01 | 3127.81 | 3131.18 | 3157.05 |
| 3157.63 | 3163.90 | 3165.03 | 3166.26 | 3169.67 | 3171.60 |
| 3176.08 | 3178.45 | 3180.36 | 3181.98 | 3182.08 | 3185.47 |
| 3190.84 | 3192.78 | 3202.67 | 3205.23 | 3210.23 | 3495.02 |

1H

|        |        |        |        |        |        |
|--------|--------|--------|--------|--------|--------|
| 22.18  | 32.19  | 39.03  | 44.40  | 48.38  | 49.97  |
| 55.18  | 58.96  | 64.49  | 66.46  | 73.46  | 78.21  |
| 83.67  | 85.75  | 90.78  | 93.77  | 95.11  | 100.06 |
| 112.55 | 124.96 | 139.93 | 140.68 | 147.98 | 150.44 |
| 164.98 | 169.80 | 178.18 | 182.99 | 185.18 | 195.44 |
| 211.62 | 217.01 | 224.94 | 232.12 | 236.85 | 248.38 |

|         |         |         |         |         |         |
|---------|---------|---------|---------|---------|---------|
| 253.94  | 255.12  | 257.16  | 267.29  | 268.96  | 274.14  |
| 277.25  | 278.44  | 283.81  | 289.80  | 298.19  | 316.24  |
| 331.98  | 335.26  | 341.69  | 362.02  | 381.64  | 383.61  |
| 398.14  | 412.87  | 421.94  | 432.76  | 450.65  | 451.98  |
| 452.07  | 457.44  | 480.12  | 485.27  | 489.84  | 499.81  |
| 511.26  | 519.55  | 524.63  | 538.59  | 544.03  | 563.63  |
| 589.40  | 608.99  | 626.13  | 639.27  | 648.95  | 660.04  |
| 670.29  | 678.72  | 715.96  | 731.56  | 745.42  | 748.29  |
| 753.47  | 771.23  | 779.49  | 786.34  | 787.36  | 809.19  |
| 817.99  | 827.55  | 829.07  | 834.57  | 845.52  | 857.75  |
| 860.41  | 869.23  | 872.59  | 895.12  | 901.69  | 901.92  |
| 905.16  | 907.30  | 909.92  | 910.52  | 911.29  | 914.99  |
| 941.43  | 945.26  | 945.97  | 947.51  | 951.79  | 959.82  |
| 965.33  | 973.19  | 974.42  | 974.91  | 975.45  | 979.52  |
| 989.90  | 1003.89 | 1009.08 | 1019.58 | 1026.80 | 1028.95 |
| 1041.34 | 1044.32 | 1049.01 | 1064.32 | 1064.94 | 1074.17 |
| 1086.41 | 1089.43 | 1094.96 | 1096.04 | 1098.59 | 1101.87 |
| 1104.68 | 1107.56 | 1113.69 | 1127.29 | 1128.21 | 1133.31 |
| 1138.50 | 1142.25 | 1151.30 | 1157.41 | 1164.08 | 1191.15 |
| 1192.25 | 1203.30 | 1203.96 | 1206.34 | 1211.84 | 1216.80 |
| 1218.95 | 1238.15 | 1249.09 | 1262.04 | 1288.67 | 1291.95 |
| 1298.52 | 1299.89 | 1301.11 | 1306.51 | 1307.13 | 1309.41 |
| 1310.49 | 1313.32 | 1320.48 | 1326.83 | 1336.60 | 1342.40 |
| 1347.51 | 1347.58 | 1348.64 | 1349.65 | 1360.61 | 1368.62 |
| 1370.08 | 1378.01 | 1382.96 | 1387.05 | 1390.31 | 1393.21 |
| 1395.25 | 1395.46 | 1398.95 | 1401.46 | 1403.09 | 1412.79 |
| 1414.13 | 1414.57 | 1431.90 | 1433.93 | 1434.46 | 1464.36 |
| 1468.14 | 1479.24 | 1491.98 | 1493.05 | 1495.06 | 1497.83 |
| 1499.89 | 1501.42 | 1501.56 | 1501.85 | 1503.86 | 1504.22 |
| 1505.08 | 1505.40 | 1506.56 | 1507.50 | 1508.80 | 1512.39 |
| 1514.32 | 1515.33 | 1516.06 | 1517.04 | 1520.99 | 1523.99 |
| 1525.27 | 1528.00 | 1529.15 | 1573.81 | 1605.80 | 1612.27 |
| 1615.67 | 1619.92 | 1642.16 | 1660.70 | 3008.99 | 3013.08 |
| 3014.90 | 3016.99 | 3020.67 | 3023.96 | 3026.03 | 3027.07 |
| 3028.25 | 3029.63 | 3033.57 | 3034.10 | 3034.84 | 3036.24 |
| 3039.48 | 3040.57 | 3043.16 | 3053.58 | 3064.94 | 3067.46 |
| 3068.35 | 3070.27 | 3072.98 | 3074.57 | 3075.38 | 3081.43 |
| 3085.87 | 3091.61 | 3095.30 | 3099.24 | 3101.47 | 3103.19 |
| 3104.67 | 3104.75 | 3109.42 | 3111.08 | 3113.21 | 3119.98 |
| 3124.00 | 3125.19 | 3131.85 | 3132.19 | 3139.57 | 3158.71 |
| 3164.28 | 3175.66 | 3178.34 | 3179.14 | 3183.25 | 3189.73 |
| 3190.44 | 3195.92 | 3201.64 | 3212.05 | 3420.13 | 3504.96 |

1H'

|        |        |        |        |        |        |
|--------|--------|--------|--------|--------|--------|
| 10.70  | 15.64  | 27.63  | 33.35  | 38.85  | 41.34  |
| 47.51  | 52.87  | 57.15  | 58.53  | 62.55  | 64.81  |
| 70.63  | 75.05  | 78.63  | 81.32  | 89.49  | 95.37  |
| 98.74  | 101.62 | 102.02 | 114.62 | 135.03 | 138.39 |
| 143.15 | 149.95 | 157.03 | 161.10 | 166.76 | 183.00 |
| 188.31 | 198.91 | 204.97 | 208.65 | 215.28 | 228.80 |
| 232.29 | 240.73 | 248.29 | 251.33 | 255.18 | 257.68 |
| 265.47 | 266.28 | 276.53 | 279.75 | 284.62 | 290.64 |
| 301.78 | 306.10 | 319.62 | 328.07 | 334.80 | 338.45 |
| 341.02 | 366.11 | 382.22 | 385.17 | 397.59 | 415.27 |
| 424.05 | 425.68 | 435.43 | 450.14 | 452.69 | 454.25 |
| 457.13 | 480.93 | 485.60 | 486.19 | 490.61 | 501.23 |
| 519.51 | 526.01 | 536.77 | 545.36 | 551.22 | 562.53 |



587.90 592.37 608.93 624.96 635.95 637.48  
648.47 659.02 670.06 679.37 704.66 712.21  
731.84 736.26 746.67 753.10 754.65 765.70  
772.29 777.36 786.53 811.17 819.21 826.98  
828.74 830.37 833.12 849.67 856.29 857.28  
870.05 872.96 874.35 894.96 900.80 901.64  
904.27 908.03 909.31 911.54 914.43 914.93  
941.69 944.09 946.26 947.17 947.64 949.52  
956.56 961.35 969.42 973.87 974.01 975.26  
976.17 980.02 990.95 1004.23 1004.67 1009.48  
1019.82 1026.92 1029.95 1040.64 1044.45 1047.88  
1052.38 1063.30 1065.95 1074.44 1084.52 1087.66  
1094.65 1097.25 1099.62 1100.90 1103.67 1105.02  
1106.58 1113.01 1127.26 1128.28 1132.86 1137.13  
1143.01 1152.68 1157.34 1163.64 1185.68 1190.88  
1190.91 1203.14 1203.57 1206.17 1206.95 1214.40  
1216.17 1217.50 1235.09 1244.23 1251.29 1260.75  
1286.62 1290.11 1295.66 1296.66 1301.74 1306.15  
1306.48 1308.71 1314.35 1315.57 1317.48 1319.31  
1325.83 1337.25 1341.65 1346.00 1349.20 1351.30  
1352.02 1362.70 1363.64 1368.33 1370.64 1377.27  
1383.22 1385.08 1385.55 1390.18 1393.75 1395.11  
1395.56 1399.12 1401.86 1403.61 1414.16 1415.20  
1416.68 1433.93 1435.12 1437.64 1465.48 1468.11  
1477.77 1489.97 1493.55 1497.81 1499.51 1500.26  
1501.03 1501.33 1502.05 1504.07 1504.83 1504.84  
1505.22 1506.48 1507.96 1508.43 1512.12 1512.72  
1513.32 1516.60 1516.83 1516.98 1522.05 1523.91  
1524.77 1527.37 1529.13 1532.42 1602.08 1612.07  
1617.56 1618.26 1620.96 1641.62 1650.64 1656.76  
3009.33 3013.77 3014.62 3017.46 3021.23 3022.57  
3025.39 3028.39 3031.67 3032.50 3033.75 3035.68  
3037.73 3038.19 3040.97 3042.08 3044.99 3046.01  
3062.71 3068.88 3069.17 3070.23 3072.54 3075.15  
3075.88 3087.00 3087.74 3091.65 3098.03 3099.43  
3101.45 3102.74 3105.55 3108.28 3109.71 3112.08  
3113.78 3118.23 3118.67 3121.82 3122.55 3144.66  
3151.92 3158.43 3160.13 3164.63 3167.02 3172.73  
3178.51 3179.95 3180.67 3185.70 3187.36 3190.07  
3195.22 3197.12 3201.70 3213.19 3255.78 3503.21

=====  
1H-TS  
=====

-435.66 14.58 20.66 38.00 41.54 44.59  
46.53 51.82 55.50 60.97 65.76 68.63  
76.73 81.78 82.62 84.71 92.88 96.64  
103.08 112.45 135.61 141.42 145.29 151.07  
154.03 166.16 175.79 184.52 185.04 199.63  
215.92 232.22 235.70 249.77 252.98 254.42  
254.68 256.74 259.06 267.09 273.50 276.43  
278.40 284.74 290.38 297.05 313.13 331.99  
334.66 340.65 360.95 380.05 381.83 394.99  
411.23 421.91 427.34 431.01 449.78 451.38  
452.74 457.48 459.59 464.43 483.55 489.70  
500.62 518.15 525.52 534.71 543.00 563.24  
590.21 608.02 620.61 626.59 641.82 645.35  
646.00 662.65 677.70 708.02 731.30 738.32  
748.34 752.07 770.72 781.43 787.64 808.74

813.96 818.12 826.82 829.93 834.74 845.21  
857.38 860.62 869.44 873.21 895.54 901.44  
902.16 904.76 908.21 909.79 911.66 911.77  
941.32 944.68 945.76 946.88 949.20 958.48  
958.73 965.40 972.83 974.16 974.50 974.80  
980.06 994.72 1002.82 1004.32 1020.44 1026.70  
1028.95 1044.14 1048.96 1051.75 1063.61 1064.29  
1073.65 1087.87 1095.25 1098.68 1099.87 1101.32  
1103.82 1107.05 1113.46 1127.34 1130.09 1132.65  
1136.73 1141.46 1150.55 1156.41 1163.79 1188.11  
1191.12 1203.28 1203.74 1205.74 1206.43 1215.89  
1218.81 1235.09 1247.67 1262.56 1287.25 1293.63  
1297.20 1298.51 1300.12 1303.66 1306.00 1308.81  
1312.09 1318.73 1319.91 1322.07 1334.37 1342.32  
1348.86 1349.83 1352.25 1355.83 1359.67 1367.89  
1369.56 1379.17 1381.21 1385.89 1390.15 1392.58  
1394.29 1394.93 1398.56 1400.41 1403.41 1412.39  
1413.32 1415.73 1431.55 1432.61 1435.30 1468.08  
1471.77 1476.55 1488.37 1492.11 1493.65 1495.36  
1497.72 1499.39 1500.68 1501.21 1501.68 1503.80  
1504.64 1504.98 1505.87 1506.94 1507.89 1512.39  
1514.43 1515.67 1516.77 1517.07 1520.56 1524.10  
1524.94 1525.43 1527.95 1554.84 1600.58 1611.35  
1611.87 1619.74 1642.56 1659.85 3007.64 3011.11  
3014.55 3016.29 3019.56 3022.64 3023.34 3025.27  
3027.38 3031.78 3032.14 3033.17 3034.15 3035.66  
3038.73 3038.86 3040.70 3050.68 3062.14 3064.87  
3066.58 3067.91 3071.49 3072.94 3075.70 3076.42  
3085.23 3086.56 3099.48 3100.65 3101.12 3101.61  
3101.95 3106.07 3109.43 3111.65 3113.06 3116.96  
3121.19 3121.88 3121.93 3125.53 3130.26 3157.76  
3162.53 3175.15 3176.72 3178.66 3184.01 3186.89  
3188.09 3200.04 3200.89 3212.59 3556.76 3670.61

=====  
1H'-TS  
=====

-373.87 14.88 20.58 24.03 33.58 35.98  
37.48 46.43 52.08 59.37 64.75 65.19  
73.08 77.44 78.02 81.54 84.37 88.97  
92.43 95.26 97.84 109.91 119.67 138.88  
142.91 143.56 150.49 152.05 165.02 170.40  
184.36 186.15 197.62 215.01 224.50 229.74  
234.35 240.77 245.66 251.58 252.80 256.58  
258.39 266.18 274.50 276.40 281.80 286.77  
289.64 290.54 298.80 314.53 331.93 336.02  
341.02 361.77 381.47 383.16 395.10 423.93  
424.63 429.09 432.11 449.44 450.93 452.20  
453.24 457.35 483.70 489.71 500.53 515.82  
518.82 525.53 535.07 541.97 549.11 561.92  
585.30 591.45 608.86 620.19 633.06 638.05  
641.06 646.46 664.42 678.79 699.35 708.92  
726.75 731.34 747.57 753.46 769.95 770.86  
782.45 784.70 786.79 808.35 818.26 826.00  
829.20 829.84 834.76 839.09 856.90 860.00  
866.28 869.27 872.88 893.38 895.35 901.70  
903.39 904.49 908.42 908.96 910.96 915.72  
941.81 944.30 944.95 946.49 947.49 957.66  
958.23 959.23 964.44 974.12 974.55 975.56

976.29 980.10 980.50 997.18 1001.66 1003.30  
 1010.41 1021.49 1026.12 1029.22 1043.60 1049.26  
 1052.86 1054.37 1063.39 1066.44 1072.80 1088.31  
 1094.32 1098.62 1101.57 1101.69 1103.63 1106.49  
 1110.58 1113.57 1127.88 1128.47 1133.39 1136.81  
 1141.08 1151.27 1157.35 1164.32 1188.29 1190.07  
 1190.67 1203.24 1203.52 1205.50 1207.71 1211.10  
 1215.61 1218.14 1232.59 1248.58 1258.02 1262.64  
 1287.03 1292.73 1296.84 1298.20 1300.50 1303.44  
 1305.47 1306.31 1308.35 1312.63 1319.57 1321.09  
 1324.01 1334.87 1341.43 1344.95 1350.66 1351.42  
 1354.09 1362.78 1365.99 1367.81 1369.51 1379.68  
 1380.85 1385.93 1389.06 1391.39 1392.70 1394.42  
 1395.17 1398.42 1400.56 1402.79 1413.05 1413.69  
 1415.72 1432.71 1433.02 1436.22 1467.92 1469.29  
 1475.85 1490.70 1493.19 1494.33 1496.97 1498.33  
 1499.40 1500.97 1501.48 1502.09 1503.51 1504.56  
 1504.99 1505.32 1507.13 1508.47 1509.14 1511.94  
 1515.41 1516.24 1516.71 1517.54 1520.74 1524.75  
 1525.62 1526.09 1527.74 1534.27 1601.27 1612.08  
 1612.24 1615.43 1630.98 1643.42 1655.43 1659.93  
 3008.11 3012.22 3013.59 3014.98 3017.07 3019.89  
 3023.53 3029.02 3029.57 3030.51 3030.89 3033.20  
 3034.70 3037.76 3039.56 3040.61 3040.83 3048.24  
 3065.00 3065.63 3067.24 3068.78 3073.36 3074.04  
 3077.26 3082.94 3084.34 3088.87 3098.33 3099.58  
 3100.71 3101.71 3105.27 3105.34 3109.20 3111.19  
 3112.02 3118.56 3119.76 3122.18 3132.16 3149.91  
 3153.06 3158.49 3160.42 3165.27 3168.37 3174.40  
 3177.12 3177.70 3180.36 3187.91 3192.35 3198.41  
 3198.66 3200.62 3206.75 3213.29 3226.77 3581.95

II

14.15 25.37 31.86 33.93 36.72 43.05  
 49.84 50.90 52.95 60.95 64.61 68.11  
 73.63 74.65 77.23 83.22 86.69 91.27  
 99.44 102.61 121.41 135.97 146.49 152.93  
 156.29 165.29 171.90 185.59 196.75 206.86  
 215.27 223.12 242.93 254.84 256.42 257.98  
 261.16 262.84 266.43 282.07 290.87 292.66  
 297.72 300.55 322.08 326.22 333.59 337.78  
 339.51 369.82 379.43 384.92 391.67 396.38  
 417.71 419.29 439.03 448.80 451.16 453.72  
 457.02 483.27 492.40 497.61 510.51 519.18  
 528.45 532.82 535.77 544.27 555.74 564.69  
 590.09 611.22 634.86 640.28 652.03 666.05  
 676.78 704.30 726.43 748.68 752.93 762.43  
 766.09 783.31 785.88 806.62 810.90 822.14  
 822.61 827.66 834.75 839.49 856.90 868.17  
 870.92 893.59 894.36 896.36 898.36 901.30  
 903.16 906.23 911.10 913.73 938.80 940.52  
 942.33 947.15 947.92 949.20 956.10 960.75  
 963.09 971.65 974.02 975.57 976.35 986.46  
 995.55 1015.36 1020.10 1021.56 1029.16 1046.75  
 1049.95 1056.93 1059.92 1062.55 1066.89 1085.73  
 1093.98 1096.15 1099.05 1100.67 1102.83 1107.70  
 1109.32 1129.24 1130.79 1131.32 1133.17 1135.34

1145.64 1152.65 1159.15 1162.66 1191.65 1194.15  
 1201.12 1203.86 1206.90 1211.34 1213.56 1217.00  
 1224.64 1238.22 1258.10 1273.18 1283.07 1290.55  
 1293.62 1295.76 1300.41 1301.89 1304.94 1306.47  
 1308.87 1318.09 1323.85 1339.55 1340.73 1352.09  
 1352.76 1357.87 1362.24 1367.59 1367.73 1369.36  
 1373.47 1378.72 1379.25 1380.22 1387.66 1389.86  
 1392.68 1394.07 1398.40 1401.06 1402.67 1409.21  
 1413.44 1417.53 1430.32 1433.24 1437.15 1463.86  
 1473.42 1492.71 1496.49 1497.11 1499.12 1499.75  
 1501.44 1501.96 1502.28 1503.62 1504.01 1505.45  
 1506.13 1508.23 1508.82 1510.09 1513.15 1514.48  
 1516.43 1516.92 1519.76 1521.38 1522.19 1527.47  
 1527.90 1531.31 1542.33 1609.90 1610.79 1641.26  
 1649.97 1652.77 1658.26 1667.60 2997.40 3009.86  
 3010.15 3010.66 3012.23 3014.02 3016.49 3016.77  
 3024.12 3025.93 3027.22 3027.45 3032.72 3033.38  
 3034.58 3036.73 3038.30 3038.75 3057.86 3062.11  
 3064.00 3065.04 3068.77 3069.13 3076.29 3080.98  
 3084.37 3087.38 3088.41 3095.62 3096.82 3097.36  
 3100.65 3103.69 3107.72 3108.09 3109.03 3111.03  
 3115.37 3116.18 3116.98 3119.57 3124.97 3163.75  
 3167.15 3170.65 3172.73 3177.66 3181.49 3187.71  
 3191.06 3201.61 3202.90 3207.70 3468.24 3585.62

II'

15.13 19.61 28.04 29.65 36.20 39.81  
 45.87 48.15 53.14 54.85 58.61 62.34  
 63.93 67.96 71.78 73.28 76.83 79.94  
 85.42 88.66 95.96 100.81 108.42 123.10  
 139.87 145.20 148.79 155.50 165.42 167.19  
 182.85 196.69 205.17 214.17 221.16 224.61  
 241.75 252.36 254.63 257.13 257.19 259.14  
 265.15 267.17 280.13 289.69 293.65 296.26  
 305.81 315.59 329.34 332.35 338.24 338.80  
 366.52 376.93 388.82 391.37 418.71 418.88  
 421.87 440.64 448.79 450.75 452.42 455.50  
 457.86 482.46 491.15 492.50 496.62 510.49  
 527.89 532.23 534.71 537.83 563.71 578.87  
 588.70 610.64 625.85 633.16 640.57 641.97  
 646.94 661.79 677.03 706.08 708.85 726.42  
 748.23 752.74 759.89 761.95 766.93 779.90  
 785.74 806.49 810.48 810.68 821.64 826.90  
 834.69 843.24 849.41 856.09 867.80 870.62  
 875.82 893.58 894.50 897.34 897.53 901.35  
 902.98 905.83 909.97 910.13 922.23 936.27  
 938.75 941.65 943.61 944.59 949.22 955.49  
 962.51 964.68 967.89 971.69 974.00 976.18  
 976.99 987.15 994.01 995.81 1014.37 1018.47  
 1020.79 1021.34 1029.15 1046.42 1049.55 1056.92  
 1058.15 1059.79 1061.49 1066.05 1085.76 1093.37  
 1097.76 1099.40 1102.50 1107.39 1108.72 1110.61  
 1123.29 1129.00 1130.57 1131.30 1133.56 1136.04  
 1145.48 1152.29 1161.46 1188.54 1194.72 1195.13  
 1200.91 1203.37 1206.44 1208.65 1211.10 1216.31  
 1218.40 1223.36 1228.62 1237.48 1259.09 1268.96  
 1283.45 1290.36 1292.84 1294.39 1295.52 1304.15

1305.83 1306.17 1308.29 1313.31 1317.47 1324.06  
 1338.39 1340.58 1350.30 1352.43 1353.48 1361.24  
 1362.36 1362.80 1367.13 1369.02 1371.34 1378.44  
 1379.20 1380.83 1387.09 1389.48 1392.28 1393.61  
 1398.20 1400.89 1402.14 1412.15 1412.86 1417.30  
 1431.68 1432.72 1438.96 1445.81 1464.55 1473.59  
 1492.99 1495.41 1496.88 1499.22 1499.40 1499.66  
 1500.93 1501.97 1502.05 1503.28 1503.89 1505.27  
 1505.45 1506.36 1509.26 1510.07 1514.64 1516.15  
 1517.16 1519.28 1521.63 1522.16 1524.46 1525.63  
 1529.73 1536.07 1538.96 1541.21 1608.73 1609.21  
 1640.41 1645.45 1652.70 1653.56 1655.50 1665.77  
 2996.71 3005.46 3009.44 3010.55 3011.75 3012.37  
 3016.17 3016.78 3018.42 3025.58 3026.04 3031.08  
 3032.13 3033.83 3036.95 3038.12 3041.76 3041.89  
 3056.63 3062.53 3063.87 3064.58 3067.68 3069.15  
 3073.11 3082.40 3083.24 3088.53 3092.81 3094.77  
 3097.14 3098.95 3104.12 3107.22 3109.19 3110.06  
 3110.29 3112.09 3114.42 3115.75 3116.23 3118.78  
 3128.04 3169.33 3172.46 3175.01 3175.13 3176.10  
 3178.84 3182.86 3183.47 3188.15 3192.91 3201.20  
 3201.30 3201.90 3209.05 3211.18 3219.36 3465.58

IJ

18.07 24.67 33.67 37.47 44.63 48.35  
 54.45 58.26 60.74 70.62 70.83 73.08  
 80.65 86.30 91.82 96.13 107.74 113.26  
 117.03 120.75 126.85 145.59 153.49 162.40  
 172.03 176.33 184.35 191.72 198.57 208.59  
 212.22 216.82 229.23 239.19 242.28 247.05  
 249.06 254.27 265.89 268.91 276.55 279.98  
 284.62 297.40 302.72 309.25 315.89 327.94  
 334.95 340.00 347.04 363.94 382.53 399.09  
 402.25 417.87 424.13 432.71 450.00 453.90  
 455.91 458.78 483.81 487.72 493.00 502.38  
 521.33 527.21 540.08 550.48 556.69 590.95  
 605.50 620.93 643.43 651.08 667.55 674.31  
 677.12 703.64 735.89 744.62 751.28 754.44  
 768.46 780.56 796.36 813.64 817.07 821.87  
 828.24 833.42 845.86 857.02 867.16 871.07  
 894.80 900.00 903.91 904.36 908.67 910.67  
 911.49 914.63 919.16 942.24 946.19 947.18  
 948.25 949.36 956.45 960.28 973.20 974.42  
 975.75 976.72 979.99 993.29 1005.64 1008.40  
 1019.49 1024.48 1027.45 1039.97 1045.40 1047.29  
 1057.61 1065.01 1072.51 1080.86 1087.21 1092.83  
 1095.54 1096.88 1101.93 1106.56 1107.05 1120.56  
 1121.45 1128.90 1130.12 1134.81 1143.81 1148.83  
 1153.57 1164.86 1190.22 1191.28 1203.18 1205.57  
 1207.44 1208.35 1217.87 1218.82 1236.64 1246.93  
 1261.09 1285.61 1291.82 1294.85 1297.07 1299.07  
 1303.74 1307.24 1310.67 1315.01 1317.53 1323.38  
 1327.64 1329.64 1339.76 1344.07 1345.26 1347.45  
 1350.86 1359.34 1366.74 1369.10 1372.85 1378.15  
 1390.31 1390.55 1394.83 1395.72 1398.16 1399.79  
 1400.49 1407.83 1416.00 1417.44 1418.41 1437.32  
 1438.87 1441.93 1459.85 1462.93 1474.77 1492.01

1496.04 1498.75 1499.23 1500.17 1500.71 1501.60  
 1502.51 1503.08 1504.68 1505.39 1506.45 1507.10  
 1508.78 1510.97 1512.69 1517.51 1518.20 1518.86  
 1519.85 1523.87 1524.80 1527.02 1528.75 1529.05  
 1606.40 1611.17 1612.78 1617.02 1640.36 1656.81  
 3004.07 3007.26 3016.45 3020.36 3024.20 3028.24  
 3032.72 3033.16 3036.67 3036.85 3037.16 3037.59  
 3040.34 3040.50 3041.01 3042.95 3045.33 3054.28  
 3065.20 3067.89 3070.43 3071.43 3073.00 3073.28  
 3080.22 3081.10 3088.66 3091.52 3098.44 3100.81  
 3104.24 3106.76 3110.85 3112.36 3114.13 3116.20  
 3116.39 3118.27 3130.00 3143.27 3143.49 3152.61  
 3153.64 3166.00 3172.59 3174.56 3183.90 3185.02  
 3198.15 3200.38 3210.82 3211.95 3226.70 3270.88

1K

19.31 26.62 32.02 35.99 36.60 40.40  
 48.23 51.75 58.33 58.97 68.30 70.00  
 73.18 77.48 80.11 89.93 94.43 96.59  
 101.45 107.04 111.39 114.73 117.38 130.66  
 140.67 142.94 148.79 154.55 160.18 162.62  
 181.88 188.64 191.76 196.74 202.15 216.98  
 227.05 228.75 235.59 237.64 245.97 249.59  
 252.67 255.75 266.41 269.03 274.87 277.44  
 281.22 287.73 291.93 294.48 295.47 304.14  
 311.20 312.56 333.13 337.13 345.83 365.06  
 380.33 384.34 392.89 415.03 424.98 431.54  
 440.35 447.85 450.39 453.12 464.06 475.69  
 484.89 487.05 496.90 500.28 502.80 511.57  
 532.75 537.40 548.02 559.85 588.52 608.17  
 617.72 628.21 641.52 653.60 665.75 666.05  
 671.61 719.50 728.35 750.28 754.45 755.45  
 774.47 787.33 798.11 809.94 814.08 823.34  
 829.42 832.54 842.83 857.24 863.24 866.06  
 868.28 868.34 886.53 896.16 899.72 901.06  
 903.18 904.66 906.03 907.78 914.60 915.77  
 923.08 934.72 944.67 946.66 947.81 948.37  
 956.07 964.33 973.63 975.51 978.12 981.53  
 987.35 997.34 1004.55 1011.29 1019.20 1022.02  
 1024.23 1030.76 1038.71 1043.51 1049.64 1050.19  
 1058.74 1063.55 1066.70 1083.67 1086.63 1091.39  
 1096.64 1101.06 1101.52 1101.97 1105.19 1109.76  
 1117.29 1119.60 1126.25 1129.39 1131.43 1135.99  
 1143.51 1144.27 1148.43 1151.14 1152.87 1164.01  
 1190.52 1192.86 1204.08 1204.80 1205.33 1212.01  
 1219.10 1221.73 1238.70 1247.84 1248.12 1265.17  
 1284.95 1286.90 1290.17 1294.00 1298.66 1300.83  
 1302.81 1304.15 1307.83 1309.03 1309.45 1322.29  
 1323.92 1328.28 1332.01 1341.32 1344.33 1352.80  
 1353.96 1355.71 1358.76 1361.77 1363.01 1365.37  
 1370.29 1376.85 1381.81 1386.92 1389.73 1393.17  
 1394.77 1399.13 1400.70 1401.64 1405.54 1406.27  
 1411.67 1413.36 1415.75 1417.02 1435.24 1436.34  
 1436.50 1437.44 1458.97 1462.24 1475.92 1490.51  
 1493.09 1496.30 1496.54 1497.32 1498.75 1500.35  
 1500.99 1501.52 1502.96 1504.63 1505.38 1506.89  
 1507.30 1508.21 1509.03 1511.56 1512.09 1513.57

1513.75 1518.35 1519.44 1522.33 1522.75 1524.24  
1525.12 1525.99 1529.45 1531.54 1610.50 1613.91  
1614.34 1620.29 1641.76 1659.66 2989.94 3004.51  
3011.24 3016.60 3020.84 3024.45 3029.15 3029.55  
3031.04 3035.16 3035.26 3035.90 3037.46 3038.75  
3039.54 3042.04 3045.79 3047.46 3048.20 3054.89  
3058.51 3063.98 3068.42 3070.27 3072.36 3075.20  
3077.57 3078.92 3082.52 3083.16 3090.86 3096.43  
3103.53 3104.51 3104.61 3108.09 3109.60 3113.39  
3115.37 3116.72 3117.88 3118.40 3119.95 3120.07  
3125.07 3130.80 3136.89 3143.62 3148.52 3151.36  
3163.44 3168.82 3171.48 3180.01 3182.14 3182.67  
3184.50 3186.56 3193.55 3195.70 3206.31 3207.73

2

24.98 31.47 37.95 39.30 44.45 48.15  
57.70 60.62 66.33 73.95 76.16 77.50  
85.35 92.95 98.83 101.44 106.35 110.62  
112.49 123.04 126.65 138.23 138.48 144.51  
148.23 154.14 156.97 164.90 167.10 172.30  
180.50 189.10 194.90 215.36 223.79 232.49  
237.30 240.65 241.68 245.57 251.28 258.67  
261.46 263.48 268.08 269.27 277.56 280.40  
286.52 292.81 293.90 297.39 298.08 310.79  
324.14 329.15 348.68 351.54 354.73 370.11  
378.89 382.19 385.67 389.01 407.16 408.67  
410.58 434.87 446.63 451.60 457.94 466.39  
474.67 480.46 486.00 506.29 528.31 549.85  
582.59 593.31 608.03 611.92 622.72 627.70  
633.87 649.73 650.27 664.50 672.02 681.82  
713.93 728.04 744.19 782.88 784.36 806.04  
808.66 830.28 854.61 881.23 894.47 896.22  
903.15 904.13 915.31 931.33 939.11 945.38  
946.36 948.14 950.33 954.78 957.87 963.97  
968.59 973.22 974.59 975.04 980.87 984.29  
985.44 987.55 1011.85 1038.56 1041.68 1043.28  
1044.33 1049.83 1060.60 1066.12 1072.41 1082.55  
1085.47 1086.94 1104.57 1107.60 1116.56 1119.49  
1123.12 1128.66 1130.46 1132.26 1138.69 1173.28  
1185.51 1189.32 1191.72 1193.47 1197.93 1199.48  
1201.57 1209.32 1223.38 1248.69 1270.24 1279.26  
1285.50 1290.08 1293.63 1296.86 1309.38 1316.64  
1341.22 1349.20 1349.66 1355.28 1357.69 1358.32  
1359.85 1375.09 1398.99 1412.61 1413.46 1414.68  
1415.16 1416.55 1418.34 1418.86 1422.03 1430.33  
1431.32 1433.65 1434.51 1436.12 1436.98 1441.83  
1449.08 1471.00 1485.33 1486.59 1488.68 1494.03  
1495.37 1495.92 1496.48 1498.90 1499.87 1502.00  
1503.43 1504.57 1505.29 1505.90 1506.89 1507.17  
1508.09 1512.01 1514.95 1515.39 1517.58 1518.16  
1518.79 1519.68 1521.86 1524.19 1526.82 1527.05  
1530.36 1530.98 1532.64 1569.79 1591.18 1601.64  
1607.09 1615.78 1653.78 3010.25 3029.61 3030.41  
3030.76 3031.83 3032.48 3033.43 3034.62 3035.27  
3036.67 3037.37 3037.66 3040.15 3041.27 3046.87  
3051.12 3071.12 3077.95 3080.83 3083.23 3089.16  
3091.35 3096.84 3097.06 3101.42 3105.15 3105.31

3107.01 3108.78 3109.90 3113.03 3115.11 3117.34  
3119.66 3122.81 3128.85 3132.59 3132.92 3133.21  
3134.95 3135.58 3141.34 3144.84 3149.83 3161.42  
3173.87 3175.11 3175.91 3184.58 3188.15 3189.31  
3199.46 3211.25 3238.39

2-TS

-170.94 13.78 28.47 29.96 35.22 42.52  
46.30 54.85 59.32 62.59 68.11 73.85  
78.34 84.54 93.42 98.51 100.77 109.47  
112.22 115.39 120.59 130.24 134.96 138.38  
144.32 147.85 153.69 159.49 162.80 173.11  
178.21 184.05 193.15 203.73 219.84 231.58  
234.16 237.14 244.85 249.98 250.52 251.87  
252.99 257.66 265.05 269.54 273.19 274.32  
280.80 288.69 290.38 295.58 298.55 306.72  
311.11 320.38 332.96 350.01 356.74 358.30  
369.94 380.04 383.71 392.44 407.94 411.30  
426.99 429.28 431.94 450.67 453.58 465.73  
475.83 481.85 486.93 513.36 533.37 556.41  
586.44 593.81 616.13 616.74 623.17 626.86  
630.51 637.34 650.70 651.93 672.35 690.16  
720.26 736.51 749.25 782.36 788.24 811.01  
831.10 833.86 858.50 882.02 896.18 897.27  
902.39 905.24 916.76 938.16 945.75 946.19  
946.96 951.69 954.50 961.02 962.74 965.83  
973.26 974.56 975.01 978.55 982.48 985.70  
987.30 989.23 1003.39 1038.68 1042.67 1045.18  
1048.83 1050.64 1058.86 1068.07 1071.92 1082.79  
1087.52 1101.33 1105.84 1110.58 1118.19 1122.84  
1126.37 1128.50 1130.42 1132.70 1140.69 1177.02  
1185.17 1189.70 1191.14 1194.29 1198.22 1202.23  
1204.57 1209.40 1223.84 1248.24 1271.20 1280.05  
1286.27 1288.79 1294.52 1297.01 1320.32 1325.23  
1341.69 1350.64 1350.84 1352.17 1355.74 1359.33  
1359.96 1376.11 1399.68 1411.64 1412.63 1415.35  
1416.17 1416.28 1418.69 1420.21 1423.87 1430.34  
1431.20 1432.50 1435.55 1435.97 1436.23 1442.51  
1473.07 1474.47 1486.33 1489.19 1490.05 1495.28  
1496.56 1497.47 1499.22 1500.17 1500.51 1501.98  
1502.28 1504.17 1505.13 1506.15 1506.75 1507.72  
1508.81 1511.69 1514.82 1515.52 1517.48 1518.02  
1518.93 1520.17 1520.90 1524.54 1525.79 1527.13  
1528.61 1529.95 1531.39 1593.44 1605.21 1607.29  
1607.78 1615.53 1655.27 3010.58 3025.90 3028.01  
3029.95 3033.34 3033.60 3034.72 3035.25 3036.50  
3036.82 3038.17 3039.37 3039.93 3040.92 3046.97  
3048.51 3071.36 3080.15 3081.36 3090.71 3092.02  
3097.82 3099.49 3099.61 3101.86 3103.15 3105.93  
3108.25 3109.23 3109.88 3113.77 3113.93 3114.30  
3119.16 3122.72 3129.19 3129.56 3133.11 3133.88  
3134.06 3141.98 3144.56 3154.21 3158.88 3159.91  
3169.82 3171.02 3176.43 3177.04 3182.93 3195.23  
3199.26 3213.09 3218.85

2A

20.35 23.61 33.04 38.13 46.42 52.52  
56.90 63.09 74.32 75.25 77.84 87.12  
96.13 100.74 104.20 106.04 107.81 115.35  
121.94 129.23 137.23 138.54 144.84 150.52  
157.48 159.95 162.26 165.58 178.22 182.42  
183.56 193.21 204.60 210.46 222.94 228.10  
229.42 236.56 243.45 246.18 248.23 251.42  
255.05 258.79 262.25 264.93 270.53 272.54  
274.88 280.07 283.61 293.43 304.63 308.32  
313.38 322.27 329.46 347.95 355.25 362.68  
369.62 380.91 384.76 395.23 405.89 411.73  
416.85 427.80 452.14 459.17 464.93 473.95  
480.84 483.62 490.98 517.99 534.75 555.20  
584.35 594.29 616.24 624.03 625.85 630.52  
637.98 653.03 656.22 669.67 674.24 709.29  
722.84 747.11 750.72 782.99 789.42 811.87  
832.61 847.33 858.43 894.67 895.46 903.53  
908.92 913.34 920.95 939.16 944.55 946.28  
948.35 948.61 960.92 962.30 964.34 969.93  
975.05 975.60 976.40 985.73 986.97 989.74  
990.20 1009.87 1038.19 1041.76 1042.51 1045.70  
1054.90 1059.72 1068.65 1071.56 1081.04 1087.70  
1090.48 1100.86 1107.44 1118.85 1119.71 1124.57  
1127.49 1129.20 1131.97 1133.37 1142.56 1174.77  
1184.56 1191.23 1191.67 1195.49 1201.19 1202.07  
1209.93 1211.42 1224.29 1252.81 1281.98 1283.61  
1285.18 1294.97 1300.38 1308.37 1318.52 1328.75  
1342.56 1343.22 1346.16 1349.09 1350.89 1360.42  
1363.17 1377.41 1402.20 1413.19 1414.20 1415.75  
1418.44 1419.21 1420.35 1424.08 1426.85 1432.93  
1433.40 1434.60 1435.56 1438.82 1440.05 1446.96  
1467.37 1476.64 1485.24 1488.03 1491.92 1494.94  
1498.24 1499.01 1499.79 1500.59 1502.37 1503.04  
1503.48 1504.86 1505.49 1505.68 1506.76 1509.24  
1509.39 1511.68 1515.27 1516.14 1516.74 1517.69  
1519.01 1521.14 1521.63 1524.04 1526.01 1527.02  
1527.32 1529.58 1534.36 1593.93 1595.52 1609.20  
1620.32 1625.47 1656.42 3012.15 3030.80 3034.34  
3034.87 3037.50 3037.65 3040.22 3040.43 3041.55  
3041.90 3042.66 3042.92 3044.77 3045.53 3048.20  
3054.46 3073.09 3088.49 3090.88 3093.10 3095.00  
3099.32 3101.90 3105.69 3106.79 3108.62 3108.86  
3111.42 3112.25 3114.83 3118.03 3120.26 3121.18  
3124.42 3128.52 3130.05 3135.77 3137.38 3137.64  
3146.27 3159.63 3160.15 3161.52 3163.16 3164.46  
3172.70 3181.06 3182.55 3189.54 3192.71 3195.56  
3200.26 3208.64 3219.35

2B

15.82 25.07 34.28 37.77 44.17 46.91  
57.54 61.36 67.86 71.83 76.37 80.52  
86.21 93.55 96.73 103.08 106.67 110.74  
114.55 126.25 135.92 142.02 147.76 149.50  
153.43 161.23 163.50 176.98 179.88 185.64  
189.79 194.06 201.28 207.20 219.22 222.20  
229.89 235.69 240.09 242.48 244.71 250.04  
251.29 253.87 258.89 260.01 267.49 271.98

279.78 281.88 289.75 299.73 307.65 309.59  
321.60 332.53 343.85 349.87 362.08 374.59  
377.19 388.70 392.95 401.30 407.87 415.63  
424.13 434.51 452.81 461.03 475.84 483.07  
486.54 489.23 501.27 517.14 536.06 553.94  
584.21 597.37 601.83 612.80 623.05 627.30  
648.67 656.49 660.52 667.86 675.44 708.84  
716.83 744.78 749.42 783.30 795.27 821.90  
831.10 851.79 857.91 891.74 895.98 901.25  
905.25 919.32 919.66 935.24 944.22 947.02  
948.49 949.85 959.96 960.38 962.61 971.43  
973.87 974.10 976.65 977.66 981.37 986.96  
995.11 1006.37 1035.08 1035.72 1039.20 1044.39  
1047.85 1060.46 1064.75 1072.43 1077.82 1082.11  
1088.08 1102.69 1104.08 1109.56 1117.29 1123.35  
1126.35 1127.44 1129.31 1131.70 1141.57 1178.30  
1179.37 1185.81 1191.80 1193.40 1202.76 1203.63  
1208.05 1221.66 1224.29 1247.01 1275.49 1279.12  
1281.60 1285.65 1289.65 1296.33 1306.52 1309.60  
1325.64 1336.89 1352.68 1354.63 1356.00 1359.06  
1360.34 1377.53 1400.09 1405.38 1412.01 1414.56  
1415.32 1417.51 1418.63 1420.14 1420.60 1433.63  
1434.61 1436.54 1436.72 1438.37 1438.60 1447.31  
1461.39 1475.26 1480.42 1487.83 1491.55 1492.66  
1496.45 1498.11 1499.43 1501.03 1501.40 1501.54  
1503.39 1505.18 1506.03 1507.51 1507.52 1508.33  
1510.35 1511.01 1514.50 1518.57 1519.19 1519.74  
1522.01 1522.85 1525.28 1526.03 1526.63 1527.61  
1532.22 1533.38 1541.00 1585.31 1602.65 1608.65  
1614.05 1618.94 1656.91 3009.19 3028.34 3033.15  
3034.42 3037.11 3038.67 3039.06 3039.64 3041.40  
3042.20 3043.41 3043.89 3049.01 3050.08 3060.69  
3063.05 3070.84 3075.25 3086.14 3088.97 3091.69  
3103.60 3104.50 3105.87 3109.76 3110.54 3112.65  
3113.14 3113.30 3117.17 3120.17 3121.16 3125.52  
3128.30 3130.21 3138.36 3142.30 3152.06 3155.01  
3160.16 3161.10 3163.88 3164.75 3170.63 3174.38  
3180.23 3183.78 3190.74 3196.29 3198.09 3209.82  
3211.05 3218.25 3224.20

2C

15.87 26.01 33.47 37.62 44.04 50.80  
55.84 61.49 64.24 66.64 69.71 77.25  
79.50 88.37 90.39 91.68 99.34 104.92  
108.92 112.55 122.30 128.58 139.12 142.17  
144.98 148.76 152.93 159.03 162.61 173.91  
180.32 182.11 187.02 189.23 195.77 202.52  
204.13 214.93 222.74 224.38 230.28 238.06  
242.29 243.58 246.50 249.76 250.71 254.69  
258.42 266.18 269.30 273.19 278.43 281.81  
289.66 292.46 299.39 308.20 320.77 332.97  
342.63 350.27 361.59 374.01 377.04 388.11  
392.30 397.09 405.60 416.17 421.67 434.08  
452.18 457.97 475.03 482.19 486.35 495.41  
502.82 516.41 534.92 553.58 584.19 599.36  
600.29 604.02 613.11 626.42 627.77 649.95  
655.39 658.60 661.75 665.63 674.92 716.01

719.58 743.63 751.01 783.75 794.91 820.98  
831.16 857.73 860.18 891.95 895.74 900.97  
903.97 917.75 917.92 933.20 944.61 946.54  
948.32 949.02 959.00 959.80 962.66 970.02  
973.66 974.57 975.96 977.26 981.06 987.75  
994.75 1005.93 1031.28 1035.50 1039.28 1044.75  
1049.63 1061.95 1065.53 1072.20 1080.68 1085.08  
1087.95 1102.64 1103.56 1106.85 1115.63 1123.11  
1126.51 1127.64 1129.47 1132.34 1140.80 1153.52  
1177.98 1180.81 1186.31 1191.54 1193.23 1202.16  
1204.04 1208.50 1222.78 1224.19 1246.91 1275.88  
1281.04 1281.94 1288.20 1292.06 1295.12 1308.55  
1309.18 1325.82 1343.86 1352.57 1357.36 1357.90  
1359.14 1361.53 1376.66 1399.02 1405.46 1411.64  
1414.25 1416.49 1416.88 1417.99 1419.52 1419.76  
1433.70 1434.55 1435.53 1436.13 1437.21 1437.72  
1445.55 1463.43 1474.95 1480.83 1488.22 1490.79  
1492.77 1494.80 1497.86 1499.65 1500.50 1500.78  
1501.36 1503.08 1505.09 1505.67 1506.68 1507.32  
1508.56 1510.30 1511.66 1514.06 1518.19 1518.66  
1519.34 1522.16 1523.43 1525.31 1525.39 1526.30  
1527.74 1532.73 1533.21 1542.06 1588.61 1605.88  
1609.69 1616.35 1624.10 1640.36 1657.61 1666.09  
3008.78 3027.51 3034.15 3035.43 3037.31 3038.29  
3038.40 3038.65 3039.41 3041.37 3042.58 3042.99  
3044.22 3046.14 3058.80 3069.68 3074.57 3081.42  
3083.38 3084.57 3090.17 3102.25 3103.48 3105.86  
3106.72 3109.44 3111.27 3113.58 3114.16 3116.69  
3117.04 3120.42 3121.23 3129.39 3132.83 3135.08  
3141.36 3151.78 3152.60 3153.73 3162.14 3162.52  
3164.35 3165.93 3173.99 3175.22 3185.12 3187.05  
3188.43 3191.29 3199.81 3207.32 3218.65 3220.25  
3468.20 3606.99 3615.18

=====  
2C'

=====  
11.42 20.41 21.90 28.12 34.71 37.19  
46.60 49.53 55.25 59.83 66.16 66.81  
70.94 71.89 79.25 88.34 92.07 94.49  
102.27 106.27 110.45 112.96 123.20 126.82  
135.90 138.72 142.75 147.07 150.55 153.04  
157.46 163.66 167.07 178.44 181.53 188.74  
189.62 196.22 202.75 206.86 217.14 223.42  
226.18 231.94 235.69 243.25 245.32 248.84  
250.40 254.30 257.01 260.53 267.16 270.23  
274.22 280.84 284.16 290.87 300.89 307.21  
310.60 322.29 334.28 338.35 351.38 361.89  
374.34 377.51 390.27 390.55 392.98 398.09  
406.47 415.37 418.25 420.94 435.26 453.52  
462.43 476.00 484.03 487.02 495.28 503.81  
516.13 526.53 537.11 543.16 555.62 584.57  
600.50 601.73 613.34 627.84 628.35 631.10  
650.70 654.42 659.22 660.91 661.81 675.26  
705.98 716.81 719.41 743.19 751.92 769.21  
785.18 795.20 820.33 822.27 831.69 850.55  
858.23 859.20 892.94 895.75 900.62 904.29  
911.79 917.32 918.22 936.45 944.34 946.56  
947.25 948.55 958.57 960.51 962.63 968.17

969.14 972.46 973.32 973.76 977.00 980.48  
986.83 987.23 993.82 996.24 1010.13 1019.28  
1036.27 1036.43 1039.25 1044.54 1051.06 1058.48  
1062.15 1065.91 1072.19 1081.12 1085.28 1087.97  
1101.76 1102.59 1105.17 1107.56 1116.44 1122.68  
1125.99 1127.76 1128.88 1131.38 1141.76 1165.72  
1178.41 1181.02 1186.06 1191.56 1193.50 1195.85  
1202.13 1203.81 1208.42 1216.94 1223.67 1224.42  
1246.81 1259.83 1273.21 1281.52 1282.04 1288.66  
1291.64 1295.41 1307.27 1310.66 1325.77 1342.87  
1351.38 1356.87 1357.52 1358.40 1359.47 1368.99  
1376.94 1377.83 1398.97 1405.69 1411.73 1414.68  
1415.87 1416.77 1417.82 1419.18 1420.33 1433.86  
1435.45 1435.87 1437.16 1437.81 1439.03 1445.60  
1464.37 1475.29 1482.02 1488.27 1491.72 1492.43  
1494.20 1497.95 1499.49 1500.66 1500.73 1501.74  
1502.88 1504.90 1505.89 1506.74 1507.30 1508.57  
1510.55 1512.49 1514.09 1516.56 1518.30 1518.58  
1519.75 1522.80 1523.29 1525.31 1525.59 1526.18  
1527.66 1532.92 1534.11 1541.76 1542.59 1588.50  
1604.27 1609.99 1616.97 1623.68 1649.11 1656.10  
1658.43 1664.82 3007.96 3028.29 3033.75 3034.82  
3038.56 3038.78 3038.91 3039.07 3041.10 3042.48  
3042.64 3043.25 3043.88 3046.74 3060.36 3068.60  
3075.08 3079.55 3083.99 3089.46 3091.50 3102.24  
3103.33 3105.11 3107.55 3109.43 3112.51 3113.15  
3113.55 3117.20 3117.69 3119.56 3122.12 3129.66  
3135.05 3137.21 3142.66 3150.04 3150.44 3153.66  
3160.87 3162.78 3163.68 3165.53 3173.65 3174.31  
3176.07 3182.71 3183.17 3184.77 3191.29 3191.55  
3191.65 3197.47 3199.63 3204.30 3206.14 3224.46  
3230.13 3472.13 3588.34

=====  
2D

=====  
10.07 13.84 15.22 19.81 20.05 23.46  
24.89 26.22 28.37 28.51 30.18 34.63  
38.12 41.86 43.75 45.20 46.04 48.50  
54.68 57.51 66.03 71.37 73.03 74.22  
76.17 80.57 85.06 86.65 88.67 97.34  
100.19 102.79 103.89 108.61 110.05 111.58  
118.57 122.95 123.48 135.62 136.45 144.19  
145.15 148.53 151.03 153.37 156.33 162.32  
164.21 165.33 166.41 175.04 176.28 182.40  
185.67 187.66 192.20 192.38 195.82 197.02  
201.21 207.61 212.28 213.13 221.71 224.29  
225.14 228.25 231.05 234.84 235.74 240.12  
240.78 243.46 245.25 246.58 251.23 252.54  
253.11 254.56 256.21 258.29 261.06 264.33  
266.44 268.49 271.71 272.88 273.80 276.50  
280.08 280.60 285.53 290.63 300.76 301.88  
304.63 305.04 306.22 307.78 309.64 312.39  
319.36 338.70 346.00 347.02 347.85 353.29  
357.12 361.37 363.58 365.34 365.55 369.39  
369.85 372.70 374.38 376.09 380.68 386.56  
389.07 393.48 398.14 405.69 409.44 417.19  
432.49 440.13 452.74 454.43 456.10 457.31  
459.67 462.43 472.99 483.87 488.61 493.91

495.02 496.24 499.71 500.19 501.23 502.91  
503.70 504.22 504.72 515.10 538.69 557.20  
584.50 599.20 606.74 615.45 627.89 628.79  
649.24 658.83 660.70 663.30 674.43 714.33  
719.26 743.55 746.54 748.35 750.26 753.00  
753.49 754.54 784.51 794.56 795.84 824.60  
830.72 859.16 861.34 888.34 889.41 890.30  
891.27 891.76 892.99 893.44 894.87 896.31  
896.89 900.89 903.34 918.00 918.88 937.22  
943.58 945.56 946.45 947.96 949.85 950.69  
950.89 951.28 956.74 957.42 963.16 969.64  
973.53 973.64 973.88 977.76 980.97 984.88  
987.36 987.92 995.69 1004.09 1010.45 1010.92  
1033.95 1038.10 1039.32 1039.96 1041.06 1042.58  
1043.62 1044.03 1044.41 1045.50 1050.33 1050.57  
1055.52 1065.93 1068.73 1071.49 1081.20 1085.90  
1087.17 1100.59 1102.50 1106.14 1118.81 1122.82  
1126.28 1127.78 1128.74 1131.26 1140.33 1177.77  
1183.07 1184.75 1190.95 1192.04 1200.06 1202.06  
1209.57 1218.78 1224.21 1230.52 1230.91 1236.49  
1240.62 1241.29 1241.71 1242.25 1242.88 1244.55  
1247.50 1248.65 1249.74 1252.08 1278.49 1285.53  
1286.19 1287.79 1292.17 1294.82 1307.49 1310.10  
1327.46 1346.30 1350.69 1353.11 1353.66 1355.36  
1355.99 1359.18 1372.21 1385.73 1386.63 1393.92  
1394.85 1396.42 1397.15 1398.87 1402.40 1403.54  
1410.39 1411.88 1414.16 1415.84 1416.96 1418.41  
1419.63 1420.10 1423.70 1423.80 1426.84 1427.19  
1431.57 1434.46 1435.26 1435.79 1436.89 1438.13  
1445.57 1462.75 1474.32 1484.85 1485.30 1485.55  
1486.22 1487.48 1488.56 1489.27 1489.44 1489.86  
1490.45 1491.25 1491.50 1491.81 1494.27 1494.80  
1495.37 1497.50 1498.08 1500.18 1500.57 1500.81  
1500.88 1502.33 1503.23 1505.69 1506.61 1507.38  
1507.95 1508.27 1508.38 1508.54 1509.00 1509.83  
1511.30 1511.81 1512.84 1513.34 1516.07 1516.56  
1516.60 1517.20 1518.28 1519.16 1519.32 1521.79  
1522.98 1524.63 1525.11 1526.73 1528.22 1528.88  
1530.81 1533.76 1534.51 1540.32 1590.23 1609.43  
1612.69 1614.50 1620.95 1658.21 1668.61 1726.48  
2993.87 2994.19 3007.04 3008.75 3009.36 3010.34  
3010.38 3015.56 3017.32 3018.33 3020.45 3027.26  
3028.13 3030.05 3033.23 3036.21 3037.00 3038.38  
3040.99 3041.19 3041.39 3042.28 3042.79 3045.75  
3047.15 3057.50 3059.42 3060.09 3060.30 3062.83  
3069.46 3073.84 3075.22 3076.85 3079.23 3080.23  
3082.96 3083.13 3083.92 3085.93 3088.18 3088.33  
3088.76 3089.02 3089.64 3089.82 3091.45 3092.50  
3095.52 3095.69 3096.76 3100.23 3101.36 3102.73  
3102.86 3103.47 3103.92 3107.28 3108.02 3108.94  
3111.42 3113.02 3113.99 3115.15 3115.61 3115.95  
3116.78 3117.19 3118.45 3119.22 3131.19 3135.62  
3143.11 3146.31 3146.89 3156.42 3159.54 3165.86  
3166.92 3168.59 3175.52 3176.77 3184.90 3185.09  
3187.87 3192.27 3193.84 3209.35 3212.92 3216.41  
3221.11 3300.94 3559.41

=====

-11.03 12.77 16.28 20.10 20.33 21.63  
27.45 28.86 29.24 30.50 36.19 37.03  
41.54 42.22 44.31 44.64 49.30 50.60  
52.25 60.81 65.65 68.45 72.83 74.96  
76.97 77.85 81.97 86.94 87.64 89.67  
93.25 97.43 99.73 103.64 106.45 109.58  
112.13 113.24 114.90 120.07 122.77 125.28  
127.09 134.35 138.61 145.45 147.52 151.19  
153.49 154.65 158.42 161.67 165.32 166.97  
170.93 173.19 174.59 178.38 178.81 183.79  
187.27 188.63 195.22 202.87 203.87 208.23  
213.02 213.77 220.18 223.92 225.83 227.74  
230.60 233.69 238.21 239.92 242.74 244.78  
245.70 248.23 249.34 251.97 252.32 254.86  
256.15 257.82 259.47 261.84 264.60 268.99  
269.95 274.28 275.83 280.22 281.97 285.73  
292.51 294.08 301.23 302.91 304.01 305.44  
307.26 308.31 309.73 321.18 333.97 339.88  
342.67 345.96 354.39 358.32 362.44 364.32  
365.71 367.23 369.53 370.22 372.83 375.68  
380.21 380.65 386.22 388.74 390.42 393.75  
399.94 409.53 416.34 418.29 423.93 433.89  
452.25 456.53 457.93 460.36 462.04 465.64  
473.70 477.98 484.22 487.02 488.33 490.52  
494.33 495.39 497.35 498.79 499.28 502.30  
502.79 508.21 515.32 538.12 553.44 557.11  
565.88 583.75 599.52 605.48 614.66 627.75  
628.04 631.83 649.43 659.46 660.98 663.32  
674.42 702.39 709.05 714.02 716.28 742.15  
746.45 746.69 751.27 752.16 752.59 771.11  
784.92 795.99 816.10 824.16 831.24 846.55  
853.35 859.17 883.82 888.62 890.32 891.71  
892.11 892.26 892.65 894.95 896.26 896.99  
900.69 903.82 912.78 914.85 918.79 937.05  
943.41 946.49 947.19 947.76 948.62 948.97  
950.25 950.64 957.83 959.16 963.07 970.23  
972.32 972.60 973.16 973.57 974.68 975.58  
980.15 983.76 987.76 991.71 992.77 1004.25  
1007.21 1009.72 1010.07 1032.78 1037.55 1038.97  
1040.20 1041.31 1043.31 1043.57 1044.02 1044.57  
1044.92 1048.39 1048.68 1052.99 1054.76 1064.74  
1068.10 1072.43 1080.00 1086.20 1087.47 1101.72  
1102.61 1104.15 1109.73 1118.06 1123.63 1126.80  
1128.31 1128.80 1131.60 1140.84 1178.35 1183.27  
1184.96 1191.68 1192.17 1193.93 1200.86 1201.99  
1203.52 1209.54 1217.44 1219.48 1224.57 1228.44  
1232.49 1236.95 1237.29 1240.57 1242.18 1242.70  
1243.13 1244.16 1246.86 1247.64 1248.87 1252.35  
1262.17 1279.51 1284.69 1286.55 1289.37 1292.16  
1295.04 1302.81 1308.48 1310.63 1328.01 1345.86  
1351.40 1352.17 1354.09 1356.17 1359.43 1364.86  
1373.77 1384.62 1389.31 1394.03 1395.68 1397.10  
1397.22 1398.49 1401.56 1403.90 1408.33 1408.62  
1411.57 1414.58 1415.89 1417.41 1419.25 1420.12  
1420.22 1423.25 1424.29 1425.94 1426.23 1432.16  
1433.81 1434.87 1436.19 1437.34 1438.07 1445.73  
1464.32 1474.64 1484.83 1485.15 1485.96 1486.18

1486.70 1488.18 1488.66 1489.48 1489.74 1490.62  
1491.05 1491.42 1493.82 1495.35 1497.17 1497.95  
1498.46 1499.21 1501.03 1501.36 1501.78 1503.58  
1504.97 1505.97 1507.15 1507.67 1507.83 1508.04  
1508.15 1508.23 1508.36 1508.90 1509.21 1510.73  
1511.97 1513.13 1514.11 1516.24 1517.07 1518.83  
1519.04 1519.55 1519.68 1520.50 1521.72 1522.90  
1523.24 1525.50 1525.82 1527.81 1528.97 1533.19  
1535.00 1535.38 1538.09 1540.11 1540.31 1589.63  
1610.77 1611.78 1616.20 1621.49 1648.28 1658.00  
1659.39 1732.86 2981.27 2993.56 3007.11 3009.26  
3010.11 3011.33 3011.96 3017.04 3018.92 3020.68  
3021.89 3027.59 3027.79 3033.48 3033.52 3036.01  
3037.48 3038.35 3040.70 3041.62 3041.90 3042.14  
3044.41 3045.12 3048.08 3057.30 3060.00 3060.67  
3060.87 3063.81 3070.52 3073.93 3076.33 3077.02  
3080.78 3081.22 3082.80 3084.69 3085.13 3085.35  
3085.39 3087.87 3088.28 3088.71 3089.97 3090.02  
3092.34 3093.50 3094.35 3098.61 3099.31 3100.82  
3101.65 3102.34 3102.90 3106.21 3107.40 3109.00  
3109.64 3111.80 3112.26 3113.17 3114.02 3114.54  
3114.84 3116.43 3116.61 3117.22 3118.19 3118.84  
3128.49 3131.26 3136.03 3147.02 3147.75 3148.44  
3155.26 3160.09 3164.50 3165.84 3167.39 3168.95  
3175.41 3175.90 3176.36 3184.71 3185.46 3189.85  
3196.80 3201.34 3202.62 3213.78 3214.76 3216.34  
3218.04 3231.08 3307.63

=====  
2E  
=====

16.83 18.81 22.51 23.80 27.89 28.91  
30.16 34.88 35.85 40.95 43.27 45.30  
45.71 46.80 50.19 55.44 61.11 64.53  
69.09 72.21 74.06 76.69 81.53 82.26  
84.47 90.70 94.36 95.22 99.64 102.72  
105.70 109.99 112.01 120.31 122.15 126.36  
133.19 135.64 138.01 140.93 148.73 149.09  
152.60 156.11 157.11 158.81 162.30 167.80  
178.72 185.30 187.16 187.80 190.12 192.13  
202.86 210.19 212.95 218.51 219.63 222.52  
225.72 228.48 230.95 231.49 233.47 235.98  
239.08 241.99 242.72 246.97 248.68 249.36  
250.58 252.32 252.78 259.49 260.25 262.37  
263.62 267.82 270.29 272.66 275.05 282.56  
284.35 293.77 300.23 301.45 305.57 310.43  
310.92 315.02 316.36 318.78 326.22 328.15  
336.72 342.01 351.25 353.74 357.04 364.04  
366.43 367.61 368.94 371.06 371.91 373.90  
375.11 379.07 386.76 390.80 396.80 406.20  
410.75 430.84 451.68 454.47 456.68 460.39  
462.18 465.49 474.27 476.22 491.59 493.48  
495.16 496.16 497.49 500.11 501.07 505.59  
506.61 510.76 534.35 559.05 584.73 601.00  
606.98 613.78 627.31 631.95 646.84 658.44  
659.06 672.42 675.52 708.50 715.55 743.73  
748.65 750.45 752.06 755.13 786.10 794.02  
824.36 824.89 831.28 855.39 858.83 868.03  
887.50 889.82 890.55 891.21 891.44 893.01

893.72 895.28 901.04 904.91 906.09 917.86  
934.21 944.14 946.47 948.11 949.35 949.72  
951.08 953.57 955.08 956.55 960.30 968.66  
969.56 973.80 974.23 975.06 975.52 986.46  
990.62 997.60 1000.98 1008.02 1009.32 1035.32  
1042.11 1042.44 1042.52 1042.75 1043.63 1044.52  
1046.03 1046.24 1048.87 1057.03 1065.15 1072.98  
1074.96 1080.90 1087.38 1089.93 1099.14 1101.62  
1110.63 1116.60 1119.08 1121.75 1125.96 1127.92  
1129.93 1141.06 1176.99 1183.36 1188.11 1190.52  
1192.78 1198.23 1199.40 1210.00 1214.53 1224.07  
1234.09 1235.15 1238.93 1241.15 1241.80 1243.37  
1243.82 1247.01 1247.54 1251.22 1276.63 1283.63  
1283.76 1287.60 1289.58 1292.85 1308.44 1317.41  
1321.68 1344.16 1349.65 1350.00 1351.98 1357.22  
1358.52 1374.98 1390.23 1392.37 1393.40 1395.14  
1395.96 1398.58 1399.76 1406.13 1414.03 1415.72  
1416.62 1417.28 1417.82 1418.18 1420.41 1420.53  
1421.13 1422.64 1432.22 1435.65 1436.12 1436.69  
1437.71 1439.52 1445.28 1464.37 1474.31 1479.95  
1484.71 1485.23 1485.76 1486.15 1487.64 1488.16  
1488.60 1490.49 1491.14 1491.66 1494.44 1494.79  
1495.62 1496.86 1498.15 1499.22 1500.39 1500.71  
1501.84 1502.39 1505.22 1505.97 1506.84 1507.19  
1507.38 1507.87 1508.60 1508.70 1509.12 1509.97  
1511.04 1512.26 1512.60 1517.60 1517.69 1518.32  
1518.54 1519.13 1520.91 1523.65 1524.25 1524.67  
1525.80 1527.16 1529.19 1529.53 1533.11 1533.95  
1581.01 1589.01 1603.57 1609.37 1615.45 1622.32  
1659.30 2998.79 3004.99 3005.53 3008.83 3010.78  
3014.86 3018.84 3020.48 3026.59 3028.37 3030.25  
3031.27 3031.30 3034.47 3034.58 3037.77 3038.77  
3038.93 3042.19 3043.82 3045.20 3045.46 3053.78  
3063.35 3064.92 3071.25 3072.40 3075.04 3075.65  
3080.80 3081.88 3082.70 3083.16 3084.51 3087.88  
3087.94 3089.58 3090.65 3091.71 3093.53 3093.70  
3093.87 3094.77 3098.88 3101.43 3101.98 3103.75  
3103.92 3105.07 3107.43 3109.90 3110.14 3112.17  
3113.83 3114.07 3115.20 3115.42 3117.13 3120.07  
3121.02 3128.90 3129.30 3136.02 3140.45 3143.82  
3152.92 3153.26 3153.43 3156.68 3162.50 3163.58  
3170.06 3174.18 3180.07 3183.57 3183.81 3188.64  
3190.75 3194.31 3204.05 3224.56 3442.30 3520.01

=====  
2E'  
=====

10.13 15.72 19.68 22.88 25.01 28.20  
29.42 32.30 36.32 37.36 39.85 42.51  
43.75 44.40 49.53 50.18 53.40 54.94  
58.00 64.50 70.29 72.81 75.90 76.94  
82.74 83.52 86.01 89.77 90.45 92.69  
94.43 96.71 101.31 103.04 105.43 106.82  
112.27 120.20 127.69 128.99 134.42 137.70  
139.68 144.05 149.45 150.76 154.38 157.45  
157.64 160.17 166.39 170.14 176.24 183.70  
184.36 189.68 196.45 203.97 207.95 211.89  
215.90 219.07 222.04 225.41 226.77 229.09  
230.86 232.99 234.07 234.58 238.79 242.85



245.80 246.63 250.72 251.65 252.15 256.07  
 256.89 259.88 261.94 267.00 268.37 269.40  
 271.52 273.51 277.95 281.00 283.55 287.28  
 292.81 308.01 308.43 314.52 315.88 316.92  
 320.51 322.71 325.24 326.30 329.54 330.16  
 351.09 357.44 365.67 366.89 368.58 371.01  
 372.24 373.60 374.54 377.38 382.10 383.12  
 391.29 397.47 401.39 409.85 412.10 426.91  
 432.18 452.48 456.34 457.95 460.26 463.10  
 471.59 476.89 486.61 490.48 494.05 495.02  
 497.22 499.69 501.16 502.89 504.86 505.45  
 511.74 533.46 555.70 560.02 567.86 584.92  
 597.87 606.17 614.09 626.95 630.87 636.20  
 646.82 658.67 658.83 673.21 676.16 706.52  
 710.32 714.54 746.06 749.51 750.49 751.40  
 752.60 770.83 783.80 793.87 824.53 825.78  
 830.87 837.72 854.11 858.32 867.17 885.52  
 888.71 890.66 891.87 892.44 892.50 894.36  
 894.56 896.56 900.65 904.56 907.37 917.96  
 933.35 943.57 945.27 946.47 950.10 951.61  
 952.07 953.18 953.91 957.02 959.44 965.57  
 970.12 970.86 973.92 974.84 975.51 978.36  
 985.44 986.73 991.23 996.55 999.69 1005.27  
 1007.17 1010.02 1033.82 1040.67 1042.09 1042.20  
 1042.40 1043.83 1045.32 1046.55 1047.38 1048.72  
 1055.01 1055.94 1065.31 1071.03 1073.34 1080.75  
 1087.54 1089.44 1099.50 1102.77 1108.15 1110.37  
 1117.00 1119.77 1121.74 1126.90 1128.16 1130.69  
 1141.81 1178.32 1182.98 1184.84 1190.09 1190.56  
 1192.20 1198.32 1199.94 1212.44 1213.19 1214.56  
 1224.48 1233.56 1234.78 1239.39 1241.87 1242.60  
 1243.38 1243.63 1244.83 1246.93 1248.21 1251.07  
 1279.61 1283.42 1284.29 1284.87 1287.81 1291.46  
 1293.66 1310.90 1317.98 1326.70 1343.62 1350.55  
 1351.90 1353.04 1357.01 1359.72 1363.61 1376.25  
 1385.45 1386.57 1390.55 1392.69 1393.64 1394.17  
 1396.74 1399.40 1412.12 1414.46 1415.96 1416.29  
 1417.35 1418.02 1418.05 1419.55 1420.13 1420.78  
 1422.75 1430.63 1435.91 1436.33 1437.03 1437.43  
 1439.47 1445.56 1464.68 1475.14 1480.36 1484.22  
 1487.45 1487.87 1488.02 1489.40 1491.35 1492.92  
 1493.44 1494.49 1495.21 1496.01 1496.06 1496.29  
 1496.57 1498.24 1499.52 1500.52 1500.75 1501.99  
 1503.00 1505.34 1506.10 1506.24 1506.48 1507.70  
 1509.25 1509.82 1510.33 1511.09 1511.53 1511.79  
 1512.35 1513.85 1514.21 1517.62 1517.79 1518.67  
 1518.90 1521.22 1523.94 1524.67 1524.80 1525.45  
 1527.72 1528.51 1529.08 1529.23 1530.11 1533.80  
 1534.75 1593.20 1607.39 1609.60 1615.45 1620.50  
 1621.34 1648.63 1659.19 2996.29 2998.49 3001.45  
 3007.33 3013.85 3014.24 3015.60 3021.56 3024.41  
 3027.00 3028.60 3031.81 3032.94 3034.75 3037.44  
 3037.71 3038.55 3038.84 3041.48 3042.01 3045.27  
 3046.41 3056.00 3058.17 3063.16 3067.06 3071.92  
 3075.43 3077.09 3081.04 3082.05 3082.45 3085.33  
 3086.48 3088.74 3089.49 3090.00 3090.98 3091.50  
 3091.97 3094.70 3096.34 3096.75 3100.34 3101.42  
 3102.67 3104.12 3105.77 3106.42 3107.41 3110.13

3113.55 3113.91 3114.03 3114.42 3114.85 3115.17  
 3116.09 3116.98 3117.67 3118.67 3130.02 3133.79  
 3144.16 3144.20 3150.79 3151.60 3152.19 3156.70  
 3157.17 3160.40 3162.13 3164.63 3167.97 3175.28  
 3175.89 3180.51 3181.88 3187.31 3189.75 3190.59  
 3194.83 3195.33 3203.22 3203.60 3229.38 3503.62

=====  
 2F  
 =====

16.11 19.31 26.13 32.60 41.55 46.55  
 49.38 56.80 66.61 73.56 76.29 89.33  
 91.94 99.85 102.72 106.90 114.25 119.30  
 129.08 130.04 139.55 141.48 146.69 152.90  
 154.95 161.64 167.31 168.59 171.97 177.11  
 181.84 190.82 196.74 205.70 210.13 220.98  
 225.03 232.66 238.35 243.82 245.42 249.85  
 253.78 258.70 261.38 266.24 269.08 272.22  
 285.00 287.21 293.89 302.44 305.48 309.62  
 321.60 326.36 339.68 353.52 359.07 366.87  
 375.80 378.95 391.36 397.15 399.17 411.48  
 415.23 428.77 436.11 459.20 468.50 475.42  
 477.80 484.49 493.61 505.32 526.47 529.95  
 549.93 564.57 601.10 607.44 616.84 624.71  
 625.64 644.11 656.64 670.78 671.30 681.26  
 714.70 719.18 729.46 743.78 781.92 786.12  
 812.07 816.69 824.65 846.58 855.37 858.87  
 888.58 899.37 901.92 905.14 908.97 916.45  
 922.18 945.84 946.96 947.95 949.45 950.63  
 953.48 955.34 970.69 971.16 973.45 974.87  
 975.66 985.47 987.13 990.97 1009.13 1026.67  
 1036.29 1042.49 1044.23 1047.28 1053.55 1071.45  
 1075.51 1079.47 1080.27 1088.76 1095.58 1097.13  
 1108.69 1118.12 1119.25 1122.87 1127.20 1128.81  
 1137.53 1143.25 1170.44 1185.45 1190.65 1191.80  
 1195.95 1197.75 1199.48 1206.94 1213.90 1223.16  
 1243.70 1270.31 1279.11 1283.21 1284.89 1286.15  
 1310.34 1314.08 1318.85 1338.92 1344.06 1348.73  
 1350.04 1353.11 1361.28 1367.03 1370.66 1391.58  
 1395.27 1411.07 1413.02 1416.38 1416.88 1417.66  
 1418.22 1421.95 1422.82 1433.12 1435.71 1436.49  
 1438.96 1440.92 1443.31 1464.87 1470.14 1484.84  
 1490.32 1492.60 1496.80 1499.70 1499.92 1500.48  
 1501.06 1502.70 1503.87 1504.82 1505.91 1506.57  
 1507.02 1507.90 1508.31 1511.68 1513.28 1514.91  
 1517.85 1518.65 1519.77 1520.51 1522.80 1525.08  
 1526.25 1527.71 1530.10 1532.32 1534.74 1535.72  
 1581.75 1587.06 1605.79 1608.61 1617.66 1622.75  
 1658.75 2972.05 3012.31 3028.87 3028.97 3032.87  
 3034.85 3039.01 3039.78 3040.46 3041.08 3042.81  
 3043.01 3043.26 3043.53 3044.48 3047.35 3048.91  
 3074.59 3075.65 3082.15 3087.40 3090.52 3100.24  
 3101.87 3103.53 3103.92 3107.82 3109.88 3110.38  
 3113.65 3115.32 3115.87 3116.28 3117.70 3122.64  
 3126.87 3133.53 3134.35 3139.50 3152.40 3157.39  
 3159.78 3166.01 3168.11 3171.57 3173.27 3175.23  
 3176.95 3180.61 3187.57 3190.44 3197.40 3203.53  
 3204.56 3426.56 3506.19

2F'

|         |         |         |         |         |         |
|---------|---------|---------|---------|---------|---------|
| 10.29   | 15.34   | 25.70   | 26.35   | 34.70   | 38.44   |
| 43.24   | 46.43   | 49.49   | 57.58   | 58.42   | 75.72   |
| 76.55   | 84.39   | 91.09   | 93.99   | 100.48  | 105.12  |
| 108.05  | 114.00  | 117.20  | 126.33  | 130.57  | 132.52  |
| 141.72  | 143.39  | 148.92  | 153.70  | 161.59  | 166.96  |
| 171.00  | 174.79  | 181.53  | 188.46  | 192.87  | 201.67  |
| 202.70  | 209.32  | 219.97  | 224.91  | 235.34  | 241.04  |
| 244.11  | 246.93  | 253.11  | 255.44  | 257.09  | 262.77  |
| 266.89  | 269.54  | 271.44  | 284.86  | 286.23  | 294.57  |
| 295.59  | 303.82  | 306.98  | 318.01  | 321.82  | 332.40  |
| 341.23  | 351.05  | 354.75  | 362.99  | 371.05  | 376.71  |
| 388.69  | 395.39  | 395.91  | 410.30  | 414.52  | 417.23  |
| 423.86  | 425.09  | 436.94  | 458.67  | 468.35  | 473.02  |
| 483.25  | 488.88  | 495.18  | 496.94  | 518.56  | 542.63  |
| 549.15  | 560.35  | 586.06  | 594.72  | 603.84  | 617.15  |
| 620.31  | 622.73  | 636.23  | 639.49  | 656.76  | 670.49  |
| 671.77  | 681.26  | 701.54  | 710.58  | 713.36  | 720.29  |
| 748.17  | 759.58  | 765.52  | 771.21  | 780.89  | 807.68  |
| 822.17  | 828.77  | 839.76  | 853.49  | 858.71  | 875.73  |
| 888.88  | 899.01  | 901.21  | 906.21  | 912.08  | 916.48  |
| 918.50  | 945.19  | 947.20  | 949.04  | 949.65  | 950.12  |
| 952.32  | 953.19  | 955.75  | 967.55  | 971.11  | 972.33  |
| 973.52  | 974.74  | 975.34  | 985.38  | 987.74  | 993.49  |
| 999.17  | 1009.02 | 1018.89 | 1032.39 | 1039.18 | 1041.89 |
| 1044.90 | 1051.44 | 1052.46 | 1071.72 | 1076.89 | 1079.54 |
| 1080.19 | 1086.73 | 1094.34 | 1101.83 | 1106.50 | 1107.97 |
| 1108.87 | 1118.59 | 1120.28 | 1126.82 | 1128.46 | 1134.88 |
| 1143.78 | 1168.82 | 1184.70 | 1189.28 | 1189.69 | 1192.77 |
| 1196.86 | 1197.96 | 1199.27 | 1201.08 | 1209.12 | 1216.44 |
| 1221.44 | 1236.24 | 1237.87 | 1267.40 | 1279.04 | 1280.65 |
| 1284.50 | 1285.77 | 1299.78 | 1302.10 | 1313.09 | 1316.55 |
| 1337.20 | 1342.75 | 1348.41 | 1352.34 | 1353.06 | 1358.93 |
| 1359.67 | 1365.76 | 1368.79 | 1381.70 | 1389.07 | 1390.62 |
| 1405.17 | 1407.64 | 1413.66 | 1416.72 | 1417.59 | 1418.21 |
| 1419.60 | 1423.86 | 1431.87 | 1435.79 | 1436.51 | 1439.71 |
| 1441.64 | 1444.21 | 1466.48 | 1467.53 | 1483.12 | 1489.06 |
| 1490.75 | 1496.69 | 1499.44 | 1499.79 | 1500.62 | 1500.99 |
| 1502.78 | 1503.02 | 1504.04 | 1504.79 | 1505.57 | 1506.47 |
| 1507.01 | 1507.37 | 1510.31 | 1510.85 | 1512.17 | 1514.06 |
| 1514.43 | 1518.57 | 1520.13 | 1520.43 | 1522.91 | 1524.67 |
| 1525.57 | 1526.65 | 1527.05 | 1531.12 | 1533.34 | 1535.59 |
| 1537.76 | 1584.26 | 1604.47 | 1606.84 | 1615.12 | 1618.67 |
| 1623.53 | 1644.16 | 1657.20 | 2960.85 | 3013.36 | 3028.93 |
| 3034.43 | 3035.03 | 3038.40 | 3039.06 | 3039.34 | 3041.01 |
| 3041.85 | 3042.97 | 3043.11 | 3043.76 | 3046.19 | 3047.56 |
| 3050.21 | 3050.43 | 3076.39 | 3078.54 | 3083.66 | 3086.55 |
| 3089.58 | 3101.15 | 3103.02 | 3103.54 | 3104.92 | 3106.83 |
| 3109.55 | 3110.61 | 3113.89 | 3114.59 | 3115.97 | 3117.02 |
| 3117.99 | 3124.11 | 3126.74 | 3133.02 | 3136.61 | 3141.42 |
| 3144.14 | 3146.02 | 3148.38 | 3159.94 | 3160.27 | 3164.75 |
| 3166.90 | 3167.37 | 3167.56 | 3168.60 | 3174.20 | 3177.04 |
| 3181.71 | 3185.46 | 3187.17 | 3187.21 | 3187.64 | 3194.94 |
| 3198.55 | 3204.77 | 3504.39 |         |         |         |

2G

|         |         |         |         |         |         |
|---------|---------|---------|---------|---------|---------|
| 24.85   | 35.61   | 42.41   | 46.96   | 49.88   | 53.16   |
| 60.79   | 66.13   | 75.26   | 78.20   | 82.16   | 91.88   |
| 93.72   | 96.03   | 103.17  | 108.19  | 113.49  | 118.99  |
| 123.72  | 134.66  | 141.92  | 143.82  | 148.13  | 157.71  |
| 159.59  | 164.22  | 166.89  | 175.19  | 177.28  | 181.58  |
| 185.96  | 193.83  | 196.94  | 213.67  | 217.86  | 229.96  |
| 231.83  | 235.77  | 240.33  | 244.08  | 245.88  | 250.27  |
| 254.10  | 256.84  | 260.77  | 264.96  | 271.61  | 273.05  |
| 274.52  | 278.62  | 282.05  | 288.47  | 296.40  | 303.54  |
| 308.16  | 324.09  | 332.50  | 347.60  | 353.31  | 356.42  |
| 367.83  | 382.49  | 383.89  | 393.32  | 405.25  | 411.19  |
| 414.80  | 426.21  | 452.45  | 456.40  | 464.33  | 475.03  |
| 480.67  | 484.37  | 489.08  | 505.56  | 517.55  | 534.62  |
| 555.96  | 586.42  | 595.25  | 616.62  | 627.19  | 627.60  |
| 631.13  | 638.99  | 652.18  | 653.78  | 666.23  | 671.71  |
| 717.38  | 722.54  | 744.92  | 751.25  | 783.77  | 789.98  |
| 811.28  | 813.88  | 832.78  | 858.97  | 859.12  | 884.11  |
| 895.19  | 895.87  | 902.25  | 906.85  | 911.27  | 919.28  |
| 939.06  | 943.95  | 947.07  | 949.06  | 951.84  | 959.70  |
| 961.23  | 965.15  | 971.73  | 974.19  | 974.64  | 975.06  |
| 985.39  | 986.16  | 989.91  | 990.80  | 1009.92 | 1038.31 |
| 1040.43 | 1042.51 | 1045.61 | 1054.24 | 1058.79 | 1068.57 |
| 1071.56 | 1082.60 | 1086.91 | 1090.11 | 1096.85 | 1106.71 |
| 1115.77 | 1119.42 | 1124.09 | 1126.87 | 1129.24 | 1129.59 |
| 1132.21 | 1143.78 | 1175.47 | 1184.78 | 1190.66 | 1192.45 |
| 1195.75 | 1200.55 | 1201.51 | 1209.89 | 1214.17 | 1224.49 |
| 1251.96 | 1280.84 | 1282.75 | 1285.28 | 1293.86 | 1297.56 |
| 1306.06 | 1309.90 | 1326.37 | 1344.90 | 1348.19 | 1348.37 |
| 1349.78 | 1350.22 | 1358.43 | 1361.50 | 1376.86 | 1401.90 |
| 1411.80 | 1413.62 | 1414.47 | 1417.52 | 1418.88 | 1420.05 |
| 1422.84 | 1425.97 | 1430.93 | 1432.74 | 1433.39 | 1434.08 |
| 1437.61 | 1439.56 | 1445.40 | 1464.07 | 1478.85 | 1486.04 |
| 1488.69 | 1492.32 | 1495.60 | 1498.41 | 1498.96 | 1499.20 |
| 1499.86 | 1500.85 | 1502.55 | 1503.59 | 1504.70 | 1505.69 |
| 1506.02 | 1506.45 | 1508.62 | 1508.79 | 1511.36 | 1514.53 |
| 1514.89 | 1515.72 | 1517.50 | 1519.03 | 1520.99 | 1521.72 |
| 1524.52 | 1526.57 | 1527.37 | 1528.21 | 1530.59 | 1534.15 |
| 1579.01 | 1593.49 | 1598.85 | 1609.32 | 1616.91 | 1621.91 |
| 1657.76 | 3011.23 | 3025.80 | 3030.55 | 3032.39 | 3034.31 |
| 3036.55 | 3036.99 | 3037.21 | 3038.39 | 3039.82 | 3040.75 |
| 3041.26 | 3042.02 | 3044.74 | 3045.57 | 3052.47 | 3071.93 |
| 3084.32 | 3088.50 | 3091.15 | 3091.68 | 3096.51 | 3101.16 |
| 3102.15 | 3105.01 | 3106.51 | 3108.82 | 3109.08 | 3110.85 |
| 3113.67 | 3116.38 | 3118.92 | 3119.23 | 3122.24 | 3127.20 |
| 3128.89 | 3129.52 | 3135.33 | 3135.69 | 3139.27 | 3151.81 |
| 3155.30 | 3157.90 | 3160.04 | 3162.82 | 3164.51 | 3170.87 |
| 3172.08 | 3183.53 | 3184.64 | 3188.36 | 3190.71 | 3196.94 |
| 3197.07 | 3419.56 | 3505.18 |         |         |         |

2G'

|        |        |        |        |        |        |
|--------|--------|--------|--------|--------|--------|
| 16.96  | 23.10  | 25.99  | 30.83  | 36.66  | 40.29  |
| 48.45  | 53.37  | 56.91  | 64.37  | 71.83  | 77.02  |
| 79.74  | 83.81  | 87.48  | 95.82  | 97.06  | 101.76 |
| 107.98 | 115.13 | 118.26 | 128.45 | 132.01 | 137.02 |
| 144.02 | 146.48 | 150.28 | 153.94 | 158.71 | 163.49 |
| 172.05 | 174.35 | 179.86 | 183.09 | 195.68 | 207.23 |
| 212.81 | 215.76 | 223.83 | 230.92 | 233.02 | 239.01 |

|         |         |         |         |         |         |
|---------|---------|---------|---------|---------|---------|
| 241.83  | 245.43  | 246.25  | 250.84  | 253.06  | 258.29  |
| 263.30  | 265.93  | 271.76  | 274.51  | 279.82  | 285.14  |
| 296.90  | 299.66  | 305.76  | 311.90  | 327.96  | 331.39  |
| 335.92  | 350.35  | 354.48  | 359.81  | 367.59  | 379.50  |
| 383.61  | 393.08  | 404.97  | 410.61  | 411.49  | 421.29  |
| 425.15  | 453.29  | 455.93  | 464.16  | 474.74  | 477.59  |
| 481.65  | 484.83  | 490.09  | 515.71  | 533.26  | 550.25  |
| 554.84  | 582.96  | 584.24  | 595.50  | 615.17  | 626.21  |
| 627.45  | 629.16  | 633.67  | 639.56  | 651.46  | 653.49  |
| 665.72  | 671.67  | 700.32  | 710.47  | 722.19  | 738.90  |
| 742.30  | 750.38  | 765.70  | 783.45  | 788.47  | 811.36  |
| 824.31  | 831.28  | 847.33  | 850.03  | 857.02  | 872.56  |
| 895.47  | 896.18  | 902.70  | 903.52  | 907.25  | 918.23  |
| 937.88  | 943.77  | 944.25  | 944.34  | 948.35  | 949.50  |
| 957.50  | 958.72  | 963.18  | 965.08  | 969.13  | 973.71  |
| 974.33  | 976.34  | 985.31  | 986.16  | 986.49  | 989.32  |
| 1003.49 | 1009.77 | 1037.94 | 1038.99 | 1042.06 | 1045.14 |
| 1052.54 | 1054.44 | 1059.05 | 1068.03 | 1071.27 | 1081.56 |
| 1085.97 | 1087.66 | 1099.77 | 1104.56 | 1105.99 | 1116.22 |
| 1119.27 | 1123.52 | 1128.15 | 1129.46 | 1130.25 | 1132.24 |
| 1141.05 | 1174.93 | 1184.63 | 1186.56 | 1189.13 | 1190.88 |
| 1195.92 | 1199.90 | 1201.73 | 1206.49 | 1209.59 | 1214.79 |
| 1222.54 | 1243.35 | 1251.78 | 1279.76 | 1282.33 | 1283.79 |
| 1292.32 | 1298.24 | 1303.93 | 1312.17 | 1313.43 | 1325.68 |
| 1345.10 | 1348.27 | 1349.42 | 1349.99 | 1350.61 | 1356.48 |
| 1362.33 | 1362.81 | 1375.52 | 1384.40 | 1400.43 | 1412.04 |
| 1414.60 | 1417.21 | 1417.65 | 1418.69 | 1419.89 | 1422.92 |
| 1426.21 | 1431.22 | 1433.18 | 1434.28 | 1437.80 | 1438.42 |
| 1439.71 | 1445.88 | 1465.05 | 1476.88 | 1485.65 | 1489.00 |
| 1491.54 | 1495.79 | 1497.69 | 1498.64 | 1498.95 | 1500.21 |
| 1501.28 | 1502.68 | 1503.36 | 1503.89 | 1504.82 | 1505.60 |
| 1505.64 | 1506.62 | 1508.07 | 1509.36 | 1510.97 | 1514.46 |
| 1515.86 | 1516.94 | 1517.48 | 1519.35 | 1521.24 | 1521.38 |
| 1523.21 | 1525.23 | 1526.77 | 1528.45 | 1530.25 | 1530.63 |
| 1534.19 | 1593.19 | 1595.71 | 1609.29 | 1618.64 | 1620.20 |
| 1621.60 | 1649.96 | 1654.23 | 3011.53 | 3023.20 | 3035.09 |
| 3035.76 | 3037.13 | 3037.31 | 3037.89 | 3039.31 | 3041.31 |
| 3042.05 | 3042.85 | 3043.14 | 3044.30 | 3045.69 | 3046.46 |
| 3054.05 | 3072.23 | 3085.37 | 3087.93 | 3089.44 | 3091.31 |
| 3102.01 | 3103.80 | 3105.38 | 3107.65 | 3109.55 | 3111.08 |
| 3111.63 | 3113.03 | 3115.42 | 3115.84 | 3121.70 | 3123.51 |
| 3124.09 | 3126.87 | 3128.65 | 3132.29 | 3136.78 | 3137.69 |
| 3150.50 | 3154.87 | 3156.68 | 3156.94 | 3158.35 | 3159.89 |
| 3161.49 | 3165.66 | 3167.72 | 3169.37 | 3172.09 | 3172.88 |
| 3180.88 | 3183.22 | 3189.62 | 3192.38 | 3196.23 | 3196.75 |
| 3205.32 | 3227.05 | 3498.94 |         |         |         |

2G-TS

|         |        |        |        |        |        |
|---------|--------|--------|--------|--------|--------|
| -413.44 | 24.90  | 35.41  | 38.21  | 47.87  | 49.74  |
| 53.30   | 54.57  | 59.59  | 68.48  | 75.98  | 81.90  |
| 84.73   | 94.07  | 97.92  | 100.46 | 107.76 | 116.75 |
| 117.66  | 127.78 | 133.27 | 142.77 | 144.40 | 147.78 |
| 152.91  | 161.08 | 162.73 | 165.07 | 168.02 | 173.58 |
| 179.53  | 182.72 | 195.20 | 217.82 | 232.33 | 233.53 |
| 235.33  | 238.20 | 244.91 | 247.30 | 248.78 | 250.04 |
| 255.22  | 256.83 | 259.73 | 267.55 | 271.55 | 276.05 |
| 279.81  | 282.61 | 289.57 | 297.48 | 299.72 | 308.42 |

|         |         |         |         |         |         |
|---------|---------|---------|---------|---------|---------|
| 319.22  | 331.37  | 347.87  | 355.15  | 356.65  | 366.36  |
| 380.18  | 382.70  | 385.71  | 393.14  | 406.67  | 411.07  |
| 424.30  | 425.48  | 428.77  | 451.84  | 454.44  | 464.77  |
| 468.71  | 475.69  | 482.99  | 487.96  | 514.25  | 534.09  |
| 556.68  | 586.38  | 594.53  | 616.07  | 622.74  | 626.62  |
| 629.10  | 636.87  | 639.81  | 650.00  | 655.12  | 672.32  |
| 684.35  | 718.08  | 720.85  | 750.88  | 770.37  | 782.67  |
| 788.00  | 812.53  | 833.76  | 833.98  | 859.25  | 872.62  |
| 881.53  | 895.91  | 896.26  | 901.91  | 905.39  | 916.41  |
| 938.77  | 943.71  | 947.03  | 949.52  | 949.65  | 956.76  |
| 959.64  | 961.62  | 965.84  | 973.10  | 974.02  | 974.08  |
| 976.16  | 985.10  | 985.59  | 989.76  | 999.46  | 1013.66 |
| 1038.57 | 1042.82 | 1045.46 | 1052.34 | 1056.51 | 1057.99 |
| 1068.16 | 1071.91 | 1083.78 | 1088.71 | 1099.83 | 1105.77 |
| 1112.74 | 1118.89 | 1123.74 | 1126.84 | 1127.84 | 1129.30 |
| 1132.59 | 1141.86 | 1176.80 | 1184.99 | 1188.58 | 1192.07 |
| 1195.15 | 1199.05 | 1202.00 | 1208.83 | 1209.60 | 1224.94 |
| 1249.42 | 1277.81 | 1280.45 | 1287.09 | 1290.43 | 1294.97 |
| 1300.03 | 1312.22 | 1326.31 | 1345.66 | 1346.85 | 1349.85 |
| 1350.97 | 1351.87 | 1357.73 | 1360.28 | 1376.08 | 1398.98 |
| 1411.02 | 1413.10 | 1415.24 | 1416.57 | 1417.75 | 1419.57 |
| 1421.60 | 1425.10 | 1429.88 | 1432.02 | 1432.57 | 1435.14 |
| 1436.56 | 1438.00 | 1444.05 | 1469.57 | 1475.87 | 1486.39 |
| 1489.35 | 1491.69 | 1495.28 | 1495.98 | 1497.39 | 1498.44 |
| 1499.08 | 1499.99 | 1500.48 | 1502.34 | 1504.20 | 1504.38 |
| 1505.72 | 1506.59 | 1507.79 | 1508.25 | 1510.83 | 1514.72 |
| 1515.23 | 1516.07 | 1517.25 | 1519.40 | 1520.18 | 1520.96 |
| 1524.49 | 1524.82 | 1526.36 | 1527.95 | 1530.47 | 1532.80 |
| 1568.25 | 1594.41 | 1602.86 | 1605.53 | 1608.59 | 1620.24 |
| 1657.02 | 3010.72 | 3024.28 | 3031.37 | 3032.28 | 3033.33 |
| 3035.63 | 3036.14 | 3036.31 | 3037.03 | 3037.09 | 3038.31 |
| 3040.26 | 3041.81 | 3044.82 | 3045.53 | 3050.53 | 3071.39 |
| 3081.47 | 3082.72 | 3087.89 | 3091.01 | 3098.29 | 3099.78 |
| 3099.99 | 3103.35 | 3105.79 | 3107.99 | 3109.03 | 3111.04 |
| 3112.71 | 3114.16 | 3116.24 | 3117.09 | 3123.68 | 3125.58 |
| 3130.90 | 3132.89 | 3134.54 | 3134.77 | 3139.20 | 3148.10 |
| 3151.62 | 3157.98 | 3159.54 | 3160.49 | 3163.26 | 3171.39 |
| 3172.00 | 3178.58 | 3181.93 | 3183.51 | 3186.44 | 3197.31 |
| 3197.88 | 3535.65 | 3639.41 |         |         |         |

2G'-TS

|         |        |        |        |        |        |
|---------|--------|--------|--------|--------|--------|
| -394.04 | 12.01  | 24.63  | 26.86  | 35.73  | 39.19  |
| 45.05   | 51.90  | 55.32  | 57.30  | 66.61  | 67.10  |
| 77.32   | 79.34  | 84.08  | 90.46  | 96.93  | 100.87 |
| 105.26  | 114.20 | 116.18 | 118.72 | 129.96 | 131.66 |
| 140.79  | 143.64 | 148.00 | 151.26 | 153.31 | 160.80 |
| 163.44  | 171.50 | 173.77 | 179.17 | 182.16 | 197.11 |
| 217.41  | 222.49 | 227.66 | 231.83 | 234.70 | 238.23 |
| 243.67  | 246.07 | 248.26 | 251.38 | 252.17 | 255.44 |
| 259.91  | 265.90 | 269.45 | 272.48 | 276.25 | 281.30 |
| 282.26  | 296.09 | 299.78 | 302.15 | 309.39 | 324.74 |
| 332.30  | 349.42 | 355.87 | 358.68 | 365.96 | 378.32 |
| 382.79  | 392.17 | 405.01 | 410.65 | 421.60 | 425.23 |
| 429.68  | 450.33 | 451.65 | 454.57 | 465.27 | 475.78 |
| 483.07  | 488.00 | 513.43 | 513.79 | 534.46 | 547.22 |
| 556.98  | 584.21 | 586.92 | 594.88 | 616.65 | 621.03 |
| 626.27  | 628.30 | 632.85 | 637.73 | 639.86 | 650.19 |

654.75 673.04 698.73 705.49 721.48 726.04  
750.54 767.28 782.33 785.45 787.79 812.62  
829.55 833.91 835.51 858.63 861.20 869.01  
885.51 895.43 896.20 903.86 904.29 918.12  
937.81 943.43 943.57 947.72 949.20 951.83  
955.41 957.26 960.56 964.04 973.40 973.77  
975.09 975.39 977.58 985.00 985.48 990.34  
997.67 1000.27 1009.38 1038.28 1042.72 1045.36  
1052.19 1054.00 1054.92 1057.79 1068.00 1071.73  
1083.14 1087.24 1104.36 1104.94 1109.42 1113.08  
1118.84 1123.18 1126.61 1127.97 1129.88 1132.22  
1140.53 1176.25 1184.65 1188.81 1189.22 1190.18  
1194.54 1198.28 1201.64 1206.62 1209.48 1212.25  
1223.09 1249.50 1258.43 1277.83 1278.71 1285.75  
1289.84 1294.46 1298.53 1306.26 1322.21 1323.81  
1345.86 1346.36 1348.84 1349.74 1355.73 1357.14  
1362.33 1364.34 1374.94 1392.15 1397.83 1410.40  
1413.25 1416.58 1417.25 1417.87 1419.44 1421.85  
1425.22 1429.92 1432.26 1432.92 1436.64 1438.13  
1438.66 1444.27 1471.35 1473.37 1485.85 1489.37  
1492.76 1494.40 1495.65 1496.56 1497.90 1499.09  
1499.87 1500.96 1502.62 1503.35 1504.44 1505.57  
1506.28 1507.45 1507.82 1508.44 1510.40 1514.23  
1515.17 1516.84 1517.06 1519.08 1520.22 1521.12  
1523.84 1524.57 1526.38 1528.15 1530.41 1533.28  
1534.83 1594.19 1602.34 1603.80 1608.84 1619.07  
1630.55 1654.24 1655.43 3010.94 3022.79 3032.84  
3034.26 3035.27 3035.88 3036.62 3037.45 3038.35  
3038.51 3041.17 3041.49 3043.71 3045.62 3046.36  
3051.95 3071.59 3083.32 3084.92 3087.07 3091.45  
3100.42 3102.03 3102.82 3103.22 3108.16 3108.24  
3110.80 3111.26 3112.72 3113.88 3116.70 3122.19  
3123.26 3127.18 3130.85 3131.65 3135.01 3138.68  
3148.45 3151.74 3155.64 3158.64 3159.31 3159.69  
3165.33 3165.58 3168.67 3168.90 3174.97 3179.23  
3179.89 3179.97 3181.77 3197.36 3198.71 3199.37  
3212.64 3214.36 3579.78

2H

13.67 26.05 30.66 37.60 42.25 45.40  
45.70 61.73 65.52 67.73 71.48 73.98  
79.82 82.94 92.66 98.20 100.69 106.04  
111.01 117.70 130.47 133.94 136.34 144.39  
145.84 159.31 161.47 167.36 173.31 182.01  
187.62 190.64 197.04 220.39 227.45 228.63  
239.20 241.28 245.45 251.35 253.10 258.29  
260.99 263.82 272.49 276.04 280.59 290.98  
293.40 297.14 303.87 310.22 322.65 336.97  
339.63 353.95 359.24 367.87 373.81 377.49  
384.93 386.48 395.10 409.79 414.84 417.05  
436.88 449.94 452.13 467.06 476.00 479.73  
487.38 515.34 517.71 533.20 544.26 549.57  
556.48 586.28 592.39 615.17 621.55 628.47  
634.96 636.21 650.99 652.59 672.51 703.43  
718.75 747.57 761.40 780.91 786.42 808.53  
823.05 833.56 836.89 857.36 885.21 895.62  
896.26 903.24 904.32 916.08 924.74 937.41

945.08 947.23 948.14 949.22 953.90 959.78  
960.55 964.85 972.91 974.49 975.90 980.96  
984.30 984.39 988.00 1015.37 1039.09 1042.48  
1044.48 1046.51 1056.96 1060.56 1067.15 1072.04  
1079.92 1085.65 1094.60 1106.75 1108.39 1116.97  
1120.48 1124.07 1128.93 1130.23 1133.36 1138.34  
1155.64 1175.88 1185.49 1190.61 1192.75 1193.91  
1197.64 1202.51 1209.04 1213.02 1222.56 1246.30  
1268.13 1275.31 1278.63 1283.04 1287.22 1292.35  
1294.65 1321.65 1342.38 1350.17 1351.80 1355.39  
1359.13 1359.68 1367.38 1372.86 1375.40 1400.15  
1408.59 1411.80 1411.97 1412.99 1417.27 1417.46  
1418.77 1421.79 1429.44 1430.48 1431.55 1433.22  
1435.14 1436.95 1439.16 1471.74 1486.26 1489.47  
1491.13 1495.07 1495.74 1497.33 1499.42 1500.78  
1501.31 1501.87 1502.66 1503.67 1505.92 1506.96  
1507.54 1508.67 1512.48 1513.12 1514.59 1515.46  
1517.41 1518.18 1519.32 1520.20 1521.85 1524.27  
1526.48 1528.06 1528.16 1530.90 1532.38 1543.31  
1592.69 1600.21 1607.71 1646.08 1648.61 1657.33  
1667.29 3009.34 3019.01 3023.52 3025.88 3027.46  
3030.74 3032.77 3033.40 3033.94 3035.21 3035.98  
3037.15 3037.77 3038.42 3044.75 3054.35 3070.05  
3079.57 3080.61 3084.06 3088.67 3092.42 3095.32  
3096.63 3096.77 3098.76 3101.49 3104.90 3105.56  
3107.88 3109.20 3112.65 3112.89 3117.01 3117.21  
3119.40 3124.92 3128.68 3129.22 3131.90 3135.95  
3138.61 3140.41 3147.68 3159.61 3164.51 3168.43  
3170.95 3178.27 3188.41 3190.51 3192.29 3203.35  
3218.48 3488.95 3593.13

2H'

10.23 17.53 27.83 33.11 35.38 39.33  
45.09 46.76 50.01 56.83 64.22 67.80  
70.97 76.28 78.77 83.26 86.81 94.77  
100.56 103.51 110.52 115.51 117.39 128.33  
131.40 134.36 143.12 148.54 154.04 156.44  
165.71 170.64 173.95 185.58 190.82 193.07  
217.41 223.95 235.19 236.31 241.65 245.76  
246.57 252.25 253.56 256.02 264.95 269.06  
270.88 273.12 278.53 289.41 291.96 292.92  
301.90 303.30 310.36 313.41 322.52 333.94  
349.47 355.62 366.62 371.18 381.40 389.70  
396.85 409.56 413.22 417.82 426.49 433.21  
451.58 453.90 464.90 468.21 473.37 479.18  
481.38 486.74 514.78 532.50 536.72 556.79  
577.42 582.23 591.55 615.37 619.07 626.83  
629.69 633.57 636.31 638.43 648.72 651.62  
671.89 704.75 712.99 719.34 748.28 762.25  
766.69 779.64 786.80 809.10 815.62 833.79  
840.30 856.71 862.65 864.89 894.21 896.25  
899.23 904.21 905.13 918.48 924.87 937.52  
942.73 945.94 946.37 949.96 953.29 956.64  
961.00 962.26 963.48 973.85 974.58 975.60  
980.08 982.36 984.73 986.07 988.84 1001.87  
1015.62 1018.38 1039.18 1042.52 1044.55 1046.33  
1054.50 1056.77 1060.02 1067.53 1071.93 1079.17

1088.69 1104.55 1105.37 1107.71 1115.63 1117.48  
1120.79 1124.52 1127.49 1128.83 1133.33 1139.29  
1175.87 1185.62 1189.42 1192.27 1192.92 1193.94  
1197.95 1200.99 1201.79 1209.45 1211.76 1223.77  
1226.35 1247.16 1257.08 1268.36 1277.16 1285.52  
1286.33 1291.97 1297.92 1322.68 1324.74 1334.27  
1341.42 1346.96 1349.67 1353.61 1358.06 1360.10  
1362.35 1365.92 1376.60 1399.17 1410.49 1410.83  
1411.39 1414.37 1416.40 1417.44 1418.37 1421.80  
1429.30 1430.33 1431.12 1431.77 1434.05 1435.33  
1439.92 1440.22 1471.11 1486.49 1489.54 1490.89  
1495.37 1495.88 1496.11 1497.08 1499.29 1500.52  
1500.91 1501.64 1502.17 1504.41 1505.51 1506.56  
1507.45 1508.88 1511.95 1514.60 1514.89 1516.58  
1517.56 1519.41 1519.99 1521.24 1523.09 1524.49  
1526.03 1526.69 1528.29 1530.21 1531.31 1534.39  
1539.11 1593.30 1601.70 1608.21 1639.56 1649.24  
1650.66 1654.60 1663.22 2999.17 3009.18 3024.42  
3025.16 3025.93 3029.83 3031.13 3031.70 3032.82  
3034.14 3034.49 3035.87 3037.38 3038.28 3045.01  
3049.79 3069.82 3079.44 3081.12 3090.78 3091.06  
3091.65 3094.64 3096.69 3097.24 3097.56 3100.74  
3102.24 3105.65 3106.42 3108.97 3113.25 3113.42  
3118.84 3119.71 3121.44 3122.72 3127.09 3131.25  
3131.30 3131.79 3134.78 3137.77 3154.55 3154.92  
3160.62 3162.11 3173.58 3173.84 3180.80 3182.14  
3186.94 3187.28 3188.40 3191.38 3199.70 3201.58  
3206.70 3214.87 3451.35

2I

10.54 27.98 36.52 43.24 45.39 49.21  
55.15 64.19 71.42 76.52 87.25 91.72  
98.57 99.52 115.27 117.70 119.26 125.00  
130.51 136.56 139.75 146.53 151.68 160.33  
166.23 168.11 174.79 180.23 184.12 190.63  
193.69 205.47 207.20 212.18 213.25 220.57  
230.85 238.16 244.97 248.82 252.16 255.08  
261.61 263.67 274.01 277.49 283.99 285.99  
295.82 296.93 302.15 305.10 313.50 321.05  
328.08 332.84 348.55 357.07 358.70 372.04  
375.34 383.13 389.14 395.65 402.34 413.62  
424.02 446.92 457.54 460.63 469.54 482.08  
483.63 488.84 497.16 504.25 529.06 550.09  
575.12 592.42 592.87 611.81 621.88 625.04  
642.24 645.70 654.08 666.03 668.39 716.78  
719.01 725.72 754.43 765.21 782.92 799.31  
826.07 845.73 860.65 888.77 894.59 899.22  
902.52 915.91 917.13 925.68 937.06 945.38  
949.06 950.23 957.59 961.10 962.10 971.63  
974.14 975.12 976.69 982.28 983.16 983.66  
999.73 1006.95 1033.18 1035.48 1035.90 1047.25  
1059.52 1062.93 1070.31 1073.55 1076.49 1086.05  
1094.93 1096.17 1100.78 1101.06 1105.26 1108.99  
1112.82 1115.55 1126.83 1129.59 1139.03 1162.10  
1184.03 1187.33 1189.76 1192.71 1194.40 1196.70  
1201.76 1215.64 1218.32 1233.20 1261.49 1278.54  
1284.55 1289.25 1290.14 1306.96 1307.99 1312.78

1325.56 1330.50 1331.78 1348.08 1350.42 1351.74  
1353.00 1367.67 1390.30 1397.76 1411.20 1413.30  
1413.82 1417.85 1418.18 1419.35 1423.26 1430.94  
1435.31 1436.27 1437.07 1438.78 1440.98 1445.15  
1461.72 1474.32 1480.98 1483.69 1486.13 1489.20  
1493.61 1495.17 1496.79 1498.19 1499.27 1499.96  
1500.84 1503.12 1504.39 1505.51 1506.68 1508.51  
1509.79 1511.26 1514.43 1516.83 1517.89 1518.83  
1520.75 1524.16 1524.97 1526.37 1527.13 1529.05  
1533.71 1534.42 1537.70 1584.98 1605.32 1609.37  
1613.75 1618.17 1660.50 3006.30 3024.80 3031.44  
3035.10 3035.57 3035.62 3036.19 3036.59 3039.59  
3040.50 3042.54 3044.28 3049.45 3051.71 3061.88  
3065.19 3071.97 3081.92 3088.35 3092.78 3095.94  
3097.91 3098.67 3099.87 3103.46 3105.10 3105.28  
3107.51 3109.12 3118.74 3118.87 3122.53 3130.30  
3131.82 3137.28 3139.62 3140.71 3140.87 3143.78  
3143.92 3154.30 3159.35 3161.41 3165.34 3171.64  
3174.54 3177.48 3179.63 3184.43 3190.23 3191.83  
3200.42 3213.25 3236.60

3

15.93 23.35 30.86 37.97 40.80 43.53  
52.38 53.68 55.56 59.60 62.51 67.12  
74.22 76.14 77.47 84.57 87.45 96.49  
97.93 98.81 111.48 116.30 133.75 135.03  
139.62 142.68 145.88 147.58 155.15 164.64  
169.27 179.31 181.44 186.71 196.01 198.97  
210.16 220.10 226.83 236.35 243.18 245.60  
248.99 250.14 257.32 265.73 269.31 272.76  
278.36 282.40 288.80 292.42 304.62 306.13  
318.75 323.45 330.94 336.29 350.01 354.07  
358.36 380.53 385.17 388.83 394.93 397.88  
404.37 408.84 417.13 432.03 450.44 451.49  
454.95 456.78 464.73 470.27 473.72 479.84  
485.34 511.76 523.58 526.50 534.55 557.35  
579.29 605.47 611.41 617.32 628.06 641.77  
648.13 667.35 671.58 682.44 720.29 724.96  
728.51 751.29 752.77 782.67 788.32 805.81  
806.28 812.28 813.97 823.10 827.01 833.29  
855.07 868.15 871.02 882.53 892.51 898.29  
900.70 903.10 907.20 909.77 915.46 933.93  
937.51 938.58 941.94 944.58 946.66 947.80  
961.39 962.97 966.24 973.80 974.92 977.54  
991.76 993.08 1017.13 1021.11 1028.69 1038.78  
1042.81 1043.09 1045.28 1046.28 1048.59 1060.81  
1061.47 1068.21 1071.73 1072.21 1086.28 1090.34  
1094.43 1095.93 1102.37 1105.01 1107.13 1119.25  
1125.14 1126.53 1128.82 1131.69 1133.68 1141.21  
1147.01 1177.27 1185.51 1189.75 1190.82 1196.30  
1201.21 1207.28 1210.13 1212.06 1226.18 1227.89  
1241.82 1249.86 1277.37 1287.92 1288.29 1294.89  
1297.73 1301.38 1303.54 1305.93 1306.57 1308.58  
1317.52 1327.79 1338.40 1342.62 1342.78 1355.93  
1356.90 1359.94 1366.97 1367.61 1369.89 1378.71  
1380.09 1381.68 1387.72 1390.06 1392.79 1394.71  
1397.43 1399.08 1400.86 1410.97 1413.84 1414.80

1418.19 1419.81 1421.03 1430.06 1431.28 1432.95  
 1434.49 1436.25 1449.44 1470.34 1484.29 1487.13  
 1488.66 1490.44 1494.77 1496.52 1497.14 1497.20  
 1499.36 1499.68 1499.97 1500.52 1500.88 1501.72  
 1502.70 1503.65 1504.70 1507.91 1508.60 1508.91  
 1510.36 1512.88 1514.90 1515.81 1517.58 1519.67  
 1519.81 1522.32 1524.68 1525.56 1525.75 1527.29  
 1530.68 1569.00 1594.01 1604.49 1606.12 1616.09  
 1656.90 3001.94 3008.57 3009.60 3010.30 3010.94  
 3012.78 3013.11 3016.18 3017.51 3018.19 3021.04  
 3029.05 3032.72 3035.13 3036.67 3038.13 3039.16  
 3045.77 3047.81 3049.18 3052.79 3061.92 3064.14  
 3065.78 3066.39 3069.94 3070.44 3070.95 3071.48  
 3079.96 3083.41 3083.54 3083.98 3086.93 3090.15  
 3090.57 3092.76 3097.97 3099.32 3099.78 3099.94  
 3104.77 3105.12 3111.23 3112.04 3114.13 3123.35  
 3128.93 3130.26 3131.20 3132.09 3132.79 3161.05  
 3172.00 3174.71 3178.52 3181.72 3184.03 3193.84  
 3195.25 3203.84 3222.02

3-TS

-218.47 11.40 29.11 31.50 35.44 39.55  
 43.30 46.37 54.16 58.29 60.78 67.75  
 68.94 74.65 78.50 79.90 92.50 94.28  
 99.43 104.13 107.26 111.73 126.52 129.29  
 134.97 138.26 139.94 147.87 152.14 164.48  
 167.77 174.25 182.59 186.14 195.17 197.26  
 205.92 214.85 221.75 227.89 230.01 235.02  
 243.66 245.45 247.78 251.54 255.54 262.40  
 268.78 271.66 276.72 280.48 288.82 292.12  
 302.49 319.33 327.21 330.77 340.28 351.72  
 359.09 360.95 379.45 387.93 393.04 395.59  
 403.37 419.51 425.02 430.10 432.12 449.83  
 453.14 455.77 459.78 468.17 478.38 478.71  
 482.23 513.07 524.46 527.54 533.75 553.66  
 587.58 606.55 616.04 617.13 625.41 632.67  
 643.22 649.69 669.78 692.93 717.73 733.56  
 737.30 746.20 750.53 781.87 787.47 808.79  
 811.56 811.88 823.82 826.79 833.30 834.92  
 858.17 868.49 869.40 878.76 895.56 901.48  
 902.68 903.81 906.11 911.85 915.88 937.86  
 940.75 942.98 944.14 945.46 947.45 961.15  
 964.22 965.91 973.12 974.06 974.62 979.65  
 985.32 988.54 1000.69 1022.31 1027.28 1036.78  
 1043.48 1044.16 1046.94 1048.63 1050.84 1055.91  
 1063.51 1067.00 1069.98 1071.83 1087.73 1093.71  
 1098.37 1099.12 1104.77 1105.59 1111.61 1116.45  
 1123.98 1127.24 1128.84 1131.36 1133.26 1141.26  
 1144.92 1175.40 1185.37 1188.92 1190.10 1201.83  
 1205.96 1208.34 1210.12 1213.45 1223.77 1228.56  
 1237.83 1248.38 1280.00 1285.75 1289.81 1296.34  
 1297.41 1300.25 1304.57 1306.15 1311.63 1315.37  
 1318.14 1323.07 1341.34 1343.74 1347.79 1348.14  
 1349.57 1359.12 1359.86 1367.63 1369.48 1375.91  
 1379.56 1384.79 1388.77 1392.77 1394.15 1395.02  
 1399.22 1401.02 1402.16 1411.65 1413.12 1415.72  
 1418.74 1419.67 1422.99 1430.47 1432.76 1434.04

1436.04 1436.67 1470.23 1474.26 1485.67 1488.00  
 1490.49 1493.00 1493.45 1494.68 1495.48 1497.60  
 1498.53 1499.21 1500.39 1500.74 1501.69 1502.15  
 1503.62 1503.77 1504.12 1505.66 1507.60 1508.32  
 1511.34 1512.18 1513.43 1515.79 1516.92 1517.79  
 1519.52 1522.36 1523.19 1524.44 1525.49 1528.94  
 1533.90 1594.54 1600.24 1602.86 1606.58 1612.38  
 1653.72 3007.92 3009.17 3009.44 3010.92 3011.46  
 3014.46 3018.32 3027.87 3029.94 3031.23 3032.19  
 3034.85 3036.38 3038.42 3039.13 3040.62 3040.87  
 3045.90 3047.48 3050.48 3054.45 3059.59 3062.60  
 3066.37 3066.63 3070.09 3071.03 3076.19 3079.59  
 3082.55 3085.44 3087.20 3090.00 3091.47 3099.14  
 3100.16 3100.57 3102.43 3107.02 3110.05 3112.18  
 3114.57 3117.28 3119.74 3120.86 3121.82 3128.14  
 3129.88 3133.87 3135.16 3136.38 3140.46 3157.70  
 3160.04 3166.02 3175.38 3180.44 3186.22 3191.76  
 3198.91 3200.37 3203.14

3A

18.57 24.16 32.11 34.93 41.56 48.46  
 49.66 56.90 59.66 64.67 68.07 77.23  
 78.41 85.06 87.43 93.23 96.92 100.04  
 107.22 109.93 112.50 114.51 129.25 132.16  
 138.58 139.50 153.48 156.07 164.75 171.72  
 179.72 181.71 184.05 192.67 197.13 204.64  
 209.78 217.66 223.67 227.81 229.76 244.22  
 246.14 250.14 252.49 259.16 260.25 262.92  
 264.85 272.27 274.66 282.61 289.77 298.11  
 302.41 320.96 325.33 330.88 340.24 348.77  
 352.96 360.50 380.10 384.77 391.44 400.49  
 407.57 417.99 419.61 428.47 449.98 451.60  
 455.91 463.80 470.73 474.03 479.41 483.65  
 488.12 515.35 523.40 530.59 538.52 555.64  
 584.56 606.25 616.97 624.53 631.32 646.82  
 651.45 669.41 669.96 708.77 722.15 728.79  
 745.98 748.90 752.00 783.13 789.10 808.00  
 812.60 816.22 828.82 829.38 832.77 849.44  
 858.40 866.74 872.86 894.51 903.22 903.32  
 906.53 908.73 912.92 914.23 920.10 939.21  
 941.19 944.21 944.52 947.88 948.43 961.13  
 964.11 973.47 975.28 975.47 976.46 989.57  
 989.84 1010.23 1024.14 1028.43 1038.64 1041.61  
 1042.84 1045.81 1047.75 1048.53 1056.17 1067.79  
 1070.59 1071.90 1073.03 1082.63 1090.69 1095.10  
 1099.67 1101.08 1106.40 1107.04 1111.56 1120.02  
 1125.24 1127.49 1129.19 1132.27 1137.28 1142.93  
 1149.35 1174.74 1184.67 1191.55 1191.63 1200.92  
 1210.10 1211.23 1211.54 1216.97 1224.66 1235.25  
 1244.53 1253.67 1281.47 1285.60 1295.63 1297.51  
 1302.15 1306.42 1307.47 1308.46 1314.00 1316.87  
 1321.66 1329.03 1342.81 1343.53 1344.91 1346.82  
 1348.43 1361.10 1362.92 1368.41 1370.43 1377.59  
 1381.25 1386.44 1390.84 1393.81 1395.40 1396.51  
 1400.76 1401.90 1403.41 1413.37 1414.40 1415.88  
 1420.03 1420.61 1425.30 1432.82 1433.17 1434.60  
 1435.59 1438.58 1466.92 1476.98 1485.51 1488.27

1492.38 1494.62 1496.70 1497.69 1498.31 1499.49  
1500.60 1501.19 1501.74 1502.36 1503.61 1503.80  
1504.59 1506.15 1506.86 1507.27 1508.80 1509.45  
1511.42 1513.38 1515.28 1516.63 1517.40 1518.19  
1519.85 1522.41 1523.83 1526.49 1527.55 1529.05  
1532.43 1594.21 1595.43 1610.05 1619.75 1624.35  
1656.89 3007.31 3010.13 3011.58 3012.86 3013.60  
3020.41 3021.57 3029.14 3030.42 3034.05 3034.26  
3036.72 3037.47 3039.89 3040.25 3041.32 3042.45  
3048.02 3048.68 3053.60 3058.51 3066.24 3066.43  
3071.04 3071.95 3072.41 3075.17 3076.91 3084.77  
3088.76 3092.05 3094.57 3095.18 3098.76 3101.20  
3104.61 3106.34 3107.58 3108.38 3112.76 3119.04  
3119.83 3120.76 3126.40 3128.17 3128.70 3131.71  
3137.07 3137.34 3140.21 3144.96 3155.83 3158.91  
3163.01 3171.29 3181.33 3189.32 3191.99 3195.60  
3199.63 3211.25 3218.59

3B

11.07 22.99 28.80 34.58 38.78 44.60  
48.56 51.40 55.53 60.38 62.40 71.20  
82.44 86.41 89.39 93.06 95.14 101.42  
109.97 111.73 113.17 129.83 132.82 136.69  
148.86 154.02 163.78 167.69 169.03 177.18  
182.05 188.80 194.36 196.70 202.24 209.67  
210.41 215.12 218.41 232.40 238.11 242.35  
248.65 255.16 264.35 269.38 273.05 282.04  
288.28 289.32 296.28 300.20 303.85 312.36  
323.69 326.38 336.69 342.46 356.32 360.34  
365.90 374.33 381.48 393.22 397.49 406.93  
416.80 419.63 421.76 437.16 449.87 456.28  
460.82 462.25 478.18 483.15 484.60 488.05  
496.08 514.71 527.24 531.88 536.54 550.00  
581.44 606.09 609.03 618.12 629.88 646.67  
655.32 672.95 677.57 705.32 709.21 716.47  
744.66 748.81 753.95 783.86 791.97 809.90  
811.99 814.87 820.04 826.58 828.86 850.42  
856.92 864.48 870.22 894.39 898.99 900.56  
905.91 911.09 912.15 921.32 922.39 936.72  
940.24 944.73 946.30 947.31 948.94 959.01  
963.09 973.02 974.95 975.62 981.71 982.02  
996.42 1006.30 1022.24 1028.68 1034.36 1036.81  
1041.56 1042.91 1046.51 1046.60 1054.34 1061.20  
1064.40 1067.02 1074.52 1079.49 1087.72 1091.38  
1091.91 1095.93 1102.12 1107.38 1114.27 1114.51  
1121.76 1128.52 1129.17 1132.85 1139.27 1140.25  
1153.98 1176.69 1185.73 1190.19 1193.10 1199.58  
1207.30 1207.75 1208.29 1211.36 1224.87 1233.66  
1244.78 1257.56 1276.25 1279.45 1288.11 1292.45  
1298.69 1300.53 1304.22 1306.80 1317.50 1319.03  
1321.53 1325.59 1335.53 1336.72 1339.63 1346.20  
1347.66 1349.34 1358.47 1365.08 1366.58 1367.38  
1377.30 1382.07 1388.94 1390.23 1394.17 1397.18  
1399.16 1399.71 1403.81 1406.42 1412.28 1414.18  
1418.10 1418.44 1422.41 1434.72 1437.05 1437.38  
1437.60 1439.76 1461.67 1472.74 1483.10 1488.06  
1492.42 1494.03 1496.80 1498.84 1499.01 1500.60

1501.07 1501.16 1502.15 1503.36 1504.25 1504.94  
1505.20 1506.38 1507.43 1507.83 1509.20 1511.54  
1513.40 1514.48 1518.31 1518.67 1519.53 1521.89  
1523.14 1524.33 1528.03 1529.77 1534.12 1536.03  
1537.06 1589.62 1604.43 1606.76 1610.96 1618.59  
1655.65 2997.90 3003.82 3010.08 3015.59 3021.79  
3024.44 3030.56 3031.32 3033.86 3034.81 3035.97  
3039.06 3040.00 3041.07 3041.79 3046.27 3049.41  
3050.48 3059.81 3061.50 3062.90 3064.99 3067.19  
3070.98 3072.30 3073.37 3074.84 3076.67 3080.66  
3089.15 3092.69 3092.89 3096.24 3098.13 3102.90  
3105.01 3105.71 3106.99 3110.55 3115.00 3117.56  
3117.93 3122.02 3122.48 3131.34 3132.12 3137.15  
3146.10 3148.03 3150.41 3157.91 3163.06 3163.22  
3164.31 3169.81 3179.31 3181.92 3192.51 3197.76  
3220.66 3226.91 3268.30

3C

22.38 25.76 27.51 37.64 41.65 49.93  
55.28 63.53 69.06 77.03 78.77 81.22  
90.51 94.43 95.98 99.92 107.62 113.88  
115.58 124.52 126.21 128.05 138.00 141.79  
152.39 154.97 157.30 161.78 167.67 176.71  
178.65 182.30 187.94 190.43 195.83 201.16  
204.64 211.21 214.59 215.76 221.25 225.51  
232.92 237.22 238.15 243.63 251.04 256.65  
262.59 267.51 279.56 287.61 294.92 300.19  
307.53 311.26 321.67 325.34 329.74 331.57  
341.15 343.00 354.30 357.37 358.85 371.39  
379.94 395.22 399.91 401.65 410.48 421.00  
426.16 450.36 456.66 457.74 467.88 470.64  
474.27 482.99 490.10 492.31 498.96 510.81  
530.20 535.16 540.96 549.82 577.34 597.63  
608.38 624.28 627.32 632.12 643.88 650.36  
658.33 662.47 672.52 717.53 719.31 725.05  
736.32 749.76 752.99 779.91 782.42 805.56  
815.48 818.73 823.26 824.85 828.68 852.77  
868.57 870.58 871.31 890.05 900.99 901.66  
905.63 912.32 913.43 914.08 926.38 931.81  
942.33 943.22 945.19 946.78 949.52 951.22  
954.73 964.93 973.86 975.74 976.45 986.76  
999.37 1012.26 1022.46 1029.53 1035.40 1037.33  
1038.31 1041.60 1044.83 1046.64 1055.88 1061.08  
1064.24 1067.18 1072.09 1082.42 1086.62 1087.93  
1093.23 1094.94 1100.80 1107.20 1108.01 1109.87  
1111.48 1118.77 1128.72 1130.23 1137.42 1147.60  
1148.49 1156.68 1166.82 1184.30 1191.01 1191.80  
1194.81 1202.01 1204.96 1213.08 1219.14 1221.86  
1234.11 1254.31 1257.28 1266.32 1273.29 1281.56  
1286.52 1299.01 1302.71 1304.00 1307.28 1310.03  
1310.54 1315.50 1321.54 1331.73 1334.20 1337.85  
1346.22 1350.53 1351.82 1356.46 1365.37 1367.08  
1367.84 1375.31 1381.71 1386.05 1388.47 1391.69  
1393.51 1394.60 1396.42 1401.41 1407.62 1411.14  
1412.08 1414.30 1417.46 1420.10 1430.40 1436.11  
1436.93 1438.05 1439.67 1464.42 1471.23 1482.10  
1484.83 1490.95 1492.03 1493.47 1494.45 1498.05

1498.39 1499.18 1499.56 1501.40 1502.44 1503.71  
1504.63 1505.46 1506.93 1507.66 1509.91 1512.32  
1513.02 1514.13 1514.77 1516.64 1516.77 1520.91  
1521.25 1523.70 1524.41 1528.89 1532.19 1535.56  
1537.91 1538.39 1586.08 1603.67 1612.49 1615.26  
1624.30 1636.06 1658.48 1666.92 3006.88 3008.91  
3010.15 3010.21 3011.68 3021.36 3021.59 3031.23  
3033.20 3034.62 3035.12 3038.83 3040.02 3040.73  
3041.80 3042.41 3043.42 3044.16 3047.61 3062.03  
3065.01 3065.87 3065.99 3069.99 3072.29 3078.30  
3084.59 3091.79 3093.86 3094.22 3097.13 3097.76  
3098.38 3101.61 3103.25 3103.88 3110.90 3114.66  
3115.54 3122.34 3122.61 3123.11 3125.37 3130.09  
3133.68 3134.99 3137.18 3149.24 3151.57 3161.25  
3161.88 3162.01 3163.81 3167.04 3172.04 3190.57  
3193.64 3193.73 3197.12 3220.51 3225.46 3268.48  
3455.25 3584.81 3614.20

3C'

21.31 25.83 28.90 35.06 39.97 43.29  
49.35 51.23 57.35 63.97 68.15 75.18  
77.56 78.79 83.77 87.01 92.50 96.26  
103.43 111.98 113.66 115.59 123.29 125.01  
129.04 139.36 144.06 147.57 151.13 155.74  
156.41 165.16 168.79 177.30 181.54 185.30  
186.38 192.95 199.16 203.26 211.19 216.39  
221.11 222.48 233.43 235.78 243.76 247.74  
255.49 260.88 263.87 271.31 275.82 284.76  
292.56 296.50 299.30 310.28 315.31 320.67  
328.84 331.24 332.89 341.10 344.92 353.93  
357.19 369.76 373.83 387.60 394.51 400.42  
400.94 410.16 416.51 421.06 430.20 436.68  
443.62 452.77 455.88 463.23 468.84 473.35  
478.79 484.28 491.42 499.65 505.08 529.26  
534.32 540.12 542.22 548.53 567.42 574.61  
593.67 610.14 625.24 628.42 630.82 640.29  
647.89 651.69 667.39 673.52 710.23 716.10  
719.90 723.85 726.48 748.84 755.16 758.53  
776.16 783.02 797.36 813.33 818.08 822.52  
823.70 828.85 829.48 847.95 854.75 867.53  
870.69 871.58 888.71 899.74 901.15 905.34  
913.38 914.23 915.63 916.29 925.87 930.19  
940.15 943.16 946.49 948.32 950.71 951.22  
957.46 963.82 971.91 972.51 975.89 976.86  
991.20 996.32 997.79 1002.65 1012.88 1019.98  
1021.32 1029.54 1034.18 1035.30 1039.64 1041.15  
1045.99 1046.75 1054.50 1055.37 1059.17 1062.85  
1066.92 1073.05 1082.76 1087.37 1089.41 1093.40  
1094.93 1099.74 1100.79 1102.99 1106.16 1107.78  
1111.31 1117.31 1127.72 1130.84 1137.83 1146.87  
1156.57 1163.28 1166.91 1183.90 1190.97 1193.04  
1194.15 1195.34 1197.77 1204.79 1213.10 1217.43  
1217.78 1222.19 1232.51 1253.34 1256.86 1262.14  
1268.47 1273.22 1285.35 1289.79 1298.81 1302.39  
1304.04 1306.06 1309.27 1310.40 1315.26 1320.68  
1333.60 1333.91 1337.63 1343.67 1350.29 1354.45  
1357.63 1361.67 1364.85 1367.07 1370.34 1375.14

1378.00 1381.68 1386.75 1388.62 1391.52 1393.50  
1394.48 1396.09 1401.41 1404.59 1405.56 1412.53  
1413.12 1416.86 1418.83 1429.94 1435.78 1436.36  
1437.92 1441.33 1463.53 1471.64 1480.80 1484.36  
1490.65 1492.47 1493.41 1497.02 1497.98 1498.78  
1499.56 1500.63 1501.14 1502.20 1503.64 1504.38  
1506.85 1507.91 1508.12 1510.07 1512.37 1512.92  
1513.42 1514.27 1514.65 1516.71 1518.37 1520.89  
1523.55 1523.87 1528.19 1529.23 1533.50 1535.22  
1538.40 1539.83 1541.51 1585.77 1602.27 1612.62  
1615.66 1622.62 1641.48 1645.92 1659.09 1660.16  
2987.41 3006.83 3009.53 3010.43 3011.15 3021.79  
3022.21 3022.25 3028.70 3031.41 3034.80 3034.94  
3037.22 3038.48 3039.00 3040.28 3043.56 3044.56  
3045.70 3061.91 3065.68 3065.77 3066.59 3069.72  
3072.71 3078.21 3084.19 3089.35 3089.87 3092.00  
3093.27 3093.48 3096.45 3096.93 3098.26 3101.46  
3101.54 3102.28 3113.02 3113.45 3116.73 3122.64  
3125.41 3125.83 3134.16 3135.20 3135.27 3153.97  
3157.82 3159.34 3160.08 3164.43 3165.61 3165.78  
3166.92 3167.97 3176.77 3184.71 3186.47 3186.95  
3187.51 3191.03 3193.30 3194.27 3233.72 3237.56  
3267.86 3479.84 3598.58

3D

11.18 17.12 22.35 22.81 25.33 26.48  
30.06 32.87 34.30 39.72 40.88 43.61  
45.69 46.86 48.99 51.40 55.01 57.95  
63.65 66.03 70.82 72.45 73.10 75.91  
78.84 81.01 82.92 84.19 87.43 91.55  
94.00 95.80 98.59 103.99 107.40 109.33  
110.31 113.40 116.22 118.74 121.64 126.31  
134.62 142.97 146.14 148.40 149.56 150.43  
152.61 154.00 159.30 160.11 164.43 169.57  
174.69 180.15 180.94 187.28 189.50 192.42  
197.76 203.40 205.72 210.51 212.48 214.10  
218.87 219.49 220.22 222.85 226.76 230.54  
233.88 235.14 236.86 238.20 239.04 252.23  
252.93 255.06 256.34 256.65 258.57 258.96  
260.30 262.94 266.43 270.40 272.65 277.32  
286.50 295.68 298.87 302.52 304.17 307.20  
308.10 309.10 309.52 311.05 311.88 317.09  
320.76 321.68 327.11 330.06 332.07 333.41  
337.24 344.61 349.28 355.16 361.64 363.52  
365.15 365.96 368.13 369.74 371.37 372.01  
374.57 386.26 394.40 398.29 398.50 405.79  
410.13 418.49 426.61 445.02 447.94 452.69  
454.17 455.50 455.70 458.23 460.38 466.29  
472.02 475.11 481.93 488.17 492.98 495.94  
496.90 497.34 499.26 499.66 501.48 502.74  
504.30 507.11 518.35 534.80 540.02 543.44  
561.22 578.46 609.78 612.22 616.65 626.29  
632.36 645.70 647.76 662.26 668.23 702.02  
715.76 721.31 723.70 747.85 748.17 749.86  
750.59 754.75 755.48 757.17 780.10 795.64  
809.94 816.26 819.00 823.03 828.25 841.46  
867.23 870.36 871.83 883.78 886.63 887.71



888.16 888.46 888.64 888.88 890.64 894.65  
898.97 901.74 905.68 910.29 912.37 914.98  
918.57 929.87 937.21 943.50 946.21 947.81  
948.17 948.58 949.16 949.97 950.97 952.58  
955.79 960.46 964.20 975.74 978.01 990.49  
1000.25 1003.44 1005.00 1006.06 1011.32 1015.28  
1019.96 1027.18 1028.11 1032.80 1035.54 1040.58  
1042.51 1042.98 1043.50 1043.86 1044.05 1044.34  
1044.61 1045.72 1047.65 1052.04 1054.11 1057.05  
1061.59 1065.47 1072.30 1080.81 1083.68 1087.31  
1089.92 1093.58 1095.43 1102.48 1108.14 1109.06  
1111.76 1112.59 1126.60 1130.61 1137.96 1145.78  
1155.19 1157.89 1179.12 1181.80 1187.16 1191.42  
1191.55 1193.32 1205.84 1213.46 1214.43 1221.59  
1227.19 1234.67 1236.20 1236.68 1237.59 1238.39  
1239.90 1240.26 1240.77 1241.31 1242.90 1247.49  
1251.80 1253.96 1255.28 1259.44 1261.63 1277.91  
1286.47 1291.09 1298.84 1301.66 1304.86 1307.74  
1309.85 1312.50 1321.71 1334.14 1334.84 1337.96  
1340.87 1349.86 1353.57 1357.52 1364.90 1365.99  
1367.85 1375.67 1382.09 1382.93 1389.43 1389.64  
1391.09 1391.64 1392.69 1392.74 1393.07 1393.71  
1394.51 1395.02 1395.85 1395.92 1397.22 1397.60  
1398.18 1401.38 1411.79 1412.45 1414.07 1417.24  
1418.03 1419.10 1421.22 1423.13 1428.66 1434.11  
1434.60 1435.86 1436.92 1464.56 1464.89 1478.61  
1482.98 1483.61 1484.13 1484.84 1485.77 1486.16  
1486.45 1487.32 1488.78 1489.64 1489.77 1489.92  
1490.16 1492.35 1492.67 1492.91 1496.30 1497.51  
1498.36 1498.82 1500.12 1500.58 1502.25 1502.73  
1503.13 1505.33 1505.85 1506.22 1506.89 1507.27  
1507.82 1508.01 1508.25 1508.65 1508.91 1509.58  
1510.38 1512.17 1512.57 1513.47 1514.42 1516.72  
1516.94 1518.23 1519.38 1519.84 1520.29 1522.44  
1523.19 1524.27 1529.05 1529.74 1531.63 1534.80  
1536.98 1537.94 1577.74 1596.01 1603.40 1614.31  
1622.42 1653.08 1654.94 1655.86 2997.84 3001.55  
3002.61 3003.65 3004.79 3005.63 3005.98 3006.05  
3006.09 3007.37 3009.68 3011.09 3011.47 3015.18  
3015.47 3016.81 3017.53 3020.55 3028.12 3030.00  
3030.93 3036.11 3038.09 3038.65 3039.44 3040.64  
3040.98 3042.47 3044.62 3045.10 3049.03 3062.38  
3063.15 3064.68 3064.88 3067.97 3068.10 3068.48  
3068.58 3069.24 3070.36 3072.32 3073.44 3073.74  
3073.99 3074.92 3075.65 3077.79 3078.64 3082.58  
3084.57 3086.83 3088.76 3088.98 3089.99 3090.17  
3090.22 3091.08 3093.34 3093.59 3095.01 3095.49  
3097.38 3098.61 3099.44 3100.01 3101.03 3102.06  
3102.43 3105.76 3106.48 3111.87 3113.75 3115.04  
3115.55 3116.65 3121.24 3126.62 3127.99 3133.55  
3133.76 3135.12 3142.62 3155.44 3158.52 3162.21  
3164.56 3166.95 3171.16 3174.82 3180.83 3187.67  
3189.62 3193.43 3205.24 3224.19 3241.48 3270.78  
3465.35 3594.32 3611.20

=====  
3D'  
=====

10.10 14.99 16.92 18.28 22.36 23.49

26.12 32.96 34.93 36.29 38.09 40.82  
42.46 43.92 46.38 48.06 53.53 56.82  
57.10 60.11 64.39 69.00 70.22 75.77  
76.53 79.42 81.14 83.83 84.52 86.62  
88.99 92.98 96.00 97.16 99.53 104.11  
106.54 110.31 111.26 113.87 116.98 120.94  
122.67 127.37 134.20 136.08 140.25 144.99  
147.94 150.90 152.66 155.69 156.35 159.74  
160.63 168.07 170.56 177.90 178.05 183.72  
185.29 189.56 193.62 196.61 197.69 201.54  
209.25 211.34 217.66 219.73 220.55 222.59  
224.59 231.79 232.83 236.79 237.16 239.87  
241.66 246.93 248.94 253.79 256.43 258.56  
260.09 262.61 263.10 264.22 265.73 269.10  
271.43 274.60 277.20 283.41 292.50 297.80  
302.03 302.53 309.88 310.20 311.01 313.67  
315.02 315.20 320.01 323.54 333.27 336.15  
340.90 341.56 350.26 353.26 355.64 357.82  
361.08 362.82 365.21 365.62 367.94 369.00  
372.36 374.05 376.51 378.21 382.36 384.75  
396.42 398.30 401.35 404.39 411.46 416.49  
418.54 429.43 445.08 447.39 454.48 455.25  
456.26 457.54 459.12 460.65 464.21 473.53  
478.63 483.29 490.27 490.99 494.56 494.74  
498.28 498.71 499.62 500.69 501.74 503.58  
508.23 517.52 535.83 539.94 542.48 548.74  
561.19 563.89 580.11 608.98 615.77 624.51  
625.34 631.52 639.17 647.99 667.67 668.52  
698.69 703.17 715.99 721.27 722.67 744.41  
747.17 748.88 752.40 752.87 754.48 757.80  
765.95 779.94 797.63 812.36 818.73 821.88  
826.42 826.92 827.95 836.61 839.80 866.86  
870.90 872.79 878.98 886.74 887.11 888.95  
889.12 890.57 891.00 891.32 892.23 899.43  
900.22 903.44 906.94 908.22 912.74 915.66  
919.40 933.02 937.89 944.76 947.82 948.55  
949.86 950.30 951.36 951.71 952.40 954.54  
954.71 959.64 964.87 967.79 974.89 979.13  
985.13 992.45 997.13 998.32 1004.93 1006.06  
1008.46 1012.32 1014.13 1020.63 1021.96 1027.49  
1028.83 1033.07 1038.90 1041.12 1041.66 1042.03  
1042.32 1043.00 1044.12 1044.89 1046.10 1046.63  
1049.87 1050.35 1055.83 1058.86 1061.04 1062.93  
1066.92 1073.47 1083.33 1086.90 1089.27 1093.47  
1094.59 1098.87 1101.96 1104.43 1108.60 1109.89  
1112.11 1113.78 1127.47 1132.55 1138.93 1147.01  
1155.87 1158.72 1161.88 1182.87 1190.82 1191.22  
1194.35 1195.77 1196.15 1206.31 1213.38 1215.93  
1221.81 1223.79 1229.97 1234.00 1237.04 1237.65  
1239.35 1239.64 1240.85 1240.98 1241.72 1242.85  
1244.79 1244.95 1252.39 1255.05 1259.18 1259.48  
1265.24 1270.22 1286.13 1292.48 1299.05 1299.60  
1302.53 1305.36 1309.54 1310.49 1311.89 1320.90  
1334.47 1335.64 1337.99 1338.81 1348.48 1352.38  
1357.76 1365.28 1367.49 1367.78 1370.05 1376.76  
1379.05 1380.77 1381.96 1382.60 1390.28 1390.65  
1392.57 1393.05 1393.16 1393.34 1393.83 1394.26  
1394.53 1395.08 1396.45 1397.54 1400.14 1400.61

1401.49 1412.61 1414.12 1415.65 1416.03 1418.63  
 1418.97 1421.68 1424.50 1429.73 1435.15 1435.67  
 1435.77 1439.58 1463.90 1465.57 1480.60 1482.63  
 1484.29 1485.24 1485.69 1486.31 1486.61 1487.55  
 1488.29 1489.82 1490.05 1490.51 1492.17 1493.05  
 1493.58 1496.21 1497.84 1498.38 1499.65 1500.71  
 1500.79 1501.80 1502.92 1504.19 1505.50 1505.89  
 1506.30 1506.70 1507.04 1507.33 1507.61 1508.52  
 1508.83 1509.30 1510.11 1511.08 1512.00 1512.33  
 1513.32 1513.70 1514.51 1516.53 1517.15 1518.34  
 1519.65 1519.79 1520.81 1521.61 1522.62 1523.56  
 1525.01 1529.27 1531.49 1533.29 1535.88 1537.26  
 1540.14 1541.20 1547.29 1582.16 1598.54 1612.12  
 1615.46 1621.10 1651.92 1656.03 1661.72 1669.57  
 2990.21 2997.86 3000.88 3004.54 3005.28 3006.75  
 3007.31 3008.09 3009.64 3011.00 3011.30 3011.80  
 3013.13 3014.03 3018.07 3022.35 3029.19 3031.93  
 3033.05 3034.26 3035.43 3037.40 3037.52 3037.93  
 3039.33 3039.47 3039.96 3042.94 3043.98 3045.40  
 3045.67 3057.77 3061.63 3062.83 3066.12 3067.21  
 3069.19 3069.99 3070.32 3071.64 3072.96 3073.42  
 3075.05 3076.46 3077.06 3077.22 3078.95 3081.93  
 3083.59 3085.43 3085.78 3087.66 3088.03 3089.35  
 3090.49 3092.05 3092.85 3095.60 3097.15 3097.36  
 3098.95 3099.94 3101.28 3101.50 3103.69 3106.92  
 3107.54 3109.11 3109.88 3111.88 3113.94 3115.86  
 3118.38 3123.90 3124.58 3125.07 3125.98 3126.56  
 3127.88 3132.40 3135.03 3139.88 3140.83 3152.38  
 3160.24 3164.89 3165.02 3166.47 3170.02 3170.73  
 3179.75 3183.71 3188.68 3189.18 3190.58 3200.29  
 3201.56 3205.52 3206.98 3226.24 3233.84 3250.85  
 3272.82 3469.16 3566.18

=====  
 3D-TS  
 =====

-325.17 16.66 20.45 28.89 30.81 31.65  
 34.72 35.59 37.42 44.40 46.62 47.61  
 50.80 50.87 56.29 57.52 59.95 63.64  
 64.73 65.29 67.15 70.54 72.05 76.10  
 77.85 80.02 81.69 82.89 85.90 89.45  
 90.25 94.74 97.65 100.61 102.81 103.01  
 110.64 112.16 115.61 121.08 127.07 128.91  
 131.17 137.38 141.25 143.20 147.30 148.69  
 156.81 158.97 160.07 165.13 166.94 168.47  
 175.66 180.47 181.14 184.86 187.27 192.84  
 194.23 196.00 203.16 204.81 208.41 213.26  
 216.29 221.24 226.15 231.61 232.20 234.29  
 240.17 241.48 242.70 248.08 249.89 252.61  
 256.29 258.13 258.35 260.20 263.31 264.44  
 267.41 269.69 272.58 277.58 279.15 284.13  
 287.65 291.99 293.07 295.87 300.39 307.72  
 309.47 310.67 310.75 314.83 317.87 318.68  
 323.24 324.36 326.76 331.86 338.81 339.54  
 345.31 350.37 354.59 357.58 364.03 365.76  
 368.27 369.56 370.48 372.04 375.24 376.77  
 389.09 391.11 397.86 403.08 407.12 416.60  
 420.61 434.72 444.60 450.33 452.04 454.55  
 456.70 458.47 462.01 470.80 472.36 473.99

478.10 483.82 487.00 488.51 491.26 492.80  
 493.97 495.17 499.19 500.22 501.63 506.81  
 521.57 533.50 534.53 535.77 543.35 549.68  
 579.28 606.73 610.04 628.92 632.35 643.74  
 660.25 662.20 675.28 717.01 725.23 730.47  
 736.60 743.02 747.28 747.69 748.99 751.92  
 753.01 785.77 792.51 808.56 815.94 820.57  
 825.32 827.39 832.12 837.76 854.38 869.31  
 870.57 871.51 877.57 884.36 886.91 887.28  
 888.76 889.06 892.34 892.85 894.35 901.38  
 901.64 904.92 912.05 914.14 914.49 915.80  
 922.86 933.45 934.86 943.02 944.57 948.04  
 948.29 948.86 949.35 950.01 952.45 953.89  
 962.10 966.01 973.92 974.47 975.25 976.63  
 981.28 991.73 997.34 998.65 1003.65 1008.30  
 1016.11 1023.54 1028.78 1034.89 1038.51 1039.79  
 1040.79 1041.18 1041.20 1042.14 1043.02 1044.82  
 1045.01 1045.23 1047.90 1052.96 1055.69 1058.60  
 1060.96 1065.56 1068.64 1072.84 1081.53 1086.06  
 1087.62 1091.80 1100.05 1101.64 1107.26 1108.11  
 1109.83 1117.41 1125.00 1127.78 1132.42 1134.11  
 1146.95 1156.24 1170.29 1183.94 1189.82 1190.28  
 1198.87 1203.43 1204.61 1211.50 1219.92 1225.02  
 1228.63 1234.05 1236.09 1238.63 1239.09 1240.98  
 1241.63 1243.44 1245.60 1247.76 1252.42 1255.55  
 1258.01 1262.43 1267.17 1268.25 1277.70 1283.94  
 1288.72 1298.82 1302.46 1302.89 1303.89 1307.81  
 1309.24 1314.80 1318.89 1334.08 1336.72 1337.00  
 1344.18 1352.58 1354.24 1359.71 1365.79 1367.05  
 1367.91 1375.73 1381.13 1387.18 1387.55 1388.67  
 1389.38 1389.54 1390.35 1390.92 1392.51 1393.65  
 1393.89 1395.13 1396.92 1398.47 1400.56 1401.33  
 1403.33 1407.60 1411.81 1412.42 1412.95 1414.32  
 1416.57 1418.01 1420.66 1425.70 1430.52 1432.97  
 1434.19 1435.11 1437.47 1439.21 1462.98 1466.98  
 1480.54 1481.80 1485.22 1485.29 1485.52 1486.10  
 1487.74 1490.11 1490.36 1491.19 1492.42 1493.14  
 1495.20 1496.68 1498.00 1498.23 1498.27 1498.93  
 1499.27 1500.62 1501.34 1501.93 1502.12 1502.68  
 1503.94 1504.44 1505.17 1505.47 1506.79 1506.90  
 1509.24 1509.76 1509.80 1511.59 1512.15 1512.25  
 1513.29 1513.46 1514.16 1514.42 1514.66 1515.26  
 1517.11 1517.52 1519.74 1521.62 1521.86 1522.72  
 1523.96 1527.09 1528.23 1530.02 1532.22 1532.75  
 1534.44 1536.79 1541.41 1583.80 1595.51 1605.34  
 1609.66 1615.29 1624.51 1644.90 1783.26 2997.48  
 3002.52 3006.65 3007.27 3007.49 3009.10 3010.55  
 3011.49 3011.73 3014.20 3017.84 3020.84 3022.44  
 3024.99 3025.84 3028.36 3028.74 3030.64 3032.12  
 3032.68 3037.47 3037.94 3038.08 3038.13 3039.37  
 3040.84 3040.87 3042.12 3044.39 3044.51 3046.55  
 3059.98 3061.87 3063.84 3065.42 3065.59 3065.78  
 3068.55 3070.92 3071.64 3075.59 3076.73 3077.12  
 3083.05 3083.32 3083.62 3084.54 3087.13 3090.37  
 3091.06 3093.04 3093.16 3095.44 3096.25 3096.80  
 3098.32 3098.92 3099.23 3099.89 3100.06 3102.77  
 3103.82 3104.02 3106.38 3106.60 3108.01 3113.06  
 3113.77 3115.51 3115.53 3116.86 3119.95 3120.21

3125.13 3127.62 3130.38 3131.56 3133.92 3136.43  
3136.77 3141.17 3141.67 3148.91 3154.56 3155.76  
3157.49 3158.71 3161.78 3162.71 3166.25 3178.71  
3185.78 3191.05 3194.07 3202.78 3206.12 3212.90  
3271.73 3456.22 3557.10

=====  
3D'-TS  
=====

-599.44 12.49 21.52 23.86 25.36 26.52  
28.74 31.13 34.00 36.28 38.50 41.55  
43.31 46.68 48.67 51.54 53.49 57.60  
61.97 66.18 69.12 72.04 73.75 74.84  
78.74 79.79 83.05 84.00 85.78 87.71  
92.10 93.67 96.24 97.49 100.37 102.28  
104.07 108.23 110.84 113.83 116.12 117.16  
117.53 124.25 128.22 128.46 135.43 137.44  
139.22 143.05 151.52 153.35 156.72 160.19  
162.68 165.43 167.79 172.26 175.33 177.47  
181.96 184.45 191.62 194.98 197.20 204.50  
206.35 206.75 212.52 213.18 217.07 222.45  
222.79 231.62 232.26 234.93 238.67 241.66  
247.26 248.12 250.16 251.21 253.70 256.39  
258.57 259.22 260.50 260.83 263.67 267.65  
270.76 275.74 277.98 284.49 285.02 289.78  
292.93 298.75 303.67 304.64 305.22 308.63  
310.25 312.06 313.06 314.94 315.30 317.54  
323.27 328.14 331.37 335.46 339.92 348.33  
354.02 364.00 365.30 367.22 368.36 371.44  
371.52 371.98 379.03 379.43 382.66 390.34  
395.58 397.45 403.99 406.93 417.79 426.23  
437.89 439.17 447.19 455.84 457.11 458.93  
460.72 465.07 467.94 469.03 474.74 476.62  
478.25 488.31 489.90 493.82 497.31 498.39  
498.73 500.38 501.19 503.44 504.81 507.53  
516.25 535.60 537.72 542.26 554.07 557.34  
578.72 582.16 607.63 613.06 629.34 632.11  
632.71 644.85 655.21 669.72 671.92 704.02  
712.97 719.12 725.00 725.82 732.58 746.58  
753.20 753.74 754.01 755.14 773.25 785.03  
788.31 789.27 808.45 809.73 816.15 821.27  
823.56 827.42 835.75 846.10 856.24 859.85  
866.19 870.64 872.48 886.57 891.29 892.96  
893.71 894.08 895.90 897.72 902.94 905.66  
905.89 909.53 910.73 912.53 916.19 921.86  
924.37 931.46 935.42 942.22 945.65 946.22  
948.07 949.00 950.76 951.79 952.74 957.89  
962.61 965.34 966.68 971.01 972.08 975.00  
975.89 977.34 989.61 993.03 995.68 999.16  
1002.38 1009.23 1011.81 1016.56 1024.42 1029.11  
1035.14 1040.06 1040.25 1042.28 1043.31 1043.89  
1044.40 1044.51 1044.90 1046.34 1046.98 1050.34  
1050.54 1054.96 1056.15 1061.10 1062.57 1065.22  
1067.36 1072.65 1086.03 1086.79 1089.27 1092.55  
1101.60 1104.51 1106.62 1109.22 1110.02 1112.05  
1119.17 1122.86 1128.89 1131.82 1138.74 1145.44  
1156.52 1175.12 1183.45 1190.44 1191.38 1193.03  
1201.58 1202.72 1205.83 1209.97 1210.83 1218.18  
1222.29 1225.59 1232.84 1235.72 1235.97 1238.23

1241.02 1242.64 1243.14 1244.58 1244.88 1246.19  
1251.97 1253.67 1255.43 1256.33 1258.07 1270.41  
1281.63 1282.41 1288.08 1292.92 1298.26 1302.03  
1305.90 1309.45 1310.67 1313.96 1317.43 1318.74  
1334.74 1336.16 1345.27 1349.99 1352.52 1355.64  
1355.88 1361.44 1365.45 1366.50 1368.62 1376.05  
1378.36 1381.00 1387.21 1389.13 1391.22 1393.40  
1394.28 1395.21 1395.64 1396.55 1396.83 1397.70  
1397.99 1398.48 1398.74 1404.81 1408.76 1410.84  
1411.97 1412.65 1418.59 1418.89 1420.25 1422.75  
1422.84 1423.44 1431.20 1431.43 1433.99 1436.02  
1441.51 1442.75 1466.68 1470.72 1477.25 1483.91  
1484.64 1485.11 1485.35 1486.25 1487.38 1488.31  
1488.58 1489.12 1489.63 1490.00 1491.27 1492.51  
1492.71 1493.85 1495.99 1496.24 1498.03 1498.12  
1498.40 1499.21 1501.42 1501.62 1502.09 1502.80  
1503.93 1504.46 1505.76 1507.10 1507.69 1507.96  
1508.89 1510.20 1510.39 1510.92 1512.29 1512.36  
1513.17 1513.49 1514.19 1515.12 1515.62 1516.20  
1517.22 1518.64 1519.59 1520.30 1520.67 1522.26  
1524.16 1525.52 1525.80 1530.29 1530.96 1532.83  
1533.18 1534.59 1537.49 1537.89 1583.47 1609.48  
1613.45 1619.69 1622.72 1624.52 1653.14 1665.79  
1704.07 2992.07 3006.18 3006.47 3008.63 3009.38  
3009.39 3010.55 3010.65 3011.37 3011.55 3014.02  
3018.07 3020.61 3021.03 3021.59 3029.92 3030.90  
3031.59 3036.87 3037.08 3039.61 3040.03 3040.71  
3042.16 3042.37 3042.88 3044.50 3045.07 3045.84  
3047.51 3057.97 3060.35 3066.01 3066.71 3068.75  
3071.19 3072.79 3073.68 3075.45 3076.26 3078.13  
3078.58 3080.08 3080.18 3081.09 3082.97 3083.76  
3085.43 3086.21 3088.06 3088.19 3090.06 3091.20  
3091.97 3092.73 3095.37 3096.28 3097.35 3099.93  
3100.28 3101.03 3102.64 3103.59 3107.07 3109.48  
3111.88 3112.12 3112.83 3115.78 3116.18 3116.95  
3121.44 3124.06 3125.09 3126.03 3127.45 3130.58  
3132.65 3133.62 3134.34 3140.76 3157.54 3158.27  
3158.74 3165.41 3166.09 3168.03 3169.84 3170.02  
3175.34 3178.00 3179.32 3182.44 3185.85 3189.07  
3191.87 3200.07 3215.06 3217.44 3237.82 3245.09  
3252.49 3262.57 3507.33

=====  
3E  
=====

10.12 10.88 17.16 28.51 30.03 31.95  
35.13 36.54 41.71 43.63 45.84 49.09  
51.12 51.83 54.03 57.08 60.28 61.64  
62.70 65.41 65.98 70.68 73.80 74.65  
76.81 81.01 81.57 84.30 88.11 90.76  
91.15 95.10 98.59 101.06 103.64 107.82  
113.18 115.08 120.24 121.10 124.89 128.60  
129.75 139.50 142.24 146.52 150.16 154.39  
155.44 158.66 160.77 164.63 168.52 173.31  
178.45 180.80 184.20 188.06 191.29 194.74  
196.69 199.18 204.37 207.01 211.55 216.10  
218.80 221.65 226.75 227.74 232.47 233.88  
238.27 239.64 241.70 250.03 252.46 253.47  
254.17 255.37 258.26 260.28 261.32 264.04

268.54 270.71 276.67 277.34 284.22 287.24  
 288.30 292.50 297.05 299.42 301.00 307.22  
 308.31 309.25 311.44 317.63 318.12 319.50  
 320.36 323.88 327.07 331.42 337.77 340.79  
 342.95 350.97 358.09 364.51 366.76 367.66  
 368.17 369.25 370.43 373.23 376.63 377.79  
 391.51 394.49 398.87 401.89 406.63 421.34  
 428.04 434.70 440.69 449.07 450.35 453.07  
 454.12 458.64 460.84 469.49 471.36 473.97  
 476.46 479.23 482.39 486.86 489.98 492.15  
 493.65 495.19 498.64 499.09 501.53 506.62  
 519.70 524.46 532.49 533.30 545.77 549.04  
 577.03 603.67 609.33 627.92 632.14 642.04  
 659.25 661.46 673.05 716.63 723.32 729.86  
 737.08 745.81 747.64 747.98 750.45 752.08  
 760.50 784.80 790.72 807.68 815.83 819.78  
 825.04 827.87 831.43 851.96 858.26 861.09  
 870.60 871.79 873.01 882.18 883.25 885.40  
 888.49 891.17 892.38 892.90 900.54 900.95  
 905.36 910.83 914.76 914.89 921.01 928.62  
 933.07 934.03 942.02 945.31 946.13 946.62  
 948.10 948.96 949.23 949.34 951.65 951.94  
 960.25 972.18 973.53 974.97 975.38 977.86  
 986.75 993.42 1000.63 1003.73 1008.56 1015.72  
 1023.14 1028.50 1034.58 1037.66 1039.01 1039.55  
 1040.61 1040.77 1041.07 1042.56 1044.55 1044.85  
 1045.26 1046.91 1048.49 1055.61 1061.14 1061.39  
 1065.29 1069.38 1072.82 1074.28 1081.03 1085.88  
 1087.24 1092.61 1100.32 1101.99 1106.99 1107.81  
 1110.23 1117.33 1124.26 1125.48 1133.25 1135.18  
 1146.84 1155.76 1169.32 1183.98 1188.28 1190.22  
 1197.80 1203.19 1204.41 1211.72 1219.26 1226.04  
 1230.01 1233.19 1235.49 1236.17 1236.34 1239.43  
 1240.37 1243.72 1244.08 1244.79 1251.92 1253.12  
 1254.55 1261.33 1267.32 1269.94 1273.93 1284.10  
 1289.70 1298.90 1302.48 1303.10 1304.52 1307.44  
 1308.09 1313.46 1319.28 1333.77 1335.59 1336.63  
 1342.72 1352.91 1356.32 1360.44 1365.75 1367.53  
 1368.28 1375.29 1382.41 1385.28 1387.35 1388.34  
 1389.00 1390.01 1390.77 1392.18 1392.73 1392.91  
 1393.87 1395.53 1398.06 1398.16 1400.43 1407.40  
 1411.40 1411.56 1412.42 1412.85 1414.14 1415.94  
 1416.81 1420.61 1423.01 1433.80 1434.38 1435.05  
 1435.52 1437.45 1441.12 1462.86 1465.60 1481.50  
 1483.43 1485.21 1485.77 1486.34 1487.22 1488.10  
 1488.85 1489.32 1490.38 1492.48 1493.12 1495.33  
 1496.53 1497.14 1497.78 1498.23 1498.48 1498.80  
 1499.20 1500.44 1500.77 1501.84 1502.13 1502.77  
 1503.05 1504.16 1504.83 1505.35 1506.80 1507.25  
 1508.54 1509.12 1509.59 1511.22 1511.56 1512.01  
 1512.94 1513.93 1514.00 1514.82 1515.32 1516.61  
 1519.20 1519.81 1520.95 1521.59 1522.93 1524.10  
 1527.15 1528.33 1529.85 1530.64 1531.82 1532.35  
 1533.44 1537.15 1543.17 1583.78 1594.62 1601.88  
 1609.72 1614.40 1625.14 1645.93 2598.86 2994.26  
 2996.71 3002.89 3004.11 3006.76 3008.02 3008.34  
 3009.37 3011.66 3014.70 3020.65 3022.12 3024.70  
 3026.72 3027.78 3028.11 3028.36 3031.05 3032.69

3033.46 3035.64 3037.39 3037.70 3038.17 3038.33  
 3039.20 3040.84 3043.79 3044.71 3045.55 3046.56  
 3059.52 3061.76 3063.83 3064.62 3065.33 3065.60  
 3068.23 3069.83 3070.76 3070.89 3071.50 3075.86  
 3079.43 3083.54 3084.38 3086.65 3090.59 3091.21  
 3091.51 3091.53 3093.20 3094.61 3095.37 3095.74  
 3098.36 3098.72 3099.66 3102.85 3103.65 3104.24  
 3104.73 3107.36 3107.73 3111.32 3112.75 3112.88  
 3113.91 3115.24 3115.47 3116.48 3119.07 3120.90  
 3121.57 3128.39 3133.72 3134.80 3136.09 3140.60  
 3145.59 3148.49 3150.71 3152.61 3154.82 3158.85  
 3160.03 3160.23 3161.05 3161.44 3172.31 3183.76  
 3190.75 3191.38 3195.71 3200.06 3203.60 3214.82  
 3272.21 3445.54 3543.19

3E'

10.04 15.95 18.53 21.56 23.54 25.91  
 29.19 31.66 33.46 34.72 36.60 40.30  
 42.81 44.95 49.91 53.53 54.93 59.16  
 60.69 67.55 69.02 69.64 73.12 73.57  
 77.18 79.27 80.51 85.66 86.50 88.34  
 90.25 92.88 94.09 95.76 98.39 100.74  
 103.78 107.44 108.74 114.07 116.27 118.17  
 121.69 124.10 127.56 130.21 133.46 135.82  
 139.20 148.73 152.03 153.27 156.45 158.34  
 161.14 164.88 169.05 170.14 172.05 175.15  
 183.53 186.92 191.20 192.86 196.70 202.28  
 207.04 210.13 212.22 218.41 220.44 226.29  
 227.82 230.80 233.68 234.71 236.93 240.30  
 243.75 244.18 248.52 248.98 249.69 250.72  
 253.29 254.10 256.90 259.75 261.26 267.42  
 271.47 272.78 276.40 283.80 285.72 290.22  
 295.81 300.72 301.58 303.40 306.36 306.76  
 308.84 310.08 315.19 317.91 319.06 322.77  
 324.88 327.94 332.62 340.15 349.63 355.50  
 363.19 364.49 366.43 368.33 369.83 370.21  
 373.20 373.24 375.31 377.23 384.73 395.21  
 396.63 405.03 405.77 418.07 425.90 431.17  
 437.38 447.85 450.33 454.62 456.45 456.70  
 459.32 461.87 463.57 469.86 472.18 474.77  
 475.71 487.48 490.02 491.89 496.11 497.91  
 499.99 501.14 502.41 504.96 506.97 513.14  
 515.83 534.96 536.76 541.38 553.37 565.06  
 582.12 584.51 605.75 609.94 629.48 631.87  
 635.13 642.92 656.62 668.51 670.73 715.48  
 715.83 723.97 724.90 732.84 748.14 749.47  
 751.54 751.83 752.21 753.01 777.12 783.82  
 787.33 790.28 807.80 815.44 820.66 824.24  
 828.34 833.09 842.26 851.57 855.45 863.84  
 869.76 872.96 884.74 890.85 891.72 892.60  
 894.02 895.13 896.08 901.89 902.57 904.98  
 905.51 912.47 914.33 915.96 921.34 924.85  
 927.48 934.93 937.52 942.82 944.13 946.22  
 948.80 949.60 949.99 950.74 956.58 959.94  
 962.21 969.32 969.99 972.10 972.53 973.10  
 975.17 986.80 989.78 991.95 994.62 1000.34  
 1007.11 1010.16 1016.54 1023.82 1029.51 1035.28

1039.93 1040.25 1040.69 1041.80 1042.80 1043.60  
 1043.77 1045.41 1046.22 1046.60 1050.05 1050.73  
 1055.00 1055.72 1061.82 1062.34 1066.37 1068.25  
 1072.26 1084.60 1085.85 1087.51 1093.84 1098.23  
 1102.25 1106.54 1108.30 1109.93 1110.36 1120.87  
 1122.15 1127.81 1131.51 1138.18 1146.44 1157.15  
 1174.20 1183.31 1184.23 1189.03 1190.52 1191.13  
 1200.69 1202.13 1204.74 1210.36 1211.80 1217.02  
 1218.23 1224.55 1230.46 1234.71 1235.08 1239.39  
 1242.15 1242.47 1243.77 1244.06 1247.19 1248.25  
 1252.54 1254.38 1257.09 1258.01 1265.99 1268.40  
 1281.33 1286.50 1287.36 1291.48 1298.12 1302.95  
 1305.31 1307.22 1309.73 1314.75 1315.98 1319.18  
 1335.20 1337.31 1346.92 1350.76 1351.93 1352.97  
 1355.99 1360.76 1365.47 1367.90 1368.27 1375.14  
 1380.69 1384.76 1387.77 1388.63 1391.17 1393.58  
 1393.64 1393.82 1394.93 1396.02 1396.55 1397.21  
 1398.19 1398.93 1400.57 1401.13 1409.45 1410.26  
 1411.83 1415.95 1417.18 1420.01 1420.46 1421.71  
 1422.63 1424.90 1431.14 1431.52 1433.88 1436.92  
 1441.94 1443.82 1464.67 1475.69 1482.08 1483.97  
 1485.22 1485.84 1486.27 1486.94 1487.78 1488.35  
 1488.91 1489.52 1490.33 1490.60 1491.24 1492.59  
 1492.85 1494.25 1495.35 1497.46 1498.05 1498.63  
 1498.94 1499.64 1501.01 1501.53 1501.65 1502.39  
 1503.24 1504.53 1505.04 1507.03 1507.55 1508.35  
 1508.91 1509.03 1510.07 1510.26 1512.02 1512.13  
 1513.10 1513.70 1514.34 1514.84 1516.15 1516.75  
 1517.44 1518.43 1519.34 1520.28 1521.32 1522.03  
 1523.83 1526.96 1527.14 1528.52 1529.57 1532.10  
 1533.51 1535.40 1538.70 1539.43 1583.43 1609.04  
 1612.35 1617.13 1620.61 1622.33 1648.91 1663.15  
 2100.23 2989.62 3004.78 3005.39 3006.00 3007.85  
 3008.91 3009.08 3009.87 3010.52 3011.61 3015.61  
 3018.95 3021.14 3022.47 3023.04 3024.99 3029.28  
 3031.79 3033.20 3036.32 3036.64 3038.72 3040.31  
 3041.29 3041.57 3042.04 3043.16 3044.30 3045.00  
 3045.63 3056.85 3058.69 3061.00 3063.91 3064.84  
 3068.08 3070.94 3071.55 3072.38 3073.55 3076.28  
 3076.94 3077.90 3078.36 3080.47 3081.39 3087.64  
 3088.04 3088.26 3088.46 3088.88 3089.54 3089.73  
 3092.48 3093.66 3095.41 3097.42 3099.59 3100.80  
 3101.32 3101.62 3102.02 3104.38 3105.48 3108.92  
 3109.37 3112.17 3113.67 3114.75 3117.32 3119.21  
 3121.61 3125.63 3126.98 3127.69 3132.92 3133.21  
 3134.61 3135.77 3137.30 3143.67 3149.90 3154.97  
 3157.77 3163.47 3164.72 3166.35 3166.75 3167.45  
 3169.05 3172.46 3175.57 3181.13 3185.56 3190.19  
 3195.18 3198.89 3208.60 3220.17 3230.67 3240.32  
 3245.72 3263.30 3498.58

3F

11.76 17.85 21.08 21.92 24.16 25.49  
 30.49 33.21 33.53 36.83 40.55 41.19  
 48.17 49.54 51.56 57.39 58.95 59.66  
 62.69 66.52 71.86 73.09 76.81 80.99  
 83.61 85.06 89.09 92.25 97.30 100.63

103.96 105.36 109.08 113.90 118.14 120.47  
 123.77 128.20 131.86 138.85 145.10 147.58  
 148.02 154.68 160.50 161.77 163.28 167.37  
 171.15 174.87 176.27 185.83 188.24 190.27  
 195.53 201.14 203.49 207.78 209.02 212.01  
 218.49 220.94 223.18 226.02 228.79 230.86  
 233.41 237.30 240.44 246.52 248.55 252.18  
 253.84 255.54 257.14 258.81 260.86 261.80  
 264.15 269.92 276.68 277.47 292.82 294.29  
 299.04 300.28 302.54 303.73 307.33 307.64  
 309.71 309.99 314.20 318.40 322.87 324.17  
 331.26 340.30 345.24 356.85 359.38 363.49  
 364.88 366.73 368.42 370.44 370.95 371.57  
 376.68 381.78 390.99 397.41 404.46 407.19  
 418.81 419.41 438.04 449.82 454.11 454.74  
 455.86 456.47 458.48 465.85 468.33 470.52  
 474.25 483.90 485.36 491.30 496.96 497.10  
 497.55 499.32 502.83 503.49 504.83 513.79  
 530.85 537.08 541.80 552.68 583.91 605.68  
 610.30 626.13 629.09 645.50 652.60 663.50  
 668.86 717.01 718.69 724.71 737.60 747.56  
 751.76 752.48 753.32 753.42 784.21 791.84  
 807.30 813.74 814.77 819.79 827.99 830.78  
 832.54 856.01 857.24 869.43 869.95 876.13  
 890.40 890.52 891.63 891.82 892.29 893.36  
 895.55 900.13 901.59 905.80 909.69 911.29  
 913.94 918.39 935.97 944.38 946.62 947.24  
 949.92 950.96 952.40 953.29 957.20 959.50  
 970.92 972.36 973.48 973.97 975.36 979.86  
 992.17 996.36 1000.25 1007.61 1013.03 1023.73  
 1029.67 1035.11 1037.99 1041.74 1042.68 1042.86  
 1043.16 1043.54 1043.96 1044.34 1045.43 1046.41  
 1046.81 1057.38 1063.32 1068.05 1073.61 1074.90  
 1081.60 1085.86 1088.49 1094.35 1097.91 1106.02  
 1106.66 1112.28 1112.62 1122.24 1126.66 1130.76  
 1136.52 1139.10 1143.93 1156.17 1173.19 1184.45  
 1189.83 1194.96 1201.36 1205.51 1206.52 1213.39  
 1215.78 1225.00 1232.83 1235.15 1239.20 1240.52  
 1241.56 1241.76 1242.38 1242.92 1244.83 1246.24  
 1250.01 1264.10 1274.00 1283.69 1287.58 1294.93  
 1299.79 1303.09 1306.13 1307.12 1310.35 1316.17  
 1319.54 1322.39 1330.87 1338.74 1340.81 1348.18  
 1351.99 1352.56 1359.14 1366.72 1369.24 1369.90  
 1379.04 1383.17 1387.87 1388.98 1391.93 1393.48  
 1394.60 1394.88 1395.03 1395.67 1396.72 1396.90  
 1397.45 1401.57 1403.52 1405.37 1409.62 1410.82  
 1411.30 1414.18 1419.54 1420.53 1421.67 1425.87  
 1431.62 1431.99 1433.40 1434.38 1437.54 1462.08  
 1476.25 1481.75 1483.00 1485.06 1485.83 1486.33  
 1486.68 1486.93 1487.31 1489.46 1490.85 1491.60  
 1492.64 1493.14 1497.37 1498.46 1498.92 1499.10  
 1499.65 1500.99 1502.22 1503.66 1504.66 1505.74  
 1505.97 1507.18 1507.58 1507.75 1508.13 1508.31  
 1508.46 1508.73 1509.12 1510.43 1510.59 1514.41  
 1514.89 1515.46 1515.70 1518.65 1520.27 1520.64  
 1520.90 1521.61 1523.59 1524.81 1529.34 1529.54  
 1532.35 1533.47 1535.46 1539.81 1574.33 1587.12  
 1610.29 1611.61 1614.39 1622.40 1660.95 2986.88

3003.93 3006.46 3006.80 3007.14 3008.03 3008.19  
3008.59 3010.62 3012.96 3014.87 3016.32 3017.00  
3021.35 3022.75 3027.45 3028.82 3030.13 3034.27  
3037.02 3037.19 3037.71 3039.01 3040.37 3042.90  
3043.66 3046.36 3048.46 3051.29 3059.67 3063.86  
3066.69 3068.58 3070.79 3071.12 3073.17 3073.47  
3074.70 3075.16 3077.15 3079.72 3081.31 3082.59  
3085.09 3085.87 3085.98 3088.44 3089.06 3089.67  
3091.24 3091.26 3091.50 3091.53 3095.73 3096.04  
3096.88 3097.05 3099.85 3100.83 3102.13 3102.27  
3104.13 3104.98 3106.02 3106.48 3109.81 3110.27  
3112.90 3113.63 3114.55 3118.65 3131.53 3133.00  
3142.11 3148.97 3156.61 3159.33 3163.12 3165.52  
3166.69 3174.78 3177.86 3182.74 3190.72 3191.59  
3193.39 3197.47 3220.26 3276.45 3451.54 3552.06

=====  
3F'  
=====

10.78 14.81 20.84 22.15 24.45 24.66  
27.07 32.48 36.06 41.08 41.58 44.12  
47.14 49.16 50.61 57.22 58.18 61.96  
63.01 67.38 69.47 72.49 77.58 79.54  
80.90 81.69 86.61 87.69 89.12 93.36  
99.09 100.94 102.86 104.71 110.27 115.15  
119.88 123.83 124.71 126.40 129.88 140.52  
141.44 144.21 148.60 149.86 154.02 155.42  
156.92 158.38 164.78 166.02 171.36 174.89  
179.86 186.53 190.19 192.03 200.96 205.51  
206.64 210.21 213.46 214.15 215.09 222.16  
224.61 229.21 231.38 234.32 236.94 237.57  
238.77 241.64 243.85 246.52 251.41 252.67  
254.94 257.40 259.42 259.97 261.46 266.76  
268.20 283.95 290.68 296.38 296.82 301.10  
301.95 302.90 305.14 309.23 310.41 310.84  
313.13 315.67 325.44 328.09 331.04 331.39  
341.28 345.63 352.08 359.17 361.56 363.74  
365.57 368.43 370.44 373.23 374.72 378.73  
382.93 395.27 399.85 403.00 410.93 420.53  
429.03 437.16 449.08 454.20 455.62 455.89  
460.35 468.21 469.80 472.86 478.41 485.63  
487.31 490.26 493.95 495.42 496.68 498.06  
499.63 501.33 505.58 506.15 515.24 536.54  
536.99 541.27 553.02 555.19 575.86 583.55  
609.08 612.05 629.54 632.09 633.43 644.48  
653.80 664.91 670.71 716.90 717.73 719.45  
724.11 737.50 749.81 750.87 751.23 752.15  
752.24 759.03 768.24 784.44 787.25 810.00  
812.65 816.75 823.81 828.97 830.89 844.54  
849.66 859.10 860.79 869.19 872.42 886.77  
888.02 889.60 889.72 891.53 892.42 892.59  
894.30 900.01 900.40 904.04 910.80 914.13  
915.96 924.64 936.38 943.42 945.61 947.05  
948.88 949.84 950.29 951.66 954.58 962.74  
965.67 966.55 967.25 974.14 978.53 978.60  
979.96 986.19 994.80 997.40 998.22 999.60  
1005.74 1015.84 1021.63 1028.54 1034.13 1039.81  
1040.74 1041.12 1041.64 1042.55 1042.85 1043.15  
1044.26 1044.65 1045.15 1046.46 1050.22 1055.38

1061.74 1067.35 1070.68 1072.48 1084.89 1085.95  
1087.25 1092.07 1099.17 1102.97 1104.77 1107.35  
1108.36 1110.41 1111.29 1120.87 1128.33 1130.02  
1139.36 1144.66 1154.19 1169.58 1184.02 1187.52  
1189.85 1195.03 1201.46 1203.21 1205.10 1207.62  
1211.88 1220.94 1223.60 1232.44 1233.28 1234.79  
1238.51 1239.53 1240.14 1241.09 1242.05 1242.67  
1243.92 1248.33 1252.02 1258.30 1266.66 1273.79  
1286.16 1288.04 1299.88 1302.65 1304.08 1308.40  
1313.90 1314.40 1316.04 1317.78 1320.23 1330.89  
1334.89 1338.08 1345.34 1349.58 1356.03 1357.00  
1362.25 1365.49 1368.58 1368.99 1375.94 1381.81  
1383.81 1386.81 1387.51 1390.80 1393.58 1393.84  
1393.90 1394.03 1395.38 1396.43 1397.15 1399.28  
1401.58 1401.71 1407.78 1411.15 1413.08 1413.47  
1416.43 1420.26 1420.63 1423.58 1425.31 1431.81  
1432.20 1432.67 1436.48 1441.23 1463.92 1473.17  
1482.10 1483.49 1484.59 1485.67 1486.47 1487.38  
1487.55 1487.90 1489.56 1490.22 1490.71 1492.41  
1493.16 1493.50 1496.58 1498.03 1498.68 1499.51  
1499.91 1500.77 1501.96 1502.56 1503.88 1504.62  
1505.79 1506.36 1507.06 1507.52 1507.80 1508.56  
1509.40 1509.62 1510.32 1512.66 1512.87 1513.82  
1514.03 1514.63 1515.15 1516.47 1518.40 1518.80  
1520.03 1523.06 1523.41 1523.70 1526.72 1529.17  
1532.07 1535.40 1536.28 1538.30 1543.69 1586.43  
1608.07 1612.72 1613.13 1617.29 1622.54 1647.76  
1663.44 2994.36 2996.19 3004.04 3004.22 3005.41  
3006.06 3006.77 3007.13 3007.75 3012.75 3016.26  
3016.35 3017.22 3022.63 3024.43 3025.61 3027.54  
3029.82 3030.18 3031.79 3037.77 3037.98 3039.52  
3041.39 3041.66 3043.84 3044.12 3046.25 3047.25  
3061.85 3063.72 3066.66 3066.88 3067.15 3069.04  
3070.91 3071.81 3072.23 3073.32 3075.48 3078.14  
3081.11 3083.93 3087.57 3087.98 3090.03 3090.28  
3090.63 3090.96 3091.26 3092.70 3093.56 3095.12  
3095.74 3097.82 3098.37 3098.61 3100.41 3100.63  
3101.63 3101.67 3108.39 3113.57 3114.41 3114.62  
3116.41 3121.70 3123.23 3123.39 3126.53 3127.45  
3129.17 3134.67 3139.21 3153.25 3156.65 3158.21  
3165.84 3167.55 3169.91 3170.44 3171.59 3172.23  
3175.41 3177.20 3181.28 3188.51 3190.74 3194.74  
3205.82 3207.43 3233.64 3250.64 3266.43 3513.36

=====  
3G  
=====

10.43 13.17 18.10 19.27 27.19 31.97  
33.64 34.42 38.60 40.92 44.26 46.96  
49.70 52.52 53.05 56.65 60.07 61.98  
62.32 64.16 68.06 72.49 76.00 79.14  
82.38 82.55 85.07 86.03 87.14 89.61  
94.07 97.07 98.59 104.06 105.77 111.16  
114.76 119.14 122.18 124.24 132.72 135.96  
140.15 142.40 146.29 148.44 154.89 159.39  
163.85 168.54 171.65 176.04 178.81 180.42  
182.20 190.40 192.87 196.68 200.70 203.81  
207.18 213.36 215.96 218.74 222.32 230.43  
233.71 236.42 237.80 238.23 243.86 244.99

247.42 250.35 251.73 252.52 253.56 256.06  
 256.69 258.95 261.93 266.41 272.14 274.49  
 277.08 283.61 294.55 295.94 299.81 301.59  
 305.06 305.22 306.98 309.85 311.24 314.94  
 319.60 327.34 332.10 336.30 349.26 352.48  
 355.47 363.98 365.01 365.73 367.01 370.67  
 373.41 377.90 378.53 384.81 386.26 399.39  
 403.76 414.97 418.61 423.58 441.40 445.03  
 450.98 452.72 452.97 455.72 457.80 467.93  
 477.54 480.69 487.57 490.32 493.47 495.87  
 496.36 498.18 499.96 502.85 504.71 510.13  
 517.48 524.91 531.60 550.60 575.24 589.36  
 610.08 625.01 626.71 644.92 652.16 667.93  
 674.73 706.15 717.55 721.10 734.94 747.36  
 748.46 750.04 750.30 752.17 781.21 787.12  
 806.20 808.75 814.90 818.73 821.05 828.89  
 829.83 846.27 864.28 866.28 868.62 876.44  
 886.44 886.71 887.84 888.57 889.76 890.63  
 894.65 898.44 904.43 906.18 911.38 915.70  
 923.12 923.45 931.40 939.63 943.29 943.94  
 945.58 946.77 948.40 948.89 949.02 950.70  
 954.01 974.94 975.33 976.72 983.12 984.68  
 995.88 998.79 1006.09 1008.08 1012.73 1023.51  
 1031.75 1037.46 1038.82 1040.60 1040.82 1041.17  
 1042.13 1042.25 1042.76 1043.89 1045.49 1045.53  
 1049.29 1058.28 1060.64 1065.32 1067.36 1072.22  
 1082.58 1086.76 1089.48 1095.81 1097.13 1101.43  
 1108.44 1113.04 1115.41 1118.98 1125.06 1128.32  
 1132.13 1135.90 1137.70 1152.89 1167.88 1184.77  
 1187.61 1188.75 1197.58 1208.38 1209.60 1213.59  
 1216.66 1220.42 1232.55 1234.23 1234.49 1236.76  
 1239.04 1240.85 1241.49 1242.05 1243.33 1251.01  
 1251.20 1265.82 1271.81 1281.18 1292.83 1298.43  
 1298.73 1302.63 1305.32 1306.18 1314.10 1316.34  
 1318.32 1331.51 1340.32 1342.55 1345.94 1349.75  
 1352.56 1356.40 1360.20 1368.44 1370.75 1372.04  
 1381.46 1382.89 1390.38 1391.12 1391.74 1392.65  
 1393.77 1394.17 1394.75 1394.94 1396.02 1397.33  
 1399.79 1400.70 1407.17 1411.84 1415.49 1415.76  
 1417.96 1418.09 1419.67 1420.41 1423.04 1423.21  
 1431.79 1432.01 1435.45 1436.01 1438.89 1462.40  
 1467.30 1482.23 1483.88 1484.45 1484.82 1486.06  
 1486.37 1488.46 1489.11 1489.85 1490.53 1490.90  
 1491.81 1494.82 1495.22 1495.60 1498.55 1499.64  
 1500.32 1501.19 1501.60 1501.79 1502.65 1503.40  
 1504.86 1505.63 1506.03 1506.32 1507.45 1507.64  
 1508.24 1508.38 1508.72 1509.21 1509.44 1510.51  
 1510.88 1513.41 1515.18 1516.26 1517.03 1518.40  
 1519.07 1519.65 1520.52 1521.66 1522.43 1524.23  
 1526.55 1527.61 1530.02 1532.03 1571.29 1587.55  
 1591.86 1610.27 1612.68 1617.74 1647.32 2997.85  
 3000.38 3003.56 3005.01 3005.63 3005.66 3006.34  
 3008.77 3008.92 3010.14 3014.40 3015.97 3016.77  
 3021.94 3022.66 3024.10 3024.78 3029.23 3033.92  
 3034.92 3036.53 3037.77 3040.03 3041.37 3041.84  
 3042.68 3043.61 3047.63 3049.76 3053.44 3062.16  
 3063.01 3064.62 3066.43 3069.66 3069.86 3070.22  
 3071.65 3072.01 3072.61 3074.19 3075.28 3076.74

3080.84 3081.78 3084.46 3087.24 3089.28 3090.71  
 3090.90 3092.82 3094.49 3094.57 3096.23 3100.74  
 3102.12 3102.19 3103.38 3103.79 3108.00 3108.99  
 3109.86 3112.47 3114.05 3114.60 3114.84 3115.25  
 3117.23 3120.83 3123.73 3124.15 3127.45 3129.94  
 3134.74 3138.51 3139.07 3139.53 3144.51 3150.57  
 3159.86 3163.22 3168.44 3178.48 3182.09 3183.02  
 3185.16 3193.52 3205.31 3212.21 3469.79 3556.54

=====  
 3G'  
 =====

15.40 17.59 22.39 22.98 24.83 29.50  
 30.90 33.52 36.89 38.04 43.04 45.65  
 46.43 49.94 53.64 55.02 57.57 59.51  
 62.52 64.82 69.47 72.12 72.44 77.33  
 81.03 81.81 84.14 86.99 89.41 92.44  
 94.39 96.95 98.19 103.21 103.91 105.48  
 107.00 108.79 113.59 118.26 121.64 124.33  
 132.84 137.25 138.42 143.28 144.36 148.96  
 149.65 153.48 160.15 163.65 165.63 168.37  
 169.72 179.65 180.68 186.79 189.89 190.52  
 194.27 198.83 201.14 208.81 210.11 217.90  
 220.25 222.07 225.29 226.39 229.20 233.49  
 236.55 236.97 238.09 241.86 244.46 248.69  
 249.71 250.95 254.36 255.05 255.96 256.78  
 260.32 261.56 262.85 263.37 269.55 271.64  
 273.87 279.77 296.04 299.71 305.79 306.66  
 308.42 312.84 316.14 318.99 329.24 335.34  
 337.69 339.26 352.64 356.69 364.30 365.68  
 365.95 368.63 374.28 375.89 378.32 381.29  
 381.95 386.94 395.13 398.90 402.07 413.31  
 418.25 423.71 435.00 437.63 442.65 450.63  
 453.14 454.08 456.43 456.63 465.33 468.18  
 477.93 478.09 485.50 491.13 494.32 496.58  
 497.84 499.75 500.72 502.54 503.30 516.10  
 521.60 531.86 549.79 557.18 564.99 573.45  
 586.18 609.91 625.46 627.87 635.44 643.47  
 656.46 668.90 675.48 704.54 714.12 716.57  
 719.33 730.71 743.68 747.32 749.75 750.30  
 751.21 773.40 779.56 786.29 806.05 807.85  
 815.13 821.95 824.02 828.18 830.87 840.65  
 846.40 859.37 860.09 865.09 866.23 882.45  
 889.28 889.83 890.26 890.79 891.09 895.07  
 900.71 902.13 907.38 910.15 915.89 921.45  
 925.69 929.69 932.98 940.38 942.04 943.60  
 944.88 946.54 946.84 950.15 950.83 952.57  
 954.76 965.38 973.05 974.56 975.83 981.38  
 981.90 984.29 987.43 997.25 1003.58 1005.86  
 1011.30 1012.00 1024.35 1031.76 1037.67 1039.09  
 1040.74 1040.90 1042.34 1042.90 1043.31 1043.57  
 1043.88 1044.62 1047.37 1051.49 1058.18 1059.55  
 1064.75 1065.26 1072.03 1072.62 1082.24 1084.08  
 1094.07 1099.85 1101.62 1101.69 1110.15 1110.59  
 1113.35 1118.29 1119.13 1126.83 1128.48 1130.04  
 1134.38 1138.79 1150.27 1164.06 1184.79 1189.77  
 1190.39 1192.18 1195.46 1209.37 1209.58 1215.68  
 1216.74 1217.87 1221.41 1228.25 1233.33 1235.04  
 1238.87 1240.11 1240.66 1242.41 1243.16 1243.87

1247.03 1249.68 1251.10 1267.32 1273.26 1275.14  
 1280.12 1289.62 1295.18 1299.45 1303.73 1305.61  
 1307.41 1313.02 1314.64 1318.65 1333.43 1339.46  
 1347.33 1349.44 1349.73 1353.96 1355.24 1357.25  
 1366.51 1369.10 1369.25 1373.63 1383.40 1384.03  
 1387.49 1392.13 1392.32 1393.78 1394.46 1395.47  
 1396.11 1397.58 1399.11 1400.24 1400.78 1401.62  
 1405.74 1406.75 1412.83 1414.35 1417.00 1418.28  
 1418.77 1419.52 1422.96 1423.68 1430.44 1431.64  
 1433.43 1435.08 1437.08 1440.05 1463.80 1468.30  
 1476.73 1480.34 1481.81 1483.27 1485.50 1486.87  
 1487.19 1490.46 1491.01 1491.26 1492.02 1492.80  
 1494.34 1494.75 1495.87 1497.55 1499.18 1500.51  
 1500.77 1501.36 1502.00 1502.19 1502.88 1503.02  
 1504.77 1506.13 1506.46 1507.16 1508.30 1508.40  
 1508.74 1509.15 1509.29 1509.48 1510.59 1511.11  
 1511.71 1513.86 1514.74 1515.61 1516.24 1517.58  
 1518.13 1521.46 1522.03 1522.30 1523.47 1524.04  
 1525.65 1526.56 1529.38 1531.33 1534.32 1584.85  
 1592.88 1609.31 1615.44 1616.57 1624.76 1645.68  
 1652.08 3001.56 3003.51 3005.20 3005.64 3007.67  
 3007.89 3008.76 3009.12 3010.58 3012.97 3014.41  
 3017.23 3023.39 3023.84 3028.34 3031.54 3032.25  
 3033.88 3035.67 3037.48 3038.17 3038.76 3041.40  
 3041.99 3046.35 3052.29 3055.60 3057.72 3065.00  
 3066.19 3067.54 3069.28 3069.72 3070.43 3071.53  
 3071.76 3073.25 3074.51 3074.82 3077.67 3079.03  
 3079.12 3082.96 3084.25 3085.51 3088.83 3090.24  
 3092.49 3092.74 3092.88 3094.54 3094.63 3100.70  
 3101.66 3102.99 3103.29 3105.39 3109.77 3110.44  
 3111.09 3114.34 3115.44 3118.25 3118.84 3121.79  
 3123.30 3128.13 3129.32 3130.90 3131.51 3133.85  
 3136.48 3139.89 3140.52 3143.63 3148.98 3153.23  
 3153.34 3154.70 3158.49 3160.98 3167.60 3172.78  
 3177.77 3184.28 3187.07 3189.40 3190.63 3194.48  
 3197.75 3197.87 3203.35 3213.70 3215.62 3492.30

=====

3H

=====

26.11 32.80 37.33 43.30 48.69 51.14  
 52.76 56.20 62.86 67.53 73.81 75.11  
 79.89 81.96 90.68 94.99 101.05 103.31  
 104.21 109.33 119.87 124.82 137.84 138.75  
 142.97 151.88 155.80 169.03 171.71 176.05  
 180.32 182.75 185.89 190.37 195.63 199.80  
 209.38 215.51 221.70 229.21 232.57 238.35  
 242.76 248.39 253.13 255.31 255.55 261.99  
 267.35 270.13 274.35 279.97 286.58 291.41  
 300.06 320.14 326.12 333.46 341.71 349.49  
 360.68 361.17 381.85 386.03 393.01 393.30  
 403.11 415.61 420.62 428.80 450.09 452.40  
 455.77 464.56 467.29 475.21 479.95 484.47  
 486.37 507.11 518.20 523.50 530.44 536.52  
 555.24 585.65 608.01 615.82 627.94 631.69  
 645.86 651.87 666.69 667.30 717.63 719.82  
 733.84 744.89 747.70 749.90 784.27 790.52  
 809.77 812.92 814.17 825.39 827.52 828.18  
 833.04 858.71 861.22 867.69 872.30 881.90

896.03 902.32 902.77 905.52 907.68 912.26  
 913.16 917.66 938.64 942.09 943.91 944.24  
 948.01 951.27 960.71 965.81 974.31 975.31  
 975.40 976.04 989.79 991.33 1010.59 1024.21  
 1028.05 1036.35 1041.27 1043.65 1044.71 1047.63  
 1048.61 1055.71 1065.85 1068.73 1070.87 1072.09  
 1084.71 1088.81 1094.80 1097.87 1098.84 1105.83  
 1107.67 1111.94 1117.59 1124.12 1127.75 1130.04  
 1132.44 1135.53 1143.39 1147.81 1175.04 1185.68  
 1191.49 1193.51 1201.33 1209.58 1210.76 1214.09  
 1215.19 1224.71 1232.77 1242.04 1252.33 1282.26  
 1287.03 1295.26 1297.02 1302.01 1303.66 1305.32  
 1307.62 1309.42 1313.53 1320.41 1325.47 1342.88  
 1344.57 1349.24 1350.23 1351.24 1358.13 1361.30  
 1368.19 1369.84 1375.66 1381.07 1387.24 1390.15  
 1393.89 1395.47 1395.82 1400.71 1402.49 1403.06  
 1411.28 1413.77 1414.92 1419.96 1420.85 1425.69  
 1430.70 1433.13 1433.69 1434.67 1437.37 1464.54  
 1478.19 1486.07 1489.19 1492.62 1493.81 1496.24  
 1497.27 1497.87 1499.96 1500.70 1501.29 1501.83  
 1502.51 1502.91 1503.32 1503.84 1504.88 1505.93  
 1506.84 1508.92 1508.94 1511.50 1513.22 1513.62  
 1515.88 1516.21 1517.58 1519.49 1522.32 1524.64  
 1527.18 1528.35 1530.89 1533.52 1580.09 1595.12  
 1598.11 1609.15 1617.76 1622.58 1657.15 3007.88  
 3010.46 3011.86 3011.96 3012.24 3018.77 3019.60  
 3028.36 3029.28 3031.33 3031.53 3035.15 3035.50  
 3037.59 3039.75 3040.76 3042.21 3047.73 3051.45  
 3053.65 3055.71 3061.71 3064.01 3068.77 3069.65  
 3071.53 3072.98 3076.04 3082.36 3085.58 3089.55  
 3093.36 3093.98 3094.97 3095.08 3100.82 3101.20  
 3105.63 3111.03 3111.90 3117.26 3118.88 3120.16  
 3124.83 3126.87 3129.12 3131.95 3133.70 3135.03  
 3138.11 3139.58 3143.55 3155.95 3156.90 3164.07  
 3175.20 3180.85 3185.33 3188.44 3191.82 3196.87  
 3201.34 3421.67 3505.35

=====

3H'

=====

16.07 19.07 24.99 33.86 35.72 39.24  
 45.49 50.02 53.15 56.65 60.40 65.54  
 68.56 69.54 75.09 81.88 86.65 88.83  
 96.69 100.14 102.55 105.37 108.50 115.21  
 128.80 131.10 138.23 142.21 150.88 152.58  
 156.99 169.44 170.57 173.57 184.88 186.11  
 196.45 198.31 206.89 209.92 217.45 225.29  
 227.24 229.93 232.26 242.09 244.79 249.11  
 251.21 252.88 260.94 263.85 268.95 273.02  
 282.19 287.77 301.98 308.62 321.08 327.16  
 331.00 341.87 346.07 353.98 361.76 362.32  
 380.90 388.06 391.96 395.82 402.45 412.11  
 421.12 422.84 429.45 450.20 454.79 456.30  
 466.08 468.87 472.50 478.61 480.60 483.75  
 489.30 515.43 524.58 531.65 535.60 550.41  
 554.77 585.47 588.62 607.36 617.32 626.75  
 632.93 635.80 644.78 650.71 667.16 668.45  
 702.70 710.14 719.28 733.36 742.30 747.91  
 749.99 758.65 767.43 783.95 789.65 810.44



813.17 814.94 826.82 828.11 830.71 832.20  
846.27 852.29 857.87 867.61 872.03 877.55  
895.67 903.08 904.32 905.78 907.18 908.96  
912.29 923.10 938.04 942.34 943.46 944.42  
947.38 947.76 949.88 960.47 962.79 966.25  
971.13 973.51 974.12 975.89 985.98 988.73  
1006.66 1010.60 1024.48 1027.97 1035.21 1040.83  
1042.89 1044.70 1046.96 1048.92 1053.83 1055.85  
1065.47 1067.72 1070.01 1071.84 1083.17 1088.57  
1094.98 1097.16 1101.02 1104.60 1105.99 1106.75  
1111.63 1117.60 1124.31 1127.36 1129.38 1131.27  
1137.27 1142.20 1147.90 1174.93 1185.08 1187.03  
1191.56 1191.70 1201.24 1206.21 1209.50 1210.31  
1213.81 1215.42 1223.46 1233.61 1241.10 1246.70  
1251.95 1280.52 1283.76 1293.08 1296.36 1300.65  
1302.15 1304.76 1307.13 1310.46 1313.33 1314.31  
1320.84 1325.28 1341.53 1344.22 1347.00 1348.63  
1349.96 1360.05 1360.27 1363.32 1367.79 1369.25  
1374.79 1380.53 1385.99 1388.36 1389.92 1393.89  
1395.28 1395.84 1400.45 1401.44 1403.51 1413.29  
1413.77 1416.51 1419.57 1420.91 1424.83 1431.44  
1432.92 1434.59 1437.55 1437.86 1465.75 1476.61  
1485.64 1489.39 1492.07 1493.10 1494.58 1496.63  
1497.58 1499.53 1499.92 1500.77 1500.96 1501.92  
1502.51 1502.71 1503.98 1504.17 1505.38 1507.84  
1507.99 1508.28 1509.48 1510.35 1513.14 1513.66  
1516.70 1516.87 1517.90 1519.61 1522.40 1523.91  
1525.27 1527.83 1530.83 1532.49 1533.85 1594.43  
1596.81 1608.80 1620.87 1621.96 1624.17 1652.54  
1655.12 3008.75 3011.31 3012.54 3012.76 3012.93  
3019.13 3023.04 3027.07 3029.56 3030.14 3031.84  
3036.00 3039.62 3040.33 3040.63 3041.68 3043.98  
3051.31 3054.28 3056.61 3058.85 3061.55 3067.61  
3069.50 3070.48 3072.28 3072.95 3076.02 3079.74  
3084.52 3085.50 3090.17 3090.66 3094.12 3098.06  
3100.14 3101.81 3105.92 3108.54 3109.44 3113.72  
3115.47 3122.22 3122.73 3126.62 3128.25 3132.35  
3134.07 3136.39 3145.79 3146.90 3151.63 3156.33  
3158.03 3158.71 3163.80 3167.27 3171.91 3174.65  
3180.81 3186.39 3186.45 3193.44 3194.29 3197.98  
3211.26 3257.22 3481.56

3H-TS

-410.27 28.38 32.81 37.66 41.92 46.61  
50.83 52.31 57.66 63.68 66.29 68.15  
73.18 78.73 81.41 88.06 95.72 96.72  
101.50 105.39 113.12 117.39 127.62 138.74  
141.53 145.42 152.39 155.51 169.44 173.32  
176.11 178.75 181.89 186.70 196.01 200.72  
210.64 220.99 227.78 229.85 233.38 238.92  
247.71 249.20 254.07 256.02 256.90 261.57  
269.46 272.96 282.24 284.69 291.82 300.29  
319.78 324.83 333.42 340.54 350.22 359.32  
362.18 375.64 379.76 386.40 393.04 395.70  
404.88 420.01 427.81 429.37 433.85 449.98  
453.62 455.52 462.09 468.45 468.77 476.40  
482.05 485.56 513.52 524.27 528.79 535.47

555.90 585.48 607.65 615.52 623.46 632.12  
637.11 644.57 650.39 669.53 692.55 719.20  
723.20 734.85 746.38 752.53 782.90 789.12  
790.84 810.18 812.33 812.45 825.12 827.84  
833.89 835.04 858.84 868.53 868.57 870.82  
877.02 896.66 901.78 903.07 904.85 907.29  
912.21 916.33 938.08 941.26 943.03 943.78  
947.72 950.87 961.57 964.38 966.12 973.09  
973.82 974.35 978.12 988.12 998.77 1011.27  
1022.93 1028.45 1036.33 1043.49 1043.79 1046.59  
1048.31 1055.03 1056.91 1063.75 1068.16 1070.17  
1071.62 1087.52 1093.28 1097.61 1097.92 1104.71  
1105.95 1111.53 1116.28 1124.53 1127.01 1129.13  
1132.22 1136.05 1141.88 1148.29 1176.19 1185.81  
1187.49 1193.31 1201.48 1208.46 1209.97 1210.30  
1213.96 1224.79 1232.65 1241.86 1248.63 1281.20  
1287.02 1292.99 1295.62 1296.43 1302.00 1305.80  
1307.18 1312.16 1312.45 1319.55 1324.29 1342.37  
1343.61 1349.87 1350.64 1352.11 1357.41 1361.41  
1367.87 1369.66 1375.33 1379.90 1386.13 1389.16  
1393.10 1394.64 1395.58 1399.88 1400.83 1402.28  
1410.26 1414.04 1415.51 1418.59 1419.45 1423.12  
1429.52 1432.76 1433.84 1435.36 1436.77 1466.74  
1475.53 1485.92 1490.50 1491.86 1492.77 1495.26  
1495.88 1496.95 1497.89 1499.34 1499.89 1500.38  
1501.11 1502.00 1502.43 1503.12 1503.92 1505.27  
1505.54 1507.67 1508.35 1511.10 1512.07 1513.40  
1515.57 1516.83 1518.42 1519.33 1522.85 1523.26  
1525.21 1525.95 1530.26 1533.85 1586.90 1594.24  
1598.84 1605.51 1606.69 1617.61 1657.18 3005.57  
3008.79 3009.84 3010.25 3011.12 3015.10 3018.04  
3024.95 3028.27 3031.68 3031.91 3034.26 3034.77  
3036.43 3038.74 3039.65 3041.24 3041.99 3047.80  
3054.47 3056.64 3059.74 3061.84 3066.73 3069.17  
3069.40 3071.34 3078.35 3080.53 3083.67 3085.74  
3089.04 3090.49 3092.51 3093.50 3098.61 3099.55  
3104.50 3110.32 3110.44 3110.93 3114.16 3115.54  
3118.25 3124.47 3126.38 3131.77 3133.19 3138.12  
3139.58 3142.18 3143.68 3156.08 3156.45 3162.02  
3170.45 3179.39 3181.01 3181.87 3190.95 3198.07  
3200.70 3542.99 3629.61

3H'-TS

-379.43 9.88 24.43 28.98 34.10 35.37  
39.83 43.65 49.55 55.20 57.66 61.21  
65.73 70.76 71.52 77.59 81.58 87.37  
92.74 96.75 103.77 104.37 105.86 109.39  
124.82 130.15 139.20 142.72 145.45 149.68  
152.95 157.14 169.59 172.65 177.29 183.28  
185.02 195.37 201.36 211.34 221.43 225.12  
228.05 230.70 239.11 243.34 251.50 253.75  
254.47 258.71 261.22 264.72 275.33 279.81  
284.20 288.28 290.09 301.02 303.14 319.26  
325.00 326.50 340.02 348.65 359.69 363.59  
381.51 391.52 394.30 398.13 405.06 420.27  
427.63 428.69 437.96 450.36 455.24 456.00  
459.53 462.75 469.76 474.24 479.62 481.56

510.66 523.38 526.60 529.02 534.20 553.36  
554.17 577.80 595.58 606.25 617.30 621.22  
626.84 632.52 637.06 644.70 646.97 671.49  
700.78 712.33 718.34 727.19 733.96 747.32  
751.79 768.34 784.15 788.88 808.89 812.03  
813.18 813.58 826.22 826.91 827.47 834.10  
845.53 854.55 857.17 869.00 870.91 871.54  
894.21 898.28 902.46 904.54 904.68 907.43  
911.60 920.77 938.05 941.95 943.47 943.64  
947.44 947.81 957.61 960.67 961.79 962.83  
971.20 972.92 973.25 980.15 981.89 987.01  
987.47 1001.85 1005.99 1023.09 1028.16 1035.68  
1043.21 1043.49 1046.78 1048.73 1052.34 1054.43  
1055.00 1064.35 1067.23 1069.93 1071.66 1091.18  
1094.59 1096.79 1103.35 1104.62 1105.50 1111.34  
1115.74 1116.63 1125.08 1127.29 1129.11 1133.98  
1136.04 1143.19 1147.37 1176.93 1185.76 1189.35  
1191.67 1192.25 1201.37 1208.40 1209.38 1209.79  
1214.20 1215.90 1226.92 1231.59 1238.59 1247.95  
1265.05 1274.76 1285.29 1287.98 1295.89 1300.36  
1301.37 1302.69 1305.47 1306.21 1312.77 1319.21  
1326.86 1329.44 1340.63 1344.42 1347.59 1351.05  
1357.50 1358.29 1365.85 1367.38 1368.49 1369.60  
1378.49 1379.47 1384.75 1388.58 1392.72 1394.68  
1395.79 1398.17 1400.91 1402.73 1404.99 1411.41  
1412.87 1413.70 1418.15 1419.28 1422.99 1430.02  
1432.34 1433.18 1433.67 1436.36 1470.64 1473.05  
1485.96 1490.37 1492.03 1492.85 1494.63 1495.21  
1496.89 1497.52 1499.14 1499.79 1499.93 1501.08  
1501.81 1502.43 1503.46 1504.42 1504.82 1507.83  
1508.51 1508.80 1510.92 1512.18 1512.42 1513.14  
1516.19 1518.11 1518.22 1519.28 1523.02 1523.41  
1524.71 1528.16 1530.32 1534.27 1536.96 1594.41  
1597.30 1604.56 1606.70 1619.36 1632.48 1657.77  
1658.32 3008.16 3009.18 3011.36 3011.64 3011.79  
3017.73 3019.16 3029.35 3030.50 3030.91 3034.79  
3035.93 3037.23 3038.04 3039.73 3041.74 3043.35  
3045.50 3051.47 3053.93 3056.82 3060.36 3064.06  
3066.25 3069.56 3069.78 3071.24 3077.58 3079.06  
3081.49 3081.65 3082.45 3091.62 3091.69 3098.58  
3098.89 3099.58 3106.53 3108.42 3108.60 3109.06  
3111.44 3115.09 3121.64 3125.14 3127.27 3127.88  
3133.71 3135.42 3135.64 3141.63 3148.92 3156.85  
3157.77 3159.16 3164.48 3168.39 3174.07 3180.40  
3180.89 3182.97 3198.91 3199.27 3200.09 3207.96  
3227.70 3240.18 3571.14

=====  
3I  
=====

15.18 25.09 26.13 33.74 38.01 38.63  
41.06 45.27 55.46 59.16 61.99 64.89  
69.49 74.08 78.42 80.61 86.84 92.42  
95.34 100.45 105.34 110.56 119.63 128.14  
136.63 143.81 149.55 155.13 159.12 166.07  
171.40 182.07 185.38 190.39 194.06 200.38  
211.22 220.84 229.73 233.36 241.44 249.24  
252.83 254.05 255.78 260.87 271.14 273.05  
285.05 294.36 299.80 302.08 322.29 326.18

331.95 336.89 341.04 353.20 360.07 364.42  
382.62 386.16 395.42 396.52 404.38 406.65  
417.78 419.36 432.35 449.97 452.02 455.11  
458.42 470.84 476.27 478.61 485.49 513.21  
518.18 524.78 526.94 533.98 544.48 554.03  
556.18 585.36 609.31 615.77 630.47 635.04  
642.25 652.86 671.68 704.15 717.08 728.48  
744.24 750.29 761.95 782.32 788.43 806.10  
809.01 812.43 821.13 822.92 825.84 833.50  
839.06 857.69 867.92 870.02 892.65 895.52  
897.98 900.18 902.33 906.18 909.32 912.62  
936.02 938.14 939.27 942.18 945.69 947.44  
947.84 959.69 960.37 965.42 973.61 975.07  
975.63 984.91 985.81 1015.41 1020.36 1027.65  
1036.61 1042.98 1043.64 1046.08 1048.20 1056.26  
1056.84 1060.97 1066.27 1068.89 1071.34 1085.34  
1093.07 1096.40 1096.99 1101.56 1106.61 1107.08  
1115.58 1122.57 1128.32 1130.08 1130.76 1132.84  
1138.92 1144.43 1159.77 1175.78 1185.79 1191.59  
1193.88 1202.04 1206.25 1209.33 1210.99 1213.36  
1223.12 1225.24 1237.91 1245.77 1274.26 1278.74  
1283.14 1290.89 1292.97 1293.31 1296.07 1303.01  
1305.41 1308.46 1316.18 1321.13 1337.94 1340.35  
1352.76 1354.72 1355.80 1361.58 1367.01 1367.82  
1369.05 1373.47 1375.60 1377.83 1379.11 1386.16  
1388.30 1391.68 1393.07 1397.19 1398.98 1400.76  
1407.14 1412.24 1414.02 1417.20 1418.59 1422.65  
1427.99 1431.44 1432.91 1435.28 1436.64 1472.02  
1485.64 1491.31 1491.58 1493.35 1496.36 1497.36  
1498.40 1499.38 1499.80 1501.47 1501.55 1501.99  
1502.38 1503.83 1504.40 1505.19 1507.17 1508.46  
1509.29 1510.53 1512.18 1513.19 1514.01 1514.68  
1517.37 1519.43 1519.90 1522.59 1524.07 1528.05  
1528.55 1531.08 1534.01 1542.50 1592.94 1602.47  
1607.27 1647.18 1650.33 1657.38 1667.43 3002.36  
3008.91 3009.47 3009.64 3010.72 3011.88 3015.68  
3016.60 3022.52 3025.41 3026.54 3028.68 3033.34  
3033.44 3035.80 3036.42 3037.30 3037.78 3039.89  
3047.64 3052.72 3056.49 3060.59 3062.92 3065.30  
3067.47 3068.99 3069.59 3074.69 3079.66 3080.76  
3084.42 3088.02 3088.44 3091.29 3095.62 3096.24  
3099.18 3099.42 3100.57 3101.42 3107.30 3111.08  
3115.44 3115.66 3116.31 3120.56 3121.52 3123.72  
3131.58 3137.42 3137.92 3155.11 3160.23 3166.70  
3169.56 3177.05 3187.24 3191.22 3202.79 3208.01  
3211.21 3467.61 3586.57

=====  
3I'  
=====

11.00 20.09 24.07 28.95 32.72 35.45  
37.25 39.85 47.63 55.86 56.25 59.17  
63.86 66.12 69.75 76.12 78.26 79.69  
85.51 88.89 92.97 100.30 102.88 108.76  
110.55 123.70 131.26 138.56 145.77 149.99  
150.38 155.20 162.50 173.68 182.39 186.05  
189.79 197.63 198.98 209.64 217.60 225.30  
226.59 228.16 243.64 245.07 248.69 254.58  
255.39 257.53 260.34 269.26 272.85 281.52

291.71 304.11 305.54 316.36 329.19 330.81  
333.30 339.60 352.14 359.29 362.00 380.91  
391.22 394.15 403.63 407.76 418.21 420.33  
422.81 433.60 450.06 452.33 454.41 455.05  
457.04 471.03 476.16 479.99 482.58 492.71  
512.83 523.68 526.76 532.62 537.79 553.45  
578.65 585.85 607.78 616.33 625.78 631.23  
632.89 639.72 642.35 647.16 668.30 706.96  
709.31 715.30 726.97 745.35 749.78 759.35  
761.34 780.89 786.39 804.85 808.62 810.21  
812.08 820.12 825.54 833.40 843.01 850.30  
857.03 867.13 869.97 874.95 891.70 895.77  
896.58 900.09 902.29 906.28 907.85 908.46  
922.12 934.25 936.94 938.61 940.59 943.99  
944.39 947.74 960.28 963.11 964.95 968.77  
973.21 974.17 975.42 985.93 986.27 994.01  
1013.23 1018.08 1019.70 1027.70 1036.77 1042.67  
1043.81 1045.79 1048.23 1056.63 1056.72 1058.65  
1059.77 1066.41 1069.19 1071.35 1085.90 1093.02  
1096.17 1101.11 1105.38 1105.97 1110.10 1115.36  
1121.68 1123.30 1127.71 1128.87 1129.20 1132.83  
1138.48 1144.41 1175.57 1186.22 1188.79 1194.01  
1194.37 1201.20 1205.93 1208.26 1209.00 1210.71  
1217.68 1222.38 1224.31 1227.20 1236.82 1245.41  
1267.61 1277.30 1283.68 1286.69 1292.45 1295.49  
1295.98 1302.56 1305.20 1308.00 1311.45 1315.91  
1322.23 1336.81 1340.97 1349.18 1350.26 1354.70  
1360.32 1360.67 1362.12 1366.64 1368.66 1369.17  
1376.20 1376.89 1378.66 1385.71 1388.05 1391.38  
1393.29 1396.85 1399.06 1399.59 1410.72 1411.61  
1415.44 1416.65 1418.66 1421.97 1429.36 1431.66  
1433.90 1435.61 1438.69 1445.86 1471.84 1485.92  
1491.06 1491.37 1493.76 1495.74 1496.30 1498.42  
1499.01 1499.49 1499.75 1500.37 1501.38 1501.70  
1502.18 1502.62 1503.79 1505.48 1505.72 1507.07  
1508.57 1511.20 1512.16 1513.98 1515.50 1517.84  
1519.82 1519.87 1522.83 1524.01 1524.58 1526.63  
1530.39 1533.47 1535.82 1538.40 1540.27 1592.65  
1600.88 1606.52 1642.88 1648.26 1651.72 1653.19  
1663.66 3004.31 3006.74 3008.91 3009.55 3010.45  
3011.64 3015.13 3016.29 3019.72 3026.95 3028.28  
3032.68 3033.15 3033.44 3035.40 3037.17 3037.91  
3040.71 3044.79 3046.22 3052.12 3056.23 3061.16  
3062.89 3064.82 3066.66 3067.66 3069.07 3073.04  
3078.65 3079.45 3084.05 3084.88 3090.24 3090.43  
3094.30 3096.44 3098.42 3100.63 3102.73 3108.71  
3109.69 3114.51 3114.92 3117.18 3117.59 3121.17  
3125.93 3128.16 3131.32 3137.26 3143.21 3156.43  
3174.37 3175.28 3175.44 3176.40 3181.49 3183.16  
3187.36 3192.94 3200.56 3202.10 3203.36 3207.25  
3212.74 3220.83 3456.29

3J

23.06 27.83 32.87 36.57 39.22 45.66  
48.56 51.57 57.30 62.90 64.00 70.92  
76.68 87.15 87.72 90.27 95.54 98.14  
98.59 108.60 109.44 114.00 116.02 129.22

134.83 141.27 149.54 155.80 156.67 170.40  
174.11 177.92 182.98 193.73 195.40 207.29  
217.06 222.58 225.29 227.91 231.17 238.68  
240.04 244.16 249.16 254.51 263.38 266.98  
273.13 273.94 276.36 289.29 292.79 300.66  
307.70 317.84 323.89 334.16 341.20 348.29  
356.08 362.83 379.55 385.43 390.70 399.93  
410.34 412.75 424.55 433.58 452.38 453.88  
454.63 468.31 474.01 479.25 482.77 487.97  
493.21 511.04 526.91 532.92 538.41 554.63  
584.97 602.21 613.40 624.19 626.97 643.65  
659.19 673.90 675.12 710.51 713.33 721.55  
742.12 747.65 752.02 783.87 799.54 809.77  
817.25 819.92 823.78 827.83 831.01 853.93  
858.90 865.99 870.19 895.69 902.59 904.25  
909.27 910.98 912.93 915.57 918.34 937.28  
938.60 943.24 945.87 947.08 949.64 960.05  
962.81 972.92 973.78 976.28 979.85 980.89  
997.36 1009.37 1023.54 1028.04 1030.67 1041.71  
1043.28 1043.64 1045.29 1047.92 1052.22 1056.58  
1066.07 1071.00 1072.94 1084.28 1085.93 1090.50  
1095.06 1103.40 1104.02 1106.97 1108.29 1116.49  
1125.09 1126.78 1129.39 1132.76 1140.01 1143.77  
1151.04 1178.73 1184.04 1190.27 1194.59 1202.11  
1207.40 1208.55 1210.72 1217.53 1224.04 1240.26  
1247.70 1251.33 1280.71 1286.64 1289.78 1290.31  
1297.38 1299.62 1302.46 1309.00 1310.04 1312.66  
1315.33 1327.79 1333.03 1339.59 1352.35 1353.56  
1356.58 1360.84 1363.47 1366.87 1368.12 1376.51  
1377.60 1379.05 1389.45 1392.30 1392.94 1395.02  
1397.87 1399.96 1403.08 1411.75 1413.29 1414.72  
1417.02 1418.06 1424.21 1427.96 1433.26 1434.87  
1436.61 1437.28 1463.19 1473.58 1482.26 1487.67  
1492.21 1494.20 1495.35 1496.18 1498.04 1498.61  
1499.02 1500.51 1500.78 1501.12 1502.05 1503.19  
1504.18 1505.75 1506.40 1507.59 1508.70 1510.25  
1512.06 1513.14 1515.31 1518.17 1518.43 1520.21  
1521.08 1523.71 1525.94 1527.40 1528.61 1529.68  
1532.35 1593.80 1607.97 1613.20 1616.17 1619.94  
1656.05 3013.04 3013.83 3019.73 3021.77 3027.74  
3029.77 3034.06 3034.88 3037.34 3037.96 3038.49  
3039.04 3039.66 3040.31 3041.02 3042.57 3043.15  
3043.52 3044.98 3051.09 3060.72 3068.28 3068.72  
3070.30 3072.14 3074.82 3078.36 3085.88 3087.59  
3087.94 3088.66 3089.71 3090.47 3097.62 3102.75  
3103.13 3105.11 3105.87 3108.92 3111.71 3113.21  
3115.98 3117.12 3120.30 3121.91 3130.00 3139.45  
3146.91 3156.93 3159.88 3161.46 3164.76 3165.03  
3172.62 3178.54 3181.98 3182.77 3190.00 3190.49  
3197.67 3201.87 3225.58

3K

24.19 28.75 32.13 35.88 38.81 44.22  
52.13 54.76 57.46 61.66 64.61 69.89  
71.97 74.46 85.44 87.54 94.56 96.55  
97.68 104.21 106.31 109.33 110.94 117.62  
127.40 135.22 142.01 145.05 147.24 155.44

156.82 163.42 171.92 176.95 180.29 186.08  
 193.07 196.09 210.93 220.49 221.99 225.41  
 227.13 228.94 233.24 236.72 240.58 248.06  
 252.88 255.08 265.57 271.80 273.61 275.42  
 280.35 287.84 290.88 307.88 317.59 324.10  
 335.94 338.98 347.51 349.12 358.96 361.10  
 379.56 388.64 391.69 402.49 412.44 420.26  
 424.59 429.46 451.03 453.64 454.15 468.73  
 473.23 477.46 484.13 492.12 498.20 512.02  
 526.68 533.12 537.06 554.78 585.54 603.25  
 606.86 612.73 625.75 627.62 643.35 657.55  
 659.56 671.38 673.68 713.30 720.28 722.67  
 743.44 750.76 753.16 783.80 799.71 807.72  
 816.96 820.51 823.92 827.62 829.70 858.16  
 862.17 866.18 871.14 895.25 901.78 904.94  
 908.14 910.24 912.37 915.89 916.25 935.81  
 937.87 943.05 945.66 946.74 949.34 959.63  
 961.82 971.07 973.44 976.70 979.73 980.88  
 995.73 1008.90 1024.04 1029.12 1035.68 1038.19  
 1041.49 1044.24 1045.01 1047.92 1055.07 1057.65  
 1065.18 1069.87 1072.57 1085.38 1087.47 1091.14  
 1095.18 1099.37 1103.63 1106.38 1107.79 1116.17  
 1124.61 1126.10 1129.33 1132.25 1139.54 1142.56  
 1151.91 1154.82 1177.92 1184.88 1190.33 1192.99  
 1201.70 1207.95 1208.83 1210.45 1215.14 1224.48  
 1238.63 1248.67 1249.24 1280.01 1282.74 1286.68  
 1290.57 1294.79 1300.83 1303.01 1308.82 1309.80  
 1313.20 1314.90 1328.69 1330.19 1340.45 1351.97  
 1353.47 1355.79 1360.78 1363.95 1367.17 1368.80  
 1374.79 1378.00 1381.37 1390.04 1391.89 1392.69  
 1395.24 1397.45 1400.20 1402.64 1409.51 1411.35  
 1414.82 1416.51 1416.66 1419.99 1427.39 1432.74  
 1434.19 1436.05 1438.04 1465.02 1473.74 1482.42  
 1487.37 1493.70 1494.49 1494.84 1496.62 1497.99  
 1498.54 1499.15 1500.09 1500.75 1501.82 1502.09  
 1503.04 1505.18 1506.74 1507.06 1508.27 1509.49  
 1509.54 1511.89 1512.96 1515.01 1517.68 1518.01  
 1519.66 1520.01 1523.63 1524.85 1526.68 1528.29  
 1529.96 1530.69 1594.05 1608.62 1612.31 1617.60  
 1623.88 1650.20 1657.37 1664.42 3010.98 3012.60  
 3018.82 3020.35 3027.78 3028.17 3029.22 3033.89  
 3034.85 3034.92 3036.44 3036.89 3038.04 3038.75  
 3039.74 3040.93 3042.00 3043.78 3045.25 3057.58  
 3061.61 3064.42 3066.57 3069.12 3070.22 3071.89  
 3076.98 3084.26 3084.81 3085.31 3087.51 3089.55  
 3092.07 3095.81 3101.11 3101.66 3103.46 3104.16  
 3107.82 3111.37 3114.27 3115.19 3120.87 3123.21  
 3126.10 3128.47 3134.01 3148.39 3158.19 3158.55  
 3159.01 3159.39 3161.01 3165.82 3178.42 3179.13  
 3179.52 3185.42 3186.15 3192.46 3195.28 3205.37  
 3462.39 3597.70 3615.96

=====

3K'

=====

12.54 19.92 28.82 33.35 34.20 36.74  
 39.77 45.77 50.37 54.16 57.19 59.21  
 63.27 65.17 72.39 73.83 78.93 87.76  
 90.14 94.90 98.88 100.67 106.45 107.88

112.54 115.10 120.87 122.13 135.52 136.76  
 142.97 144.60 149.76 156.35 157.00 170.68  
 173.26 177.65 181.26 194.88 198.36 203.23  
 214.35 222.60 226.10 228.33 229.61 238.25  
 242.66 244.67 253.36 256.47 260.45 267.00  
 273.57 274.87 278.51 279.47 290.11 294.48  
 306.11 308.45 318.74 325.46 335.23 340.23  
 350.19 356.29 363.52 380.32 386.27 389.47  
 391.32 401.25 409.61 412.89 419.83 425.03  
 431.19 451.84 453.74 454.08 469.11 474.77  
 478.62 482.40 491.65 498.11 511.48 526.28  
 527.96 533.41 538.21 542.95 554.84 585.14  
 602.98 612.90 627.19 627.60 630.21 643.74  
 654.64 659.61 671.49 673.28 706.83 715.94  
 718.69 723.76 741.92 749.77 753.83 770.85  
 785.33 799.62 807.64 817.35 819.95 820.40  
 822.90 828.16 831.39 848.39 858.72 861.09  
 865.01 871.16 895.34 901.30 904.53 908.62  
 910.31 911.07 912.46 914.96 916.44 936.04  
 938.72 943.68 946.49 946.82 949.10 960.44  
 962.64 969.17 972.89 974.13 974.87 978.40  
 979.63 980.08 994.71 998.01 1010.87 1016.96  
 1022.76 1029.17 1031.88 1041.94 1042.88 1044.29  
 1045.45 1047.38 1051.32 1056.65 1057.17 1065.62  
 1070.06 1072.77 1085.61 1087.76 1091.35 1094.66  
 1101.53 1102.31 1102.98 1105.97 1108.62 1115.02  
 1125.11 1127.48 1128.91 1132.96 1140.02 1142.03  
 1151.20 1168.35 1178.38 1185.46 1190.19 1192.91  
 1195.92 1201.65 1207.66 1208.54 1210.36 1216.72  
 1217.81 1224.22 1237.47 1248.91 1250.87 1260.02  
 1281.12 1286.53 1288.29 1290.70 1296.36 1300.70  
 1302.01 1309.57 1311.47 1312.65 1315.53 1327.56  
 1331.52 1341.27 1352.72 1353.38 1357.51 1360.84  
 1364.03 1366.52 1367.24 1369.20 1377.02 1378.69  
 1378.72 1381.87 1390.45 1391.57 1393.14 1394.91  
 1398.00 1400.35 1402.01 1411.69 1412.02 1414.31  
 1416.82 1417.93 1422.96 1428.69 1433.14 1435.00  
 1436.40 1436.81 1465.40 1473.41 1482.18 1487.75  
 1491.68 1493.38 1495.04 1496.82 1497.71 1498.55  
 1499.33 1500.25 1501.05 1501.17 1502.05 1502.87  
 1504.61 1506.28 1507.00 1508.18 1508.93 1511.73  
 1512.57 1513.25 1515.16 1515.45 1518.25 1519.53  
 1520.98 1521.31 1524.28 1525.94 1526.93 1529.70  
 1529.93 1533.03 1541.81 1595.44 1608.21 1615.65  
 1617.98 1623.16 1649.29 1653.01 1656.30 1662.58  
 3010.84 3011.07 3017.91 3019.73 3028.04 3028.93  
 3030.50 3033.71 3035.25 3036.27 3036.82 3037.83  
 3037.95 3039.20 3039.84 3040.15 3042.22 3046.04  
 3051.08 3053.81 3059.28 3064.47 3067.02 3068.83  
 3071.44 3074.05 3076.17 3081.16 3084.49 3084.97  
 3085.13 3088.00 3088.26 3099.17 3101.56 3101.75  
 3102.34 3102.68 3107.73 3110.26 3111.54 3112.86  
 3114.98 3117.99 3119.07 3130.30 3132.88 3150.23  
 3154.73 3157.67 3159.53 3165.08 3166.31 3166.85  
 3170.13 3176.83 3177.19 3180.76 3181.47 3182.18  
 3185.49 3185.98 3191.03 3191.22 3198.70 3200.30  
 3227.07 3468.80 3584.48

3L

|         |         |         |         |         |         |
|---------|---------|---------|---------|---------|---------|
| 25.12   | 27.89   | 32.76   | 37.64   | 41.13   | 47.37   |
| 53.02   | 60.27   | 62.10   | 66.02   | 69.06   | 75.75   |
| 78.70   | 82.89   | 92.06   | 94.89   | 99.14   | 103.43  |
| 108.80  | 112.50  | 115.10  | 119.58  | 122.04  | 124.87  |
| 130.52  | 139.06  | 143.06  | 151.50  | 152.14  | 161.63  |
| 167.51  | 171.25  | 175.60  | 178.25  | 182.21  | 182.87  |
| 184.02  | 193.87  | 204.56  | 207.18  | 209.32  | 213.57  |
| 215.08  | 224.79  | 229.31  | 231.13  | 236.38  | 242.21  |
| 243.85  | 248.60  | 254.06  | 257.21  | 265.68  | 269.68  |
| 276.67  | 279.10  | 281.36  | 296.24  | 300.39  | 302.61  |
| 311.82  | 315.26  | 320.80  | 326.20  | 330.72  | 332.97  |
| 339.72  | 345.23  | 353.66  | 358.37  | 362.10  | 367.68  |
| 374.47  | 383.24  | 391.36  | 395.93  | 400.85  | 405.85  |
| 407.24  | 425.30  | 433.16  | 436.20  | 448.31  | 454.87  |
| 456.58  | 464.61  | 468.07  | 470.11  | 473.29  | 474.75  |
| 484.30  | 490.44  | 498.75  | 504.00  | 526.08  | 533.62  |
| 542.02  | 546.46  | 562.69  | 575.15  | 590.31  | 606.99  |
| 614.22  | 618.90  | 629.88  | 640.81  | 648.76  | 654.67  |
| 661.84  | 668.05  | 711.88  | 717.47  | 726.93  | 731.11  |
| 745.78  | 748.12  | 752.55  | 759.55  | 781.62  | 800.07  |
| 813.85  | 817.47  | 818.17  | 822.02  | 831.49  | 840.11  |
| 869.48  | 871.89  | 873.58  | 882.28  | 884.85  | 888.69  |
| 898.40  | 899.32  | 906.37  | 910.86  | 914.93  | 915.92  |
| 916.36  | 928.32  | 934.20  | 940.84  | 941.18  | 944.24  |
| 946.94  | 947.14  | 949.96  | 962.22  | 970.34  | 971.27  |
| 973.41  | 977.66  | 984.64  | 987.53  | 1005.95 | 1014.25 |
| 1021.69 | 1029.91 | 1030.01 | 1035.21 | 1037.31 | 1039.51 |
| 1041.36 | 1042.72 | 1043.27 | 1048.59 | 1055.11 | 1059.26 |
| 1062.30 | 1068.01 | 1071.80 | 1078.47 | 1082.08 | 1087.95 |
| 1091.44 | 1096.01 | 1098.88 | 1099.89 | 1108.26 | 1111.74 |
| 1113.01 | 1119.29 | 1130.62 | 1131.57 | 1132.76 | 1146.19 |
| 1155.43 | 1160.14 | 1177.24 | 1184.40 | 1187.07 | 1190.26 |
| 1195.23 | 1201.99 | 1204.94 | 1213.52 | 1216.73 | 1221.51 |
| 1224.78 | 1232.04 | 1234.24 | 1241.00 | 1251.85 | 1256.51 |
| 1260.21 | 1268.33 | 1278.71 | 1282.38 | 1294.69 | 1299.41 |
| 1301.55 | 1303.56 | 1307.00 | 1309.55 | 1317.69 | 1321.05 |
| 1331.77 | 1335.45 | 1337.03 | 1345.22 | 1354.35 | 1355.15 |
| 1356.78 | 1363.35 | 1365.35 | 1368.22 | 1375.27 | 1381.39 |
| 1386.49 | 1388.80 | 1391.81 | 1392.83 | 1394.29 | 1395.95 |
| 1396.57 | 1398.78 | 1401.63 | 1403.71 | 1409.99 | 1411.23 |
| 1413.43 | 1417.21 | 1419.97 | 1423.32 | 1430.74 | 1433.35 |
| 1435.59 | 1436.17 | 1440.00 | 1462.03 | 1463.36 | 1477.87 |
| 1481.00 | 1483.99 | 1487.75 | 1488.84 | 1490.30 | 1491.98 |
| 1492.92 | 1496.95 | 1497.77 | 1499.27 | 1499.66 | 1500.68 |
| 1501.08 | 1501.87 | 1502.41 | 1504.12 | 1504.94 | 1505.38 |
| 1506.04 | 1507.29 | 1510.35 | 1511.28 | 1512.06 | 1512.84 |
| 1514.93 | 1516.13 | 1516.87 | 1517.78 | 1517.93 | 1521.12 |
| 1522.13 | 1524.23 | 1527.63 | 1530.20 | 1530.86 | 1533.74 |
| 1540.45 | 1548.27 | 1584.05 | 1601.39 | 1608.54 | 1612.86 |
| 1624.43 | 1649.89 | 1653.93 | 1663.56 | 3006.95 | 3009.23 |
| 3010.66 | 3011.06 | 3020.73 | 3021.09 | 3021.24 | 3021.99 |
| 3025.73 | 3027.72 | 3029.67 | 3030.73 | 3036.05 | 3036.83 |
| 3038.04 | 3038.42 | 3038.44 | 3040.07 | 3041.03 | 3041.44 |
| 3044.06 | 3047.40 | 3061.57 | 3063.18 | 3064.55 | 3066.00 |
| 3069.58 | 3071.21 | 3073.34 | 3085.01 | 3085.44 | 3088.93 |
| 3092.13 | 3094.71 | 3096.07 | 3096.93 | 3099.05 | 3099.31 |

|         |         |         |         |         |         |
|---------|---------|---------|---------|---------|---------|
| 3100.53 | 3105.07 | 3105.64 | 3108.44 | 3108.75 | 3109.56 |
| 3112.45 | 3117.35 | 3117.65 | 3121.71 | 3122.43 | 3122.70 |
| 3131.52 | 3134.31 | 3134.63 | 3137.11 | 3142.75 | 3143.69 |
| 3144.25 | 3152.84 | 3154.21 | 3156.73 | 3160.53 | 3164.44 |
| 3166.91 | 3170.38 | 3174.58 | 3181.14 | 3191.05 | 3191.51 |
| 3197.44 | 3201.21 | 3264.76 | 3454.55 | 3577.76 | 3622.13 |

3L'

|         |         |         |         |         |         |
|---------|---------|---------|---------|---------|---------|
| 15.22   | 19.97   | 22.75   | 30.72   | 35.53   | 37.55   |
| 42.73   | 44.40   | 50.59   | 57.25   | 64.97   | 66.01   |
| 68.08   | 70.18   | 78.94   | 83.42   | 90.25   | 91.55   |
| 95.44   | 98.18   | 105.57  | 109.71  | 110.80  | 113.97  |
| 115.84  | 119.47  | 123.26  | 126.40  | 134.02  | 141.78  |
| 144.49  | 150.47  | 156.21  | 158.41  | 162.51  | 167.92  |
| 172.45  | 176.77  | 184.61  | 187.99  | 191.14  | 198.56  |
| 207.74  | 216.50  | 221.04  | 223.30  | 231.41  | 236.98  |
| 243.41  | 248.80  | 252.05  | 253.98  | 256.45  | 257.07  |
| 265.36  | 269.27  | 269.68  | 277.06  | 284.84  | 291.62  |
| 303.71  | 307.56  | 309.63  | 319.50  | 322.27  | 327.12  |
| 329.46  | 331.49  | 338.24  | 343.61  | 346.12  | 357.88  |
| 359.82  | 363.75  | 366.53  | 370.08  | 384.72  | 393.46  |
| 398.62  | 403.65  | 407.47  | 409.72  | 412.69  | 420.83  |
| 424.43  | 437.34  | 440.99  | 450.91  | 457.09  | 458.86  |
| 463.16  | 466.57  | 468.31  | 472.41  | 483.78  | 488.59  |
| 491.14  | 495.41  | 520.28  | 524.30  | 537.51  | 538.43  |
| 541.10  | 548.51  | 552.68  | 579.19  | 587.38  | 607.11  |
| 614.02  | 628.13  | 628.88  | 629.59  | 642.74  | 650.72  |
| 661.14  | 667.57  | 674.07  | 708.35  | 710.98  | 719.47  |
| 726.07  | 737.37  | 743.34  | 749.09  | 750.09  | 770.42  |
| 782.09  | 791.96  | 809.03  | 813.62  | 816.47  | 818.40  |
| 824.14  | 832.69  | 835.13  | 847.52  | 857.59  | 867.46  |
| 869.56  | 872.13  | 889.36  | 894.62  | 896.94  | 901.93  |
| 902.87  | 904.73  | 907.17  | 909.29  | 909.52  | 919.01  |
| 932.42  | 935.98  | 941.97  | 944.43  | 945.88  | 946.94  |
| 947.72  | 949.30  | 952.04  | 958.72  | 965.79  | 966.50  |
| 972.25  | 974.17  | 974.66  | 975.45  | 979.01  | 988.39  |
| 989.37  | 1009.71 | 1016.81 | 1017.23 | 1023.03 | 1027.56 |
| 1037.85 | 1040.08 | 1041.14 | 1042.07 | 1042.38 | 1045.39 |
| 1045.45 | 1047.91 | 1057.72 | 1058.08 | 1058.28 | 1066.84 |
| 1070.27 | 1073.66 | 1084.04 | 1088.22 | 1089.20 | 1093.21 |
| 1098.31 | 1100.62 | 1101.22 | 1107.52 | 1109.79 | 1117.90 |
| 1119.21 | 1122.85 | 1129.01 | 1133.78 | 1140.48 | 1148.26 |
| 1155.15 | 1160.96 | 1172.96 | 1184.93 | 1189.66 | 1192.90 |
| 1195.08 | 1199.30 | 1204.09 | 1204.85 | 1210.53 | 1215.15 |
| 1220.30 | 1222.63 | 1223.63 | 1237.22 | 1239.94 | 1247.37 |
| 1255.63 | 1267.47 | 1270.31 | 1272.43 | 1284.32 | 1285.82 |
| 1287.62 | 1299.16 | 1302.27 | 1303.12 | 1306.27 | 1307.21 |
| 1312.46 | 1314.85 | 1321.02 | 1324.83 | 1334.50 | 1338.67 |
| 1347.99 | 1350.86 | 1351.68 | 1357.17 | 1365.05 | 1366.63 |
| 1368.00 | 1372.30 | 1373.96 | 1378.47 | 1385.14 | 1388.15 |
| 1391.23 | 1391.47 | 1394.05 | 1394.97 | 1396.59 | 1399.17 |
| 1400.00 | 1400.92 | 1405.68 | 1409.59 | 1412.55 | 1413.90 |
| 1418.52 | 1420.34 | 1424.32 | 1430.27 | 1434.29 | 1434.97 |
| 1437.23 | 1438.22 | 1462.30 | 1471.57 | 1478.14 | 1484.15 |
| 1485.30 | 1488.82 | 1493.13 | 1494.13 | 1494.65 | 1498.06 |
| 1499.13 | 1499.19 | 1500.98 | 1501.83 | 1502.26 | 1502.78 |
| 1502.99 | 1503.85 | 1504.51 | 1506.88 | 1507.49 | 1508.22 |

1508.48 1509.09 1510.75 1511.76 1513.34 1514.48  
1514.92 1516.60 1517.88 1519.19 1519.60 1520.97  
1523.31 1527.93 1528.79 1530.16 1531.49 1532.62  
1538.06 1540.41 1545.46 1587.26 1599.33 1607.08  
1617.22 1623.17 1649.76 1653.46 1663.71 1673.11  
3008.38 3008.50 3011.39 3012.54 3018.60 3021.48  
3022.44 3022.64 3025.94 3028.10 3028.65 3035.57  
3035.95 3037.71 3038.95 3039.75 3040.14 3041.82  
3043.06 3045.09 3047.63 3058.56 3062.15 3063.37  
3065.49 3067.79 3069.15 3069.38 3073.69 3078.98  
3086.14 3087.31 3088.06 3093.79 3096.46 3098.35  
3099.41 3101.88 3102.91 3103.47 3104.46 3105.34  
3106.84 3108.62 3108.63 3111.05 3111.83 3115.30  
3117.58 3127.40 3133.88 3134.21 3134.96 3136.77  
3154.59 3157.86 3160.42 3160.54 3160.67 3161.67  
3164.22 3166.06 3170.14 3176.08 3176.44 3183.78  
3184.48 3185.31 3190.95 3200.27 3201.26 3201.69  
3209.61 3214.28 3214.59 3234.23 3452.72 3566.50

=====

3L-TS

=====

-1016.92 17.04 28.09 33.88 39.68 42.14  
48.82 51.02 53.02 57.06 63.33 63.99  
67.17 77.83 81.11 88.09 91.16 91.95  
101.23 104.98 108.62 110.74 115.58 118.93  
122.62 131.09 135.19 144.76 150.41 152.29  
159.94 161.30 170.05 176.23 179.93 183.51  
184.64 191.15 193.04 204.58 211.45 214.81  
224.30 226.23 228.55 235.80 240.64 243.31  
247.68 252.04 254.64 264.25 269.26 272.73  
274.62 291.17 293.57 300.67 303.20 309.01  
311.67 315.97 317.11 324.62 325.57 328.79  
337.66 341.32 353.51 357.41 366.50 369.08  
375.33 391.61 395.42 400.75 402.29 405.73  
423.01 429.07 430.19 436.70 445.20 451.88  
455.21 456.56 464.11 471.69 472.35 484.10  
488.79 490.05 492.60 501.19 507.08 526.41  
531.38 541.24 547.28 564.26 592.34 606.50  
615.45 627.31 641.78 642.27 652.67 665.46  
666.94 713.65 714.16 715.23 728.42 735.22  
746.18 749.92 758.18 763.61 781.75 787.60  
800.16 814.71 816.93 818.87 821.63 827.20  
842.17 865.73 869.34 869.76 886.20 899.53  
900.53 904.74 905.29 910.28 913.15 914.01  
916.77 917.79 924.32 936.87 940.05 944.96  
947.27 950.29 950.76 953.42 956.17 960.40  
970.81 973.14 974.03 977.28 984.55 999.85  
1013.35 1022.14 1027.95 1031.31 1035.65 1039.62  
1040.99 1042.59 1046.46 1050.22 1054.10 1055.74  
1060.48 1062.17 1065.63 1071.90 1080.08 1086.71  
1088.00 1093.16 1095.13 1099.72 1101.93 1108.07  
1110.67 1113.89 1119.43 1130.38 1131.81 1135.20  
1143.73 1153.44 1160.37 1184.54 1189.25 1190.83  
1194.46 1202.71 1204.12 1211.02 1217.26 1219.61  
1235.38 1240.95 1249.37 1253.08 1254.46 1259.56  
1262.13 1271.29 1281.30 1285.88 1298.76 1301.40  
1303.44 1305.47 1307.77 1310.55 1312.55 1319.34  
1333.97 1336.56 1337.51 1345.46 1352.75 1353.63

1356.85 1364.49 1366.41 1370.14 1376.79 1384.60  
1386.60 1388.95 1391.73 1392.88 1394.66 1398.36  
1398.66 1402.33 1404.70 1405.74 1411.97 1413.19  
1413.73 1418.06 1420.31 1428.68 1431.84 1435.01  
1436.58 1437.47 1438.15 1464.11 1466.39 1473.64  
1480.74 1485.11 1486.16 1490.54 1490.84 1492.11  
1493.28 1497.29 1497.87 1498.67 1499.97 1500.42  
1501.33 1501.75 1502.29 1503.90 1505.61 1505.81  
1506.11 1506.77 1507.71 1509.53 1510.19 1512.14  
1513.84 1515.07 1516.43 1517.59 1518.02 1520.77  
1521.91 1522.34 1525.14 1528.79 1531.11 1533.26  
1534.39 1537.09 1542.01 1586.77 1606.50 1608.30  
1610.22 1616.84 1622.81 1656.28 1757.09 3006.62  
3008.34 3009.59 3014.27 3020.14 3022.19 3026.46  
3030.47 3032.15 3033.18 3034.25 3035.00 3036.00  
3036.38 3038.70 3039.75 3040.05 3040.30 3041.85  
3045.32 3046.33 3047.11 3062.31 3064.19 3065.56  
3068.18 3069.28 3072.22 3074.13 3080.85 3091.59  
3092.44 3092.70 3096.32 3097.31 3097.46 3101.81  
3103.58 3105.27 3105.34 3106.49 3106.79 3110.94  
3111.26 3112.77 3113.06 3118.40 3120.82 3122.59  
3124.46 3129.45 3133.20 3134.28 3142.02 3145.40  
3149.73 3152.41 3157.53 3161.15 3163.72 3165.45  
3165.94 3166.46 3175.27 3176.57 3181.02 3191.52  
3193.02 3202.22 3210.02 3261.32 3513.38 3620.07

=====

3L'-TS

=====

-1063.83 21.72 28.28 30.94 34.71 36.17  
43.75 45.45 49.39 51.06 55.97 59.75  
65.40 70.31 75.64 79.95 84.88 85.65  
89.96 94.34 99.70 106.34 110.32 112.96  
114.75 115.93 120.26 123.55 134.99 138.86  
142.80 149.13 150.88 160.40 162.90 165.35  
166.77 174.69 179.08 182.63 188.21 194.32  
203.71 206.45 212.99 217.89 222.15 225.40  
229.38 239.13 239.63 246.66 249.68 251.07  
260.75 264.26 267.03 268.52 269.91 283.13  
284.64 294.24 298.98 303.26 310.58 316.47  
320.83 324.77 328.61 332.64 340.53 342.73  
352.91 359.38 361.16 368.82 377.69 381.04  
394.41 397.10 398.93 403.28 406.34 424.17  
426.17 433.10 446.66 450.28 454.25 456.48  
463.61 470.30 472.53 485.01 486.19 489.25  
492.52 496.85 504.96 514.54 518.71 526.86  
537.99 542.04 548.14 554.39 587.32 607.59  
614.47 619.39 627.89 629.47 642.31 649.75  
659.14 669.06 672.43 711.38 712.51 718.78  
720.57 739.30 744.31 752.47 758.95 770.81  
783.69 788.75 806.19 810.24 814.35 815.14  
820.83 824.75 831.69 849.63 859.11 863.88  
865.14 868.32 869.37 895.87 900.01 902.07  
903.76 905.38 905.86 909.37 911.93 912.71  
919.31 928.62 936.54 939.38 946.90 948.44  
949.73 953.68 955.05 957.32 960.08 963.93  
964.57 972.33 974.44 975.64 978.94 981.70  
987.61 1000.69 1010.93 1014.83 1022.11 1026.80  
1035.12 1041.35 1041.51 1041.97 1042.83 1046.90

1048.90 1051.48 1056.32 1056.50 1062.31 1065.17  
 1067.95 1071.75 1086.07 1087.89 1088.13 1095.75  
 1098.57 1104.19 1107.48 1108.81 1109.17 1110.67  
 1120.06 1121.14 1129.73 1133.69 1139.23 1142.55  
 1152.45 1170.91 1184.27 1191.51 1191.72 1192.71  
 1197.97 1202.21 1204.70 1208.70 1210.95 1219.83  
 1220.47 1221.82 1234.69 1239.55 1249.92 1252.31  
 1254.82 1259.06 1267.82 1275.69 1286.72 1291.80  
 1294.02 1298.45 1301.42 1303.86 1307.40 1309.91  
 1312.40 1316.37 1318.19 1334.75 1335.26 1336.90  
 1347.37 1352.69 1354.76 1357.33 1361.94 1365.42  
 1365.91 1368.60 1370.03 1376.92 1384.76 1388.72  
 1389.16 1391.85 1392.82 1394.61 1397.48 1398.80  
 1402.44 1405.36 1406.65 1411.37 1413.86 1414.45  
 1419.24 1420.49 1430.90 1432.13 1435.57 1438.23  
 1439.63 1440.34 1465.51 1472.93 1479.70 1482.74  
 1483.77 1487.71 1488.74 1491.14 1492.53 1493.36  
 1496.03 1497.85 1498.37 1498.52 1500.34 1500.70  
 1501.48 1502.31 1504.16 1505.25 1506.40 1506.79  
 1507.73 1508.72 1511.08 1511.40 1513.23 1513.98  
 1514.66 1516.52 1517.55 1518.72 1520.70 1521.99  
 1522.93 1523.81 1527.98 1530.77 1533.46 1534.01  
 1539.54 1540.90 1541.80 1554.72 1586.96 1605.08  
 1610.29 1620.50 1623.37 1641.10 1657.02 1660.87  
 1793.62 3007.24 3008.61 3010.08 3014.43 3022.32  
 3023.06 3029.05 3030.73 3034.61 3035.59 3035.98  
 3036.27 3037.82 3038.47 3038.95 3039.75 3040.48  
 3042.27 3042.50 3045.73 3047.84 3053.26 3062.88  
 3064.68 3066.58 3069.67 3070.34 3072.78 3075.20  
 3081.85 3087.61 3092.17 3093.71 3097.84 3098.71  
 3099.51 3104.94 3105.83 3107.38 3107.60 3110.80  
 3111.67 3113.04 3114.29 3119.03 3123.34 3124.16  
 3125.71 3130.23 3133.74 3135.55 3135.66 3137.24  
 3139.42 3145.82 3147.77 3148.56 3149.62 3158.23  
 3161.96 3166.51 3167.27 3169.31 3169.94 3170.46  
 3174.47 3177.42 3189.17 3190.11 3199.61 3199.80  
 3204.41 3205.74 3213.02 3224.59 3257.90 3530.38

=====

3M

=====

13.31 15.24 16.15 19.21 23.03 24.65  
 25.76 26.59 28.64 31.09 34.03 35.30  
 39.09 39.67 44.44 45.85 47.76 49.76  
 53.38 58.69 62.69 65.13 68.04 74.71  
 77.62 82.21 84.59 85.61 87.73 89.32  
 92.64 96.33 99.97 101.00 104.42 108.85  
 109.64 113.35 117.89 120.29 121.94 124.06  
 125.62 139.72 141.55 146.67 146.78 150.77  
 151.60 156.17 157.08 161.12 166.21 171.33  
 176.26 177.82 189.04 190.33 191.38 192.98  
 196.69 201.48 201.85 208.49 211.73 214.88  
 217.36 224.60 225.72 227.93 231.52 232.26  
 233.24 239.80 243.14 247.49 248.55 250.82  
 253.05 254.09 255.17 260.45 261.62 263.17  
 265.84 267.37 268.54 270.97 276.94 279.12  
 280.83 283.95 285.68 295.65 296.54 297.62  
 302.04 303.44 304.13 306.63 312.52 313.64  
 314.50 320.71 328.56 337.16 338.37 343.80

348.67 357.59 362.09 364.22 364.87 365.15  
 366.96 368.34 369.97 370.84 371.34 372.76  
 380.49 383.18 391.27 393.27 397.41 413.51  
 415.34 422.41 441.88 444.35 450.87 453.07  
 455.35 456.50 456.70 457.82 460.80 468.72  
 476.04 482.35 486.31 494.24 495.39 495.86  
 499.86 500.45 500.73 500.92 503.11 503.98  
 504.57 508.44 523.08 532.56 537.90 557.84  
 585.21 609.92 613.49 624.76 632.50 644.52  
 661.50 662.84 670.90 717.68 718.18 720.21  
 731.99 741.43 747.39 750.23 751.20 752.30  
 753.18 754.78 785.85 796.24 796.98 804.26  
 817.73 819.43 821.64 830.29 832.99 858.27  
 859.57 864.53 870.22 888.75 888.88 889.22  
 889.96 892.45 893.10 894.01 894.51 896.45  
 899.11 902.52 903.55 910.25 914.36 914.58  
 915.31 934.05 936.10 943.65 946.21 947.07  
 948.17 949.31 949.93 950.20 951.20 958.54  
 963.47 973.31 975.09 977.51 979.03 979.72  
 984.38 987.10 996.16 1003.80 1005.45 1010.67  
 1022.01 1028.77 1033.50 1033.80 1039.52 1039.87  
 1040.66 1041.03 1042.53 1042.94 1043.71 1045.29  
 1045.73 1046.81 1048.67 1050.17 1050.93 1057.19  
 1067.46 1072.95 1074.35 1081.92 1086.10 1092.03  
 1093.41 1097.71 1101.24 1102.32 1110.46 1113.15  
 1124.17 1124.71 1128.67 1131.34 1139.61 1141.57  
 1158.18 1175.22 1187.38 1190.48 1191.97 1198.55  
 1206.62 1207.37 1212.28 1214.06 1224.61 1230.01  
 1230.99 1236.08 1236.56 1239.79 1240.57 1242.53  
 1243.10 1243.37 1243.88 1244.15 1246.87 1247.26  
 1252.05 1267.42 1269.32 1282.80 1286.74 1289.46  
 1291.25 1299.72 1301.26 1309.03 1309.94 1314.60  
 1317.86 1324.72 1331.90 1341.70 1350.25 1351.95  
 1352.60 1352.75 1354.41 1356.74 1363.89 1367.99  
 1373.68 1375.96 1381.20 1385.96 1386.41 1389.62  
 1390.08 1390.64 1392.03 1392.29 1393.86 1395.83  
 1396.63 1396.74 1398.60 1398.80 1400.03 1402.35  
 1403.21 1412.27 1413.62 1414.77 1416.38 1417.16  
 1419.02 1423.29 1425.79 1428.32 1429.15 1432.91  
 1434.58 1435.44 1436.71 1463.60 1473.50 1483.21  
 1485.74 1486.36 1486.84 1487.60 1488.21 1488.55  
 1490.10 1490.83 1492.89 1493.70 1493.81 1494.48  
 1495.50 1496.13 1497.84 1497.94 1498.16 1499.58  
 1500.39 1500.87 1501.43 1501.88 1503.15 1503.36  
 1504.60 1505.85 1506.29 1506.57 1507.13 1507.98  
 1508.16 1509.09 1509.32 1509.44 1509.87 1511.86  
 1511.93 1512.64 1514.63 1515.28 1516.46 1517.63  
 1518.17 1519.31 1519.81 1521.91 1523.36 1523.96  
 1524.48 1525.46 1526.71 1528.12 1529.29 1530.49  
 1531.78 1536.08 1584.87 1601.22 1611.34 1613.93  
 1619.94 1659.28 1672.59 1730.72 2991.32 2994.73  
 3005.17 3007.61 3008.59 3009.85 3010.59 3013.46  
 3014.13 3016.06 3016.79 3017.04 3018.05 3020.41  
 3026.56 3027.99 3028.19 3029.49 3032.56 3033.88  
 3035.68 3037.35 3037.68 3037.80 3041.56 3043.05  
 3045.27 3050.49 3054.39 3055.00 3057.02 3059.92  
 3061.69 3062.13 3065.99 3066.19 3068.20 3072.48  
 3073.49 3074.85 3075.62 3076.36 3078.41 3079.32

3080.90 3082.19 3083.67 3084.99 3085.66 3087.01  
 3088.19 3089.02 3089.35 3089.76 3090.40 3090.46  
 3091.64 3093.19 3094.26 3097.44 3097.93 3099.79  
 3100.35 3100.99 3102.00 3102.07 3103.21 3103.26  
 3105.41 3108.17 3108.41 3112.28 3112.54 3115.00  
 3117.33 3117.76 3118.21 3122.40 3124.99 3127.98  
 3129.92 3131.11 3134.13 3134.42 3151.05 3156.90  
 3158.18 3160.61 3162.50 3165.96 3176.94 3177.58  
 3181.92 3185.67 3187.22 3193.37 3196.08 3206.17  
 3224.33 3298.43 3548.16

=====

3M'

=====

10.55 15.73 16.22 18.88 24.65 27.16  
 28.73 30.51 32.63 34.34 38.97 42.68  
 43.30 46.99 48.12 49.40 51.30 53.23  
 59.09 61.38 63.30 67.20 70.95 73.46  
 77.14 79.60 82.14 87.90 91.17 91.80  
 95.47 97.03 98.45 99.70 102.20 103.34  
 105.04 108.82 110.26 113.81 117.55 118.75  
 122.79 124.94 129.11 129.97 134.30 143.65  
 145.43 149.06 150.53 155.95 157.43 160.11  
 164.63 168.78 171.13 172.66 176.73 181.89  
 185.73 189.72 193.01 194.25 197.70 200.33  
 204.43 209.54 215.06 215.44 218.29 222.90  
 225.48 230.58 231.25 232.46 238.75 240.15  
 241.66 244.59 247.66 247.70 249.67 250.95  
 254.10 255.60 257.67 261.29 262.14 266.60  
 269.67 271.88 274.21 278.42 280.17 283.40  
 284.75 287.53 295.03 296.60 299.42 302.60  
 303.71 305.15 305.66 312.18 312.78 314.63  
 321.60 322.29 332.80 337.46 347.88 363.31  
 364.62 365.20 365.45 365.80 369.83 370.91  
 372.21 372.48 373.66 375.77 380.97 391.02  
 392.77 399.08 413.79 415.58 420.60 426.50  
 432.29 441.27 445.45 451.76 453.68 457.24  
 457.48 459.74 467.02 468.07 474.16 476.55  
 482.42 486.81 491.15 493.23 495.51 497.46  
 498.58 499.13 500.27 501.36 502.61 503.50  
 509.52 523.78 532.92 538.02 557.51 557.91  
 575.87 585.71 610.74 612.94 623.87 632.26  
 635.77 644.42 662.00 666.71 671.11 709.16  
 713.16 717.59 720.49 724.61 732.30 742.75  
 748.85 749.44 751.11 752.89 753.04 772.72  
 785.41 797.81 804.83 817.63 819.80 821.19  
 829.40 830.75 832.90 847.16 853.37 858.26  
 864.11 870.61 888.23 888.70 889.25 891.03  
 892.39 892.63 893.29 894.04 898.13 898.73  
 903.43 903.57 909.83 910.37 913.83 915.01  
 915.20 933.67 935.41 944.23 946.68 946.99  
 947.45 948.80 950.05 950.58 951.29 959.41  
 963.50 973.49 973.57 975.09 975.68 976.67  
 977.94 979.18 982.46 991.79 993.00 1003.81  
 1006.85 1009.89 1018.01 1021.88 1029.34 1033.74  
 1034.87 1040.11 1040.60 1040.96 1042.69 1043.00  
 1043.81 1043.85 1044.48 1046.32 1046.62 1046.77  
 1050.03 1052.39 1055.01 1055.51 1066.81 1073.41  
 1074.73 1080.89 1086.29 1090.84 1093.57 1099.12

1100.76 1102.05 1109.69 1111.00 1112.96 1124.10  
 1124.57 1128.59 1131.46 1140.48 1141.98 1158.76  
 1175.52 1186.89 1190.73 1192.22 1193.70 1199.02  
 1205.38 1206.06 1207.33 1212.58 1214.63 1217.79  
 1224.83 1229.76 1234.62 1236.15 1237.05 1237.19  
 1239.02 1241.16 1242.22 1242.54 1242.68 1243.11  
 1245.66 1247.57 1253.17 1254.48 1267.63 1268.62  
 1283.12 1286.75 1289.57 1290.95 1298.99 1300.85  
 1301.48 1308.91 1309.95 1314.51 1318.27 1323.43  
 1333.62 1341.65 1349.68 1351.44 1352.26 1353.26  
 1356.85 1363.40 1363.71 1368.26 1373.47 1375.23  
 1381.17 1386.26 1390.12 1391.71 1392.43 1393.54  
 1393.65 1395.42 1396.77 1396.91 1397.75 1397.81  
 1399.22 1399.67 1401.56 1404.07 1405.03 1406.11  
 1412.15 1413.91 1414.53 1417.51 1417.96 1419.55  
 1424.03 1428.21 1430.11 1431.56 1433.31 1434.85  
 1436.08 1437.01 1464.13 1473.61 1477.93 1483.25  
 1483.71 1485.63 1486.13 1486.83 1487.59 1488.10  
 1488.96 1490.67 1492.82 1493.25 1493.60 1493.72  
 1494.82 1496.39 1497.04 1498.41 1499.99 1500.19  
 1500.82 1501.36 1502.19 1502.73 1503.60 1503.98  
 1505.32 1506.34 1506.78 1507.12 1507.46 1507.55  
 1508.13 1508.83 1509.01 1509.73 1510.24 1510.40  
 1512.70 1514.43 1515.14 1515.89 1516.81 1518.51  
 1518.77 1519.73 1521.23 1522.14 1523.47 1523.81  
 1524.80 1525.78 1526.24 1527.03 1529.13 1529.38  
 1531.49 1535.70 1538.92 1584.08 1600.54 1611.10  
 1614.26 1618.69 1645.59 1657.25 1659.06 1737.28  
 2988.58 3000.27 3004.41 3008.37 3008.80 3009.43  
 3011.65 3012.63 3013.20 3013.73 3016.56 3018.50  
 3019.67 3022.17 3026.68 3028.14 3029.08 3032.12  
 3032.23 3033.03 3034.58 3036.75 3036.95 3037.30  
 3040.73 3042.50 3045.35 3049.01 3054.51 3056.89  
 3058.43 3061.59 3065.36 3065.60 3065.79 3067.46  
 3067.53 3071.20 3073.42 3074.83 3076.25 3076.31  
 3078.84 3080.52 3080.58 3082.18 3082.61 3083.18  
 3085.59 3086.15 3086.47 3089.07 3089.09 3090.34  
 3090.37 3093.07 3093.49 3095.60 3097.85 3097.87  
 3099.67 3100.60 3101.22 3102.34 3102.77 3107.13  
 3107.38 3109.93 3111.38 3113.88 3113.99 3115.23  
 3116.23 3116.57 3118.53 3119.88 3121.45 3121.86  
 3123.50 3123.92 3130.78 3131.74 3132.41 3133.89  
 3151.18 3155.52 3156.94 3159.56 3161.40 3164.02  
 3171.68 3179.91 3180.82 3182.15 3182.21 3184.90  
 3185.55 3191.08 3192.53 3195.96 3198.43 3212.45  
 3220.47 3222.42 3235.70

=====

3M-TS

=====

-711.52 8.48 11.76 16.29 18.73 21.63  
 23.02 23.79 27.62 28.54 29.35 31.03  
 34.41 37.45 38.36 41.30 43.19 43.53  
 47.84 49.57 56.98 59.87 62.54 67.25  
 68.28 71.19 78.05 83.83 84.70 85.86  
 89.34 89.68 92.26 97.24 99.44 101.71  
 103.81 106.76 108.69 111.87 112.85 116.59  
 121.78 124.80 125.28 131.43 140.50 145.96  
 146.77 148.12 153.40 154.37 160.21 163.32



166.77 168.45 170.81 174.16 181.32 188.96  
 192.78 196.61 198.66 199.51 210.55 215.17  
 216.47 218.97 222.21 224.95 226.18 233.90  
 236.00 238.08 239.38 241.87 246.75 248.62  
 249.04 253.05 253.77 255.47 257.03 258.46  
 260.37 263.44 265.78 267.71 270.88 275.74  
 277.05 279.48 283.65 290.07 295.25 296.07  
 298.76 299.17 301.89 302.58 304.27 307.91  
 313.35 314.81 321.60 321.75 331.29 332.73  
 344.11 348.78 359.37 363.02 363.88 364.85  
 366.57 367.30 369.21 369.87 371.00 371.86  
 380.05 385.18 388.39 390.68 398.24 412.45  
 416.29 422.81 436.80 441.20 443.20 446.68  
 450.66 454.06 455.84 457.44 463.13 468.28  
 473.13 482.65 485.40 491.85 493.18 496.37  
 497.55 498.05 501.51 502.53 503.36 505.27  
 509.26 517.86 521.27 531.07 537.13 555.19  
 585.37 608.28 609.48 625.22 632.86 643.20  
 661.39 667.39 670.40 694.14 705.36 719.06  
 719.81 742.88 748.81 751.70 752.35 753.99  
 755.33 772.53 782.41 794.87 804.33 817.53  
 818.80 822.23 827.90 832.90 853.96 861.00  
 864.75 869.95 878.61 890.49 890.80 891.50  
 891.90 892.81 892.97 893.03 898.85 902.33  
 903.90 908.82 910.55 913.83 915.07 915.33  
 917.23 918.69 934.06 935.54 942.69 945.58  
 947.22 947.87 948.58 950.92 951.10 956.82  
 957.87 961.18 961.23 973.52 974.64 977.07  
 978.21 980.81 990.86 996.13 999.92 1007.26  
 1010.43 1022.22 1028.41 1036.96 1039.07 1040.67  
 1040.92 1041.79 1042.12 1043.09 1043.31 1044.78  
 1045.18 1047.29 1047.38 1048.20 1050.20 1058.64  
 1059.40 1069.01 1072.83 1074.17 1083.47 1086.22  
 1092.97 1093.59 1097.03 1101.33 1102.11 1110.20  
 1117.30 1123.73 1124.47 1129.33 1131.58 1138.04  
 1141.43 1157.78 1174.19 1185.57 1190.08 1191.88  
 1197.79 1207.34 1208.21 1212.16 1214.08 1224.52  
 1231.38 1234.37 1234.42 1240.65 1241.41 1241.85  
 1242.76 1243.46 1244.32 1244.56 1246.16 1256.26  
 1260.37 1262.65 1267.05 1273.33 1282.27 1286.36  
 1288.92 1291.46 1299.97 1301.25 1308.19 1308.80  
 1315.24 1318.39 1325.11 1332.02 1341.02 1349.58  
 1351.56 1352.60 1353.07 1357.38 1364.54 1367.81  
 1373.32 1375.91 1382.03 1386.36 1388.40 1390.02  
 1391.82 1393.45 1395.79 1395.89 1396.50 1396.96  
 1397.70 1398.01 1398.68 1399.03 1399.75 1401.82  
 1410.13 1412.20 1413.15 1414.00 1417.37 1418.43  
 1422.83 1423.88 1424.07 1426.19 1432.70 1433.21  
 1434.31 1435.48 1436.58 1446.72 1463.31 1473.74  
 1482.76 1483.14 1485.44 1485.57 1485.83 1486.19  
 1486.87 1487.16 1488.46 1489.11 1491.29 1491.77  
 1492.16 1495.46 1495.96 1497.26 1497.87 1499.41  
 1499.88 1500.49 1501.07 1501.65 1502.39 1503.84  
 1503.96 1505.39 1506.08 1506.25 1506.82 1507.23  
 1507.47 1507.73 1508.10 1508.61 1509.01 1509.64  
 1510.23 1511.01 1511.46 1512.38 1512.94 1513.56  
 1516.91 1517.67 1518.35 1519.16 1519.78 1520.89  
 1521.87 1524.43 1524.94 1525.23 1526.25 1527.43

1527.86 1533.91 1536.73 1585.07 1606.83 1607.93  
 1611.70 1613.15 1619.39 1658.50 1766.16 3000.40  
 3001.62 3005.77 3009.05 3009.16 3009.63 3010.29  
 3011.29 3011.78 3012.42 3013.69 3019.78 3021.74  
 3024.11 3027.00 3027.19 3030.37 3030.89 3033.30  
 3034.22 3035.52 3037.28 3037.38 3037.72 3040.74  
 3041.91 3044.50 3045.93 3049.93 3053.43 3056.15  
 3059.11 3064.25 3064.55 3065.97 3067.21 3068.38  
 3071.21 3072.09 3072.48 3074.40 3074.92 3075.88  
 3079.33 3080.66 3081.27 3083.07 3084.34 3084.35  
 3084.99 3088.63 3088.92 3089.06 3089.61 3090.94  
 3091.29 3094.82 3096.39 3096.65 3096.83 3099.43  
 3101.04 3101.33 3102.16 3102.39 3103.51 3104.05  
 3107.35 3107.68 3107.95 3113.12 3114.84 3115.29  
 3117.25 3117.91 3119.24 3124.52 3125.36 3128.65  
 3130.86 3132.63 3134.12 3138.09 3139.02 3153.06  
 3156.46 3156.66 3158.59 3160.95 3164.26 3166.45  
 3170.97 3182.64 3185.89 3187.02 3187.60 3191.72  
 3206.99 3445.05 3541.70

3M'-TS

-516.30 10.15 18.49 19.72 22.55 22.86  
 25.23 29.53 32.01 33.71 35.66 37.46  
 40.06 42.33 42.66 43.33 48.69 50.37  
 52.00 57.18 58.93 60.30 64.24 69.07  
 70.44 74.49 75.68 78.32 80.75 83.77  
 86.70 87.53 89.11 91.22 93.56 95.79  
 96.87 100.09 101.74 103.49 108.26 112.47  
 114.68 118.00 122.63 125.00 126.95 130.32  
 134.45 138.33 145.00 149.91 152.73 155.69  
 157.41 159.09 161.61 164.56 168.02 170.84  
 174.72 180.23 186.23 190.23 193.23 196.31  
 202.53 208.60 213.47 216.99 218.63 220.71  
 222.46 226.31 227.52 233.21 235.30 237.20  
 242.16 242.40 243.88 245.07 246.63 249.23  
 249.85 250.82 252.75 255.48 256.23 265.00  
 266.23 271.25 272.13 276.95 278.33 279.67  
 283.89 286.77 289.11 293.05 295.98 298.08  
 298.70 300.79 304.74 305.82 307.11 307.15  
 313.07 317.60 321.36 327.46 330.06 335.22  
 357.30 363.00 364.15 364.35 366.31 368.41  
 370.05 370.62 371.50 373.59 377.75 379.88  
 389.17 392.04 400.82 403.78 414.71 421.55  
 425.67 430.42 441.74 444.63 446.88 450.97  
 454.59 455.78 456.86 458.52 468.02 469.04  
 477.59 479.46 482.96 489.46 493.70 494.59  
 496.15 497.52 499.66 499.96 501.16 505.28  
 509.72 524.80 528.54 533.18 549.09 555.76  
 566.75 582.98 608.48 610.97 620.24 626.80  
 628.45 642.46 656.20 659.92 671.30 699.14  
 707.66 711.27 716.83 723.09 737.77 744.70  
 747.01 750.88 751.27 752.84 775.46 783.14  
 784.41 788.18 805.92 814.02 816.81 819.37  
 824.88 827.83 832.00 842.27 852.68 856.29  
 863.13 868.38 882.07 885.41 890.58 891.52  
 892.70 892.86 893.41 894.49 897.91 903.21  
 904.17 904.47 907.65 910.63 912.60 914.30

915.78 919.06 929.44 933.99 944.14 946.45  
947.37 947.56 947.92 949.51 950.62 954.61  
957.64 959.19 967.17 968.21 968.79 973.17  
973.94 977.74 979.27 985.77 990.07 992.86  
994.95 1000.15 1006.75 1009.09 1020.95 1022.59  
1028.91 1032.69 1039.13 1039.95 1042.71 1043.03  
1043.53 1043.98 1044.34 1044.93 1045.97 1047.18  
1050.59 1051.26 1054.31 1056.40 1057.51 1064.28  
1067.37 1072.83 1079.02 1085.87 1091.14 1093.24  
1100.35 1102.39 1103.79 1106.04 1111.11 1113.39  
1123.97 1126.00 1129.46 1132.09 1138.33 1142.26  
1150.33 1175.41 1184.59 1190.24 1190.74 1192.27  
1200.19 1204.24 1207.66 1208.61 1210.45 1219.06  
1223.51 1231.27 1234.99 1236.88 1238.49 1239.99  
1241.32 1241.45 1241.94 1242.15 1242.79 1243.32  
1244.68 1244.72 1254.47 1257.62 1260.13 1278.10  
1283.00 1284.08 1288.97 1290.46 1291.04 1298.66  
1302.40 1307.41 1309.85 1310.12 1318.89 1320.51  
1322.44 1342.70 1352.13 1353.85 1354.53 1356.98  
1357.45 1358.87 1362.77 1369.83 1374.10 1376.64  
1385.48 1388.93 1389.19 1391.57 1393.07 1394.30  
1396.23 1396.54 1396.94 1398.00 1398.52 1398.64  
1400.01 1402.04 1402.67 1403.57 1411.22 1412.67  
1414.47 1416.89 1417.29 1417.97 1421.57 1423.30  
1424.19 1425.24 1433.25 1433.32 1435.36 1436.47  
1437.02 1438.07 1445.12 1464.32 1470.80 1478.37  
1481.71 1484.79 1485.08 1486.01 1486.37 1486.58  
1487.52 1488.25 1488.91 1489.10 1490.19 1491.33  
1492.78 1492.83 1494.88 1496.18 1497.02 1497.76  
1499.50 1500.58 1500.66 1501.19 1501.60 1502.26  
1502.95 1503.45 1504.32 1506.25 1507.35 1507.71  
1508.36 1508.53 1508.85 1509.22 1510.30 1510.74  
1511.17 1511.94 1512.81 1513.42 1514.44 1515.24  
1515.73 1518.53 1518.75 1518.88 1519.59 1520.50  
1521.86 1523.71 1524.94 1525.59 1527.77 1528.27  
1529.82 1533.29 1533.84 1534.15 1586.76 1608.67  
1610.24 1616.21 1621.61 1622.90 1652.66 1656.77  
1717.55 2991.72 3004.12 3008.09 3008.87 3009.11  
3009.81 3013.13 3013.24 3014.17 3015.63 3018.84  
3019.44 3021.45 3022.76 3023.30 3026.94 3027.49  
3031.99 3033.23 3035.34 3036.47 3036.77 3037.44  
3039.70 3040.28 3042.70 3043.17 3047.08 3047.66  
3051.87 3052.60 3054.09 3062.93 3063.30 3064.13  
3065.10 3066.22 3067.79 3070.91 3073.09 3073.17  
3074.67 3077.97 3080.38 3081.07 3081.61 3081.90  
3082.44 3083.97 3084.53 3086.39 3087.61 3087.66  
3089.02 3089.98 3091.77 3092.46 3092.83 3095.70  
3097.78 3099.38 3100.68 3100.94 3101.57 3102.93  
3107.53 3107.58 3108.98 3111.73 3112.85 3113.72  
3113.88 3116.73 3118.69 3118.93 3119.16 3121.21  
3126.73 3127.72 3130.99 3131.41 3133.36 3136.56  
3145.63 3150.75 3153.75 3155.77 3155.85 3165.59  
3166.29 3168.04 3174.72 3181.35 3182.55 3185.16  
3186.36 3188.87 3193.94 3200.96 3201.79 3202.37  
3215.92 3228.11 3479.68

=====  
3N  
=====

24.73 26.16 35.13 39.27 44.88 46.71  
47.09 54.04 55.30 60.56 65.02 67.10  
69.24 76.00 79.30 90.29 92.40 95.28  
99.32 105.31 109.23 117.99 120.34 123.76  
133.99 140.11 144.01 144.45 149.63 151.78  
160.02 163.99 166.42 169.20 178.89 183.28  
189.72 192.21 198.43 207.51 208.93 212.64  
219.61 226.31 229.08 238.62 243.16 246.18  
250.57 255.81 262.95 269.89 279.43 287.03  
289.95 295.29 299.75 301.35 303.04 309.38  
310.65 312.67 324.84 325.67 334.39 335.98  
342.91 360.66 362.06 375.01 380.92 396.33  
401.60 403.99 409.72 417.34 422.28 433.98  
446.73 453.23 457.79 465.13 467.38 472.09  
475.73 484.32 485.93 493.23 496.47 504.68  
515.82 530.07 533.11 538.41 553.20 583.46  
609.66 610.23 624.55 629.43 636.60 645.70  
656.75 671.18 673.18 711.44 717.53 718.93  
743.76 750.37 756.42 783.18 792.23 809.80  
813.16 818.28 822.41 828.08 830.30 843.92  
857.97 864.06 866.09 871.19 872.75 892.70  
896.33 899.20 900.67 905.05 911.23 912.11  
914.75 916.53 922.98 936.46 941.41 945.99  
947.30 949.02 953.92 958.79 963.94 972.89  
973.11 973.88 983.34 983.49 998.63 1010.25  
1022.96 1030.11 1030.62 1033.24 1037.83 1041.38  
1043.04 1045.48 1047.31 1056.99 1061.03 1062.90  
1069.66 1069.97 1074.23 1085.18 1087.40 1089.64  
1092.14 1094.96 1101.86 1108.38 1109.15 1111.95  
1113.52 1119.63 1121.40 1126.46 1128.50 1132.67  
1139.70 1144.52 1149.52 1153.43 1155.26 1173.72  
1184.16 1189.07 1193.56 1198.52 1205.51 1206.95  
1210.30 1211.68 1223.11 1240.08 1241.65 1249.05  
1255.87 1273.91 1280.72 1283.62 1291.33 1293.05  
1298.36 1300.94 1304.59 1308.63 1316.35 1316.43  
1318.22 1321.10 1326.40 1336.05 1341.10 1342.42  
1348.22 1349.97 1350.24 1351.75 1357.17 1367.61  
1368.21 1372.12 1374.58 1378.65 1383.19 1391.44  
1393.44 1394.12 1395.10 1395.62 1398.85 1400.25  
1405.81 1407.18 1410.46 1413.31 1415.02 1416.07  
1421.52 1423.05 1434.33 1435.48 1436.33 1437.57  
1437.96 1438.57 1463.18 1470.96 1483.01 1487.28  
1490.84 1491.05 1492.29 1494.15 1495.57 1497.48  
1500.02 1500.29 1501.38 1501.87 1501.88 1502.85  
1504.06 1505.08 1506.09 1507.28 1507.49 1508.43  
1510.09 1510.61 1512.02 1512.53 1513.78 1516.87  
1517.83 1519.17 1519.61 1523.13 1523.46 1527.97  
1529.37 1531.49 1534.89 1536.87 1539.98 1586.10  
1604.96 1607.65 1615.67 1620.17 1653.07 2987.76  
2999.75 3000.12 3005.11 3013.46 3014.51 3020.34  
3024.58 3025.52 3027.63 3029.13 3030.41 3032.34  
3032.59 3034.87 3038.52 3039.14 3039.51 3039.57  
3047.41 3047.95 3050.79 3051.96 3060.10 3064.78  
3067.58 3070.15 3073.26 3073.82 3074.11 3077.59  
3083.26 3089.02 3094.26 3095.68 3096.01 3096.52  
3097.25 3098.73 3101.27 3102.35 3103.44 3107.82  
3108.33 3108.80 3112.98 3117.69 3118.86 3121.77  
3122.95 3131.19 3135.07 3136.06 3142.05 3150.00

3154.59 3156.45 3157.61 3160.16 3161.73 3163.34  
 3168.77 3174.66 3178.74 3185.43 3194.57 3195.71  
 3204.41 3269.18 3272.80

### 6.3. Computed energies of DFT-optimized structures

|                                                      | E(SCF)/(eV)          | ZPE/(kcal mol <sup>-1</sup> ) | S(gas)/(cal mol <sup>-1</sup> ) | G(solv)/(kcal mol <sup>-1</sup> ) |
|------------------------------------------------------|----------------------|-------------------------------|---------------------------------|-----------------------------------|
|                                                      | cc-pVTZ(-f)/LACV3P** | 6-31G**/LACVP**               | 6-31G**/LACVP**                 | 6-31G**/LACVP**                   |
| <b>PhCl</b>                                          | -18829.236           | 57.19                         | 74.832                          | -1.16                             |
| <b>NH<sub>3</sub></b>                                | -1539.719            | 21.61                         | 45.977                          | -3.44                             |
| <b>NH<sub>2</sub>Ph</b>                              | -7828.959            | 73.65                         | 75.469                          | -3.37                             |
| <b>NHPh<sub>2</sub></b>                              | -14118.159           | 124.45                        | 101.41                          | -3.07                             |
| <b>NaO<sup>t</sup>Bu</b>                             | -10761.67            | 78.01                         | 88.598                          | -19.04                            |
| <b>(NaO<sup>t</sup>Bu)<sub>4</sub></b>               | -43054.637           | 315.12                        | 222.23                          | -5.83                             |
| <b>Na<sub>4</sub>(O<sup>t</sup>Bu)<sub>3</sub>Cl</b> | -49234.625           | 237.55                        | 200.79                          | -12.79                            |
| <b>HO<sup>t</sup>Bu</b>                              | -6361.349            | 85.47                         | 76.633                          | -2.47                             |
| <b>NaCl</b>                                          | -16941.986           | 0.51                          | 54.88                           | -22.69                            |
| <b>1,4-dioxane</b>                                   | -8375.044            | 76.98                         | 72.58                           | -2.58                             |
| <b>L1_0</b>                                          | -66607.352           | 530.09                        | 257.78                          | -6.05                             |
| <b>L1_10</b>                                         | -66607.352           | 529.97                        | 258.37                          | -6.05                             |
| <b>L1_20</b>                                         | -66607.313           | 529.89                        | 258.64                          | -6.04                             |
| <b>L1_30</b>                                         | -66607.336           | 529.90                        | 257.61                          | -6.19                             |
| <b>L1_40</b>                                         | -66607.234           | 529.85                        | 259.33                          | -6.17                             |
| <b>L1_50</b>                                         | -66607.141           | 530.28                        | 257.01                          | -6.11                             |
| <b>L1_60</b>                                         | -66607.023           | 530.57                        | 255.75                          | -5.70                             |
| <b>L1_70</b>                                         | -66606.844           | 529.70                        | 258.89                          | -6.96                             |
| <b>L1_80</b>                                         | -66606.867           | 529.80                        | 258.32                          | -7.04                             |
| <b>L1_90</b>                                         | -66606.922           | 529.61                        | 259.96                          | -7.17                             |
| <b>L1_100</b>                                        | -66606.906           | 529.65                        | 260.22                          | -7.24                             |
| <b>L1_110</b>                                        | -66606.906           | 530.11                        | 262.26                          | -7.96                             |
| <b>L1_120</b>                                        | -66606.938           | 529.97                        | 261.85                          | -8.13                             |
| <b>L1_130</b>                                        | -66606.898           | 530.13                        | 259.34                          | -7.74                             |
| <b>L1_140</b>                                        | -66606.945           | 530.07                        | 260.60                          | -7.73                             |
| <b>L1_150</b>                                        | -66606.898           | 529.81                        | 260.78                          | -7.57                             |
| <b>L1_160</b>                                        | -66606.891           | 529.79                        | 259.71                          | -7.53                             |
| <b>L1_170</b>                                        | -66606.859           | 529.81                        | 260.27                          | -7.48                             |
| <b>L1_180</b>                                        | -66606.91            | 529.85                        | 260.41                          | -7.34                             |

|                          |            |        |        |       |
|--------------------------|------------|--------|--------|-------|
| <b>L2_0</b>              | -66579.820 | 519.77 | 269.14 | -6.51 |
| <b>L2_10</b>             | -66579.766 | 519.78 | 270.34 | -6.53 |
| <b>L2_20</b>             | -66579.703 | 519.70 | 269.93 | -6.68 |
| <b>L2_30</b>             | -66579.563 | 519.53 | 272.35 | -6.49 |
| <b>L2_40</b>             | -66579.469 | 519.50 | 271.80 | -6.70 |
| <b>L2_50</b>             | -66579.305 | 519.45 | 273.08 | -6.61 |
| <b>L2_60</b>             | -66579.148 | 519.40 | 268.59 | -6.49 |
| <b>L2_70</b>             | -66579.047 | 519.46 | 269.97 | -6.71 |
| <b>L2_70<sup>a</sup></b> | -3243.364  | -      | -      | -     |
| <b>L2_70<sup>b</sup></b> | -63368.340 | -      | -      | -     |
| <b>L2_80</b>             | -66579.016 | 519.64 | 272.21 | -7.58 |
| <b>L2_90</b>             | -66579.016 | 519.46 | 273.15 | -7.66 |
| <b>L2_100</b>            | -66579.109 | 519.01 | 277.38 | -7.75 |
| <b>L2_110</b>            | -66579.141 | 519.08 | 278.64 | -7.96 |
| <b>L2_120</b>            | -66579.141 | 519.04 | 275.94 | -8.30 |
| <b>L2_130</b>            | -66579.148 | 519.15 | 275.07 | -8.28 |
| <b>L2_140</b>            | -66579.172 | 519.52 | 272.34 | -8.30 |
| <b>L2_150</b>            | -66579.234 | 519.65 | 271.12 | -8.33 |
| <b>L2_160</b>            | -66579.133 | 519.47 | 274.01 | -8.21 |
| <b>L2_170</b>            | -66579.172 | 519.42 | 272.30 | -8.39 |
| <b>L2_180</b>            | -66579.211 | 519.37 | 272.06 | -8.34 |
| <b>L3_0</b>              | -72935.414 | 603.43 | 286.11 | -6.40 |
| <b>L3_10</b>             | -72935.414 | 603.41 | 285.46 | -6.44 |
| <b>L3_20</b>             | -72935.336 | 603.30 | 286.01 | -6.44 |
| <b>L3_30</b>             | -72935.258 | 603.13 | 287.76 | -6.16 |
| <b>L3_40</b>             | -72935.070 | 603.04 | 288.77 | -6.21 |
| <b>L3_50</b>             | -72934.875 | 603.04 | 288.63 | -6.00 |
| <b>L3_60</b>             | -72934.758 | 602.79 | 288.41 | -6.01 |
| <b>L3_70</b>             | -72934.477 | 602.56 | 287.81 | -6.61 |
| <b>L3_70<sup>a</sup></b> | -6421.101  | -      | -      | -     |
| <b>L3_70<sup>b</sup></b> | -66545.961 | -      | -      | -     |
| <b>L3_80</b>             | -72934.633 | 603.66 | 284.71 | -7.49 |
| <b>L3_90</b>             | -72934.641 | 603.71 | 284.33 | -7.49 |
| <b>L3_100</b>            | -72934.625 | 603.54 | 286.80 | -7.44 |

|               |             |         |         |       |
|---------------|-------------|---------|---------|-------|
| <b>L3_110</b> | -72934.719  | 602.84  | 287.48  | -7.66 |
| <b>L3_120</b> | -72934.836  | 603.18  | 287.04  | -7.73 |
| <b>L3_130</b> | -72934.914  | 603.17  | 288.37  | -7.73 |
| <b>L3_140</b> | -72934.805  | 602.83  | 290.78  | -8.11 |
| <b>L3_150</b> | -72934.945  | 603.35  | 286.36  | -7.75 |
| <b>L3_160</b> | -72934.891  | 603.35  | 286.18  | -7.80 |
| <b>L3_170</b> | -72934.750  | 603.45  | 286.75  | -7.93 |
| <b>L3_180</b> | -72934.719  | 603.70  | 286.27  | -7.96 |
| <b>L4_0</b>   | -68626.602  | 523.21  | 269.44  | -6.98 |
| <b>L4_10</b>  | -68626.547  | 522.89  | 270.25  | -7.01 |
| <b>L4_20</b>  | -68626.445  | 522.78  | 270.86  | -6.94 |
| <b>L4_30</b>  | -68626.281  | 522.68  | 272.70  | -6.83 |
| <b>L4_40</b>  | -68626.063  | 522.73  | 271.55  | -6.52 |
| <b>L4_50</b>  | -68626.016  | 522.95  | 270.03  | -7.04 |
| <b>L4_60</b>  | -68625.813  | 522.84  | 271.98  | -7.03 |
| <b>L4_70</b>  | -68625.563  | 522.65  | 274.29  | -7.22 |
| <b>L4_80</b>  | -68625.289  | 522.65  | 274.82  | -7.64 |
| <b>L4_90</b>  | -68625.391  | 522.68  | 273.56  | -8.26 |
| <b>L4_100</b> | -68625.500  | 522.84  | 271.01  | -8.31 |
| <b>L4_110</b> | -68625.813  | 522.94  | 274.64  | -8.18 |
| <b>L4_120</b> | -68625.953  | 522.93  | 273.34  | -8.33 |
| <b>L4_130</b> | -68626.070  | 523.10  | 266.33  | -8.40 |
| <b>L4_140</b> | -68626.148  | 523.30  | 272.37  | -8.37 |
| <b>L4_150</b> | -68626.164  | 523.36  | 272.52  | -8.51 |
| <b>L4_160</b> | -68626.141  | 523.37  | 271.90  | -8.43 |
| <b>L4_170</b> | -68626.102  | 523.73  | 262.78  | -8.28 |
| <b>L4_180</b> | -68626.000  | 523.78  | 268.79  | -8.17 |
| <b>1</b>      | -66606.650  | 528.77  | 263.283 | -2.3  |
| <b>1-TS</b>   | -66606.203  | 528.40  | 261.235 | -2.81 |
| <b>1A</b>     | -66607.492  | 530.08  | 256.55  | -6.34 |
| <b>1B</b>     | -66607.086  | 530.439 | 257.986 | -7.26 |
| <b>1C</b>     | -68147.945  | 555.15  | 269.89  | -7.33 |
| <b>1C'</b>    | -74437.234  | 606.09  | 290.43  | -6.50 |
| <b>1D</b>     | -111203.906 | 871.32  | 444.26  | -7.99 |

|                       |             |         |         |       |
|-----------------------|-------------|---------|---------|-------|
| <b>1D'</b>            | -117493.305 | 922.54  | 460.86  | -6.03 |
| <b>1D-TS</b>          | -111203.477 | 868.48  | 439.98  | -8.39 |
| <b>1D'-TS</b>         | -117493.031 | 919.29  | 460.38  | -5.94 |
| <b>1E</b>             | -111203.461 | 870.16  | 446.08  | -8.36 |
| <b>1E'</b>            | -117493.078 | 921.28  | 461.68  | -6.48 |
| <b>1F</b>             | -104841.719 | 784.03  | 404.52  | -6.50 |
| <b>1F'</b>            | -111131.383 | 835.05  | 429.05  | -6.96 |
| <b>1G</b>             | -55605.180  | 545.00  | 259.25  | -5.98 |
| <b>1G'</b>            | -61894.832  | 596.15  | 280.39  | -5.61 |
| <b>1H</b>             | -55605.586  | 544.91  | 257.30  | -3.12 |
| <b>1H'</b>            | -61895.311  | 596.30  | 280.85  | -3.78 |
| <b>1H-TS</b>          | -55604.932  | 544.43  | 256.779 | -2.90 |
| <b>1H'-TS</b>         | -61894.589  | 595.80  | 277.65  | -3.52 |
| <b>1I</b>             | -55606.592  | 546.71  | 261.03  | -3.40 |
| <b>1I'</b>            | -61895.863  | 597.20  | 282.87  | -2.98 |
| <b>1J</b>             | -66606.977  | 530.502 | 256.373 | -5.97 |
| <b>1K</b>             | -74982.938  | 608.97  | 285.05  | -7.04 |
| <b>2</b>              | -66579.164  | 518.29  | 270.42  | -2.80 |
| <b>2-TS</b>           | -66578.695  | 518.21  | 271.38  | -3.15 |
| <b>2A</b>             | -66579.836  | 519.74  | 269.49  | -6.49 |
| <b>2A<sup>a</sup></b> | -3243.407   | -       | -       | -     |
| <b>2A<sup>b</sup></b> | -63368.879  | -       | -       | -     |
| <b>2B</b>             | -66579.297  | 519.821 | 271.11  | -7.76 |
| <b>2C</b>             | -68120.195  | 544.018 | 284.134 | -7.99 |
| <b>2C'</b>            | -74409.516  | 595.284 | 305.666 | -7.11 |
| <b>2D</b>             | -111176.195 | 861.32  | 455.90  | -8.70 |
| <b>2D'</b>            | -117465.523 | 912.51  | 463.66  | -7.38 |
| <b>2E</b>             | -104814.039 | 773.83  | 416.41  | -6.76 |
| <b>2E'</b>            | -111103.742 | 825.09  | 439.08  | -6.86 |
| <b>2F</b>             | -55577.332  | 534.20  | 273.60  | -6.43 |
| <b>2F'</b>            | -61866.969  | 584.68  | 296.77  | -6.01 |
| <b>2G</b>             | -55578.031  | 534.77  | 267.20  | -3.84 |
| <b>2G'</b>            | -61867.715  | 585.66  | 292.22  | -4.36 |
| <b>2G-TS</b>          | -55577.441  | 534.21  | 265.83  | -3.30 |

|                       |             |         |         |       |
|-----------------------|-------------|---------|---------|-------|
| <b>2G'-TS</b>         | -61867.074  | 585.22  | 289.72  | -4.01 |
| <b>2H</b>             | -55579.063  | 536.30  | 272.39  | -3.51 |
| <b>2H'</b>            | -61868.227  | 586.62  | 295.91  | -3.29 |
| <b>2I</b>             | -66579.109  | 519.603 | 266.499 | -6.36 |
| <b>3</b>              | -72934.726  | 601.80  | 289.23  | -2.78 |
| <b>3-TS</b>           | -72934.304  | 601.72  | 287.63  | -3.54 |
| <b>3A</b>             | -72935.453  | 603.35  | 286.88  | -6.32 |
| <b>3A<sup>a</sup></b> | -6421.110   | -       | -       | -     |
| <b>3A<sup>b</sup></b> | -66546.586  | -       | -       | -     |
| <b>3B</b>             | -72934.656  | 603.962 | 286.054 | -6.15 |
| <b>3C</b>             | -74475.531  | 629.03  | 288.55  | -5.75 |
| <b>3C'</b>            | -80764.797  | 680.07  | 307.65  | -5.09 |
| <b>3D</b>             | -117531.414 | 944.49  | 461.23  | -8.54 |
| <b>3D'</b>            | -123820.727 | 996.72  | 479.49  | -7.60 |
| <b>3D-TS</b>          | -117531.352 | 943.87  | 448.09  | -6.48 |
| <b>3D'-TS</b>         | -123820.461 | 995.28  | 470.33  | -6.34 |
| <b>3E</b>             | -117531.352 | 945.50  | 456.16  | -5.90 |
| <b>3E'</b>            | -123820.500 | 996.23  | 478.65  | -6.20 |
| <b>3F</b>             | -111169.266 | 858.72  | 427.95  | -5.31 |
| <b>3F'</b>            | -117458.602 | 909.84  | 445.68  | -6.66 |
| <b>3G</b>             | -111169.578 | 856.75  | 435.55  | -8.89 |
| <b>3G'</b>            | -117459.000 | 908.72  | 451.15  | -9.81 |
| <b>3H</b>             | -61933.608  | 618.52  | 283.97  | -4.02 |
| <b>3H'</b>            | -68223.227  | 669.50  | 308.86  | -4.15 |
| <b>3H-TS</b>          | -61933.017  | 617.94  | 281.64  | -3.49 |
| <b>3H'-TS</b>         | -68222.656  | 669.21  | 298.02  | -3.86 |
| <b>3I</b>             | -61934.592  | 619.80  | 290.34  | -3.47 |
| <b>3I'</b>            | -68223.870  | 670.25  | 313.25  | -3.40 |
| <b>3J</b>             | -72934.922  | 603.36  | 287.72  | -6.89 |
| <b>3K</b>             | -74475.844  | 627.66  | 299.20  | -6.91 |
| <b>3K'</b>            | -80765.117  | 678.64  | 322.36  | -5.63 |
| <b>3L</b>             | -68295.242  | 706.51  | 310.21  | -3.36 |
| <b>3L'</b>            | -74584.422  | 758.62  | 332.54  | -3.32 |
| <b>3L-TS</b>          | -68294.852  | 703.37  | 310.01  | -2.95 |

|               |             |        |        |       |
|---------------|-------------|--------|--------|-------|
| <b>3L'-TS</b> | -74584.281  | 755.40 | 329.24 | -3.56 |
| <b>3M</b>     | -117531.836 | 945.31 | 466.72 | -7.91 |
| <b>3M'</b>    | -123821.164 | 996.59 | 479.85 | -6.91 |
| <b>3M-TS</b>  | -117531.398 | 941.61 | 463.41 | -8.67 |
| <b>3M'-TS</b> | -123820.836 | 992.48 | 483.44 | -7.72 |
| <b>3N</b>     | -81310.641  | 683.08 | 307.75 | -6.09 |

---

<sup>a</sup>R<sub>1</sub> fragment in Figure S3, <sup>b</sup>Catalyst fragment in Figure S3.

## 6. References

- (1) V. Halaska, L. Lochmann and D. Lim, *Collect. Czech. Chem. Commun.*, 1968, **33**, 3245–3253.
- (2) L. M. Jackman and C. W. DeBrosse, *J. Am. Chem. Soc.*, 1983, **105**, 4177–4184.
- (3) R. M. Kissling and M. R. Gagné, *J. Org. Chem.*, 2001, **66**, 9005–9010.
